# Supplementary material for: Active Merlin Binds RalB to Regulate Exocytosis
Source: bioRxiv preprint, doi:10.1101/2025.06.13.659557, version 1 (2025-06-19)
Supplement: Collated Merlin Proximal Mass Spec Data [file 659557_file03.xlsx]

## Sheet: Collated
Gene	UniProt	Protein	Function	Hein et al Graph	Hein et al Classifier	Location (UniProt)	Subconfluent Merlin isoform 1	Confluent Merlin isoform 1	Subconfluent Merlin isoform 2	Confluent Merlin isoform 2
NF2	P35240	Merlin	Probable regulator of the Hippo/SWH signaling pathway, a signaling pathway that plays a pivotal role in tumor suppression by restricting proliferation and promoting apoptosis. Along with WWC1 can synergistically induce the phosphorylation of LATS1 and LATS2 and can probably function in the regulation of the Hippo/SWH signaling pathway. May act as a membrane stabilizing protein. May inhibit PI3 ki…	actin_cytoskeleton	unclassified	Cell projection, filopodium membrane; Peripheral membrane protein; Cytoplasmic side	124.7	52	141.7	185.3
CTNNB1	P35222	Catenin beta-1	Key downstream component of the canonical Wnt signaling pathway . In the absence of Wnt, forms a complex with AXIN1, AXIN2, APC, CSNK1A1 and GSK3B that promotes phosphorylation on N-terminal Ser and Thr residues and ubiquitination of CTNNB1 via BTRC and its subsequent degradation by the proteasome . In the presence of Wnt ligand, CTNNB1 is not ubiquitinated and accumulates in the nucleus, where i…	plasma_membrane	plasma_membrane	Cytoplasm	29	28	39.33	0
PLS3	P13797	Plastin-3	Actin-bundling protein found in intestinal microvilli, hair cell stereocilia, and fibroblast filopodia. May play a role in the regulation of bone development.	cytosol	unclassified	Cytoplasm	26.33	27.33	0	0
CTNND1	O60716	Catenin delta-1	Key regulator of cell-cell adhesion that associates with and regulates the cell adhesion properties of both C-, E- and N-cadherins, being critical for their surface stability . Beside cell-cell adhesion, regulates gene transcription through several transcription factors including ZBTB33/Kaiso2 and GLIS2, and the activity of Rho family GTPases and downstream cytoskeletal dynamics . Implicated both…	plasma_membrane	plasma_membrane	Cell junction, adherens junction	30	25	29.67	34.67
CALD1	Q05682	Caldesmon	Actin- and myosin-binding protein implicated in the regulation of actomyosin interactions in smooth muscle and nonmuscle cells . Stimulates actin binding of tropomyosin which increases the stabilization of actin filament structure. In muscle tissues, inhibits the actomyosin ATPase by binding to F-actin. This inhibition is attenuated by calcium-calmodulin and is potentiated by tropomyosin. Interac…	actin_cytoskeleton	actin_cytoskeleton	Cytoplasm, cytoskeleton	0	24.67	0	0
CNN3	Q15417	Calponin-3	Thin filament-associated protein that is implicated in the regulation and modulation of smooth muscle contraction. It is capable of binding to actin, calmodulin and tropomyosin. The interaction of calponin with actin inhibits the actomyosin Mg-ATPase activity.	actin_cytoskeleton	unclassified		24	24	32.67	0
TJP2	Q9UDY2	Tight junction protein ZO-2	Plays a role in tight junctions and adherens junctions . Acts as a positive regulator of RANKL-induced osteoclast differentiation, potentially via mediating downstream transcriptional activity . .	plasma_membrane	actin_cytoskeleton	Cell junction, adherens junction	32.67	23.33	0	0
ERBIN	Q96RT1	Erbin	Acts as an adapter for the receptor ERBB2, in epithelia. By binding the unphosphorylated 'Tyr-1248' of receptor ERBB2, it may contribute to stabilize this unphosphorylated state . Inhibits NOD2-dependent NF-kappa-B signaling and pro-inflammatory cytokine secretion . .	plasma_membrane	plasma_membrane	Cell junction, hemidesmosome	27.33	20	19.67	0
CTNNA1	P35221	Catenin alpha-1	Associates with the cytoplasmic domain of a variety of cadherins. The association of catenins to cadherins produces a complex which is linked to the actin filament network, and which seems to be of primary importance for cadherins cell-adhesion properties. Can associate with both E- and N-cadherins. Originally believed to be a stable component of E-cadherin/catenin adhesion complexes and to media…	plasma_membrane	plasma_membrane	Cytoplasm, cytoskeleton	20	19.33	13	0
LASP1	Q14847	LIM and SH3 domain protein 1	Plays an important role in the regulation of dynamic actin-based, cytoskeletal activities. Agonist-dependent changes in LASP1 phosphorylation may also serve to regulate actin-associated ion transport activities, not only in the parietal cell but also in certain other F-actin-rich secretory epithelial cell types . .	cytosol	actin_cytoskeleton	Cytoplasm, cell cortex	21.33	19.33	17.33	0
EZR	P15311	Ezrin	Probably involved in connections of major cytoskeletal structures to the plasma membrane. In epithelial cells, required for the formation of microvilli and membrane ruffles on the apical pole. Along with PLEKHG6, required for normal macropinocytosis. .	plasma_membrane	unclassified	Apical cell membrane ; Peripheral membrane protein ; Cytoplasmic side	17.67	19.33	21.67	0
SERPINH1	P50454	Serpin H1	Binds specifically to collagen. Could be involved as a chaperone in the biosynthetic pathway of collagen.	ER	ER	Endoplasmic reticulum lumen	0	19	21.33	0
MYLK	Q15746	Myosin light chain kinase, smooth muscle	Calcium/calmodulin-dependent myosin light chain kinase implicated in smooth muscle contraction via phosphorylation of myosin light chains . Also regulates actin-myosin interaction through a non-kinase activity. Phosphorylates PTK2B/PYK2 and myosin light-chains. Involved in the inflammatory response , cell motility and morphology, airway hyperreactivity and other activities relevant to asthma. Req…	cytosol	unclassified	Cytoplasm	0	18.67	0	0
ENO1	P06733	Alpha-enolase	Glycolytic enzyme the catalyzes the conversion of 2-phosphoglycerate to phosphoenolpyruvate . In addition to glycolysis, involved in various processes such as growth control, hypoxia tolerance and allergic responses . May also function in the intravascular and pericellular fibrinolytic system due to its ability to serve as a receptor and activator of plasminogen on the cell surface of several cel…	cytosol	cytosol	Cytoplasm	0	18.33	19	25.33
CSPG4	Q6UVK1	Chondroitin sulfate proteoglycan 4	Proteoglycan playing a role in cell proliferation and migration which stimulates endothelial cells motility during microvascular morphogenesis. May also inhibit neurite outgrowth and growth cone collapse during axon regeneration. Cell surface receptor for collagen alpha 2 which may confer cells ability to migrate on that substrate. Binds through its extracellular N-terminus growth factors, extrac…	plasma_membrane	plasma_membrane	Cell membrane ; Single-pass type I membrane protein ; Extracellular side	22	18	19.67	0
EPB41L2	O43491	Band 4.1-like protein 2	Required for dynein-dynactin complex and NUMA1 recruitment at the mitotic cell cortex during anaphase . .	actin_cytoskeleton	plasma_membrane	Cytoplasm, cytoskeleton	18.67	17.67	19.33	0
MTHFD1	P11586	C-1-tetrahydrofolate synthase, cytoplasmic	Trifunctional enzyme that catalyzes the interconversion of three forms of one-carbon-substituted tetrahydrofolate: -5,10-methylene-5,6,7,8-tetrahydrofolate, 5,10-methenyltetrahydrofolate and -10-formyltetrahydrofolate . These derivatives of tetrahydrofolate are differentially required in nucleotide and amino acid biosynthesis, -10-formyltetrahydrofolate being required for purine biosynthesis whil…	stress_granule	stress_granule	Cytoplasm	0	17	0	0
NIBAN2	Q96TA1	Protein Niban 2	May play a role in apoptosis suppression. May promote melanoma cell invasion in vitro. .	cytosol	unclassified	Cytoplasm, cytosol	12.67	17	16	14.33
EPS8	Q12929	Epidermal growth factor receptor kinase substrate 8	Signaling adapter that controls various cellular protrusions by regulating actin cytoskeleton dynamics and architecture. Depending on its association with other signal transducers, can regulate different processes. Together with SOS1 and ABI1, forms a trimeric complex that participates in transduction of signals from Ras to Rac by activating the Rac-specific guanine nucleotide exchange factor act…	plasma_membrane	unclassified	Cytoplasm, cell cortex	18.33	16.33	0	19.67
MPDZ	O75970	Multiple PDZ domain protein	Member of the NMDAR signaling complex that may play a role in control of AMPAR potentiation and synaptic plasticity in excitatory synapses . Promotes clustering of HT2RC at the cell surface . .	actin_cytoskeleton	actin_cytoskeleton	Cell membrane; Peripheral membrane protein; Cytoplasmic side	20.67	16	10.33	0
SCRIB	Q14160	Protein scribble homolog	Scaffold protein involved in different aspects of polarized cell differentiation regulating epithelial and neuronal morphogenesis and T-cell polarization . Via its interaction with CRTAM, required for the late phase polarization of a subset of CD4+ T-cells, which in turn regulates TCR-mediated proliferation and IFNG and IL22 production . Most probably functions in the establishment of apico-basal…	plasma_membrane	plasma_membrane	Cell membrane ; Peripheral membrane protein	18.67	16	15.67	0
PPP1R12A	O14974	Protein phosphatase 1 regulatory subunit 12A	Key regulator of protein phosphatase 1C . Mediates binding to myosin. As part of the PPP1C complex, involved in dephosphorylation of PLK1. Capable of inhibiting HIF1AN-dependent suppression of HIF1A activity. .	plasma_membrane	actin_cytoskeleton	Cytoplasm	18.33	15.67	0	0
AARS1	P49588	Alanine--tRNA ligase, cytoplasmic	Catalyzes the attachment of alanine to tRNA in a two-step reaction: alanine is first activated by ATP to form Ala-AMP and then transferred to the acceptor end of tRNA . Also edits incorrectly charged tRNA via its editing domain . .	cytosol	unclassified	Cytoplasm	19	15.67	0	0
EHD2	Q9NZN4	EH domain-containing protein 2	ATP- and membrane-binding protein that controls membrane reorganization/tubulation upon ATP hydrolysis . Plays a role in membrane trafficking between the plasma membrane and endosomes . Important for the internalization of GLUT4. Required for fusion of myoblasts to skeletal muscle myotubes. Required for normal translocation of FER1L5 to the plasma membrane . Regulates the equilibrium between cell…	plasma_membrane	plasma_membrane	Cell membrane ; Peripheral membrane protein ; Cytoplasmic side	13	14.67	12.67	0
DPYSL3	Q14195	Dihydropyrimidinase-related protein 3	Necessary for signaling by class 3 semaphorins and subsequent remodeling of the cytoskeleton. Plays a role in axon guidance, neuronal growth cone collapse and cell migration . .			Cytoplasm	0	14.67	15	15.67
CYFIP1	Q7L576	Cytoplasmic FMR1-interacting protein 1	Component of the CYFIP1-EIF4E-FMR1 complex which binds to the mRNA cap and mediates translational repression. In the CYFIP1-EIF4E-FMR1 complex this subunit is an adapter between EIF4E and FMR1. Promotes the translation repression activity of FMR1 in brain probably by mediating its association with EIF4E and mRNA . Regulates formation of membrane ruffles and lamellipodia. Plays a role in axon outg…	actin_cytoskeleton	actin_cytoskeleton	Cytoplasm	12	14.67	19.67	0
EIF4A2	Q14240	Eukaryotic initiation factor 4A-II	ATP-dependent RNA helicase which is a subunit of the eIF4F complex involved in cap recognition and is required for mRNA binding to ribosome. In the current model of translation initiation, eIF4A unwinds RNA secondary structures in the 5'-UTR of mRNAs which is necessary to allow efficient binding of the small ribosomal subunit, and subsequent scanning for the initiator codon.	stress_granule	unclassified		18.67	14	22.33	20.33
UGDH	O60701	UDP-glucose 6-dehydrogenase	Catalyzes the formation of UDP-alpha-D-glucuronate, a constituent of complex glycosaminoglycans . Required for the biosynthesis of chondroitin sulfate and heparan sulfate. Required for embryonic development via its role in the biosynthesis of glycosaminoglycans . Required for proper brain and neuronal development . .	cytosol	cytosol		0	13.67	0	0
MSN	P26038	Moesin	Ezrin-radixin-moesin family protein that connects the actin cytoskeleton to the plasma membrane and thereby regulates the structure and function of specific domains of the cell cortex. Tethers actin filaments by oscillating between a resting and an activated state providing transient interactions between moesin and the actin cytoskeleton . Once phosphorylated on its C-terminal threonine, moesin i…	plasma_membrane	plasma_membrane	Cell membrane ; Peripheral membrane protein ; Cytoplasmic side	14.33	13.67	17.33	0
COPG1	Q9Y678	Coatomer subunit gamma-1	The coatomer is a cytosolic protein complex that binds to dilysine motifs and reversibly associates with Golgi non-clathrin-coated vesicles, which further mediate biosynthetic protein transport from the ER, via the Golgi up to the trans Golgi network. Coatomer complex is required for budding from Golgi membranes, and is essential for the retrograde Golgi-to-ER transport of dilysine-tagged protein…	ERGIC	ERGIC	Cytoplasm	13.33	13.33	13.33	0
AMOTL2	Q9Y2J4	Angiomotin-like protein 2	Regulates the translocation of phosphorylated SRC to peripheral cell-matrix adhesion sites. Required for proper architecture of actin filaments. Inhibits the Wnt/beta-catenin signaling pathway, probably by recruiting CTNNB1 to recycling endosomes and hence preventing its translocation to the nucleus. Participates in angiogenesis. May play a role in the polarity, proliferation and migration of end…	14-3-3_scaffold	cytosol	Recycling endosome	36.67	13.33	19.33	0
TAGLN2	P37802	Transgelin-2		cytosol	unclassified		12.67	13	13.67	0
ITGB1	P05556	Integrin beta-1	Integrins alpha-1/beta-1, alpha-2/beta-1, alpha-10/beta-1 and alpha-11/beta-1 are receptors for collagen. Integrins alpha-1/beta-1 and alpha-2/beta-2 recognize the proline-hydroxylated sequence G-F-P-G-E-R in collagen. Integrins alpha-2/beta-1, alpha-3/beta-1, alpha-4/beta-1, alpha-5/beta-1, alpha-8/beta-1, alpha-10/beta-1, alpha-11/beta-1 and alpha-V/beta-1 are receptors for fibronectin. Alpha-4…	plasma_membrane	plasma_membrane	Cell membrane ; Single-pass type I membrane protein	12	13	18.33	17
SH3BP4	Q9P0V3	SH3 domain-binding protein 4	May function in transferrin receptor internalization at the plasma membrane through a cargo-specific control of clathrin-mediated endocytosis. Alternatively, may act as a negative regulator of the amino acid-induced TOR signaling by inhibiting the formation of active Rag GTPase complexes. Preferentially binds inactive Rag GTPase complexes and prevents their interaction with the mTORC1 complex inh…	plasma_membrane	plasma_membrane	Membrane, clathrin-coated pit	18.33	13	15.33	14.67
ATP1A1	P05023	Sodium/potassium-transporting ATPase subunit alpha-1 /K ATPase alpha-1 subunit	This is the catalytic component of the active enzyme, which catalyzes the hydrolysis of ATP coupled with the exchange of sodium and potassium ions across the plasma membrane. This action creates the electrochemical gradient of sodium and potassium ions, providing the energy for active transport of various nutrients. .	plasma_membrane	plasma_membrane	Basolateral cell membrane ; Multi-pass membrane protein	18.33	12.67	13.33	15.67
GART	P22102	Trifunctional purine biosynthetic protein adenosine-3	Trifunctional enzyme that catalyzes three distinct reactions as part of the 'de novo' inosine monophosphate biosynthetic pathway. .	cytosol	unclassified		13	12.33	0	0
CDH2	P19022	Cadherin-2	Calcium-dependent cell adhesion protein; preferentially mediates homotypic cell-cell adhesion by dimerization with a CDH2 chain from another cell. Cadherins may thus contribute to the sorting of heterogeneous cell types. Acts as a regulator of neural stem cells quiescence by mediating anchorage of neural stem cells to ependymocytes in the adult subependymal zone: upon cleavage by MMP24, CDH2-medi…	plasma_membrane	plasma_membrane	Cell membrane ; Single-pass type I membrane protein	13.33	12.33	0	0
CAND1	Q86VP6	Cullin-associated NEDD8-dissociated protein 1	Key assembly factor of SCF E3 ubiquitin ligase complexes that promotes the exchange of the substrate-recognition F-box subunit in SCF complexes, thereby playing a key role in the cellular repertoire of SCF complexes. Acts as a F-box protein exchange factor. The exchange activity of CAND1 is coupled with cycles of neddylation conjugation: in the deneddylated state, cullin-binding CAND1 binds CUL1-…	cytosol	unclassified	Cytoplasm	0	12	0	0
PI4KA	P42356	Phosphatidylinositol 4-kinase alpha	Acts on phosphatidylinositol in the first committed step in the production of the second messenger inositol-1,4,5,-trisphosphate. .	actin_cytoskeleton	plasma_membrane	Cytoplasm	10	12	0	0
DLG1	Q12959	Disks large homolog 1	Essential multidomain scaffolding protein required for normal development . Recruits channels, receptors and signaling molecules to discrete plasma membrane domains in polarized cells. May play a role in adherens junction assembly, signal transduction, cell proliferation, synaptogenesis and lymphocyte activation. Regulates the excitability of cardiac myocytes by modulating the functional expressi…	plasma_membrane	plasma_membrane	Membrane ; Peripheral membrane protein	13.33	12	0	0
UTRN	P46939	Utrophin	May play a role in anchoring the cytoskeleton to the plasma membrane. .	plasma_membrane	plasma_membrane	Postsynaptic cell membrane; Peripheral membrane protein; Cytoplasmic side	17.67	12	0	0
TENM3	Q9P273	Teneurin-3	Involved in neural development by regulating the establishment of proper connectivity within the nervous system. Acts in both pre- and postsynaptic neurons in the hippocampus to control the assembly of a precise topographic projection: required in both CA1 and subicular neurons for the precise targeting of proximal CA1 axons to distal subiculum, probably by promoting homophilic cell adhesion. Req…	plasma_membrane	plasma_membrane	Cell membrane ; Single-pass membrane protein	11.67	12	13.33	0
HSPH1	Q92598	Heat shock protein 105 kDa	Acts as a nucleotide-exchange factor for chaperone proteins HSPA1A and HSPA1B, promoting the release of ADP from HSPA1A/B thereby triggering client/substrate protein release . Prevents the aggregation of denatured proteins in cells under severe stress, on which the ATP levels decrease markedly. Inhibits HSPA8/HSC70 ATPase and chaperone activities . .	cytosol	cytosol	Cytoplasm	0	11.67	11	0
SEPTIN2	Q15019	Septin-2	Filament-forming cytoskeletal GTPase. Forms a filamentous structure with SEPTIN12, SEPTIN6, SEPTIN2 and probably SEPTIN4 at the sperm annulus which is required for the structural integrity and motility of the sperm tail during postmeiotic differentiation . Required for normal organization of the actin cytoskeleton. Plays a role in the biogenesis of polarized columnar-shaped epithelium by maintain…	plasma_membrane	actin_cytoskeleton	Cytoplasm	12.33	11.67	0	0
NOTCH2	Q04721	Neurogenic locus notch homolog protein 2	Functions as a receptor for membrane-bound ligands Jagged-1 , Jagged-2 and Delta-1 to regulate cell-fate determination. Upon ligand activation through the released notch intracellular domain it forms a transcriptional activator complex with RBPJ/RBPSUH and activates genes of the enhancer of split locus . Affects the implementation of differentiation, proliferation and apoptotic programs . Involve…	plasma_membrane	plasma_membrane	Cell membrane ; Single-pass type I membrane protein	11.33	11.67	10.67	0
ARF3	P61204	ADP-ribosylation factor 3	GTP-binding protein that functions as an allosteric activator of the cholera toxin catalytic subunit, an ADP-ribosyltransferase. Involved in protein trafficking; may modulate vesicle budding and uncoating within the Golgi apparatus.			Golgi apparatus	0	11.67	13.67	16.33
ITGA3	P26006	Integrin alpha-3	Integrin alpha-3/beta-1 is a receptor for fibronectin, laminin, collagen, epiligrin, thrombospondin and CSPG4. Integrin alpha-3/beta-1 provides a docking site for FAP at invadopodia plasma membranes in a collagen-dependent manner and hence may participate in the adhesion, formation of invadopodia and matrix degradation processes, promoting cell invasion. Alpha-3/beta-1 may mediate with LGALS3 the…			Cell membrane ; Single-pass type I membrane protein	12.33	11.33	11.67	0
TUBB6	Q9BUF5	Tubulin beta-6 chain	Tubulin is the major constituent of microtubules, a cylinder consisting of laterally associated linear protofilaments composed of alpha- and beta-tubulin heterodimers. Microtubules grow by the addition of GTP-tubulin dimers to the microtubule end, where a stabilizing cap forms. Below the cap, tubulin dimers are in GDP-bound state, owing to GTPase activity of alpha-tubulin. .	cytosol	cytosol	Cytoplasm, cytoskeleton	14.67	11.33	20	18.67
ARHGAP35	Q9NRY4	Rho GTPase-activating protein 35	Rho GTPase-activating protein . Binds several acidic phospholipids which inhibits the Rho GAP activity to promote the Rac GAP activity . This binding is inhibited by phosphorylation by PRKCA . Involved in cell differentiation as well as cell adhesion and migration, plays an important role in retinal tissue morphogenesis, neural tube fusion, midline fusion of the cerebral hemispheres and mammary g…	plasma_membrane	unclassified	Cytoplasm, cytoskeleton, cilium basal body	0	11	0	0
INPPL1	O15357	Phosphatidylinositol 3,4,5-trisphosphate 5-phosphatase 2	Phosphatidylinositol phosphatase that specifically hydrolyzes the 5-phosphate of phosphatidylinositol-3,4,5-trisphosphate P3 to produce PtdInsP2, thereby negatively regulating the PI3K pathways . Required for correct mitotic spindle orientation and therefore progression of mitosis . Plays a central role in regulation of PI3K-dependent insulin signaling, although the precise molecular mechanisms a…	cytosol	cytosol	Cytoplasm, cytosol	8.667	11	0	0
WDR44	Q5JSH3	WD repeat-containing protein 44	Downstream effector for RAB11. May be involved in vesicle recycling . .	recycling_endosome	unclassified	Cytoplasm, cytosol	0	10.67	0	0
HGS	O14964	Hepatocyte growth factor-regulated tyrosine kinase substrate	Involved in intracellular signal transduction mediated by cytokines and growth factors. When associated with STAM, it suppresses DNA signaling upon stimulation by IL-2 and GM-CSF. Could be a direct effector of PI3-kinase in vesicular pathway via early endosomes and may regulate trafficking to early and late endosomes by recruiting clathrin. May concentrate ubiquitinated receptors within clathrin-…	lysosome	early_endosome	Cytoplasm	0	10.33	0	0
SNX9	Q9Y5X1	Sorting nexin-9	Involved in endocytosis and intracellular vesicle trafficking, both during interphase and at the end of mitosis. Required for efficient progress through mitosis and cytokinesis. Required for normal formation of the cleavage furrow at the end of mitosis. Plays a role in endocytosis via clathrin-coated pits, but also clathrin-independent, actin-dependent fluid-phase endocytosis. Plays a role in mac…	actin_cytoskeleton	plasma_membrane	Cytoplasmic vesicle membrane; Peripheral membrane protein; Cytoplasmic side	0	10.33	0	0
ANXA5	P08758	Annexin A5	This protein is an anticoagulant protein that acts as an indirect inhibitor of the thromboplastin-specific complex, which is involved in the blood coagulation cascade.	cytosol	unclassified		0	10.33	0	0
FERMT2	Q96AC1	Fermitin family homolog 2	Scaffolding protein that enhances integrin activation mediated by TLN1 and/or TLN2, but activates integrins only weakly by itself. Binds to membranes enriched in phosphoinositides. Enhances integrin-mediated cell adhesion onto the extracellular matrix and cell spreading; this requires both its ability to interact with integrins and with phospholipid membranes. Required for the assembly of focal a…	actin_cytoskeleton	unclassified	Cytoplasm	8	10.33	0	0
RPL9	P32969	Large ribosomal subunit protein uL6	Component of the large ribosomal subunit . The ribosome is a large ribonucleoprotein complex responsible for the synthesis of proteins in the cell . .			Cytoplasm	8.667	10.33	0	0
CFL1	P23528	Cofilin-1	Binds to F-actin and exhibits pH-sensitive F-actin depolymerizing activity . In conjunction with the subcortical maternal complex , plays an essential role for zygotes to progress beyond the first embryonic cell divisions via regulation of actin dynamics . Required for the centralization of the mitotic spindle and symmetric division of zygotes . Plays a role in the regulation of cell morphology a…	actin_cytoskeleton	actin_cytoskeleton	Nucleus matrix	9.333	10.33	0	0
SEC23A	Q15436	Protein transport protein Sec23A	Component of the coat protein complex II which promotes the formation of transport vesicles from the endoplasmic reticulum . The coat has two main functions, the physical deformation of the endoplasmic reticulum membrane into vesicles and the selection of cargo molecules for their transport to the Golgi complex. Required for the translocation of insulin-induced glucose transporter SLC2A4/GLUT4 to…	Golgi	ERGIC	Cytoplasmic vesicle, COPII-coated vesicle membrane ; Peripheral membrane protein ; Cytoplasmic side	10.67	10.33	0	0
ATP2B4	P23634	Plasma membrane calcium-transporting ATPase 4	Calcium/calmodulin-regulated and magnesium-dependent enzyme that catalyzes the hydrolysis of ATP coupled with the transport of calcium out of the cell . By regulating sperm cell calcium homeostasis, may play a role in sperm motility . .	plasma_membrane	plasma_membrane	Cell membrane ; Multi-pass membrane protein	11.33	10.33	0	0
ARCN1	P48444	Coatomer subunit delta	Component of the coatomer, a cytosolic protein complex that binds to dilysine motifs and reversibly associates with Golgi non-clathrin-coated vesicles, which further mediate biosynthetic protein transport from the ER, via the Golgi up to the trans Golgi network. The coatomer complex is required for budding from Golgi membranes, and is essential for the retrograde Golgi-to-ER transport of dilysine…	ERGIC	ERGIC	Cytoplasm	0	10.33	8.667	7
DDX46	Q7L014	Probable ATP-dependent RNA helicase DDX46	Plays an essential role in splicing, either prior to, or during splicing A complex formation. .	nucleus	centrosome	Nucleus speckle	0	10	0	0
RASA1	P20936	Ras GTPase-activating protein 1	Inhibitory regulator of the Ras-cyclic AMP pathway. Stimulates the GTPase of normal but not oncogenic Ras p21; this stimulation may be further increased in the presence of NCK1. .	cytosol	cytosol	Cytoplasm	0	10	6.667	0
PLCB3	Q01970	1-phosphatidylinositol 4,5-bisphosphate phosphodiesterase beta-3	The production of the second messenger molecules diacylglycerol and inositol 1,4,5-trisphosphate is mediated by activated phosphatidylinositol-specific phospholipase C enzymes. .	plasma_membrane	plasma_membrane	Cytoplasm	9	10	0	0
PHLDB2	Q86SQ0	Pleckstrin homology-like domain family B member 2	Seems to be involved in the assembly of the postsynaptic apparatus. May play a role in acetyl-choline receptor aggregation in the postsynaptic membrane . .	actin_cytoskeleton	actin_cytoskeleton	Cytoplasm	10.33	10	0	0
AFDN	P55196	Afadin	Belongs to an adhesion system, probably together with the E-cadherin-catenin system, which plays a role in the organization of homotypic, interneuronal and heterotypic cell-cell adherens junctions . Nectin- and actin-filament-binding protein that connects nectin to the actin cytoskeleton . May play a key role in the organization of epithelial structures of the embryonic ectoderm . Essential for t…	plasma_membrane	actin_cytoskeleton	Cell junction, adherens junction	8.667	10	6.667	0
DNM2	P50570	Dynamin-2	Microtubule-associated force-producing protein involved in producing microtubule bundles and able to bind and hydrolyze GTP. Plays a role in the regulation of neuron morphology, axon growth and formation of neuronal growth cones . Plays an important role in vesicular trafficking processes, in particular endocytosis . Involved in cytokinesis . Regulates maturation of apoptotic cell corpse-containi…	actin_cytoskeleton	actin_cytoskeleton	Cytoplasm	0	9.667	0	0
TLN2	Q9Y4G6	Talin-2	As a major component of focal adhesion plaques that links integrin to the actin cytoskeleton, may play an important role in cell adhesion. Recruits PIP5K1C to focal adhesion plaques and strongly activates its kinase activity . .	plasma_membrane	actin_cytoskeleton	Cytoplasm	0	9.667	0	0
PYGB	P11216	Glycogen phosphorylase, brain form	Glycogen phosphorylase that regulates glycogen mobilization . Phosphorylase is an important allosteric enzyme in carbohydrate metabolism . Enzymes from different sources differ in their regulatory mechanisms and in their natural substrates . However, all known phosphorylases share catalytic and structural properties . .	cytosol	cytosol		0	9.667	0	0
PDGFRB	P09619	Platelet-derived growth factor receptor beta	Tyrosine-protein kinase that acts as cell-surface receptor for homodimeric PDGFB and PDGFD and for heterodimers formed by PDGFA and PDGFB, and plays an essential role in the regulation of embryonic development, cell proliferation, survival, differentiation, chemotaxis and migration. Plays an essential role in blood vessel development by promoting proliferation, migration and recruitment of pericy…			Cell membrane; Single-pass type I membrane protein	0	9.667	6	0
AP1B1	Q10567	AP-1 complex subunit beta-1	Subunit of clathrin-associated adaptor protein complex 1 that plays a role in protein sorting in the late-Golgi/trans-Golgi network and/or endosomes . The AP complexes mediate both the recruitment of clathrin to membranes and the recognition of sorting signals within the cytosolic tails of transmembrane cargo molecules. .	early_endosome	early_endosome	Golgi apparatus	9.667	9.667	0	0
ILK	Q13418	Integrin-linked protein kinase	Receptor-proximal protein kinase regulating integrin-mediated signal transduction . May act as a mediator of inside-out integrin signaling . Focal adhesion protein part of the complex ILK-PINCH . This complex is considered to be one of the convergence points of integrin- and growth factor-signaling pathway . Could be implicated in mediating cell architecture, adhesion to integrin substrates and a…	actin_cytoskeleton	unclassified	Cell junction, focal adhesion	9.333	9.667	8.333	0
NRP1	O14786	Neuropilin-1	Cell-surface receptor involved in the development of the cardiovascular system, in angiogenesis, in the formation of certain neuronal circuits and in organogenesis outside the nervous system. Mediates the chemorepulsant activity of semaphorins . Recognizes a C-end rule motif R/KXXR/K on its ligands which causes cellular internalization and vascular leakage . It binds to semaphorin 3A, the PLGF-2 …	plasma_membrane	plasma_membrane	Secreted	9.333	9.667	8	11.33
NPEPPS	P55786	Puromycin-sensitive aminopeptidase	Aminopeptidase with broad substrate specificity for several peptides. Involved in proteolytic events essential for cell growth and viability. May act as regulator of neuropeptide activity. Plays a role in the antigen-processing pathway for MHC class I molecules. Involved in the N-terminal trimming of cytotoxic T-cell epitope precursors. Digests the poly-Q peptides found in many cellular proteins.…	mitochondrion	unclassified	Cytoplasm, cytosol	5.667	9.667	9.667	13.33
PICALM	Q13492	Phosphatidylinositol-binding clathrin assembly protein	Cytoplasmic adapter protein that plays a critical role in clathrin-mediated endocytosis which is important in processes such as internalization of cell receptors, synaptic transmission or removal of apoptotic cells. Recruits AP-2 and attaches clathrin triskelions to the cytoplasmic side of plasma membrane leading to clathrin-coated vesicles assembly . Furthermore, regulates clathrin-coated vesicl…	actin_cytoskeleton	actin_cytoskeleton	Cell membrane	0	9.333	0	0
CDH6	P55285	Cadherin-6	Cadherins are calcium-dependent cell adhesion proteins. They preferentially interact with themselves in a homophilic manner in connecting cells; cadherins may thus contribute to the sorting of heterogeneous cell types.			Cell membrane; Single-pass type I membrane protein	0	9.333	0	0
RAB1A	P62820	Ras-related protein Rab-1A	The small GTPases Rab are key regulators of intracellular membrane trafficking, from the formation of transport vesicles to their fusion with membranes . Rabs cycle between an inactive GDP-bound form and an active GTP-bound form that is able to recruit to membranes different sets of downstream effectors directly responsible for vesicle formation, movement, tethering and fusion . RAB1A regulates v…	Golgi	ERGIC	Golgi apparatus	0	9.333	8	0
YARS1	P54577	Tyrosine--tRNA ligase, cytoplasmic	Tyrosine--tRNA ligase that catalyzes the attachment of tyrosine to tRNA in a two-step reaction: tyrosine is first activated by ATP to form Tyr-AMP and then transferred to the acceptor end of tRNA . Also acts as a positive regulator of poly-ADP-ribosylation in the nucleus, independently of its tyrosine--tRNA ligase activity . Activity is switched upon resveratrol-binding: resveratrol strongly inhi…	cytosol	actin_cytoskeleton	Cytoplasm	8.667	9.333	0	0
PHLDB1	Q86UU1	Pleckstrin homology-like domain family B member 1		plasma_membrane	actin_cytoskeleton		0	9.333	9	0
PPP1R18	Q6NYC8	Phostensin	: May target protein phosphatase 1 to F-actin cytoskeleton. .; : May target protein phosphatase 1 to F-actin cytoskeleton. .	actin_cytoskeleton	actin_cytoskeleton	Cytoplasm, cytoskeleton	0	9	0	0
MYBBP1A	Q9BQG0	Myb-binding protein 1A	May activate or repress transcription via interactions with sequence specific DNA-binding proteins . Repression may be mediated at least in part by histone deacetylase activity . Acts as a corepressor and in concert with CRY1, represses the transcription of the core circadian clock component PER2 . Preferentially binds to dimethylated histone H3 'Lys-9' on the PER2 promoter . Has a role in rRNA b…	nucleolus	unclassified	Cytoplasm	0	9	11.33	0
ITGAV	P06756	Integrin alpha-V	The alpha-V integrins are receptors for vitronectin, cytotactin, fibronectin, fibrinogen, laminin, matrix metalloproteinase-2, osteopontin, osteomodulin, prothrombin, thrombospondin and vWF. They recognize the sequence R-G-D in a wide array of ligands. ITGAV:ITGB3 binds to fractalkine and may act as its coreceptor in CX3CR1-dependent fractalkine signaling . ITGAV:ITGB3 binds to NRG1 and this bind…	plasma_membrane	plasma_membrane	Cell membrane; Single-pass type I membrane protein	7.667	9	6.667	0
EPHA2	P29317	Ephrin type-A receptor 2	Receptor tyrosine kinase which binds promiscuously membrane-bound ephrin-A family ligands residing on adjacent cells, leading to contact-dependent bidirectional signaling into neighboring cells. The signaling pathway downstream of the receptor is referred to as forward signaling while the signaling pathway downstream of the ephrin ligand is referred to as reverse signaling. Activated by the ligan…	plasma_membrane	plasma_membrane	Cell membrane ; Single-pass type I membrane protein	8.667	9	8	0
AP2A1	O95782	AP-2 complex subunit alpha-1	Component of the adaptor protein complex 2 . Adaptor protein complexes function in protein transport via transport vesicles in different membrane traffic pathways. Adaptor protein complexes are vesicle coat components and appear to be involved in cargo selection and vesicle formation. AP-2 is involved in clathrin-dependent endocytosis in which cargo proteins are incorporated into vesicles surroun…	actin_cytoskeleton	unclassified	Cell membrane	0	8.667	0	0
USP15	Q9Y4E8	Ubiquitin carboxyl-terminal hydrolase 15	Hydrolase that removes conjugated ubiquitin from target proteins and regulates various pathways such as the TGF-beta receptor signaling, NF-kappa-B and RNF41/NRDP1-PRKN pathways . Acts as a key regulator of TGF-beta receptor signaling pathway, but the precise mechanism is still unclear: according to a report, acts by promoting deubiquitination of monoubiquitinated R-SMADs , thereby alleviating in…	proteasome	cytosol	Cytoplasm	0	8.667	0	0
ANK3	Q12955	Ankyrin-3	In skeletal muscle, required for costamere localization of DMD and betaDAG1 . Membrane-cytoskeleton linker. May participate in the maintenance/targeting of ion channels and cell adhesion molecules at the nodes of Ranvier and axonal initial segments. Regulates KCNA1 channel activity in function of dietary Mg levels, and thereby contributes to the regulation of renal Mg reabsorption . .; : May be p…	cytosol	cytosol	Cytoplasm, cytoskeleton	0	8.667	0	0
NEXN	Q0ZGT2	Nexilin	Involved in regulating cell migration through association with the actin cytoskeleton. Has an essential role in the maintenance of Z line and sarcomere integrity. .	actin_cytoskeleton	actin_cytoskeleton	Cytoplasm, cytoskeleton	0	8.667	0	0
PHGDH	O43175	D-3-phosphoglycerate dehydrogenase	Catalyzes the reversible oxidation of 3-phospho-D-glycerate to 3-phosphonooxypyruvate, the first step of the phosphorylated L-serine biosynthesis pathway. Also catalyzes the reversible oxidation of 2-hydroxyglutarate to 2-oxoglutarate and the reversible oxidation of -malate to oxaloacetate. .	cytosol	cytosol		7.333	8.667	0	0
XPOT	O43592	Exportin-T	Mediates the nuclear export of aminoacylated tRNAs. In the nucleus binds to tRNA and to the GTPase Ran in its active GTP-bound form. Docking of this trimeric complex to the nuclear pore complex is mediated through binding to nucleoporins. Upon transit of a nuclear export complex into the cytoplasm, disassembling of the complex and hydrolysis of Ran-GTP to Ran-GDP cause release of the tRNA from th…	cytosol	cytosol	Nucleus	8	8.667	0	0
PKN2	Q16513	Serine/threonine-protein kinase N2	PKC-related serine/threonine-protein kinase and Rho/Rac effector protein that participates in specific signal transduction responses in the cell. Plays a role in the regulation of cell cycle progression, actin cytoskeleton assembly, cell migration, cell adhesion, tumor cell invasion and transcription activation signaling processes. Phosphorylates CTTN in hyaluronan-induced astrocytes and hence de…	actin_cytoskeleton	plasma_membrane	Cytoplasm	12.33	8.667	0	0
CANX	P27824	Calnexin	Calcium-binding protein that interacts with newly synthesized monoglucosylated glycoproteins in the endoplasmic reticulum. It may act in assisting protein assembly and/or in the retention within the ER of unassembled protein subunits. It seems to play a major role in the quality control apparatus of the ER by the retention of incorrectly folded proteins. Associated with partial T-cell antigen rec…	ER	ER	Endoplasmic reticulum membrane ; Single-pass type I membrane protein	0	8.333	0	0
NAMPT	P43490	Nicotinamide phosphoribosyltransferase	Catalyzes the condensation of nicotinamide with 5-phosphoribosyl-1-pyrophosphate to yield nicotinamide mononucleotide, an intermediate in the biosynthesis of NAD. It is the rate limiting component in the mammalian NAD biosynthesis pathway. The secreted form behaves both as a cytokine with immunomodulating properties and an adipokine with anti-diabetic properties, it has no enzymatic activity, par…	cytosol	cytosol	Nucleus	0	8.333	0	0
ITGA2	P17301	Integrin alpha-2	Integrin alpha-2/beta-1 is a receptor for laminin, collagen, collagen C-propeptides, fibronectin and E-cadherin. It recognizes the proline-hydroxylated sequence G-F-P-G-E-R in collagen. It is responsible for adhesion of platelets and other cells to collagens, modulation of collagen and collagenase gene expression, force generation and organization of newly synthesized extracellular matrix.; Integ…	plasma_membrane	plasma_membrane	Membrane; Single-pass type I membrane protein	0	8.333	9.333	0
RRAS2	P62070	Ras-related protein R-Ras2	GTP-binding protein with GTPase activity involved in the regulation of MAPK signaling pathway, thereby controlling multiple cellular processes . Involved in the regulation of MAPK signaling pathway . Regulation of craniofacial development . .	plasma_membrane	plasma_membrane	Cell membrane ; Lipid-anchor ; Cytoplasmic side	0	8.333	9.667	0
SEPTIN7	Q16181	Septin-7	Filament-forming cytoskeletal GTPase. Required for normal organization of the actin cytoskeleton. Required for normal progress through mitosis. Involved in cytokinesis. Required for normal association of CENPE with the kinetochore. Plays a role in ciliogenesis and collective cell movements. Forms a filamentous structure with SEPTIN12, SEPTIN6, SEPTIN2 and probably SEPTIN4 at the sperm annulus whi…	actin_cytoskeleton	plasma_membrane	Cytoplasm	10.33	8.333	10.33	0
CNN2	Q99439	Calponin-2	Thin filament-associated protein that is implicated in the regulation and modulation of smooth muscle contraction. It is capable of binding to actin, calmodulin and tropomyosin. The interaction of calponin with actin inhibits the actomyosin Mg-ATPase activity.	unclassified	unclassified		0	8.333	10.67	14.67
ASMTL	O95671	Probable bifunctional dTTP/UTP pyrophosphatase/methyltransferase protein	Nucleoside triphosphate pyrophosphatase that hydrolyzes dTTP and UTP. Can also hydrolyze CTP and the modified nucleotides pseudo-UTP, 5-methyl-UTP UTP and 5-methyl-CTP CTP. Has weak activity with dCTP, 8-oxo-GTP and N-methyl-dCTP . May have a dual role in cell division arrest and in preventing the incorporation of modified nucleotides into cellular nucleic acids . In addition, the presence of the…	cytosol	cytosol		6.333	8	0	0
TBC1D15	Q8TC07	TBC1 domain family member 15	Acts as a GTPase activating protein for RAB7A. Does not act on RAB4, RAB5 or RAB6 . .	cytosol	cytosol	Cytoplasm	7	8	0	0
PTPN14	Q15678	Tyrosine-protein phosphatase non-receptor type 14	Protein tyrosine phosphatase which may play a role in the regulation of lymphangiogenesis, cell-cell adhesion, cell-matrix adhesion, cell migration, cell growth and also regulates TGF-beta gene expression, thereby modulating epithelial-mesenchymal transition. Mediates beta-catenin dephosphorylation at adhesion junctions. Acts as a negative regulator of the oncogenic property of YAP, a downstream …	unclassified	unclassified	Cytoplasm	9.333	8	6.667	0
EHD1	Q9H4M9	EH domain-containing protein 1	ATP- and membrane-binding protein that controls membrane reorganization/tubulation upon ATP hydrolysis. In vitro causes vesiculation of endocytic membranes . Acts in early endocytic membrane fusion and membrane trafficking of recycling endosomes . Recruited to endosomal membranes upon nerve growth factor stimulation, indirectly regulates neurite outgrowth . Plays a role in myoblast fusion . Invol…	plasma_membrane	unclassified	Recycling endosome membrane ; Peripheral membrane protein ; Cytoplasmic side	0	7.667	0	0
PARD3	Q8TEW0	Partitioning defective 3 homolog	Adapter protein involved in asymmetrical cell division and cell polarization processes . Seems to play a central role in the formation of epithelial tight junctions . Targets the phosphatase PTEN to cell junctions . Involved in Schwann cell peripheral myelination . Association with PARD6B may prevent the interaction of PARD3 with F11R/JAM1, thereby preventing tight junction assembly . The PARD6-P…	plasma_membrane	actin_cytoskeleton	Cytoplasm	8.667	7.667	5	0
CCT5	P48643	T-complex protein 1 subunit epsilon	Component of the chaperonin-containing T-complex , a molecular chaperone complex that assists the folding of proteins upon ATP hydrolysis . The TRiC complex mediates the folding of WRAP53/TCAB1, thereby regulating telomere maintenance . As part of the TRiC complex may play a role in the assembly of BBSome, a complex involved in ciliogenesis regulating transports vesicles to the cilia . The TRiC c…	actin_cytoskeleton	unclassified	Cytoplasm	0	7.333	0	0
PSME1	Q06323	Proteasome activator complex subunit 1	Implicated in immunoproteasome assembly and required for efficient antigen processing. The PA28 activator complex enhances the generation of class I binding peptides by altering the cleavage pattern of the proteasome.	proteasome	cytosol		0	7.333	0	0
ITGA7	Q13683	Integrin alpha-7	Integrin alpha-7/beta-1 is the primary laminin receptor on skeletal myoblasts and adult myofibers. During myogenic differentiation, it may induce changes in the shape and mobility of myoblasts, and facilitate their localization at laminin-rich sites of secondary fiber formation. It is involved in the maintenance of the myofibers cytoarchitecture as well as for their anchorage, viability and funct…			Membrane; Single-pass type I membrane protein	0	7.333	4	0
BICC1	Q9H694	Protein bicaudal C homolog 1	Putative RNA-binding protein. Acts as a negative regulator of Wnt signaling. May be involved in regulating gene expression during embryonic development. .			Cytoplasm	5.667	7.333	0	0
ITGA5	P08648	Integrin alpha-5	Integrin alpha-5/beta-1 is a receptor for fibronectin and fibrinogen. It recognizes the sequence R-G-D in its ligands. ITGA5:ITGB1 binds to PLA2G2A via a site which is distinct from the classical ligand-binding site and this induces integrin conformational changes and enhanced ligand binding to site 1 . ITGA5:ITGB1 acts as a receptor for fibrillin-1 and mediates R-G-D-dependent cell adhesion to F…	plasma_membrane	plasma_membrane	Cell membrane ; Single-pass type I membrane protein	0	7.333	8	0
CCT6A	P40227	T-complex protein 1 subunit zeta	Component of the chaperonin-containing T-complex , a molecular chaperone complex that assists the folding of proteins upon ATP hydrolysis . The TRiC complex mediates the folding of WRAP53/TCAB1, thereby regulating telomere maintenance . The TRiC complex plays a role in the folding of actin and tubulin . .	actin_cytoskeleton	actin_cytoskeleton	Cytoplasm	0	7.333	9.333	9
SLC1A5	Q15758	Neutral amino acid transporter B	Sodium-coupled antiporter of neutral amino acids. In a tri-substrate transport cycle, exchanges neutral amino acids between the extracellular and intracellular compartments, coupled to the inward cotransport of at least one sodium ion . The preferred substrate is the essential amino acid L-glutamine, a precursor for biosynthesis of proteins, nucleotides and amine sugars as well as an alternative …	plasma_membrane	plasma_membrane	Cell membrane ; Multi-pass membrane protein	12	7	5.333	0
EHBP1	Q8NDI1	EH domain-binding protein 1	May play a role in actin reorganization. Links clathrin-mediated endocytosis to the actin cytoskeleton. May act as Rab effector protein and play a role in vesicle trafficking . Required for perinuclear sorting and insulin-regulated recycling of SLC2A4/GLUT4 in adipocytes . .	cytosol	unclassified	Cytoplasm	0	6.667	0	0
FRMD6	Q96NE9	FERM domain-containing protein 6				Cytoplasm	0	6.667	0	0
CCT7	Q99832	T-complex protein 1 subunit eta	Component of the chaperonin-containing T-complex , a molecular chaperone complex that assists the folding of proteins upon ATP hydrolysis . The TRiC complex mediates the folding of WRAP53/TCAB1, thereby regulating telomere maintenance . The TRiC complex plays a role in the folding of actin and tubulin . .	actin_cytoskeleton	unclassified	Cytoplasm	0	6.667	0	0
MYO1E	Q12965	Unconventional myosin-Ie	Actin-based motor molecule with ATPase activity . Unconventional myosins serve in intracellular movements. Their highly divergent tails bind to membranous compartments, which are then moved relative to actin filaments. Binds to membranes containing anionic phospholipids via its tail domain. Involved in clathrin-mediated endocytosis and intracellular movement of clathrin-coated vesicles . Required…	cytosol	cytosol	Cytoplasm	0	6.667	0	0
TSG101	Q99816	Tumor susceptibility gene 101 protein	Component of the ESCRT-I complex, a regulator of vesicular trafficking process. Binds to ubiquitinated cargo proteins and is required for the sorting of endocytic ubiquitinated cargos into multivesicular bodies . Mediates the association between the ESCRT-0 and ESCRT-I complex. Required for completion of cytokinesis; the function requires CEP55. May be involved in cell growth and differentiation.…	cytosol	unclassified	Cytoplasm	0	6.667	0	0
LRRC40	Q9H9A6	Leucine-rich repeat-containing protein 40		cytosol	ERGIC		4.333	6.667	4.333	0
MINK1	Q8N4C8	Misshapen-like kinase 1	Serine/threonine kinase which acts as a negative regulator of Ras-related Rap2-mediated signal transduction to control neuronal structure and AMPA receptor trafficking. Required for normal synaptic density, dendrite complexity, as well as surface AMPA receptor expression in hippocampal neurons. Can activate the JNK and MAPK14/p38 pathways and mediates stimulation of the stress-activated protein k…	actin_cytoskeleton	plasma_membrane	Cytoplasm	8.667	6.667	6.333	0
ACSL4	O60488	Long-chain-fatty-acid--CoA ligase 4	Catalyzes the conversion of long-chain fatty acids to their active form acyl-CoA for both synthesis of cellular lipids, and degradation via beta-oxidation . Preferentially activates arachidonate and eicosapentaenoate as substrates . Preferentially activates 8,9-EET > 14,15-EET > 5,6-EET > 11,12-EET. Modulates glucose-stimulated insulin secretion by regulating the levels of unesterified EETs . Mod…	early_endosome	Golgi	Mitochondrion outer membrane ; Single-pass type III membrane protein	7.333	6.667	6.667	6.667
CDC37	Q16543	Hsp90 co-chaperone Cdc37	Co-chaperone that binds to numerous kinases and promotes their interaction with the Hsp90 complex, resulting in stabilization and promotion of their activity . Inhibits HSP90AA1 ATPase activity . .	cytosol	cytosol	Cytoplasm	0	6.333	0	0
TBC1D5	Q92609	TBC1 domain family member 5	May act as a GTPase-activating protein for Rab family protein. May act as a GAP for RAB7A. Can displace RAB7A and retromer CSC subcomplex from the endosomal membrane to the cytosol; at least retromer displacement seems to require its catalytic activity . Required for retrograde transport of cargo proteins from endosomes to the trans-Golgi network ; the function seems to require its catalytic acti…	trans-Golgi	early_endosome	Endosome membrane	0	6.333	0	0
DDX39A	O00148	ATP-dependent RNA helicase DDX39A	: Involved in pre-mRNA splicing. Required for the export of mRNA out of the nucleus. .	nucleus	nucleus	Nucleus	0	6.333	0	0
SRGAP1	Q7Z6B7	SLIT-ROBO Rho GTPase-activating protein 1	GTPase-activating protein for RhoA and Cdc42 small GTPases. Together with CDC42 seems to be involved in the pathway mediating the repulsive signaling of Robo and Slit proteins in neuronal migration. SLIT2, probably through interaction with ROBO1, increases the interaction of SRGAP1 with ROBO1 and inactivates CDC42. .	cytosol	cytosol		0	6.333	0	0
DIP2B	Q9P265	Disco-interacting protein 2 homolog B	Negatively regulates axonal outgrowth and is essential for normal synaptic transmission. Not required for regulation of axon polarity. Promotes acetylation of alpha-tubulin. .	plasma_membrane	unclassified	Cell projection, dendrite	0	6.333	1.667	0
ATP11C	Q8NB49	Phospholipid-transporting ATPase IG	Catalytic component of a P4-ATPase flippase complex which catalyzes the hydrolysis of ATP coupled to the transport of aminophospholipids, phosphatidylserines and phosphatidylethanolamines , from the outer to the inner leaflet of the plasma membrane . Major PS-flippase in immune cell subsets. In erythrocyte plasma membrane, it is required to maintain PS in the inner leaflet preventing its exposure…	plasma_membrane	plasma_membrane	Cell membrane ; Multi-pass membrane protein	5.333	6.333	0	0
SIPA1L1	O43166	Signal-induced proliferation-associated 1-like protein 1	Stimulates the GTPase activity of RAP2A. Promotes reorganization of the actin cytoskeleton and recruits DLG4 to F-actin. Contributes to the regulation of dendritic spine morphogenesis . .	actin_cytoskeleton	actin_cytoskeleton	Cytoplasm, cytoskeleton	5	6.333	5	0
GNAI3	P08754	Guanine nucleotide-binding protein G subunit alpha-3 alpha-3	Heterotrimeric guanine nucleotide-binding proteins function as transducers downstream of G protein-coupled receptors in numerous signaling cascades. The alpha chain contains the guanine nucleotide binding site and alternates between an active, GTP-bound state and an inactive, GDP-bound state. Signaling by an activated GPCR promotes GDP release and GTP binding. The alpha subunit has a low GTPase a…	plasma_membrane	plasma_membrane	Cytoplasm	7	6.333	5.333	0
AMOTL1	Q8IY63	Angiomotin-like protein 1	Inhibits the Wnt/beta-catenin signaling pathway, probably by recruiting CTNNB1 to recycling endosomes and hence preventing its translocation to the nucleus. .	actin_cytoskeleton	actin_cytoskeleton	Cell junction, tight junction	8.333	6.333	11	0
HPRT1	P00492	Hypoxanthine-guanine phosphoribosyltransferase	Converts guanine to guanosine monophosphate, and hypoxanthine to inosine monophosphate. Transfers the 5-phosphoribosyl group from 5-phosphoribosylpyrophosphate onto the purine. Plays a central role in the generation of purine nucleotides through the purine salvage pathway.	cytosol	unclassified	Cytoplasm	0	6	0	0
GLRX3	O76003	Glutaredoxin-3	Together with BOLA2, acts as a cytosolic iron-sulfur cluster assembly factor that facilitates cluster insertion into a subset of cytosolic proteins . Acts as a critical negative regulator of cardiac hypertrophy and a positive inotropic regulator . Required for hemoglobin maturation . Does not possess any thyoredoxin activity since it lacks the conserved motif that is essential for catalytic activ…	cytosol	unclassified	Cytoplasm, cytosol	0	6	0	0
CASK	O14936	Peripheral plasma membrane protein CASK	Multidomain scaffolding Mg-independent protein kinase that catalyzes the phosphotransfer from ATP to proteins such as NRXN1, and plays a role in synaptic transmembrane protein anchoring and ion channel trafficking . Contributes to neural development and regulation of gene expression via interaction with the transcription factor TBR1. Binds to cell-surface proteins, including amyloid precursor pro…	plasma_membrane	unclassified	Nucleus	5	6	0	0
AMPD2	Q01433	AMP deaminase 2	AMP deaminase plays a critical role in energy metabolism. Catalyzes the deamination of AMP to IMP and plays an important role in the purine nucleotide cycle. .	cytosol	cytosol		5.333	6	0	0
RIC8A	Q9NPQ8	Synembryn-A	Guanine nucleotide exchange factor , which can activate some, but not all, G-alpha proteins. Able to activate GNAI1, GNAO1 and GNAQ, but not GNAS by exchanging bound GDP for free GTP. Involved in regulation of microtubule pulling forces during mitotic movement of chromosomes by stimulating G-alpha protein, possibly leading to release G-alpha-GTP and NuMA proteins from the NuMA-GPSM2-G-alpha-GDP c…	cytosol	cytosol	Cytoplasm	3	6	3.333	0
PPP2R1A	P30153	Serine/threonine-protein phosphatase 2A 65 kDa regulatory subunit A alpha isoform	The PR65 subunit of protein phosphatase 2A serves as a scaffolding molecule to coordinate the assembly of the catalytic subunit and a variable regulatory B subunit. Upon interaction with GNA12 promotes dephosphorylation of microtubule associated protein TAU/MAPT . Required for proper chromosome segregation and for centromeric localization of SGO1 in mitosis . Together with RACK1 adapter, mediates…	cytosol	cytosol	Cytoplasm	6.667	6	0	0
CDC42EP1	Q00587	Cdc42 effector protein 1	Probably involved in the organization of the actin cytoskeleton. Induced membrane extensions in fibroblasts. .	plasma_membrane	unclassified	Endomembrane system ; Peripheral membrane protein	8	6	0	0
AFAP1	Q8N556	Actin filament-associated protein 1	Can cross-link actin filaments into both network and bundle structures . May modulate changes in actin filament integrity and induce lamellipodia formation. May function as an adapter molecule that links other proteins, such as SRC and PKC to the actin cytoskeleton. Seems to play a role in the development and progression of prostate adenocarcinoma by regulating cell-matrix adhesions and migration…	actin_cytoskeleton	actin_cytoskeleton	Cytoplasm, cytoskeleton, stress fiber	7	6	5.667	0
AMOT	Q4VCS5	Angiomotin	Plays a central role in tight junction maintenance via the complex formed with ARHGAP17, which acts by regulating the uptake of polarity proteins at tight junctions. Appears to regulate endothelial cell migration and tube formation. May also play a role in the assembly of endothelial cell-cell junctions. .	actin_cytoskeleton	actin_cytoskeleton	Cell junction, tight junction	9.333	6	10	14.33
PLCG1	P19174	1-phosphatidylinositol 4,5-bisphosphate phosphodiesterase gamma-1	Mediates the production of the second messenger molecules diacylglycerol and inositol 1,4,5-trisphosphate . Plays an important role in the regulation of intracellular signaling cascades. Becomes activated in response to ligand-mediated activation of receptor-type tyrosine kinases, such as PDGFRA, PDGFRB, EGFR, FGFR1, FGFR2, FGFR3 and FGFR4 . Plays a role in actin reorganization and cell migration…	cytosol	cytosol	Cell projection, lamellipodium	0	5.667	0	0
PGD	P52209	6-phosphogluconate dehydrogenase, decarboxylating	Catalyzes the oxidative decarboxylation of 6-phosphogluconate to ribulose 5-phosphate and CO, with concomitant reduction of NADP to NADPH. .	cytosol	cytosol	Cytoplasm	0	5.667	0	0
PFKL	P17858	ATP-dependent 6-phosphofructokinase, liver type	Catalyzes the phosphorylation of D-fructose 6-phosphate to fructose 1,6-bisphosphate by ATP, the first committing step of glycolysis . Negatively regulates the phagocyte oxidative burst in response to bacterial infection by controlling cellular NADPH biosynthesis and NADPH oxidase-derived reactive oxygen species. Upon macrophage activation, drives the metabolic switch toward glycolysis, thus prev…	cytosol	cytosol	Cytoplasm	0	5.667	0	0
SNX18	Q96RF0	Sorting nexin-18	Involved in endocytosis and intracellular vesicle trafficking, both during interphase and at the end of mitosis . Required for efficient progress through mitosis and cytokinesis . Required for normal formation of the cleavage furrow at the end of mitosis . Plays a role in endocytosis via clathrin-coated pits, but also clathrin-independent, actin-dependent fluid-phase endocytosis . Plays a role in…	actin_cytoskeleton	actin_cytoskeleton	Endomembrane system ; Peripheral membrane protein ; Cytoplasmic side	0	5.667	0	0
PSMD11	O00231	26S proteasome non-ATPase regulatory subunit 11	Component of the 26S proteasome, a multiprotein complex involved in the ATP-dependent degradation of ubiquitinated proteins. This complex plays a key role in the maintenance of protein homeostasis by removing misfolded or damaged proteins, which could impair cellular functions, and by removing proteins whose functions are no longer required. Therefore, the proteasome participates in numerous cell…	proteasome	cytosol	Nucleus	0	5.667	0	0
RAB11B	Q15907	Ras-related protein Rab-11B	The small GTPases Rab are key regulators of intracellular membrane trafficking, from the formation of transport vesicles to their fusion with membranes. Rabs cycle between an inactive GDP-bound form and an active GTP-bound form that is able to recruit to membranes different set of downstream effectors directly responsible for vesicle formation, movement, tethering and fusion. The small Rab GTPase…	recycling_endosome	unclassified	Recycling endosome membrane ; Lipid-anchor ; Cytoplasmic side	3.667	5.667	0	0
GDI2	P50395	Rab GDP dissociation inhibitor beta	GDP-dissociation inhibitor preventing the GDP to GTP exchange of most Rab proteins. By keeping these small GTPases in their inactive GDP-bound form regulates intracellular membrane trafficking . Negatively regulates protein transport to the cilium and ciliogenesis through the inhibition of RAB8A . .	early_endosome	cytosol	Cytoplasm	4.667	5.667	0	0
LLGL1	Q15334	Lethal giant larvae protein homolog 1	Cortical cytoskeleton protein found in a complex involved in maintaining cell polarity and epithelial integrity. Involved in the regulation of mitotic spindle orientation, proliferation, differentiation and tissue organization of neuroepithelial cells. Involved in axonogenesis through RAB10 activation thereby regulating vesicular membrane trafficking toward the axonal plasma membrane. .	plasma_membrane	unclassified	Early endosome membrane	5.333	5.667	0	0
GIPC1	O14908	PDZ domain-containing protein GIPC1	May be involved in G protein-linked signaling.	cytosol	unclassified	Cytoplasm	0	5.667	5.667	0
YAP1	P46937	Transcriptional coactivator YAP1	Transcriptional regulator which can act both as a coactivator and a corepressor and is the critical downstream regulatory target in the Hippo signaling pathway that plays a pivotal role in organ size control and tumor suppression by restricting proliferation and promoting apoptosis . The core of this pathway is composed of a kinase cascade wherein STK3/MST2 and STK4/MST1, in complex with its regu…	actin_cytoskeleton	unclassified	Cytoplasm	6	5.667	0	0
TKT	P29401	Transketolase	Catalyzes the transfer of a two-carbon ketol group from a ketose donor to an aldose acceptor, via a covalent intermediate with the cofactor thiamine pyrophosphate. .				0	5.667	6.667	0
CCT4	P50991	T-complex protein 1 subunit delta	Component of the chaperonin-containing T-complex , a molecular chaperone complex that assists the folding of proteins upon ATP hydrolysis . The TRiC complex mediates the folding of WRAP53/TCAB1, thereby regulating telomere maintenance . As part of the TRiC complex may play a role in the assembly of BBSome, a complex involved in ciliogenesis regulating transports vesicles to the cilia . The TRiC c…	actin_cytoskeleton	unclassified	Cytoplasm	0	5.667	7.667	0
DOK1	Q99704	Docking protein 1	DOK proteins are enzymatically inert adaptor or scaffolding proteins. They provide a docking platform for the assembly of multimolecular signaling complexes. DOK1 appears to be a negative regulator of the insulin signaling pathway. Modulates integrin activation by competing with talin for the same binding site on ITGB3. .	cytosol	cytosol	Cytoplasm	6.333	5.667	0	3.333
SRI	P30626	Sorcin	Calcium-binding protein that modulates excitation-contraction coupling in the heart. Contributes to calcium homeostasis in the heart sarcoplasmic reticulum. Modulates the activity of RYR2 calcium channels. .	cytosol	stress_granule	Cytoplasm	6.667	5.667	5.667	0
PLXNB2	O15031	Plexin-B2	Cell surface receptor for SEMA4C, SEMA4D and SEMA4G that plays an important role in cell-cell signaling . Plays a role in glutamatergic synapse development and is required for SEMA4A-mediated excitatory synapse development . Binding to class 4 semaphorins promotes downstream activation of RHOA and phosphorylation of ERBB2 at 'Tyr-1248' . Required for normal differentiation and migration of neuron…	plasma_membrane	plasma_membrane	Cell membrane ; Single-pass type I membrane protein	0	5.333	0	0
PACSIN2	Q9UNF0	Protein kinase C and casein kinase substrate in neurons protein 2	Regulates the morphogenesis and endocytosis of caveolae . Lipid-binding protein that is able to promote the tubulation of the phosphatidic acid-containing membranes it preferentially binds. Plays a role in intracellular vesicle-mediated transport. Involved in the endocytosis of cell-surface receptors like the EGF receptor, contributing to its internalization in the absence of EGF stimulus. .; Spe…	plasma_membrane	plasma_membrane	Cytoplasm	0	5.333	0	0
EPHB2	P29323	Ephrin type-B receptor 2	Receptor tyrosine kinase which binds promiscuously transmembrane ephrin-B family ligands residing on adjacent cells, leading to contact-dependent bidirectional signaling into neighboring cells. The signaling pathway downstream of the receptor is referred to as forward signaling while the signaling pathway downstream of the ephrin ligand is referred to as reverse signaling. Functions in axon guida…	plasma_membrane	plasma_membrane	Cell membrane; Single-pass type I membrane protein	0	5.333	1.667	0
KIAA1522	Q9P206	Uncharacterized protein KIAA1522		actin_cytoskeleton	plasma_membrane		0	5.333	1.667	0
EXOC4	Q96A65	Exocyst complex component 4	Component of the exocyst complex involved in the docking of exocytic vesicles with fusion sites on the plasma membrane. .	actin_cytoskeleton	unclassified	Midbody, Midbody ring	4	5.333	0	0
SNAP29	O95721	Synaptosomal-associated protein 29	SNAREs, soluble N-ethylmaleimide-sensitive factor-attachment protein receptors, are essential proteins for fusion of cellular membranes. SNAREs localized on opposing membranes assemble to form a trans-SNARE complex, an extended, parallel four alpha-helical bundle that drives membrane fusion. SNAP29 is a SNARE involved in autophagy through the direct control of autophagosome membrane fusion with t…	early_endosome	unclassified	Cytoplasm	0	5.333	0	5.333
PHACTR4	Q8IZ21	Phosphatase and actin regulator 4	Regulator of protein phosphatase 1 required for neural tube and optic fissure closure, and enteric neural crest cell migration during development. Acts as an activator of PP1 by interacting with PPP1CA and preventing phosphorylation of PPP1CA at 'Thr-320'. During neural tube closure, localizes to the ventral neural tube and activates PP1, leading to down-regulate cell proliferation within cranial…	actin_cytoskeleton	unclassified	Cytoplasm	0	5	0	0
HSPA12A	O43301	Heat shock 70 kDa protein 12A	Adapter protein for SORL1, but not SORT1. Delays SORL1 internalization and affects SORL1 subcellular localization. .	actin_cytoskeleton	actin_cytoskeleton	Cytoplasm	0	5	0	0
PAK2	Q13177	Serine/threonine-protein kinase PAK 2	Serine/threonine protein kinase that plays a role in a variety of different signaling pathways including cytoskeleton regulation, cell motility, cell cycle progression, apoptosis or proliferation . Acts as downstream effector of the small GTPases CDC42 and RAC1 . Activation by the binding of active CDC42 and RAC1 results in a conformational change and a subsequent autophosphorylation on several s…	cytosol	unclassified	Cytoplasm	0	5	0	0
IPO9	Q96P70	Importin-9	Nuclear transport receptor that mediates nuclear import of proteins, such as histones, proteasome and actin . Serves as receptor for nuclear localization signals in cargo substrates . Is thought to mediate docking of the importin/substrate complex to the nuclear pore complex through binding to nucleoporin and the complex is subsequently translocated through the pore by an energy requiring, Ran-de…	cytosol	unclassified	Cytoplasm	0	5	4	0
SLK	Q9H2G2	STE20-like serine/threonine-protein kinase	Mediates apoptosis and actin stress fiber dissolution. .	cytosol	actin_cytoskeleton	Cytoplasm	6.333	5	0	0
DOCK10	Q96BY6	Dedicator of cytokinesis protein 10	Guanine nucleotide-exchange factor that activates CDC42 and RAC1 by exchanging bound GDP for free GTP. Essential for dendritic spine morphogenesis in Purkinje cells and in hippocampal neurons, via a CDC42-mediated pathway. Sustains B-cell lymphopoiesis in secondary lymphoid tissues and regulates FCER2/CD23 expression. .			Nucleus	4.333	5	8.333	0
RPS7	P62081	Small ribosomal subunit protein eS7	Component of the small ribosomal subunit . The ribosome is a large ribonucleoprotein complex responsible for the synthesis of proteins in the cell . Required for rRNA maturation . Part of the small subunit processome, first precursor of the small eukaryotic ribosomal subunit. During the assembly of the SSU processome in the nucleolus, many ribosome biogenesis factors, an RNA chaperone and ribosom…	translation	stress_granule	Cytoplasm, cytoskeleton, microtubule organizing center, centrosome	0	5	7.667	7
PFAS	O15067	Phosphoribosylformylglycinamidine synthase	Phosphoribosylformylglycinamidine synthase involved in the purines biosynthetic pathway. Catalyzes the ATP-dependent conversion of formylglycinamide ribonucleotide and glutamine to yield formylglycinamidine ribonucleotide and glutamate. .	cytosol	cytosol	Cytoplasm	0	4.667	0	0
YWHAG	P61981	14-3-3 protein gamma	Adapter protein implicated in the regulation of a large spectrum of both general and specialized signaling pathways. Binds to a large number of partners, usually by recognition of a phosphoserine or phosphothreonine motif. Binding generally results in the modulation of the activity of the binding partner. .	14-3-3_scaffold	cytosol	Cytoplasm	0	4.667	0	0
MAPRE1	Q15691	Microtubule-associated protein RP/EB family member 1	Plus-end tracking protein that binds to the plus-end of microtubules and regulates the dynamics of the microtubule cytoskeleton . Promotes cytoplasmic microtubule nucleation and elongation . Involved in mitotic spindle positioning by stabilizing microtubules and promoting dynamic connection between astral microtubules and the cortex during mitotic chromosome segregation . Also acts as a regulator…	cytosol	unclassified	Cytoplasm, cytoskeleton	0	4.667	0	0
TPM2	P07951	Tropomyosin beta chain	Binds to actin filaments in muscle and non-muscle cells. Plays a central role, in association with the troponin complex, in the calcium dependent regulation of vertebrate striated muscle contraction. Smooth muscle contraction is regulated by interaction with caldesmon. In non-muscle cells is implicated in stabilizing cytoskeleton actin filaments. The non-muscle isoform may have a role in agonist-…			Cytoplasm, cytoskeleton	0	4.667	0	0
RAP1GDS1	P52306	Rap1 GTPase-GDP dissociation stimulator 1	Acts as a GEF for the Rho family of small GTP-binding proteins that stimulates the dissociation of GDP to enable subsequent binding of GTP . Additionally, appears to chaperone the processing and/or trafficking of small GTPases containing a C-terminal polybasic region independently of GEF activity . Targets include RAP1A/RAP1B, RHOA, RHOB, RHOC, RAC1 and KRAS . Regulates mitochondrial dynamics by …	cytosol	cytosol	Cytoplasm, cytosol	0	4.667	0	0
NFATC4	Q14934	Nuclear factor of activated T-cells, cytoplasmic 4	Ca-regulated transcription factor that is involved in several processes, including the development and function of the immune, cardiovascular, musculoskeletal, and nervous systems . Involved in T-cell activation, stimulating the transcription of cytokine genes, including that of IL2 and IL4 . Along with NFATC3, involved in embryonic heart development. Involved in mitochondrial energy metabolism r…	cytosol	cytosol	Cytoplasm, cytosol	0	4.667	0	0
OPTN	Q96CV9	Optineurin	Plays an important role in the maintenance of the Golgi complex, in membrane trafficking, in exocytosis, through its interaction with myosin VI and Rab8 . Links myosin VI to the Golgi complex and plays an important role in Golgi ribbon formation . Plays a role in the activation of innate immune response during viral infection. Mechanistically, recruits TBK1 at the Golgi apparatus, promoting its t…	cytosol	cytosol	Cytoplasm, perinuclear region	0	4.667	1.667	0
DNAJB4	Q9UDY4	DnaJ homolog subfamily B member 4	Probable chaperone. Stimulates ATP hydrolysis and the folding of unfolded proteins mediated by HSPA1A/B . .	cytosol	unclassified	Cytoplasm	2.333	4.667	0	0
JAK1	P23458	Tyrosine-protein kinase JAK1	Tyrosine kinase of the non-receptor type, involved in the IFN-alpha/beta/gamma signal pathway . Kinase partner for the interleukin -2 receptor as well as interleukin -10 receptor . Kinase partner for the type I interferon receptor IFNAR2 . In response to interferon-binding to IFNAR1-IFNAR2 heterodimer, phosphorylates and activates its binding partner IFNAR2, creating docking sites for STAT protei…	plasma_membrane	plasma_membrane	Endomembrane system; Peripheral membrane protein	5	4.667	0	0
CBL	P22681	E3 ubiquitin-protein ligase CBL	Adapter protein that functions as a negative regulator of many signaling pathways that are triggered by activation of cell surface receptors. Acts as an E3 ubiquitin-protein ligase, which accepts ubiquitin from specific E2 ubiquitin-conjugating enzymes, and then transfers it to substrates promoting their degradation by the proteasome . Ubiquitinates SPRY2 . Ubiquitinates EGFR . Recognizes activat…	cytosol	cytosol	Cytoplasm	6	4.667	0	0
ARAP1	Q96P48	Arf-GAP with Rho-GAP domain, ANK repeat and PH domain-containing protein 1	Phosphatidylinositol 3,4,5-trisphosphate-dependent GTPase-activating protein that modulates actin cytoskeleton remodeling by regulating ARF and RHO family members. Is activated by phosphatidylinositol 3,4,5-trisphosphate P3 binding. Can be activated by phosphatidylinositol 3,4-bisphosphate P2 binding, albeit with lower efficiency. Has a preference for ARF1 and ARF5 . .	cytosol	cytosol	Cytoplasm	0	4.333	0	0
COPE	O14579	Coatomer subunit epsilon	The coatomer is a cytosolic protein complex that binds to dilysine motifs and reversibly associates with Golgi non-clathrin-coated vesicles, which further mediate biosynthetic protein transport from the ER, via the Golgi up to the trans Golgi network. The coatomer complex is required for budding from Golgi membranes, and is essential for the retrograde Golgi-to-ER transport of dilysine-tagged pro…	ERGIC	ERGIC	Cytoplasm	0	4.333	0	0
SEC31A	O94979	Protein transport protein Sec31A	Component of the coat protein complex II which promotes the formation of transport vesicles from the endoplasmic reticulum . The coat has two main functions, the physical deformation of the endoplasmic reticulum membrane into vesicles and the selection of cargo molecules . .	ERGIC	ERGIC	Cytoplasm	0	4.333	0	0
PCMT1	P22061	Protein-L-isoaspartate O-methyltransferase	Initiates the repair of damaged proteins by catalyzing methyl esterification of L-isoaspartyl and D-aspartyl residues produced by spontaneous isomerization and racemization of L-aspartyl and L-asparaginyl residues in aging peptides and proteins . Acts on EIF4EBP2, microtubule-associated protein 2, calreticulin, clathrin light chains a and b, Ubiquitin C-terminal hydrolase isozyme L1, phosphatidyl…	unclassified	cytosol	Cytoplasm, cytosol	0	4.333	0	0
STXBP3	O00186	Syntaxin-binding protein 3	Together with STX4 and VAMP2, may play a role in insulin-dependent movement of GLUT4 and in docking/fusion of intracellular GLUT4-containing vesicles with the cell surface in adipocytes. .	plasma_membrane	plasma_membrane	Cytoplasm, cytosol	0	4.333	0	0
DDOST	P39656	Dolichyl-diphosphooligosaccharide--protein glycosyltransferase 48 kDa subunit	Subunit of the oligosaccharyl transferase complex that catalyzes the initial transfer of a defined glycan ManGlcNAc in eukaryotes from the lipid carrier dolichol-pyrophosphate to an asparagine residue within an Asn-X-Ser/Thr consensus motif in nascent polypeptide chains, the first step in protein N-glycosylation . N-glycosylation occurs cotranslationally and the complex associates with the Sec61 …	ER	ER	Endoplasmic reticulum membrane ; Single-pass type I membrane protein	0	4.333	0	0
ANKLE2	Q86XL3	Ankyrin repeat and LEM domain-containing protein 2	Involved in mitotic nuclear envelope reassembly by promoting dephosphorylation of BAF/BANF1 during mitotic exit . Coordinates the control of BAF/BANF1 dephosphorylation by inhibiting VRK1 kinase and promoting dephosphorylation of BAF/BANF1 by protein phosphatase 2A , thereby facilitating nuclear envelope assembly . May regulate nuclear localization of VRK1 in non-dividing cells . It is unclear wh…	ER	ER	Endoplasmic reticulum membrane ; Single-pass type III membrane protein	0	4.333	0	0
SNX1	Q13596	Sorting nexin-1	Involved in several stages of intracellular trafficking. Interacts with membranes containing phosphatidylinositol 3-phosphate or phosphatidylinositol 3,5-bisphosphate P2 . Acts in part as component of the retromer membrane-deforming SNX-BAR subcomplex. The SNX-BAR retromer mediates retrograde transport of cargo proteins from endosomes to the trans-Golgi network and is involved in endosome-to-plas…	early_endosome	early_endosome	Endosome membrane ; Peripheral membrane protein; Cytoplasmic side	0	4.333	0	0
PLXNA1	Q9UIW2	Plexin-A1	Coreceptor for SEMA3A, SEMA3C, SEMA3F and SEMA6D. Necessary for signaling by class 3 semaphorins and subsequent remodeling of the cytoskeleton. Plays a role in axon guidance, invasive growth and cell migration. Class 3 semaphorins bind to a complex composed of a neuropilin and a plexin. The plexin modulates the affinity of the complex for specific semaphorins, and its cytoplasmic domain is requir…	plasma_membrane	plasma_membrane	Cell membrane ; Single-pass type I membrane protein	0	4.333	1.667	0
CDC42BPA	Q5VT25	Serine/threonine-protein kinase MRCK alpha	Serine/threonine-protein kinase which is an important downstream effector of CDC42 and plays a role in the regulation of cytoskeleton reorganization and cell migration . Regulates actin cytoskeletal reorganization via phosphorylation of PPP1R12C and MYL9/MLC2 . In concert with MYO18A and LURAP1, is involved in modulating lamellar actomyosin retrograde flow that is crucial to cell protrusion and m…	actin_cytoskeleton	plasma_membrane	Cytoplasm	0	4.333	1.667	0
PTPRF	P10586	Receptor-type tyrosine-protein phosphatase F	Possible cell adhesion receptor. It possesses an intrinsic protein tyrosine phosphatase activity and dephosphorylates EPHA2 regulating its activity.; The first PTPase domain has enzymatic activity, while the second one seems to affect the substrate specificity of the first one.	plasma_membrane	plasma_membrane	Membrane; Single-pass type I membrane protein	0	4.333	3	0
NECTIN2	Q92692	Nectin-2	Modulator of T-cell signaling. Can be either a costimulator of T-cell function, or a coinhibitor, depending on the receptor it binds to. Upon binding to CD226, stimulates T-cell proliferation and cytokine production, including that of IL2, IL5, IL10, IL13, and IFNG. Upon interaction with PVRIG, inhibits T-cell proliferation. These interactions are competitive . Probable cell adhesion protein . .;…	plasma_membrane	plasma_membrane	Cell membrane; Single-pass type I membrane protein	0	4.333	3.667	0
TBC1D17	Q9HA65	TBC1 domain family member 17	Probable RAB GTPase-activating protein that inhibits RAB8A/B function. Reduces Rab8 recruitment to tubules emanating from the endocytic recycling compartment and inhibits Rab8-mediated endocytic trafficking, such as that of transferrin receptor . Involved in regulation of autophagy. .	cytosol	cytosol	Cytoplasmic vesicle, autophagosome	4	4.333	0	0
ATP5F1C	P36542	ATP synthase subunit gamma, mitochondrial	Mitochondrial membrane ATP synthase F ATP synthase or Complex V produces ATP from ADP in the presence of a proton gradient across the membrane which is generated by electron transport complexes of the respiratory chain. F-type ATPases consist of two structural domains, F - containing the extramembraneous catalytic core, and F - containing the membrane proton channel, linked together by a central …	mitochondrion	nucleus	Mitochondrion inner membrane ; Peripheral membrane protein ; Matrix side	4.667	4.333	0	0
COBLL1	Q53SF7	Cordon-bleu protein-like 1		unclassified	unclassified		4.667	4.333	0	0
RALB	P11234	Ras-related protein Ral-B	Multifunctional GTPase involved in a variety of cellular processes including gene expression, cell migration, cell proliferation, oncogenic transformation and membrane trafficking . Accomplishes its multiple functions by interacting with distinct downstream effectors. Acts as a GTP sensor for GTP-dependent exocytosis of dense core vesicles . Required both to stabilize the assembly of the exocyst …	plasma_membrane	plasma_membrane	Cell membrane ; Lipid-anchor ; Cytoplasmic side	0	4.333	0	5.333
CDC42	P60953	Cell division control protein 42 homolog	Plasma membrane-associated small GTPase which cycles between an active GTP-bound and an inactive GDP-bound state. In active state binds to a variety of effector proteins to regulate cellular responses. Involved in epithelial cell polarization processes. Regulates the bipolar attachment of spindle microtubules to kinetochores before chromosome congression in metaphase . Regulates cell migration . …	plasma_membrane	unclassified	Cell membrane ; Lipid-anchor ; Cytoplasmic side	2.667	4.333	0	2.667
NQO1	P15559	NAD(P)H dehydrogenase [quinone] 1	Flavin-containing quinone reductase that catalyzes two-electron reduction of quinones to hydroquinones using either NADH or NADPH as electron donors. In a ping-pong kinetic mechanism, the electrons are sequentially transferred from NADH to flavin cofactor and then from reduced flavin to the quinone, bypassing the formation of semiquinone and reactive oxygen species . Regulates cellular redox stat…	cytosol	cytosol	Cytoplasm, cytosol	0	4.333	3.667	3.333
PPP2R5D	Q14738	Serine/threonine-protein phosphatase 2A 56 kDa regulatory subunit delta isoform	The B regulatory subunit might modulate substrate selectivity and catalytic activity, and also might direct the localization of the catalytic enzyme to a particular subcellular compartment.	cytosol	unclassified	Cytoplasm	0	4	0	0
SBF1	O95248	Myotubularin-related protein 5	Acts as an adapter for the phosphatase MTMR2 to regulate MTMR2 catalytic activity and subcellular location . May function as a guanine nucleotide exchange factor activating RAB28 . Promotes the exchange of GDP to GTP, converting inactive GDP-bound Rab proteins into their active GTP-bound form . Inhibits myoblast differentiation in vitro and induces oncogenic transformation in fibroblasts . .	unclassified	unclassified	Cytoplasm	0	4	0	0
ATG7	O95352	Ubiquitin-like modifier-activating enzyme ATG7	E1-like activating enzyme involved in the 2 ubiquitin-like systems required for cytoplasm to vacuole transport and autophagy. Activates ATG12 for its conjugation with ATG5 as well as the ATG8 family proteins for their conjugation with phosphatidylethanolamine. Both systems are needed for the ATG8 association to Cvt vesicles and autophagosomes membranes. Required for autophagic death induced by ca…	cytosol	cytosol	Cytoplasm	0	4	0	0
SPATS2L	Q9NUQ6	SPATS2-like protein		translation	translation	Cytoplasm	0	4	0	0
ACTR3	P61158	Actin-related protein 3	ATP-binding component of the Arp2/3 complex, a multiprotein complex that mediates actin polymerization upon stimulation by nucleation-promoting factor . The Arp2/3 complex mediates the formation of branched actin networks in the cytoplasm, providing the force for cell motility . Seems to contact the pointed end of the daughter actin filament . In podocytes, required for the formation of lamellipo…	actin_cytoskeleton	actin_cytoskeleton	Cytoplasm, cytoskeleton	0	4	0	0
BLVRA	P53004	Biliverdin reductase A	Reduces the gamma-methene bridge of the open tetrapyrrole, biliverdin IX alpha, to bilirubin with the concomitant oxidation of a NADH or NADPH cofactor . Uses the reactants NADH or NADPH depending on the pH; NADH is used at the acidic pH range and NADPH at the alkaline range . NADPH, however, is the probable reactant in biological systems . .	cytosol	unclassified	Cytoplasm, cytosol	0	4	0	0
SNX2	O60749	Sorting nexin-2	Involved in several stages of intracellular trafficking. Interacts with membranes containing phosphatidylinositol 3-phosphate or phosphatidylinositol 3,5-bisphosphate P2 . Acts in part as component of the retromer membrane-deforming SNX-BAR subcomplex . The SNX-BAR retromer mediates retrograde transport of cargo proteins from endosomes to the trans-Golgi network and is involved in endosome-to-pla…	early_endosome	early_endosome	Early endosome membrane ; Peripheral membrane protein ; Cytoplasmic side	0	4	0	0
HACD3	Q9P035	Very-long-chain -3-hydroxyacyl-CoA dehydratase 3	Catalyzes the third of the four reactions of the long-chain fatty acids elongation cycle. This endoplasmic reticulum-bound enzymatic process, allows the addition of two carbons to the chain of long- and very long-chain fatty acids/VLCFAs per cycle. This enzyme catalyzes the dehydration of the 3-hydroxyacyl-CoA intermediate into trans-2,3-enoyl-CoA, within each cycle of fatty acid elongation. Ther…	ER	ER	Endoplasmic reticulum membrane ; Multi-pass membrane protein	0	4	0	0
SLC25A11	Q02978	Mitochondrial 2-oxoglutarate/malate carrier protein	Catalyzes the transport of 2-oxoglutarate across the inner mitochondrial membrane in an electroneutral exchange for malate. Can also exchange 2-oxoglutarate for other dicarboxylic acids such as malonate, succinate, maleate and oxaloacetate, although with lower affinity. Contributes to several metabolic processes, including the malate-aspartate shuttle, the oxoglutarate/isocitrate shuttle, in gluc…	mitochondrion	mitochondrion	Mitochondrion inner membrane ; Multi-pass membrane protein	0	4	0	0
NSFL1C	Q9UNZ2	NSFL1 cofactor p47	Reduces the ATPase activity of VCP . Necessary for the fragmentation of Golgi stacks during mitosis and for VCP-mediated reassembly of Golgi stacks after mitosis . May play a role in VCP-mediated formation of transitional endoplasmic reticulum . Inhibits the activity of CTSL . Together with UBXN2B/p37, regulates the centrosomal levels of kinase AURKA/Aurora A during mitotic progression by promoti…	cytosol	unclassified	Nucleus	0	4	0	0
LUC7L3	O95232	Luc7-like protein 3	Binds cAMP regulatory element DNA sequence. May play a role in RNA splicing. .	nucleus	centrosome	Nucleus speckle	0	4	0	0
SRM	P19623	Spermidine synthase	Catalyzes the production of spermidine from putrescine and decarboxylated S-adenosylmethionine . Has a strong preference for putrescine as substrate, and has very low activity towards 1,3-diaminopropane. Has extremely low activity towards spermidine. .	cytosol	unclassified		0	4	0	0
EPN1	Q9Y6I3	Epsin-1	Binds to membranes enriched in phosphatidylinositol 4,5-bisphosphate P2. Modifies membrane curvature and facilitates the formation of clathrin-coated invaginations . Regulates receptor-mediated endocytosis . .	actin_cytoskeleton	actin_cytoskeleton	Cytoplasm	1.667	4	0	0
SLC12A2	P55011	Solute carrier family 12 member 2 -chloride cotransporter 2	Cation-chloride cotransporter which mediates the electroneutral transport of chloride, potassium and/or sodium ions across the membrane . Plays a vital role in the regulation of ionic balance and cell volume . .	plasma_membrane	plasma_membrane	Basolateral cell membrane ; Multi-pass membrane protein	4.333	4	0	0
MPP1	Q00013	55 kDa erythrocyte membrane protein	Essential regulator of neutrophil polarity. Regulates neutrophil polarization by regulating AKT1 phosphorylation through a mechanism that is independent of PIK3CG activity . .	plasma_membrane	actin_cytoskeleton	Cell membrane ; Lipid-anchor	4.667	4	0	0
GNAQ	P50148	Guanine nucleotide-binding protein G subunit alpha	Guanine nucleotide-binding proteins are involved as modulators or transducers in various transmembrane signaling systems. Required for platelet activation. Regulates B-cell selection and survival and is required to prevent B-cell-dependent autoimmunity. Regulates chemotaxis of BM-derived neutrophils and dendritic cells . Transduces FFAR4 signaling in response to long-chain fatty acids . Together …	plasma_membrane	plasma_membrane	Cell membrane ; Lipid-anchor	0	4	0	5
PALM2	Q8IXS6	Paralemmin-2		unclassified	plasma_membrane	Cell membrane ; Lipid-anchor ; Cytoplasmic side	0	4	5	0
GNAI2	P04899	Guanine nucleotide-binding protein G subunit alpha-2	Guanine nucleotide-binding proteins are involved as modulators or transducers in various transmembrane signaling systems. The G proteins are involved in hormonal regulation of adenylate cyclase: they inhibit the cyclase in response to beta-adrenergic stimuli. May play a role in cell division. .; : Regulates the cell surface density of dopamine receptors DRD2 by sequestrating them as an intracellu…	plasma_membrane	plasma_membrane	Cytoplasm	0	4	0	6.333
RIPK2	O43353	Receptor-interacting serine/threonine-protein kinase 2	Serine/threonine/tyrosine-protein kinase that plays an essential role in modulation of innate and adaptive immune responses . Acts as a key effector of NOD1 and NOD2 signaling pathways: upon activation by bacterial peptidoglycans, NOD1 and NOD2 oligomerize and recruit RIPK2 via CARD-CARD domains, leading to the formation of RIPK2 filaments . Once recruited, RIPK2 autophosphorylates and undergoes …	cytosol	cytosol	Cytoplasm	6.333	4	0	0
EHD4	Q9H223	EH domain-containing protein 4	ATP- and membrane-binding protein that probably controls membrane reorganization/tubulation upon ATP hydrolysis. Plays a role in early endosomal transport. .	plasma_membrane	unclassified	Early endosome membrane ; Peripheral membrane protein ; Cytoplasmic side	5	4	3	0
TUBB3	Q13509	Tubulin beta-3 chain	Tubulin is the major constituent of microtubules, a cylinder consisting of laterally associated linear protofilaments composed of alpha- and beta-tubulin heterodimers . Microtubules grow by the addition of GTP-tubulin dimers to the microtubule end, where a stabilizing cap forms . Below the cap, tubulin dimers are in GDP-bound state, owing to GTPase activity of alpha-tubulin . TUBB3 plays a critic…	cytosol	cytosol	Cytoplasm, cytoskeleton	0	4	9.333	5.667
PARK7	Q99497	Parkinson disease protein 7	Multifunctional protein with controversial molecular function which plays an important role in cell protection against oxidative stress and cell death acting as oxidative stress sensor and redox-sensitive chaperone and protease . It is involved in neuroprotective mechanisms like the stabilization of NFE2L2 and PINK1 proteins, male fertility as a positive regulator of androgen signaling pathway as…	unclassified	Golgi	Cell membrane ; Lipid-anchor	0	3.667	0	0
ABCC1	P33527	Multidrug resistance-associated protein 1 transporter	Mediates export of organic anions and drugs from the cytoplasm . Mediates ATP-dependent transport of glutathione and glutathione conjugates, leukotriene C4, estradiol-17-beta-o-glucuronide, methotrexate, antiviral drugs and other xenobiotics . Confers resistance to anticancer drugs by decreasing accumulation of drug in cells, and by mediating ATP- and GSH-dependent drug export . Hydrolyzes ATP wi…	plasma_membrane	plasma_membrane	Cell membrane ; Multi-pass membrane protein	0	3.667	0	0
AK1	P00568	Adenylate kinase isoenzyme 1	Catalyzes the reversible transfer of the terminal phosphate group between ATP and AMP . Exhibits nucleoside diphosphate kinase activity, catalyzing the production of ATP, CTP, GTP, UTP, dATP, dCTP, dGTP and dTTP from the corresponding diphosphate substrates with either ATP or GTP as phosphate donor . Also catalyzes at a very low rate the synthesis of thiamine triphosphate from thiamine diphosphat…	cytosol	unclassified	Cytoplasm	0	3.667	0	0
CSK	P41240	Tyrosine-protein kinase CSK	Non-receptor tyrosine-protein kinase that plays an important role in the regulation of cell growth, differentiation, migration and immune response. Phosphorylates tyrosine residues located in the C-terminal tails of Src-family kinases including LCK, SRC, HCK, FYN, LYN, CSK or YES1. Upon tail phosphorylation, Src-family members engage in intramolecular interactions between the phosphotyrosine tail…	cytosol	actin_cytoskeleton	Cytoplasm	0	3.667	0	0
ARHGEF1	Q92888	Rho guanine nucleotide exchange factor 1	Seems to play a role in the regulation of RhoA GTPase by guanine nucleotide-binding alpha-12 and alpha-13 subunits . Acts as GTPase-activating protein for GNA12 and GNA13, and as guanine nucleotide exchange factor for RhoA GTPase . Activated G alpha 13/GNA13 stimulates the RhoGEF activity through interaction with the RGS-like domain . This GEF activity is inhibited by binding to activated GNA12 .…	unclassified	unclassified	Cytoplasm	0	3.667	0	0
EXOC7	Q9UPT5	Exocyst complex component 7	Component of the exocyst complex involved in the docking of exocytic vesicles with fusion sites on the plasma membrane. In adipocytes, plays a crucial role in targeting SLC2A4 vesicle to the plasma membrane in response to insulin, perhaps directing the vesicle to the precise site of fusion . It is required for neuron survival and plays an essential role in cortical development . .	actin_cytoskeleton	unclassified	Cytoplasm, cytosol	0	3.667	0	0
DCBLD2	Q96PD2	Discoidin, CUB and LCCL domain-containing protein 2		plasma_membrane	plasma_membrane	Membrane ; Single-pass type I membrane protein	0	3.667	0	0
BCR	P11274	Breakpoint cluster region protein	Protein with a unique structure having two opposing regulatory activities toward small GTP-binding proteins. The C-terminus is a GTPase-activating protein domain which stimulates GTP hydrolysis by RAC1, RAC2 and CDC42. Accelerates the intrinsic rate of GTP hydrolysis of RAC1 or CDC42, leading to down-regulation of the active GTP-bound form . The central Dbl homology domain functions as guanine nu…	cytosol	unclassified	Postsynaptic density	0	3.667	0	0
SRR	Q9GZT4	Serine racemase	Catalyzes the synthesis of D-serine from L-serine. D-serine is a key coagonist with glutamate at NMDA receptors. Has dehydratase activity towards both L-serine and D-serine. .	cytosol	cytosol		0	3.667	0	0
DNAAF5	Q86Y56	Dynein axonemal assembly factor 5	Cytoplasmic protein involved in the delivery of the dynein machinery to the motile cilium. It is required for the assembly of the axonemal dynein inner and outer arms, two structures attached to the peripheral outer doublet A microtubule of the axoneme, that play a crucial role in cilium motility. .	cytosol	unclassified	Cytoplasm	2.333	3.667	0	0
PRMT3	O60678	Protein arginine N-methyltransferase 3	Protein-arginine N-methyltransferase that catalyzes both the monomethylation and asymmetric dimethylation of the guanidino nitrogens of arginine residues in target proteins, and therefore falls into the group of type I methyltransferases . May regulate retinoic acid synthesis and signaling by inhibiting ALDH1A1 retinal dehydrogenase activity . .	unclassified	cytosol	Cytoplasm	3	3.667	0	0
DNAJA2	O60884	DnaJ homolog subfamily A member 2	Co-chaperone of Hsc70. Stimulates ATP hydrolysis and the folding of unfolded proteins mediated by HSPA1A/B . .	unclassified	unclassified	Membrane ; Lipid-anchor	3.667	3.667	0	0
ARF6	P62330	ADP-ribosylation factor 6	GTP-binding protein involved in protein trafficking that regulates endocytic recycling and cytoskeleton remodeling . Required for normal completion of mitotic cytokinesis . Plays a role in the reorganization of the actin cytoskeleton and the formation of stress fibers . Involved in the regulation of dendritic spine development, contributing to the regulation of dendritic branching and filopodia e…	plasma_membrane	unclassified	Cytoplasm, cytosol	0	3.667	4	0
VPS37B	Q9H9H4	Vacuolar protein sorting-associated protein 37B	Component of the ESCRT-I complex, a regulator of vesicular trafficking process. Required for the sorting of endocytic ubiquitinated cargos into multivesicular bodies. May be involved in cell growth and differentiation. .	plasma_membrane	unclassified	Late endosome membrane ; Peripheral membrane protein	4.667	3.667	0	0
ABI1	Q8IZP0	Abl interactor 1	May act in negative regulation of cell growth and transformation by interacting with nonreceptor tyrosine kinases ABL1 and/or ABL2. May play a role in regulation of EGF-induced Erk pathway activation. Involved in cytoskeletal reorganization and EGFR signaling. Together with EPS8 participates in transduction of signals from Ras to Rac. In vitro, a trimeric complex of ABI1, EPS8 and SOS1 exhibits R…	actin_cytoskeleton	unclassified	Cytoplasm	3.333	3.667	2.667	0
RAP2B	P61225	Ras-related protein Rap-2b	Small GTP-binding protein which cycles between a GDP-bound inactive and a GTP-bound active form. Involved in EGFR and CHRM3 signaling pathways through stimulation of PLCE1. May play a role in cytoskeletal rearrangements and regulate cell spreading through activation of the effector TNIK. May regulate membrane vesiculation in red blood cells. .	plasma_membrane	plasma_membrane	Recycling endosome membrane ; Lipid-anchor ; Cytoplasmic side	3.667	3.667	0	2.667
PPP1R9B	Q96SB3	Neurabin-2	Seems to act as a scaffold protein in multiple signaling pathways. Modulates excitatory synaptic transmission and dendritic spine morphology. Binds to actin filaments and shows cross-linking activity. Binds along the sides of the F-actin. May play an important role in linking the actin cytoskeleton to the plasma membrane at the synaptic junction. Believed to target protein phosphatase 1/PP1 to de…	plasma_membrane	actin_cytoskeleton	Cytoplasm, cytoskeleton	2.667	3.667	1.667	2.333
SLC4A7	Q9Y6M7	Sodium bicarbonate cotransporter 3 cotransporter	Electroneutral sodium- and bicarbonate-dependent cotransporter with a Na:HCO3 1:1 stoichiometry . Mediates the sodium-dependent bicarbonate transport important for pH recovery after acid load as well as for regulation of steady-state pH in the duodenum and vascular smooth muscle cells . Plays a key role in macrophage acidification, mediating bicarbonate import into the cytoplasm which is crucial …	plasma_membrane	plasma_membrane	Basolateral cell membrane ; Multi-pass membrane protein	3.333	3.667	4.333	4
RAB2B	Q8WUD1	Ras-related protein Rab-2B	The small GTPases Rab are key regulators of intracellular membrane trafficking, from the formation of transport vesicles to their fusion with membranes. Rabs cycle between active GTP-bound and inactive GDP-bound states. In their active state, drive transport of vesicular carriers from donor organelles to acceptor organelles to regulate the membrane traffic that maintains organelle identity and mo…	trans-Golgi	ERGIC	Cell membrane ; Lipid-anchor ; Cytoplasmic side	0	3.333	0	0
CRK	P46108	Adapter molecule crk	Involved in cell branching and adhesion mediated by BCAR1-CRK-RAPGEF1 signaling and activation of RAP1. .; : Regulates cell adhesion, spreading and migration . Mediates attachment-induced MAPK8 activation, membrane ruffling and cell motility in a Rac-dependent manner. Involved in phagocytosis of apoptotic cells and cell motility via its interaction with DOCK1 and DOCK4 . May regulate the EFNA5-EP…	cytosol	cytosol	Cytoplasm	0	3.333	0	0
DDX19A	Q9NUU7	ATP-dependent RNA helicase DDX19A	ATP-dependent RNA helicase involved in mRNA export from the nucleus. Rather than unwinding RNA duplexes, DDX19 functions as a remodeler of ribonucleoprotein particles, whereby proteins bound to nuclear mRNA are dissociated and replaced by cytoplasmic mRNA binding proteins. .	unclassified	unclassified	Cytoplasm	0	3.333	0	0
NUMBL	Q9Y6R0	Numb-like protein	Plays a role in the process of neurogenesis. Required throughout embryonic neurogenesis to maintain neural progenitor cells, also called radial glial cells , by allowing their daughter cells to choose progenitor over neuronal cell fate. Not required for the proliferation of neural progenitor cells before the onset of embryonic neurogenesis. Also required postnatally in the subventricular zone neu…	actin_cytoskeleton	plasma_membrane	Cytoplasm	0	3.333	0	0
WDR6	Q9NNW5	tRNA -methyltransferase regulator WDR6	Together with methyltransferase FTSJ1, methylates the 2'-O-ribose of nucleotides at position 34 of the tRNA anticodon loop of substrate tRNAs . Required for the correct positioning of the substrate tRNA for methylation . Required to suppress amino acid starvation-induced autophagy . Enhances the STK11/LKB1-induced cell growth suppression activity . .	plasma_membrane	unclassified	Cytoplasm	0	3.333	0	0
TPM1	P09493	Tropomyosin alpha-1 chain	Binds to actin filaments in muscle and non-muscle cells . Plays a central role, in association with the troponin complex, in the calcium dependent regulation of vertebrate striated muscle contraction . Smooth muscle contraction is regulated by interaction with caldesmon. In non-muscle cells is implicated in stabilizing cytoskeleton actin filaments.	cytosol	unclassified	Cytoplasm, cytoskeleton	0	3.333	0	0
WASF1	Q92558	Actin-binding protein WASF1	Downstream effector molecule involved in the transmission of signals from tyrosine kinase receptors and small GTPases to the actin cytoskeleton. Promotes formation of actin filaments. Part of the WAVE complex that regulates lamellipodia formation . The WAVE complex regulates actin filament reorganization via its interaction with the Arp2/3 complex . As component of the WAVE1 complex, required for…	actin_cytoskeleton	unclassified	Cytoplasm, cytoskeleton	0	3.333	0	0
STXBP1	P61764	Syntaxin-binding protein 1	Participates in the regulation of synaptic vesicle docking and fusion through interaction with GTP-binding proteins . Essential for neurotransmission and binds syntaxin, a component of the synaptic vesicle fusion machinery probably in a 1:1 ratio. Can interact with syntaxins 1, 2, and 3 but not syntaxin 4. Involved in the release of neurotransmitters from neurons through interacting with SNARE co…	plasma_membrane	plasma_membrane	Cytoplasm, cytosol	0	3.333	0	0
PALS2	Q9NZW5	Protein PALS2		plasma_membrane	plasma_membrane	Membrane ; Peripheral membrane protein	0	3.333	0	0
FCHO2	Q0JRZ9	F-BAR domain only protein 2	Functions in an early step of clathrin-mediated endocytosis. Has both a membrane binding/bending activity and the ability to recruit proteins essential to the formation of functional clathrin-coated pits. Has a lipid-binding activity with a preference for membranes enriched in phosphatidylserine and phosphoinositides biphosphate like the plasma membrane. Its membrane-bending activity might be imp…	actin_cytoskeleton	actin_cytoskeleton	Membrane, clathrin-coated pit ; Peripheral membrane protein ; Cytoplasmic side	0	3.333	0	0
PLCB1	Q9NQ66	1-phosphatidylinositol 4,5-bisphosphate phosphodiesterase beta-1	Catalyzes the hydrolysis of 1-phosphatidylinositol 4,5-bisphosphate into diacylglycerol and inositol 1,4,5-trisphosphate and mediates intracellular signaling downstream of G protein-coupled receptors . Regulates the function of the endothelial barrier. .	plasma_membrane	plasma_membrane	Nucleus membrane	0	3.333	0	0
COTL1	Q14019	Coactosin-like protein	Binds to F-actin in a calcium-independent manner. Has no direct effect on actin depolymerization. Acts as a chaperone for ALOX5 , influencing both its stability and activity in leukotrienes synthesis. .	cytosol	unclassified	Cytoplasm	0	3.333	1.667	0
GDI1	P31150	Rab GDP dissociation inhibitor alpha	Regulates the GDP/GTP exchange reaction of most Rab proteins by inhibiting the dissociation of GDP from them, and the subsequent binding of GTP to them. Promotes the dissociation of GDP-bound Rab proteins from the membrane and inhibits their activation. Promotes the dissociation of RAB1A, RAB3A, RAB5A and RAB10 from membranes. .	early_endosome	cytosol	Cytoplasm	3.333	3.333	0	0
RSL1D1	O76021	Ribosomal L1 domain-containing protein 1	Regulates cellular senescence through inhibition of PTEN translation. Acts as a pro-apoptotic regulator in response to DNA damage. .	nucleolus	nucleus	Nucleus, nucleolus	2.333	3.333	0	2.333	7.999
WASF2	Q9Y6W5	Actin-binding protein WASF2	Downstream effector molecule involved in the transmission of signals from tyrosine kinase receptors and small GTPases to the actin cytoskeleton. Promotes formation of actin filaments. Part of the WAVE complex that regulates lamellipodia formation. The WAVE complex regulates actin filament reorganization via its interaction with the Arp2/3 complex. .	actin_cytoskeleton	plasma_membrane	Cytoplasm, cytoskeleton	3	3.333	2.667	0
EFNB1	P98172	Ephrin-B1	Cell surface transmembrane ligand for Eph receptors, a family of receptor tyrosine kinases which are crucial for migration, repulsion and adhesion during neuronal, vascular and epithelial development . Binding to Eph receptors residing on adjacent cells leads to contact-dependent bidirectional signaling into neighboring cells . Shows high affinity for the receptor tyrosine kinase EPHB1/ELK . Can …	plasma_membrane	plasma_membrane	Cell membrane ; Single-pass type I membrane protein	0	3	0	0
AKR1B1	P15121	Aldo-keto reductase family 1 member B1	Catalyzes the NADPH-dependent reduction of a wide variety of carbonyl-containing compounds to their corresponding alcohols. Displays enzymatic activity towards endogenous metabolites such as aromatic and aliphatic aldehydes, ketones, monosacharides, bile acids and xenobiotics substrates. Key enzyme in the polyol pathway, catalyzes reduction of glucose to sorbitol during hyperglycemia . Reduces st…	cytosol	Golgi	Cytoplasm	0	3	0	0
COASY	Q13057	Bifunctional coenzyme A synthase	Bifunctional enzyme that catalyzes the fourth and fifth sequential steps of CoA biosynthetic pathway. The fourth reaction is catalyzed by the phosphopantetheine adenylyltransferase, coded by the coaD domain; the fifth reaction is catalyzed by the dephospho-CoA kinase, coded by the coaE domain. May act as a point of CoA biosynthesis regulation. .	mitochondrion	unclassified	Cytoplasm	0	3	0	0
TAOK1	Q7L7X3	Serine/threonine-protein kinase TAO1	Serine/threonine-protein kinase involved in various processes such as p38/MAPK14 stress-activated MAPK cascade, DNA damage response and regulation of cytoskeleton stability. Phosphorylates MAP2K3, MAP2K6 and MARK2. Acts as an activator of the p38/MAPK14 stress-activated MAPK cascade by mediating phosphorylation and subsequent activation of the upstream MAP2K3 and MAP2K6 kinases. Involved in G-pro…	plasma_membrane	plasma_membrane	Cytoplasm	0	3	0	0
YTHDC2	Q9H6S0	3'-5' RNA helicase YTHDC2	3'-5' RNA helicase that plays a key role in the male and female germline by promoting transition from mitotic to meiotic divisions in stem cells . Specifically recognizes and binds N6-methyladenosine -containing RNAs, a modification present at internal sites of mRNAs and some non-coding RNAs that plays a role in the efficiency of RNA processing and stability . Essential for ensuring a successful …	p-body	p-body	Cytoplasm	0	3	0	0
SCYL1	Q96KG9	N-terminal kinase-like protein	Regulates COPI-mediated retrograde protein traffic at the interface between the Golgi apparatus and the endoplasmic reticulum . Involved in the maintenance of the Golgi apparatus morphology . Has no detectable kinase activity in vitro . .; Isoform 6 acts as transcriptional activator. It binds to three different types of GC-rich DNA binding sites in the beta-polymerase promoter region. It also bin…	cytosol	ERGIC	Cytoplasm, cytoskeleton, microtubule organizing center, centrosome	0	3	0	0
FAT4	Q6V0I7	Protocadherin Fat 4	Cadherins are calcium-dependent cell adhesion proteins. FAT4 plays a role in the maintenance of planar cell polarity as well as in inhibition of YAP1-mediated neuroprogenitor cell proliferation and differentiation . .			Membrane ; Single-pass type I membrane protein	0	3	0	0
CPNE1	Q99829	Copine-1	Calcium-dependent phospholipid-binding protein that plays a role in calcium-mediated intracellular processes . Involved in the TNF-alpha receptor signaling pathway in a calcium-dependent manner . Exhibits calcium-dependent phospholipid binding properties . Plays a role in neuronal progenitor cell differentiation; induces neurite outgrowth via a AKT-dependent signaling cascade and calcium-independ…	cytosol	cytosol	Nucleus	0	3	0	0
TNPO3	Q9Y5L0	Transportin-3	Importin, which transports target proteins into the nucleus . Specifically mediates the nuclear import of splicing factor serine/arginine proteins, such as RBM4, SFRS1 and SFRS2, by recognizing phosphorylated SR domains . Also mediates the nuclear import of serine/arginine protein CPSF6, independently of CPSF6 phosphorylation . The nuclear import process is regulated by the small GTPase Ran that …	cytosol	unclassified	Nucleus envelope	0	3	0	0
BRIX1	Q8TDN6	Ribosome biogenesis protein BRX1 homolog	Required for biogenesis of the 60S ribosomal subunit.	nucleolus	nucleus	Nucleus, nucleolus	0	3	0	0
ANXA4	P09525	Annexin A4	Calcium/phospholipid-binding protein which promotes membrane fusion and is involved in exocytosis. .	cytosol	cytosol	Zymogen granule membrane ; Peripheral membrane protein	0	3	0	0
FARP2	O94887	FERM, ARHGEF and pleckstrin domain-containing protein 2	Functions as guanine nucleotide exchange factor that activates RAC1. May have relatively low activity. Plays a role in the response to class 3 semaphorins and remodeling of the actin cytoskeleton. Plays a role in TNFSF11-mediated osteoclast differentiation, especially in podosome rearrangement and reorganization of the actin cytoskeleton. Regulates the activation of ITGB3, integrin signaling and …	actin_cytoskeleton	plasma_membrane		0	3	0	0
GMFB	P60983	Glia maturation factor beta	This protein causes differentiation of brain cells, stimulation of neural regeneration, and inhibition of proliferation of tumor cells.	actin_cytoskeleton	unclassified		0	3	0	0
REPS1	Q96D71	RalBP1-associated Eps domain-containing protein 1	May coordinate the cellular actions of activated EGF receptors and Ral-GTPases. .	actin_cytoskeleton	actin_cytoskeleton	Membrane, clathrin-coated pit	0	3	1.667	0
FILIP1L	Q4L180	Filamin A-interacting protein 1-like	Acts as a regulator of the antiangiogenic activity on endothelial cells. When overexpressed in endothelial cells, leads to inhibition of cell proliferation and migration and an increase in apoptosis. Inhibits melanoma growth When expressed in tumor-associated vasculature. .			Cytoplasm	3.333	3	0	0
RDX	P35241	Radixin	Probably plays a crucial role in the binding of the barbed end of actin filaments to the plasma membrane.	plasma_membrane	actin_cytoskeleton	Cell membrane; Peripheral membrane protein; Cytoplasmic side	4	3	0	0
PALS1	Q8N3R9	Protein PALS1	Plays a role in tight junction biogenesis and in the establishment of cell polarity in epithelial cells . Also involved in adherens junction biogenesis by ensuring correct localization of the exocyst complex protein EXOC4/SEC8 which allows trafficking of adherens junction structural component CDH1 to the cell surface . Plays a role through its interaction with CDH5 in vascular lumen formation and…	plasma_membrane	actin_cytoskeleton	Golgi apparatus	6	3	4.667	0
EFR3A	Q14156	Protein EFR3 homolog A	Component of a complex required to localize phosphatidylinositol 4-kinase to the plasma membrane . The complex acts as a regulator of phosphatidylinositol 4-phosphate P synthesis . In the complex, EFR3A probably acts as the membrane-anchoring component . Also involved in responsiveness to G-protein-coupled receptors; it is however unclear whether this role is direct or indirect . .	plasma_membrane	plasma_membrane	Cell membrane ; Lipid-anchor	0	2.667	0	0
CD82	P27701	CD82 antigen	Associates with CD4 or CD8 and delivers costimulatory signals for the TCR/CD3 pathway.			Cell membrane ; Multi-pass membrane protein	0	2.667	0	0
EPHB4	P54760	Ephrin type-B receptor 4	Receptor tyrosine kinase which binds promiscuously transmembrane ephrin-B family ligands residing on adjacent cells, leading to contact-dependent bidirectional signaling into neighboring cells. The signaling pathway downstream of the receptor is referred to as forward signaling while the signaling pathway downstream of the ephrin ligand is referred to as reverse signaling. Together with its cogna…	plasma_membrane	plasma_membrane	Cell membrane ; Single-pass type I membrane protein	0	2.667	0	0	2.667
FARP1	Q9Y4F1	FERM, ARHGEF and pleckstrin domain-containing protein 1	Functions as guanine nucleotide exchange factor for RAC1. May play a role in semaphorin signaling. Plays a role in the assembly and disassembly of dendritic filopodia, the formation of dendritic spines, regulation of dendrite length and ultimately the formation of synapses . .	plasma_membrane	actin_cytoskeleton	Cell membrane; Peripheral membrane protein; Cytoplasmic side	0	2.667	0	0
ABR	Q12979	Active breakpoint cluster region-related protein	Protein with a unique structure having two opposing regulatory activities toward small GTP-binding proteins. The C-terminus is a GTPase-activating protein domain which stimulates GTP hydrolysis by RAC1, RAC2 and CDC42. Accelerates the intrinsic rate of GTP hydrolysis of RAC1 or CDC42, leading to down-regulation of the active GTP-bound form . The central Dbl homology domain functions as guanine nu…	cytosol	cytosol	Cell projection, dendritic spine	0	2.667	0	0
FNBP1	Q96RU3	Formin-binding protein 1	May act as a link between RND2 signaling and regulation of the actin cytoskeleton . Required to coordinate membrane tubulation with reorganization of the actin cytoskeleton during the late stage of clathrin-mediated endocytosis. Binds to lipids such as phosphatidylinositol 4,5-bisphosphate and phosphatidylserine and promotes membrane invagination and the formation of tubules. Also enhances actin …	cytosol	unclassified	Cytoplasm	0	2.667	0	0
ITSN2	Q9NZM3	Intersectin-2	Adapter protein that may provide indirect link between the endocytic membrane traffic and the actin assembly machinery. May regulate the formation of clathrin-coated vesicles . Seems to be involved in CCPs maturation including invagination or budding. Involved in endocytosis of integrin beta-1 and transferrin receptor . Plays a role in dendrite formation by melanocytes . .	plasma_membrane	actin_cytoskeleton	Cytoplasm	0	2.667	0	0
ABI2	Q9NYB9	Abl interactor 2	Regulator of actin cytoskeleton dynamics underlying cell motility and adhesion. Functions as a component of the WAVE complex, which activates actin nucleating machinery Arp2/3 to drive lamellipodia formation . Acts as regulator and substrate of nonreceptor tyrosine kinases ABL1 and ABL2 involved in processes linked to cell growth and differentiation. Positively regulates ABL1-mediated phosphoryla…	actin_cytoskeleton	plasma_membrane	Cytoplasm	0	2.667	0	0
MAP2K2	P36507	Dual specificity mitogen-activated protein kinase kinase 2	Catalyzes the concomitant phosphorylation of a threonine and a tyrosine residue in a Thr-Glu-Tyr sequence located in MAP kinases. Activates the ERK1 and ERK2 MAP kinases . Activates BRAF in a KSR1 or KSR2-dependent manner; by binding to KSR1 or KSR2 releases the inhibitory intramolecular interaction between KSR1 or KSR2 protein kinase and N-terminal domains which promotes KSR1 or KSR2-BRAF dimeri…	cytosol	unclassified	Cytoplasm	0	2.667	0	0
MAP4K4	O95819	Mitogen-activated protein kinase kinase kinase kinase 4	Serine/threonine kinase that may play a role in the response to environmental stress and cytokines such as TNF-alpha. Appears to act upstream of the JUN N-terminal pathway. Phosphorylates SMAD1 on Thr-322. .	actin_cytoskeleton	unclassified	Cytoplasm	0	2.667	0	0
SERPINB6	P35237	Serpin B6	May be involved in the regulation of serine proteinases present in the brain or extravasated from the blood . Inhibitor of cathepsin G, kallikrein-8 and thrombin. May play an important role in the inner ear in the protection against leakage of lysosomal content during stress and loss of this protection results in cell death and sensorineural hearing loss. .	cytosol	cytosol	Cytoplasm	0	2.667	0	0
STON1	Q9Y6Q2	Stonin-1	May be involved in the endocytic machinery. .	cytosol	cytosol	Cytoplasm	0	2.667	0	0
FSCN1	Q16658	Fascin	Actin-binding protein that contains 2 major actin binding sites . Organizes filamentous actin into parallel bundles . Plays a role in the organization of actin filament bundles and the formation of microspikes, membrane ruffles, and stress fibers . Important for the formation of a diverse set of cell protrusions, such as filopodia, and for cell motility and migration . Mediates reorganization of …	cytosol	plasma_membrane	Cytoplasm, cytosol	0	2.667	0	0
HIP1R	O75146	Huntingtin-interacting protein 1-related protein	Component of clathrin-coated pits and vesicles, that may link the endocytic machinery to the actin cytoskeleton. Binds 3-phosphoinositides . May act through the ENTH domain to promote cell survival by stabilizing receptor tyrosine kinases following ligand-induced endocytosis. .	plasma_membrane	actin_cytoskeleton	Cytoplasm, perinuclear region	0	2.667	0	0
PDCD6	O75340	Programmed cell death protein 6	Calcium sensor that plays a key role in processes such as endoplasmic reticulum -Golgi vesicular transport, endosomal biogenesis or membrane repair. Acts as an adapter that bridges unrelated proteins or stabilizes weak protein-protein complexes in response to calcium: calcium-binding triggers exposure of apolar surface, promoting interaction with different sets of proteins thanks to 3 different h…	cytosol	cytosol	Endoplasmic reticulum membrane ; Peripheral membrane protein	0	2.667	0	0
PARP14	Q460N5	Protein mono-ADP-ribosyltransferase PARP14	ADP-ribosyltransferase that mediates mono-ADP-ribosylation of glutamate residues on target proteins . In contrast to PARP1 and PARP2, it is not able to mediate poly-ADP-ribosylation . Has been shown to catalyze the mono-ADP-ribosylation of STAT1 at 'Glu-657' and 'Glu-705', thus decreasing STAT1 phosphorylation which negatively regulates pro-inflammatory cytokine production in macrophages in respo…			Nucleus	0	2.667	0	0
DENND2B	P78524	DENN domain-containing protein 2B	: May be involved in cytoskeletal organization and tumorogenicity. Seems to be involved in a signaling transduction pathway leading to activation of MAPK1/ERK2. Plays a role in EGFR trafficking from recycling endosomes back to the cell membrane . .; : Guanine nucleotide exchange factor which may activate RAB9A and RAB9B. Promotes the exchange of GDP to GTP, converting inactive GDP-bound Rab prote…	actin_cytoskeleton	actin_cytoskeleton	Cytoplasm, cell cortex	0	2.667	0	0
CNN1	P51911	Calponin-1	Thin filament-associated protein that is implicated in the regulation and modulation of smooth muscle contraction. It is capable of binding to actin, calmodulin and tropomyosin. The interaction of calponin with actin inhibits the actomyosin Mg-ATPase activity . .				0	2.667	0	0
GALK1	P51570	Galactokinase	Catalyzes the transfer of a phosphate from ATP to alpha-D-galactose and participates in the first committed step in the catabolism of galactose. .	cytosol	cytosol		0	2.667	0	0
TAGLN3	Q9UI15	Transgelin-3					0	2.667	0	0
SHC1	P29353	SHC-transforming protein 1	Signaling adapter that couples activated growth factor receptors to signaling pathways. Participates in a signaling cascade initiated by activated KIT and KITLG/SCF. Isoform p46Shc and isoform p52Shc, once phosphorylated, couple activated receptor tyrosine kinases to Ras via the recruitment of the GRB2/SOS complex and are implicated in the cytoplasmic propagation of mitogenic signals. Isoform p46…	cytosol	unclassified	Cytoplasm	1.667	2.667	0	0
RPS13	P62277	Small ribosomal subunit protein uS15	Component of the small ribosomal subunit. The ribosome is a large ribonucleoprotein complex responsible for the synthesis of proteins in the cell. Part of the small subunit processome, first precursor of the small eukaryotic ribosomal subunit. During the assembly of the SSU processome in the nucleolus, many ribosome biogenesis factors, an RNA chaperone and ribosomal proteins associate with the na…	translation	translation	Cytoplasm	0	2.667	1.667	0
SNX17	Q15036	Sorting nexin-17	Critical regulator of endosomal recycling of numerous surface proteins, including integrins, signaling receptor and channels . Binds to NPxY sequences in the cytoplasmic tails of target cargos . Associates with retriever and CCC complexes to prevent lysosomal degradation and promote cell surface recycling of numerous cargos such as integrins ITGB1, ITGB5 and their associated alpha subunits . Also…	early_endosome	unclassified	Cytoplasm	1.667	2.667	0	0
EPB41L1	Q9H4G0	Band 4.1-like protein 1	May function to confer stability and plasticity to neuronal membrane via multiple interactions, including the spectrin-actin-based cytoskeleton, integral membrane channels and membrane-associated guanylate kinases.	plasma_membrane	plasma_membrane	Cytoplasm, cytoskeleton	0	2.667	2.333	0
AIMP2	Q13155	Aminoacyl tRNA synthase complex-interacting multifunctional protein 2	Required for assembly and stability of the aminoacyl-tRNA synthase complex . Mediates ubiquitination and degradation of FUBP1, a transcriptional activator of MYC, leading to MYC down-regulation which is required for aveolar type II cell differentiation. Blocks MDM2-mediated ubiquitination and degradation of p53/TP53. Functions as a proapoptotic factor. .	ER	unclassified	Cytoplasm, cytosol	0	2.667	2.333	0
TAB1	Q15750	TGF-beta-activated kinase 1 and MAP3K7-binding protein 1	Key adapter protein that plays an essential role in JNK and NF-kappa-B activation and proinflammatory cytokines production in response to stimulation with TLRs and cytokines . Mechanistically, associates with the catalytic domain of MAP3K7/TAK1 to trigger MAP3K7/TAK1 autophosphorylation leading to its full activation . Similarly, associates with MAPK14 and triggers its autophosphorylation and sub…				2.333	2.667	0	0
NRAS	P01111	GTPase NRas	Ras proteins bind GDP/GTP and possess intrinsic GTPase activity. .	plasma_membrane	plasma_membrane	Cell membrane ; Lipid-anchor ; Cytoplasmic side	3	2.667	0	0
YES1	P07947	Tyrosine-protein kinase Yes	Non-receptor protein tyrosine kinase that is involved in the regulation of cell growth and survival, apoptosis, cell-cell adhesion, cytoskeleton remodeling, and differentiation. Stimulation by receptor tyrosine kinases including EGFR, PDGFR, CSF1R and FGFR leads to recruitment of YES1 to the phosphorylated receptor, and activation and phosphorylation of downstream substrates. Upon EGFR activation…	plasma_membrane	plasma_membrane	Cell membrane	3.333	2.667	0	0
EIF1AX	P47813	Eukaryotic translation initiation factor 1A, X-chromosomal	Component of the 43S pre-initiation complex , which binds to the mRNA cap-proximal region, scans mRNA 5'-untranslated region, and locates the initiation codon . This protein enhances formation of the cap-proximal complex . Together with EIF1, facilitates scanning, start codon recognition, promotion of the assembly of 48S complex at the initiation codon , and dissociation of aberrant complexes . A…			Cytoplasm	3.333	2.667	0	0
MTAP	Q13126	S-methyl-5'-thioadenosine phosphorylase	Catalyzes the reversible phosphorylation of S-methyl-5'-thioadenosine to adenine and 5-methylthioribose-1-phosphate. Involved in the breakdown of MTA, a major by-product of polyamine biosynthesis. Responsible for the first step in the methionine salvage pathway after MTA has been generated from S-adenosylmethionine. Has broad substrate specificity with 6-aminopurine nucleosides as preferred subst…	cytosol	unclassified	Cytoplasm	3.667	2.667	0	2.333
ASNS	P08243	Asparagine synthetase		cytosol	unclassified		3	2.667	0	4.667
AARSD1	Q9BTE6	Alanyl-tRNA editing protein Aarsd1	Functions in trans to edit the amino acid moiety from incorrectly charged tRNA. .	cytosol	cytosol	Cytoplasm	0	2.333	0	0
SH3GLB1	Q9Y371	Endophilin-B1	May be required for normal outer mitochondrial membrane dynamics . Required for coatomer-mediated retrograde transport in certain cells . May recruit other proteins to membranes with high curvature. May promote membrane fusion . Involved in activation of caspase-dependent apoptosis by promoting BAX/BAK1 activation . Isoform 1 acts proapoptotic in fibroblasts . Involved in caspase-independent apop…	trans-Golgi	unclassified	Cytoplasm	0	2.333	0	0
TUBB4A	P04350	Tubulin beta-4A chain	Tubulin is the major constituent of microtubules, a cylinder consisting of laterally associated linear protofilaments composed of alpha- and beta-tubulin heterodimers. Microtubules grow by the addition of GTP-tubulin dimers to the microtubule end, where a stabilizing cap forms. Below the cap, tubulin dimers are in GDP-bound state, owing to GTPase activity of alpha-tubulin.	cytosol	cytosol	Cytoplasm, cytoskeleton	0	2.333	0	0
CTNNAL1	Q9UBT7	Alpha-catulin	May modulate the Rho pathway signaling by providing a scaffold for the Lbc Rho guanine nucleotide exchange factor .	plasma_membrane	plasma_membrane	Cytoplasm, cytoskeleton	0	2.333	0	0
YKT6	O15498	Synaptobrevin homolog YKT6	Vesicular soluble NSF attachment protein receptor mediating vesicle docking and fusion to a specific acceptor cellular compartment. Functions in endoplasmic reticulum to Golgi transport; as part of a SNARE complex composed of GOSR1, GOSR2 and STX5. Functions in early/recycling endosome to TGN transport; as part of a SNARE complex composed of BET1L, GOSR1 and STX5. Has a S-palmitoyl transferase ac…	ER	unclassified	Cytoplasm, cytosol	0	2.333	0	0
PDIA5	Q14554	Protein disulfide-isomerase A5		ER	ER	Endoplasmic reticulum lumen	0	2.333	0	0
IGF2BP1	Q9NZI8	Insulin-like growth factor 2 mRNA-binding protein 1	RNA-binding factor that recruits target transcripts to cytoplasmic protein-RNA complexes . This transcript 'caging' into mRNPs allows mRNA transport and transient storage. It also modulates the rate and location at which target transcripts encounter the translational apparatus and shields them from endonuclease attacks or microRNA-mediated degradation. Preferentially binds to N6-methyladenosine -…	stress_granule	stress_granule	Nucleus	0	2.333	0	0
CUL2	Q13617	Cullin-2	Core component of multiple cullin-RING-based ECS E3 ubiquitin-protein ligase complexes, which mediate the ubiquitination of target proteins . CUL2 may serve as a rigid scaffold in the complex and may contribute to catalysis through positioning of the substrate and the ubiquitin-conjugating enzyme . The E3 ubiquitin-protein ligase activity of the complex is dependent on the neddylation of the cull…	unclassified	cytosol	Nucleus	0	2.333	0	0
ATP2B1	P20020	Plasma membrane calcium-transporting ATPase 1	Catalyzes the hydrolysis of ATP coupled with the transport of calcium from the cytoplasm to the extracellular space thereby maintaining intracellular calcium homeostasis . Plays a role in blood pressure regulation through regulation of intracellular calcium concentration and nitric oxide production leading to regulation of vascular smooth muscle cells vasoconstriction. Positively regulates bone m…	plasma_membrane	plasma_membrane	Cell membrane ; Multi-pass membrane protein	0	2.333	1.667	0
NAPA	P54920	Alpha-soluble NSF attachment protein	Required for vesicular transport between the endoplasmic reticulum and the Golgi apparatus . Together with GNA12 promotes CDH5 localization to plasma membrane . .	early_endosome	unclassified	Cell membrane ; Peripheral membrane protein	1.667	2.333	0	0
PSMD12	O00232	26S proteasome non-ATPase regulatory subunit 12	Component of the 26S proteasome, a multiprotein complex involved in the ATP-dependent degradation of ubiquitinated proteins. This complex plays a key role in the maintenance of protein homeostasis by removing misfolded or damaged proteins, which could impair cellular functions, and by removing proteins whose functions are no longer required. Therefore, the proteasome participates in numerous cell…	proteasome	unclassified		0	2.333	1.667	0
CLINT1	Q14677	Clathrin interactor 1	Binds to membranes enriched in phosphatidylinositol 4,5-bisphosphate P2. May have a role in transport via clathrin-coated vesicles from the trans-Golgi network to endosomes. Stimulates clathrin assembly. .	early_endosome	early_endosome	Cytoplasm	2.333	2.333	0	0
C2CD5	Q86YS7	C2 domain-containing protein 5	Required for insulin-stimulated glucose transport and glucose transporter SLC2A4/GLUT4 translocation from intracellular glucose storage vesicle to the plasma membrane in adipocytes. Binds phospholipid membranes in a calcium-dependent manner and is necessary for the optimal membrane fusion between SLC2A4/GLUT4 GSV and the PM. .	plasma_membrane	unclassified	Cytoplasmic vesicle membrane	2.333	2.333	0	0
SIRPA	P78324	Tyrosine-protein phosphatase non-receptor type substrate 1	Immunoglobulin-like cell surface receptor for CD47. Acts as docking protein and induces translocation of PTPN6, PTPN11 and other binding partners from the cytosol to the plasma membrane. Supports adhesion of cerebellar neurons, neurite outgrowth and glial cell attachment. May play a key role in intracellular signaling during synaptogenesis and in synaptic function . Involved in the negative regul…	recycling_endosome	plasma_membrane	Membrane; Single-pass type I membrane protein	3	2.333	0	0
SEPTIN8	Q92599	Septin-8	Filament-forming cytoskeletal GTPase . May play a role in platelet secretion . Seems to participate in the process of SNARE complex formation in synaptic vesicles . .; : Stabilizes BACE1 protein levels and promotes the sorting and accumulation of BACE1 to the recycling or endosomal compartments, modulating the beta-amyloidogenic processing of APP. .	actin_cytoskeleton	actin_cytoskeleton	Cytoplasm	3.333	2.333	0	0
NHLRC2	Q8NBF2	NHL repeat-containing protein 2	Required for normal embryonic development. .	cytosol	cytosol	Cytoplasm, cytosol	4	2.333	0	0
MPST	P25325	3-mercaptopyruvate sulfurtransferase	Transfer of a sulfur ion to cyanide or to other thiol compounds. Also has weak rhodanese activity. Detoxifies cyanide and is required for thiosulfate biosynthesis. Acts as an antioxidant. In combination with cysteine aminotransferase , contributes to the catabolism of cysteine and is an important producer of hydrogen sulfide in the brain, retina and vascular endothelial cells. Hydrogen sulfide HS…	mitochondrion	unclassified	Cytoplasm	3	2.333	1.667	0
TIPRL	O75663	TIP41-like protein	May be a allosteric regulator of serine/threonine-protein phosphatase 2A . Isoform 1 inhibits catalytic activity of the PP2A core complex in vitro. The PP2A:TIPRL complex does not show phosphatase activity. Acts as negative regulator of serine/threonine-protein phosphatase 4 probably by inhibiting the formation of the active PPP4C:PPP4R2 complex; the function is proposed to implicate it in DNA da…	cytosol	cytosol	Cytoplasm	3	2.333	1.667	0
PTPRK	Q15262	Receptor-type tyrosine-protein phosphatase kappa	Regulation of processes involving cell contact and adhesion such as growth control, tumor invasion, and metastasis. Negative regulator of EGFR signaling pathway. Forms complexes with beta-catenin and gamma-catenin/plakoglobin. Beta-catenin may be a substrate for the catalytic activity of PTPRK/PTP-kappa. .	plasma_membrane	plasma_membrane	Cell junction, adherens junction	0	1.667	0	0
RAB35	Q15286	Ras-related protein Rab-35	The small GTPases Rab are key regulators of intracellular membrane trafficking, from the formation of transport vesicles to their fusion with membranes. Rabs cycle between an inactive GDP-bound form and an active GTP-bound form that is able to recruit to membranes different sets of downstream effectors directly responsible for vesicle formation, movement, tethering and fusion. That Rab is involve…	plasma_membrane	plasma_membrane	Cell membrane ; Lipid-anchor ; Cytoplasmic side	0	1.667	0	0
SLC9A1	P19634	Sodium/hydrogen exchanger 1 /H antiporter, amiloride-sensitive /H exchanger 1	Electroneutral Na /H antiporter that extrudes Na in exchange for external protons driven by the inward sodium ion chemical gradient, protecting cells from acidification that occurs from metabolism . Exchanges intracellular H ions for extracellular Na in 1:1 stoichiometry . Plays a key role in maintening intracellular pH neutral and cell volume, and thus is important for cell growth, proliferation…	plasma_membrane	plasma_membrane	Cell membrane ; Multi-pass membrane protein	0	1.667	0	0
RAPGEF2	Q9Y4G8	Rap guanine nucleotide exchange factor 2	Functions as a guanine nucleotide exchange factor , which activates Rap and Ras family of small GTPases by exchanging bound GDP for free GTP in a cAMP-dependent manner. Serves as a link between cell surface receptors and Rap/Ras GTPases in intracellular signaling cascades. Acts also as an effector for Rap1 by direct association with Rap1-GTP thereby leading to the amplification of Rap1-mediated s…	unclassified	unclassified	Cytoplasm	0	1.667	0	0
VASP	P50552	Vasodilator-stimulated phosphoprotein	Ena/VASP proteins are actin-associated proteins involved in a range of processes dependent on cytoskeleton remodeling and cell polarity such as axon guidance, lamellipodial and filopodial dynamics, platelet activation and cell migration. VASP promotes actin filament elongation. It protects the barbed end of growing actin filaments against capping and increases the rate of actin polymerization in …	actin_cytoskeleton	actin_cytoskeleton	Cytoplasm	0	1.667	0	0
CASP8	Q14790	Caspase-8	Thiol protease that plays a key role in programmed cell death by acting as a molecular switch for apoptosis, necroptosis and pyroptosis, and is required to prevent tissue damage during embryonic development and adulthood . Initiator protease that induces extrinsic apoptosis by mediating cleavage and activation of effector caspases responsible for the TNFRSF6/FAS mediated and TNFRSF1A induced cell…	cytosol	cytosol	Cytoplasm	0	1.667	0	0
CHUK	O15111	Inhibitor of nuclear factor kappa-B kinase subunit alpha	Serine kinase that plays an essential role in the NF-kappa-B signaling pathway which is activated by multiple stimuli such as inflammatory cytokines, bacterial or viral products, DNA damages or other cellular stresses . Acts as part of the canonical IKK complex in the conventional pathway of NF-kappa-B activation and phosphorylates inhibitors of NF-kappa-B on serine residues . These modifications…	cytosol	cytosol	Cytoplasm	0	1.667	0	0
COPS2	P61201	COP9 signalosome complex subunit 2	Essential component of the COP9 signalosome complex , a complex involved in various cellular and developmental processes. The CSN complex is an essential regulator of the ubiquitin conjugation pathway by mediating the deneddylation of the cullin subunits of SCF-type E3 ligase complexes, leading to decrease the Ubl ligase activity of SCF-type complexes such as SCF, CSA or DDB2. The complex is also…	cytosol	unclassified	Cytoplasm	0	1.667	0	0
CSTB	P04080	Cystatin-B	This is an intracellular thiol proteinase inhibitor. Tightly binding reversible inhibitor of cathepsins L, H and B.	cytosol	unclassified	Cytoplasm	0	1.667	0	0
FTSJ1	Q9UET6	tRNA /guanosine-2'-O-methyltransferase	Methylates the 2'-O-ribose of nucleotides at positions 32 and 34 of the tRNA anticodon loop of substrate tRNAs . Requisite for faithful cytoplasmic translation . Requires THADA for methylation of the nucleotide at position 32 of the anticodon loop of substrate tRNAs . Requires WDR6 for methylation of the nucleotide at position 34 of the anticodon loop of substrate tRNAs . Promotes translation eff…	plasma_membrane	plasma_membrane	Cytoplasm	0	1.667	0	0
LGALS3	P17931	Galectin-3	Galactose-specific lectin which binds IgE. May mediate with the alpha-3, beta-1 integrin the stimulation by CSPG4 of endothelial cells migration. Together with DMBT1, required for terminal differentiation of columnar epithelial cells during early embryogenesis . In the nucleus: acts as a pre-mRNA splicing factor. Involved in acute inflammatory responses including neutrophil activation and adhesio…			Cytoplasm	0	1.667	0	0
MAP3K7	O43318	Mitogen-activated protein kinase kinase kinase 7	Serine/threonine kinase which acts as an essential component of the MAP kinase signal transduction pathway . Plays an important role in the cascades of cellular responses evoked by changes in the environment . Mediates signal transduction of TRAF6, various cytokines including interleukin-1 , transforming growth factor-beta , TGFB-related factors like BMP2 and BMP4, toll-like receptors , tumor nec…	cytosol	unclassified	Cytoplasm	0	1.667	0	0
MTSS2	Q765P7	Protein MTSS 2	Involved in plasma membrane dynamics. Potentiated PDGF-mediated formation of membrane ruffles and lamellipodia in fibroblasts, acting via RAC1 activation . May function in actin bundling . .			Cytoplasm	0	1.667	0	0
PSMA2	P25787	Proteasome subunit alpha type-2	Component of the 20S core proteasome complex involved in the proteolytic degradation of most intracellular proteins. This complex plays numerous essential roles within the cell by associating with different regulatory particles. Associated with two 19S regulatory particles, forms the 26S proteasome and thus participates in the ATP-dependent degradation of ubiquitinated proteins. The 26S proteasom…	proteasome	cytosol	Cytoplasm	0	1.667	0	0
PSMD10	O75832	26S proteasome non-ATPase regulatory subunit 10	Acts as a chaperone during the assembly of the 26S proteasome, specifically of the PA700/19S regulatory complex . In the initial step of the base subcomplex assembly is part of an intermediate PSMD10:PSMC4:PSMC5:PAAF1 module which probably assembles with a PSMD5:PSMC2:PSMC1:PSMD2 module. Independently of the proteasome, regulates EGF-induced AKT activation through inhibition of the RHOA/ROCK/PTEN…	cytosol	cytosol	Cytoplasm	0	1.667	0	0
RANBP9	Q96S59	Ran-binding protein 9	May act as scaffolding protein, and as adapter protein to couple membrane receptors to intracellular signaling pathways . Acts as a mediator of cell spreading and actin cytoskeleton rearrangement . Core component of the CTLH E3 ubiquitin-protein ligase complex that selectively accepts ubiquitin from UBE2H and mediates ubiquitination and subsequent proteasomal degradation of the transcription fact…	cytosol	cytosol	Cytoplasm	0	1.667	0	0
SKIC3	Q6PGP7	Superkiller complex protein 3	Component of the SKI complex, a multiprotein complex that assists the RNA-degrading exosome during the mRNA decay and quality-control pathways . The SKI complex catalyzes mRNA extraction from 80S ribosomal complexes in the 3'-5' direction and channels mRNA to the cytosolic exosome for degradation . SKI-mediated extraction of mRNA from stalled ribosomes allow binding of the Pelota-HBS1L complex an…	stress_granule	stress_granule	Cytoplasm	0	1.667	0	0
UBAP1	Q9NZ09	Ubiquitin-associated protein 1	Component of the ESCRT-I complex, a regulator of vesicular trafficking process . Binds to ubiquitinated cargo proteins and is required for the sorting of endocytic ubiquitinated cargos into multivesicular bodies . Plays a role in the proteasomal degradation of ubiquitinated cell-surface proteins, such as EGFR and BST2 . .	cytosol	cytosol	Cytoplasm, cytosol	0	1.667	0	0
SH3RF1	Q7Z6J0	E3 ubiquitin-protein ligase SH3RF1	Has E3 ubiquitin-protein ligase activity. In the absence of an external substrate, it can catalyze self-ubiquitination . Stimulates ubiquitination of potassium channel KCNJ1, enhancing it's dynamin-dependent and clathrin-independent endocytosis . Acts as a scaffold protein that coordinates with MAPK8IP1/JIP1 in organizing different components of the JNK pathway, including RAC1 or RAC2, MAP3K11/ML…	14-3-3_scaffold	cytosol	Cytoplasm, perinuclear region	0	1.667	0	0
RAB10	P61026	Ras-related protein Rab-10	The small GTPases Rab are key regulators of intracellular membrane trafficking, from the formation of transport vesicles to their fusion with membranes . Rabs cycle between an inactive GDP-bound form and an active GTP-bound form that is able to recruit to membranes different set of downstream effectors directly responsible for vesicle formation, movement, tethering and fusion . That Rab is mainly…	plasma_membrane	unclassified	Cytoplasmic vesicle membrane ; Lipid-anchor ; Cytoplasmic side	0	1.667	0	0
PRAF2	O60831	PRA1 family protein 2	May be involved in ER/Golgi transport and vesicular traffic. Plays a proapoptotic role in cerulenin-induced neuroblastoma apoptosis. .	ER	unclassified	Endosome membrane ; Multi-pass membrane protein	0	1.667	0	0
ARF5	P84085	ADP-ribosylation factor 5	GTP-binding protein involved in protein trafficking; may modulate vesicle budding and uncoating within the Golgi apparatus. .; Functions as an allosteric activator of the cholera toxin catalytic subunit, an ADP-ribosyltransferase. .	Golgi	ERGIC	Golgi apparatus	0	1.667	0	0
VPS51	Q9UID3	Vacuolar protein sorting-associated protein 51 homolog	Acts as component of the GARP complex that is involved in retrograde transport from early and late endosomes to the trans-Golgi network . The GARP complex is required for the maintenance of protein retrieval from endosomes to the TGN, acid hydrolase sorting, lysosome function, endosomal cholesterol traffic and autophagy. VPS51 participates in retrograde transport of acid hydrolase receptors, like…	unclassified	unclassified	Golgi apparatus, trans-Golgi network	0	1.667	0	0
NAPG	Q99747	Gamma-soluble NSF attachment protein	Required for vesicular transport between the endoplasmic reticulum and the Golgi apparatus.	trans-Golgi	ERGIC	Membrane ; Peripheral membrane protein	0	1.667	0	0
LRRC59	Q96AG4	Leucine-rich repeat-containing protein 59	Required for nuclear import of FGF1, but not that of FGF2. Might regulate nuclear import of exogenous FGF1 by facilitating interaction with the nuclear import machinery and by transporting cytosolic FGF1 to, and possibly through, the nuclear pores. .	ER	ER	Microsome membrane ; Single-pass type II membrane protein	0	1.667	0	0
ACAD9	Q9H845	Complex I assembly factor ACAD9, mitochondrial	As part of the MCIA complex, primarily participates in the assembly of the mitochondrial complex I and therefore plays a role in oxidative phosphorylation . This moonlighting protein has also a dehydrogenase activity toward a broad range of substrates with greater specificity for long-chain unsaturated acyl-CoAs . However, in vivo, it does not seem to play a primary role in fatty acid oxidation .…	mitochondrion	mitochondrion	Mitochondrion inner membrane ; Peripheral membrane protein ; Matrix side	0	1.667	0	0
RARS2	Q5T160	Probable arginine--tRNA ligase, mitochondrial		mitochondrion	mitochondrion	Mitochondrion matrix	0	1.667	0	0
AGFG1	P52594	Arf-GAP domain and FG repeat-containing protein 1	Required for vesicle docking or fusion during acrosome biogenesis . May play a role in RNA trafficking or localization. In case of infection by HIV-1, acts as a cofactor for viral Rev and promotes movement of Rev-responsive element-containing RNAs from the nuclear periphery to the cytoplasm. This step is essential for HIV-1 replication. .	actin_cytoskeleton	unclassified	Nucleus	0	1.667	0	0	1.667
BCAS3	Q9H6U6	BCAS3 microtubule associated cell migration factor	Plays a role in angiogenesis. Participates in the regulation of cell polarity and directional endothelial cell migration by mediating both the activation and recruitment of CDC42 and the reorganization of the actin cytoskeleton at the cell leading edge. Promotes filipodia formation . Functions synergistically with PELP1 as a transcriptional coactivator of estrogen receptor-responsive genes. Stimu…	cytosol	cytosol	Nucleus	0	1.667	0	0
CUL3	Q13618	Cullin-3	Core component of multiple cullin-RING-based BCR E3 ubiquitin-protein ligase complexes which mediate the ubiquitination and subsequent proteasomal degradation of target proteins. BCR complexes and ARIH1 collaborate in tandem to mediate ubiquitination of target proteins . As a scaffold protein may contribute to catalysis through positioning of the substrate and the ubiquitin-conjugating enzyme. Th…	early_endosome	unclassified	Nucleus	0	1.667	0	0
BAX	Q07812	Apoptosis regulator BAX	Plays a role in the mitochondrial apoptotic process . Under normal conditions, BAX is largely cytosolic via constant retrotranslocation from mitochondria to the cytosol mediated by BCL2L1/Bcl-xL, which avoids accumulation of toxic BAX levels at the mitochondrial outer membrane . Under stress conditions, undergoes a conformation change that causes translocation to the mitochondrion membrane, leadi…	mitochondrion	peroxisome	Mitochondrion outer membrane ; Single-pass membrane protein	0	1.667	0	0
ARHGAP12	Q8IWW6	Rho GTPase-activating protein 12	GTPase activator for the Rho-type GTPases by converting them to an inactive GDP-bound state. .	actin_cytoskeleton	unclassified		0	1.667	0	0
ARL15	Q9NXU5	ADP-ribosylation factor-like protein 15		plasma_membrane	plasma_membrane		0	1.667	0	0	1.667
PRKAB1	Q9Y478	5'-AMP-activated protein kinase subunit beta-1	Non-catalytic subunit of AMP-activated protein kinase , an energy sensor protein kinase that plays a key role in regulating cellular energy metabolism. In response to reduction of intracellular ATP levels, AMPK activates energy-producing pathways and inhibits energy-consuming processes: inhibits protein, carbohydrate and lipid biosynthesis, as well as cell growth and proliferation. AMPK acts via …	cytosol	cytosol		0	1.667	0	0
QDPR	P09417	Dihydropteridine reductase	Catalyzes the conversion of quinonoid dihydrobiopterin into tetrahydrobiopterin. .	mitochondrion	unclassified		0	1.667	0	0
RPIA	P49247	Ribose-5-phosphate isomerase	Catalyzes the reversible conversion of ribose-5-phosphate to ribulose 5-phosphate and participates in the first step of the non-oxidative branch of the pentose phosphate pathway. .	translation	p-body		0	1.667	0	0
RPL10	F8W7C6	Ribosomal protein L10		translation	stress_granule		0	1.667	0	0
SRGAP2C	P0DJJ0	SLIT-ROBO Rho GTPase-activating protein 2C	Human-specific protein that acts as a key modifier of cortical connectivity in the human brain . Acts by inhibiting the functions of ancestral paralog SRGAP2/SRGAP2A, a postsynaptic protein that regulates excitatory and inhibitory synapse maturation and density in cortical pyramidal neurons . SRGAP2C is unstable but is able to heterodimerize with SRGAP2/SRGAP2A, thereby reducing SRGAP2/SRGAP2A le…				0	1.667	0	0
TPD52L2	O43399	Tumor protein D54		early_endosome	unclassified		0	1.667	0	0
UBE2L6	O14933	Ubiquitin/ISG15-conjugating enzyme E2 L6	Catalyzes the covalent attachment of ubiquitin or ISG15 to other proteins. Functions in the E6/E6-AP-induced ubiquitination of p53/TP53. Promotes ubiquitination and subsequent proteasomal degradation of FLT3. .				0	1.667	0	0
PCDHGB5	Q9Y5G0	Protocadherin gamma-B5	Potential calcium-dependent cell-adhesion protein. May be involved in the establishment and maintenance of specific neuronal connections in the brain.			Cell membrane ; Single-pass type I membrane protein	1.667	1.667	0	0
MET	P08581	Hepatocyte growth factor receptor	Receptor tyrosine kinase that transduces signals from the extracellular matrix into the cytoplasm by binding to hepatocyte growth factor/HGF ligand. Regulates many physiological processes including proliferation, scattering, morphogenesis and survival. Ligand binding at the cell surface induces autophosphorylation of MET on its intracellular domain that provides docking sites for downstream signa…	plasma_membrane	plasma_membrane	Membrane; Single-pass type I membrane protein	0	1.667	1.667	0
RAP1A	P62834	Ras-related protein Rap-1A	Induces morphological reversion of a cell line transformed by a Ras oncogene. Counteracts the mitogenic function of Ras, at least partly because it can interact with Ras GAPs and RAF in a competitive manner. Together with ITGB1BP1, regulates KRIT1 localization to microtubules and membranes. Plays a role in nerve growth factor -induced neurite outgrowth. Plays a role in the regulation of embryonic…	plasma_membrane	plasma_membrane	Cell membrane ; Lipid-anchor	0	1.667	0	2.333
APRT	P07741	Adenine phosphoribosyltransferase	Catalyzes a salvage reaction resulting in the formation of AMP, that is energically less costly than de novo synthesis. .	cytosol	cytosol	Cytoplasm	2.667	1.667	0	0
FMNL3	Q8IVF7	Formin-like protein 3	Plays a role in the regulation of cell morphology and cytoskeletal organization. Required in the control of cell shape and migration. Required for developmental angiogenesis . In this process, required for microtubule reorganization and for efficient endothelial cell elongation. In quiescent endothelial cells, triggers rearrangement of the actin cytoskeleton, but does not alter microtubule aligne…			Cytoplasm	0	1.667	4	0
RALA	P11233	Ras-related protein Ral-A	Multifunctional GTPase involved in a variety of cellular processes including gene expression, cell migration, cell proliferation, oncogenic transformation and membrane trafficking. Accomplishes its multiple functions by interacting with distinct downstream effectors . Acts as a GTP sensor for GTP-dependent exocytosis of dense core vesicles. The RALA-exocyst complex regulates integrin-dependent me…	plasma_membrane	plasma_membrane	Cell membrane ; Lipid-anchor ; Cytoplasmic side	0	1.667	1.667	2.667
GRWD1	Q9BQ67	Glutamate-rich WD repeat-containing protein 1	Histone binding-protein that regulates chromatin dynamics and minichromosome maintenance loading at replication origins, possibly by promoting chromatin openness . .	nucleus	unclassified	Nucleus, nucleolus	2.333	1.667	2.333	0
PDCD5	O14737	Programmed cell death protein 5	May function in the process of apoptosis.	actin_cytoskeleton	actin_cytoskeleton		2.333	1.667	0	2.333
PIP4K2A	P48426	Phosphatidylinositol 5-phosphate 4-kinase type-2 alpha P 4-kinase type II alpha P-5-kinase B isoform P-5-kinase C isoform P-4-kinase isoform 2-alpha	Catalyzes the phosphorylation of phosphatidylinositol 5-phosphate on the fourth hydroxyl of the myo-inositol ring, to form phosphatidylinositol 4,5-bisphosphate P2 . Has both ATP- and GTP-dependent kinase activities . May exert its function by regulating the levels of PtdIns5P, which functions in the cytosol by increasing AKT activity and in the nucleus signals through ING2 . May regulate the poo…	actin_cytoskeleton	actin_cytoskeleton	Cell membrane	0	1.333	0	0
RP2	O75695	Protein XRP2	Acts as a GTPase-activating protein involved in trafficking between the Golgi and the ciliary membrane. Involved in localization of proteins, such as NPHP3, to the cilium membrane by inducing hydrolysis of GTP ARL3, leading to the release of UNC119 . Acts as a GTPase-activating protein for tubulin in concert with tubulin-specific chaperone C, but does not enhance tubulin heterodimerization. Acts …	plasma_membrane	plasma_membrane	Cell membrane ; Lipid-anchor ; Cytoplasmic side	0	1.333	0	0
TPBG	Q13641	Trophoblast glycoprotein	May function as an inhibitor of Wnt/beta-catenin signaling by indirectly interacting with LRP6 and blocking Wnt3a-dependent LRP6 internalization. .	plasma_membrane	plasma_membrane	Cell membrane ; Single-pass type I membrane protein	0	1.333	0	0
NNMT	P40261	Nicotinamide N-methyltransferase	Catalyzes the N-methylation of nicotinamide using the universal methyl donor S-adenosyl-L-methionine to form N1-methylnicotinamide and S-adenosyl-L-homocysteine, a predominant nicotinamide/vitamin B3 clearance pathway . Plays a central role in regulating cellular methylation potential, by consuming S-adenosyl-L-methionine and limiting its availability for other methyltransferases. Actively mediat…			Cytoplasm	0	1.333	0	0
STK4	Q13043	Serine/threonine-protein kinase 4	Stress-activated, pro-apoptotic kinase which, following caspase-cleavage, enters the nucleus and induces chromatin condensation followed by internucleosomal DNA fragmentation. Key component of the Hippo signaling pathway which plays a pivotal role in organ size control and tumor suppression by restricting proliferation and promoting apoptosis. The core of this pathway is composed of a kinase casc…	ER	unclassified	Cytoplasm	0	1.333	0	0
FGD1	P98174	FYVE, RhoGEF and PH domain-containing protein 1	Activates CDC42, a member of the Ras-like family of Rho- and Rac proteins, by exchanging bound GDP for free GTP. Plays a role in regulating the actin cytoskeleton and cell shape. .	unclassified	unclassified	Cytoplasm	0	1.333	0	0
FYN	P06241	Tyrosine-protein kinase Fyn	Non-receptor tyrosine-protein kinase that plays a role in many biological processes including regulation of cell growth and survival, cell adhesion, integrin-mediated signaling, cytoskeletal remodeling, cell motility, immune response and axon guidance. Inactive FYN is phosphorylated on its C-terminal tail within the catalytic domain. Following activation by PKA, the protein subsequently associate…	plasma_membrane	plasma_membrane	Cytoplasm	0	1.333	0	0	1.333
GMPPA	Q96IJ6	Mannose-1-phosphate guanyltransferase alpha	May serve as a regulatory subunit and allow allosteric feedback inhibition of GMPPB by GDP-mannose. .	cytosol	cytosol	Cytoplasm	0	1.333	0	0
ITPA	Q9BY32	Inosine triphosphate pyrophosphatase	Pyrophosphatase that hydrolyzes the non-canonical purine nucleotides inosine triphosphate , deoxyinosine triphosphate as well as 2'-deoxy-N-6-hydroxylaminopurine triphosphate and xanthosine 5'-triphosphate to their respective monophosphate derivatives. The enzyme does not distinguish between the deoxy- and ribose forms. Probably excludes non-canonical purines from RNA and DNA precursor pools, thu…	cytosol	cytosol	Cytoplasm	0	1.333	0	0
NAA40	Q86UY6	N-alpha-acetyltransferase 40	N-alpha-acetyltransferase that specifically mediates the acetylation of the N-terminal residues of histones H4 and H2A . In contrast to other N-alpha-acetyltransferase, has a very specific selectivity for histones H4 and H2A N-terminus and specifically recognizes the 'Ser-Gly-Arg-Gly sequence' . Acts as a negative regulator of apoptosis . May play a role in hepatic lipid metabolism . .	unclassified	unclassified	Cytoplasm	0	1.333	0	0
TRIM5	Q9C035	Tripartite motif-containing protein 5	Capsid-specific restriction factor that prevents infection from non-host-adapted retroviruses. Blocks viral replication early in the life cycle, after viral entry but before reverse transcription. In addition to acting as a capsid-specific restriction factor, also acts as a pattern recognition receptor that activates innate immune signaling in response to the retroviral capsid lattice. Binding to…	cytosol	cytosol	Cytoplasm	0	1.333	0	0
VTA1	Q9NP79	Vacuolar protein sorting-associated protein VTA1 homolog	Involved in the endosomal multivesicular bodies pathway. MVBs contain intraluminal vesicles that are generated by invagination and scission from the limiting membrane of the endosome and mostly are delivered to lysosomes enabling degradation of membrane proteins, such as stimulated growth factor receptors, lysosomal enzymes and lipids. Thought to be a cofactor of VPS4A/B, which catalyzes disassem…	cytosol	cytosol	Cytoplasm	0	1.333	0	0
AJUBA	Q96IF1	LIM domain-containing protein ajuba	Adapter or scaffold protein which participates in the assembly of numerous protein complexes and is involved in several cellular processes such as cell fate determination, cytoskeletal organization, repression of gene transcription, mitosis, cell-cell adhesion, cell differentiation, proliferation and migration. Contributes to the linking and/or strengthening of epithelia cell-cell junctions in pa…			Cytoplasm, cytoskeleton	0	1.333	0	0	1.333
ARPC1B	O15143	Actin-related protein 2/3 complex subunit 1B	Component of the Arp2/3 complex, a multiprotein complex that mediates actin polymerization upon stimulation by nucleation-promoting factor . The Arp2/3 complex mediates the formation of branched actin networks in the cytoplasm, providing the force for cell motility . In addition to its role in the cytoplasmic cytoskeleton, the Arp2/3 complex also promotes actin polymerization in the nucleus, ther…	actin_cytoskeleton	actin_cytoskeleton	Cytoplasm, cytoskeleton	0	1.333	0	0
ARPC3	O15145	Actin-related protein 2/3 complex subunit 3	Component of the Arp2/3 complex, a multiprotein complex that mediates actin polymerization upon stimulation by nucleation-promoting factor . The Arp2/3 complex mediates the formation of branched actin networks in the cytoplasm, providing the force for cell motility . In addition to its role in the cytoplasmic cytoskeleton, the Arp2/3 complex also promotes actin polymerization in the nucleus, ther…	actin_cytoskeleton	actin_cytoskeleton	Cytoplasm, cytoskeleton	0	1.333	0	0
BAIAP2L1	Q9UHR4	Brain-specific angiogenesis inhibitor 1-associated protein 2-like protein 1	May function as adapter protein. Involved in the formation of clusters of actin bundles. Plays a role in the reorganization of the actin cytoskeleton in response to bacterial infection. .	plasma_membrane	plasma_membrane	Cytoplasm, cytoskeleton	0	1.333	0	0
CCDC124	Q96CT7	Coiled-coil domain-containing protein 124	Ribosome-binding protein involved in ribosome hibernation: associates with translationally inactive ribosomes and stabilizes the nonrotated conformation of the 80S ribosome, thereby promoting ribosome preservation and storage . Also required for proper progression of late cytokinetic stages . .	unclassified	unclassified	Cytoplasm, cytoskeleton, microtubule organizing center, centrosome	0	1.333	0	0
IDE	P14735	Insulin-degrading enzyme	Plays a role in the cellular breakdown of insulin, APP peptides, IAPP peptides, natriuretic peptides, glucagon, bradykinin, kallidin, and other peptides, and thereby plays a role in intercellular peptide signaling . Substrate binding induces important conformation changes, making it possible to bind and degrade larger substrates, such as insulin . Contributes to the regulation of peptide hormone …	translation	unclassified	Cytoplasm, cytosol	0	1.333	0	0
ATP6V1C1	P21283	V-type proton ATPase subunit C 1	Subunit of the V1 complex of vacuolar-ATPase , a multisubunit enzyme composed of a peripheral complex that hydrolyzes ATP and a membrane integral complex that translocates protons . V-ATPase is responsible for acidifying and maintaining the pH of intracellular compartments and in some cell types, is targeted to the plasma membrane, where it is responsible for acidifying the extracellular environm…	early_endosome	unclassified	Cytoplasmic vesicle, secretory vesicle, synaptic vesicle membrane ; Peripheral membrane protein	0	1.333	0	0
SNX8	Q9Y5X2	Sorting nexin-8	May be involved in several stages of intracellular trafficking. May play a role in intracellular protein transport from early endosomes to the trans-Golgi network. .	trans-Golgi	early_endosome	Early endosome membrane ; Peripheral membrane protein ; Cytoplasmic side	0	1.333	0	0
ARL8B	Q9NVJ2	ADP-ribosylation factor-like protein 8B	Small GTPase which cycles between active GTP-bound and inactive GDP-bound states . In its active state, binds to a variety of effector proteins playing a key role in the regulation of lysosomal positioning which is important for nutrient sensing, natural killer cell-mediated cytotoxicity and antigen presentation. Along with its effectors, orchestrates lysosomal transport and fusion . Localizes sp…	lysosome	unclassified	Late endosome membrane	0	1.333	0	0
CTSB	P07858	Cathepsin B	Thiol protease which is believed to participate in intracellular degradation and turnover of proteins . Cleaves matrix extracellular phosphoglycoprotein MEPE . Involved in the solubilization of cross-linked TG/thyroglobulin in the thyroid follicle lumen . Has also been implicated in tumor invasion and metastasis . .	lysosome	lysosome	Lysosome	0	1.333	0	0
SLC1A4	P43007	Neutral amino acid transporter A	Sodium-dependent neutral amino-acid transporter that mediates transport of alanine, serine, cysteine, proline, hydroxyproline and threonine. .	plasma_membrane	plasma_membrane	Membrane ; Multi-pass membrane protein	0	1.333	0	0
EXOC2	Q96KP1	Exocyst complex component 2	Component of the exocyst complex involved in the docking of exocytic vesicles with fusion sites on the plasma membrane. .	plasma_membrane	plasma_membrane	Midbody, Midbody ring	0	1.333	0	0
PMPCB	O75439	Mitochondrial-processing peptidase subunit beta	Catalytic subunit of the essential mitochondrial processing protease , which cleaves the mitochondrial sequence off newly imported precursors proteins . Preferentially, cleaves after an arginine at position P2 . Required for PINK1 turnover by coupling PINK1 mitochondrial import and cleavage, which results in subsequent PINK1 proteolysis . .	mitochondrion	mitochondrion	Mitochondrion matrix	0	1.333	0	0
RAB12	Q6IQ22	Ras-related protein Rab-12	The small GTPases Rab are key regulators of intracellular membrane trafficking, from the formation of transport vesicles to their fusion with membranes. Rabs cycle between an inactive GDP-bound form and an active GTP-bound form that is able to recruit to membranes different set of downstream effectors directly responsible for vesicle formation, movement, tethering and fusion. That Rab may play a …	plasma_membrane	unclassified	Recycling endosome membrane ; Lipid-anchor ; Cytoplasmic side	0	1.333	0	0
CYB5R3	P00387	NADH-cytochrome b5 reductase 3	Catalyzes the reduction of two molecules of cytochrome b5 using NADH as the electron donor. .	ER	ER	Endoplasmic reticulum membrane ; Lipid-anchor ; Cytoplasmic side	0	1.333	0	0
CAPN5	O15484	Calpain-5	Calcium-regulated non-lysosomal thiol-protease. .	plasma_membrane	plasma_membrane		0	1.333	0	0
IQGAP3	Q86VI3	Ras GTPase-activating-like protein IQGAP3		plasma_membrane	actin_cytoskeleton		0	1.333	0	0
RHOA	P61586	Transforming protein RhoA	Small GTPase which cycles between an active GTP-bound and an inactive GDP-bound state. Mainly associated with cytoskeleton organization, in active state binds to a variety of effector proteins to regulate cellular responses such as cytoskeletal dynamics, cell migration and cell cycle . Regulates a signal transduction pathway linking plasma membrane receptors to the assembly of focal adhesions and…	plasma_membrane	plasma_membrane	Cell membrane; Lipid-anchor; Cytoplasmic side	1.667	1.333	0	0
PIP5K1C	O60331	Phosphatidylinositol 4-phosphate 5-kinase type-1 gamma P-5-kinase 1 gamma	Catalyzes the phosphorylation of phosphatidylinositol 4-phosphate P/PI4P to form phosphatidylinositol 4,5-bisphosphate P2/PIP2, a lipid second messenger that regulates several cellular processes such as signal transduction, vesicle trafficking, actin cytoskeleton dynamics, cell adhesion, and cell motility . PtdInsP2 can directly act as a second messenger or can be utilized as a precursor to gener…	plasma_membrane	plasma_membrane	Cell membrane; Peripheral membrane protein; Cytoplasmic side	1.667	1.333	0	0
POLR2H	P52434	DNA-directed RNA polymerases I, II, and III subunit RPABC3	DNA-dependent RNA polymerase catalyzes the transcription of DNA into RNA using the four ribonucleoside triphosphates as substrates. Common component of RNA polymerases I, II and III which synthesize ribosomal RNA precursors, mRNA precursors and many functional non-coding RNAs, and small RNAs, such as 5S rRNA and tRNAs, respectively. .	nucleus	unclassified	Nucleus, nucleolus	1.667	1.333	0	0
RPLP1	P05386	Large ribosomal subunit protein P1	Plays an important role in the elongation step of protein synthesis.	translation	translation		1.667	1.333	0	0
NECAP2	Q9NVZ3	Adaptin ear-binding coat-associated protein 2	Involved in endocytosis. .	plasma_membrane	actin_cytoskeleton	Cytoplasmic vesicle, clathrin-coated vesicle membrane	0	1.333	0	2.333
SLC2A1	P11166	Solute carrier family 2, facilitated glucose transporter member 1	Facilitative glucose transporter, which is responsible for constitutive or basal glucose uptake . Has a very broad substrate specificity; can transport a wide range of aldoses including both pentoses and hexoses . Most important energy carrier of the brain: present at the blood-brain barrier and assures the energy-independent, facilitative transport of glucose into the brain . In association with…	plasma_membrane	plasma_membrane	Cell membrane ; Multi-pass membrane protein	0	1.333	0	2.667
MED19	A0JLT2	Mediator of RNA polymerase II transcription subunit 19	Component of the Mediator complex, a coactivator involved in the regulated transcription of nearly all RNA polymerase II-dependent genes. Mediator functions as a bridge to convey information from gene-specific regulatory proteins to the basal RNA polymerase II transcription machinery. Mediator is recruited to promoters by direct interactions with regulatory proteins and serves as a scaffold for t…	nucleus	unclassified	Nucleus	2.667	1.333	0	0
ATP5MF	P56134	ATP synthase subunit f, mitochondrial	Mitochondrial membrane ATP synthase F ATP synthase or Complex V produces ATP from ADP in the presence of a proton gradient across the membrane which is generated by electron transport complexes of the respiratory chain. F-type ATPases consist of two structural domains, F - containing the extramembraneous catalytic core and F - containing the membrane proton channel, linked together by a central s…	mitochondrion	mitochondrion	Mitochondrion	0	1.333	2.333	2.333
NOC3L	Q8WTT2	Nucleolar complex protein 3 homolog	May be required for adipogenesis. .	nucleolus	nucleus	Nucleus, nucleolus	0	1.333	3.333	2.333
PKP4	Q99569	Plakophilin-4	Plays a role as a regulator of Rho activity during cytokinesis. May play a role in junctional plaques. .	plasma_membrane	plasma_membrane	Cell junction, desmosome	0	0	1.667	0
ADGRE5	P48960	Adhesion G protein-coupled receptor E5	Receptor potentially involved in both adhesion and signaling processes early after leukocyte activation. Plays an essential role in leukocyte migration. .	recycling_endosome	plasma_membrane	Cell membrane ; Multi-pass membrane protein	1.667	0	0	0
ITGB5	P18084	Integrin beta-5	Integrin alpha-V/beta-5 is a receptor for fibronectin. It recognizes the sequence R-G-D in its ligand.; Integrin ITGAV:ITGB5 acts as a receptor for adenovirus type C. .	plasma_membrane	plasma_membrane	Cell membrane; Single-pass type I membrane protein	0	0	1.667	0
CDH11	P55287	Cadherin-11	Cadherins are calcium-dependent cell adhesion proteins. They preferentially interact with themselves in a homophilic manner in connecting cells; cadherins may thus contribute to the sorting of heterogeneous cell types. Required for proper focal adhesion assembly . Involved in the regulation of cell migration . .			Cell membrane; Single-pass type I membrane protein	1.667	0	0	0
NEK6	Q9HC98	Serine/threonine-protein kinase Nek6	Protein kinase which plays an important role in mitotic cell cycle progression . Required for chromosome segregation at metaphase-anaphase transition, robust mitotic spindle formation and cytokinesis . Phosphorylates ATF4, CIR1, PTN, RAD26L, RBBP6, RPS7, RPS6KB1, TRIP4, STAT3 and histones H1 and H3 . Phosphorylates KIF11 to promote mitotic spindle formation . Involved in G2/M phase cell cycle arr…			Cytoplasm	1.667	0	0	0
PRKAR2A	P13861	cAMP-dependent protein kinase type II-alpha regulatory subunit	Regulatory subunit of the cAMP-dependent protein kinases involved in cAMP signaling in cells. Type II regulatory chains mediate membrane association by binding to anchoring proteins, including the MAP2 kinase.	unclassified	Golgi	Cytoplasm	0	0	1.667	0
RAB1B	Q9H0U4	Ras-related protein Rab-1B	The small GTPases Rab are key regulators of intracellular membrane trafficking, from the formation of transport vesicles to their fusion with membranes . Rabs cycle between an inactive GDP-bound form and an active GTP-bound form that is able to recruit to membranes different set of downstream effectors directly responsible for vesicle formation, movement, tethering and fusion . Plays a role in th…	Golgi	ERGIC	Cytoplasm	0	0	1.667	0
CCS	O14618	Copper chaperone for superoxide dismutase	Delivers copper to copper zinc superoxide dismutase .	cytosol	cytosol	Cytoplasm	1.667	0	0	0
RAB3GAP1	Q15042	Rab3 GTPase-activating protein catalytic subunit	Catalytic subunit of the Rab3 GTPase-activating complex composed of RAB3GAP1 and RAB3GAP2, which has GTPase-activating protein activity towards various Rab3 subfamily members , RAB5A and RAB43, and guanine nucleotide exchange factor activity towards RAB18 . As part of the Rab3GAP complex, acts as a GAP for Rab3 proteins by converting active RAB3-GTP to the inactive form RAB3-GDP . Rab3 proteins a…	ERGIC	ERGIC	Cytoplasm	1.667	0	0	0
CYTH3	O43739	Cytohesin-3	Promotes guanine-nucleotide exchange on ARF1 and ARF6. Promotes the activation of ARF factors through replacement of GDP with GTP. Plays a role in the epithelial polarization . .			Cytoplasm, cytosol	0	0	1.667	0
COPS5	Q92905	COP9 signalosome complex subunit 5	Probable protease subunit of the COP9 signalosome complex , a complex involved in various cellular and developmental processes. The CSN complex is an essential regulator of the ubiquitin conjugation pathway by mediating the deneddylation of the cullin subunits of the SCF-type E3 ligase complexes, leading to decrease the Ubl ligase activity of SCF-type complexes such as SCF, CSA or DDB2. The compl…	cytosol	unclassified	Cytoplasm, cytosol	0	0	1.667	0
NSDHL	Q15738	Sterol-4-alpha-carboxylate 3-dehydrogenase, decarboxylating	Catalyzes the NAD-dependent oxidative decarboxylation of the C4 methyl groups of 4-alpha-carboxysterols in post-squalene cholesterol biosynthesis . Also plays a role in the regulation of the endocytic trafficking of EGFR . .	ER	ER	Endoplasmic reticulum membrane ; Single-pass membrane protein	0	0	1.667	0
SEC61B	P60468	Protein transport protein Sec61 subunit beta	Component of SEC61 channel-forming translocon complex that mediates transport of signal peptide-containing precursor polypeptides across the endoplasmic reticulum . Forms a ribosome receptor and a gated pore in the ER membrane, both functions required for cotranslational translocation of nascent polypeptides . The SEC61 channel is also involved in ER membrane insertion of transmembrane proteins: …	ER	ER	Endoplasmic reticulum membrane ; Single-pass membrane protein	1.667	0	0	0
ERAP1	Q9NZ08	Endoplasmic reticulum aminopeptidase 1	Aminopeptidase that plays a central role in peptide trimming, a step required for the generation of most HLA class I-binding peptides. Peptide trimming is essential to customize longer precursor peptides to fit them to the correct length required for presentation on MHC class I molecules. Strongly prefers substrates 9-16 residues long. Rapidly degrades 13-mer to a 9-mer and then stops. Preferenti…	ER	ER	Endoplasmic reticulum membrane ; Single-pass type II membrane protein	1.667	0	0	0
RAB2A	P61019	Ras-related protein Rab-2A	The small GTPases Rab are key regulators of intracellular membrane trafficking, from the formation of transport vesicles to their fusion with membranes. Rabs cycle between active GTP-bound and inactive GDP-bound states. In their active state, drive transport of vesicular carriers from donor organelles to acceptor organelles to regulate the membrane traffic that maintains organelle identity and mo…	Golgi	unclassified	Endoplasmic reticulum-Golgi intermediate compartment membrane ; Lipid-anchor	0	0	1.667	0
NCS1	P62166	Neuronal calcium sensor 1	Neuronal calcium sensor, regulator of G protein-coupled receptor phosphorylation in a calcium dependent manner. Directly regulates GRK1 , but not GRK2 to GRK5. Can substitute for calmodulin . Stimulates PI4KB kinase activity . Involved in long-term synaptic plasticity through its interaction with PICK1 . May also play a role in neuron differentiation through inhibition of the activity of N-type v…	plasma_membrane	plasma_membrane	Golgi apparatus	1.667	0	0	0
ARL8A	Q96BM9	ADP-ribosylation factor-like protein 8A	Plays a role in lysosome motility . In neurons, mediates the anterograde axonal long-range transport of presynaptic lysosome-related vesicles required for presynaptic biogenesis and synaptic function . May play a role in chromosome segregation . .	lysosome	lysosome	Late endosome membrane	0	0	1.667	0
VPS37A	Q8NEZ2	Vacuolar protein sorting-associated protein 37A	Component of the ESCRT-I complex, a regulator of vesicular trafficking process. Required for the sorting of endocytic ubiquitinated cargos into multivesicular bodies. May be involved in cell growth and differentiation. .	cytosol	cytosol	Late endosome membrane; Peripheral membrane protein	0	0	1.667	0
DCBLD1	Q8N8Z6	Discoidin, CUB and LCCL domain-containing protein 1		plasma_membrane	plasma_membrane	Membrane ; Single-pass type I membrane protein	0	0	1.667	0
MMP14	P50281	Matrix metalloproteinase-14	Endopeptidase that degrades various components of the extracellular matrix such as collagen. Activates progelatinase A. Essential for pericellular collagenolysis and modeling of skeletal and extraskeletal connective tissues during development . May be involved in actin cytoskeleton reorganization by cleaving PTK7 . Acts as a positive regulator of cell growth and migration via activation of MMP15.…			Membrane ; Single-pass type I membrane protein	0	0	1.667	0
ADPRS	Q9NX46	ADP-ribosylhydrolase ARH3 glycohydrolase ARH3	ADP-ribosylhydrolase that preferentially hydrolyzes the scissile alpha-O-linkage attached to the anomeric C1'' position of ADP-ribose and acts on different substrates, such as proteins ADP-ribosylated on serine and threonine, free poly and O-acetyl-ADP-D-ribose . Specifically acts as a serine mono-ADP-ribosylhydrolase by mediating the removal of mono-ADP-ribose attached to serine residues on prot…	mitochondrion	unclassified	Nucleus	0	0	1.667	0
MRI1	Q9BV20	Methylthioribose-1-phosphate isomerase	Catalyzes the interconversion of methylthioribose-1-phosphate into methylthioribulose-1-phosphate . Independently from catalytic activity, promotes cell invasion in response to constitutive RhoA activation by promoting FAK tyrosine phosphorylation and stress fiber turnover. .	cytosol	Golgi	Nucleus	0	0	1.667	0
SMURF2	Q9HAU4	E3 ubiquitin-protein ligase SMURF2	E3 ubiquitin-protein ligase which accepts ubiquitin from an E2 ubiquitin-conjugating enzyme in the form of a thioester and then directly transfers the ubiquitin to targeted substrates . Interacts with SMAD7 to trigger SMAD7-mediated transforming growth factor beta/TGF-beta receptor ubiquitin-dependent degradation, thereby down-regulating TGF-beta signaling . In addition, interaction with SMAD7 ac…	unclassified	unclassified	Nucleus	0	0	1.667	0
PARP10	Q53GL7	Protein mono-ADP-ribosyltransferase PARP10	ADP-ribosyltransferase that mediates mono-ADP-ribosylation of glutamate and aspartate residues on target proteins . In contrast to PARP1 and PARP2, it is not able to mediate poly-ADP-ribosylation . Catalyzes mono-ADP-ribosylation of GSK3B, leading to negatively regulate GSK3B kinase activity . Involved in translesion DNA synthesis in response to DNA damage via its interaction with PCNA . .			Nucleus, nucleolus	1.667	0	0	0
NRG1	Q02297	Pro-neuregulin-1, membrane-bound isoform	Direct ligand for ERBB3 and ERBB4 tyrosine kinase receptors. Concomitantly recruits ERBB1 and ERBB2 coreceptors, resulting in ligand-stimulated tyrosine phosphorylation and activation of the ERBB receptors. The multiple isoforms perform diverse functions such as inducing growth and differentiation of epithelial, glial, neuronal, and skeletal muscle cells; inducing expression of acetylcholine rece…			Cell membrane; Single-pass type I membrane protein	0	0	1.667	0
CDK5	Q00535	Cyclin-dependent kinase 5	Proline-directed serine/threonine-protein kinase essential for neuronal cell cycle arrest and differentiation and may be involved in apoptotic cell death in neuronal diseases by triggering abortive cell cycle re-entry. Interacts with D1 and D3-type G1 cyclins. Phosphorylates SRC, NOS3, VIM/vimentin, p35/CDK5R1, MEF2A, SIPA1L1, SH3GLB1, PXN, PAK1, MCAM/MUC18, SEPT5, SYN1, DNM1, AMPH, SYNJ1, CDK16,…	cytosol	actin_cytoskeleton	Cytoplasm	0	0	1.667	0
COMT	P21964	Catechol O-methyltransferase	Catalyzes the O-methylation, and thereby the inactivation, of catecholamine neurotransmitters and catechol hormones. Also shortens the biological half-lives of certain neuroactive drugs, like L-DOPA, alpha-methyl DOPA and isoproterenol. .	ER	ER	Cytoplasm	0	0	1.667	0
EIF2B1	Q14232	Translation initiation factor eIF-2B subunit alpha	Catalyzes the exchange of eukaryotic initiation factor 2-bound GDP for GTP.	unclassified	cytosol		0	0	1.667	0
TSC22D2	O75157	TSC22 domain family protein 2	Reduces the level of nuclear PKM isoform M2 which results in repression of cyclin CCND1 transcription and reduced cell growth. .	cytosol	cytosol		0	0	1.667	0
DOCK11	Q5JSL3	Dedicator of cytokinesis protein 11	Guanine nucleotide-exchange factor that activates CDC42 by exchanging bound GDP for free GTP. Required for marginal zone B-cell development, is associated with early bone marrow B-cell development, MZ B-cell formation, MZ B-cell number and marginal metallophilic macrophages morphology. Facilitates filopodia formation through the activation of CDC42. .	actin_cytoskeleton	plasma_membrane		1.667	0	0	0
PBK	Q96KB5	Lymphokine-activated killer T-cell-originated protein kinase	Phosphorylates MAP kinase p38. Seems to be active only in mitosis. May also play a role in the activation of lymphoid cells. When phosphorylated, forms a complex with TP53, leading to TP53 destabilization and attenuation of G2/M checkpoint during doxorubicin-induced DNA damage. .	cytosol	cytosol		1.667	0	0	0
RPS4Y2	Q8TD47	Small ribosomal subunit protein eS4, Y isoform 2					1.667	0	0	0
DVL2	O14641	Segment polarity protein dishevelled homolog DVL-2	Plays a role in the signal transduction pathways mediated by multiple Wnt genes. Participates both in canonical and non-canonical Wnt signaling by binding to the cytoplasmic C-terminus of frizzled family members and transducing the Wnt signal to down-stream effectors. Promotes internalization and degradation of frizzled proteins upon Wnt signaling. .	cytosol	cytosol	Cell membrane ; Peripheral membrane protein ; Cytoplasmic side	2.333	0	0	0
CCNB1	P14635	G2/mitotic-specific cyclin-B1	Essential for the control of the cell cycle at the G2/M transition. .	ER	unclassified	Cytoplasm	0	0	2.333	0
RPL34	P49207	Large ribosomal subunit protein eL34	Component of the large ribosomal subunit . The ribosome is a large ribonucleoprotein complex responsible for the synthesis of proteins in the cell . .	translation	translation	Cytoplasm, cytosol	0	0	2.333	0
CDC42EP3	Q9UKI2	Cdc42 effector protein 3	Probably involved in the organization of the actin cytoskeleton. May act downstream of CDC42 to induce actin filament assembly leading to cell shape changes. Induces pseudopodia formation in fibroblasts. .	unclassified	unclassified	Endomembrane system ; Peripheral membrane protein	2.333	0	0	0
FLCN	Q8NFG4	Folliculin	Multi-functional protein, involved in both the cellular response to amino acid availability and in the regulation of glycolysis . GTPase-activating protein that plays a key role in the cellular response to amino acid availability through regulation of the mTORC1 signaling cascade controlling the MiT/TFE factors TFEB and TFE3 . Regulates glycolysis by binding to lactate dehydrogenase LDHA, acting …	cytosol	cytosol	Lysosome membrane	2.333	0	0	0
MPZL1	O95297	Myelin protein zero-like protein 1	Cell surface receptor, which is involved in signal transduction processes. Recruits PTPN11/SHP-2 to the cell membrane and is a putative substrate of PTPN11/SHP-2. Is a major receptor for concanavalin-A and is involved in cellular signaling induced by ConA, which probably includes Src family tyrosine-protein kinases. Isoform 3 seems to have a dominant negative role; it blocks tyrosine phosphorylat…	plasma_membrane	plasma_membrane	Membrane ; Single-pass type I membrane protein	2.333	0	0	0
LONP1	P36776	Lon protease homolog, mitochondrial	ATP-dependent serine protease that mediates the selective degradation of misfolded, unassembled or oxidatively damaged polypeptides as well as certain short-lived regulatory proteins in the mitochondrial matrix. May also have a chaperone function in the assembly of inner membrane protein complexes. Participates in the regulation of mitochondrial gene expression and in the maintenance of the integ…	mitochondrion	mitochondrion	Mitochondrion matrix	0	0	2.333	0
TBRG4	Q969Z0	FAST kinase domain-containing protein 4	Plays a role in processing of mitochondrial RNA precursors and in stabilization of a subset of mature mitochondrial RNA species, such as MT-CO1, MT-CO2, MT-CYB, MT-CO3, MT-ND3, MT-ND5 and MT-ATP8/6. May play a role in cell cycle progression . .	mitochondrion	mitochondrion	Mitochondrion matrix	0	0	2.333	0
H2AC12	Q96KK5	Histone H2A type 1-H	Core component of nucleosome. Nucleosomes wrap and compact DNA into chromatin, limiting DNA accessibility to the cellular machineries which require DNA as a template. Histones thereby play a central role in transcription regulation, DNA repair, DNA replication and chromosomal stability. DNA accessibility is regulated via a complex set of post-translational modifications of histones, also called h…			Nucleus	2.333	0	0	0
NFIC	P08651	Nuclear factor 1 C-type	Recognizes and binds the palindromic sequence 5'-TTGGCNNNNNGCCAA-3' present in viral and cellular promoters and in the origin of replication of adenovirus type 2. These proteins are individually capable of activating transcription and replication.	nucleus	nucleus	Nucleus	2.333	0	0	0
CMPK1	P30085	UMP-CMP kinase	Catalyzes the phosphorylation of pyrimidine nucleoside monophosphates at the expense of ATP. Plays an important role in de novo pyrimidine nucleotide biosynthesis. Has preference for UMP and CMP as phosphate acceptors. Also displays broad nucleoside diphosphate kinase activity. .	cytosol	unclassified	Nucleus	0	0	2.333	0
KIF14	Q15058	Kinesin-like protein KIF14	Microtubule motor protein that binds to microtubules with high affinity through each tubulin heterodimer and has an ATPase activity . Plays a role in many processes like cell division, cytokinesis and also in cell proliferation and apoptosis . During cytokinesis, targets to central spindle and midbody through its interaction with PRC1 and CIT respectively . Regulates cell growth through regulatio…	actin_cytoskeleton	actin_cytoskeleton	Nucleus	0	0	2.333	0
SERPINE1	P05121	Plasminogen activator inhibitor 1	Serine protease inhibitor. Inhibits TMPRSS7 . Is a primary inhibitor of tissue-type plasminogen activator and urokinase-type plasminogen activator . As PLAT inhibitor, it is required for fibrinolysis down-regulation and is responsible for the controlled degradation of blood clots . As PLAU inhibitor, it is involved in the regulation of cell adhesion and spreading . Acts as a regulator of cell mig…			Secreted	0	0	2.333	0
BGN	P21810	Biglycan	May be involved in collagen fiber assembly. .			Secreted, extracellular space, extracellular matrix	0	0	2.333	0
ANKRD52	Q8NB46	Serine/threonine-protein phosphatase 6 regulatory ankyrin repeat subunit C	Putative regulatory subunit of protein phosphatase 6 that may be involved in the recognition of phosphoprotein substrates.	cytosol	cytosol		2.333	0	0	0
STAT6	P42226	Signal transducer and activator of transcription 6	Carries out a dual signal transduction and activation of transcription. Involved in IL4/interleukin-4- and IL3/interleukin-3-mediated signaling. .	cytosol	cytosol	Cytoplasm	2.667	0	0	0
ARHGAP18	Q8N392	Rho GTPase-activating protein 18	Rho GTPase activating protein that suppresses F-actin polymerization by inhibiting Rho. Rho GTPase activating proteins act by converting Rho-type GTPases to an inactive GDP-bound state . Plays a key role in tissue tension and 3D tissue shape by regulating cortical actomyosin network formation. Acts downstream of YAP1 and inhibits actin polymerization, which in turn reduces nuclear localization of…	cytosol	cytosol	Cytoplasm	2.667	0	0	0
MAP2K1	Q02750	Dual specificity mitogen-activated protein kinase kinase 1	Dual specificity protein kinase which acts as an essential component of the MAP kinase signal transduction pathway. Binding of extracellular ligands such as growth factors, cytokines and hormones to their cell-surface receptors activates RAS and this initiates RAF1 activation. RAF1 then further activates the dual-specificity protein kinases MAP2K1/MEK1 and MAP2K2/MEK2. Both MAP2K1/MEK1 and MAP2K2…	cytosol	cytosol	Cytoplasm, cytoskeleton, microtubule organizing center, centrosome	2.667	0	0	0
ADSL	P30566	Adenylosuccinate lyase	Catalyzes two non-sequential steps in de novo AMP synthesis: converts -2-imidazole-4-carboxamidosuccinate to fumarate plus 5-amino-1-imidazole-4-carboxamide, and thereby also contributes to de novo IMP synthesis, and converts succinyladenosine monophosphate to AMP and fumarate. .	cytosol	cytosol		0	0	2.667	0
PFDN6	O15212	Prefoldin subunit 6	Binds specifically to cytosolic chaperonin and transfers target proteins to it. Binds to nascent polypeptide chain and promotes folding in an environment in which there are many competing pathways for nonnative proteins. .	unclassified	unclassified		2.667	0	0	0
TPRN	Q4KMQ1	Taperin		actin_cytoskeleton	actin_cytoskeleton	Cell projection, stereocilium	3	0	0	0
PPP3CB	P16298	Serine/threonine-protein phosphatase 2B catalytic subunit beta isoform	Calcium-dependent, calmodulin-stimulated protein phosphatase which plays an essential role in the transduction of intracellular Ca-mediated signals . Dephosphorylates TFEB in response to lysosomal Ca release, resulting in TFEB nuclear translocation and stimulation of lysosomal biogenesis . Dephosphorylates and activates transcription factor NFATC1 . Dephosphorylates and inactivates transcription …	cytosol	cytosol	Cytoplasm	3	0	0	0
WBP2	Q969T9	WW domain-binding protein 2	Acts as transcriptional coactivator of estrogen and progesterone receptors upon hormone activation . In presence of estrogen, binds to ESR1-responsive promoters . Required for YAP1 coactivation function on PGR activity . Synergizes with WBP2 in enhancing PGR activity . Modulates expression of post-synaptic scaffolding proteins via regulation of ESR1, ESR2 and PGR . .	early_endosome	lysosome	Cytoplasm	0	0	3.333	0
FMN2	Q9NZ56	Formin-2	Actin-binding protein that is involved in actin cytoskeleton assembly and reorganization . Acts as an actin nucleation factor and promotes assembly of actin filaments together with SPIRE1 and SPIRE2 . Involved in intracellular vesicle transport along actin fibers, providing a novel link between actin cytoskeleton dynamics and intracellular transport . Required for asymmetric spindle positioning, …	plasma_membrane	plasma_membrane	Cytoplasm, cytoskeleton	3.333	0	0	0
RAPGEF6	Q8TEU7	Rap guanine nucleotide exchange factor 6	Guanine nucleotide exchange factor for Rap1A, Rap2A and M-Ras GTPases. Does not interact with cAMP. .	cytosol	unclassified	Cytoplasm	1.667	0	1.667	0
MAGI1	Q96QZ7	Membrane-associated guanylate kinase, WW and PDZ domain-containing protein 1	May play a role as scaffolding protein at cell-cell junctions. May regulate acid-induced ASIC3 currents by modulating its expression at the cell surface . .	unclassified	plasma_membrane	Cell junction, tight junction	3.667	0	0	0
ZDHHC5	Q9C0B5	Palmitoyltransferase ZDHHC5	Palmitoyltransferase that catalyzes the addition of palmitate onto various protein substrates such as CTNND2, CD36, NOD1, NOD2, STAT3 and S1PR1 thus plays a role in various biological processes including cell adhesion, fatty acid uptake, bacterial sensing or cardiac functions . Plays an important role in the regulation of synapse efficacy by mediating palmitoylation of delta-catenin/CTNND2, there…	plasma_membrane	plasma_membrane	Cell membrane ; Multi-pass membrane protein	3.667	0	0	0
PSMC4	P43686	26S proteasome regulatory subunit 6B	Component of the 26S proteasome, a multiprotein complex involved in the ATP-dependent degradation of ubiquitinated proteins. This complex plays a key role in the maintenance of protein homeostasis by removing misfolded or damaged proteins, which could impair cellular functions, and by removing proteins whose functions are no longer required. Therefore, the proteasome participates in numerous cell…	proteasome	cytosol	Cytoplasm	0	0	4	0
PLS1	Q14651	Plastin-1	Actin-bundling protein. In the inner ear, it is required for stereocilia formation. Mediates liquid packing of actin filaments that is necessary for stereocilia to grow to their proper dimensions. .	cytosol	actin_cytoskeleton	Cytoplasm	4	0	0	0
TP53BP2	Q13625	Apoptosis-stimulating of p53 protein 2	Regulator that plays a central role in regulation of apoptosis and cell growth via its interactions with proteins such as TP53 . Regulates TP53 by enhancing the DNA binding and transactivation function of TP53 on the promoters of proapoptotic genes in vivo. Inhibits the ability of NAE1 to conjugate NEDD8 to CUL1, and thereby decreases NAE1 ability to induce apoptosis. Impedes cell cycle progressi…	plasma_membrane	unclassified	Cytoplasm, perinuclear region	4	0	0	0
GPHN	Q9NQX3	Gephyrin	Microtubule-associated protein involved in membrane protein-cytoskeleton interactions. It is thought to anchor the inhibitory glycine receptor to subsynaptic microtubules . Acts as a major instructive molecule at inhibitory synapses, where it also clusters GABA type A receptors . .; Has also a catalytic activity and catalyzes two steps in the biosynthesis of the molybdenum cofactor. In the first …	actin_cytoskeleton	unclassified	Postsynaptic cell membrane ; Lipid-anchor ; Cytoplasmic side	0	0	4	0
ANKRD13A	Q8IZ07	Ankyrin repeat domain-containing protein 13A	Ubiquitin-binding protein that specifically recognizes and binds 'Lys-63'-linked ubiquitin. Does not bind 'Lys-48'-linked ubiquitin. Positively regulates the internalization of ligand-activated EGFR by binding to the Ub moiety of ubiquitinated EGFR at the cell membrane. .	cytosol	cytosol	Cell membrane	4.333	0	0	0
ARHGAP1	Q07960	Rho GTPase-activating protein 1	GTPase activator for the Rho, Rac and Cdc42 proteins, converting them to the putatively inactive GDP-bound state. Cdc42 seems to be the preferred substrate.	cytosol	cytosol	Cytoplasm	4.333	0	0	0
PRPH	P41219	Peripherin	Class-III neuronal intermediate filament protein . May form an independent structural network without the involvement of other neurofilaments or may cooperate with the neuronal intermediate filament proteins NEFL, NEFH, NEFM and INA to form a filamentous network . Assembly of the neuronal intermediate filaments may be regulated by RAB7A . Plays a role in the development of unmyelinated sensory ne…			Cytoplasm, cytoskeleton	4.333	0	0	0
MYO10	Q9HD67	Unconventional myosin-X	Myosins are actin-based motor molecules with ATPase activity. Unconventional myosins serve in intracellular movements. MYO10 binds to actin filaments and actin bundles and functions as a plus end-directed motor. Moves with higher velocity and takes larger steps on actin bundles than on single actin filaments . The tail domain binds to membranous compartments containing phosphatidylinositol 3,4,5-…	plasma_membrane	unclassified	Cytoplasm, cytosol	4.333	0	0	0	4.333
ACAT1	P24752	Acetyl-CoA acetyltransferase, mitochondrial	This is one of the enzymes that catalyzes the last step of the mitochondrial beta-oxidation pathway, an aerobic process breaking down fatty acids into acetyl-CoA . Using free coenzyme A/CoA, catalyzes the thiolytic cleavage of medium- to long-chain 3-oxoacyl-CoAs into acetyl-CoA and a fatty acyl-CoA shortened by two carbon atoms . The activity of the enzyme is reversible and it can also catalyze …	mitochondrion	mitochondrion	Mitochondrion	4.333	0	0	0
IL6ST	P40189	Interleukin-6 receptor subunit beta	Signal-transducing molecule . The receptor systems for IL6, LIF, OSM, CNTF, IL11, CTF1 and BSF3 can utilize IL6ST for initiating signal transmission. Binding of IL6 to IL6R induces IL6ST homodimerization and formation of a high-affinity receptor complex, which activates the intracellular JAK-MAPK and JAK-STAT3 signaling pathways . That causes phosphorylation of IL6ST tyrosine residues which in tu…			Cell membrane ; Single-pass type I membrane protein	4.333	0	0	0	4.333
SDC1	P18827	Syndecan-1	Cell surface proteoglycan that bears both heparan sulfate and chondroitin sulfate and that links the cytoskeleton to the interstitial matrix. Regulates exosome biogenesis in concert with SDCBP and PDCD6IP . .	plasma_membrane	plasma_membrane	Membrane ; Single-pass type I membrane protein	0	0	1.667	2.667
DPM1	O60762	Dolichol-phosphate mannosyltransferase subunit 1	Transfers mannose from GDP-mannose to dolichol monophosphate to form dolichol phosphate mannose which is the mannosyl donor in pathways leading to N-glycosylation, glycosyl phosphatidylinositol membrane anchoring, and O-mannosylation of proteins; catalytic subunit of the dolichol-phosphate mannose synthase complex. .	ER	ER	Endoplasmic reticulum	0	0	2.333	2.333
RAB13	P51153	Ras-related protein Rab-13	The small GTPases Rab are key regulators of intracellular membrane trafficking, from the formation of transport vesicles to their fusion with membranes. Rabs cycle between an inactive GDP-bound form and an active GTP-bound form that is able to recruit to membranes different sets of downstream effectors directly responsible for vesicle formation, movement, tethering and fusion. That Rab is involve…	plasma_membrane	plasma_membrane	Cell membrane ; Lipid-anchor ; Cytoplasmic side	4.667	0	0	0
MYPN	Q86TC9	Myopalladin	Component of the sarcomere that tethers together nebulin and nebulette to alpha-actinin, at the Z lines. .			Cytoplasm	4.667	0	0	0
NUDC	Q9Y266	Nuclear migration protein nudC	Plays a role in neurogenesis and neuronal migration . Necessary for correct formation of mitotic spindles and chromosome separation during mitosis . Necessary for cytokinesis and cell proliferation . .	cytosol	cytosol	Cytoplasm, cytoskeleton	4.667	0	0	0
EIF4A3	P38919	Eukaryotic initiation factor 4A-III	ATP-dependent RNA helicase . Involved in pre-mRNA splicing as component of the spliceosome . Core component of the splicing-dependent multiprotein exon junction complex deposited at splice junctions on mRNAs . The EJC is a dynamic structure consisting of core proteins and several peripheral nuclear and cytoplasmic associated factors that join the complex only transiently either during EJC assembl…	nucleus	unclassified	Nucleus	0	0	4.667	0
NHS	Q6T4R5	Actin remodeling regulator NHS	May function in cell morphology by maintaining the integrity of the circumferential actin ring and controlling lamellipod formation. Involved in the regulation eye, tooth, brain and craniofacial development. .			Apical cell membrane; Peripheral membrane protein	5	0	0	0
PTK2	Q05397	Focal adhesion kinase 1	Non-receptor protein-tyrosine kinase that plays an essential role in regulating cell migration, adhesion, spreading, reorganization of the actin cytoskeleton, formation and disassembly of focal adhesions and cell protrusions, cell cycle progression, cell proliferation and apoptosis. Required for early embryonic development and placenta development. Required for embryonic angiogenesis, normal card…	unclassified	unclassified	Cell junction, focal adhesion	0	0	3	2.333
ACOT7	O00154	Cytosolic acyl coenzyme A thioester hydrolase	Catalyzes the hydrolysis of acyl-CoAs into free fatty acids and coenzyme A , regulating their respective intracellular levels . Preferentially hydrolyzes palmitoyl-CoA, but has a broad specificity acting on other fatty acyl-CoAs with chain-lengths of C8-C18 . May play an important physiological function in brain . .	cytosol	cytosol	Cytoplasm, cytosol	0	0	5.333	0
PCDHGC3	Q9UN70	Protocadherin gamma-C3	Potential calcium-dependent cell-adhesion protein. May be involved in the establishment and maintenance of specific neuronal connections in the brain.			Cell membrane ; Single-pass type I membrane protein	2.333	0	3.333	0
PIK3C2A	O00443	Phosphatidylinositol 4-phosphate 3-kinase C2 domain-containing subunit alpha	Generates phosphatidylinositol 3-phosphate and phosphatidylinositol 3,4-bisphosphate P2 that act as second messengers. Has a role in several intracellular trafficking events. Functions in insulin signaling and secretion. Required for translocation of the glucose transporter SLC2A4/GLUT4 to the plasma membrane and glucose uptake in response to insulin-mediated RHOQ activation. Regulates insulin se…	actin_cytoskeleton	unclassified	Cell membrane	5.667	0	0	0
SNAP23	O00161	Synaptosomal-associated protein 23	Essential component of the high affinity receptor for the general membrane fusion machinery and an important regulator of transport vesicle docking and fusion.	plasma_membrane	plasma_membrane	Cell membrane; Peripheral membrane protein	0	0	5.667	0
FARSA	Q9Y285	Phenylalanine--tRNA ligase alpha subunit		translation	translation	Cytoplasm	0	0	5.667	0
SEPTIN6	Q14141	Septin-6	Filament-forming cytoskeletal GTPase. Required for normal organization of the actin cytoskeleton. Involved in cytokinesis. May play a role in HCV RNA replication. Forms a filamentous structure with SEPTIN12, SEPTIN6, SEPTIN2 and probably SEPTIN4 at the sperm annulus which is required for the structural integrity and motility of the sperm tail during postmeiotic differentiation . .	actin_cytoskeleton	actin_cytoskeleton	Cytoplasm	0	0	6	0
PXN	P49023	Paxillin	Cytoskeletal protein involved in actin-membrane attachment at sites of cell adhesion to the extracellular matrix . Recruits other proteins such as TRIM15 to focal adhesion. .	cytosol	cytosol	Cytoplasm, cytoskeleton	0	0	6	0
DAG1	Q14118	Dystroglycan 1	The dystroglycan complex is involved in a number of processes including laminin and basement membrane assembly, sarcolemmal stability, cell survival, peripheral nerve myelination, nodal structure, cell migration, and epithelial polarization.; : Extracellular peripheral glycoprotein that acts as a receptor for extracellular matrix proteins containing laminin-G domains. Receptor for laminin-2 and a…	plasma_membrane	plasma_membrane	Secreted, extracellular space	3.333	0	0	2.667
PDLIM1	O00151	PDZ and LIM domain protein 1	Cytoskeletal protein that may act as an adapter that brings other proteins to the cytoskeleton . Involved in assembly, disassembly and directioning of stress fibers in fibroblasts. Required for the localization of ACTN1 and PALLD to stress fibers. Required for cell migration and in maintaining cell polarity of fibroblasts . .	plasma_membrane	actin_cytoskeleton	Cytoplasm	0	0	6.333	0
RPL19	P84098	Large ribosomal subunit protein eL19	Component of the large ribosomal subunit . The ribosome is a large ribonucleoprotein complex responsible for the synthesis of proteins in the cell . .	translation	translation	Cytoplasm	0	0	6.333	0
RASA3	Q14644	Ras GTPase-activating protein 3	Inhibitory regulator of the Ras-cyclic AMP pathway. Binds inositol tetrakisphosphate with high affinity. Might be a specific IP4 receptor.	plasma_membrane	actin_cytoskeleton	Cell membrane	4.333	0	2.333	0
SRP68	Q9UHB9	Signal recognition particle subunit SRP68	Component of the signal recognition particle complex, a ribonucleoprotein complex that mediates the cotranslational targeting of secretory and membrane proteins to the endoplasmic reticulum . The SRP complex interacts with the signal sequence in nascent secretory and membrane proteins and directs them to the membrane of the ER . The SRP complex targets the ribosome-nascent chain complex to the SR…	unclassified	ER	Cytoplasm	0	0	4.333	2.333
ATG4B	Q9Y4P1	Cysteine protease ATG4B	Cysteine protease that plays a key role in autophagy by mediating both proteolytic activation and delipidation of ATG8 family proteins . Required for canonical autophagy , non-canonical autophagy as well as for mitophagy . The protease activity is required for proteolytic activation of ATG8 family proteins: cleaves the C-terminal amino acid of ATG8 proteins MAP1LC3A, MAP1LC3B, MAP1LC3C, GABARAPL1…	cytosol	cytosol	Cytoplasm	2.667	0	1.667	2.333
AHCY	P23526	Adenosylhomocysteinase	Catalyzes the hydrolysis of S-adenosyl-L-homocysteine to form adenosine and homocysteine . Binds copper ions . .	cytosol	cytosol	Cytoplasm	6.667	0	0	0
CORO1C	Q9ULV4	Coronin-1C	Plays a role in directed cell migration by regulating the activation and subcellular location of RAC1 . Increases the presence of activated RAC1 at the leading edge of migrating cells . Required for normal organization of the cytoskeleton, including the actin cytoskeleton, microtubules and the vimentin intermediate filaments . Plays a role in endoplasmic reticulum-associated endosome fission: loc…	actin_cytoskeleton	actin_cytoskeleton	Cell membrane ; Peripheral membrane protein ; Cytoplasmic side	0	0	7	0
KIRREL1	Q96J84	Kin of IRRE-like protein 1	Required for proper function of the glomerular filtration barrier. It is involved in the maintenance of a stable podocyte architecture with interdigitating foot processes connected by specialized cell-cell junctions, known as the slit diaphragm . It is a signaling protein that needs the presence of TEC kinases to fully trans-activate the transcription factor AP-1 . .	plasma_membrane	plasma_membrane	Cell membrane ; Single-pass type I membrane protein	4.333	0	2.667	0
MCMBP	Q9BTE3	Mini-chromosome maintenance complex-binding protein	Associated component of the MCM complex that acts as a regulator of DNA replication. Binds to the MCM complex during late S phase and promotes the disassembly of the MCM complex from chromatin, thereby acting as a key regulator of pre-replication complex unloading from replicated DNA. Can dissociate the MCM complex without addition of ATP; probably acts by destabilizing interactions of each indiv…	cytosol	cytosol	Nucleus	7.333	0	0	0
PSMC1	P62191	26S proteasome regulatory subunit 4	Component of the 26S proteasome, a multiprotein complex involved in the ATP-dependent degradation of ubiquitinated proteins. This complex plays a key role in the maintenance of protein homeostasis by removing misfolded or damaged proteins, which could impair cellular functions, and by removing proteins whose functions are no longer required. Therefore, the proteasome participates in numerous cell…	proteasome	cytosol	Cytoplasm	0	0	7.667	0
CLIC4	Q9Y696	Chloride intracellular channel protein 4	Can insert into membranes and form poorly selective ion channels that may also transport chloride ions. Channel activity depends on the pH. Membrane insertion seems to be redox-regulated and may occur only under oxydizing conditions. Promotes cell-surface expression of HRH3. Has alternate cellular functions like a potential role in angiogenesis or in maintaining apical-basolateral membrane polari…	plasma_membrane	plasma_membrane	Cytoplasm, cytoskeleton, microtubule organizing center, centrosome	0	0	7.667	0
RPL11	P62913	Large ribosomal subunit protein uL5	Component of the ribosome, a large ribonucleoprotein complex responsible for the synthesis of proteins in the cell . The small ribosomal subunit binds messenger RNAs and translates the encoded message by selecting cognate aminoacyl-transfer RNA molecules . The large subunit contains the ribosomal catalytic site termed the peptidyl transferase center , which catalyzes the formation of peptide bond…	translation	translation	Nucleus, nucleolus	0	0	8	0
AXL	P30530	Tyrosine-protein kinase receptor UFO	Receptor tyrosine kinase that transduces signals from the extracellular matrix into the cytoplasm by binding growth factor GAS6 and which is thus regulating many physiological processes including cell survival, cell proliferation, migration and differentiation. Ligand binding at the cell surface induces dimerization and autophosphorylation of AXL. Following activation by ligand, AXL binds and ind…			Cell membrane ; Single-pass type I membrane protein	0	0	8.667	0
TXNRD1	Q16881	Thioredoxin reductase 1, cytoplasmic	Reduces disulfideprotein thioredoxin to its dithiol-containing form . Homodimeric flavoprotein involved in the regulation of cellular redox reactions, growth and differentiation. Contains a selenocysteine residue at the C-terminal active site that is essential for catalysis . Also has reductase activity on hydrogen peroxide . .; : Induces actin and tubulin polymerization, leading to formation of …	cytosol	cytosol	Cytoplasm	9	0	0	0
RPS27	P42677	Small ribosomal subunit protein eS27	Component of the small ribosomal subunit . The ribosome is a large ribonucleoprotein complex responsible for the synthesis of proteins in the cell . Required for proper rRNA processing and maturation of 18S rRNAs . Part of the small subunit processome, first precursor of the small eukaryotic ribosomal subunit. During the assembly of the SSU processome in the nucleolus, many ribosome biogenesis fa…	translation	stress_granule	Cytoplasm	0	0	9.333	0
PEAK1	Q9H792	Inactive tyrosine-protein kinase PEAK1	Probable catalytically inactive kinase. Scaffolding protein that regulates the cytoskeleton to control cell spreading and migration by modulating focal adhesion dynamics . Acts as a scaffold for mediating EGFR signaling . .	actin_cytoskeleton	actin_cytoskeleton	Cytoplasm, cytoskeleton	10	0	0	0
GARS1	P41250	Glycine--tRNA ligase	Catalyzes the ATP-dependent ligation of glycine to the 3'-end of its cognate tRNA, via the formation of an aminoacyl-adenylate intermediate . Also produces diadenosine tetraphosphate , a universal pleiotropic signaling molecule needed for cell regulation pathways, by direct condensation of 2 ATPs. Thereby, may play a special role in Ap4A homeostasis . .	mitochondrion	Golgi	Cytoplasm	0	0	10.33	0
PDLIM7	Q9NR12	PDZ and LIM domain protein 7	May function as a scaffold on which the coordinated assembly of proteins can occur. May play a role as an adapter that, via its PDZ domain, localizes LIM-binding proteins to actin filaments of both skeletal muscle and nonmuscle tissues. Involved in both of the two fundamental mechanisms of bone formation, direct bone formation , and endochondral bone formation . Plays a role during fracture repai…	plasma_membrane	actin_cytoskeleton	Cytoplasm	0	0	10.33	0
AP2A2	O94973	AP-2 complex subunit alpha-2	Component of the adaptor protein complex 2 . Adaptor protein complexes function in protein transport via transport vesicles in different membrane traffic pathways. Adaptor protein complexes are vesicle coat components and appear to be involved in cargo selection and vesicle formation. AP-2 is involved in clathrin-dependent endocytosis in which cargo proteins are incorporated into vesicles surroun…	actin_cytoskeleton	unclassified	Cell membrane ; Peripheral membrane protein ; Cytoplasmic side	4.667	0	5.667	0
NCKAP1	Q9Y2A7	Nck-associated protein 1	Part of the WAVE complex that regulates lamellipodia formation. The WAVE complex regulates actin filament reorganization via its interaction with the Arp2/3 complex. Actin remodeling activity is regulated by RAC1. As component of the WAVE1 complex, required for BDNF-NTRK2 endocytic trafficking and signaling from early endosomes. .	actin_cytoskeleton	unclassified	Cell membrane ; Single-pass membrane protein ; Cytoplasmic side	10.67	0	0	0
CSDE1	O75534	Cold shock domain-containing protein E1	RNA-binding protein involved in translationally coupled mRNA turnover . Implicated with other RNA-binding proteins in the cytoplasmic deadenylation/translational and decay interplay of the FOS mRNA mediated by the major coding-region determinant of instability domain . Required for efficient formation of stress granules . .; Required for internal initiation of translation of human rhinovirus RNA.…	stress_granule	stress_granule	Cytoplasm	11	0	0	0
RPS15A	P62244	Small ribosomal subunit protein uS8	Component of the small ribosomal subunit . Part of the small subunit processome, first precursor of the small eukaryotic ribosomal subunit. During the assembly of the SSU processome in the nucleolus, many ribosome biogenesis factors, an RNA chaperone and ribosomal proteins associate with the nascent pre-rRNA and work in concert to generate RNA folding, modifications, rearrangements and cleavage a…	translation	stress_granule	Cytoplasm	0	0	11	0
PPP1R12C	Q9BZL4	Protein phosphatase 1 regulatory subunit 12C	Regulates myosin phosphatase activity. .	plasma_membrane	actin_cytoskeleton	Cytoplasm	11	0	0	0
HSPA1L	P34931	Heat shock 70 kDa protein 1-like	Molecular chaperone implicated in a wide variety of cellular processes, including protection of the proteome from stress, folding and transport of newly synthesized polypeptides, activation of proteolysis of misfolded proteins and the formation and dissociation of protein complexes. Plays a pivotal role in the protein quality control system, ensuring the correct folding of proteins, the re-foldin…				0	0	11.33	0
EIF2S2	P20042	Eukaryotic translation initiation factor 2 subunit 2	Component of the eIF2 complex that functions in the early steps of protein synthesis by forming a ternary complex with GTP and initiator tRNA. This complex binds to a 40S ribosomal subunit, followed by mRNA binding to form the 43S pre-initiation complex . Junction of the 60S ribosomal subunit to form the 80S initiation complex is preceded by hydrolysis of the GTP bound to eIF2 and release of an e…	stress_granule	translation		0	0	6	5.667
TUFM	P49411	Elongation factor Tu, mitochondrial	Promotes the GTP-dependent binding of aminoacyl-tRNA to the A-site of ribosomes during protein biosynthesis. Also plays a role in the regulation of autophagy and innate immunity. Recruits ATG5-ATG12 and NLRX1 at mitochondria and serves as a checkpoint of the RIGI-MAVS pathway. In turn, inhibits RLR-mediated type I interferon while promoting autophagy. .	mitochondrion	mitochondrion	Mitochondrion	12	0	0	0
DLG5	Q8TDM6	Disks large homolog 5	Acts as a regulator of the Hippo signaling pathway . Negatively regulates the Hippo signaling pathway by mediating the interaction of MARK3 with STK3/4, bringing them together to promote MARK3-dependent hyperphosphorylation and inactivation of STK3 kinase activity toward LATS1 . Positively regulates the Hippo signaling pathway by mediating the interaction of SCRIB with STK4/MST1 and LATS1 which i…	plasma_membrane	unclassified	Cell junction	12.33	0	0	0
ENO3	P13929	Beta-enolase	Glycolytic enzyme that catalyzes the conversion of 2-phosphoglycerate to phosphoenolpyruvate. Appears to have a function in striated muscle development and regeneration. .			Cytoplasm	0	0	7	5.333
BCAR3	O75815	Breast cancer anti-estrogen resistance protein 3	Acts as an adapter protein downstream of several growth factor receptors to promote cell proliferation, migration, and redistribution of actin fibers . Specifically involved in INS/insulin signaling pathway by mediating MAPK1/ERK2-MAPK3/ERK1 activation and DNA synthesis . Promotes insulin-mediated membrane ruffling . In response to vasoconstrictor peptide EDN1, involved in the activation of RAP1 …			Cytoplasm	6.667	0	5.667	0
EGFR	P00533	Epidermal growth factor receptor	Receptor tyrosine kinase binding ligands of the EGF family and activating several signaling cascades to convert extracellular cues into appropriate cellular responses . Known ligands include EGF, TGFA/TGF-alpha, AREG, epigen/EPGN, BTC/betacellulin, epiregulin/EREG and HBEGF/heparin-binding EGF . Ligand binding triggers receptor homo- and/or heterodimerization and autophosphorylation on key cytopl…	plasma_membrane	plasma_membrane	Cell membrane ; Single-pass type I membrane protein	13	0	0	0
GMPS	P49915	GMP synthase	Catalyzes the conversion of xanthine monophosphate to GMP in the presence of glutamine and ATP through an adenyl-XMP intermediate. .	cytosol	unclassified	Cytoplasm, cytosol	13	0	0	0
RPL6	Q02878	Large ribosomal subunit protein eL6	Component of the large ribosomal subunit . The ribosome is a large ribonucleoprotein complex responsible for the synthesis of proteins in the cell . .; Specifically binds to domain C of the Tax-responsive enhancer element in the long terminal repeat of HTLV-I . .	translation	translation	Cytoplasm, cytosol	0	0	13.33	0
RAN	P62826	GTP-binding nuclear protein Ran	GTPase involved in nucleocytoplasmic transport, participating both to the import and the export from the nucleus of proteins and RNAs . Switches between a cytoplasmic GDP- and a nuclear GTP-bound state by nucleotide exchange and GTP hydrolysis . Nuclear import receptors such as importin beta bind their substrates only in the absence of GTP-bound RAN and release them upon direct interaction with G…	cytosol	unclassified	Nucleus	0	0	14	0
IPO5	O00410	Importin-5	Functions in nuclear protein import as nuclear transport receptor. Serves as receptor for nuclear localization signals in cargo substrates. Is thought to mediate docking of the importin/substrate complex to the nuclear pore complex through binding to nucleoporin and the complex is subsequently translocated through the pore by an energy requiring, Ran-dependent mechanism. At the nucleoplasmic side…	mitochondrion	Golgi	Cytoplasm	14.33	0	0	0
RPS3A	P61247	Small ribosomal subunit protein eS1	Component of the small ribosomal subunit. The ribosome is a large ribonucleoprotein complex responsible for the synthesis of proteins in the cell . Part of the small subunit processome, first precursor of the small eukaryotic ribosomal subunit. During the assembly of the SSU processome in the nucleolus, many ribosome biogenesis factors, an RNA chaperone and ribosomal proteins associate with the n…	translation	translation	Cytoplasm	0	0	15.67	0
DNMBP	Q6XZF7	Dynamin-binding protein	Plays a critical role as a guanine nucleotide exchange factor for CDC42 in several intracellular processes associated with the actin and microtubule cytoskeleton. Regulates the structure of apical junctions through F-actin organization in epithelial cells . Participates in the normal lumenogenesis of epithelial cell cysts by regulating spindle orientation . Plays a role in ciliogenesis . May play…	actin_cytoskeleton	actin_cytoskeleton	Cytoplasm	15.67	0	0	0
RPS2	P15880	Small ribosomal subunit protein uS5	Component of the ribosome, a large ribonucleoprotein complex responsible for the synthesis of proteins in the cell . The small ribosomal subunit binds messenger RNAs and translates the encoded message by selecting cognate aminoacyl-transfer RNA molecules . The large subunit contains the ribosomal catalytic site termed the peptidyl transferase center , which catalyzes the formation of peptide bond…	translation	translation	Cytoplasm	0	0	16.67	0
TCP1	P17987	T-complex protein 1 subunit alpha	Component of the chaperonin-containing T-complex , a molecular chaperone complex that assists the folding of proteins upon ATP hydrolysis . The TRiC complex mediates the folding of WRAP53/TCAB1, thereby regulating telomere maintenance . As part of the TRiC complex may play a role in the assembly of BBSome, a complex involved in ciliogenesis regulating transports vesicles to the cilia . The TRiC c…	actin_cytoskeleton	actin_cytoskeleton	Cytoplasm, cytosol	0	0	17	0
HNRNPM	P52272	Heterogeneous nuclear ribonucleoprotein M	Pre-mRNA binding protein in vivo, binds avidly to poly and poly RNA homopolymers in vitro. Involved in splicing. Acts as a receptor for carcinoembryonic antigen in Kupffer cells, may initiate a series of signaling events leading to tyrosine phosphorylation of proteins and induction of IL-1 alpha, IL-6, IL-10 and tumor necrosis factor alpha cytokines.	nucleus	unclassified	Nucleus, nucleolus	0	0	18	0
PCBP2	Q15366	Poly-binding protein 2	Single-stranded nucleic acid binding protein that binds preferentially to oligo dC . Major cellular poly-binding protein . Binds also poly . Acts as a negative regulator of antiviral signaling . Negatively regulates cellular antiviral responses mediated by MAVS signaling . It acts as an adapter between MAVS and the E3 ubiquitin ligase ITCH, therefore triggering MAVS ubiquitination and degradation…	unclassified	stress_granule	Nucleus	0	0	9.667	8.667
RPN1	P04843	Dolichyl-diphosphooligosaccharide--protein glycosyltransferase subunit 1	Subunit of the oligosaccharyl transferase complex that catalyzes the initial transfer of a defined glycan ManGlcNAc in eukaryotes from the lipid carrier dolichol-pyrophosphate to an asparagine residue within an Asn-X-Ser/Thr consensus motif in nascent polypeptide chains, the first step in protein N-glycosylation . N-glycosylation occurs cotranslationally and the complex associates with the Sec61 …	ER	ER	Endoplasmic reticulum	0	0	18.67	0
TRAP1	Q12931	Heat shock protein 75 kDa, mitochondrial	Chaperone that expresses an ATPase activity. Involved in maintaining mitochondrial function and polarization, downstream of PINK1 and mitochondrial complex I. Is a negative regulator of mitochondrial respiration able to modulate the balance between oxidative phosphorylation and aerobic glycolysis. The impact of TRAP1 on mitochondrial respiration is probably mediated by modulation of mitochondrial…	mitochondrion	mitochondrion	Mitochondrion	0	0	8	10.67
SLC25A6	P12236	ADP/ATP translocase 3	ADP:ATP antiporter that mediates import of ADP into the mitochondrial matrix for ATP synthesis, and export of ATP out to fuel the cell . Cycles between the cytoplasmic-open state and the matrix-open state : operates by the alternating access mechanism with a single substrate-binding site intermittently exposed to either the cytosolic or matrix side of the inner mitochondrial membrane . In additio…	mitochondrion	mitochondrion	Mitochondrion inner membrane ; Multi-pass membrane protein	0	0	19.33	0
NONO	Q15233	Non-POU domain-containing octamer-binding protein	DNA- and RNA binding protein, involved in several nuclear processes . Binds the conventional octamer sequence in double-stranded DNA . Also binds single-stranded DNA and RNA at a site independent of the duplex site . Involved in pre-mRNA splicing, probably as a heterodimer with SFPQ . Interacts with U5 snRNA, probably by binding to a purine-rich sequence located on the 3' side of U5 snRNA stem 1b…	nucleus	nucleus	Nucleus	0	0	20.33	0
RAB7A	P51149	Ras-related protein Rab-7a	Small GTPase which cycles between active GTP-bound and inactive GDP-bound states. In its active state, binds to a variety of effector proteins playing a key role in the regulation of endo-lysosomal trafficking. Governs early-to-late endosomal maturation, microtubule minus-end as well as plus-end directed endosomal migration and positioning, and endosome-lysosome transport through different protei…	early_endosome	unclassified	Cytoplasmic vesicle, phagosome membrane ; Peripheral membrane protein ; Cytoplasmic side	10.67	0	9.667	0
NIBAN1	Q9BZQ8	Protein Niban 1	Regulates phosphorylation of a number of proteins involved in translation regulation including EIF2A, EIF4EBP1 and RPS6KB1. May be involved in the endoplasmic reticulum stress response . .	unclassified	unclassified	Cytoplasm	12.33	0	9.667	0
GSPT1	P15170	Eukaryotic peptide chain release factor GTP-binding subunit ERF3A	GTPase component of the eRF1-eRF3-GTP ternary complex, a ternary complex that mediates translation termination in response to the termination codons UAA, UAG and UGA . GSPT1/ERF3A mediates ETF1/ERF1 delivery to stop codons: The eRF1-eRF3-GTP complex binds to a stop codon in the ribosomal A-site . GTP hydrolysis by GSPT1/ERF3A induces a conformational change that leads to its dissociation, permitt…	cytosol	unclassified		12.67	0	11.33	0
TAGLN	Q01995	Transgelin	Actin cross-linking/gelling protein . Involved in calcium interactions and contractile properties of the cell that may contribute to replicative senescence. .			Cytoplasm	12.67	0	14.67	0
BASP1	P80723	Brain acid soluble protein 1		plasma_membrane	plasma_membrane	Cell membrane; Lipid-anchor	27.67	0	0	0
ANXA2	P07355	Annexin A2	Calcium-regulated membrane-binding protein whose affinity for calcium is greatly enhanced by anionic phospholipids. It binds two calcium ions with high affinity. May be involved in heat-stress response. Inhibits PCSK9-enhanced LDLR degradation, probably reduces PCSK9 protein levels via a translational mechanism but also competes with LDLR for binding with PCSK9 . .; Binds M.pneumoniae CARDS toxin…	actin_cytoskeleton	unclassified	Secreted, extracellular space, extracellular matrix, basement membrane	0	0	11	17.67
ANXA7	P20073	Annexin A7	Calcium/phospholipid-binding protein which promotes membrane fusion and is involved in exocytosis.	cytosol	stress_granule		12	0	23.67	0
AKAP12	Q02952	A-kinase anchor protein 12	Anchoring protein that mediates the subcellular compartmentation of protein kinase A and protein kinase C .	actin_cytoskeleton	Golgi	Cytoplasm, cell cortex	0	0	46	0
AKAP2	Q9Y2D5	A-kinase anchor protein 2	Binds to regulatory subunit of protein kinase A. May be involved in establishing polarity in signaling systems or in integrating PKA-RII isoforms with downstream effectors to capture, amplify and focus diffuse, trans-cellular signals carried by cAMP . .				29.67	0	28.33	0
XRCC5	P13010	X-ray repair cross-complementing protein 5	Single-stranded DNA-dependent ATP-dependent helicase that plays a key role in DNA non-homologous end joining by recruiting DNA-PK to DNA . Required for double-strand break repair and VJ recombination . Also has a role in chromosome translocation . The DNA helicase II complex binds preferentially to fork-like ends of double-stranded DNA in a cell cycle-dependent manner . It works in the 3'-5' dire…	unclassified	unclassified	Nucleus	22.67	0	22	13.67
TUBA1C	Q9BQE3	Tubulin alpha-1C chain	Tubulin is the major constituent of microtubules, a cylinder consisting of laterally associated linear protofilaments composed of alpha- and beta-tubulin heterodimers. Microtubules grow by the addition of GTP-tubulin dimers to the microtubule end, where a stabilizing cap forms. Below the cap, tubulin dimers are in GDP-bound state, owing to GTPase activity of alpha-tubulin.	cytosol	cytosol	Cytoplasm, cytoskeleton	0	0	60.67	0
ANXA11	P50995	Annexin A11	Binds specifically to calcyclin in a calcium-dependent manner . Required for midbody formation and completion of the terminal phase of cytokinesis. .	cytosol	unclassified	Cytoplasm	0	0	24.67	37
PKM	P14618	Pyruvate kinase PKM	Catalyzes the final rate-limiting step of glycolysis by mediating the transfer of a phosphoryl group from phosphoenolpyruvate to ADP, generating ATP . The ratio between the highly active tetrameric form and nearly inactive dimeric form determines whether glucose carbons are channeled to biosynthetic processes or used for glycolytic ATP production . The transition between the 2 forms contributes t…	cytosol	cytosol	Cytoplasm	0	0	33	39.67
FLNB	O75369	Filamin-B	Connects cell membrane constituents to the actin cytoskeleton. May promote orthogonal branching of actin filaments and links actin filaments to membrane glycoproteins. Anchors various transmembrane proteins to the actin cytoskeleton. Interaction with FLNA may allow neuroblast migration from the ventricular zone into the cortical plate. Various interactions and localizations of isoforms affect myo…	actin_cytoskeleton	actin_cytoskeleton	Cytoplasm, cell cortex	0	0	83	0
IQGAP1	P46940	Ras GTPase-activating-like protein IQGAP1	Plays a crucial role in regulating the dynamics and assembly of the actin cytoskeleton. Binds to activated CDC42 but does not stimulate its GTPase activity. It associates with calmodulin. Could serve as an assembly scaffold for the organization of a multimolecular complex that would interface incoming signals to the reorganization of the actin cytoskeleton at the plasma membrane. May promote neur…	actin_cytoskeleton	unclassified	Cell membrane	58	0	58.33	0
ACTG1	P63261	Actin, cytoplasmic 2	Actins are highly conserved proteins that are involved in various types of cell motility and are ubiquitously expressed in all eukaryotic cells. .	actin_cytoskeleton	unclassified	Cytoplasm, cytoskeleton	0	0	58	61.67
TUBB4B	P68371	Tubulin beta-4B chain	Tubulin is the major constituent of microtubules, a cylinder consisting of laterally associated linear protofilaments composed of alpha- and beta-tubulin heterodimers. Microtubules grow by the addition of GTP-tubulin dimers to the microtubule end, where a stabilizing cap forms. Below the cap, tubulin dimers are in GDP-bound state, owing to GTPase activity of alpha-tubulin.	unclassified	cytosol	Cytoplasm, cytoskeleton	0	0	70.33	65
ACTA2	P62736	Actin, aortic smooth muscle	Actins are highly conserved proteins that are involved in various types of cell motility and are ubiquitously expressed in all eukaryotic cells.			Cytoplasm, cytoskeleton	0	0	136	0
AHNAK	Q09666	Neuroblast differentiation-associated protein AHNAK	May be required for neuronal cell differentiation.	plasma_membrane	plasma_membrane	Nucleus	165.7	0	208.3	0

## Sheet: SC Merlin iso1
Uniprot	Gene	P value	Mean of scMerA-1	Mean of APEX-1	Difference	SE of difference	t ratio	df	q value	-log10(q value)	-log2(q value)	Weight
P35240	NF2	1.8e-05	124.7	0	124.7	5.175	24.09	4	0.007405	2.13	7.077	6.96232
Q09666	AHNAK	0.010295	165.7	110.3	55.33	12.12	4.566	4	0.045936	1.338	4.444	5.78999
Q9Y2J4	AMOTL2	0.000861	36.67	0	36.67	4.096	8.952	4	0.015631	1.806	5.999	5.19653
Q96RT1	ERBIN	0.00118	27.33	4.667	22.67	2.749	8.246	4	0.016255	1.789	5.943	4.50271
P35222	CTNNB1	0.001881	29	8.667	20.33	2.789	7.291	4	0.019614	1.707	5.672	4.34554
P46940	IQGAP1	0.000757	58	38	20	2.16	9.258	4	0.014871	1.828	6.071	4.32193
P13010	XRCC5	0.001174	22.67	4	18.67	2.261	8.257	4	0.016255	1.789	5.943	4.22265
O60716	CTNND1	0.00022	30	12	18	1.414	12.73	4	0.012308	1.91	6.344	4.16993
Q6UVK1	CSPG4	0.000812	22	4.333	17.67	1.944	9.089	4	0.015183	1.819	6.041	4.14323
O75970	MPDZ	0.000995	20.67	3.667	17	1.972	8.621	4	0.016255	1.789	5.943	4.08746
P35221	CTNNA1	0.000255	20	3.667	16.33	1.333	12.25	4	0.012985	1.887	6.267	4.02945
Q9UDY2	TJP2	0.001255	32.67	16.67	16	1.972	8.113	4	0.016255	1.789	5.943	4
Q14160	SCRIB	0.000251	18.67	3.333	15.33	1.247	12.29	4	0.012985	1.887	6.267	3.93829
P80723	BASP1	0.003909	27.67	12.33	15.33	2.56	5.989	4	0.027865	1.555	5.165	3.93829
P15311	EZR	9.1e-05	17.67	2.667	15	0.9428	15.91	4	0.012138	1.916	6.364	3.90689
P46939	UTRN	0.000719	17.67	2.667	15	1.599	9.383	4	0.014393	1.842	6.119	3.90689
O43491	EPB41L2	0.001244	18.67	5.667	13	1.599	8.132	4	0.016255	1.789	5.943	3.70044
Q14847	LASP1	0.002557	21.33	8.667	12.67	1.886	6.718	4	0.021403	1.67	5.546	3.66334
Q12929	EPS8	0.004857	18.33	6	12.33	2.186	5.642	4	0.033214	1.479	4.912	3.6241
P13797	PLS3	0.003126	26.33	14.33	12	1.886	6.364	4	0.023576	1.628	5.407	3.58496
Q15417	CNN3	0.002709	24	12.33	11.67	1.764	6.614	4	0.022444	1.649	5.477	3.54473
Q9P0V3	SH3BP4	0.001923	18.33	7	11.33	1.563	7.249	4	0.019614	1.707	5.672	3.50208
P26038	MSN	0.003016	14.33	3	11.33	1.764	6.425	4	0.023576	1.628	5.407	3.50208
O14974	PPP1R12A	0.000309	18.33	7.333	11	0.9428	11.67	4	0.012985	1.887	6.267	3.45943
Q9Y2D5	PALM2AKAP2	0.000394	29.67	19.33	10.33	0.9428	10.96	4	0.012985	1.887	6.267	3.36877
Q9P273	TENM3	0.00295	11.67	1.333	10.33	1.599	6.464	4	0.023576	1.628	5.407	3.36877
Q15758	SLC1A5	0.000562	12	2	10	1	10	4	0.013105	1.883	6.254	3.32193
P19022	CDH2	0.000828	13.33	3.333	10	1.106	9.045	4	0.0153	1.815	6.03	3.32193
P49588	AARS1	0.000978	19	9	10	1.155	8.66	4	0.016255	1.789	5.943	3.32193
P26006	ITGA3	0.001313	12.33	2.333	10	1.247	8.018	4	0.016255	1.789	5.943	3.32193
Q4VCS5	AMOT	0.000451	9.333	0	9.333	0.8819	10.58	4	0.013105	1.883	6.254	3.22234
P05023	ATP1A1	0.00027	18.33	9.333	9	0.7454	12.07	4	0.012985	1.887	6.267	3.16993
Q9NZN4	EHD2	0.002272	13	4.667	8.333	1.202	6.934	4	0.019654	1.707	5.669	3.05884
Q8IY63	AMOTL1	0.002272	8.333	0	8.333	1.202	6.934	4	0.019654	1.707	5.669	3.05884
P29317	EPHA2	0.000427	8.667	0.6667	8	0.7454	10.73	4	0.013105	1.883	6.254	3
Q8N4C8	MINK1	0.001058	8.667	0.6667	8	0.9428	8.485	4	0.016255	1.789	5.943	3
P22102	GART	0.000326	13	5.333	7.667	0.6667	11.5	4	0.012985	1.887	6.267	2.93866
Q14240	EIF4A2	0.000964	18.67	11	7.667	0.8819	8.693	4	0.016255	1.789	5.943	2.93866
Q12959	DLG1	0.001244	13.33	5.667	7.667	0.9428	8.132	4	0.016255	1.789	5.943	2.93866
O60488	ACSL4	0.000388	7.333	0	7.333	0.6667	11	4	0.012985	1.887	6.267	2.8744
Q8TEW0	PARD3	0.000599	8.667	1.333	7.333	0.7454	9.839	4	0.013105	1.883	6.254	2.8744
Q16513	PKN2	0.001143	12.33	5	7.333	0.8819	8.315	4	0.016255	1.789	5.943	2.8744
Q9BUF5	TUBB6	0.001473	14.67	7.333	7.333	0.9428	7.778	4	0.017903	1.747	5.804	2.8744
Q8TDM6	DLG5	0.005328	12.33	5	7.333	1.333	5.5	4	0.035147	1.454	4.83	2.8744
P00533	EGFR	0.001017	13	6	7	0.8165	8.573	4	0.016255	1.789	5.943	2.80735
Q00587	CDC42EP1	0.003738	8	1	7	1.155	6.062	4	0.027518	1.56	5.184	2.80735
P15170	GSPT1	0.004952	12.67	5.667	7	1.247	5.612	4	0.033724	1.472	4.89	2.80735
Q9Y678	COPG1	0.007016	13.33	6.333	7	1.374	5.093	4	0.036512	1.438	4.775	2.80735
Q96AC1	FERMT2	0.007763	8	1	7	1.414	4.95	4	0.036512	1.438	4.775	2.80735
P06756	ITGAV	0.009338	7.667	0.6667	7	1.491	4.696	4	0.042224	1.374	4.566	2.80735
O14786	NRP1	0.000864	9.333	2.667	6.667	0.7454	8.944	4	0.015631	1.806	5.999	2.73704
Q15436	SEC23A	0.003198	10.67	4	6.667	1.054	6.325	4	0.024016	1.619	5.38	2.73704
Q15678	PTPN14	0.003812	9.333	2.667	6.667	1.106	6.03	4	0.027518	1.56	5.184	2.73704
Q04721	NOTCH2	0.003812	11.33	4.667	6.667	1.106	6.03	4	0.027518	1.56	5.184	2.73704
P54577	YARS1	0.005167	8.667	2	6.667	1.202	5.547	4	0.034904	1.457	4.84	2.73704
O00410	IPO5	0.005905	14.33	7.667	6.667	1.247	5.345	4	0.036512	1.438	4.775	2.73704
P05556	ITGB1	0.000685	12	5.667	6.333	0.6667	9.5	4	0.014056	1.852	6.153	2.66289
Q99704	DOK1	0.001991	6.333	0	6.333	0.8819	7.181	4	0.019614	1.707	5.672	2.66289
P23634	ATP2B4	0.006214	11.33	5	6.333	1.202	5.27	4	0.036512	1.438	4.775	2.66289
P46937	YAP1	0.000484	6	0	6	0.5774	10.39	4	0.013105	1.883	6.254	2.58496
Q01970	PLCB3	0.001826	9	3	6	0.8165	7.348	4	0.019614	1.707	5.672	2.58496
O75815	BCAR3	0.003126	6.667	0.6667	6	0.9428	6.364	4	0.023576	1.628	5.407	2.58496
Q8N3R9	PALS1	0.003883	6	0	6	1	6	4	0.027791	1.556	5.169	2.58496
Q9BZQ8	NIBAN1	0.00559	12.33	6.333	6	1.106	5.427	4	0.036512	1.438	4.775	2.58496
Q96TA1	NIBAN2	0.008581	12.67	6.667	6	1.247	4.811	4	0.039116	1.408	4.676	2.58496
Q7L576	CYFIP1	0.001051	12	6.333	5.667	0.6667	8.5	4	0.016255	1.789	5.943	2.50259
Q16881	TXNRD1	0.001051	9	3.333	5.667	0.6667	8.5	4	0.016255	1.789	5.943	2.50259
P55196	AFDN	0.003016	8.667	3	5.667	0.8819	6.425	4	0.023576	1.628	5.407	2.50259
Q9H792	PEAK1	0.005785	10	4.333	5.667	1.054	5.376	4	0.036512	1.438	4.775	2.50259
Q01995	TAGLN	0.005785	12.67	7	5.667	1.054	5.376	4	0.036512	1.438	4.775	2.50259
Q8NB49	ATP11C	0.001324	5.333	0	5.333	0.6667	8	4	0.016255	1.789	5.943	2.41495
Q15019	SEPTIN2	0.003772	12.33	7	5.333	0.8819	6.047	4	0.027518	1.56	5.184	2.41495
Q9Y2A7	NCKAP1	0.004813	10.67	5.333	5.333	0.9428	5.657	4	0.033042	1.481	4.92	2.41495
P49915	GMPS	0.007182	13	7.667	5.333	1.054	5.06	4	0.036512	1.438	4.775	2.41495
P42356	PI4KA	0.007182	10	4.667	5.333	1.054	5.06	4	0.036512	1.438	4.775	2.41495
P37802	TAGLN2	0.008497	12.67	7.333	5.333	1.106	4.824	4	0.03884	1.411	4.686	2.41495
Q9BZL4	PPP1R12C	0.011355	11	5.667	5.333	1.202	4.438	4	0.04987	1.302	4.326	2.41495
Q9H223	EHD4	0.000978	5	0	5	0.5774	8.66	4	0.016255	1.789	5.943	2.32193
O15357	INPPL1	0.00257	8.667	3.667	5	0.7454	6.708	4	0.021403	1.67	5.546	2.32193
O43353	RIPK2	0.00257	6.333	1.333	5	0.7454	6.708	4	0.021403	1.67	5.546	2.32193
O43592	XPOT	0.003602	8	3	5	0.8165	6.124	4	0.026693	1.574	5.227	2.32193
Q16181	SEPTIN7	0.006074	10.33	5.333	5	0.9428	5.303	4	0.036512	1.438	4.775	2.32193
P20073	ANXA7	0.000151	12	7.333	4.667	0.3333	14	4	0.012138	1.916	6.364	2.2225
Q86TC9	MYPN	0.000151	4.667	0	4.667	0.3333	14	4	0.012138	1.916	6.364	2.2225
P08754	GNAI3	0.000151	7	2.333	4.667	0.3333	14	4	0.012138	1.916	6.364	2.2225
Q13418	ILK	0.00332	9.333	4.667	4.667	0.7454	6.261	4	0.024709	1.607	5.339	2.2225
P55011	SLC12A2	0.000202	4.333	0	4.333	0.3333	13	4	0.012138	1.916	6.364	2.11537
Q96J84	KIRREL1	0.000202	4.333	0	4.333	0.3333	13	4	0.012138	1.916	6.364	2.11537
Q9H2G2	SLK	0.000202	6.333	2	4.333	0.3333	13	4	0.012138	1.916	6.364	2.11537
Q14644	RASA3	0.000202	4.333	0	4.333	0.3333	13	4	0.012138	1.916	6.364	2.11537
Q9HD67	MYO10	0.000202	4.333	0	4.333	0.3333	13	4	0.012138	1.916	6.364	2.11537
P51149	RAB7A	0.000778	10.67	6.333	4.333	0.4714	9.192	4	0.014871	1.828	6.071	2.11537
P32969	RPL9; RPL9P7; RPL9P8; RPL9P9	0.000778	8.667	4.333	4.333	0.4714	9.192	4	0.014871	1.828	6.071	2.11537
Q86SQ0	PHLDB2	0.00289	10.33	6	4.333	0.6667	6.5	4	0.023372	1.631	5.419	2.11537
Q6T4R5	NHS	0.00289	5	0.6667	4.333	0.6667	6.5	4	0.023372	1.631	5.419	2.11537
Q10567	AP1B1	0.004357	9.667	5.333	4.333	0.7454	5.814	4	0.030409	1.517	5.039	2.11537
O75534	CSDE1	0.007966	11	6.667	4.333	0.8819	4.914	4	0.036512	1.438	4.775	2.11537
O43166	SIPA1L1	0.007966	5	0.6667	4.333	0.8819	4.914	4	0.036512	1.438	4.775	2.11537
O14936	CASK	0.007966	5	0.6667	4.333	0.8819	4.914	4	0.036512	1.438	4.775	2.11537
P23458	JAK1	0.007966	5	0.6667	4.333	0.8819	4.914	4	0.036512	1.438	4.775	2.11537
P30626	SRI	0.01006	6.667	2.333	4.333	0.9428	4.596	4	0.045004	1.347	4.474	2.11537
P23528	CFL1	0.001058	9.333	5.333	4	0.4714	8.485	4	0.016255	1.789	5.943	2
Q13625	TP53BP2	0.002278	4	0	4	0.5774	6.928	4	0.019654	1.707	5.669	2
P35241	RDX	0.002278	4	0	4	0.5774	6.928	4	0.019654	1.707	5.669	2
Q8NBF2	NHLRC2	0.002278	4	0	4	0.5774	6.928	4	0.019654	1.707	5.669	2
O94973	AP2A2	0.005821	4.667	0.6667	4	0.7454	5.367	4	0.036512	1.438	4.775	2
Q15334	LLGL1	0.005821	5.333	1.333	4	0.7454	5.367	4	0.036512	1.438	4.775	2
Q00013	MPP1	0.005821	4.667	0.6667	4	0.7454	5.367	4	0.036512	1.438	4.775	2
Q53SF7	COBLL1	0.005821	4.667	0.6667	4	0.7454	5.367	4	0.036512	1.438	4.775	2
Q9C0B5	ZDHHC5	0.000388	3.667	0	3.667	0.3333	11	4	0.012985	1.887	6.267	1.8746
Q13126	MTAP	0.000388	3.667	0	3.667	0.3333	11	4	0.012985	1.887	6.267	1.8746
Q15907	RAB11B	0.000388	3.667	0	3.667	0.3333	11	4	0.012985	1.887	6.267	1.8746
P61225	RAP2B	0.000388	3.667	0	3.667	0.3333	11	4	0.012985	1.887	6.267	1.8746
Q96QZ7	MAGI1	0.000388	3.667	0	3.667	0.3333	11	4	0.012985	1.887	6.267	1.8746
Q8N556	AFAP1	0.005328	7	3.333	3.667	0.6667	5.5	4	0.035147	1.454	4.83	1.8746
Q6XZF7	DNMBP	0.005328	15.67	12	3.667	0.6667	5.5	4	0.035147	1.454	4.83	1.8746
Q96BY6	DOCK10	0.007933	4.333	0.6667	3.667	0.7454	4.919	4	0.036512	1.438	4.775	1.8746
P40189	IL6ST	0.007933	4.333	0.6667	3.667	0.7454	4.919	4	0.036512	1.438	4.775	1.8746
Q8IZ07	ANKRD13A	0.007933	4.333	0.6667	3.667	0.7454	4.919	4	0.036512	1.438	4.775	1.8746
P24752	ACAT1	0.007933	4.333	0.6667	3.667	0.7454	4.919	4	0.036512	1.438	4.775	1.8746
P41219	PRPH	0.007933	4.333	0.6667	3.667	0.7454	4.919	4	0.036512	1.438	4.775	1.8746
Q8IZP0	ABI1	0.000562	3.333	0	3.333	0.3333	10	4	0.013105	1.883	6.254	1.73682
P07947	YES1	0.000562	3.333	0	3.333	0.3333	10	4	0.013105	1.883	6.254	1.73682
Q9NZ56	FMN2	0.000562	3.333	0	3.333	0.3333	10	4	0.013105	1.883	6.254	1.73682
Q4L180	FILIP1L	0.000562	3.333	0	3.333	0.3333	10	4	0.013105	1.883	6.254	1.73682
Q92599	SEPTIN8	0.000562	3.333	0	3.333	0.3333	10	4	0.013105	1.883	6.254	1.73682
P47813	EIF1AX	0.000562	3.333	0	3.333	0.3333	10	4	0.013105	1.883	6.254	1.73682
P22681	CBL	0.000562	6	2.667	3.333	0.3333	10	4	0.013105	1.883	6.254	1.73682
Q8TC07	TBC1D15	0.00749	7	3.667	3.333	0.6667	5	4	0.036512	1.438	4.775	1.73682
Q9Y6M7	SLC4A7	0.00749	3.333	0	3.333	0.6667	5	4	0.036512	1.438	4.775	1.73682
Q14118	DAG1	0.00749	3.333	0	3.333	0.6667	5	4	0.036512	1.438	4.775	1.73682
P31150	GDI1	0.00749	3.333	0	3.333	0.6667	5	4	0.036512	1.438	4.775	1.73682
Q9HA65	TBC1D17	0.00749	4	0.6667	3.333	0.6667	5	4	0.036512	1.438	4.775	1.73682
Q96A65	EXOC4	0.00749	4	0.6667	3.333	0.6667	5	4	0.036512	1.438	4.775	1.73682
P30153	PPP2R1A	0.011056	6.667	3.333	3.333	0.7454	4.472	4	0.048942	1.31	4.353	1.73682
P51153	RAB13	0.011056	4.667	1.333	3.333	0.7454	4.472	4	0.048942	1.31	4.353	1.73682
P55786	NPEPPS	0.003126	5.667	2.667	3	0.4714	6.364	4	0.023576	1.628	5.407	1.58496
Q9BTE3	MCMBP	0.003126	7.333	4.333	3	0.4714	6.364	4	0.023576	1.628	5.407	1.58496
O95671	ASMTL	0.003126	6.333	3.333	3	0.4714	6.364	4	0.023576	1.628	5.407	1.58496
P49411	TUFM	0.006533	12	9	3	0.5774	5.196	4	0.036512	1.438	4.775	1.58496
Q9Y6W5	WASF2	0.006533	3	0	3	0.5774	5.196	4	0.036512	1.438	4.775	1.58496
Q9NPQ8	RIC8A	0.006533	3	0	3	0.5774	5.196	4	0.036512	1.438	4.775	1.58496
O75663	TIPRL	0.006533	3	0	3	0.5774	5.196	4	0.036512	1.438	4.775	1.58496
Q4KMQ1	TPRN	0.006533	3	0	3	0.5774	5.196	4	0.036512	1.438	4.775	1.58496
P08243	ASNS	0.006533	3	0	3	0.5774	5.196	4	0.036512	1.438	4.775	1.58496
P25325	MPST	0.006533	3	0	3	0.5774	5.196	4	0.036512	1.438	4.775	1.58496
P01111	NRAS	0.006533	3	0	3	0.5774	5.196	4	0.036512	1.438	4.775	1.58496
P16298	PPP3CB	0.006533	3	0	3	0.5774	5.196	4	0.036512	1.438	4.775	1.58496
P78324	SIRPA	0.006533	3	0	3	0.5774	5.196	4	0.036512	1.438	4.775	1.58496
O60678	PRMT3	0.006533	3	0	3	0.5774	5.196	4	0.036512	1.438	4.775	1.58496
Q9H9H4	VPS37B	0.001324	4.667	2	2.667	0.3333	8	4	0.016255	1.789	5.943	1.41522
P50395	GDI2	0.001324	4.667	2	2.667	0.3333	8	4	0.016255	1.789	5.943	1.41522
Q02750	MAP2K1	0.001324	2.667	0	2.667	0.3333	8	4	0.016255	1.789	5.943	1.41522
Q8N392	ARHGAP18	0.001324	2.667	0	2.667	0.3333	8	4	0.016255	1.789	5.943	1.41522
Q9Y4P1	ATG4B	0.001324	2.667	0	2.667	0.3333	8	4	0.016255	1.789	5.943	1.41522
P60953	CDC42	0.001324	2.667	0	2.667	0.3333	8	4	0.016255	1.789	5.943	1.41522
Q96SB3	PPP1R9B	0.001324	2.667	0	2.667	0.3333	8	4	0.016255	1.789	5.943	1.41522
A0JLT2	MED19	0.001324	2.667	0	2.667	0.3333	8	4	0.016255	1.789	5.943	1.41522
O15212	PFDN6	0.001324	2.667	0	2.667	0.3333	8	4	0.016255	1.789	5.943	1.41522
P07741	APRT	0.001324	2.667	0	2.667	0.3333	8	4	0.016255	1.789	5.943	1.41522
P42226	STAT6	0.001324	2.667	0	2.667	0.3333	8	4	0.016255	1.789	5.943	1.41522
Q9UN70	PCDHGC3	0.002192	2.333	0	2.333	0.3333	7	4	0.019614	1.707	5.672	1.22219
Q9BQ67	GRWD1	0.002192	2.333	0	2.333	0.3333	7	4	0.019614	1.707	5.672	1.22219
O14641	DVL2	0.002192	2.333	0	2.333	0.3333	7	4	0.019614	1.707	5.672	1.22219
Q9UDY4	DNAJB4	0.002192	2.333	0	2.333	0.3333	7	4	0.019614	1.707	5.672	1.22219
Q96KK5	H2AC12	0.002192	2.333	0	2.333	0.3333	7	4	0.019614	1.707	5.672	1.22219
O76021	RSL1D1	0.002192	2.333	0	2.333	0.3333	7	4	0.019614	1.707	5.672	1.22219
P08651	NFIC	0.002192	2.333	0	2.333	0.3333	7	4	0.019614	1.707	5.672	1.22219
Q9UKI2	CDC42EP3	0.002192	2.333	0	2.333	0.3333	7	4	0.019614	1.707	5.672	1.22219
O14737	PDCD5	0.002192	2.333	0	2.333	0.3333	7	4	0.019614	1.707	5.672	1.22219
Q8NB46	ANKRD52	0.002192	2.333	0	2.333	0.3333	7	4	0.019614	1.707	5.672	1.22219
O95297	MPZL1	0.002192	2.333	0	2.333	0.3333	7	4	0.019614	1.707	5.672	1.22219
Q15750	TAB1	0.002192	2.333	0	2.333	0.3333	7	4	0.019614	1.707	5.672	1.22219
Q8NFG4	FLCN	0.002192	2.333	0	2.333	0.3333	7	4	0.019614	1.707	5.672	1.22219
Q86Y56	DNAAF5	0.002192	2.333	0	2.333	0.3333	7	4	0.019614	1.707	5.672	1.22219
Q86YS7	C2CD5	0.002192	2.333	0	2.333	0.3333	7	4	0.019614	1.707	5.672	1.22219
Q14677	CLINT1	0.002192	2.333	0	2.333	0.3333	7	4	0.019614	1.707	5.672	1.22219
Q9H9A6	LRRC40	0.002192	4.333	2	2.333	0.3333	7	4	0.019614	1.707	5.672	1.22219
O43175	PHGDH	0.002192	7.333	5	2.333	0.3333	7	4	0.019614	1.707	5.672	1.22219
Q01433	AMPD2	0.002192	5.333	3	2.333	0.3333	7	4	0.019614	1.707	5.672	1.22219
Q07960	ARHGAP1	0.002192	4.333	2	2.333	0.3333	7	4	0.019614	1.707	5.672	1.22219
P23526	AHCY	0.007763	6.667	4.333	2.333	0.4714	4.95	4	0.036512	1.438	4.775	1.22219
Q9H694	BICC1	0.007763	5.667	3.333	2.333	0.4714	4.95	4	0.036512	1.438	4.775	1.22219
P36542	ATP5F1C	0.007763	4.667	2.333	2.333	0.4714	4.95	4	0.036512	1.438	4.775	1.22219
O00443	PIK3C2A	0.007763	5.667	3.333	2.333	0.4714	4.95	4	0.036512	1.438	4.775	1.22219
Q9Y266	NUDC	0.00749	4.667	3	1.667	0.3333	5	4	0.036512	1.438	4.775	0.737254
Q8TEU7	RAPGEF6	0.00749	1.667	0	1.667	0.3333	5	4	0.036512	1.438	4.775	0.737254
Q15036	SNX17	0.00749	1.667	0	1.667	0.3333	5	4	0.036512	1.438	4.775	0.737254
P48960	ADGRE5	0.00749	1.667	0	1.667	0.3333	5	4	0.036512	1.438	4.775	0.737254
Q9Y6I3	EPN1	0.00749	1.667	0	1.667	0.3333	5	4	0.036512	1.438	4.775	0.737254
P29353	SHC1	0.00749	1.667	0	1.667	0.3333	5	4	0.036512	1.438	4.775	0.737254
Q9NZ08	ERAP1	0.00749	1.667	0	1.667	0.3333	5	4	0.036512	1.438	4.775	0.737254
Q53GL7	PARP10	0.00749	1.667	0	1.667	0.3333	5	4	0.036512	1.438	4.775	0.737254
P05386	RPLP1	0.00749	1.667	0	1.667	0.3333	5	4	0.036512	1.438	4.775	0.737254
Q9HC98	NEK6	0.00749	1.667	0	1.667	0.3333	5	4	0.036512	1.438	4.775	0.737254
Q8TD47	RPS4Y2	0.00749	1.667	0	1.667	0.3333	5	4	0.036512	1.438	4.775	0.737254
Q5JSL3	DOCK11	0.00749	1.667	0	1.667	0.3333	5	4	0.036512	1.438	4.775	0.737254
Q15042	RAB3GAP1	0.00749	1.667	0	1.667	0.3333	5	4	0.036512	1.438	4.775	0.737254
P52434	POLR2H	0.00749	1.667	0	1.667	0.3333	5	4	0.036512	1.438	4.775	0.737254
P61586	RHOA	0.00749	1.667	0	1.667	0.3333	5	4	0.036512	1.438	4.775	0.737254
P55287	CDH11	0.00749	1.667	0	1.667	0.3333	5	4	0.036512	1.438	4.775	0.737254
O14618	CCS	0.00749	1.667	0	1.667	0.3333	5	4	0.036512	1.438	4.775	0.737254
P60468	SEC61B	0.00749	1.667	0	1.667	0.3333	5	4	0.036512	1.438	4.775	0.737254
P54920	NAPA	0.00749	1.667	0	1.667	0.3333	5	4	0.036512	1.438	4.775	0.737254
Q96KB5	PBK	0.00749	1.667	0	1.667	0.3333	5	4	0.036512	1.438	4.775	0.737254
P62166	NCS1	0.00749	1.667	0	1.667	0.3333	5	4	0.036512	1.438	4.775	0.737254
Q9Y5G0	PCDHGB5	0.00749	1.667	0	1.667	0.3333	5	4	0.036512	1.438	4.775	0.737254
O60331	PIP5K1C	0.00749	1.667	0	1.667	0.3333	5	4	0.036512	1.438	4.775	0.737254
O60884	DNAJA2	0.00749	3.667	2	1.667	0.3333	5	4	0.036512	1.438	4.775	0.737254
Q14651	PLS1	0.00749	4	2.333	1.667	0.3333	5	4	0.036512	1.438	4.775	0.737254

## Sheet: Merlin iso1
Uniprot	Gene	P value	Mean of MerA-1	Mean of APEX-1	Difference	SE of difference	t ratio	df	q value	-log10(q value)	-log2(q value)	Weight
P35240	NF2	<0.000001	52	0	52	1	52	4	0.001361	2.866	9.521	5.70044
P35222	CTNNB1	0.000132	28	8.667	19.33	1.333	14.5	4	0.007001	2.155	7.158	4.27277
P15311	EZR	4e-06	19.33	2.667	16.67	0.4714	35.36	4	0.001588	2.799	9.298	4.05918
P35221	CTNNA1	0.000231	19.33	3.667	15.67	1.247	12.56	4	0.007257	2.139	7.106	3.96993
P06733	ENO1	0.00013	18.33	3	15.33	1.054	14.55	4	0.007001	2.155	7.158	3.93829
Q96RT1	ERBIN	0.001898	20	4.667	15.33	2.108	7.273	4	0.014761	1.831	6.082	3.93829
Q05682	CALD1	0.010205	24.67	9.333	15.33	3.35	4.577	4	0.03471	1.46	4.848	3.93829
Q6UVK1	CSPG4	0.001205	18	4.333	13.67	1.667	8.2	4	0.012952	1.888	6.271	3.77294
Q9Y2J4	AMOTL2	2e-06	13.33	0	13.33	0.3333	40	4	0.001588	2.799	9.298	3.7366
P13797	PLS3	1e-05	27.33	14.33	13	0.4714	27.58	4	0.003421	2.466	8.191	3.70044
O60716	CTNND1	0.004899	25	12	13	2.309	5.629	4	0.025867	1.587	5.273	3.70044
Q14160	SCRIB	0.004983	16	3.333	12.67	2.261	5.603	4	0.026228	1.581	5.253	3.66334
O75970	MPDZ	0.000508	16	3.667	12.33	1.202	10.26	4	0.009255	2.034	6.756	3.6241
O43491	EPB41L2	8.7e-05	17.67	5.667	12	0.7454	16.1	4	0.007001	2.155	7.158	3.58496
Q15417	CNN3	0.00094	24	12.33	11.67	1.333	8.75	4	0.012952	1.888	6.271	3.54473
Q9P273	TENM3	0.00089	12	1.333	10.67	1.202	8.875	4	0.012765	1.894	6.292	3.41549
Q14847	LASP1	0.001485	19.33	8.667	10.67	1.374	7.761	4	0.014114	1.85	6.147	3.41549
P26038	MSN	0.003772	13.67	3	10.67	1.764	6.047	4	0.021195	1.674	5.56	3.41549
Q12929	EPS8	0.001006	16.33	6	10.33	1.202	8.598	4	0.012952	1.888	6.271	3.36877
Q96TA1	NIBAN2	0.001494	17	6.667	10.33	1.333	7.75	4	0.014114	1.85	6.147	3.36877
Q9NZN4	EHD2	0.000447	14.67	4.667	10	0.9428	10.61	4	0.008804	2.055	6.828	3.32193
Q15746	MYLK	0.000828	18.67	8.667	10	1.106	9.045	4	0.012076	1.918	6.372	3.32193
Q96AC1	FERMT2	0.001482	10.33	1	9.333	1.202	7.766	4	0.014114	1.85	6.147	3.22234
P46939	UTRN	0.010007	12	2.667	9.333	2.028	4.603	4	0.034388	1.464	4.862	3.22234
P09619	PDGFRB	0.000673	9.667	0.6667	9	0.9428	9.546	4	0.010455	1.981	6.58	3.16993
P26006	ITGA3	0.001956	11.33	2.333	9	1.247	7.216	4	0.014761	1.831	6.082	3.16993
P19022	CDH2	0.001956	12.33	3.333	9	1.247	7.216	4	0.014761	1.831	6.082	3.16993
Q12955	ANK3	0.007966	8.667	0	8.667	1.764	4.914	4	0.027952	1.554	5.161	3.11553
P06756	ITGAV	0.000236	9	0.6667	8.333	0.6667	12.5	4	0.007257	2.139	7.106	3.05884
O14974	PPP1R12A	0.000364	15.67	7.333	8.333	0.7454	11.18	4	0.008172	2.088	6.935	3.05884
P29317	EPHA2	0.0007	9	0.6667	8.333	0.8819	9.449	4	0.010482	1.98	6.576	3.05884
Q7L576	CYFIP1	0.003736	14.67	6.333	8.333	1.374	6.063	4	0.021195	1.674	5.56	3.05884
P42356	PI4KA	0.000388	12	4.667	7.333	0.6667	11	4	0.008172	2.088	6.935	2.8744
O15357	INPPL1	0.001143	11	3.667	7.333	0.8819	8.315	4	0.012952	1.888	6.271	2.8744
Q13683	ITGA7	0.001143	7.333	0	7.333	0.8819	8.315	4	0.012952	1.888	6.271	2.8744
P05556	ITGB1	0.002243	13	5.667	7.333	1.054	6.957	4	0.014919	1.826	6.067	2.8744
P54577	YARS1	0.00365	9.333	2	7.333	1.202	6.102	4	0.020863	1.681	5.583	2.8744
P48444	ARCN1	0.007246	10.33	3	7.333	1.453	5.047	4	0.027441	1.562	5.188	2.8744
P55786	NPEPPS	0.000716	9.667	2.667	7	0.7454	9.391	4	0.010637	1.973	6.555	2.80735
P55196	AFDN	0.001017	10	3	7	0.8165	8.573	4	0.012952	1.888	6.271	2.80735
O14786	NRP1	0.001757	9.667	2.667	7	0.9428	7.425	4	0.014761	1.831	6.082	2.80735
Q04721	NOTCH2	0.003185	11.67	4.667	7	1.106	6.332	4	0.018521	1.732	5.755	2.80735
Q01970	PLCB3	0.003738	10	3	7	1.155	6.062	4	0.021195	1.674	5.56	2.80735
Q9Y678	COPG1	0.007016	13.33	6.333	7	1.374	5.093	4	0.027441	1.562	5.188	2.80735
P22102	GART	0.011886	12.33	5.333	7	1.599	4.379	4	0.039937	1.399	4.646	2.80735
O60488	ACSL4	0.001641	6.667	0	6.667	0.8819	7.559	4	0.014761	1.831	6.082	2.73704
Q5JSH3	WDR44	0.001641	10.67	4	6.667	0.8819	7.559	4	0.014761	1.831	6.082	2.73704
P17301	ITGA2	0.002111	8.333	1.667	6.667	0.9428	7.071	4	0.014761	1.831	6.082	2.73704
Q9UDY2	TJP2	0.002111	23.33	16.67	6.667	0.9428	7.071	4	0.014761	1.831	6.082	2.73704
Q0ZGT2	NEXN	0.005167	8.667	2	6.667	1.202	5.547	4	0.027024	1.568	5.21	2.73704
P49588	AARS1	0.00749	15.67	9	6.667	1.333	5	4	0.027441	1.562	5.188	2.73704
Q8NB49	ATP11C	4.5e-05	6.333	0	6.333	0.3333	19	4	0.007001	2.155	7.158	2.66289
Q14195	DPYSL3	0.000178	14.67	8.333	6.333	0.4714	13.44	4	0.007001	2.155	7.158	2.66289
Q8IY63	AMOTL1	0.001991	6.333	0	6.333	0.8819	7.181	4	0.014761	1.831	6.082	2.66289
Q15436	SEC23A	0.001991	10.33	4	6.333	0.8819	7.181	4	0.014761	1.831	6.082	2.66289
Q9P265	DIP2B	0.001991	6.333	0	6.333	0.8819	7.181	4	0.014761	1.831	6.082	2.66289
P55285	CDH6	0.003863	9.333	3	6.333	1.054	6.008	4	0.021487	1.668	5.54	2.66289
Q8TEW0	PARD3	0.004597	7.667	1.333	6.333	1.106	5.729	4	0.024744	1.607	5.337	2.66289
Q12959	DLG1	0.006214	12	5.667	6.333	1.202	5.27	4	0.027441	1.562	5.188	2.66289
P50454	SERPINH1	0.019104	19	12.67	6.333	1.667	3.8	4	0.048732	1.312	4.359	2.66289
Q4VCS5	AMOT	0.000484	6	0	6	0.5774	10.39	4	0.009255	2.034	6.756	2.58496
P32969	RPL9; RPL9P7; RPL9P8; RPL9P9	0.001293	10.33	4.333	6	0.7454	8.05	4	0.012952	1.888	6.271	2.58496
Q8N4C8	MINK1	0.001293	6.667	0.6667	6	0.7454	8.05	4	0.012952	1.888	6.271	2.58496
P08758	ANXA5	0.003126	10.33	4.333	6	0.9428	6.364	4	0.01824	1.739	5.777	2.58496
O60701	UGDH	0.003126	13.67	7.667	6	0.9428	6.364	4	0.01824	1.739	5.777	2.58496
Q9NPQ8	RIC8A	0.003883	6	0	6	1	6	4	0.021525	1.667	5.538	2.58496
P20936	RASA1	0.006533	10	4	6	1.155	5.196	4	0.027441	1.562	5.188	2.58496
Q9P0V3	SH3BP4	0.017133	13	7	6	1.528	3.928	4	0.044111	1.355	4.503	2.58496
P46937	YAP1	7e-05	5.667	0	5.667	0.3333	17	4	0.007001	2.155	7.158	2.50259
Q15907	RAB11B	7e-05	5.667	0	5.667	0.3333	17	4	0.007001	2.155	7.158	2.50259
O43592	XPOT	0.001051	8.667	3	5.667	0.6667	8.5	4	0.012952	1.888	6.271	2.50259
Q86UU1	PHLDB1	0.001606	9.333	3.667	5.667	0.7454	7.603	4	0.014761	1.831	6.082	2.50259
P62070	RRAS2	0.001606	8.333	2.667	5.667	0.7454	7.603	4	0.014761	1.831	6.082	2.50259
O43166	SIPA1L1	0.001606	6.333	0.6667	5.667	0.7454	7.603	4	0.014761	1.831	6.082	2.50259
Q9NRY4	ARHGAP35	0.005785	11	5.333	5.667	1.054	5.376	4	0.027441	1.562	5.188	2.50259
P11586	MTHFD1	0.005785	17	11.33	5.667	1.054	5.376	4	0.027441	1.562	5.188	2.50259
Q92609	TBC1D5	0.006859	6.333	0.6667	5.667	1.106	5.126	4	0.027441	1.562	5.188	2.50259
P37802	TAGLN2	0.009206	13	7.333	5.667	1.202	4.715	4	0.031832	1.497	4.973	2.50259
Q9Y4G6	TLN2	0.013158	9.667	4	5.667	1.333	4.25	4	0.041457	1.382	4.592	2.50259
Q99704	DOK1	0.01754	5.667	0	5.667	1.453	3.9	4	0.045038	1.346	4.473	2.50259
P23634	ATP2B4	8.9e-05	10.33	5	5.333	0.3333	16	4	0.007001	2.155	7.158	2.41495
O95721	SNAP29	8.9e-05	5.333	0	5.333	0.3333	16	4	0.007001	2.155	7.158	2.41495
O15031	PLXNB2	8.9e-05	5.333	0	5.333	0.3333	16	4	0.007001	2.155	7.158	2.41495
Q15678	PTPN14	0.001324	8	2.667	5.333	0.6667	8	4	0.012952	1.888	6.271	2.41495
O14936	CASK	0.001324	6	0.6667	5.333	0.6667	8	4	0.012952	1.888	6.271	2.41495
Q9P206	KIAA1522	0.001324	5.333	0	5.333	0.6667	8	4	0.012952	1.888	6.271	2.41495
P29323	EPHB2	0.001324	5.333	0	5.333	0.6667	8	4	0.012952	1.888	6.271	2.41495
P62081	RPS7	0.000978	5	0	5	0.5774	8.66	4	0.012952	1.888	6.271	2.32193
Q15758	SLC1A5	0.000978	7	2	5	0.5774	8.66	4	0.012952	1.888	6.271	2.32193
Q8IZ21	PHACTR4	0.000978	5	0	5	0.5774	8.66	4	0.012952	1.888	6.271	2.32193
P27824	CANX	0.00257	8.333	3.333	5	0.7454	6.708	4	0.016442	1.784	5.926	2.32193
P23528	CFL1	0.00257	10.33	5.333	5	0.7454	6.708	4	0.016442	1.784	5.926	2.32193
Q13418	ILK	0.00257	9.667	4.667	5	0.7454	6.708	4	0.016442	1.784	5.926	2.32193
Q9BQG0	MYBBP1A	0.003602	9	4	5	0.8165	6.124	4	0.020659	1.685	5.597	2.32193
Q13177	PAK2	0.00749	5	0	5	1	5	4	0.027441	1.562	5.188	2.32193
Q00587	CDC42EP1	0.00749	6	1	5	1	5	4	0.027441	1.562	5.188	2.32193
P48643	CCT5	0.016011	7.333	2.333	5	1.247	4.009	4	0.041593	1.381	4.588	2.32193
Q9H9A6	LRRC40	0.000151	6.667	2	4.667	0.3333	14	4	0.007001	2.155	7.158	2.2225
Q15019	SEPTIN2	0.000151	11.67	7	4.667	0.3333	14	4	0.007001	2.155	7.158	2.2225
O95671	ASMTL	0.000151	8	3.333	4.667	0.3333	14	4	0.007001	2.155	7.158	2.2225
P43490	NAMPT	0.000584	8.333	3.667	4.667	0.4714	9.899	4	0.009346	2.029	6.741	2.2225
Q7L014	DDX46	0.002192	10	5.333	4.667	0.6667	7	4	0.014761	1.831	6.082	2.2225
Q9UDY4	DNAJB4	0.002192	4.667	0	4.667	0.6667	7	4	0.014761	1.831	6.082	2.2225
Q92598	HSPH1	0.002192	11.67	7	4.667	0.6667	7	4	0.014761	1.831	6.082	2.2225
Q96A65	EXOC4	0.00332	5.333	0.6667	4.667	0.7454	6.261	4	0.019238	1.716	5.7	2.2225
Q96CV9	OPTN	0.006122	4.667	0	4.667	0.8819	5.292	4	0.027441	1.562	5.188	2.2225
P52306	RAP1GDS1	0.006122	4.667	0	4.667	0.8819	5.292	4	0.027441	1.562	5.188	2.2225
Q9H4M9	EHD1	0.011447	7.667	3	4.667	1.054	4.427	4	0.038539	1.414	4.698	2.2225
Q8TC07	TBC1D15	0.000202	8	3.667	4.333	0.3333	13	4	0.007001	2.155	7.158	2.11537
Q92692	NECTIN2	0.000202	4.333	0	4.333	0.3333	13	4	0.007001	2.155	7.158	2.11537
O00186	STXBP3	0.000202	4.333	0	4.333	0.3333	13	4	0.007001	2.155	7.158	2.11537
P15559	NQO1	0.000202	4.333	0	4.333	0.3333	13	4	0.007001	2.155	7.158	2.11537
P10586	PTPRF	0.000202	4.333	0	4.333	0.3333	13	4	0.007001	2.155	7.158	2.11537
P60953	CDC42	0.000202	4.333	0	4.333	0.3333	13	4	0.007001	2.155	7.158	2.11537
P22061	PCMT1	0.000202	4.333	0	4.333	0.3333	13	4	0.007001	2.155	7.158	2.11537
Q9UIW2	PLXNA1	0.000202	4.333	0	4.333	0.3333	13	4	0.007001	2.155	7.158	2.11537
Q5VT25	CDC42BPA	0.000202	4.333	0	4.333	0.3333	13	4	0.007001	2.155	7.158	2.11537
Q96P48	ARAP1	0.000202	4.333	0	4.333	0.3333	13	4	0.007001	2.155	7.158	2.11537
O14908	GIPC1	0.004357	5.667	1.333	4.333	0.7454	5.814	4	0.023603	1.627	5.405	2.11537
Q8NDI1	EHBP1	0.004357	6.667	2.333	4.333	0.7454	5.814	4	0.023603	1.627	5.405	2.11537
Q15334	LLGL1	0.004357	5.667	1.333	4.333	0.7454	5.814	4	0.023603	1.627	5.405	2.11537
O00231	PSMD11	0.004357	5.667	1.333	4.333	0.7454	5.814	4	0.023603	1.627	5.405	2.11537
P62820	RAB1A	0.007966	9.333	5	4.333	0.8819	4.914	4	0.027952	1.554	5.161	2.11537
Q96BY6	DOCK10	0.007966	5	0.6667	4.333	0.8819	4.914	4	0.027952	1.554	5.161	2.11537
P11234	RALB	0.007966	4.333	0	4.333	0.8819	4.914	4	0.027952	1.554	5.161	2.11537
P50570	DNM2	0.01006	9.667	5.333	4.333	0.9428	4.596	4	0.034427	1.463	4.86	2.11537
Q10567	AP1B1	0.01006	9.667	5.333	4.333	0.9428	4.596	4	0.034427	1.463	4.86	2.11537
P08754	GNAI3	0.001058	6.333	2.333	4	0.4714	8.485	4	0.012952	1.888	6.271	2
P61204	ARF3	0.001058	11.67	7.667	4	0.4714	8.485	4	0.012952	1.888	6.271	2
P55011	SLC12A2	0.002278	4	0	4	0.5774	6.928	4	0.014919	1.826	6.067	2
Q9H223	EHD4	0.002278	4	0	4	0.5774	6.928	4	0.014919	1.826	6.067	2
O95248	SBF1	0.002278	4	0	4	0.5774	6.928	4	0.014919	1.826	6.067	2
O60749	SNX2	0.002278	4	0	4	0.5774	6.928	4	0.014919	1.826	6.067	2
Q9H694	BICC1	0.005821	7.333	3.333	4	0.7454	5.367	4	0.027441	1.562	5.188	2
Q86SQ0	PHLDB2	0.00805	10	6	4	0.8165	4.899	4	0.02801	1.553	5.158	2
P23458	JAK1	0.013236	4.667	0.6667	4	0.9428	4.243	4	0.041457	1.382	4.592	2
O15067	PFAS	0.013236	4.667	0.6667	4	0.9428	4.243	4	0.041457	1.382	4.592	2
Q14934	NFATC4	0.013236	4.667	0.6667	4	0.9428	4.243	4	0.041457	1.382	4.592	2
Q9BUF5	TUBB6	0.013236	11.33	7.333	4	0.9428	4.243	4	0.041457	1.382	4.592	2
Q9Y6I3	EPN1	0.01613	4	0	4	1	4	4	0.041593	1.381	4.588	2
P50395	GDI2	0.000388	5.667	2	3.667	0.3333	11	4	0.008172	2.088	6.935	1.8746
P11216	PYGB	0.000388	9.667	6	3.667	0.3333	11	4	0.008172	2.088	6.935	1.8746
O43175	PHGDH	0.000388	8.667	5	3.667	0.3333	11	4	0.008172	2.088	6.935	1.8746
P41240	CSK	0.000388	3.667	0	3.667	0.3333	11	4	0.008172	2.088	6.935	1.8746
P00568	AK1	0.000388	3.667	0	3.667	0.3333	11	4	0.008172	2.088	6.935	1.8746
Q9Y6M7	SLC4A7	0.000388	3.667	0	3.667	0.3333	11	4	0.008172	2.088	6.935	1.8746
Q96SB3	PPP1R9B	0.000388	3.667	0	3.667	0.3333	11	4	0.008172	2.088	6.935	1.8746
P61225	RAP2B	0.000388	3.667	0	3.667	0.3333	11	4	0.008172	2.088	6.935	1.8746
Q86Y56	DNAAF5	0.000388	3.667	0	3.667	0.3333	11	4	0.008172	2.088	6.935	1.8746
Q9GZT4	SRR	0.000388	3.667	0	3.667	0.3333	11	4	0.008172	2.088	6.935	1.8746
O60678	PRMT3	0.000388	3.667	0	3.667	0.3333	11	4	0.008172	2.088	6.935	1.8746
P40227	CCT6A	0.001473	7.333	3.667	3.667	0.4714	7.778	4	0.014114	1.85	6.147	1.8746
Q16513	PKN2	0.005328	8.667	5	3.667	0.6667	5.5	4	0.027441	1.562	5.188	1.8746
O95782	AP2A1	0.005328	8.667	5	3.667	0.6667	5.5	4	0.027441	1.562	5.188	1.8746
Q7Z6B7	SRGAP1	0.007933	6.333	2.667	3.667	0.7454	4.919	4	0.027952	1.554	5.161	1.8746
Q13596	SNX1	0.007933	4.333	0.6667	3.667	0.7454	4.919	4	0.027952	1.554	5.161	1.8746
Q53SF7	COBLL1	0.007933	4.333	0.6667	3.667	0.7454	4.919	4	0.027952	1.554	5.161	1.8746
Q9HA65	TBC1D17	0.007933	4.333	0.6667	3.667	0.7454	4.919	4	0.027952	1.554	5.161	1.8746
Q96NE9	FRMD6	0.014173	6.667	3	3.667	0.8819	4.158	4	0.041593	1.381	4.588	1.8746
Q8IZP0	ABI1	0.014173	3.667	0	3.667	0.8819	4.158	4	0.041593	1.381	4.588	1.8746
P33527	ABCC1	0.014173	3.667	0	3.667	0.8819	4.158	4	0.041593	1.381	4.588	1.8746
Q9UPT5	EXOC7	0.014173	3.667	0	3.667	0.8819	4.158	4	0.041593	1.381	4.588	1.8746
Q9Y6W5	WASF2	0.000562	3.333	0	3.333	0.3333	10	4	0.009255	2.034	6.756	1.73682
Q9NUU7	DDX19A	0.000562	3.333	0	3.333	0.3333	10	4	0.009255	2.034	6.756	1.73682
Q8WUD1	RAB2B	0.000562	3.333	0	3.333	0.3333	10	4	0.009255	2.034	6.756	1.73682
Q9NZW5	PALS2	0.000562	3.333	0	3.333	0.3333	10	4	0.009255	2.034	6.756	1.73682
P46108	CRK	0.000562	3.333	0	3.333	0.3333	10	4	0.009255	2.034	6.756	1.73682
P30626	SRI	0.002111	5.667	2.333	3.333	0.4714	7.071	4	0.014761	1.831	6.082	1.73682
P05023	ATP1A1	0.002111	12.67	9.333	3.333	0.4714	7.071	4	0.014761	1.831	6.082	1.73682
O14964	HGS	0.00749	10.33	7	3.333	0.6667	5	4	0.027441	1.562	5.188	1.73682
Q14019	COTL1	0.00749	3.333	0	3.333	0.6667	5	4	0.027441	1.562	5.188	1.73682
O76021	RSL1D1	0.00749	3.333	0	3.333	0.6667	5	4	0.027441	1.562	5.188	1.73682
Q9NQ66	PLCB1	0.00749	3.333	0	3.333	0.6667	5	4	0.027441	1.562	5.188	1.73682
P31150	GDI1	0.00749	3.333	0	3.333	0.6667	5	4	0.027441	1.562	5.188	1.73682
Q0JRZ9	FCHO2	0.00749	3.333	0	3.333	0.6667	5	4	0.027441	1.562	5.188	1.73682
Q9Y6R0	NUMBL	0.00749	3.333	0	3.333	0.6667	5	4	0.027441	1.562	5.188	1.73682
P09493	TPM1	0.00749	3.333	0	3.333	0.6667	5	4	0.027441	1.562	5.188	1.73682
P61764	STXBP1	0.00749	3.333	0	3.333	0.6667	5	4	0.027441	1.562	5.188	1.73682
Q9P035	HACD3	0.00749	4	0.6667	3.333	0.6667	5	4	0.027441	1.562	5.188	1.73682
P50148	GNAQ	0.00749	4	0.6667	3.333	0.6667	5	4	0.027441	1.562	5.188	1.73682
Q00013	MPP1	0.00749	4	0.6667	3.333	0.6667	5	4	0.027441	1.562	5.188	1.73682
P53004	BLVRA	0.00749	4	0.6667	3.333	0.6667	5	4	0.027441	1.562	5.188	1.73682
P61981	YWHAG	0.011056	4.667	1.333	3.333	0.7454	4.472	4	0.037301	1.428	4.745	1.73682
Q15691	MAPRE1	0.011056	4.667	1.333	3.333	0.7454	4.472	4	0.037301	1.428	4.745	1.73682
Q9UNZ2	NSFL1C	0.019442	4	0.6667	3.333	0.8819	3.78	4	0.049142	1.309	4.347	1.73682
O95352	ATG7	0.019442	4	0.6667	3.333	0.8819	3.78	4	0.049142	1.309	4.347	1.73682
Q92558	WASF1	0.019442	3.333	0	3.333	0.8819	3.78	4	0.049142	1.309	4.347	1.73682
O43301	HSPA12A	0.019442	5	1.667	3.333	0.8819	3.78	4	0.049142	1.309	4.347	1.73682
Q16181	SEPTIN7	0.003126	8.333	5.333	3	0.4714	6.364	4	0.01824	1.739	5.777	1.58496
P08648	ITGA5	0.003126	7.333	4.333	3	0.4714	6.364	4	0.01824	1.739	5.777	1.58496
Q06323	PSME1	0.003126	7.333	4.333	3	0.4714	6.364	4	0.01824	1.739	5.777	1.58496
Q14240	EIF4A2	0.006533	14	11	3	0.5774	5.196	4	0.027441	1.562	5.188	1.58496
Q6NYC8	PPP1R18	0.006533	9	6	3	0.5774	5.196	4	0.027441	1.562	5.188	1.58496
Q8N3R9	PALS1	0.006533	3	0	3	0.5774	5.196	4	0.027441	1.562	5.188	1.58496
Q9H2G2	SLK	0.006533	5	2	3	0.5774	5.196	4	0.027441	1.562	5.188	1.58496
Q99829	CPNE1	0.006533	3	0	3	0.5774	5.196	4	0.027441	1.562	5.188	1.58496
Q01433	AMPD2	0.006533	6	3	3	0.5774	5.196	4	0.027441	1.562	5.188	1.58496
Q96D71	REPS1	0.006533	3	0	3	0.5774	5.196	4	0.027441	1.562	5.188	1.58496
P35241	RDX	0.006533	3	0	3	0.5774	5.196	4	0.027441	1.562	5.188	1.58496
Q9Y5L0	TNPO3	0.006533	3	0	3	0.5774	5.196	4	0.027441	1.562	5.188	1.58496
Q4L180	FILIP1L	0.006533	3	0	3	0.5774	5.196	4	0.027441	1.562	5.188	1.58496
O94887	FARP2	0.006533	3	0	3	0.5774	5.196	4	0.027441	1.562	5.188	1.58496
Q8TDN6	BRIX1	0.006533	3	0	3	0.5774	5.196	4	0.027441	1.562	5.188	1.58496
Q9H6S0	YTHDC2	0.006533	3	0	3	0.5774	5.196	4	0.027441	1.562	5.188	1.58496
P98172	EFNB1	0.006533	3	0	3	0.5774	5.196	4	0.027441	1.562	5.188	1.58496
P09525	ANXA4	0.006533	3	0	3	0.5774	5.196	4	0.027441	1.562	5.188	1.58496
Q7L7X3	TAOK1	0.006533	3	0	3	0.5774	5.196	4	0.027441	1.562	5.188	1.58496
Q6V0I7	FAT4	0.006533	3	0	3	0.5774	5.196	4	0.027441	1.562	5.188	1.58496
P15121	AKR1B1	0.006533	3	0	3	0.5774	5.196	4	0.027441	1.562	5.188	1.58496
P60983	GMFB	0.006533	3	0	3	0.5774	5.196	4	0.027441	1.562	5.188	1.58496
Q13057	COASY	0.006533	3	0	3	0.5774	5.196	4	0.027441	1.562	5.188	1.58496
Q96KG9	SCYL1	0.006533	3	0	3	0.5774	5.196	4	0.027441	1.562	5.188	1.58496
Q96RF0	SNX18	0.0158	5.667	2.667	3	0.7454	4.025	4	0.041593	1.381	4.588	1.58496
Q9Y4E8	USP15	0.0158	8.667	5.667	3	0.7454	4.025	4	0.041593	1.381	4.588	1.58496
Q92888	ARHGEF1	0.0158	3.667	0.6667	3	0.7454	4.025	4	0.041593	1.381	4.588	1.58496
P62330	ARF6	0.0158	3.667	0.6667	3	0.7454	4.025	4	0.041593	1.381	4.588	1.58496
P11274	BCR	0.0158	3.667	0.6667	3	0.7454	4.025	4	0.041593	1.381	4.588	1.58496
Q96PD2	DCBLD2	0.0158	3.667	0.6667	3	0.7454	4.025	4	0.041593	1.381	4.588	1.58496
P29401	TKT	0.001324	5.667	3	2.667	0.3333	8	4	0.012952	1.888	6.271	1.41522
P30153	PPP2R1A	0.001324	6	3.333	2.667	0.3333	8	4	0.012952	1.888	6.271	1.41522
P62277	RPS13	0.001324	2.667	0	2.667	0.3333	8	4	0.012952	1.888	6.271	1.41522
P27701	CD82	0.001324	2.667	0	2.667	0.3333	8	4	0.012952	1.888	6.271	1.41522
P08243	ASNS	0.001324	2.667	0	2.667	0.3333	8	4	0.012952	1.888	6.271	1.41522
O75340	PDCD6	0.001324	2.667	0	2.667	0.3333	8	4	0.012952	1.888	6.271	1.41522
P07947	YES1	0.001324	2.667	0	2.667	0.3333	8	4	0.012952	1.888	6.271	1.41522
P29353	SHC1	0.001324	2.667	0	2.667	0.3333	8	4	0.012952	1.888	6.271	1.41522
Q9Y4F1	FARP1	0.001324	2.667	0	2.667	0.3333	8	4	0.012952	1.888	6.271	1.41522
O95819	MAP4K4	0.001324	2.667	0	2.667	0.3333	8	4	0.012952	1.888	6.271	1.41522
Q14156	EFR3A	0.001324	2.667	0	2.667	0.3333	8	4	0.012952	1.888	6.271	1.41522
P54760	EPHB4	0.001324	2.667	0	2.667	0.3333	8	4	0.012952	1.888	6.271	1.41522
P35237	SERPINB6	0.001324	2.667	0	2.667	0.3333	8	4	0.012952	1.888	6.271	1.41522
Q9NYB9	ABI2	0.001324	2.667	0	2.667	0.3333	8	4	0.012952	1.888	6.271	1.41522
Q13492	PICALM	0.004813	9.333	6.667	2.667	0.4714	5.657	4	0.025573	1.592	5.289	1.41522
Q9NUQ6	SPATS2L	0.01613	4	1.333	2.667	0.6667	4	4	0.041593	1.381	4.588	1.41522
O43353	RIPK2	0.01613	4	1.333	2.667	0.6667	4	4	0.041593	1.381	4.588	1.41522
P52209	PGD	0.01613	5.667	3	2.667	0.6667	4	4	0.041593	1.381	4.588	1.41522
Q8N556	AFAP1	0.01613	6	3.333	2.667	0.6667	4	4	0.041593	1.381	4.588	1.41522
Q96P70	IPO9	0.01613	5	2.333	2.667	0.6667	4	4	0.041593	1.381	4.588	1.41522
P36507	MAP2K2	0.01613	2.667	0	2.667	0.6667	4	4	0.041593	1.381	4.588	1.41522
Q13126	MTAP	0.01613	2.667	0	2.667	0.6667	4	4	0.041593	1.381	4.588	1.41522
Q9H4G0	EPB41L1	0.01613	2.667	0	2.667	0.6667	4	4	0.041593	1.381	4.588	1.41522
Q16658	FSCN1	0.01613	2.667	0	2.667	0.6667	4	4	0.041593	1.381	4.588	1.41522
Q15036	SNX17	0.01613	2.667	0	2.667	0.6667	4	4	0.041593	1.381	4.588	1.41522
Q13155	AIMP2	0.01613	2.667	0	2.667	0.6667	4	4	0.041593	1.381	4.588	1.41522
P51570	GALK1	0.01613	2.667	0	2.667	0.6667	4	4	0.041593	1.381	4.588	1.41522
P01111	NRAS	0.01613	2.667	0	2.667	0.6667	4	4	0.041593	1.381	4.588	1.41522
Q9UI15	TAGLN3	0.01613	2.667	0	2.667	0.6667	4	4	0.041593	1.381	4.588	1.41522
Q12979	ABR	0.01613	2.667	0	2.667	0.6667	4	4	0.041593	1.381	4.588	1.41522
P47813	EIF1AX	0.01613	2.667	0	2.667	0.6667	4	4	0.041593	1.381	4.588	1.41522
Q15750	TAB1	0.01613	2.667	0	2.667	0.6667	4	4	0.041593	1.381	4.588	1.41522
O75146	HIP1R	0.01613	2.667	0	2.667	0.6667	4	4	0.041593	1.381	4.588	1.41522
Q9Y6Q2	STON1	0.01613	2.667	0	2.667	0.6667	4	4	0.041593	1.381	4.588	1.41522
P78524	DENND2B	0.01613	2.667	0	2.667	0.6667	4	4	0.041593	1.381	4.588	1.41522
Q96RU3	FNBP1	0.01613	2.667	0	2.667	0.6667	4	4	0.041593	1.381	4.588	1.41522
P51911	CNN1	0.01613	2.667	0	2.667	0.6667	4	4	0.041593	1.381	4.588	1.41522
Q460N5	PARP14	0.01613	2.667	0	2.667	0.6667	4	4	0.041593	1.381	4.588	1.41522
Q9NZM3	ITSN2	0.01613	2.667	0	2.667	0.6667	4	4	0.041593	1.381	4.588	1.41522
Q86VP6	CAND1	0.01613	12	9.333	2.667	0.6667	4	4	0.041593	1.381	4.588	1.41522
Q99439	CNN2	0.002192	8.333	6	2.333	0.3333	7	4	0.014761	1.831	6.082	1.22219
Q9NZI8	IGF2BP1	0.002192	2.333	0	2.333	0.3333	7	4	0.014761	1.831	6.082	1.22219
O75663	TIPRL	0.002192	2.333	0	2.333	0.3333	7	4	0.014761	1.831	6.082	1.22219
O00232	PSMD12	0.002192	2.333	0	2.333	0.3333	7	4	0.014761	1.831	6.082	1.22219
P04350	TUBB4A	0.002192	2.333	0	2.333	0.3333	7	4	0.014761	1.831	6.082	1.22219
P25325	MPST	0.002192	2.333	0	2.333	0.3333	7	4	0.014761	1.831	6.082	1.22219
P20020	ATP2B1	0.002192	2.333	0	2.333	0.3333	7	4	0.014761	1.831	6.082	1.22219
Q13617	CUL2	0.002192	2.333	0	2.333	0.3333	7	4	0.014761	1.831	6.082	1.22219
Q92599	SEPTIN8	0.002192	2.333	0	2.333	0.3333	7	4	0.014761	1.831	6.082	1.22219
Q8NBF2	NHLRC2	0.002192	2.333	0	2.333	0.3333	7	4	0.014761	1.831	6.082	1.22219
Q9Y371	SH3GLB1	0.002192	2.333	0	2.333	0.3333	7	4	0.014761	1.831	6.082	1.22219
O15498	YKT6	0.002192	2.333	0	2.333	0.3333	7	4	0.014761	1.831	6.082	1.22219
Q9BTE6	AARSD1	0.002192	2.333	0	2.333	0.3333	7	4	0.014761	1.831	6.082	1.22219
P54920	NAPA	0.002192	2.333	0	2.333	0.3333	7	4	0.014761	1.831	6.082	1.22219
Q9UBT7	CTNNAL1	0.002192	2.333	0	2.333	0.3333	7	4	0.014761	1.831	6.082	1.22219
Q86YS7	C2CD5	0.002192	2.333	0	2.333	0.3333	7	4	0.014761	1.831	6.082	1.22219
P78324	SIRPA	0.002192	2.333	0	2.333	0.3333	7	4	0.014761	1.831	6.082	1.22219
Q14677	CLINT1	0.002192	2.333	0	2.333	0.3333	7	4	0.014761	1.831	6.082	1.22219
Q14554	PDIA5	0.002192	2.333	0	2.333	0.3333	7	4	0.014761	1.831	6.082	1.22219
P00492	HPRT1	0.002192	6	3.667	2.333	0.3333	7	4	0.014761	1.831	6.082	1.22219
Q9UNF0	PACSIN2	0.002192	5.333	3	2.333	0.3333	7	4	0.014761	1.831	6.082	1.22219
Q86XL3	ANKLE2	0.002192	4.333	2	2.333	0.3333	7	4	0.014761	1.831	6.082	1.22219
P39656	DDOST	0.002192	4.333	2	2.333	0.3333	7	4	0.014761	1.831	6.082	1.22219
Q99832	CCT7	0.007763	6.667	4.333	2.333	0.4714	4.95	4	0.027952	1.554	5.161	1.22219
Q9Y5X1	SNX9	0.013236	10.33	8.333	2	0.4714	4.243	4	0.041457	1.382	4.592	1
Q12965	MYO1E	0.013236	6.667	4.667	2	0.4714	4.243	4	0.041457	1.382	4.592	1
O00148	DDX39A	0.013236	6.333	4.333	2	0.4714	4.243	4	0.041457	1.382	4.592	1
P50991	CCT4	0.013236	5.667	3.667	2	0.4714	4.243	4	0.041457	1.382	4.592	1
P22681	CBL	0.013236	4.667	2.667	2	0.4714	4.243	4	0.041457	1.382	4.592	1
P19174	PLCG1	0.013236	5.667	3.667	2	0.4714	4.243	4	0.041457	1.382	4.592	1
P17858	PFKL	0.013236	5.667	3.667	2	0.4714	4.243	4	0.041457	1.382	4.592	1
P07951	TPM2	0.013236	4.667	2.667	2	0.4714	4.243	4	0.041457	1.382	4.592	1
O14579	COPE	0.013236	4.333	2.333	2	0.4714	4.243	4	0.041457	1.382	4.592	1
P36542	ATP5F1C	0.013236	4.333	2.333	2	0.4714	4.243	4	0.041457	1.382	4.592	1
Q99816	TSG101	0.00749	6.667	5	1.667	0.3333	5	4	0.027441	1.562	5.188	0.737254
Q8IVF7	FMNL3	0.00749	1.667	0	1.667	0.3333	5	4	0.027441	1.562	5.188	0.737254
O76003	GLRX3	0.00749	6	4.333	1.667	0.3333	5	4	0.027441	1.562	5.188	0.737254
Q9BQ67	GRWD1	0.00749	1.667	0	1.667	0.3333	5	4	0.027441	1.562	5.188	0.737254
Q9Y4G8	RAPGEF2	0.00749	1.667	0	1.667	0.3333	5	4	0.027441	1.562	5.188	0.737254
F8W7C6	RPL10	0.00749	1.667	0	1.667	0.3333	5	4	0.027441	1.562	5.188	0.737254
Q7Z6J0	SH3RF1	0.00749	1.667	0	1.667	0.3333	5	4	0.027441	1.562	5.188	0.737254
P11233	RALA	0.00749	1.667	0	1.667	0.3333	5	4	0.027441	1.562	5.188	0.737254
P50552	VASP	0.00749	1.667	0	1.667	0.3333	5	4	0.027441	1.562	5.188	0.737254
P08581	MET	0.00749	1.667	0	1.667	0.3333	5	4	0.027441	1.562	5.188	0.737254
P52594	AGFG1	0.00749	1.667	0	1.667	0.3333	5	4	0.027441	1.562	5.188	0.737254
Q9H6U6	BCAS3	0.00749	1.667	0	1.667	0.3333	5	4	0.027441	1.562	5.188	0.737254
P62834	RAP1A	0.00749	1.667	0	1.667	0.3333	5	4	0.027441	1.562	5.188	0.737254
P61026	RAB10	0.00749	1.667	0	1.667	0.3333	5	4	0.027441	1.562	5.188	0.737254
Q9H845	ACAD9	0.00749	1.667	0	1.667	0.3333	5	4	0.027441	1.562	5.188	0.737254
Q765P7	MTSS2	0.00749	1.667	0	1.667	0.3333	5	4	0.027441	1.562	5.188	0.737254
P61201	COPS2	0.00749	1.667	0	1.667	0.3333	5	4	0.027441	1.562	5.188	0.737254
Q15286	RAB35	0.00749	1.667	0	1.667	0.3333	5	4	0.027441	1.562	5.188	0.737254
Q9Y478	PRKAB1	0.00749	1.667	0	1.667	0.3333	5	4	0.027441	1.562	5.188	0.737254
P0DJJ0	SRGAP2C	0.00749	1.667	0	1.667	0.3333	5	4	0.027441	1.562	5.188	0.737254
Q9UID3	VPS51	0.00749	1.667	0	1.667	0.3333	5	4	0.027441	1.562	5.188	0.737254
O14737	PDCD5	0.00749	1.667	0	1.667	0.3333	5	4	0.027441	1.562	5.188	0.737254
P25787	PSMA2	0.00749	1.667	0	1.667	0.3333	5	4	0.027441	1.562	5.188	0.737254
P17931	LGALS3	0.00749	1.667	0	1.667	0.3333	5	4	0.027441	1.562	5.188	0.737254
P07741	APRT	0.00749	1.667	0	1.667	0.3333	5	4	0.027441	1.562	5.188	0.737254
Q9NXU5	ARL15	0.00749	1.667	0	1.667	0.3333	5	4	0.027441	1.562	5.188	0.737254
O15111	CHUK	0.00749	1.667	0	1.667	0.3333	5	4	0.027441	1.562	5.188	0.737254
Q96AG4	LRRC59	0.00749	1.667	0	1.667	0.3333	5	4	0.027441	1.562	5.188	0.737254
O60831	PRAF2	0.00749	1.667	0	1.667	0.3333	5	4	0.027441	1.562	5.188	0.737254
O14933	UBE2L6	0.00749	1.667	0	1.667	0.3333	5	4	0.027441	1.562	5.188	0.737254
P04080	CSTB	0.00749	1.667	0	1.667	0.3333	5	4	0.027441	1.562	5.188	0.737254
Q6PGP7	SKIC3	0.00749	1.667	0	1.667	0.3333	5	4	0.027441	1.562	5.188	0.737254
Q15262	PTPRK	0.00749	1.667	0	1.667	0.3333	5	4	0.027441	1.562	5.188	0.737254
Q9NZ09	UBAP1	0.00749	1.667	0	1.667	0.3333	5	4	0.027441	1.562	5.188	0.737254
O43318	MAP3K7	0.00749	1.667	0	1.667	0.3333	5	4	0.027441	1.562	5.188	0.737254
Q96S59	RANBP9	0.00749	1.667	0	1.667	0.3333	5	4	0.027441	1.562	5.188	0.737254
O75832	PSMD10	0.00749	1.667	0	1.667	0.3333	5	4	0.027441	1.562	5.188	0.737254
Q8IWW6	ARHGAP12	0.00749	1.667	0	1.667	0.3333	5	4	0.027441	1.562	5.188	0.737254
P19634	SLC9A1	0.00749	1.667	0	1.667	0.3333	5	4	0.027441	1.562	5.188	0.737254
Q99747	NAPG	0.00749	1.667	0	1.667	0.3333	5	4	0.027441	1.562	5.188	0.737254
P49247	RPIA	0.00749	1.667	0	1.667	0.3333	5	4	0.027441	1.562	5.188	0.737254
Q9UET6	FTSJ1	0.00749	1.667	0	1.667	0.3333	5	4	0.027441	1.562	5.188	0.737254
Q5T160	RARS2	0.00749	1.667	0	1.667	0.3333	5	4	0.027441	1.562	5.188	0.737254
P84085	ARF5	0.00749	1.667	0	1.667	0.3333	5	4	0.027441	1.562	5.188	0.737254
Q07812	BAX	0.00749	1.667	0	1.667	0.3333	5	4	0.027441	1.562	5.188	0.737254
Q13618	CUL3	0.00749	1.667	0	1.667	0.3333	5	4	0.027441	1.562	5.188	0.737254
Q9Y5G0	PCDHGB5	0.00749	1.667	0	1.667	0.3333	5	4	0.027441	1.562	5.188	0.737254
Q14790	CASP8	0.00749	1.667	0	1.667	0.3333	5	4	0.027441	1.562	5.188	0.737254
P09417	QDPR	0.00749	1.667	0	1.667	0.3333	5	4	0.027441	1.562	5.188	0.737254
O43399	TPD52L2	0.00749	1.667	0	1.667	0.3333	5	4	0.027441	1.562	5.188	0.737254
O60884	DNAJA2	0.00749	3.667	2	1.667	0.3333	5	4	0.027441	1.562	5.188	0.737254
Q13509	TUBB3	0.00749	4	2.333	1.667	0.3333	5	4	0.027441	1.562	5.188	0.737254
Q9H9H4	VPS37B	0.00749	3.667	2	1.667	0.3333	5	4	0.027441	1.562	5.188	0.737254
P04899	GNAI2	0.00749	4	2.333	1.667	0.3333	5	4	0.027441	1.562	5.188	0.737254
Q02978	SLC25A11	0.00749	4	2.333	1.667	0.3333	5	4	0.027441	1.562	5.188	0.737254
Q99497	PARK7	0.00749	3.667	2	1.667	0.3333	5	4	0.027441	1.562	5.188	0.737254
Q9NNW5	WDR6	0.01613	3.333	2	1.333	0.3333	4	4	0.041593	1.381	4.588	0.414677
Q8IXS6	PALM2AKAP2	0.01613	4	2.667	1.333	0.3333	4	4	0.041593	1.381	4.588	0.414677
P61158	ACTR3	0.01613	4	2.667	1.333	0.3333	4	4	0.041593	1.381	4.588	0.414677
O95232	LUC7L3	0.01613	4	2.667	1.333	0.3333	4	4	0.041593	1.381	4.588	0.414677
Q8WTT2	NOC3L	0.01613	1.333	0	1.333	0.3333	4	4	0.041593	1.381	4.588	0.414677
P56134	ATP5MF	0.01613	1.333	0	1.333	0.3333	4	4	0.041593	1.381	4.588	0.414677
Q96IF1	AJUBA	0.01613	1.333	0	1.333	0.3333	4	4	0.041593	1.381	4.588	0.414677
P11166	SLC2A1	0.01613	1.333	0	1.333	0.3333	4	4	0.041593	1.381	4.588	0.414677
Q14738	PPP2R5D	0.01613	4	2.667	1.333	0.3333	4	4	0.041593	1.381	4.588	0.414677
P40261	NNMT	0.01613	1.333	0	1.333	0.3333	4	4	0.041593	1.381	4.588	0.414677
Q9NVZ3	NECAP2	0.01613	1.333	0	1.333	0.3333	4	4	0.041593	1.381	4.588	0.414677
P43007	SLC1A4	0.01613	1.333	0	1.333	0.3333	4	4	0.041593	1.381	4.588	0.414677
P21283	ATP6V1C1	0.01613	1.333	0	1.333	0.3333	4	4	0.041593	1.381	4.588	0.414677
P19623	SRM	0.01613	4	2.667	1.333	0.3333	4	4	0.041593	1.381	4.588	0.414677
Q6IQ22	RAB12	0.01613	1.333	0	1.333	0.3333	4	4	0.041593	1.381	4.588	0.414677
P14735	IDE	0.01613	1.333	0	1.333	0.3333	4	4	0.041593	1.381	4.588	0.414677
P05386	RPLP1	0.01613	1.333	0	1.333	0.3333	4	4	0.041593	1.381	4.588	0.414677
A0JLT2	MED19	0.01613	1.333	0	1.333	0.3333	4	4	0.041593	1.381	4.588	0.414677
O75439	PMPCB	0.01613	1.333	0	1.333	0.3333	4	4	0.041593	1.381	4.588	0.414677
P07858	CTSB	0.01613	1.333	0	1.333	0.3333	4	4	0.041593	1.381	4.588	0.414677
Q9C035	TRIM5	0.01613	1.333	0	1.333	0.3333	4	4	0.041593	1.381	4.588	0.414677
P52434	POLR2H	0.01613	1.333	0	1.333	0.3333	4	4	0.041593	1.381	4.588	0.414677
P06241	FYN	0.01613	1.333	0	1.333	0.3333	4	4	0.041593	1.381	4.588	0.414677
P61586	RHOA	0.01613	1.333	0	1.333	0.3333	4	4	0.041593	1.381	4.588	0.414677
O15145	ARPC3	0.01613	1.333	0	1.333	0.3333	4	4	0.041593	1.381	4.588	0.414677
Q9BY32	ITPA	0.01613	1.333	0	1.333	0.3333	4	4	0.041593	1.381	4.588	0.414677
Q96KP1	EXOC2	0.01613	1.333	0	1.333	0.3333	4	4	0.041593	1.381	4.588	0.414677
Q96CT7	CCDC124	0.01613	1.333	0	1.333	0.3333	4	4	0.041593	1.381	4.588	0.414677
Q9NP79	VTA1	0.01613	1.333	0	1.333	0.3333	4	4	0.041593	1.381	4.588	0.414677
O15484	CAPN5	0.01613	1.333	0	1.333	0.3333	4	4	0.041593	1.381	4.588	0.414677
Q9UHR4	BAIAP2L1	0.01613	1.333	0	1.333	0.3333	4	4	0.041593	1.381	4.588	0.414677
P00387	CYB5R3	0.01613	1.333	0	1.333	0.3333	4	4	0.041593	1.381	4.588	0.414677
O75695	RP2	0.01613	1.333	0	1.333	0.3333	4	4	0.041593	1.381	4.588	0.414677
P48426	PIP4K2A	0.01613	1.333	0	1.333	0.3333	4	4	0.041593	1.381	4.588	0.414677
Q86VI3	IQGAP3	0.01613	1.333	0	1.333	0.3333	4	4	0.041593	1.381	4.588	0.414677
Q9NVJ2	ARL8B	0.01613	1.333	0	1.333	0.3333	4	4	0.041593	1.381	4.588	0.414677
Q13641	TPBG	0.01613	1.333	0	1.333	0.3333	4	4	0.041593	1.381	4.588	0.414677
Q96IJ6	GMPPA	0.01613	1.333	0	1.333	0.3333	4	4	0.041593	1.381	4.588	0.414677
P98174	FGD1	0.01613	1.333	0	1.333	0.3333	4	4	0.041593	1.381	4.588	0.414677
Q13043	STK4	0.01613	1.333	0	1.333	0.3333	4	4	0.041593	1.381	4.588	0.414677
O60331	PIP5K1C	0.01613	1.333	0	1.333	0.3333	4	4	0.041593	1.381	4.588	0.414677
Q86UY6	NAA40	0.01613	1.333	0	1.333	0.3333	4	4	0.041593	1.381	4.588	0.414677
O15143	ARPC1B	0.01613	1.333	0	1.333	0.3333	4	4	0.041593	1.381	4.588	0.414677
Q9Y5X2	SNX8	0.01613	1.333	0	1.333	0.3333	4	4	0.041593	1.381	4.588	0.414677
Q16543	CDC37	0.01613	6.333	5	1.333	0.3333	4	4	0.041593	1.381	4.588	0.414677
O94979	SEC31A	0.01613	4.333	3	1.333	0.3333	4	4	0.041593	1.381	4.588	0.414677

## Sheet: SC Merlin iso2
Uniprot	Gene	P value	Mean of scMer2A-1	Mean of APEX-1	Difference	SE of difference	t ratio	df	q value	-log10(q value)	-log2(q value)	Weight
P35240	NF2	3e-06	141.7	0	141.7	3.844	36.85	4	0.002816	2.55	8.472	7.1467
Q09666	AHNAK	0.000412	208.3	110.3	98	9.049	10.83	4	0.013048	1.884	6.26	6.61471
P62736	ACTA2	0.000856	136	66.67	69.33	7.732	8.968	4	0.01888	1.724	5.727	6.11541
P68371	TUBB4B	0.001009	70.33	32.67	37.67	4.384	8.591	4	0.01888	1.724	5.727	5.23534
P35222	CTNNB1	0.000251	39.33	8.667	30.67	2.494	12.29	4	0.012249	1.912	6.351	4.93876
Q02952	AKAP12	0.00153	46	22.33	23.67	3.073	7.701	4	0.020505	1.688	5.608	4.56499
P46940	IQGAP1	0.001588	58.33	38	20.33	2.667	7.625	4	0.020505	1.688	5.608	4.34554
Q15417	CNN3	0.002588	32.67	12.33	20.33	3.037	6.696	4	0.022744	1.643	5.458	4.34554
P63261	ACTG1	0.005408	58	38	20	3.651	5.477	4	0.036601	1.437	4.772	4.32193
Q9Y2J4	AMOTL2	<0.000001	19.33	0	19.33	0.3333	58	4	0.000921	3.036	10.09	4.27277
P15311	EZR	3.6e-05	21.67	2.667	19	0.9428	20.15	4	0.007864	2.104	6.99	4.24793
O75369	FLNB	0.002557	83	64	19	2.828	6.718	4	0.0227	1.644	5.461	4.24793
P13010	XRCC5	9.9e-05	22	4	18	1.155	15.59	4	0.010509	1.978	6.572	4.16993
O60716	CTNND1	0.00035	29.67	12	17.67	1.563	11.3	4	0.012681	1.897	6.301	4.14323
Q9BQE3	TUBA1C	0.004357	60.67	43.33	17.33	2.981	5.814	4	0.032394	1.49	4.948	4.1152
P20073	ANXA7	0.001357	23.67	7.333	16.33	2.055	7.949	4	0.019189	1.717	5.704	4.02945
P06733	ENO1	0.002019	19	3	16	2.236	7.155	4	0.020505	1.688	5.608	4
Q6UVK1	CSPG4	0.001244	19.67	4.333	15.33	1.886	8.132	4	0.01888	1.724	5.727	3.93829
Q96RT1	ERBIN	0.005481	19.67	4.667	15	2.749	5.457	4	0.036601	1.437	4.772	3.90689
P26038	MSN	0.003971	17.33	3	14.33	2.404	5.963	4	0.030306	1.518	5.044	3.84097
O43491	EPB41L2	0.000246	19.33	5.667	13.67	1.106	12.36	4	0.012249	1.912	6.351	3.77294
Q7L576	CYFIP1	0.002111	19.67	6.333	13.33	1.886	7.071	4	0.020505	1.688	5.608	3.7366
Q9BUF5	TUBB6	4.5e-05	20	7.333	12.67	0.6667	19	4	0.007864	2.104	6.99	3.66334
P05556	ITGB1	0.00077	18.33	5.667	12.67	1.374	9.216	4	0.017994	1.745	5.796	3.66334
Q14160	SCRIB	0.000587	15.67	3.333	12.33	1.247	9.889	4	0.014182	1.848	6.14	3.6241
Q9P273	TENM3	0.000948	13.33	1.333	12	1.374	8.731	4	0.01888	1.724	5.727	3.58496
Q14240	EIF4A2	0.000211	22.33	11	11.33	0.8819	12.85	4	0.011494	1.94	6.443	3.50208
Q8IY63	AMOTL1	4.5e-05	11	0	11	0.5774	19.05	4	0.007864	2.104	6.99	3.45943
P14618	PKM	0.008885	33	22	11	2.309	4.763	4	0.040151	1.396	4.638	3.45943
P61247	RPS3A	0.000268	15.67	5	10.67	0.8819	12.09	4	0.012249	1.912	6.351	3.41549
Q4VCS5	AMOT	0.000978	10	0	10	1.155	8.66	4	0.01888	1.724	5.727	3.32193
Q96TA1	NIBAN2	0.000451	16	6.667	9.333	0.8819	10.58	4	0.013533	1.869	6.207	3.22234
P26006	ITGA3	0.000584	11.67	2.333	9.333	0.9428	9.899	4	0.014182	1.848	6.14	3.22234
P35221	CTNNA1	0.000898	13	3.667	9.333	1.054	8.854	4	0.01888	1.724	5.727	3.22234
P52272	HNRNPM	0.002192	18	8.667	9.333	1.333	7	4	0.020505	1.688	5.608	3.22234
Q9Y2D5	PALM2AKAP2	0.002811	28.33	19.33	9	1.374	6.548	4	0.024457	1.612	5.354	3.16993
P50995	ANXA11	0.004897	24.67	15.67	9	1.599	5.63	4	0.03506	1.455	4.834	3.16993
Q15233	NONO	0.004897	20.33	11.33	9	1.599	5.63	4	0.03506	1.455	4.834	3.16993
Q14847	LASP1	0.000778	17.33	8.667	8.667	0.9428	9.192	4	0.017994	1.745	5.796	3.11553
P50454	SERPINH1	0.004357	21.33	12.67	8.667	1.491	5.814	4	0.032394	1.49	4.948	3.11553
Q9P0V3	SH3BP4	0.009141	15.33	7	8.333	1.764	4.725	4	0.041201	1.385	4.601	3.05884
Q9NZN4	EHD2	0.001058	12.67	4.667	8	0.9428	8.485	4	0.01888	1.724	5.727	3
Q01995	TAGLN	0.000964	14.67	7	7.667	0.8819	8.693	4	0.01888	1.724	5.727	2.93866
P62081	RPS7	0.000964	7.667	0	7.667	0.8819	8.693	4	0.01888	1.724	5.727	2.93866
Q96BY6	DOCK10	0.001244	8.333	0.6667	7.667	0.9428	8.132	4	0.01888	1.724	5.727	2.93866
P17301	ITGA2	0.006777	9.333	1.667	7.667	1.491	5.143	4	0.036601	1.437	4.772	2.93866
P12236	SLC25A6	2.5e-05	19.33	12	7.333	0.3333	22	4	0.007864	2.104	6.99	2.8744
P29317	EPHA2	0.001143	8	0.6667	7.333	0.8819	8.315	4	0.01888	1.724	5.727	2.8744
P17987	TCP1	0.002243	17	9.667	7.333	1.054	6.957	4	0.020646	1.685	5.598	2.8744
Q9BQG0	MYBBP1A	0.005328	11.33	4	7.333	1.333	5.5	4	0.036601	1.437	4.772	2.8744
P62070	RRAS2	0.00012	9.667	2.667	7	0.4714	14.85	4	0.010509	1.978	6.572	2.80735
P42677	RPS27	0.00012	9.333	2.333	7	0.4714	14.85	4	0.010509	1.978	6.572	2.80735
P55786	NPEPPS	0.001757	9.667	2.667	7	0.9428	7.425	4	0.020505	1.688	5.608	2.80735
Q13509	TUBB3	0.001757	9.333	2.333	7	0.9428	7.425	4	0.020505	1.688	5.608	2.80735
P13929	ENO3	0.002192	7	0	7	1	7	4	0.020505	1.688	5.608	2.80735
Q9Y678	COPG1	0.007016	13.33	6.333	7	1.374	5.093	4	0.036601	1.437	4.772	2.80735
Q15366	PCBP2	0.007016	9.667	2.667	7	1.374	5.093	4	0.036601	1.437	4.772	2.80735
O60488	ACSL4	3.7e-05	6.667	0	6.667	0.3333	20	4	0.007864	2.104	6.99	2.73704
O75970	MPDZ	0.002111	10.33	3.667	6.667	0.9428	7.071	4	0.020505	1.688	5.608	2.73704
Q14195	DPYSL3	0.003198	15	8.333	6.667	1.054	6.325	4	0.025642	1.591	5.285	2.73704
Q02878	RPL6	0.008335	13.33	6.667	6.667	1.374	4.851	4	0.038063	1.42	4.715	2.73704
P15880	RPS2	0.01012	16.67	10	6.667	1.453	4.588	4	0.045378	1.343	4.462	2.73704
P37802	TAGLN2	0.001052	13.67	7.333	6.333	0.7454	8.497	4	0.01888	1.724	5.727	2.66289
P61204	ARF3	0.001293	13.67	7.667	6	0.7454	8.05	4	0.01888	1.724	5.727	2.58496
P06756	ITGAV	0.001293	6.667	0.6667	6	0.7454	8.05	4	0.01888	1.724	5.727	2.58496
Q9NR12	PDLIM7	0.003126	10.33	4.333	6	0.9428	6.364	4	0.025176	1.599	5.312	2.58496
Q04721	NOTCH2	0.003126	10.67	4.667	6	0.9428	6.364	4	0.025176	1.599	5.312	2.58496
P62244	RPS15A	0.006533	11	5	6	1.155	5.196	4	0.036601	1.437	4.772	2.58496
P40227	CCT6A	0.000275	9.333	3.667	5.667	0.4714	12.02	4	0.012249	1.912	6.351	2.50259
P48444	ARCN1	0.005785	8.667	3	5.667	1.054	5.376	4	0.036601	1.437	4.772	2.50259
Q8N4C8	MINK1	0.006859	6.333	0.6667	5.667	1.106	5.126	4	0.036601	1.437	4.772	2.50259
P15170	GSPT1	0.01047	11.33	5.667	5.667	1.247	4.543	4	0.046827	1.33	4.417	2.50259
Q86UU1	PHLDB1	0.001324	9	3.667	5.333	0.6667	8	4	0.01888	1.724	5.727	2.41495
P62913	RPL11	0.001324	8	2.667	5.333	0.6667	8	4	0.01888	1.724	5.727	2.41495
P20042	EIF2S2	0.001324	6	0.6667	5.333	0.6667	8	4	0.01888	1.724	5.727	2.41495
P09619	PDGFRB	0.003772	6	0.6667	5.333	0.8819	6.047	4	0.029039	1.537	5.106	2.41495
P04843	RPN1	0.004813	18.67	13.33	5.333	0.9428	5.657	4	0.035016	1.456	4.836	2.41495
O14786	NRP1	0.007182	8	2.667	5.333	1.054	5.06	4	0.036601	1.437	4.772	2.41495
Q16181	SEPTIN7	0.000447	10.33	5.333	5	0.4714	10.61	4	0.013533	1.869	6.207	2.32193
O75815	BCAR3	0.00257	5.667	0.6667	5	0.7454	6.708	4	0.0227	1.644	5.461	2.32193
O94973	AP2A2	0.00257	5.667	0.6667	5	0.7454	6.708	4	0.0227	1.644	5.461	2.32193
P84098	RPL19	0.00257	6.333	1.333	5	0.7454	6.708	4	0.0227	1.644	5.461	2.32193
P62826	RAN	0.003602	14	9	5	0.8165	6.124	4	0.028105	1.551	5.153	2.32193
P41250	GARS1	0.010637	10.33	5.333	5	1.106	4.523	4	0.04721	1.326	4.405	2.32193
O00161	SNAP23	0.010637	5.667	0.6667	5	1.106	4.523	4	0.04721	1.326	4.405	2.32193
Q8N3R9	PALS1	0.000151	4.667	0	4.667	0.3333	14	4	0.010509	1.978	6.572	2.2225
Q99439	CNN2	0.000151	10.67	6	4.667	0.3333	14	4	0.010509	1.978	6.572	2.2225
P34931	HSPA1L	0.000584	11.33	6.667	4.667	0.4714	9.899	4	0.014182	1.848	6.14	2.2225
Q9UHB9	SRP68	0.000202	4.333	0	4.333	0.3333	13	4	0.011339	1.945	6.463	2.11537
Q9Y6M7	SLC4A7	0.00289	4.333	0	4.333	0.6667	6.5	4	0.024648	1.608	5.342	2.11537
O14908	GIPC1	0.004357	5.667	1.333	4.333	0.7454	5.814	4	0.032394	1.49	4.948	2.11537
Q9Y285	FARSA	0.004357	5.667	1.333	4.333	0.7454	5.814	4	0.032394	1.49	4.948	2.11537
O43166	SIPA1L1	0.007966	5	0.6667	4.333	0.8819	4.914	4	0.036857	1.433	4.762	2.11537
Q8IVF7	FMNL3	0.002278	4	0	4	0.5774	6.928	4	0.020646	1.685	5.598	2
Q13683	ITGA7	0.002278	4	0	4	0.5774	6.928	4	0.020646	1.685	5.598	2
P05023	ATP1A1	0.005821	13.33	9.333	4	0.7454	5.367	4	0.036601	1.437	4.772	2
P50991	CCT4	0.005821	7.667	3.667	4	0.7454	5.367	4	0.036601	1.437	4.772	2
Q15678	PTPN14	0.005821	6.667	2.667	4	0.7454	5.367	4	0.036601	1.437	4.772	2
P38919	EIF4A3	0.005821	4.667	0.6667	4	0.7454	5.367	4	0.036601	1.437	4.772	2
P30530	AXL	0.005821	8.667	4.667	4	0.7454	5.367	4	0.036601	1.437	4.772	2
Q92598	HSPH1	0.00805	11	7	4	0.8165	4.899	4	0.036857	1.433	4.762	2
Q12931	TRAP1	0.00805	8	4	4	0.8165	4.899	4	0.036857	1.433	4.762	2
Q9Y696	CLIC4	0.000388	7.667	4	3.667	0.3333	11	4	0.012681	1.897	6.301	1.8746
P29401	TKT	0.000388	6.667	3	3.667	0.3333	11	4	0.012681	1.897	6.301	1.8746
Q92692	NECTIN2	0.000388	3.667	0	3.667	0.3333	11	4	0.012681	1.897	6.301	1.8746
P15559	NQO1	0.000388	3.667	0	3.667	0.3333	11	4	0.012681	1.897	6.301	1.8746
P55196	AFDN	0.005328	6.667	3	3.667	0.6667	5.5	4	0.036601	1.437	4.772	1.8746
P08648	ITGA5	0.005328	8	4.333	3.667	0.6667	5.5	4	0.036601	1.437	4.772	1.8746
Q8TEW0	PARD3	0.005328	5	1.333	3.667	0.6667	5.5	4	0.036601	1.437	4.772	1.8746
Q13418	ILK	0.007933	8.333	4.667	3.667	0.7454	4.919	4	0.036857	1.433	4.762	1.8746
Q9UN70	PCDHGC3	0.000562	3.333	0	3.333	0.3333	10	4	0.014171	1.849	6.141	1.73682
Q9NPQ8	RIC8A	0.000562	3.333	0	3.333	0.3333	10	4	0.014171	1.849	6.141	1.73682
Q15758	SLC1A5	0.000562	5.333	2	3.333	0.3333	10	4	0.014171	1.849	6.141	1.73682
P30626	SRI	0.002111	5.667	2.333	3.333	0.4714	7.071	4	0.020505	1.688	5.608	1.73682
P49023	PXN	0.00749	6	2.667	3.333	0.6667	5	4	0.036601	1.437	4.772	1.73682
Q8WTT2	NOC3L	0.00749	3.333	0	3.333	0.6667	5	4	0.036601	1.437	4.772	1.73682
Q969T9	WBP2	0.00749	3.333	0	3.333	0.6667	5	4	0.036601	1.437	4.772	1.73682
Q9NQX3	GPHN	0.00749	4	0.6667	3.333	0.6667	5	4	0.036601	1.437	4.772	1.73682
P07355	ANXA2	0.00749	11	7.667	3.333	0.6667	5	4	0.036601	1.437	4.772	1.73682
P62330	ARF6	0.00749	4	0.6667	3.333	0.6667	5	4	0.036601	1.437	4.772	1.73682
Q9BZQ8	NIBAN1	0.011056	9.667	6.333	3.333	0.7454	4.472	4	0.0487	1.312	4.36	1.73682
P51149	RAB7A	0.011056	9.667	6.333	3.333	0.7454	4.472	4	0.0487	1.312	4.36	1.73682
P62191	PSMC1	0.003126	7.667	4.667	3	0.4714	6.364	4	0.025176	1.599	5.312	1.58496
P08754	GNAI3	0.003126	5.333	2.333	3	0.4714	6.364	4	0.025176	1.599	5.312	1.58496
P62820	RAB1A	0.006533	8	5	3	0.5774	5.196	4	0.036601	1.437	4.772	1.58496
Q9ULV4	CORO1C	0.006533	7	4	3	0.5774	5.196	4	0.036601	1.437	4.772	1.58496
Q9H223	EHD4	0.006533	3	0	3	0.5774	5.196	4	0.036601	1.437	4.772	1.58496
Q05397	PTK2	0.006533	3	0	3	0.5774	5.196	4	0.036601	1.437	4.772	1.58496
P10586	PTPRF	0.006533	3	0	3	0.5774	5.196	4	0.036601	1.437	4.772	1.58496
P20936	RASA1	0.001324	6.667	4	2.667	0.3333	8	4	0.01888	1.724	5.727	1.41522
Q96J84	KIRREL1	0.001324	2.667	0	2.667	0.3333	8	4	0.01888	1.724	5.727	1.41522
Q8IZP0	ABI1	0.001324	2.667	0	2.667	0.3333	8	4	0.01888	1.724	5.727	1.41522
P30566	ADSL	0.001324	2.667	0	2.667	0.3333	8	4	0.01888	1.724	5.727	1.41522
Q9Y6W5	WASF2	0.001324	2.667	0	2.667	0.3333	8	4	0.01888	1.724	5.727	1.41522
O00154	ACOT7	0.004813	5.333	2.667	2.667	0.4714	5.657	4	0.035016	1.456	4.836	1.41522
Q969Z0	TBRG4	0.002192	2.333	0	2.333	0.3333	7	4	0.020505	1.688	5.608	1.22219
P30085	CMPK1	0.002192	2.333	0	2.333	0.3333	7	4	0.020505	1.688	5.608	1.22219
P36776	LONP1	0.002192	2.333	0	2.333	0.3333	7	4	0.020505	1.688	5.608	1.22219
O60762	DPM1	0.002192	2.333	0	2.333	0.3333	7	4	0.020505	1.688	5.608	1.22219
P21810	BGN	0.002192	2.333	0	2.333	0.3333	7	4	0.020505	1.688	5.608	1.22219
P56134	ATP5MF	0.002192	2.333	0	2.333	0.3333	7	4	0.020505	1.688	5.608	1.22219
Q9BQ67	GRWD1	0.002192	2.333	0	2.333	0.3333	7	4	0.020505	1.688	5.608	1.22219
Q9H4G0	EPB41L1	0.002192	2.333	0	2.333	0.3333	7	4	0.020505	1.688	5.608	1.22219
Q15058	KIF14	0.002192	2.333	0	2.333	0.3333	7	4	0.020505	1.688	5.608	1.22219
Q14644	RASA3	0.002192	2.333	0	2.333	0.3333	7	4	0.020505	1.688	5.608	1.22219
P05121	SERPINE1	0.002192	2.333	0	2.333	0.3333	7	4	0.020505	1.688	5.608	1.22219
Q13155	AIMP2	0.002192	2.333	0	2.333	0.3333	7	4	0.020505	1.688	5.608	1.22219
P14635	CCNB1	0.002192	2.333	0	2.333	0.3333	7	4	0.020505	1.688	5.608	1.22219
P49207	RPL34	0.002192	2.333	0	2.333	0.3333	7	4	0.020505	1.688	5.608	1.22219
Q14141	SEPTIN6	0.002192	6	3.667	2.333	0.3333	7	4	0.020505	1.688	5.608	1.22219
Q8IXS6	PALM2AKAP2	0.002192	5	2.667	2.333	0.3333	7	4	0.020505	1.688	5.608	1.22219
Q9H9A6	LRRC40	0.002192	4.333	2	2.333	0.3333	7	4	0.020505	1.688	5.608	1.22219
O00151	PDLIM1	0.002192	6.333	4	2.333	0.3333	7	4	0.020505	1.688	5.608	1.22219
Q8N556	AFAP1	0.007763	5.667	3.333	2.333	0.4714	4.95	4	0.036601	1.437	4.772	1.22219
Q9P206	KIAA1522	0.00749	1.667	0	1.667	0.3333	5	4	0.036601	1.437	4.772	0.737254
P18084	ITGB5	0.00749	1.667	0	1.667	0.3333	5	4	0.036601	1.437	4.772	0.737254
Q96CV9	OPTN	0.00749	1.667	0	1.667	0.3333	5	4	0.036601	1.437	4.772	0.737254
O75663	TIPRL	0.00749	1.667	0	1.667	0.3333	5	4	0.036601	1.437	4.772	0.737254
O00232	PSMD12	0.00749	1.667	0	1.667	0.3333	5	4	0.036601	1.437	4.772	0.737254
P62277	RPS13	0.00749	1.667	0	1.667	0.3333	5	4	0.036601	1.437	4.772	0.737254
Q9Y4P1	ATG4B	0.00749	1.667	0	1.667	0.3333	5	4	0.036601	1.437	4.772	0.737254
Q92905	COPS5	0.00749	1.667	0	1.667	0.3333	5	4	0.036601	1.437	4.772	0.737254
Q8NEZ2	VPS37A	0.00749	1.667	0	1.667	0.3333	5	4	0.036601	1.437	4.772	0.737254
Q8TEU7	RAPGEF6	0.00749	1.667	0	1.667	0.3333	5	4	0.036601	1.437	4.772	0.737254
Q99569	PKP4	0.00749	1.667	0	1.667	0.3333	5	4	0.036601	1.437	4.772	0.737254
Q9BV20	MRI1	0.00749	1.667	0	1.667	0.3333	5	4	0.036601	1.437	4.772	0.737254
Q14232	EIF2B1	0.00749	1.667	0	1.667	0.3333	5	4	0.036601	1.437	4.772	0.737254
P50281	MMP14	0.00749	1.667	0	1.667	0.3333	5	4	0.036601	1.437	4.772	0.737254
Q14019	COTL1	0.00749	1.667	0	1.667	0.3333	5	4	0.036601	1.437	4.772	0.737254
P18827	SDC1	0.00749	1.667	0	1.667	0.3333	5	4	0.036601	1.437	4.772	0.737254
Q96D71	REPS1	0.00749	1.667	0	1.667	0.3333	5	4	0.036601	1.437	4.772	0.737254
Q96SB3	PPP1R9B	0.00749	1.667	0	1.667	0.3333	5	4	0.036601	1.437	4.772	0.737254
P11233	RALA	0.00749	1.667	0	1.667	0.3333	5	4	0.036601	1.437	4.772	0.737254
P13861	PRKAR2A	0.00749	1.667	0	1.667	0.3333	5	4	0.036601	1.437	4.772	0.737254
P61019	RAB2A	0.00749	1.667	0	1.667	0.3333	5	4	0.036601	1.437	4.772	0.737254
Q9HAU4	SMURF2	0.00749	1.667	0	1.667	0.3333	5	4	0.036601	1.437	4.772	0.737254
P25325	MPST	0.00749	1.667	0	1.667	0.3333	5	4	0.036601	1.437	4.772	0.737254
P20020	ATP2B1	0.00749	1.667	0	1.667	0.3333	5	4	0.036601	1.437	4.772	0.737254
O75157	TSC22D2	0.00749	1.667	0	1.667	0.3333	5	4	0.036601	1.437	4.772	0.737254
P08581	MET	0.00749	1.667	0	1.667	0.3333	5	4	0.036601	1.437	4.772	0.737254
Q96BM9	ARL8A	0.00749	1.667	0	1.667	0.3333	5	4	0.036601	1.437	4.772	0.737254
Q9UIW2	PLXNA1	0.00749	1.667	0	1.667	0.3333	5	4	0.036601	1.437	4.772	0.737254
Q9P265	DIP2B	0.00749	1.667	0	1.667	0.3333	5	4	0.036601	1.437	4.772	0.737254
P21964	COMT	0.00749	1.667	0	1.667	0.3333	5	4	0.036601	1.437	4.772	0.737254
Q00535	CDK5	0.00749	1.667	0	1.667	0.3333	5	4	0.036601	1.437	4.772	0.737254
Q15738	NSDHL	0.00749	1.667	0	1.667	0.3333	5	4	0.036601	1.437	4.772	0.737254
Q5VT25	CDC42BPA	0.00749	1.667	0	1.667	0.3333	5	4	0.036601	1.437	4.772	0.737254
Q9NX46	ADPRS	0.00749	1.667	0	1.667	0.3333	5	4	0.036601	1.437	4.772	0.737254
Q8N8Z6	DCBLD1	0.00749	1.667	0	1.667	0.3333	5	4	0.036601	1.437	4.772	0.737254
Q02297	NRG1	0.00749	1.667	0	1.667	0.3333	5	4	0.036601	1.437	4.772	0.737254
P29323	EPHB2	0.00749	1.667	0	1.667	0.3333	5	4	0.036601	1.437	4.772	0.737254
O43739	CYTH3	0.00749	1.667	0	1.667	0.3333	5	4	0.036601	1.437	4.772	0.737254
Q9H0U4	RAB1B	0.00749	1.667	0	1.667	0.3333	5	4	0.036601	1.437	4.772	0.737254
Q96P70	IPO9	0.00749	4	2.333	1.667	0.3333	5	4	0.036601	1.437	4.772	0.737254
P43686	PSMC4	0.00749	4	2.333	1.667	0.3333	5	4	0.036601	1.437	4.772	0.737254

## Sheet: Merlin iso2
Uniprot	Gene	P value	Mean of Mer2A-1	Mean of APEX-1	Difference	SE of difference	t ratio	df	q value	-log10(q value)	-log2(q value)	Weight
P35240	NF2	2.9e-05	185.3	0	185.3	8.686	21.34	4	0.013406	1.873	6.221	7.53372
P68371	TUBB4B	0.003578	65	32.67	32.33	5.27	6.135	4	0.043594	1.361	4.52	5.0148
P63261	ACTG1	0.00153	61.67	38	23.67	3.073	7.701	4	0.030447	1.516	5.038	4.56499
O60716	CTNND1	0.000424	34.67	12	22.67	2.108	10.75	4	0.023469	1.63	5.413	4.50271
P06733	ENO1	7.4e-05	25.33	3	22.33	1.333	16.75	4	0.017772	1.75	5.814	4.48091
P50995	ANXA11	0.003588	37	15.67	21.33	3.48	6.13	4	0.043594	1.361	4.52	4.41481
P14618	PKM	0.001109	39.67	22	17.67	2.108	8.38	4	0.028231	1.549	5.147	4.14323
Q4VCS5	AMOT	0.003971	14.33	0	14.33	2.404	5.963	4	0.045489	1.342	4.458	3.84097
Q12929	EPS8	3.3e-05	19.67	6	13.67	0.6667	20.5	4	0.013406	1.873	6.221	3.77294
P05556	ITGB1	0.000424	17	5.667	11.33	1.054	10.75	4	0.023469	1.63	5.413	3.50208
Q9BUF5	TUBB6	0.004544	18.67	7.333	11.33	1.972	5.747	4	0.049771	1.303	4.329	3.50208
P55786	NPEPPS	0.001026	13.33	2.667	10.67	1.247	8.552	4	0.028231	1.549	5.147	3.41549
P07355	ANXA2	0.001896	17.67	7.667	10	1.374	7.276	4	0.030447	1.516	5.038	3.32193
P13010	XRCC5	0.000785	13.67	4	9.667	1.054	9.171	4	0.028231	1.549	5.147	3.27307
Q14240	EIF4A2	0.000451	20.33	11	9.333	0.8819	10.58	4	0.023469	1.63	5.413	3.22234
Q99439	CNN2	0.000601	14.67	6	8.667	0.8819	9.827	4	0.024595	1.609	5.345	3.11553
O14786	NRP1	0.000778	11.33	2.667	8.667	0.9428	9.192	4	0.028231	1.549	5.147	3.11553
P61204	ARF3	0.000778	16.33	7.667	8.667	0.9428	9.192	4	0.028231	1.549	5.147	3.11553
Q96TA1	NIBAN2	0.001244	14.33	6.667	7.667	0.9428	8.132	4	0.028231	1.549	5.147	2.93866
Q9P0V3	SH3BP4	0.004535	14.67	7	7.667	1.333	5.75	4	0.049771	1.303	4.329	2.93866
Q14195	DPYSL3	0.004181	15.67	8.333	7.333	1.247	5.88	4	0.047618	1.322	4.392	2.8744
P62081	RPS7	0.002192	7	0	7	1	7	4	0.030447	1.516	5.038	2.80735
O60488	ACSL4	0.000562	6.667	0	6.667	0.6667	10	4	0.023469	1.63	5.413	2.73704
P04844	RPN2	0.000562	14.67	8	6.667	0.6667	10	4	0.023469	1.63	5.413	2.73704
Q12931	TRAP1	0.001641	10.67	4	6.667	0.8819	7.559	4	0.030447	1.516	5.038	2.73704
P05023	ATP1A1	0.001052	15.67	9.333	6.333	0.7454	8.497	4	0.028231	1.549	5.147	2.66289
Q15366	PCBP2	0.003126	8.667	2.667	6	0.9428	6.364	4	0.039157	1.407	4.675	2.58496
Q15365	PCBP1	0.001051	17	11.33	5.667	0.6667	8.5	4	0.028231	1.549	5.147	2.50259
P11234	RALB	8.9e-05	5.333	0	5.333	0.3333	16	4	0.017772	1.75	5.814	2.41495
P40227	CCT6A	0.001324	9	3.667	5.333	0.6667	8	4	0.028231	1.549	5.147	2.41495
O95721	SNAP29	0.001324	5.333	0	5.333	0.6667	8	4	0.028231	1.549	5.147	2.41495
P13929	ENO3	0.003772	5.333	0	5.333	0.8819	6.047	4	0.044284	1.354	4.497	2.41495
P20042	EIF2S2	0.00257	5.667	0.6667	5	0.7454	6.708	4	0.033673	1.473	4.892	2.32193
P08243	ASNS	0.000151	4.667	0	4.667	0.3333	14	4	0.017772	1.75	5.814	2.2225
P63104	YWHAZ	0.00332	11.33	6.667	4.667	0.7454	6.261	4	0.040989	1.387	4.609	2.2225
P31946	YWHAB	0.00332	7.333	2.667	4.667	0.7454	6.261	4	0.040989	1.387	4.609	2.2225
P50148	GNAQ	0.00289	5	0.6667	4.333	0.6667	6.5	4	0.037134	1.43	4.751	2.11537
P04899	GNAI2	0.001058	6.333	2.333	4	0.4714	8.485	4	0.028231	1.549	5.147	2
P48444	ARCN1	0.002278	7	3	4	0.5774	6.928	4	0.030447	1.516	5.038	2
Q9Y6M7	SLC4A7	0.002278	4	0	4	0.5774	6.928	4	0.030447	1.516	5.038	2
P15559	NQO1	0.000562	3.333	0	3.333	0.3333	10	4	0.023469	1.63	5.413	1.73682
Q99704	DOK1	0.000562	3.333	0	3.333	0.3333	10	4	0.023469	1.63	5.413	1.73682
Q13509	TUBB3	0.002111	5.667	2.333	3.333	0.4714	7.071	4	0.030447	1.516	5.038	1.73682
Q14118	DAG1	0.001324	2.667	0	2.667	0.3333	8	4	0.028231	1.549	5.147	1.41522
O94874	UFL1	0.001324	2.667	0	2.667	0.3333	8	4	0.028231	1.549	5.147	1.41522
Q9Y3E5	PTRH2	0.001324	2.667	0	2.667	0.3333	8	4	0.028231	1.549	5.147	1.41522
P11166	SLC2A1	0.001324	2.667	0	2.667	0.3333	8	4	0.028231	1.549	5.147	1.41522
P18827	SDC1	0.001324	2.667	0	2.667	0.3333	8	4	0.028231	1.549	5.147	1.41522
P60953	CDC42	0.001324	2.667	0	2.667	0.3333	8	4	0.028231	1.549	5.147	1.41522
P11233	RALA	0.001324	2.667	0	2.667	0.3333	8	4	0.028231	1.549	5.147	1.41522
P61225	RAP2B	0.001324	2.667	0	2.667	0.3333	8	4	0.028231	1.549	5.147	1.41522
Q15287	RNPS1	0.001324	2.667	0	2.667	0.3333	8	4	0.028231	1.549	5.147	1.41522
O43813	LANCL1	0.001324	2.667	0	2.667	0.3333	8	4	0.028231	1.549	5.147	1.41522
P13674	P4HA1	0.001324	2.667	0	2.667	0.3333	8	4	0.028231	1.549	5.147	1.41522
Q9UHB9	SRP68	0.002192	2.333	0	2.333	0.3333	7	4	0.030447	1.516	5.038	1.22219
Q8WTT2	NOC3L	0.002192	2.333	0	2.333	0.3333	7	4	0.030447	1.516	5.038	1.22219
Q05397	PTK2	0.002192	2.333	0	2.333	0.3333	7	4	0.030447	1.516	5.038	1.22219
O60762	DPM1	0.002192	2.333	0	2.333	0.3333	7	4	0.030447	1.516	5.038	1.22219
P56134	ATP5MF	0.002192	2.333	0	2.333	0.3333	7	4	0.030447	1.516	5.038	1.22219
Q13126	MTAP	0.002192	2.333	0	2.333	0.3333	7	4	0.030447	1.516	5.038	1.22219
O95299	NDUFA10	0.002192	2.333	0	2.333	0.3333	7	4	0.030447	1.516	5.038	1.22219
Q9Y4P1	ATG4B	0.002192	2.333	0	2.333	0.3333	7	4	0.030447	1.516	5.038	1.22219
Q9NQ39	RPS10P5	0.002192	2.333	0	2.333	0.3333	7	4	0.030447	1.516	5.038	1.22219
Q92928	RAB1C	0.002192	2.333	0	2.333	0.3333	7	4	0.030447	1.516	5.038	1.22219
P11177	PDHB	0.002192	2.333	0	2.333	0.3333	7	4	0.030447	1.516	5.038	1.22219
Q96SB3	PPP1R9B	0.002192	2.333	0	2.333	0.3333	7	4	0.030447	1.516	5.038	1.22219
O76021	RSL1D1	0.002192	2.333	0	2.333	0.3333	7	4	0.030447	1.516	5.038	1.22219
Q9NVZ3	NECAP2	0.002192	2.333	0	2.333	0.3333	7	4	0.030447	1.516	5.038	1.22219
P62834	RAP1A	0.002192	2.333	0	2.333	0.3333	7	4	0.030447	1.516	5.038	1.22219
O14737	PDCD5	0.002192	2.333	0	2.333	0.3333	7	4	0.030447	1.516	5.038	1.22219
Q9BUP0	EFHD1	0.002192	2.333	0	2.333	0.3333	7	4	0.030447	1.516	5.038	1.22219
P51571	SSR4	0.002192	4.333	2	2.333	0.3333	7	4	0.030447	1.516	5.038	1.22219

## Sheet: Normalized Data
			Control			APEX-2			scMerA			MerA-2			scMer2A			Mer2A
Uniprot	Gene	Ctrl-1	Ctrl-2	Ctrl-3	APEX-1	APEX-2	APEX-3	scMerA-1	scMerA-2	scMerA-3	MerA-1	MerA-2	MerA-3	scMer2A-1	scMer2A-2	scMer2A-3	Mer2A-1	Mer2A-2	Mer2A-3
Q09666	AHNAK	45.2489	40.6699	66.5281	97.6903	118.317	115.214	183.789	147.854	164.894	143.748	121.629	154.375	204.573	221.38	198.725	105.537	109.081	119.105
P21333	FLNA	77.9286	86.1244	97.7131	253.692	266.433	259.233	123.311	100.974	108.502	113.775	101.651	125.605	273.767	279.477	257.537	154.246	154.531	187.51
Q14204	DYNC1H1	113.122	105.263	97.7131	65.1268	60.4733	57.6072	64.4046	57.6992	55.6785	65.4514	52.8821	66.662	68.5921	78.8894	68.0988	50.3328	59.0855	46.6763
Q15149	PLEC	138.26	157.895	133.056	80.2726	105.171	110.071	62.0484	59.863	53.537	63.6163	52.2945	65.2586	71.6005	81.9472	73.0514	68.1929	81.8107	72.4288
P35579	MYH9	213.675	153.11	424.116	168.118	189.308	190.31	119.384	98.81	114.212	17.7392	21.7404	21.0512	104.693	61.1546	60.6698	22.731	35.4513	38.6287
P78527	PRKDC	100.553	93.3014	76.9231	74.2143	76.2489	69.9517	51.0525	36.062	41.402	41.5953	45.8311	44.2074	70.3971	77.6663	66.2416	51.9565	69.0846	42.6525
O75369	FLNB	7.54148	7.17703	14.553	62.0977	64.8554	64.8081	91.8944	77.894	74.238	61.7813	60.5206	76.4859	84.2359	78.2779	86.6712	66.5692	46.3594	79.6717
Q00610	CLTC	0	7.17703	10.395	94.6611	96.4067	85.3822	60.4775	58.4205	52.8232	67.2865	56.4075	57.5398	85.4392	97.8474	82.9567	47.0856	51.8135	65.1859
P49327	FASN	7.54148	0	14.553	50.7384	44.6976	39.0906	52.6233	59.1417	51.3955	46.4889	40.5429	46.3125	56.5584	58.0969	50.7646	34.0964	34.5423	53.9192
P46821	MAP1B	7.54148	9.56938	18.711	89.3601	101.665	100.813	49.4816	46.8806	48.5402	45.8772	44.656	52.6279	64.3803	77.0548	61.908	38.1555	39.9964	65.1859
P46940	IQGAP1	32.6797	38.2775	39.501	34.8353	39.4391	40.1193	60.4775	59.1417	54.9647	44.6538	43.4808	50.5228	60.1685	61.1546	53.86	48.7092	45.4504	73.2335
Q14315	FLNC	32.6797	45.4545	49.896	67.3987	73.6196	85.3822	77.7568	65.6329	69.955	62.393	55.82	62.4518	78.219	77.6663	81.0995	51.1447	45.4504	58.7478
P35240	NF2	0	0	10.395	0	0	0	120.17	134.872	119.209	54.4409	51.1193	50.5228	139.591	149.217	136.198	193.213	168.167	194.753
Q9NZM1	MYOF	12.5691	9.56938	20.79	39.379	35.057	34.9758	53.4087	46.8806	43.5434	39.7602	34.6671	43.5057	39.7112	33.635	43.9547	40.591	39.0874	52.3097
Q13085	ACACA	1191.55	1071.77	939.709	76.4862	85.0131	89.497	90.3236	75.7303	69.955	47.1006	43.4808	52.6279	38.5078	39.1389	30.954	54.3919	52.7225	50.7001
Q9Y490	TLN1	0	0	0	45.4373	44.6976	34.9758	44.7691	46.1594	47.8264	44.6538	41.7181	42.1023	50.5415	43.4198	43.3356	32.4728	32.7243	47.4811
Q13813	SPTAN1	0	0	0	43.1655	41.1919	39.0906	42.4128	35.3408	37.119	34.255	27.6162	36.4887	33.0927	43.4198	35.2876	12.9891	2.72702	26.5572
Q02952	AKAP12	0	0	0	22.7187	18.4049	25.7175	17.2793	12.2611	18.5595	11.0105	11.7516	12.6307	47.5331	48.3121	42.0974	9.74184	6.36306	21.7286
Q01082	SPTBN1	0	0	0	25.7478	35.9334	30.861	33.7732	25.9647	29.2669	23.8561	25.2659	32.2784	29.4826	34.2466	30.3349	12.1773	3.63603	24.9477
P46013	MKI67	0	0	0	57.554	56.0911	57.6072	29.0606	11.5398	29.2669	14.6807	9.98884	18.2443	28.2792	37.9159	34.0494	3.24728	6.36306	10.4619
O43707	ACTN4	0	11.9617	37.422	71.9424	70.1139	67.8942	55.765	64.9116	68.5274	52.6058	52.8821	61.0483	64.3803	75.8317	58.8126	101.478	77.2657	82.8907
P18206	VCL	0	0	4.158	27.2624	28.0456	40.1193	36.1294	43.2744	33.5499	40.9836	39.9553	43.5057	40.9146	38.5274	43.3356	50.3328	46.3594	37.0192
Q9UPN3	MACF1	0	0	0	31.0488	38.5627	32.9184	33.7732	19.4735	24.2701	22.6327	18.8025	21.7529	21.059	31.1888	22.2869	4.0591	4.54504	13.681
P11498	PC	565.611	595.694	459.459	71.1852	72.7432	63.7794	63.6192	48.3231	50.6817	47.1006	39.9553	44.2074	37.9061	41.5851	36.5257	62.5101	35.4513	59.5526
Q9C0C2	TNKS1BP1	0	0	0	31.0488	30.6748	30.861	21.9918	23.0797	22.8425	24.4678	27.6162	27.3665	30.0842	28.7427	27.8586	21.1073	16.3621	30.581
O95425	SVIL	0	0	0	18.9322	21.0342	17.4879	23.5627	16.5885	24.2701	26.3029	23.5031	21.7529	26.4741	21.4041	23.525	27.6019	21.8162	50.7001
P27816	MAP4	5.02765	4.78469	14.553	28.777	27.1691	38.0619	21.9918	28.1284	29.9807	26.3029	26.441	30.875	33.0927	39.7505	36.5257	23.5428	18.1802	43.4573
P27708	CAD	15.083	14.3541	24.948	22.7187	22.787	24.6888	26.7044	18.031	24.2701	14.6807	15.277	19.6477	22.864	26.2965	20.4296	12.1773	19.0892	18.5096
Q86V48	LUZP1	0	0	0	23.476	20.1578	24.6888	22.7773	22.3585	25.6978	15.9041	16.4522	19.6477	25.8724	28.7427	27.8586	11.3655	7.27207	28.9715
P13639	EEF2	10.0553	7.17703	16.632	41.6509	45.5741	46.2915	43.9837	38.2257	33.5499	30.5848	32.3168	37.1904	40.3129	45.2544	39.6211	37.3437	35.4513	39.4334
Q96RQ3	MCCC1	449.975	442.584	374.22	56.7967	63.1025	58.6359	49.4816	36.062	39.9743	27.5263	27.0286	31.5767	28.8809	26.2965	26.0014	42.2146	29.0883	39.4334
O60716	CTNND1	0	0	0	13.6312	11.3935	11.3157	29.0606	32.4558	28.5531	24.4678	29.3789	21.7529	28.8809	28.1311	32.1922	37.3437	36.3603	31.3858
P12814	ACTN1	0	0	10.395	37.1072	30.6748	67.8942	62.8338	85.1064	64.9582	47.1006	46.4187	52.6279	27.0758	29.3542	31.5731	45.4619	29.9973	40.2382
Q8WWI1	LMO7	0	0	0	20.4468	24.5399	29.8323	37.7003	39.6682	48.5402	31.1965	38.7802	30.1733	21.6606	23.8503	21.6678	27.6019	20.9072	30.581
P06576	ATP5F1B	45.2489	45.4545	41.58	10.602	10.5171	7.20091	7.85423	5.76992	6.42444	6.72865	8.2261	8.42046	19.2539	14.6771	14.8579	20.2955	26.3612	19.3143
Q96RT1	ERBIN	0	0	0	6.05831	4.38212	4.1148	29.8461	22.3585	29.9807	18.3509	18.2149	23.858	17.4489	17.1233	24.7632	12.1773	10.9081	17.7048
P08670	VIM	170.94	141.148	166.32	79.5153	82.3839	83.3248	64.4046	49.0444	59.9615	28.7497	27.0286	30.875	53.5499	67.2701	60.6698	60.8865	83.6288	77.2574
P02545	LMNA	32.6797	33.4928	27.027	45.4373	54.3383	54.5211	18.0647	18.7523	21.4148	17.7392	19.9777	18.2443	30.0842	25.6849	27.8586	38.1555	39.9964	37.0192
Q9Y2D5	PALM2AKAP2	0	0	4.158	18.1749	20.1578	19.5453	29.0606	28.8496	31.4084	25.6912	22.9156	19.6477	28.8809	25.6849	29.7158	30.8492	23.6342	36.2144
Q00341	HDLBP	17.5968	21.5311	12.474	22.7187	16.6521	19.5453	18.8501	12.2611	13.5627	23.8561	17.0398	19.6477	24.6691	15.9002	22.2869	20.2955	15.4531	18.5096
P53396	ACLY	0	0	4.158	22.7187	23.6635	21.6027	21.2064	18.7523	27.8392	19.5743	17.0398	22.4546	21.059	20.181	24.1441	7.30638	8.18107	20.9239
Q7Z6Z7	HUWE1	10.0553	7.17703	8.31601	26.5051	28.922	20.574	14.923	11.5398	9.27975	17.7392	14.1019	23.1563	17.4489	18.3464	17.3342	4.87092	7.27207	8.04764
Q03001	DST	0	0	0	43.9228	57.844	41.148	18.0647	10.0974	22.8425	12.8456	5.87579	9.12217	15.6438	26.908	16.7152	1.62364	0	4.82859
P68371	TUBB4B	110.608	117.225	103.95	31.0488	30.6748	36.0045	37.7003	39.6682	39.2605	34.255	33.492	32.9801	77.0156	62.9892	70.5751	60.0747	74.5387	60.3573
P35222	CTNNB1	0	0	0	6.8156	9.64067	9.25831	25.1335	28.1284	34.2637	29.3614	26.441	28.7699	37.3045	36.6928	43.9547	37.3437	16.3621	43.4573
P25705	ATP5F1A	93.0116	76.555	76.9231	20.4468	23.6635	24.6888	16.4939	18.031	14.9904	19.5743	17.6274	18.2443	27.0758	25.6849	25.3823	30.0373	37.2693	34.6049
Q07157	TJP1	0	0	0	15.1458	14.0228	14.4018	14.923	18.031	19.2733	17.1275	18.8025	13.3324	17.4489	15.2886	18.5724	13.8009	5.45405	21.7286
P49792	RANBP2	0	0	4.158	22.7187	26.2927	22.6314	17.2793	9.37613	14.9904	9.78713	5.28821	7.01705	15.0421	20.7926	17.3342	3.24728	5.45405	8.85241
P14618	PKM	98.0392	95.6938	76.9231	19.6895	24.5399	20.574	25.9189	28.8496	27.1254	27.5263	26.441	30.875	30.0842	36.0812	32.8112	37.3437	41.8144	40.2382
Q6WCQ1	MPRIP	0	0	0	17.4176	22.787	25.7175	19.6356	15.8673	22.1286	11.0105	14.6895	18.946	21.059	23.8503	23.525	7.30638	5.45405	12.8762
Q96N67	DOCK7	0	0	0	18.9322	18.4049	22.6314	18.8501	14.4248	14.2765	12.8456	13.5143	24.5597	17.4489	20.181	16.0961	8.93002	4.54504	20.9239
Q14008	CKAP5	0	0	0	15.9031	16.6521	21.6027	21.9918	14.4248	19.9872	21.4093	19.3901	21.0512	16.2455	18.9579	19.1915	12.1773	9.99909	13.681
Q92538	GBF1	10.0553	7.17703	10.395	18.1749	21.9106	25.7175	21.9918	15.8673	19.9872	15.9041	17.0398	21.7529	16.2455	14.0656	14.8579	8.93002	11.8171	6.43811
Q14160	SCRIB	0	0	0	5.30102	2.62927	2.0574	18.8501	16.5885	19.9872	13.4573	14.6895	19.6477	16.2455	14.0656	16.7152	14.6128	8.18107	13.681
P11021	HSPA5	32.6797	26.3158	22.869	23.476	25.4163	30.861	25.9189	28.8496	29.2669	23.2444	25.2659	25.9631	27.6775	28.1311	27.8586	28.4137	24.5432	32.9953
Q9UDY2	TJP2	0	0	0	18.1749	14.8992	17.4879	29.8461	31.7346	35.6913	22.6327	23.5031	23.1563	20.4573	22.0157	25.3823	13.8009	4.54504	23.3382
Q9P0K7	RAI14	0	0	0	13.6312	19.2813	21.6027	22.7773	20.1947	24.2701	17.1275	14.1019	11.2273	18.0505	17.7348	19.1915	7.30638	5.45405	10.4619
Q6UVK1	CSPG4	0	0	0	5.30102	6.13497	2.0574	20.421	25.2434	21.4148	17.7392	15.8646	19.6477	16.8472	19.5695	22.2869	18.6719	7.27207	16.9
P11142	HSPA8	22.6244	21.5311	20.79	43.1655	26.2927	33.9471	23.5627	22.3585	24.2701	23.2444	25.8535	26.6648	36.1011	42.1967	43.9547	27.6019	26.3612	31.3858
P52272	HNRNPM	10.0553	16.7464	14.553	10.602	7.88782	7.20091	7.0688	2.88496	5.71061	6.72865	6.46336	9.12217	18.6522	16.5117	17.9533	24.3546	39.9964	18.5096
P55072	VCP	0	0	0	30.2916	30.6748	41.148	22.7773	27.4071	22.1286	29.9731	30.5541	28.0682	18.0505	16.5117	19.8106	25.9782	18.1802	20.9239
Q52LW3	ARHGAP29	0	0	0	15.9031	14.8992	13.3731	16.4939	15.1461	15.7042	12.8456	11.7516	13.3324	15.6438	14.0656	19.1915	6.49456	3.63603	12.0715
P78559	MAP1A	0	0	8.31601	31.0488	38.5627	38.0619	12.5668	15.8673	16.418	19.5743	15.277	11.929	13.8387	22.0157	13.6198	5.68274	6.36306	12.0715
P68104	EEF1A1	75.4148	74.1627	70.6861	31.0488	28.922	36.0045	36.1294	31.7346	31.4084	41.5953	47.5939	37.1904	60.1685	44.0313	40.2402	39.7792	55.4495	29.7763
Q15417	CNN3	0	0	6.23701	14.3885	11.3935	12.3444	25.1335	20.916	25.6978	22.021	25.2659	24.5597	32.491	28.1311	38.383	51.1447	45.4504	30.581
Q8WUM4	PDCD6IP	27.6521	21.5311	20.79	15.1458	20.1578	17.4879	18.0647	21.6372	22.1286	21.4093	19.9777	18.946	16.2455	20.7926	24.1441	25.1664	28.1793	20.1191
P53618	COPB1	22.6244	28.7081	27.027	11.3593	12.2699	9.25831	19.6356	15.1461	12.8489	12.8456	15.277	14.0341	15.6438	14.6771	14.2388	12.1773	16.3621	9.65717
P07814	EPRS1	27.6521	35.8852	35.343	27.2624	30.6748	27.7749	14.1376	8.65489	9.27975	10.3988	7.63852	11.2273	15.6438	17.1233	14.2388	11.3655	12.7261	12.8762
Q92616	GCN1	7.54148	9.56938	8.31601	12.8739	10.5171	11.3157	17.2793	14.4248	13.5627	17.7392	16.4522	21.7529	12.6354	11.6194	12.3816	6.49456	6.36306	8.04764
Q9BQE3	TUBA1C	90.4977	78.9474	79.0021	38.6217	42.9448	48.3489	44.7691	39.6682	37.119	39.1485	38.7802	37.8921	63.1769	58.0969	60.6698	60.0747	63.6306	44.262
P50995	ANXA11	0	0	12.474	12.8739	16.6521	17.4879	21.2064	20.916	19.2733	15.2924	16.4522	14.7358	25.2708	25.6849	22.906	35.7201	42.7234	32.1906
P50454	SERPINH1	50.2765	45.4545	45.738	12.1166	12.2699	14.4018	12.5668	14.4248	16.418	18.3509	21.7404	16.8409	24.0674	19.5695	19.8106	19.4837	21.8162	24.1429
Q7L576	CYFIP1	5.02765	7.17703	8.31601	6.05831	7.01139	6.1722	10.9959	12.2611	12.8489	15.9041	16.4522	11.929	21.6606	15.9002	21.0487	10.5537	8.18107	12.8762
O43491	EPB41L2	0	0	0	4.54373	5.25855	7.20091	16.4939	19.4735	21.4148	17.7392	17.0398	18.2443	21.059	18.3464	18.5724	16.2364	8.18107	19.3143
P04843	RPN1	17.5968	16.7464	16.632	13.6312	12.2699	14.4018	8.63965	7.21241	9.27975	9.78713	12.9267	13.3324	19.8556	17.7348	17.9533	17.86	19.0892	16.0953
P15311	EZR	0	0	0	3.02916	2.62927	2.0574	18.0647	18.7523	16.418	18.9626	18.8025	19.6477	19.8556	22.6272	21.6678	31.661	15.4531	19.3143
P53621	COPA	20.1106	14.3541	12.474	14.3885	18.4049	13.3731	16.4939	13.7036	12.8489	12.8456	13.5143	18.2443	15.0421	15.9002	15.477	14.6128	11.8171	12.0715
Q9Y678	COPG1	30.1659	33.4928	24.948	8.33018	3.5057	7.20091	14.1376	11.5398	13.5627	14.069	13.5143	11.929	14.4404	12.2309	13.6198	9.74184	8.18107	9.65717
Q9NR30	DDX21	0	7.17703	4.158	9.08747	7.01139	9.25831	6.28338	4.32744	4.99679	6.11696	5.87579	7.01705	14.4404	11.0078	11.7625	9.74184	18.1802	9.65717
Q04637	EIF4G1	0	0	0	16.6604	21.9106	16.4592	14.1376	16.5885	14.9904	17.1275	14.6895	16.1392	13.8387	13.454	14.8579	10.5537	8.18107	11.2667
O75962	TRIO	0	0	0	12.1166	12.2699	9.25831	13.3522	3.6062	6.42444	10.3988	6.46336	11.2273	12.6354	17.1233	13.0007	3.24728	3.63603	5.63335
P08133	ANXA6	0	0	0	12.8739	16.6521	17.4879	17.2793	18.031	15.7042	18.9626	21.1528	21.7529	12.0337	15.9002	13.0007	34.0964	32.7243	20.1191
A5YKK6	CNOT1	0	0	0	12.8739	13.1464	11.3157	10.9959	7.21241	9.99358	14.6807	14.1019	16.1392	11.432	11.0078	11.1434	2.43546	1.81802	8.85241
P05165	PCCA	316.742	279.904	253.638	47.7092	43.8212	44.2341	31.4169	28.1284	27.8392	23.2444	23.5031	19.6477	21.059	18.3464	17.3342	22.731	19.0892	23.3382
Q14247	CTTN	7.54148	7.17703	4.158	20.4468	18.4049	15.4305	14.923	19.4735	17.1318	17.1275	15.8646	18.946	21.059	20.181	17.9533	27.6019	32.7243	28.1667
P17987	TCP1	27.6521	26.3158	24.948	8.33018	10.5171	10.287	10.9959	10.0974	12.8489	9.78713	7.63852	9.82387	18.0505	15.9002	16.7152	12.9891	13.6351	18.5096
P33993	MCM7	22.6244	21.5311	18.711	11.3593	11.3935	9.25831	12.5668	12.2611	12.1351	9.78713	11.164	14.0341	16.2455	11.6194	12.3816	12.1773	19.0892	8.04764
O00159	MYO1C	45.2489	33.4928	33.264	15.1458	10.5171	13.3731	17.2793	13.7036	14.2765	9.17543	8.81368	9.82387	15.6438	12.8425	13.6198	9.74184	12.7261	12.8762
Q86W92	PPFIBP1	0	0	0	7.57289	8.76424	7.20091	14.923	10.8186	9.99358	11.0105	8.2261	13.3324	13.8387	11.0078	10.5244	4.87092	1.81802	8.04764
Q14203	DCTN1	20.1106	16.7464	10.395	12.1166	8.76424	10.287	6.28338	8.65489	4.99679	8.56374	10.5764	11.2273	13.2371	12.2309	13.0007	12.1773	9.99909	6.43811
O00410	IPO5	0	0	4.158	8.33018	7.88782	7.20091	15.7085	11.5398	14.9904	8.56374	8.2261	11.2273	12.6354	9.17319	12.3816	8.1182	7.27207	10.4619
Q9NZN4	EHD2	17.5968	21.5311	20.79	5.30102	5.25855	4.1148	12.5668	15.1461	11.4212	12.8456	15.8646	14.7358	12.6354	11.0078	13.6198	10.5537	14.5441	8.85241
Q15746	MYLK	0	0	0	9.84476	7.88782	8.22961	14.1376	22.3585	17.1318	16.5158	18.8025	19.6477	12.6354	14.6771	17.9533	12.1773	8.18107	19.3143
Q9NQW6	ANLN	0	0	0	13.6312	12.2699	13.3731	14.923	10.0974	17.1318	6.11696	7.05094	9.82387	12.0337	17.7348	19.8106	2.43546	0	8.04764
Q14152	EIF3A	0	0	0	21.9614	19.2813	22.6314	18.0647	11.5398	12.1351	13.4573	12.9267	16.1392	11.432	13.454	14.8579	2.43546	8.18107	12.0715
Q6XZF7	DNMBP	0	0	0	11.3593	13.1464	12.3444	14.923	15.8673	15.7042	13.4573	12.9267	16.8409	10.8303	11.0078	10.5244	8.93002	6.36306	9.65717
P23396	RPS3	60.3318	55.0239	60.2911	22.7187	19.2813	25.7175	22.7773	20.1947	19.2733	17.1275	15.8646	21.7529	29.4826	29.3542	26.0014	22.731	27.2702	27.362
Q9UHB6	LIMA1	0	0	0	9.84476	11.3935	18.5166	20.421	33.8983	19.9872	16.5158	17.6274	19.6477	22.2623	22.0157	22.2869	22.731	20.9072	42.6525
P13010	XRCC5	27.6521	95.6938	66.5281	4.54373	4.38212	3.0861	27.4898	20.916	19.9872	11.0105	7.63852	23.1563	21.059	24.4618	21.0487	12.1773	15.4531	14.4858
Q15233	NONO	7.54148	4.78469	10.395	12.1166	12.2699	10.287	7.85423	6.49116	11.4212	9.17543	7.63852	11.2273	19.8556	17.7348	22.906	14.6128	17.2712	12.8762
Q86VP6	CAND1	17.5968	11.9617	14.553	9.84476	8.76424	9.25831	12.5668	11.5398	11.4212	13.4573	12.3392	11.2273	15.6438	12.2309	12.3816	12.1773	10.9081	12.8762
P55060	CSE1L	10.0553	9.56938	8.31601	6.8156	6.13497	11.3157	9.42507	7.21241	7.8521	9.78713	9.40126	10.5256	15.0421	12.2309	13.6198	9.74184	9.99909	9.65717
P00533	EGFR	0	0	0	5.30102	6.13497	7.20091	11.7813	12.9823	14.2765	7.95204	8.81368	8.42046	15.0421	10.3963	13.6198	16.2364	16.3621	11.2667
P54886	ALDH18A1	45.2489	35.8852	37.422	8.33018	11.3935	14.4018	15.7085	16.5885	14.9904	11.6222	12.9267	13.3324	14.4404	13.454	16.7152	15.4246	16.3621	10.4619
Q9Y4L1	HYOU1	10.0553	7.17703	6.23701	2.27187	1.75285	0	2.35627	3.6062	1.42765	9.78713	8.81368	4.21023	13.2371	6.11546	7.42896	7.30638	8.18107	4.82859
O14980	XPO1	20.1106	23.9234	20.79	8.33018	8.76424	4.1148	14.1376	14.4248	12.1351	11.0105	13.5143	11.2273	13.2371	11.0078	11.1434	10.5537	11.8171	8.85241
P12956	XRCC6	10.0553	19.1388	16.632	10.602	11.3935	8.22961	3.92711	6.49116	4.28296	7.95204	9.40126	9.12217	13.2371	11.0078	10.5244	16.2364	19.9982	13.681
P35221	CTNNA1	0	0	0	5.30102	1.75285	4.1148	18.8501	19.4735	22.1286	18.3509	21.1528	18.946	12.6354	11.6194	13.6198	11.3655	4.54504	16.9
P42224	STAT1	35.1936	33.4928	24.948	14.3885	14.0228	17.4879	11.7813	16.5885	16.418	16.5158	17.0398	16.8409	12.6354	12.8425	11.7625	6.49456	7.27207	10.4619
P55786	NPEPPS	7.54148	9.56938	12.474	3.02916	1.75285	3.0861	5.49796	6.49116	5.71061	8.56374	10.5764	9.12217	11.432	7.9501	9.90528	10.5537	14.5441	14.4858
Q9ULT8	HECTD1	0	0	0	12.8739	12.2699	13.3731	13.3522	16.5885	12.1351	12.2339	15.277	14.7358	10.8303	10.3963	12.3816	2.43546	2.72702	9.65717
Q9Y2A7	NCKAP1	0	0	0	5.30102	6.13497	5.1435	9.42507	12.2611	11.4212	7.95204	14.1019	10.5256	10.8303	9.78474	7.42896	8.1182	9.99909	14.4858
P62736	ACTA2	93.0116	105.263	114.345	73.457	56.0911	70.9804	82.4694	90.1551	89.2284	88.0842	89.8995	75.7842	129.362	146.771	131.864	216.756	258.158	130.372
Q14240	EIF4A2	37.7074	35.8852	33.264	10.602	11.3935	11.3157	19.6356	18.7523	17.1318	14.069	12.9267	15.4375	24.0674	20.7926	21.6678	20.2955	21.8162	19.3143
Q6NZI2	CAVIN1	12.5691	7.17703	18.711	15.1458	14.8992	20.574	12.5668	15.8673	13.5627	14.069	14.1019	14.7358	23.4657	17.7348	19.1915	19.4837	19.9982	27.362
P39023	RPL3	37.7074	40.6699	29.106	16.6604	18.4049	20.574	15.7085	18.031	16.418	12.2339	9.98884	10.5256	22.2623	19.5695	19.1915	14.6128	24.5432	12.0715
P60842	EIF4A1	32.6797	35.8852	27.027	15.1458	13.1464	18.5166	12.5668	17.3098	15.7042	14.6807	11.7516	11.2273	19.2539	15.2886	12.3816	17.86	23.6342	14.4858
Q9Y2J4	AMOTL2	0	0	0	0	0	0	43.1982	38.2257	28.5531	12.8456	14.1019	13.3324	18.6522	18.9579	20.4296	18.6719	15.4531	28.1667
Q96TA1	NIBAN2	0	0	4.158	4.54373	7.01139	8.22961	13.3522	10.8186	14.2765	14.6807	17.6274	17.5426	16.2455	15.9002	16.0961	14.6128	13.6351	14.4858
P26038	MSN	0	0	0	4.54373	3.5057	0	15.7085	14.4248	12.8489	12.2339	13.5143	15.4375	15.0421	20.7926	16.0961	12.9891	8.18107	24.1429
P05023	ATP1A1	10.0553	9.56938	16.632	9.84476	8.76424	9.25831	17.2793	19.4735	18.5595	12.8456	12.9267	11.929	14.4404	11.6194	14.2388	14.6128	14.5441	16.9
Q92945	KHSRP	0	0	0	17.4176	19.2813	22.6314	10.9959	10.8186	12.8489	10.3988	9.40126	11.2273	13.2371	12.8425	13.0007	15.4246	9.09008	16.0953
Q06210	GFPT1	20.1106	23.9234	20.79	17.4176	19.2813	17.4879	15.7085	18.7523	14.9904	14.069	11.164	15.4375	12.0337	11.6194	12.3816	11.3655	11.8171	11.2667
O75970	MPDZ	0	0	0	3.02916	5.25855	3.0861	21.9918	17.3098	22.8425	15.2924	18.2149	15.4375	11.432	8.56164	11.1434	8.93002	0	9.65717
Q14980	NUMA1	32.6797	26.3158	20.79	24.2332	36.8098	31.8897	4.71254	3.6062	5.71061	8.56374	5.87579	5.61364	10.2286	16.5117	11.7625	8.93002	15.4531	5.63335
Q92499	DDX1	0	7.17703	4.158	8.33018	10.5171	11.3157	14.1376	12.2611	11.4212	15.9041	14.6895	11.929	10.2286	8.56164	8.04804	8.1182	9.99909	7.24288
P05166	PCCB	326.797	351.675	278.586	39.379	36.8098	38.0619	21.9918	21.6372	22.1286	20.7977	23.5031	25.9631	16.8472	13.454	13.6198	17.86	14.5441	22.5334
P07900	HSP90AA1	10.0553	9.56938	12.474	12.1166	12.2699	12.3444	13.3522	14.4248	12.1351	11.6222	11.164	14.7358	16.2455	11.6194	14.2388	17.0482	16.3621	12.0715
P13797	PLS3	0	0	6.23701	13.6312	14.0228	15.4305	23.5627	29.5709	24.9839	28.138	27.0286	27.3665	15.6438	20.181	20.4296	26.7901	28.1793	15.2905
Q15365	PCBP1	10.0553	4.78469	6.23701	11.3593	11.3935	12.3444	11.7813	13.7036	12.1351	12.2339	12.3392	11.929	15.0421	14.6771	13.0007	17.86	17.2712	16.0953
O60664	PLIN3	0	0	8.31601	14.3885	17.5285	19.5453	18.8501	26.6859	21.4148	20.7977	21.1528	17.5426	14.4404	15.9002	15.477	21.9191	22.7252	25.7525
P49411	TUFM	27.6521	28.7081	27.027	9.08747	8.76424	9.25831	12.5668	11.5398	11.4212	12.2339	10.5764	9.12217	13.8387	11.0078	13.0007	12.9891	14.5441	10.4619
Q14195	DPYSL3	0	0	0	7.57289	8.76424	8.22961	11.7813	13.7036	7.8521	14.069	15.277	15.4375	12.6354	15.9002	16.0961	14.6128	13.6351	17.7048
Q12929	EPS8	0	0	0	6.05831	6.13497	6.1722	14.1376	20.1947	20.701	14.069	17.0398	17.5426	12.6354	13.454	13.0007	21.1073	19.0892	18.5096
Q9BQG0	MYBBP1A	0	0	0	5.30102	3.5057	3.0861	8.63965	2.88496	4.99679	9.78713	8.81368	7.71876	12.6354	9.17319	12.3816	8.93002	5.45405	8.85241
Q00839	HNRNPU	20.1106	16.7464	16.632	10.602	8.76424	14.4018	5.49796	5.04868	4.28296	3.67017	3.52547	4.21023	12.6354	7.9501	11.1434	14.6128	16.3621	12.8762
Q14974	KPNB1	0	0	0	11.3593	10.5171	15.4305	16.4939	12.9823	12.8489	10.3988	12.3392	12.6307	12.0337	11.6194	12.3816	16.2364	17.2712	13.681
Q9P273	TENM3	0	0	0	1.51458	1.75285	0	9.42507	13.7036	12.1351	14.069	10.5764	10.5256	11.432	14.0656	14.8579	8.93002	3.63603	6.43811
Q9Y3I0	RTCB	0	4.78469	0	12.8739	14.0228	14.4018	13.3522	12.2611	10.7074	11.0105	10.5764	11.2273	11.432	12.8425	12.3816	12.9891	13.6351	14.4858
Q8IY63	AMOTL1	0	0	0	0	0	0	9.42507	6.49116	9.99358	6.11696	5.28821	7.71876	10.2286	12.2309	10.5244	14.6128	4.54504	12.8762
Q9UBC2	EPS15L1	0	0	0	10.602	8.76424	13.3731	12.5668	9.37613	12.8489	10.3988	9.40126	9.82387	9.02527	8.56164	8.66712	5.68274	1.81802	8.85241
O60292	SIPA1L3	0	0	0	12.1166	8.76424	12.3444	14.923	9.37613	15.7042	9.17543	9.40126	8.42046	9.02527	8.56164	13.6198	4.0591	1.81802	8.85241
P62258	YWHAE	0	0	6.23701	10.602	15.7756	15.4305	18.8501	21.6372	20.701	17.7392	20.5653	18.2443	16.2455	15.2886	16.0961	21.9191	20.9072	20.1191
Q14847	LASP1	0	0	0	9.08747	8.76424	8.22961	20.421	24.5222	19.2733	22.021	18.2149	18.2443	15.6438	16.5117	19.1915	50.3328	47.2684	15.2905
P06733	ENO1	0	0	0	2.27187	1.75285	5.1435	1.57085	5.04868	1.42765	18.3509	17.6274	18.946	15.0421	21.4041	21.0487	24.3546	27.2702	24.9477
O60701	UGDH	12.5691	21.5311	14.553	9.08747	6.13497	8.22961	11.7813	10.8186	11.4212	12.8456	14.1019	14.0341	13.8387	11.0078	12.3816	16.2364	17.2712	10.4619
P38646	HSPA9	5.02765	0	4.158	12.1166	14.0228	16.4592	23.5627	18.031	16.418	9.17543	9.98884	10.5256	13.2371	15.9002	13.0007	10.5537	13.6351	16.9
P11940	PABPC1	20.1106	16.7464	10.395	26.5051	23.6635	24.6888	14.923	10.8186	10.7074	13.4573	13.5143	10.5256	12.0337	14.0656	13.0007	21.9191	22.7252	15.2905
P11586	MTHFD1	32.6797	19.1388	29.106	12.1166	11.3935	11.3157	14.1376	16.5885	14.2765	18.3509	17.6274	15.4375	11.432	7.33855	10.5244	12.9891	17.2712	8.04764
P49368	CCT3	25.1383	16.7464	16.632	6.8156	7.88782	8.22961	8.63965	7.21241	5.71061	9.17543	6.46336	8.42046	11.432	10.3963	9.2862	13.8009	16.3621	6.43811
Q13200	PSMD2	7.54148	0	10.395	9.84476	12.2699	13.3731	14.1376	12.2611	12.1351	12.2339	12.3392	11.2273	11.432	12.8425	13.0007	13.8009	11.8171	11.2667
Q92841	DDX17	27.6521	19.1388	12.474	13.6312	15.7756	18.5166	7.85423	7.21241	7.8521	9.17543	7.63852	7.71876	10.8303	9.17319	9.90528	17.0482	19.9982	10.4619
P41250	GARS1	7.54148	9.56938	10.395	5.30102	7.01139	4.1148	12.5668	12.9823	9.27975	9.17543	6.46336	6.31535	10.8303	9.17319	10.5244	8.93002	9.09008	9.65717
Q8WX93	PALLD	0	0	0	12.8739	9.64067	9.25831	13.3522	12.9823	16.418	11.0105	11.164	12.6307	10.2286	10.3963	8.04804	17.0482	12.7261	9.65717
Q01813	PFKP	12.5691	7.17703	8.31601	10.602	10.5171	9.25831	10.2105	10.0974	12.1351	11.6222	9.98884	11.2273	9.62696	10.3963	10.5244	12.1773	11.8171	11.2667
P17301	ITGA2	0	0	0	0	2.62927	2.0574	5.49796	4.32744	8.56592	7.95204	8.2261	9.12217	9.62696	7.33855	10.5244	10.5537	4.54504	9.65717
O60271	SPAG9	0	0	0	8.33018	6.13497	14.4018	7.0688	7.93365	5.71061	7.34035	7.05094	7.01705	9.02527	7.33855	9.90528	5.68274	2.72702	5.63335
Q9H4M9	EHD1	0	0	0	3.02916	3.5057	2.0574	6.28338	7.93365	8.56592	8.56374	8.2261	6.31535	9.02527	4.89237	9.90528	5.68274	6.36306	4.82859
Q15021	NCAPD2	0	0	0	11.3593	8.76424	14.4018	16.4939	8.65489	15.7042	10.3988	9.98884	13.3324	7.8219	11.0078	9.90528	5.68274	5.45405	8.04764
P35609	ACTN2	0	0	0	33.3207	36.8098	32.9184	24.3481	23.8009	28.5531	24.4678	24.6783	18.946	21.059	22.6272	21.0487	53.5801	24.5432	16.9
Q9BUF5	TUBB6	62.8457	50.2392	47.817	6.05831	7.88782	8.22961	16.4939	14.4248	13.5627	10.3988	12.3392	11.929	19.8556	19.5695	20.4296	20.2955	20.9072	15.2905
P63244	RACK1	30.1659	26.3158	31.185	15.9031	14.0228	11.3157	13.3522	12.2611	13.5627	9.78713	9.40126	9.12217	17.4489	15.9002	17.3342	17.86	19.0892	16.9
P36578	RPL4	25.1383	26.3158	35.343	16.6604	21.0342	17.4879	10.9959	10.0974	9.27975	11.6222	11.164	10.5256	17.4489	15.2886	16.7152	20.2955	29.0883	10.4619
Q14444	CAPRIN1	0	0	0	13.6312	13.1464	13.3731	9.42507	6.49116	9.27975	7.34035	5.87579	7.01705	14.4404	9.78474	11.7625	11.3655	9.09008	11.2667
Q9UHD8	SEPTIN9	0	0	0	10.602	7.01139	8.22961	11.7813	10.8186	9.99358	8.56374	9.98884	9.82387	13.2371	14.0656	11.1434	6.49456	3.63603	10.4619
Q9P0V3	SH3BP4	5.02765	9.56938	10.395	7.57289	5.25855	8.22961	19.6356	15.8673	19.2733	14.6807	10.5764	12.6307	12.6354	14.6771	17.9533	12.9891	16.3621	15.2905
O43242	PSMD3	25.1383	26.3158	22.869	12.8739	9.64067	12.3444	10.2105	10.8186	8.56592	9.17543	9.98884	11.2273	11.432	11.6194	9.2862	8.93002	10.9081	9.65717
O95373	IPO7	0	4.78469	0	9.08747	8.76424	12.3444	10.2105	8.65489	10.7074	9.17543	8.81368	10.5256	11.432	9.17319	11.7625	8.93002	9.99909	7.24288
P42566	EPS15	0	0	0	8.33018	7.88782	10.287	10.9959	8.65489	11.4212	7.34035	7.05094	8.42046	10.8303	12.8425	9.90528	4.0591	1.81802	8.85241
P04844	RPN2	35.1936	26.3158	29.106	7.57289	7.01139	9.25831	8.63965	9.37613	7.8521	9.78713	8.81368	11.929	10.2286	10.3963	8.66712	14.6128	14.5441	13.681
Q93008	USP9X	0	0	4.158	17.4176	18.4049	19.5453	7.85423	9.37613	10.7074	15.2924	13.5143	14.0341	10.2286	9.17319	12.3816	4.0591	2.72702	10.4619
Q92598	HSPH1	0	0	0	6.8156	6.13497	8.22961	9.42507	11.5398	11.4212	12.2339	11.164	11.929	10.2286	11.6194	11.1434	7.30638	3.63603	10.4619
P54136	RARS1	17.5968	16.7464	14.553	11.3593	11.3935	12.3444	9.42507	12.9823	8.56592	7.95204	10.5764	10.5256	10.2286	12.2309	9.2862	6.49456	9.09008	4.82859
Q4VCS5	AMOT	0	0	0	0	0	0	7.85423	8.65489	10.7074	6.11696	5.28821	7.01705	10.2286	12.2309	8.04804	12.9891	10.9081	19.3143
P78371	CCT2	0	0	0	6.8156	7.01139	9.25831	13.3522	7.93365	7.8521	11.6222	9.40126	12.6307	9.62696	7.33855	9.2862	10.5537	6.36306	14.4858
Q04721	NOTCH2	0	0	0	3.78644	3.5057	6.1722	10.2105	10.8186	12.8489	12.2339	9.98884	13.3324	9.62696	12.2309	9.90528	18.6719	10.9081	13.681
P50570	DNM2	10.0553	11.9617	12.474	6.05831	4.38212	6.1722	9.42507	10.0974	7.8521	8.56374	9.40126	10.5256	9.62696	6.72701	9.2862	8.1182	9.09008	5.63335
P22314	UBA1	0	0	0	9.84476	9.64067	11.3157	8.63965	10.0974	8.56592	11.6222	10.5764	11.2273	9.02527	10.3963	8.66712	8.1182	9.99909	12.0715
O60506	SYNCRIP	0	0	0	12.8739	14.0228	15.4305	7.85423	11.5398	10.7074	9.17543	8.81368	9.12217	9.02527	7.9501	6.80988	17.86	19.9982	12.8762
P50991	CCT4	10.0553	11.9617	10.395	3.02916	4.38212	4.1148	6.28338	5.04868	5.71061	5.50526	5.28821	6.31535	9.02527	6.72701	7.42896	7.30638	11.8171	7.24288
P49915	GMPS	5.02765	0	4.158	7.57289	8.76424	6.1722	11.7813	12.9823	13.5627	8.56374	9.40126	5.61364	8.42359	11.0078	8.66712	8.93002	9.09008	8.85241
O43795	MYO1B	20.1106	16.7464	20.79	7.57289	8.76424	4.1148	17.2793	9.37613	11.4212	9.78713	7.63852	10.5256	8.42359	5.50391	5.57172	6.49456	6.36306	8.85241
Q13418	ILK	0	0	0	6.05831	4.38212	4.1148	8.63965	10.0974	9.27975	10.3988	9.40126	9.82387	8.42359	8.56164	8.04804	7.30638	8.18107	8.04764
P63261	ACTG1	25.1383	23.9234	22.869	39.379	38.5627	36.0045	27.4898	26.6859	24.9839	29.3614	27.0286	24.5597	55.355	64.8239	54.479	66.5692	60.9036	57.1383
P04406	GAPDH	27.6521	21.5311	14.553	9.08747	5.25855	8.22961	9.42507	10.8186	9.99358	15.2924	19.9777	28.0682	20.4573	13.454	19.8106	19.4837	29.0883	22.5334
P12236	SLC25A6	45.2489	40.6699	37.422	12.1166	12.2699	12.3444	18.0647	13.7036	12.8489	11.0105	11.7516	11.929	19.8556	18.9579	19.1915	15.4246	16.3621	13.681
P05556	ITGB1	0	0	10.395	6.05831	5.25855	6.1722	11.7813	10.8186	12.8489	11.6222	12.3392	14.7358	16.8472	20.7926	16.7152	17.86	15.4531	17.7048
P18124	RPL7	30.1659	33.4928	27.027	7.57289	9.64067	10.287	6.28338	8.65489	7.8521	9.17543	9.40126	11.2273	16.2455	18.3464	23.525	13.8009	20.9072	8.85241
P06748	NPM1	7.54148	7.17703	0	18.1749	21.0342	19.5453	10.9959	14.4248	11.4212	9.17543	9.40126	9.12217	14.4404	11.0078	11.7625	21.1073	28.1793	16.0953
P04083	ANXA1	0	0	0	9.84476	10.5171	12.3444	11.7813	11.5398	11.4212	10.3988	11.7516	11.929	14.4404	16.5117	15.477	17.0482	15.4531	17.7048
P37802	TAGLN2	0	0	8.31601	8.33018	7.88782	6.1722	13.3522	14.4248	11.4212	12.2339	11.7516	14.7358	14.4404	12.8425	14.2388	28.4137	42.7234	16.0953
P61204	ARF3	22.6244	23.9234	14.553	7.57289	7.01139	8.22961	10.9959	8.65489	8.56592	12.2339	11.7516	11.2273	13.2371	15.2886	13.0007	15.4246	18.1802	16.0953
Q99623	PHB2	22.6244	28.7081	16.632	6.05831	10.5171	11.3157	7.0688	5.04868	6.42444	7.95204	6.46336	7.71876	13.2371	13.454	9.90528	15.4246	19.0892	13.681
P15170	GSPT1	0	0	0	6.05831	4.38212	7.20091	10.9959	12.9823	14.2765	8.56374	7.63852	9.82387	13.2371	9.78474	11.1434	12.1773	6.36306	9.65717
O14974	PPP1R12A	0	0	0	6.8156	7.01139	8.22961	19.6356	16.5885	17.8457	17.1275	15.277	14.7358	12.6354	10.3963	14.8579	4.87092	8.18107	13.681
Q16555	DPYSL2	0	0	0	12.8739	8.76424	14.4018	12.5668	12.9823	11.4212	13.4573	13.5143	11.2273	12.0337	14.0656	13.0007	13.8009	6.36306	16.0953
Q63ZY3	KANK2	0	0	6.23701	12.8739	13.1464	12.3444	13.3522	8.65489	9.99358	8.56374	9.40126	11.2273	11.432	17.1233	13.0007	9.74184	6.36306	15.2905
Q93052	LPP	0	0	0	9.08747	11.3935	13.3731	10.2105	13.7036	9.99358	11.6222	11.164	10.5256	11.432	12.2309	13.0007	15.4246	15.4531	16.0953
Q32MZ4	LRRFIP1	0	0	0	20.4468	19.2813	20.574	8.63965	11.5398	9.99358	9.78713	8.2261	10.5256	11.432	7.33855	9.90528	6.49456	4.54504	9.65717
Q15019	SEPTIN2	0	0	4.158	6.8156	7.01139	7.20091	10.9959	11.5398	13.5627	12.2339	12.3392	11.2273	10.8303	10.3963	16.0961	4.87092	6.36306	15.2905
P22695	UQCRC2	27.6521	23.9234	27.027	12.1166	9.64067	11.3157	6.28338	6.49116	5.71061	6.72865	5.87579	7.01705	10.8303	7.9501	11.7625	8.93002	10.9081	8.85241
Q9BZQ8	NIBAN1	0	0	0	6.8156	5.25855	7.20091	11.7813	14.4248	11.4212	9.17543	9.40126	11.2273	10.2286	9.17319	9.90528	8.93002	7.27207	8.85241
Q9NR12	PDLIM7	0	0	0	3.78644	6.13497	3.0861	7.0688	7.21241	6.42444	9.17543	5.87579	5.61364	10.2286	10.3963	10.5244	12.9891	8.18107	11.2667
P06493	CDK1	0	4.78469	8.31601	7.57289	6.13497	5.1435	7.85423	7.93365	8.56592	5.50526	8.2261	9.12217	9.62696	9.17319	9.2862	8.93002	7.27207	10.4619
Q99613	EIF3C	0	0	0	11.3593	8.76424	12.3444	7.85423	5.76992	6.42444	6.11696	5.87579	9.12217	9.62696	7.9501	11.1434	8.93002	9.99909	10.4619
P19022	CDH2	0	0	0	4.54373	2.62927	2.0574	11.7813	14.4248	14.2765	12.2339	11.164	14.0341	9.62696	7.33855	8.66712	12.9891	9.09008	9.65717
P48444	ARCN1	12.5691	7.17703	10.395	2.27187	3.5057	3.0861	5.49796	9.37613	6.42444	9.17543	8.81368	12.6307	9.62696	7.33855	9.2862	7.30638	7.27207	7.24288
O94851	MICAL2	0	0	0	8.33018	8.76424	9.25831	7.85423	5.04868	7.8521	6.72865	8.2261	4.91194	9.02527	6.72701	8.66712	4.87092	1.81802	8.04764
P63010	AP2B1	0	0	0	5.30102	4.38212	0	5.49796	6.49116	3.56913	8.56374	8.81368	7.71876	9.02527	4.89237	4.95264	5.68274	1.81802	5.63335
P55884	EIF3B	0	0	0	13.6312	11.3935	16.4592	10.2105	9.37613	9.27975	8.56374	5.28821	9.12217	9.02527	9.17319	9.2862	8.1182	9.09008	7.24288
P53992	SEC24C	0	0	0	6.8156	5.25855	9.25831	14.1376	9.37613	15.7042	11.0105	12.3392	11.2273	8.42359	7.9501	10.5244	10.5537	10.9081	15.2905
Q12959	DLG1	0	0	0	6.8156	5.25855	5.1435	11.7813	13.7036	13.5627	11.0105	11.164	14.0341	8.42359	11.0078	11.7625	15.4246	7.27207	12.8762
Q86UU1	PHLDB1	0	0	0	3.78644	4.38212	3.0861	4.71254	6.49116	7.13827	10.3988	9.98884	8.42046	8.42359	9.78474	8.66712	8.1182	6.36306	11.2667
Q7KZF4	SND1	0	0	0	12.1166	9.64067	12.3444	7.85423	13.7036	9.27975	9.17543	10.5764	10.5256	7.8219	7.33855	8.66712	10.5537	16.3621	14.4858
O15027	SEC16A	0	0	0	9.84476	12.2699	11.3157	2.35627	2.16372	3.56913	4.89356	4.11305	3.50853	7.8219	7.33855	6.1908	0	0	1.60953
P14625	HSP90B1	12.5691	7.17703	10.395	9.84476	6.13497	11.3157	3.92711	3.6062	2.85531	7.34035	7.05094	7.71876	7.8219	6.72701	9.2862	9.74184	13.6351	7.24288
Q08211	DHX9	10.0553	11.9617	10.395	16.6604	18.4049	20.574	7.0688	2.88496	3.56913	7.34035	8.2261	9.12217	7.8219	6.72701	7.42896	12.1773	13.6351	12.8762
Q9BSJ8	ESYT1	0	0	4.158	9.84476	9.64067	8.22961	12.5668	12.2611	9.27975	11.6222	9.40126	11.2273	7.22022	9.17319	8.66712	5.68274	5.45405	14.4858
O43143	DHX15	0	0	0	11.3593	12.2699	8.22961	10.2105	6.49116	8.56592	7.34035	7.63852	6.31535	7.22022	14.0656	11.1434	14.6128	12.7261	15.2905
Q8TDM6	DLG5	0	0	0	4.54373	4.38212	6.1722	14.1376	10.0974	12.8489	6.72865	6.46336	9.82387	7.22022	9.17319	7.42896	2.43546	2.72702	10.4619
P20073	ANXA7	0	0	6.23701	7.57289	7.01139	7.20091	11.7813	12.2611	12.1351	10.3988	12.9267	9.12217	19.8556	23.8503	26.6204	57.6392	53.6315	17.7048
Q15942	ZYX	0	0	0	12.8739	16.6521	17.4879	9.42507	10.0974	10.7074	6.72865	8.2261	8.42046	16.2455	15.9002	16.0961	20.2955	17.2712	14.4858
P04075	ALDOA	0	0	8.31601	13.6312	21.9106	21.6027	14.1376	15.8673	11.4212	13.4573	18.2149	16.8409	15.6438	17.1233	18.5724	34.0964	31.8153	15.2905
P46781	RPS9	32.6797	38.2775	27.027	12.8739	12.2699	12.3444	10.9959	10.0974	9.99358	8.56374	8.81368	11.2273	15.0421	13.454	13.0007	13.8009	15.4531	9.65717
Q06830	PRDX1	7.54148	0	10.395	12.1166	13.1464	14.4018	8.63965	10.8186	8.56592	9.17543	8.81368	8.42046	14.4404	13.454	14.2388	23.5428	18.1802	15.2905
Q00325	SLC25A3	20.1106	21.5311	31.185	6.05831	6.13497	3.0861	7.0688	8.65489	7.8521	8.56374	7.05094	7.71876	13.8387	11.0078	9.90528	8.1182	8.18107	4.82859
Q01995	TAGLN	0	0	0	6.05831	7.01139	8.22961	12.5668	14.4248	10.7074	11.0105	14.6895	10.5256	13.8387	14.0656	16.0961	27.6019	29.0883	14.4858
Q02878	RPL6	20.1106	11.9617	16.632	3.78644	7.88782	8.22961	7.0688	6.49116	7.8521	7.95204	7.05094	7.71876	13.8387	12.8425	13.0007	8.1182	12.7261	9.65717
P23921	RRM1	0	0	0	24.9905	16.6521	11.3157	8.63965	7.93365	8.56592	6.72865	5.87579	8.42046	12.0337	10.3963	11.7625	17.0482	11.8171	15.2905
Q05682	CALD1	0	0	0	9.08747	9.64067	9.25831	21.2064	43.2744	26.4116	17.7392	28.2038	28.0682	11.432	11.0078	8.66712	8.1182	8.18107	12.0715
P33991	MCM4	7.54148	4.78469	6.23701	7.57289	3.5057	3.0861	3.92711	6.49116	4.99679	1.22339	2.35031	3.50853	11.432	9.17319	9.90528	4.87092	6.36306	6.43811
Q15366	PCBP2	12.5691	14.3541	8.31601	2.27187	2.62927	3.0861	4.71254	3.6062	3.56913	2.44678	2.93789	2.80682	10.8303	11.0078	7.42896	9.74184	7.27207	8.85241
O75410	TACC1	0	0	0	13.6312	11.3935	13.3731	9.42507	7.93365	9.99358	7.34035	7.05094	7.71876	10.2286	11.0078	10.5244	3.24728	0	8.85241
P30530	AXL	5.02765	0	4.158	5.30102	4.38212	5.1435	7.0688	7.21241	8.56592	5.50526	5.28821	7.71876	10.2286	7.9501	8.04804	7.30638	7.27207	16.0953
O15523	DDX3Y	15.083	14.3541	10.395	11.3593	9.64067	14.4018	10.2105	10.0974	13.5627	10.3988	10.5764	15.4375	10.2286	10.3963	12.3816	17.0482	12.7261	8.85241
P22234	PAICS	0	0	0	9.84476	9.64067	11.3157	10.9959	10.8186	10.7074	6.72865	7.63852	6.31535	10.2286	10.3963	9.90528	8.1182	9.09008	11.2667
Q8WWM7	ATXN2L	0	0	0	27.2624	14.0228	16.4592	8.63965	7.21241	10.7074	8.56374	9.40126	7.01705	10.2286	7.33855	8.66712	9.74184	4.54504	8.04764
Q16204	CCDC6	0	0	0	7.57289	7.01139	8.22961	7.0688	7.93365	7.13827	6.72865	7.05094	7.71876	9.62696	6.72701	9.90528	8.93002	5.45405	8.04764
Q16181	SEPTIN7	0	0	0	5.30102	5.25855	6.1722	8.63965	10.0974	12.1351	7.95204	8.2261	9.12217	9.62696	10.3963	11.1434	4.87092	3.63603	5.63335
P51149	RAB7A	0	0	0	6.05831	6.13497	7.20091	10.2105	10.8186	10.7074	8.56374	7.63852	10.5256	9.02527	11.0078	8.66712	20.2955	20.9072	11.2667
P56945	BCAR1	0	0	0	7.57289	6.13497	9.25831	4.71254	6.49116	6.42444	7.95204	8.81368	8.42046	9.02527	9.17319	9.2862	12.1773	7.27207	11.2667
P40227	CCT6A	15.083	11.9617	10.395	3.02916	3.5057	4.1148	5.49796	7.21241	7.13827	6.72865	7.63852	7.01705	9.02527	10.3963	8.66712	9.74184	8.18107	8.85241
Q5JSZ5	PRRC2B	0	0	0	14.3885	12.2699	12.3444	5.49796	5.04868	6.42444	5.50526	2.93789	2.80682	9.02527	11.6194	7.42896	2.43546	2.72702	8.85241
Q27J81	INF2	0	0	0	16.6604	12.2699	13.3731	10.2105	10.8186	13.5627	11.0105	9.40126	8.42046	8.42359	9.78474	6.80988	4.87092	4.54504	8.85241
P61978	HNRNPK	5.02765	4.78469	6.23701	19.6895	21.9106	14.4018	9.42507	8.65489	8.56592	8.56374	6.46336	6.31535	8.42359	7.33855	8.04804	15.4246	13.6351	13.681
Q99873	PRMT1	0	0	4.158	12.1166	10.5171	11.3157	10.9959	10.8186	9.99358	9.17543	8.2261	8.42046	8.42359	8.56164	9.90528	9.74184	9.09008	13.681
Q13263	TRIM28	0	0	0	15.1458	14.0228	13.3731	6.28338	5.76992	4.28296	5.50526	4.70063	5.61364	7.8219	8.56164	9.90528	5.68274	4.54504	8.04764
Q9Y6A5	TACC3	0	0	0	8.33018	6.13497	10.287	7.0688	6.49116	7.13827	1.83509	1.76274	2.80682	7.8219	10.3963	9.2862	0	0	3.21906
Q12931	TRAP1	5.02765	4.78469	14.553	5.30102	2.62927	4.1148	6.28338	5.04868	6.42444	5.50526	4.70063	4.91194	7.8219	8.56164	7.42896	9.74184	11.8171	9.65717
O15371	EIF3D	0	0	0	6.05831	7.01139	6.1722	3.14169	3.6062	2.14148	4.28187	3.52547	3.50853	7.8219	6.72701	4.33356	7.30638	8.18107	6.43811
Q07866	KLC1	0	0	0	7.57289	10.5171	10.287	10.2105	12.2611	9.99358	9.17543	9.40126	10.5256	7.8219	7.33855	9.2862	7.30638	2.72702	5.63335
Q15678	PTPN14	0	0	0	2.27187	3.5057	2.0574	8.63965	7.93365	10.7074	7.95204	8.2261	7.71876	7.22022	5.50391	6.80988	4.0591	2.72702	6.43811
Q14157	UBAP2L	0	0	0	8.33018	10.5171	11.3157	9.42507	10.0974	10.7074	7.95204	11.164	9.82387	7.22022	3.66928	5.57172	10.5537	12.7261	10.4619
P51610	HCFC1	0	0	0	8.33018	7.88782	8.22961	3.14169	2.16372	2.85531	0	2.93789	1.40341	7.22022	5.50391	5.57172	1.62364	1.81802	4.02382
Q5M775	SPECC1	0	0	0	5.30102	5.25855	3.0861	5.49796	5.76992	6.42444	4.89356	5.87579	9.82387	7.22022	4.89237	6.1908	3.24728	0	5.63335
P35998	PSMC2	7.54148	11.9617	16.632	5.30102	7.88782	10.287	9.42507	10.8186	9.27975	9.17543	8.2261	9.82387	7.22022	6.72701	7.42896	6.49456	8.18107	10.4619
Q96HC4	PDLIM5	0	0	0	7.57289	7.01139	9.25831	7.85423	9.37613	9.27975	6.72865	7.63852	9.12217	7.22022	8.56164	6.80988	9.74184	7.27207	7.24288
Q9NZB2	FAM120A	17.5968	16.7464	16.632	21.9614	17.5285	11.3157	9.42507	9.37613	8.56592	9.78713	10.5764	8.42046	7.22022	13.454	8.66712	5.68274	6.36306	12.0715
P60228	EIF3E	0	0	0	10.602	12.2699	11.3157	7.0688	6.49116	6.42444	9.78713	8.2261	9.12217	6.61853	4.89237	6.1908	5.68274	7.27207	2.41429
P49588	AARS1	0	0	0	7.57289	9.64067	9.25831	18.0647	20.916	17.8457	14.069	17.6274	15.4375	6.61853	7.33855	8.04804	8.1182	9.99909	9.65717
P40763	STAT3	0	4.78469	0	6.8156	7.01139	8.22961	8.63965	8.65489	7.13827	7.95204	7.63852	7.71876	6.61853	7.33855	7.42896	7.30638	5.45405	8.85241
P55196	AFDN	0	0	0	2.27187	3.5057	3.0861	7.85423	10.0974	7.8521	9.17543	9.98884	11.2273	6.61853	6.11546	6.80988	7.30638	3.63603	8.04764
P22102	GART	0	0	6.23701	6.05831	6.13497	4.1148	12.5668	12.9823	12.8489	11.6222	9.98884	14.7358	6.61853	8.56164	9.2862	7.30638	6.36306	3.21906
Q86SQ0	PHLDB2	0	0	0	6.8156	5.25855	6.1722	10.2105	10.0974	11.4212	11.0105	9.98884	9.12217	6.61853	9.17319	8.04804	12.1773	7.27207	10.4619
P06756	ITGAV	0	0	0	1.51458	0	0	9.42507	8.65489	4.99679	9.17543	9.40126	9.12217	6.61853	6.11546	6.80988	8.93002	4.54504	11.2667
Q5VYK3	ECPAS	0	0	0	3.02916	2.62927	4.1148	4.71254	3.6062	2.85531	4.28187	5.28821	6.31535	6.61853	2.44618	3.0954	2.43546	0	0
Q9UQ35	SRRM2	12.5691	11.9617	12.474	14.3885	17.5285	17.4879	10.9959	5.04868	8.56592	6.11696	4.70063	6.31535	6.61853	10.3963	9.2862	8.93002	15.4531	8.04764
Q9ULW0	TPX2	0	0	0	13.6312	10.5171	7.20091	3.92711	2.16372	8.56592	1.22339	0	0	6.61853	9.17319	8.04804	2.43546	0	3.21906
P62495	ETF1	7.54148	7.17703	6.23701	3.02916	0	3.0861	5.49796	5.04868	6.42444	5.50526	5.28821	4.21023	6.61853	3.66928	6.1908	4.87092	2.72702	1.60953
Q12802	AKAP13	0	0	0	14.3885	17.5285	18.5166	7.0688	2.16372	4.99679	6.11696	4.70063	4.91194	6.01685	9.17319	5.57172	0	0	4.02382
Q8NEY1	NAV1	0	0	0	10.602	10.5171	10.287	7.85423	3.6062	9.27975	7.95204	7.63852	7.01705	6.01685	6.11546	4.33356	0	0	1.60953
P61313	RPL15	25.1383	16.7464	18.711	33.3207	26.2927	18.5166	5.49796	6.49116	4.99679	3.05848	5.28821	5.61364	30.0842	37.3043	28.4777	23.5428	11.8171	13.681
P62249	RPS16	20.1106	28.7081	20.79	9.84476	6.13497	8.22961	7.85423	7.93365	5.71061	7.34035	8.2261	8.42046	18.0505	14.6771	13.0007	14.6128	16.3621	10.4619
P18085	ARF4	17.5968	16.7464	31.185	14.3885	7.88782	5.1435	3.92711	5.04868	5.71061	6.11696	6.46336	8.42046	14.4404	12.2309	11.7625	8.1182	9.09008	8.85241
P04792	HSPB1	52.7903	47.8469	49.896	9.84476	10.5171	8.22961	11.7813	10.8186	12.8489	8.56374	8.81368	12.6307	13.2371	10.3963	11.7625	17.0482	23.6342	11.2667
P26006	ITGA3	0	0	0	1.51458	2.62927	2.0574	12.5668	13.7036	9.99358	9.17543	12.9267	11.929	13.2371	10.3963	12.3816	15.4246	8.18107	13.681
P34931	HSPA1L	5.02765	4.78469	4.158	6.05831	7.01139	7.20091	6.28338	5.04868	3.56913	7.34035	6.46336	7.01705	10.8303	12.2309	11.1434	6.49456	3.63603	12.8762
Q8NCA5	FAM98A	0	0	0	7.57289	6.13497	7.20091	4.71254	4.32744	4.99679	7.34035	5.87579	4.21023	10.2286	9.17319	7.42896	7.30638	7.27207	9.65717
P20810	CAST	0	0	0	9.84476	9.64067	7.20091	8.63965	12.9823	12.8489	11.0105	12.9267	11.929	9.62696	11.0078	9.90528	8.1182	6.36306	13.681
P29317	EPHA2	0	0	0	0	1.75285	0	8.63965	7.93365	8.56592	9.17543	8.2261	9.82387	9.02527	7.9501	7.42896	8.93002	4.54504	5.63335
P08648	ITGA5	0	0	0	4.54373	3.5057	4.1148	7.0688	6.49116	3.56913	6.72865	7.05094	8.42046	9.02527	7.9501	7.42896	5.68274	5.45405	7.24288
P62750	RPL23A	57.818	64.5933	45.738	25.7478	30.6748	25.7175	15.7085	11.5398	12.1351	6.72865	6.46336	4.91194	9.02527	7.33855	8.04804	10.5537	13.6351	5.63335
Q15393	SF3B3	0	0	0	12.8739	10.5171	14.4018	8.63965	7.93365	7.8521	4.89356	5.28821	6.31535	8.42359	4.89237	7.42896	3.24728	2.72702	7.24288
Q9UJU6	DBNL	0	0	0	10.602	9.64067	11.3157	8.63965	13.7036	7.8521	7.95204	7.63852	4.91194	8.42359	10.3963	12.3816	12.1773	16.3621	13.681
Q15436	SEC23A	0	0	6.23701	4.54373	3.5057	3.0861	9.42507	12.2611	11.4212	9.17543	11.164	10.5256	8.42359	6.72701	11.7625	6.49456	6.36306	14.4858
Q9Y265	RUVBL1	0	4.78469	4.158	11.3593	8.76424	11.3157	8.63965	11.5398	11.4212	11.6222	11.164	12.6307	8.42359	7.9501	7.42896	10.5537	16.3621	12.0715
P62191	PSMC1	0	0	0	5.30102	3.5057	5.1435	7.0688	5.76992	6.42444	6.72865	5.28821	6.31535	7.8219	7.33855	8.04804	6.49456	4.54504	8.85241
Q16643	DBN1	0	0	0	6.8156	9.64067	8.22961	8.63965	13.7036	12.8489	5.50526	5.28821	6.31535	7.8219	7.9501	9.2862	7.30638	7.27207	10.4619
O75534	CSDE1	0	0	0	5.30102	7.01139	8.22961	10.9959	10.8186	10.7074	9.78713	8.2261	9.12217	7.8219	5.50391	7.42896	7.30638	6.36306	8.04764
Q9H792	PEAK1	0	0	0	6.05831	4.38212	3.0861	10.2105	9.37613	11.4212	7.95204	7.63852	6.31535	7.22022	9.17319	4.95264	1.62364	0	9.65717
O14786	NRP1	0	0	0	1.51458	2.62927	3.0861	10.2105	7.93365	9.99358	7.95204	9.98884	11.2273	7.22022	9.78474	6.80988	10.5537	9.99909	12.8762
Q9Y5X1	SNX9	0	0	0	8.33018	8.76424	8.22961	7.0688	7.93365	7.8521	9.78713	10.5764	9.82387	7.22022	7.33855	9.2862	9.74184	9.09008	8.04764
Q6DD88	ATL3	15.083	11.9617	14.553	4.54373	6.13497	6.1722	3.92711	5.04868	6.42444	6.72865	5.87579	4.91194	7.22022	6.11546	4.95264	7.30638	5.45405	3.21906
P29692	EEF1D	0	0	0	9.84476	8.76424	9.25831	7.0688	5.76992	5.71061	6.11696	5.87579	7.01705	7.22022	6.11546	6.1908	6.49456	5.45405	7.24288
P17980	PSMC3	0	0	0	7.57289	7.01139	7.20091	7.85423	8.65489	6.42444	9.78713	7.63852	10.5256	7.22022	7.9501	6.1908	7.30638	4.54504	8.85241
P10809	HSPD1	15.083	9.56938	8.31601	5.30102	7.88782	8.22961	4.71254	5.76992	6.42444	7.34035	7.63852	7.71876	7.22022	3.05773	6.1908	13.8009	17.2712	8.04764
Q5T4S7	UBR4	0	0	0	13.6312	18.4049	16.4592	6.28338	4.32744	6.42444	12.8456	11.7516	14.7358	7.22022	11.0078	4.95264	3.24728	4.54504	3.21906
Q9P2J5	LARS1	20.1106	19.1388	22.869	8.33018	10.5171	12.3444	11.7813	8.65489	10.7074	10.3988	9.98884	10.5256	7.22022	8.56164	8.66712	8.93002	9.99909	5.63335
O60488	ACSL4	0	0	0	0	0	0	7.85423	7.93365	6.42444	4.89356	7.05094	8.42046	7.22022	6.11546	6.80988	8.1182	6.36306	6.43811
P11216	PYGB	17.5968	11.9617	16.632	6.05831	6.13497	6.1722	6.28338	6.49116	6.42444	9.78713	9.40126	9.82387	7.22022	3.66928	6.80988	8.1182	7.27207	6.43811
P17844	DDX5	0	7.17703	6.23701	5.30102	7.88782	8.22961	6.28338	2.88496	3.56913	4.28187	5.28821	4.21023	7.22022	3.66928	5.57172	4.87092	9.99909	4.82859
P52732	KIF11	0	0	0	9.84476	10.5171	10.287	7.0688	3.6062	6.42444	3.05848	2.35031	4.91194	6.61853	4.89237	4.95264	0	0	2.41429
P20936	RASA1	0	0	0	3.78644	3.5057	4.1148	7.85423	7.93365	7.8521	11.6222	9.98884	8.42046	6.61853	5.50391	7.42896	4.87092	6.36306	6.43811
P33176	KIF5B	0	0	0	11.3593	8.76424	8.22961	6.28338	5.76992	7.13827	6.11696	5.28821	8.42046	6.61853	6.72701	4.33356	8.1182	4.54504	3.21906
Q9P2E9	RRBP1	50.2765	57.4163	45.738	28.777	28.922	18.5166	8.63965	7.21241	7.8521	9.78713	8.81368	7.71876	6.61853	6.72701	4.33356	16.2364	19.9982	12.0715
Q9UBB4	ATXN10	0	0	0	4.54373	4.38212	7.20091	9.42507	7.21241	6.42444	6.11696	6.46336	7.01705	6.61853	7.33855	7.42896	6.49456	9.09008	12.0715
Q96QK1	VPS35	0	0	0	6.8156	8.76424	9.25831	9.42507	10.0974	9.27975	7.95204	6.46336	6.31535	6.61853	6.72701	5.57172	4.87092	8.18107	6.43811
Q8TD19	NEK9	0	0	0	10.602	10.5171	10.287	12.5668	10.8186	9.27975	9.17543	7.05094	8.42046	6.61853	7.33855	6.1908	4.0591	3.63603	8.85241
P50990	CCT8	0	0	0	6.05831	7.88782	6.1722	7.85423	7.21241	7.13827	5.50526	7.63852	6.31535	6.61853	7.9501	7.42896	8.1182	7.27207	8.85241
P62195	PSMC5	10.0553	9.56938	8.31601	6.8156	3.5057	6.1722	4.71254	5.04868	5.71061	6.11696	5.28821	6.31535	6.01685	6.72701	4.95264	5.68274	7.27207	4.82859
O75179	ANKRD17	0	0	0	8.33018	9.64067	11.3157	8.63965	5.76992	7.13827	9.78713	7.63852	7.71876	6.01685	6.11546	6.80988	3.24728	2.72702	6.43811
Q9Y520	PRRC2C	0	0	0	9.08747	8.76424	9.25831	6.28338	2.88496	6.42444	4.89356	5.28821	0	6.01685	8.56164	5.57172	0	0	2.41429
Q9NTJ3	SMC4	0	0	6.23701	8.33018	13.1464	9.25831	8.63965	5.76992	8.56592	6.11696	3.52547	4.21023	6.01685	8.56164	9.2862	3.24728	3.63603	5.63335
P49736	MCM2	0	0	4.158	6.8156	6.13497	5.1435	2.35627	2.16372	4.28296	3.05848	2.93789	4.21023	6.01685	3.05773	6.80988	4.87092	5.45405	4.02382
Q92900	UPF1	5.02765	4.78469	8.31601	9.84476	9.64067	13.3731	3.92711	5.04868	7.13827	7.95204	11.7516	9.12217	6.01685	6.72701	5.57172	9.74184	11.8171	8.85241
P49589	CARS1	0	0	0	6.8156	7.88782	9.25831	8.63965	11.5398	9.27975	6.72865	8.2261	7.71876	6.01685	7.9501	6.1908	7.30638	2.72702	10.4619
Q16513	PKN2	0	0	4.158	4.54373	6.13497	4.1148	13.3522	10.8186	12.8489	8.56374	9.40126	7.71876	6.01685	6.11546	9.2862	9.74184	3.63603	8.85241
Q07954	LRP1	0	0	0	4.54373	5.25855	2.0574	0	0	0	3.67017	3.52547	1.40341	6.01685	1.22309	2.47632	0	0	2.41429
O95347	SMC2	10.0553	4.78469	4.158	10.602	11.3935	9.25831	7.0688	5.76992	7.13827	4.89356	3.52547	4.91194	6.01685	6.11546	3.0954	0	5.45405	2.41429
O75165	DNAJC13	10.0553	7.17703	8.31601	12.1166	11.3935	14.4018	7.0688	6.49116	7.13827	7.34035	8.2261	8.42046	5.41516	8.56164	6.1908	6.49456	10.9081	5.63335
Q9NR09	BIRC6	0	0	0	12.8739	9.64067	13.3731	7.85423	6.49116	6.42444	7.34035	4.70063	9.82387	5.41516	11.0078	4.33356	0	2.72702	5.63335
Q92621	NUP205	5.02765	4.78469	8.31601	3.78644	3.5057	0	3.14169	3.6062	4.99679	2.44678	1.76274	3.50853	5.41516	4.89237	5.57172	1.62364	2.72702	1.60953
P52701	MSH6	0	0	0	7.57289	7.01139	11.3157	3.92711	7.21241	4.99679	6.11696	5.87579	2.80682	5.41516	3.66928	6.80988	3.24728	5.45405	3.21906
O75815	BCAR3	0	0	0	2.27187	0	0	6.28338	7.93365	6.42444	2.44678	4.11305	2.80682	5.41516	6.11546	5.57172	0	0	5.63335
P15880	RPS2	25.1383	28.7081	24.948	12.1166	9.64067	8.22961	9.42507	10.8186	9.99358	7.95204	8.2261	10.5256	18.0505	15.2886	16.7152	14.6128	13.6351	8.04764
P61247	RPS3A	15.083	11.9617	12.474	4.54373	3.5057	6.1722	5.49796	4.32744	4.28296	4.28187	8.2261	4.91194	16.8472	14.6771	15.477	8.93002	19.0892	7.24288
P62424	RPL7A	30.1659	21.5311	18.711	12.8739	11.3935	12.3444	6.28338	8.65489	7.13827	7.34035	7.05094	8.42046	14.4404	15.9002	13.0007	13.8009	15.4531	12.8762
P62701	RPS4X	15.083	14.3541	18.711	6.8156	8.76424	12.3444	7.0688	7.21241	8.56592	7.95204	7.63852	9.82387	13.2371	8.56164	10.5244	12.1773	19.0892	6.43811
P00338	LDHA	10.0553	7.17703	4.158	9.08747	9.64067	11.3157	10.2105	10.8186	10.7074	9.78713	9.98884	11.2273	12.0337	11.6194	11.1434	21.1073	22.7252	13.681
Q96IZ0	PAWR	0	0	0	12.1166	12.2699	12.3444	9.42507	9.37613	9.27975	6.72865	7.05094	9.12217	10.8303	12.8425	13.0007	10.5537	11.8171	12.8762
O14964	HGS	0	0	0	6.8156	7.01139	7.20091	7.0688	9.37613	7.8521	8.56374	10.5764	10.5256	9.02527	7.33855	9.2862	9.74184	12.7261	12.0715
P51114	FXR1	0	0	0	9.08747	7.88782	9.25831	8.63965	7.21241	7.13827	5.50526	7.63852	5.61364	8.42359	7.9501	6.80988	8.93002	8.18107	9.65717
P51148	RAB5C	10.0553	7.17703	6.23701	6.8156	6.13497	7.20091	10.2105	18.7523	8.56592	7.95204	8.2261	9.12217	8.42359	11.0078	10.5244	13.8009	17.2712	11.2667
Q14258	TRIM25	0	0	0	8.33018	8.76424	8.22961	6.28338	8.65489	9.99358	6.72865	7.63852	5.61364	8.42359	7.9501	6.80988	4.87092	4.54504	10.4619
P27824	CANX	0	0	0	1.51458	4.38212	4.1148	2.35627	2.16372	3.56913	7.95204	8.81368	7.71876	7.8219	6.11546	6.80988	8.93002	9.09008	5.63335
Q6NYC8	PPP1R18	0	0	0	4.54373	7.01139	6.1722	10.2105	7.93365	9.99358	9.17543	8.81368	9.12217	7.8219	6.11546	10.5244	8.93002	8.18107	8.85241
Q9BVA1	TUBB2B	25.1383	19.1388	20.79	5.30102	3.5057	3.0861	6.28338	7.21241	7.13827	5.50526	5.28821	4.91194	7.22022	5.50391	5.57172	5.68274	8.18107	9.65717
P52292	KPNA2	0	0	0	6.05831	6.13497	5.1435	6.28338	5.76992	5.71061	4.28187	4.11305	4.91194	6.61853	7.33855	8.66712	5.68274	7.27207	6.43811
Q6PKG0	LARP1	0	0	0	6.05831	8.76424	11.3157	6.28338	7.21241	5.71061	7.95204	8.2261	4.91194	6.61853	6.11546	5.57172	5.68274	5.45405	6.43811
Q9Y3F4	STRAP	0	0	0	6.05831	5.25855	6.1722	7.0688	5.76992	5.71061	6.72865	7.05094	4.91194	6.61853	4.28082	4.33356	4.87092	5.45405	3.21906
Q99832	CCT7	0	0	0	3.78644	5.25855	4.1148	3.92711	3.6062	2.14148	6.72865	6.46336	7.01705	6.61853	3.05773	4.33356	5.68274	8.18107	4.02382
Q96BY6	DOCK10	0	0	0	1.51458	0	0	4.71254	3.6062	4.28296	6.11696	4.11305	4.91194	6.61853	8.56164	9.2862	2.43546	0	4.82859
O95817	BAG3	0	0	0	4.54373	5.25855	4.1148	3.14169	4.32744	3.56913	5.50526	6.46336	4.21023	6.61853	5.50391	10.5244	4.0591	3.63603	9.65717
P07195	LDHB	10.0553	7.17703	6.23701	3.78644	2.62927	5.1435	5.49796	6.49116	7.13827	7.34035	7.63852	6.31535	6.61853	4.28082	4.95264	9.74184	11.8171	7.24288
P46778	RPL21	17.5968	16.7464	12.474	6.05831	2.62927	6.1722	4.71254	5.04868	5.71061	4.89356	5.28821	6.31535	6.61853	6.11546	6.1908	5.68274	7.27207	4.02382
Q10567	AP1B1	5.02765	4.78469	4.158	4.54373	6.13497	5.1435	8.63965	10.8186	8.56592	11.0105	9.98884	7.71876	6.01685	4.89237	6.80988	7.30638	7.27207	5.63335
O14908	GIPC1	0	0	0	2.27187	0	2.0574	3.92711	5.76992	6.42444	6.11696	5.28821	5.61364	6.01685	6.11546	4.95264	9.74184	7.27207	7.24288
Q68CZ2	TNS3	0	0	0	2.27187	4.38212	2.0574	4.71254	8.65489	7.8521	6.11696	7.05094	10.5256	6.01685	9.17319	6.1908	5.68274	5.45405	8.85241
P28290	ITPRID2	0	0	0	3.02916	3.5057	3.0861	3.92711	3.6062	3.56913	1.22339	0	2.80682	6.01685	9.78474	6.1908	1.62364	0	6.43811
O75083	WDR1	0	0	0	3.78644	3.5057	3.0861	4.71254	5.04868	5.71061	4.28187	4.70063	5.61364	6.01685	3.66928	6.80988	4.87092	4.54504	4.82859
P33981	TTK	0	0	0	6.05831	5.25855	7.20091	7.85423	2.88496	7.8521	4.28187	3.52547	4.21023	6.01685	6.72701	6.80988	0	0	4.02382
Q12965	MYO1E	5.02765	4.78469	6.23701	4.54373	3.5057	5.1435	6.28338	7.21241	8.56592	6.72865	7.05094	5.61364	6.01685	4.89237	6.1908	6.49456	6.36306	9.65717
P46109	CRKL	0	0	4.158	4.54373	4.38212	5.1435	4.71254	4.32744	3.56913	4.28187	4.11305	3.50853	6.01685	4.89237	5.57172	6.49456	7.27207	2.41429
Q9H2U1	DHX36	0	0	0	6.8156	6.13497	8.22961	7.85423	10.0974	12.1351	7.95204	9.40126	9.12217	6.01685	6.11546	5.57172	7.30638	5.45405	13.681
O60610	DIAPH1	0	0	4.158	9.08747	4.38212	4.1148	4.71254	5.04868	9.27975	9.17543	4.70063	5.61364	6.01685	3.66928	6.1908	0	0	2.41429
Q9ULH1	ASAP1	0	0	0	3.78644	3.5057	3.0861	3.92711	5.76992	6.42444	7.34035	7.05094	4.21023	6.01685	3.05773	5.57172	2.43546	1.81802	4.82859
P46459	NSF	0	0	4.158	1.51458	1.75285	2.0574	0	0	0	1.22339	1.17516	4.21023	6.01685	4.28082	6.80988	4.0591	6.36306	4.02382
Q14694	USP10	0	0	0	4.54373	3.5057	5.1435	4.71254	5.76992	4.99679	6.72865	5.87579	6.31535	6.01685	5.50391	6.1908	4.87092	2.72702	4.82859
O95782	AP2A1	0	7.17703	4.158	4.54373	6.13497	4.1148	7.85423	5.76992	7.8521	9.17543	8.2261	9.12217	6.01685	5.50391	4.95264	4.0591	5.45405	4.82859
P14868	DARS1	15.083	19.1388	22.869	10.602	12.2699	11.3157	6.28338	7.21241	7.13827	5.50526	7.05094	5.61364	6.01685	7.33855	4.95264	6.49456	7.27207	3.21906
P41252	IARS1	20.1106	23.9234	20.79	13.6312	15.7756	13.3731	9.42507	10.0974	8.56592	11.6222	8.81368	11.2273	5.41516	12.2309	7.42896	5.68274	11.8171	4.82859
Q01970	PLCB3	0	0	0	2.27187	3.5057	3.0861	9.42507	7.93365	9.99358	8.56374	9.40126	11.929	5.41516	5.50391	6.1908	8.93002	4.54504	4.82859
Q06190	PPP2R3A	0	0	0	7.57289	8.76424	8.22961	6.28338	5.04868	5.71061	5.50526	5.28821	4.91194	5.41516	4.28082	6.1908	6.49456	2.72702	8.04764
P16615	ATP2A2	20.1106	14.3541	22.869	4.54373	3.5057	6.1722	9.42507	7.21241	9.27975	5.50526	6.46336	5.61364	5.41516	5.50391	6.1908	4.87092	5.45405	8.85241
Q99567	NUP88	10.0553	14.3541	8.31601	5.30102	5.25855	6.1722	2.35627	2.88496	2.14148	3.05848	3.52547	6.31535	5.41516	4.28082	4.95264	2.43546	6.36306	2.41429
P08758	ANXA5	0	0	0	4.54373	4.38212	4.1148	6.28338	6.49116	4.99679	11.6222	9.98884	9.12217	5.41516	4.89237	6.80988	3.24728	2.72702	6.43811
Q5JSH3	WDR44	0	0	0	3.02916	4.38212	5.1435	7.0688	11.5398	7.8521	10.3988	11.7516	9.82387	5.41516	5.50391	4.33356	7.30638	3.63603	10.4619
P38919	EIF4A3	0	0	0	1.51458	0	0	0	1.44248	1.42765	1.22339	1.76274	0	5.41516	4.28082	4.95264	4.0591	3.63603	4.02382
Q9C0C9	UBE2O	0	0	0	3.78644	4.38212	5.1435	4.71254	5.04868	5.71061	4.28187	4.11305	4.91194	5.41516	8.56164	6.1908	1.62364	3.63603	7.24288
Q9H9A6	LRRC40	0	0	0	1.51458	1.75285	2.0574	5.49796	4.32744	4.28296	6.72865	5.87579	7.01705	5.41516	3.66928	3.71448	2.43546	3.63603	2.41429
P11413	G6PD	0	0	0	6.8156	4.38212	6.1722	7.85423	10.8186	9.99358	7.95204	9.40126	9.12217	5.41516	6.11546	8.66712	8.93002	10.9081	8.85241
Q96K76	USP47	0	0	0	9.84476	10.5171	12.3444	10.9959	11.5398	11.4212	10.3988	11.164	14.7358	5.41516	6.72701	6.1908	4.0591	2.72702	9.65717
Q6P2E9	EDC4	0	0	0	8.33018	7.88782	6.1722	8.63965	7.93365	9.27975	7.34035	6.46336	7.71876	4.81348	5.50391	5.57172	3.24728	3.63603	4.82859
Q2NKX8	ERCC6L	0	0	0	5.30102	5.25855	6.1722	6.28338	5.76992	9.99358	7.34035	5.28821	6.31535	4.81348	5.50391	6.80988	0	0	3.21906
O00203	AP3B1	17.5968	14.3541	10.395	6.05831	4.38212	3.0861	7.85423	6.49116	5.71061	7.95204	8.2261	7.01705	4.81348	3.05773	3.71448	2.43546	5.45405	3.21906
P42356	PI4KA	0	0	0	5.30102	4.38212	5.1435	11.7813	9.37613	9.27975	11.0105	11.7516	12.6307	4.81348	8.56164	7.42896	4.0591	4.54504	5.63335
O43592	XPOT	10.0553	4.78469	4.158	2.27187	2.62927	4.1148	7.0688	8.65489	7.8521	9.17543	8.81368	8.42046	4.81348	4.89237	4.95264	2.43546	1.81802	2.41429
O94964	SOGA1	0	0	0	12.1166	7.01139	10.287	9.42507	6.49116	10.7074	7.34035	4.11305	4.21023	4.81348	11.6194	10.5244	0	0	1.60953
Q9Y305	ACOT9	20.1106	26.3158	20.79	3.78644	4.38212	5.1435	5.49796	2.88496	2.14148	6.11696	5.28821	5.61364	4.81348	2.44618	1.85724	5.68274	4.54504	3.21906
Q9Y230	RUVBL2	0	0	0	6.05831	5.25855	8.22961	3.92711	4.32744	4.99679	6.72865	4.70063	7.01705	4.81348	5.50391	6.1908	8.93002	9.99909	4.82859
P29966	MARCKS	5.02765	11.9617	6.23701	26.5051	42.0684	22.6314	25.9189	23.0797	19.9872	11.0105	11.7516	22.4546	64.3803	65.4354	52.0027	79.5584	56.3585	62.7716
P80723	BASP1	0	0	4.158	11.3593	11.3935	15.4305	25.9189	31.7346	24.9839	9.17543	6.46336	10.5256	15.0421	12.2309	13.0007	17.86	14.5441	12.0715
P62263	RPS14	32.6797	33.4928	24.948	9.84476	10.5171	10.287	8.63965	8.65489	9.99358	5.50526	5.87579	4.91194	14.4404	12.2309	13.0007	16.2364	19.0892	13.681
P52907	CAPZA1	0	0	0	12.1166	14.0228	14.4018	10.2105	10.8186	9.27975	9.78713	9.98884	8.42046	11.432	9.17319	9.90528	15.4246	15.4531	11.2667
P62244	RPS15A	25.1383	23.9234	20.79	3.78644	4.38212	7.20091	7.85423	7.93365	8.56592	7.34035	7.63852	5.61364	11.432	11.6194	9.90528	8.1182	8.18107	11.2667
Q99439	CNN2	5.02765	4.78469	8.31601	6.05831	6.13497	6.1722	6.28338	10.8186	9.99358	8.56374	8.2261	7.71876	10.8303	9.78474	11.1434	15.4246	12.7261	16.0953
P62070	RRAS2	0	0	0	2.27187	2.62927	3.0861	5.49796	8.65489	5.71061	7.34035	8.81368	9.12217	9.62696	9.78474	9.2862	16.2364	11.8171	10.4619
P26373	RPL13	17.5968	16.7464	10.395	8.33018	7.01139	7.20091	6.28338	3.6062	3.56913	4.89356	5.87579	6.31535	9.62696	9.17319	9.2862	10.5537	12.7261	7.24288
P62829	RPL23	20.1106	14.3541	18.711	7.57289	9.64067	9.25831	10.2105	7.93365	8.56592	5.50526	6.46336	9.12217	9.02527	7.33855	9.2862	7.30638	9.09008	4.82859
P60660	MYL6	20.1106	9.56938	27.027	9.84476	9.64067	11.3157	10.2105	8.65489	8.56592	5.50526	5.87579	7.01705	9.02527	7.9501	6.80988	6.49456	7.27207	9.65717
P62081	RPS7	0	9.56938	8.31601	0	0	0	7.0688	2.88496	3.56913	6.11696	4.11305	4.91194	9.02527	7.9501	6.1908	8.1182	8.18107	4.82859
P47756	CAPZB	0	0	6.23701	6.8156	6.13497	6.1722	5.49796	4.32744	4.99679	8.56374	5.87579	4.91194	9.02527	5.50391	8.04804	10.5537	7.27207	10.4619
P07737	PFN1	0	0	4.158	8.33018	8.76424	12.3444	10.2105	7.93365	9.99358	8.56374	8.81368	9.82387	8.42359	9.78474	8.66712	18.6719	21.8162	12.0715
Q9Y696	CLIC4	0	0	0	3.78644	4.38212	4.1148	5.49796	6.49116	4.99679	4.28187	7.05094	9.12217	7.22022	7.9501	8.04804	7.30638	8.18107	5.63335
Q00653	NFKB2	0	0	0	6.8156	9.64067	10.287	9.42507	8.65489	7.8521	9.78713	8.81368	9.12217	7.22022	7.33855	8.66712	2.43546	0	8.85241
P30041	PRDX6	10.0553	0	0	6.05831	6.13497	8.22961	7.85423	5.76992	5.71061	9.17543	9.40126	11.929	7.22022	7.33855	9.90528	8.1182	12.7261	6.43811
P29401	TKT	0	0	0	3.02916	2.62927	3.0861	5.49796	2.16372	2.14148	5.50526	4.70063	5.61364	6.61853	6.72701	6.1908	10.5537	9.09008	7.24288
Q13347	EIF3I	0	0	0	15.1458	15.7756	10.287	7.0688	5.04868	4.99679	5.50526	3.52547	6.31535	6.61853	5.50391	8.04804	3.24728	3.63603	5.63335
O14983	ATP2A1	15.083	11.9617	8.31601	3.78644	3.5057	3.0861	6.28338	7.93365	4.28296	4.28187	6.46336	6.31535	6.61853	6.72701	4.33356	4.87092	2.72702	6.43811
Q99816	TSG101	0	0	0	4.54373	5.25855	5.1435	8.63965	7.93365	5.71061	6.72865	6.46336	7.01705	6.61853	5.50391	9.2862	9.74184	6.36306	8.04764
Q13492	PICALM	12.5691	16.7464	12.474	6.8156	6.13497	7.20091	8.63965	7.93365	9.27975	9.78713	9.40126	9.12217	6.01685	7.33855	6.80988	6.49456	8.18107	8.04764
P0DMV9	HSPA1B	0	0	4.158	4.54373	6.13497	8.22961	3.92711	7.21241	6.42444	6.11696	5.87579	8.42046	6.01685	7.9501	6.1908	6.49456	3.63603	8.85241
O60884	DNAJA2	0	0	0	1.51458	1.75285	2.0574	3.14169	3.6062	3.56913	3.67017	3.52547	2.80682	6.01685	6.11546	5.57172	3.24728	4.54504	4.02382
Q8N556	AFAP1	0	0	0	3.78644	2.62927	3.0861	7.0688	5.76992	7.8521	6.11696	4.70063	7.01705	6.01685	4.89237	6.1908	4.87092	1.81802	5.63335
Q14141	SEPTIN6	0	0	0	3.02916	3.5057	4.1148	6.28338	4.32744	5.71061	3.67017	4.70063	4.91194	6.01685	6.11546	5.57172	4.0591	1.81802	2.41429
P34932	HSPA4	0	0	0	7.57289	11.3935	11.3157	8.63965	13.7036	7.8521	12.8456	11.7516	12.6307	5.41516	4.89237	8.04804	7.30638	6.36306	10.4619
O43294	TGFB1I1	0	0	0	3.78644	0	0	3.14169	3.6062	3.56913	4.28187	4.11305	4.21023	5.41516	4.89237	4.95264	5.68274	5.45405	5.63335
P62333	PSMC6	0	0	0	3.78644	5.25855	4.1148	5.49796	6.49116	5.71061	6.11696	5.28821	6.31535	5.41516	4.28082	4.95264	2.43546	3.63603	4.82859
Q14669	TRIP12	0	0	0	4.54373	3.5057	3.0861	5.49796	2.16372	2.85531	2.44678	2.93789	2.10512	5.41516	3.66928	4.95264	2.43546	2.72702	4.02382
P49023	PXN	0	0	0	3.02916	1.75285	3.0861	3.14169	5.76992	4.99679	3.67017	4.70063	5.61364	5.41516	7.33855	5.57172	7.30638	9.09008	4.82859
Q92734	TFG	0	0	4.158	11.3593	12.2699	19.5453	4.71254	7.21241	7.13827	3.67017	7.63852	5.61364	5.41516	5.50391	5.57172	7.30638	8.18107	8.85241
P12268	IMPDH2	0	0	0	8.33018	7.01139	8.22961	9.42507	10.8186	10.7074	9.17543	9.40126	11.2273	5.41516	6.11546	8.66712	4.87092	4.54504	10.4619
Q15084	PDIA6	5.02765	4.78469	4.158	3.02916	3.5057	2.0574	2.35627	1.44248	1.42765	3.05848	4.70063	2.80682	5.41516	4.28082	2.47632	3.24728	8.18107	4.02382
Q70E73	RAPH1	0	0	0	3.02916	1.75285	0	4.71254	6.49116	4.99679	4.89356	5.87579	3.50853	5.41516	5.50391	6.80988	1.62364	0	4.82859
P45974	USP5	0	0	0	4.54373	4.38212	7.20091	2.35627	3.6062	5.71061	6.72865	6.46336	7.71876	5.41516	3.66928	3.0954	4.0591	3.63603	8.04764
Q15758	SLC1A5	7.54148	4.78469	4.158	2.27187	1.75285	2.0574	10.2105	12.9823	12.8489	5.50526	7.63852	7.01705	5.41516	4.89237	5.57172	6.49456	4.54504	3.21906
P61221	ABCE1	0	0	0	6.05831	3.5057	5.1435	3.92711	5.04868	3.56913	7.34035	7.05094	4.91194	5.41516	6.11546	6.1908	8.1182	9.09008	6.43811
P48634	PRRC2A	0	0	0	7.57289	12.2699	11.3157	3.92711	5.76992	4.99679	5.50526	2.93789	2.80682	5.41516	4.89237	6.1908	3.24728	1.81802	4.82859
P33992	MCM5	0	0	0	3.02916	0	3.0861	3.92711	5.76992	3.56913	2.44678	2.35031	2.80682	5.41516	3.05773	3.71448	4.87092	9.09008	4.02382
Q9BZF1	OSBPL8	0	0	0	5.30102	3.5057	4.1148	1.57085	0	2.14148	1.83509	1.17516	2.80682	5.41516	3.05773	4.95264	0	0	1.60953
Q96CW1	AP2M1	5.02765	11.9617	6.23701	7.57289	6.13497	4.1148	6.28338	9.37613	5.71061	7.95204	7.63852	8.42046	5.41516	5.50391	4.95264	4.87092	4.54504	4.82859
P54577	YARS1	7.54148	4.78469	0	1.51458	3.5057	0	8.63965	8.65489	7.8521	9.17543	9.40126	9.82387	5.41516	3.05773	3.0954	7.30638	10.9081	2.41429
P43490	NAMPT	0	0	0	3.02916	3.5057	4.1148	4.71254	4.32744	2.14148	7.95204	8.81368	7.71876	4.81348	5.50391	6.80988	9.74184	6.36306	5.63335
O75533	SF3B1	0	4.78469	4.158	8.33018	12.2699	12.3444	4.71254	0	1.42765	1.83509	5.28821	2.80682	4.81348	5.50391	3.71448	4.0591	3.63603	4.82859
Q8IXS6	PALM2AKAP2	0	0	0	2.27187	2.62927	3.0861	3.92711	5.04868	3.56913	4.28187	3.52547	3.50853	4.81348	4.89237	4.95264	4.0591	1.81802	5.63335
P56192	MARS1	15.083	11.9617	14.553	12.8739	8.76424	10.287	7.0688	7.21241	9.99358	7.95204	7.05094	6.31535	4.81348	6.72701	7.42896	4.0591	7.27207	4.82859
Q9UQE7	SMC3	0	0	0	7.57289	5.25855	8.22961	3.14169	1.44248	3.56913	4.89356	4.70063	1.40341	4.81348	7.33855	6.1908	0	0	7.24288
O94973	AP2A2	7.54148	4.78469	10.395	1.51458	0	0	5.49796	3.6062	4.99679	4.28187	7.05094	9.12217	4.81348	5.50391	5.57172	2.43546	1.81802	6.43811
Q9BPX3	NCAPG	0	0	0	4.54373	4.38212	7.20091	7.85423	7.93365	7.8521	4.89356	4.70063	6.31535	4.81348	4.28082	6.1908	4.87092	5.45405	3.21906
P46060	RANGAP1	0	0	0	8.33018	7.01139	6.1722	7.85423	7.21241	10.7074	6.72865	5.87579	8.42046	4.81348	4.89237	3.0954	6.49456	5.45405	6.43811
Q15181	PPA1	0	0	0	4.54373	3.5057	3.0861	3.14169	5.76992	4.28296	6.11696	8.2261	9.82387	4.81348	6.72701	6.1908	8.1182	8.18107	6.43811
P48643	CCT5	0	0	6.23701	3.78644	2.62927	0	6.28338	9.37613	7.8521	6.72865	8.2261	7.01705	4.81348	2.44618	6.1908	6.49456	7.27207	4.02382
P02786	TFRC	0	0	0	4.54373	5.25855	0	8.63965	5.04868	6.42444	8.56374	9.40126	5.61364	4.81348	3.05773	3.71448	8.1182	7.27207	6.43811
P26358	DNMT1	0	0	0	9.08747	7.01139	9.25831	7.85423	5.04868	8.56592	1.83509	1.76274	1.40341	4.81348	4.28082	3.71448	0	0	3.21906
P42166	TMPO	0	0	0	7.57289	8.76424	9.25831	7.85423	4.32744	6.42444	6.11696	4.70063	3.50853	4.81348	3.05773	4.33356	4.0591	4.54504	4.82859
Q93009	USP7	0	0	0	6.8156	7.01139	5.1435	3.92711	2.88496	4.28296	6.72865	5.28821	4.21023	4.81348	3.05773	3.71448	5.68274	3.63603	4.02382
Q9BZF9	UACA	0	0	0	3.02916	7.01139	4.1148	9.42507	5.04868	10.7074	6.11696	5.87579	4.91194	4.81348	6.72701	6.1908	2.43546	1.81802	4.02382
Q8IVF7	FMNL3	0	0	0	0	0	0	3.14169	0	1.42765	1.22339	2.35031	2.10512	4.81348	3.05773	3.71448	1.62364	0	2.41429
P22694	PRKACB	0	4.78469	4.158	3.02916	0	0	4.71254	0	2.14148	2.44678	3.52547	4.91194	4.81348	4.28082	4.33356	4.0591	0	1.60953
Q9Y6Y8	SEC23IP	0	0	0	8.33018	6.13497	7.20091	3.92711	5.76992	6.42444	4.89356	5.28821	4.91194	4.81348	3.66928	4.95264	4.0591	2.72702	4.82859
Q92973	TNPO1	0	0	0	3.78644	4.38212	5.1435	3.92711	2.88496	4.28296	4.28187	4.11305	2.10512	4.81348	3.66928	3.71448	2.43546	3.63603	0
Q86X55	CARM1	0	0	0	6.8156	7.01139	3.0861	7.0688	5.76992	5.71061	4.28187	4.70063	6.31535	4.81348	5.50391	5.57172	4.0591	4.54504	8.04764
Q7Z3T8	ZFYVE16	0	0	0	6.05831	4.38212	5.1435	6.28338	8.65489	9.99358	6.72865	4.11305	7.01705	4.21179	4.28082	3.0954	2.43546	0	2.41429
Q9Y4K1	CRYBG1	0	0	0	5.30102	6.13497	6.1722	9.42507	6.49116	4.99679	6.72865	7.05094	5.61364	4.21179	5.50391	4.95264	0	0	3.21906
Q12888	TP53BP1	0	0	0	15.1458	20.1578	19.5453	1.57085	1.44248	2.14148	1.22339	0	0	4.21179	6.11546	4.33356	0	0	0
Q06124	PTPN11	0	0	0	3.02916	3.5057	5.1435	5.49796	5.04868	4.28296	4.89356	5.87579	7.71876	4.21179	5.50391	6.80988	8.93002	4.54504	9.65717
O43847	NRDC	0	0	0	3.78644	1.75285	0	7.0688	10.0974	5.71061	5.50526	5.28821	6.31535	4.21179	6.11546	3.71448	4.87092	1.81802	6.43811
P49790	NUP153	0	0	0	9.08747	9.64067	10.287	3.14169	2.16372	2.85531	2.44678	1.76274	2.80682	4.21179	4.89237	4.95264	3.24728	2.72702	5.63335
Q9UIG0	BAZ1B	0	0	0	6.8156	7.01139	5.1435	2.35627	0	2.14148	0	0	0	4.21179	0	1.85724	1.62364	0	1.60953
P19525	EIF2AK2	10.0553	9.56938	14.553	6.05831	7.88782	6.1722	7.85423	6.49116	8.56592	7.34035	6.46336	8.42046	4.21179	3.66928	3.0954	5.68274	6.36306	4.02382
O15357	INPPL1	0	0	0	4.54373	2.62927	3.0861	8.63965	9.37613	7.8521	11.6222	9.98884	10.5256	4.21179	4.89237	4.95264	4.0591	0	6.43811
O15294	OGT	0	0	0	7.57289	8.76424	10.287	4.71254	3.6062	3.56913	3.05848	4.11305	2.10512	4.21179	3.66928	5.57172	0	0	1.60953
P78344	EIF4G2	0	0	0	2.27187	1.75285	0	3.92711	3.6062	4.28296	4.28187	7.63852	3.50853	4.21179	4.28082	3.0954	1.62364	2.72702	4.02382
P08240	SRPRA	5.02765	0	0	2.27187	2.62927	5.1435	2.35627	2.16372	1.42765	5.50526	2.93789	4.91194	4.21179	3.05773	3.71448	3.24728	6.36306	3.21906
P62917	RPL8	15.083	9.56938	8.31601	12.1166	9.64067	7.20091	7.0688	7.21241	6.42444	5.50526	4.70063	4.21023	8.42359	9.17319	9.2862	8.93002	12.7261	6.43811
O43175	PHGDH	7.54148	7.17703	8.31601	4.54373	5.25855	5.1435	7.85423	7.21241	7.13827	9.17543	8.2261	9.12217	7.22022	7.33855	7.42896	5.68274	6.36306	8.85241
P45880	VDAC2	15.083	14.3541	14.553	7.57289	7.88782	9.25831	6.28338	4.32744	5.71061	3.67017	3.52547	4.21023	7.22022	6.72701	5.57172	11.3655	11.8171	8.04764
P21980	TGM2	7.54148	19.1388	10.395	6.8156	8.76424	10.287	8.63965	5.76992	7.13827	6.72865	7.63852	6.31535	7.22022	6.72701	8.04804	6.49456	7.27207	6.43811
Q9NQC3	RTN4	10.0553	19.1388	12.474	6.8156	7.88782	9.25831	5.49796	8.65489	6.42444	4.28187	4.70063	4.91194	6.61853	7.33855	6.1908	8.93002	9.09008	8.04764
P62847	RPS24	25.1383	26.3158	24.948	5.30102	7.88782	5.1435	6.28338	5.76992	6.42444	4.89356	4.70063	4.91194	6.61853	9.17319	6.80988	3.24728	7.27207	8.85241
P40222	TXLNA	0	0	0	4.54373	4.38212	8.22961	3.92711	5.04868	6.42444	3.05848	2.93789	3.50853	6.61853	4.89237	6.1908	3.24728	2.72702	4.82859
O00161	SNAP23	0	0	0	1.51458	0	0	2.35627	5.04868	4.99679	2.44678	5.28821	2.10512	6.61853	4.28082	6.1908	9.74184	8.18107	6.43811
P63092	GNAS	5.02765	0	6.23701	2.27187	2.62927	4.1148	5.49796	5.76992	4.99679	4.28187	4.11305	4.91194	6.61853	6.72701	4.33356	4.87092	6.36306	4.02382
P46777	RPL5	10.0553	14.3541	6.23701	4.54373	7.88782	6.1722	4.71254	6.49116	8.56592	4.28187	4.11305	3.50853	6.61853	6.11546	8.04804	3.24728	6.36306	4.82859
Q9UPN7	PPP6R1	0	0	0	3.78644	7.01139	6.1722	2.35627	0	3.56913	1.83509	4.70063	3.50853	6.01685	3.66928	4.95264	0	0	4.02382
P20042	EIF2S2	0	0	0	0	0	2.0574	0	0	0	4.89356	2.35031	4.21023	6.01685	6.11546	5.57172	4.87092	6.36306	6.43811
P17302	GJA1	0	0	0	4.54373	4.38212	5.1435	3.14169	4.32744	5.71061	5.50526	4.70063	6.31535	6.01685	5.50391	4.95264	5.68274	7.27207	8.04764
P43243	MATR3	0	0	0	6.8156	7.88782	9.25831	3.92711	2.88496	4.28296	2.44678	2.93789	3.50853	6.01685	3.66928	4.33356	4.87092	2.72702	5.63335
P35611	ADD1	0	0	0	4.54373	3.5057	3.0861	4.71254	7.93365	6.42444	7.34035	5.87579	4.91194	6.01685	5.50391	6.1908	5.68274	6.36306	10.4619
P11802	CDK4	7.54148	11.9617	12.474	2.27187	2.62927	6.1722	7.85423	10.0974	7.13827	7.95204	7.63852	6.31535	6.01685	6.72701	7.42896	5.68274	5.45405	6.43811
O00151	PDLIM1	0	0	0	3.78644	4.38212	4.1148	3.92711	5.76992	2.85531	7.34035	4.70063	4.91194	6.01685	5.50391	7.42896	8.93002	9.09008	8.85241
O95816	BAG2	0	0	0	0	3.5057	3.0861	4.71254	2.16372	2.85531	1.83509	2.35031	2.10512	6.01685	6.11546	3.71448	0	0	0
Q9Y450	HBS1L	0	0	0	3.78644	2.62927	5.1435	1.57085	2.88496	3.56913	3.67017	4.11305	5.61364	5.41516	4.89237	4.95264	4.87092	4.54504	5.63335
Q14498	RBM39	37.7074	31.1005	31.185	4.54373	3.5057	5.1435	5.49796	4.32744	5.71061	6.11696	7.63852	7.01705	5.41516	4.28082	3.71448	7.30638	11.8171	4.82859
Q9Y5S1	TRPV2	0	0	0	5.30102	7.01139	6.1722	5.49796	3.6062	4.28296	3.67017	2.35031	4.91194	5.41516	4.28082	3.0954	4.0591	5.45405	4.82859
O00148	DDX39A	5.02765	4.78469	4.158	5.30102	4.38212	4.1148	7.0688	5.76992	4.28296	6.11696	5.87579	7.01705	5.41516	6.72701	9.2862	8.1182	9.99909	6.43811
Q9Y613	FHOD1	0	0	0	4.54373	4.38212	5.1435	3.92711	5.76992	5.71061	7.34035	4.70063	5.61364	5.41516	2.44618	4.33356	1.62364	1.81802	2.41429
O00303	EIF3F	0	0	0	3.78644	5.25855	5.1435	5.49796	4.32744	4.28296	3.67017	2.93789	4.21023	5.41516	5.50391	6.1908	2.43546	2.72702	2.41429
O00425	IGF2BP3	20.1106	19.1388	14.553	4.54373	5.25855	4.1148	5.49796	4.32744	2.85531	7.34035	8.2261	10.5256	5.41516	5.50391	6.1908	9.74184	12.7261	6.43811
O00154	ACOT7	0	0	0	3.02916	2.62927	2.0574	4.71254	2.88496	2.85531	4.28187	6.46336	2.80682	5.41516	5.50391	4.95264	4.87092	5.45405	3.21906
P26599	PTBP1	0	0	0	6.05831	3.5057	5.1435	4.71254	5.04868	6.42444	4.28187	7.05094	9.12217	4.81348	4.89237	5.57172	8.93002	11.8171	10.4619
P08754	GNAI3	0	0	0	3.02916	1.75285	2.0574	7.0688	7.21241	7.13827	6.72865	6.46336	6.31535	4.81348	4.89237	5.57172	9.74184	6.36306	5.63335
Q9Y4B5	MTCL1	0	0	0	10.602	15.7756	12.3444	6.28338	3.6062	5.71061	4.89356	4.70063	6.31535	4.81348	9.78474	6.80988	0	0	4.02382
Q9BZE4	GTPBP4	0	9.56938	8.31601	3.78644	0	2.0574	1.57085	0	1.42765	1.22339	1.17516	2.80682	4.81348	4.28082	3.71448	1.62364	3.63603	2.41429
Q92783	STAM	0	0	0	3.02916	2.62927	5.1435	4.71254	3.6062	4.99679	4.89356	5.87579	5.61364	4.81348	3.66928	5.57172	4.0591	3.63603	9.65717
O43166	SIPA1L1	0	0	0	2.27187	0	0	4.71254	3.6062	6.42444	5.50526	7.05094	6.31535	4.81348	4.28082	5.57172	0	0	4.02382
Q9Y4E8	USP15	0	0	0	4.54373	6.13497	6.1722	6.28338	10.8186	4.99679	7.95204	8.2261	9.82387	4.81348	4.28082	4.33356	2.43546	0	7.24288
Q15642	TRIP10	0	0	0	2.27187	2.62927	0	3.14169	5.04868	3.56913	4.28187	5.28821	5.61364	4.81348	4.89237	3.71448	4.0591	1.81802	4.82859
Q13561	DCTN2	0	0	0	6.05831	7.88782	7.20091	8.63965	8.65489	7.13827	6.11696	5.87579	4.21023	4.81348	5.50391	5.57172	6.49456	6.36306	9.65717
Q9Y224	RTRAF	0	0	0	5.30102	3.5057	3.0861	5.49796	5.04868	4.28296	6.11696	5.28821	6.31535	4.81348	6.72701	2.47632	4.87092	4.54504	8.04764
Q9NVA2	SEPTIN11	0	0	0	1.51458	4.38212	3.0861	3.14169	5.04868	2.85531	3.05848	4.11305	2.80682	4.81348	3.05773	4.33356	2.43546	1.81802	4.02382
O14744	PRMT5	0	0	0	7.57289	7.88782	7.20091	6.28338	6.49116	4.28296	4.28187	4.70063	5.61364	4.81348	6.72701	4.95264	1.62364	1.81802	2.41429
P29590	PML	0	0	0	7.57289	8.76424	11.3157	3.92711	2.16372	2.14148	3.05848	2.93789	2.80682	4.81348	5.50391	4.33356	2.43546	0	5.63335
O94925	GLS	7.54148	9.56938	4.158	2.27187	1.75285	0	1.57085	1.44248	2.85531	3.05848	3.52547	4.21023	4.81348	4.28082	3.0954	4.87092	8.18107	4.82859
O95433	AHSA1	10.0553	11.9617	14.553	2.27187	2.62927	2.0574	6.28338	2.88496	2.85531	3.05848	3.52547	4.21023	4.81348	2.44618	2.47632	4.87092	4.54504	2.41429
Q9H2D6	TRIOBP	0	0	0	5.30102	7.88782	5.1435	7.85423	7.21241	7.13827	6.72865	8.81368	7.71876	4.81348	5.50391	5.57172	0	0	4.02382
Q8N3R9	PALS1	0	0	0	0	0	0	7.0688	4.32744	7.13827	2.44678	2.93789	4.21023	4.81348	4.28082	4.95264	4.87092	0	8.04764
Q08J23	NSUN2	0	0	0	4.54373	7.88782	6.1722	2.35627	4.32744	7.8521	6.11696	5.28821	2.80682	4.81348	3.05773	3.0954	3.24728	5.45405	0
P26641	EEF1G	5.02765	4.78469	6.23701	6.05831	7.01139	9.25831	7.0688	7.21241	5.71061	5.50526	6.46336	7.71876	4.81348	4.89237	6.1908	5.68274	5.45405	3.21906
P35232	PHB1	15.083	7.17703	14.553	5.30102	6.13497	7.20091	3.92711	5.76992	2.85531	6.72865	4.11305	5.61364	4.81348	7.33855	5.57172	7.30638	9.99909	8.85241
P55011	SLC12A2	0	0	0	0	0	0	4.71254	4.32744	4.28296	4.89356	3.52547	2.80682	4.81348	2.44618	2.47632	0	0	1.60953
Q8N4C8	MINK1	0	4.78469	0	2.27187	0	0	7.85423	10.0974	7.8521	6.72865	6.46336	7.01705	4.81348	7.9501	5.57172	4.87092	1.81802	8.04764
Q8TC07	TBC1D15	0	0	0	3.02916	3.5057	4.1148	7.85423	5.76992	7.13827	7.95204	8.2261	7.71876	4.81348	5.50391	4.33356	0	2.72702	4.82859
P23526	AHCY	0	0	0	4.54373	4.38212	4.1148	7.0688	5.76992	7.13827	7.34035	6.46336	4.91194	4.81348	4.28082	3.0954	7.30638	3.63603	4.02382
O15056	SYNJ2	0	0	0	4.54373	7.01139	7.20091	3.92711	3.6062	1.42765	4.89356	6.46336	5.61364	4.81348	4.89237	4.95264	1.62364	2.72702	2.41429
Q13177	PAK2	0	0	0	0	0	0	0	2.16372	2.85531	4.28187	7.05094	3.50853	4.81348	1.83464	1.85724	2.43546	3.63603	2.41429
P09619	PDGFRB	0	0	0	0	1.75285	0	3.14169	7.93365	5.71061	8.56374	9.40126	10.5256	4.81348	6.72701	5.57172	8.93002	6.36306	10.4619
P30153	PPP2R1A	0	0	0	3.02916	3.5057	3.0861	7.85423	5.76992	5.71061	5.50526	5.87579	5.61364	4.81348	3.66928	4.33356	4.0591	4.54504	7.24288
O00429	DNM1L	0	0	4.158	4.54373	7.88782	7.20091	7.85423	7.21241	6.42444	6.72865	8.81368	9.12217	4.21179	3.66928	4.95264	3.24728	1.81802	3.21906
P07954	FH	0	0	0	1.51458	1.75285	0	0	1.44248	1.42765	2.44678	3.52547	2.80682	4.21179	3.66928	4.33356	5.68274	8.18107	4.02382
Q9UBT2	UBA2	0	0	0	1.51458	1.75285	0	0	0	0	1.83509	1.17516	0	4.21179	2.44618	4.33356	4.0591	5.45405	2.41429
Q8NDI1	EHBP1	0	0	0	2.27187	1.75285	3.0861	3.14169	4.32744	4.28296	6.11696	5.87579	7.71876	4.21179	1.83464	4.95264	4.0591	1.81802	6.43811
P08865	RPSA	0	0	0	3.02916	3.5057	4.1148	3.14169	2.88496	3.56913	2.44678	4.70063	4.91194	4.21179	3.05773	3.0954	4.87092	5.45405	2.41429
Q9UL46	PSME2	0	0	0	3.02916	2.62927	6.1722	4.71254	6.49116	3.56913	4.28187	5.28821	4.21023	4.21179	3.66928	4.33356	7.30638	4.54504	4.02382
O60502	OGA	0	0	0	3.78644	0	3.0861	3.92711	5.04868	5.71061	4.28187	3.52547	4.21023	4.21179	4.28082	4.95264	1.62364	1.81802	4.02382
Q0ZGT2	NEXN	0	0	0	3.02916	2.62927	0	4.71254	8.65489	11.4212	7.95204	9.98884	8.42046	4.21179	2.44618	3.71448	4.87092	2.72702	4.82859
Q9UGP8	SEC63	7.54148	7.17703	0	4.54373	2.62927	5.1435	4.71254	5.04868	2.14148	3.67017	5.87579	5.61364	4.21179	0	4.33356	3.24728	4.54504	0
P54578	USP14	0	0	0	5.30102	6.13497	6.1722	7.0688	8.65489	9.27975	7.34035	7.05094	7.71876	4.21179	5.50391	5.57172	4.87092	4.54504	7.24288
Q9HB71	CACYBP	0	0	0	3.02916	4.38212	5.1435	6.28338	7.21241	5.71061	5.50526	5.28821	2.80682	4.21179	3.66928	3.0954	5.68274	5.45405	3.21906
P55039	DRG2	0	0	0	1.51458	0	0	1.57085	0	0	2.44678	2.93789	3.50853	4.21179	3.05773	3.71448	2.43546	1.81802	3.21906
Q92615	LARP4B	0	0	0	2.27187	1.75285	3.0861	3.14169	4.32744	4.28296	4.28187	2.93789	4.21023	4.21179	2.44618	4.33356	0	0	4.02382
Q15717	ELAVL1	7.54148	9.56938	12.474	6.05831	4.38212	3.0861	5.49796	2.88496	3.56913	3.67017	5.28821	4.91194	4.21179	1.83464	3.0954	7.30638	6.36306	7.24288
Q04206	RELA	0	0	0	2.27187	3.5057	3.0861	3.14169	3.6062	2.85531	3.05848	2.93789	3.50853	4.21179	4.28082	4.95264	3.24728	3.63603	3.21906
Q5H9R7	PPP6R3	0	0	0	4.54373	6.13497	8.22961	9.42507	6.49116	7.13827	6.11696	4.70063	6.31535	4.21179	3.66928	5.57172	2.43546	0	1.60953
P17252	PRKCA	0	0	0	3.02916	3.5057	5.1435	5.49796	4.32744	3.56913	3.67017	5.28821	5.61364	4.21179	4.28082	4.95264	4.0591	3.63603	4.02382
P22059	OSBP	0	0	0	2.27187	3.5057	0	2.35627	2.88496	3.56913	3.05848	2.93789	2.10512	4.21179	3.66928	4.95264	4.87092	0	4.02382
Q14566	MCM6	5.02765	4.78469	6.23701	2.27187	4.38212	5.1435	6.28338	3.6062	4.99679	3.05848	5.87579	4.21023	4.21179	3.66928	4.95264	4.87092	1.81802	2.41429
Q9UEY8	ADD3	0	0	0	2.27187	2.62927	2.0574	4.71254	7.21241	3.56913	4.28187	4.11305	5.61364	4.21179	1.83464	4.33356	2.43546	3.63603	4.02382
P53350	PLK1	0	0	0	3.02916	2.62927	3.0861	3.14169	1.44248	2.14148	0	0	0	4.21179	4.89237	3.71448	0	0	0
Q9HD20	ATP13A1	0	0	0	2.27187	2.62927	2.0574	0	3.6062	4.28296	3.05848	4.11305	3.50853	4.21179	1.83464	4.33356	5.68274	4.54504	3.21906
Q9BTE3	MCMBP	0	0	0	4.54373	3.5057	4.1148	7.85423	7.21241	7.13827	6.11696	4.11305	6.31535	3.61011	4.89237	3.0954	4.87092	0	4.02382
Q13045	FLII	0	0	0	5.30102	7.01139	5.1435	5.49796	3.6062	4.28296	6.72865	4.70063	5.61364	3.61011	3.66928	4.33356	2.43546	3.63603	4.82859
Q96P70	IPO9	0	0	6.23701	3.02916	1.75285	2.0574	3.14169	4.32744	3.56913	5.50526	4.11305	4.91194	3.61011	3.66928	3.71448	4.0591	2.72702	2.41429
Q15029	EFTUD2	0	0	0	4.54373	7.01139	7.20091	3.92711	2.88496	2.14148	3.05848	3.52547	2.10512	3.61011	3.66928	3.71448	4.87092	4.54504	3.21906
P17655	CAPN2	0	0	0	6.8156	7.88782	5.1435	8.63965	8.65489	7.13827	6.72865	8.2261	7.71876	3.61011	3.66928	5.57172	8.93002	6.36306	6.43811
Q96AC1	FERMT2	0	0	0	3.02916	0	0	8.63965	6.49116	9.27975	9.17543	10.5764	11.2273	3.61011	5.50391	4.33356	8.93002	6.36306	8.04764
Q9NQX3	GPHN	0	0	0	1.51458	0	0	0	0	2.14148	0	1.17516	0	3.61011	4.28082	4.33356	1.62364	0	2.41429
Q8N1F7	NUP93	10.0553	7.17703	10.395	4.54373	3.5057	4.1148	5.49796	5.76992	4.99679	4.89356	4.11305	7.01705	3.61011	3.66928	4.33356	4.87092	4.54504	4.02382
Q6ZSR9		0	0	0	3.78644	4.38212	3.0861	3.92711	5.04868	2.85531	4.89356	5.28821	3.50853	3.61011	4.28082	5.57172	1.62364	3.63603	7.24288
Q9HAV4	XPO5	0	0	0	2.27187	3.5057	2.0574	2.35627	0	2.14148	1.83509	1.76274	2.10512	3.61011	2.44618	2.47632	0	0	2.41429
P46934	NEDD4	0	0	0	1.51458	0	0	3.14169	3.6062	2.85531	3.05848	2.35031	2.80682	3.61011	3.05773	3.0954	3.24728	1.81802	0
Q15334	LLGL1	0	0	0	1.51458	0	2.0574	5.49796	5.76992	4.99679	5.50526	4.70063	5.61364	3.61011	3.66928	3.71448	3.24728	3.63603	4.02382
P39748	FEN1	0	0	0	0	0	2.0574	0	2.16372	2.14148	1.83509	1.17516	2.10512	3.61011	1.83464	1.85724	3.24728	4.54504	4.02382
Q8N3C0	ASCC3	0	0	0	7.57289	7.01139	5.1435	5.49796	3.6062	5.71061	4.89356	5.28821	9.12217	3.61011	6.72701	3.0954	0	1.81802	4.02382
Q5SW79	CEP170	0	0	0	4.54373	6.13497	10.287	6.28338	7.93365	9.27975	3.67017	2.93789	5.61364	3.61011	7.9501	7.42896	0	0	4.82859
Q92692	NECTIN2	0	0	0	0	0	0	2.35627	4.32744	2.14148	4.28187	4.11305	4.91194	3.61011	3.66928	3.0954	5.68274	4.54504	2.41429
P22681	CBL	0	0	0	3.02916	2.62927	2.0574	6.28338	6.49116	6.42444	4.89356	5.28821	3.50853	3.61011	1.83464	3.71448	2.43546	0	5.63335
P67809	YBX1	10.0553	9.56938	0	85.5736	92.0245	30.861	2.35627	3.6062	5.71061	3.67017	2.93789	13.3324	34.296	37.9159	35.9066	53.5801	79.9927	55.5287
P62826	RAN	17.5968	11.9617	14.553	9.08747	7.88782	10.287	7.0688	6.49116	6.42444	4.28187	3.52547	3.50853	13.2371	14.0656	15.477	6.49456	8.18107	9.65717
P62987	UBA52	7.54148	4.78469	10.395	6.05831	9.64067	9.25831	6.28338	6.49116	9.99358	3.05848	3.52547	3.50853	12.6354	11.6194	13.0007	6.49456	7.27207	5.63335
P07355	ANXA2	10.0553	9.56938	10.395	6.8156	7.88782	8.22961	9.42507	9.37613	8.56592	7.95204	9.40126	9.82387	12.0337	10.3963	10.5244	19.4837	14.5441	19.3143
P07437	TUBB	27.6521	26.3158	27.027	6.8156	3.5057	7.20091	8.63965	10.0974	8.56592	9.17543	7.63852	9.12217	11.432	11.6194	8.04804	12.1773	12.7261	8.85241
P62753	RPS6	22.6244	23.9234	20.79	9.08747	9.64067	11.3157	7.0688	7.21241	7.8521	7.34035	5.28821	5.61364	11.432	10.3963	11.1434	11.3655	9.09008	9.65717
P62241	RPS8	32.6797	31.1005	24.948	11.3593	13.1464	16.4592	9.42507	7.21241	7.8521	6.72865	5.28821	5.61364	9.62696	7.9501	8.66712	9.74184	14.5441	8.85241
Q07020	RPL18	15.083	16.7464	12.474	7.57289	7.88782	7.20091	6.28338	3.6062	4.28296	4.89356	4.11305	4.91194	9.02527	8.56164	7.42896	6.49456	8.18107	7.24288
P67936	TPM4	0	0	4.158	2.27187	5.25855	7.20091	3.92711	2.88496	4.28296	2.44678	4.11305	3.50853	8.42359	8.56164	6.80988	8.1182	7.27207	6.43811
P27348	YWHAQ	0	0	0	6.05831	9.64067	8.22961	4.71254	5.04868	4.99679	4.28187	4.70063	4.21023	7.8219	7.33855	7.42896	12.1773	11.8171	11.2667
Q9Y383	LUC7L2	55.3042	50.2392	51.9751	9.08747	9.64067	10.287	7.0688	8.65489	8.56592	8.56374	8.2261	11.929	7.8219	6.72701	7.42896	10.5537	21.8162	5.63335
Q13509	TUBB3	10.0553	9.56938	10.395	2.27187	2.62927	2.0574	3.92711	4.32744	4.99679	4.28187	3.52547	3.50853	7.8219	9.17319	11.1434	5.68274	5.45405	6.43811
P62913	RPL11	10.0553	9.56938	8.31601	2.27187	2.62927	3.0861	3.14169	5.76992	2.85531	3.67017	1.76274	2.10512	7.8219	8.56164	6.80988	4.87092	6.36306	7.24288
P63104	YWHAZ	0	0	6.23701	8.33018	6.13497	6.1722	7.0688	9.37613	7.13827	7.34035	6.46336	6.31535	7.22022	6.72701	6.80988	12.1773	10.9081	11.2667
Q9UNF1	MAGED2	5.02765	9.56938	6.23701	11.3593	7.88782	11.3157	6.28338	5.04868	6.42444	6.11696	5.87579	9.12217	7.22022	7.9501	6.80988	8.1182	9.99909	6.43811
P35637	FUS	0	0	0	23.476	17.5285	19.5453	4.71254	4.32744	3.56913	2.44678	2.35031	3.50853	7.22022	4.89237	5.57172	14.6128	15.4531	9.65717
P61619	SEC61A1	10.0553	9.56938	6.23701	3.02916	4.38212	7.20091	3.92711	5.04868	2.85531	3.67017	4.11305	4.91194	7.22022	6.11546	4.33356	4.87092	11.8171	0
P23528	CFL1	7.54148	9.56938	6.23701	4.54373	5.25855	6.1722	9.42507	10.0974	8.56592	8.56374	10.5764	11.2273	6.61853	7.9501	9.90528	9.74184	12.7261	16.9
P62820	RAB1A	7.54148	11.9617	6.23701	4.54373	5.25855	5.1435	9.42507	8.65489	8.56592	9.17543	8.2261	10.5256	6.61853	9.17319	8.04804	9.74184	10.9081	6.43811
P84098	RPL19	5.02765	0	0	2.27187	1.75285	0	1.57085	2.16372	2.14148	1.83509	2.93789	2.80682	6.61853	6.11546	5.57172	7.30638	9.99909	4.02382
Q8TCT9	HM13	0	4.78469	0	4.54373	3.5057	4.1148	0	0	2.14148	2.44678	1.76274	2.80682	6.61853	4.89237	5.57172	4.87092	4.54504	4.82859
P52597	HNRNPF	12.5691	9.56938	8.31601	12.1166	13.1464	10.287	7.0688	7.21241	6.42444	6.72865	5.87579	5.61364	6.01685	8.56164	4.95264	8.93002	13.6351	8.85241
Q9ULV4	CORO1C	0	0	0	3.78644	3.5057	4.1148	11.7813	25.9647	18.5595	9.17543	6.46336	5.61364	6.01685	7.9501	6.80988	5.68274	5.45405	9.65717
P19105	MYL12A	7.54148	0	8.31601	10.602	10.5171	9.25831	5.49796	5.04868	5.71061	7.34035	7.05094	4.91194	6.01685	3.66928	4.95264	9.74184	9.99909	9.65717
P61158	ACTR3	0	0	0	3.02916	2.62927	2.0574	3.14169	3.6062	4.28296	3.67017	4.11305	3.50853	6.01685	4.89237	4.33356	2.43546	1.81802	5.63335
P32119	PRDX2	0	4.78469	4.158	8.33018	6.13497	7.20091	7.0688	6.49116	6.42444	6.11696	7.05094	6.31535	6.01685	4.89237	4.95264	8.1182	4.54504	4.82859
P26196	DDX6	0	0	0	8.33018	5.25855	7.20091	3.14169	2.88496	2.85531	4.28187	4.11305	4.91194	5.41516	3.66928	4.95264	7.30638	7.27207	4.82859
P08238	HSP90AB1	10.0553	9.56938	6.23701	5.30102	5.25855	6.1722	3.92711	5.76992	6.42444	7.34035	7.05094	6.31535	5.41516	5.50391	4.33356	6.49456	12.7261	7.24288
O00299	CLIC1	0	0	0	3.02916	1.75285	3.0861	3.92711	3.6062	2.85531	3.67017	2.35031	4.21023	5.41516	2.44618	4.95264	6.49456	6.36306	4.02382
O14617	AP3D1	20.1106	26.3158	18.711	10.602	13.1464	10.287	7.0688	5.76992	7.8521	10.3988	7.05094	9.82387	5.41516	5.50391	6.1908	7.30638	4.54504	1.60953
P24534	EEF1B2	0	0	0	5.30102	5.25855	5.1435	3.92711	3.6062	3.56913	2.44678	2.93789	3.50853	4.81348	3.05773	3.71448	4.0591	2.72702	3.21906
Q9Y5M8	SRPRB	7.54148	4.78469	4.158	5.30102	4.38212	3.0861	3.92711	3.6062	3.56913	3.67017	2.93789	4.21023	4.81348	3.66928	6.80988	4.0591	6.36306	4.82859
Q8TEW0	PARD3	0	0	0	0	1.75285	2.0574	7.85423	8.65489	8.56592	8.56374	5.87579	7.71876	4.81348	4.89237	4.95264	3.24728	0	5.63335
Q7Z434	MAVS	0	0	0	6.8156	5.25855	6.1722	4.71254	4.32744	6.42444	4.28187	4.11305	4.91194	4.81348	4.89237	4.33356	4.0591	5.45405	8.85241
Q9UHB9	SRP68	0	0	0	0	0	0	2.35627	3.6062	1.42765	2.44678	4.11305	1.40341	4.81348	3.66928	4.33356	1.62364	1.81802	3.21906
Q71RC2	LARP4	0	0	0	4.54373	3.5057	4.1148	4.71254	5.04868	5.71061	3.67017	2.35031	3.50853	4.81348	4.28082	5.57172	3.24728	4.54504	4.82859
Q01518	CAP1	0	0	0	2.27187	4.38212	3.0861	1.57085	4.32744	3.56913	3.67017	4.11305	4.21023	4.81348	3.05773	4.33356	4.87092	4.54504	6.43811
Q5VUB5	FAM171A1	0	0	0	0	2.62927	3.0861	6.28338	5.76992	8.56592	4.28187	4.11305	3.50853	4.81348	1.83464	3.0954	4.0591	1.81802	3.21906
Q8NHW5	RPLP0P6	10.0553	9.56938	6.23701	3.02916	2.62927	3.0861	2.35627	2.16372	3.56913	3.67017	3.52547	2.80682	4.81348	2.44618	4.33356	3.24728	8.18107	4.82859
P28370	SMARCA1	0	0	0	5.30102	3.5057	0	0	0	0	0	0	0	4.81348	2.44618	2.47632	0	0	1.60953
P30626	SRI	0	0	0	2.27187	1.75285	3.0861	7.85423	7.21241	4.99679	6.11696	6.46336	4.91194	4.81348	5.50391	6.1908	17.0482	22.7252	7.24288
P04632	CAPNS1	0	0	0	5.30102	3.5057	4.1148	4.71254	5.04868	4.28296	3.05848	4.11305	2.80682	4.21179	2.44618	4.95264	5.68274	5.45405	6.43811
Q9NVD7	PARVA	7.54148	4.78469	8.31601	2.27187	1.75285	3.0861	2.35627	3.6062	2.85531	3.05848	2.93789	3.50853	4.21179	3.05773	2.47632	3.24728	2.72702	4.82859
O95232	LUC7L3	17.5968	11.9617	14.553	2.27187	2.62927	3.0861	3.14169	2.88496	2.85531	3.67017	3.52547	4.21023	4.21179	4.28082	3.0954	4.0591	8.18107	5.63335
Q13283	G3BP1	0	0	0	6.8156	6.13497	8.22961	6.28338	5.04868	3.56913	3.05848	3.52547	4.21023	4.21179	2.44618	3.0954	4.87092	7.27207	5.63335
Q8WTT2	NOC3L	5.02765	0	4.158	0	0	0	2.35627	0	0	1.22339	1.76274	1.40341	4.21179	3.66928	2.47632	3.24728	1.81802	1.60953
Q15003	NCAPH	0	0	0	4.54373	7.88782	7.20091	6.28338	5.04868	7.13827	4.28187	4.70063	4.91194	4.21179	2.44618	4.95264	4.87092	4.54504	1.60953
O75396	SEC22B	5.02765	7.17703	4.158	6.8156	5.25855	4.1148	2.35627	3.6062	3.56913	3.67017	4.70063	3.50853	4.21179	3.05773	2.47632	5.68274	1.81802	4.82859
P47755	CAPZA2	10.0553	9.56938	10.395	6.05831	7.01139	6.1722	7.0688	4.32744	4.99679	4.28187	7.05094	8.42046	4.21179	4.28082	4.95264	6.49456	5.45405	5.63335
Q07021	C1QBP	5.02765	4.78469	6.23701	1.51458	3.5057	3.0861	2.35627	2.16372	2.14148	2.44678	3.52547	2.80682	4.21179	2.44618	4.33356	5.68274	6.36306	5.63335
P42167	TMPO	0	0	0	3.78644	4.38212	5.1435	6.28338	3.6062	2.85531	4.28187	4.11305	2.10512	4.21179	4.89237	3.71448	4.87092	6.36306	5.63335
Q9H3S7	PTPN23	0	0	0	4.54373	4.38212	5.1435	4.71254	2.88496	4.28296	5.50526	4.11305	4.21023	4.21179	4.28082	2.47632	2.43546	1.81802	4.02382
Q9BVP2	GNL3	30.1659	21.5311	29.106	5.30102	5.25855	2.0574	4.71254	3.6062	4.28296	3.05848	2.35031	2.80682	4.21179	2.44618	3.71448	2.43546	3.63603	2.41429
P26640	VARS1	0	0	0	6.8156	6.13497	6.1722	5.49796	5.76992	3.56913	6.11696	7.05094	6.31535	4.21179	6.11546	2.47632	5.68274	4.54504	3.21906
Q6IBS0	TWF2	0	4.78469	4.158	2.27187	1.75285	3.0861	2.35627	2.16372	1.42765	4.28187	2.35031	2.10512	4.21179	3.05773	1.85724	2.43546	1.81802	0
O00571	DDX3X	0	4.78469	4.158	3.78644	0	4.1148	3.14169	4.32744	4.28296	6.11696	4.70063	4.21023	4.21179	3.66928	4.95264	6.49456	4.54504	3.21906
O00469	PLOD2	10.0553	11.9617	8.31601	4.54373	3.5057	4.1148	1.57085	2.88496	2.14148	5.50526	5.28821	6.31535	4.21179	6.11546	6.1908	4.87092	5.45405	3.21906
Q14C86	GAPVD1	0	0	0	5.30102	6.13497	5.1435	6.28338	5.76992	7.13827	6.11696	4.70063	4.91194	4.21179	5.50391	6.80988	0	1.81802	3.21906
Q9P2Q2	FRMD4A	0	0	0	4.54373	5.25855	5.1435	4.71254	4.32744	3.56913	3.05848	2.35031	2.80682	4.21179	3.66928	3.71448	2.43546	1.81802	5.63335
P00492	HPRT1	0	0	0	3.78644	4.38212	3.0861	4.71254	5.04868	6.42444	5.50526	6.46336	5.61364	4.21179	4.28082	3.71448	5.68274	5.45405	2.41429
O60841	EIF5B	0	0	0	3.02916	7.01139	8.22961	4.71254	3.6062	3.56913	4.89356	5.28821	4.21023	4.21179	2.44618	4.33356	6.49456	6.36306	2.41429
O95486	SEC24A	0	0	0	3.78644	4.38212	4.1148	7.85423	5.04868	4.99679	4.28187	4.11305	4.91194	4.21179	3.05773	3.0954	2.43546	4.54504	1.60953
Q00587	CDC42EP1	0	0	0	3.02916	0	0	7.0688	7.93365	8.56592	5.50526	5.87579	5.61364	4.21179	2.44618	1.85724	2.43546	3.63603	3.21906
Q9UIA9	XPO7	0	0	0	0	0	0	1.57085	0	0	3.05848	3.52547	1.40341	4.21179	1.83464	1.85724	1.62364	0	1.60953
P62910	RPL32	10.0553	9.56938	6.23701	3.02916	2.62927	5.1435	2.35627	2.88496	2.85531	2.44678	1.76274	2.80682	4.21179	3.05773	3.0954	3.24728	3.63603	1.60953
Q9Y4G6	TLN2	0	0	0	5.30102	2.62927	4.1148	7.85423	7.21241	4.99679	11.6222	8.2261	9.12217	4.21179	4.89237	5.57172	2.43546	2.72702	7.24288
P50402	EMD	0	14.3541	6.23701	9.08747	7.88782	5.1435	3.14169	2.88496	2.14148	3.67017	5.28821	2.80682	4.21179	1.83464	4.33356	10.5537	16.3621	2.41429
P43686	PSMC4	0	0	0	2.27187	2.62927	2.0574	3.14169	2.88496	0	0	2.35031	2.80682	3.61011	3.66928	4.33356	1.62364	1.81802	4.02382
A1X283	SH3PXD2B	0	0	0	3.78644	3.5057	2.0574	3.92711	3.6062	2.14148	4.89356	5.28821	5.61364	3.61011	3.66928	4.33356	5.68274	3.63603	4.82859
P26368	U2AF2	22.6244	23.9234	24.948	3.78644	6.13497	4.1148	3.92711	3.6062	3.56913	5.50526	5.28821	4.91194	3.61011	3.66928	2.47632	9.74184	13.6351	4.82859
Q9Y262	EIF3L	0	0	0	10.602	15.7756	14.4018	7.0688	6.49116	6.42444	6.72865	5.87579	6.31535	3.61011	4.28082	6.1908	4.0591	3.63603	7.24288
Q14699	RFTN1	5.02765	0	6.23701	3.78644	2.62927	3.0861	3.14169	2.88496	3.56913	3.05848	5.87579	4.21023	3.61011	4.89237	5.57172	4.0591	4.54504	7.24288
P17812	CTPS1	5.02765	4.78469	6.23701	4.54373	4.38212	6.1722	4.71254	7.21241	7.13827	6.11696	6.46336	5.61364	3.61011	4.89237	4.33356	8.1182	8.18107	4.82859
P19838	NFKB1	0	0	0	4.54373	4.38212	3.0861	4.71254	5.04868	7.13827	6.72865	5.28821	4.91194	3.61011	2.44618	2.47632	0	0	1.60953
Q8IWE2	FAM114A1	0	0	0	3.02916	4.38212	3.0861	2.35627	4.32744	2.85531	5.50526	5.28821	7.71876	3.61011	1.83464	3.0954	3.24728	0	4.02382
Q6Y7W6	GIGYF2	0	0	0	3.02916	2.62927	3.0861	3.14169	2.88496	2.14148	2.44678	2.35031	1.40341	3.61011	3.66928	3.71448	2.43546	1.81802	3.21906
Q8IY17	PNPLA6	5.02765	7.17703	6.23701	5.30102	4.38212	5.1435	5.49796	2.88496	3.56913	6.11696	4.70063	4.21023	3.61011	3.66928	3.0954	3.24728	2.72702	3.21906
P23258	TUBG1	0	0	0	3.78644	4.38212	0	0	2.88496	2.14148	0	0	2.10512	3.61011	2.44618	2.47632	4.87092	0	3.21906
O75694	NUP155	0	0	0	5.30102	4.38212	3.0861	5.49796	4.32744	2.85531	3.05848	2.35031	2.80682	3.61011	4.89237	4.95264	0	0	4.82859
Q9H0A0	NAT10	10.0553	16.7464	20.79	3.78644	6.13497	4.1148	3.92711	2.88496	5.71061	1.83509	1.17516	0	3.61011	3.66928	3.71448	3.24728	3.63603	1.60953
Q9NVI7	ATAD3A	0	0	0	1.51458	2.62927	0	0	0	0	0	0	0	3.61011	5.50391	4.95264	3.24728	5.45405	2.41429
Q8TEQ6	GEMIN5	0	0	0	6.8156	6.13497	4.1148	7.85423	7.21241	9.99358	5.50526	5.28821	5.61364	3.61011	3.66928	5.57172	0	0	4.02382
Q01804	OTUD4	0	0	0	5.30102	7.01139	4.1148	3.92711	2.88496	2.85531	2.44678	2.35031	1.40341	3.61011	1.22309	1.85724	0	0	0
Q9BZG1	RAB34	5.02765	0	0	1.51458	1.75285	4.1148	4.71254	3.6062	4.99679	3.67017	4.70063	5.61364	3.61011	3.66928	4.33356	5.68274	3.63603	5.63335
Q16543	CDC37	0	0	4.158	5.30102	5.25855	5.1435	5.49796	6.49116	5.71061	5.50526	5.87579	7.01705	3.61011	4.28082	4.33356	5.68274	6.36306	6.43811
Q9UJ70	NAGK	0	0	0	3.02916	4.38212	2.0574	3.14169	3.6062	3.56913	4.28187	7.05094	7.71876	3.61011	1.83464	1.85724	3.24728	3.63603	4.02382
Q9H223	EHD4	0	0	0	0	0	0	5.49796	6.49116	4.28296	4.89356	2.93789	4.21023	3.61011	3.05773	2.47632	0	1.81802	3.21906
P07384	CAPN1	0	0	0	12.1166	12.2699	12.3444	10.9959	12.9823	8.56592	9.78713	9.98884	7.71876	3.61011	2.44618	3.71448	6.49456	5.45405	8.04764
P05198	EIF2S1	0	0	0	0	4.38212	3.0861	0	3.6062	2.14148	3.67017	4.11305	2.80682	3.61011	1.83464	2.47632	2.43546	2.72702	2.41429
P47897	QARS1	10.0553	7.17703	0	7.57289	6.13497	9.25831	7.0688	2.88496	5.71061	4.28187	2.93789	4.21023	3.61011	5.50391	4.33356	2.43546	3.63603	3.21906
P30044	PRDX5	0	0	0	3.78644	4.38212	4.1148	3.92711	4.32744	4.28296	4.28187	4.11305	4.91194	3.61011	3.05773	2.47632	5.68274	6.36306	5.63335
P21291	CSRP1	0	0	0	3.02916	4.38212	4.1148	3.14169	2.16372	2.14148	3.05848	2.93789	3.50853	3.61011	3.05773	3.71448	8.93002	9.09008	4.02382
P11234	RALB	0	0	0	0	0	0	3.14169	2.88496	2.85531	3.67017	5.87579	2.80682	3.61011	1.83464	2.47632	6.49456	4.54504	4.82859
P41240	CSK	0	0	0	0	0	0	0	2.88496	1.42765	3.05848	3.52547	4.21023	3.61011	1.83464	2.47632	2.43546	0	3.21906
O94855	SEC24D	0	0	0	4.54373	5.25855	3.0861	3.14169	5.04868	4.99679	4.28187	4.70063	4.21023	3.61011	3.66928	4.33356	4.87092	4.54504	2.41429
Q96EA4	SPDL1	0	0	0	4.54373	3.5057	4.1148	3.14169	0	2.14148	0	1.76274	2.10512	3.61011	2.44618	3.71448	0	0	0
Q9BY44	EIF2A	0	0	0	3.78644	5.25855	7.20091	2.35627	2.88496	2.14148	5.50526	4.70063	2.80682	3.61011	0	3.71448	5.68274	6.36306	4.02382
P31153	MAT2A	0	0	0	2.27187	1.75285	0	3.92711	4.32744	3.56913	3.05848	2.35031	2.80682	3.61011	1.22309	3.0954	2.43546	4.54504	1.60953
P62269	RPS18	0	0	0	2.27187	0	4.1148	2.35627	2.88496	3.56913	2.44678	2.35031	2.80682	3.61011	1.83464	1.85724	4.0591	6.36306	2.41429
P20337	RAB3B	12.5691	11.9617	14.553	2.27187	1.75285	2.0574	3.14169	3.6062	4.99679	2.44678	2.35031	2.80682	3.00842	1.22309	3.71448	3.24728	3.63603	2.41429
Q29RF7	PDS5A	0	0	0	3.78644	3.5057	3.0861	0	0	0	0	0	0	3.00842	3.05773	3.71448	0	0	1.60953
Q9H9H4	VPS37B	0	0	0	1.51458	1.75285	2.0574	3.92711	5.04868	4.99679	4.28187	3.52547	2.80682	3.00842	1.83464	3.71448	3.24728	1.81802	5.63335
Q8WUM0	NUP133	0	0	0	3.78644	1.75285	2.0574	3.14169	2.16372	2.85531	1.22339	2.35031	3.50853	3.00842	2.44618	3.0954	0	0	0
P19174	PLCG1	0	0	0	3.78644	3.5057	3.0861	4.71254	5.04868	4.99679	6.11696	5.28821	5.61364	3.00842	2.44618	3.0954	5.68274	4.54504	6.43811
Q969Z0	TBRG4	0	0	0	0	0	0	2.35627	2.16372	2.14148	0	1.17516	0	3.00842	1.83464	2.47632	1.62364	1.81802	0
Q07065	CKAP4	0	0	0	16.6604	21.0342	18.5166	7.0688	4.32744	4.28296	4.28187	4.11305	5.61364	3.00842	4.28082	3.0954	5.68274	10.9081	5.63335
Q9P0V9	SEPTIN10	0	0	0	3.78644	1.75285	7.20091	3.92711	5.76992	6.42444	4.28187	5.28821	5.61364	3.00842	6.11546	5.57172	1.62364	2.72702	5.63335
P50395	GDI2	0	0	0	1.51458	1.75285	2.0574	4.71254	5.04868	4.28296	5.50526	6.46336	4.91194	3.00842	2.44618	4.33356	7.30638	9.09008	1.60953
P84095	RHOG	0	0	0	1.51458	0	3.0861	3.14169	2.88496	2.14148	3.05848	3.52547	2.80682	3.00842	3.05773	3.71448	6.49456	5.45405	4.82859
P07996	THBS1	20.1106	19.1388	18.711	1.51458	2.62927	0	2.35627	3.6062	2.14148	1.83509	2.93789	3.50853	3.00842	2.44618	2.47632	2.43546	3.63603	1.60953
O00291	HIP1	0	0	0	3.78644	1.75285	2.0574	3.92711	2.88496	1.42765	3.05848	2.93789	3.50853	3.00842	3.05773	1.85724	0	0	0
Q8NAP3	ZBTB38	0	0	0	6.8156	7.88782	9.25831	2.35627	2.16372	2.85531	2.44678	1.17516	2.10512	3.00842	4.28082	4.95264	0	0	3.21906
P12081	HARS1	0	0	0	3.78644	2.62927	3.0861	6.28338	4.32744	4.99679	4.89356	4.11305	3.50853	3.00842	2.44618	4.33356	2.43546	2.72702	5.63335
O96008	TOMM40	0	0	0	1.51458	0	0	3.92711	2.16372	2.85531	3.05848	1.76274	2.80682	3.00842	2.44618	3.71448	3.24728	2.72702	4.82859
P30085	CMPK1	0	0	0	0	0	0	0	2.16372	1.42765	1.83509	2.35031	2.10512	3.00842	2.44618	2.47632	3.24728	4.54504	2.41429
Q15645	TRIP13	0	0	0	4.54373	4.38212	5.1435	5.49796	4.32744	6.42444	4.28187	4.11305	4.91194	3.00842	2.44618	4.33356	4.0591	5.45405	1.60953
P46939	UTRN	0	0	0	3.78644	3.5057	0	18.8501	15.8673	17.8457	14.069	8.81368	12.6307	3.00842	3.05773	4.33356	1.62364	0	2.41429
O95336	PGLS	0	0	0	1.51458	0	2.0574	2.35627	2.88496	2.85531	1.83509	1.76274	2.10512	3.00842	2.44618	3.71448	1.62364	3.63603	2.41429
P35658	NUP214	15.083	11.9617	14.553	5.30102	7.88782	6.1722	2.35627	0	1.42765	4.89356	4.70063	4.21023	3.00842	4.89237	2.47632	5.68274	9.99909	4.02382
P04150	NR3C1	0	0	0	6.05831	5.25855	5.1435	1.57085	6.49116	4.28296	3.67017	4.70063	4.21023	3.00842	1.83464	3.71448	1.62364	0	3.21906
Q7Z2W4	ZC3HAV1	0	0	0	3.78644	5.25855	5.1435	7.85423	7.21241	6.42444	6.72865	6.46336	7.71876	3.00842	3.05773	6.80988	4.0591	1.81802	3.21906
Q13616	CUL1	0	0	0	1.51458	4.38212	3.0861	1.57085	0	2.14148	3.05848	2.35031	2.10512	3.00842	1.83464	2.47632	2.43546	1.81802	2.41429
Q9Y2T2	AP3M1	0	7.17703	4.158	2.27187	1.75285	0	0	2.16372	2.14148	4.28187	2.35031	3.50853	3.00842	2.44618	2.47632	3.24728	1.81802	1.60953
O15084	ANKRD28	0	0	0	5.30102	2.62927	4.1148	4.71254	2.88496	2.85531	3.67017	4.11305	3.50853	3.00842	2.44618	3.71448	0	0	3.21906
Q92888	ARHGEF1	0	0	0	0	1.75285	0	3.14169	2.16372	3.56913	4.28187	2.93789	3.50853	3.00842	6.11546	1.85724	0	1.81802	0
O15397	IPO8	0	0	0	0	0	0	0	0	0	1.22339	1.76274	0	3.00842	1.22309	1.85724	0	0	2.41429
Q8NEM2	SHCBP1	0	0	0	3.78644	3.5057	2.0574	3.92711	1.44248	2.14148	0	0	0	3.00842	2.44618	2.47632	2.43546	0	1.60953
Q96PE2	ARHGEF17	0	0	0	8.33018	9.64067	9.25831	4.71254	5.04868	6.42444	4.89356	4.11305	4.21023	3.00842	8.56164	5.57172	0	0	3.21906
O14936	CASK	0	0	0	1.51458	0	0	6.28338	5.04868	3.56913	5.50526	6.46336	5.61364	3.00842	1.83464	3.0954	0	0	3.21906
Q96PK6	RBM14	15.083	11.9617	14.553	4.54373	4.38212	6.1722	4.71254	2.88496	3.56913	4.28187	4.11305	2.10512	3.00842	3.05773	4.95264	3.24728	8.18107	4.02382
P23508	MCC	0	0	0	2.27187	2.62927	3.0861	1.57085	2.88496	3.56913	2.44678	2.35031	2.80682	3.00842	2.44618	1.23816	0	0	1.60953
P55084	HADHB	7.54148	11.9617	10.395	1.51458	0	0	3.92711	3.6062	2.14148	1.83509	1.17516	2.10512	3.00842	4.28082	2.47632	1.62364	5.45405	2.41429
P55209	NAP1L1	0	0	0	3.78644	5.25855	4.1148	4.71254	2.16372	5.71061	4.89356	4.70063	2.80682	3.00842	1.83464	2.47632	5.68274	6.36306	3.21906
Q02750	MAP2K1	0	0	0	0	0	0	2.35627	2.88496	2.85531	0	2.93789	3.50853	3.00842	3.05773	3.0954	0	0	1.60953
P17858	PFKL	10.0553	11.9617	12.474	3.78644	3.5057	3.0861	2.35627	5.76992	4.99679	5.50526	5.28821	6.31535	3.00842	2.44618	3.0954	3.24728	3.63603	1.60953
Q969V3	NCLN	0	0	4.158	0	0	3.0861	2.35627	3.6062	2.85531	3.05848	1.76274	3.50853	3.00842	0	1.85724	0	1.81802	0
Q05209	PTPN12	0	0	0	2.27187	4.38212	4.1148	3.14169	5.04868	7.8521	4.28187	2.93789	4.21023	3.00842	4.28082	1.23816	4.87092	3.63603	4.02382
P42704	LRPPRC	0	0	0	2.27187	0	0	4.71254	2.16372	2.85531	3.05848	2.93789	1.40341	3.00842	1.22309	2.47632	4.0591	2.72702	0
P28331	NDUFS1	0	0	0	0	0	0	0	0	1.42765	1.83509	1.76274	0	3.00842	2.44618	0	2.43546	1.81802	0
Q7Z6B7	SRGAP1	0	0	0	2.27187	1.75285	4.1148	7.85423	5.76992	9.99358	6.72865	6.46336	6.31535	3.00842	4.28082	4.33356	1.62364	0	4.82859
Q9H9B4	SFXN1	7.54148	7.17703	6.23701	2.27187	0	0	1.57085	2.16372	0	3.05848	2.35031	1.40341	3.00842	0	1.23816	2.43546	1.81802	1.60953
O00186	STXBP3	0	0	0	0	0	0	2.35627	2.88496	4.99679	4.28187	4.70063	3.50853	3.00842	1.22309	4.33356	4.87092	2.72702	6.43811
P35606	COPB2	0	0	0	6.05831	7.88782	11.3157	6.28338	6.49116	5.71061	7.95204	5.87579	3.50853	3.00842	3.05773	6.1908	4.87092	7.27207	4.02382
P00568	AK1	0	0	0	0	0	0	0	0	0	3.05848	3.52547	3.50853	3.00842	0	3.0954	1.62364	1.81802	0
Q03135	CAV1	37.7074	35.8852	39.501	19.6895	31.5513	33.9471	10.2105	11.5398	9.27975	6.11696	6.46336	5.61364	15.0421	19.5695	17.3342	16.2364	37.2693	12.8762
P09382	LGALS1	12.5691	11.9617	10.395	9.84476	9.64067	10.287	15.7085	11.5398	12.1351	9.78713	9.40126	11.2273	9.02527	8.56164	9.2862	12.1773	9.99909	12.0715
Q58FF8	HSP90AB2P	0	0	0	6.05831	7.88782	10.287	7.85423	7.21241	7.13827	6.11696	5.28821	7.01705	8.42359	6.72701	7.42896	8.93002	9.99909	8.04764
Q58FF6	HSP90AB4P	0	0	0	6.05831	6.13497	6.1722	3.92711	5.04868	2.85531	3.05848	2.93789	3.50853	7.8219	4.89237	6.1908	10.5537	14.5441	5.63335
P18621	RPL17	20.1106	14.3541	12.474	4.54373	4.38212	2.0574	4.71254	3.6062	4.28296	3.05848	3.52547	2.10512	7.8219	6.11546	4.33356	3.24728	4.54504	3.21906
Q66PJ3	ARL6IP4	57.818	45.4545	68.6071	9.08747	8.76424	4.1148	3.92711	2.16372	2.85531	5.50526	5.28821	4.21023	7.22022	6.11546	6.80988	12.1773	23.6342	10.4619
Q58FF7	HSP90AB3P	0	0	0	3.02916	3.5057	3.0861	3.14169	2.16372	4.99679	5.50526	5.28821	3.50853	6.61853	6.11546	4.95264	4.87092	3.63603	6.43811
P55795	HNRNPH2	10.0553	4.78469	8.31601	4.54373	5.25855	8.22961	4.71254	5.76992	4.28296	3.05848	8.2261	5.61364	5.41516	4.28082	8.04804	11.3655	9.99909	8.85241
P33778	H2BC3	22.6244	31.1005	43.659	2.27187	3.5057	0	5.49796	3.6062	2.85531	3.67017	2.93789	2.80682	5.41516	4.28082	4.33356	15.4246	19.0892	5.63335
P62280	RPS11	7.54148	9.56938	0	2.27187	3.5057	3.0861	4.71254	4.32744	4.28296	2.44678	1.76274	4.21023	5.41516	5.50391	4.95264	5.68274	6.36306	1.60953
P27635	RPL10	12.5691	11.9617	8.31601	3.78644	3.5057	3.0861	3.14169	4.32744	3.56913	3.67017	4.70063	2.80682	4.81348	4.89237	3.71448	4.87092	5.45405	4.02382
P62136	PPP1CA	0	0	0	3.02916	0	2.0574	4.71254	3.6062	2.14148	3.05848	3.52547	4.91194	4.81348	4.28082	4.95264	3.24728	4.54504	4.82859
Q9Y285	FARSA	0	0	0	1.51458	1.75285	0	1.57085	4.32744	2.14148	4.28187	5.87579	3.50853	4.81348	5.50391	5.57172	4.0591	6.36306	3.21906
Q9NS69	TOMM22	7.54148	4.78469	0	1.51458	0	3.0861	3.14169	2.16372	2.85531	1.83509	2.35031	2.80682	4.21179	3.66928	3.71448	4.87092	5.45405	4.82859
P05387	RPLP2	17.5968	19.1388	10.395	3.02916	3.5057	3.0861	3.14169	2.16372	2.14148	3.05848	2.35031	2.10512	4.21179	4.28082	4.33356	4.87092	3.63603	4.02382
Q13557	CAMK2D	0	0	0	9.84476	11.3935	10.287	4.71254	3.6062	4.28296	2.44678	2.93789	3.50853	4.21179	3.66928	4.95264	4.0591	3.63603	3.21906
Q14165	MLEC	0	0	0	5.30102	1.75285	2.0574	1.57085	0	0	0	2.35031	2.10512	4.21179	2.44618	3.71448	8.1182	3.63603	5.63335
O95721	SNAP29	0	0	0	0	0	0	2.35627	3.6062	4.99679	4.89356	4.70063	5.61364	4.21179	1.83464	4.95264	6.49456	3.63603	6.43811
P31946	YWHAB	0	0	0	2.27187	2.62927	3.0861	3.92711	5.76992	4.99679	5.50526	4.11305	5.61364	4.21179	3.66928	6.1908	6.49456	8.18107	8.04764
Q9H694	BICC1	0	0	0	3.78644	2.62927	3.0861	4.71254	6.49116	6.42444	6.11696	8.2261	7.71876	4.21179	4.89237	6.1908	4.0591	1.81802	8.85241
Q9Y277	VDAC3	15.083	14.3541	12.474	6.8156	8.76424	6.1722	7.0688	5.76992	6.42444	1.83509	1.76274	1.40341	4.21179	4.89237	4.33356	6.49456	9.09008	4.02382
Q13554	CAMK2B	0	0	0	3.78644	4.38212	4.1148	3.92711	5.04868	4.28296	3.67017	4.11305	4.21023	4.21179	4.28082	4.95264	3.24728	2.72702	3.21906
P32969	RPL9; RPL9P7; RPL9P8; RPL9P9	30.1659	23.9234	37.422	5.30102	4.38212	4.1148	9.42507	7.93365	9.27975	8.56374	11.164	10.5256	4.21179	5.50391	5.57172	4.87092	6.36306	2.41429
P62330	ARF6	0	0	0	0	1.75285	0	3.92711	2.88496	3.56913	3.05848	3.52547	4.21023	4.21179	3.66928	3.71448	4.0591	5.45405	3.21906
P07951	TPM2	0	0	12.474	2.27187	2.62927	3.0861	5.49796	8.65489	6.42444	4.28187	5.28821	4.91194	4.21179	5.50391	6.1908	4.87092	2.72702	6.43811
P83731	RPL24	15.083	19.1388	10.395	4.54373	7.01139	6.1722	6.28338	4.32744	4.99679	3.67017	2.93789	3.50853	4.21179	4.89237	4.33356	4.87092	5.45405	3.21906
Q92526	CCT6B	0	0	4.158	3.02916	0	0	3.14169	2.16372	3.56913	2.44678	2.35031	2.80682	4.21179	4.28082	4.33356	4.0591	5.45405	0
Q9UNX3	RPL26L1	15.083	19.1388	12.474	6.05831	5.25855	5.1435	3.92711	2.88496	2.85531	1.83509	2.93789	3.50853	4.21179	3.66928	6.1908	4.87092	5.45405	3.21906
P63241	EIF5A	0	0	0	1.51458	0	0	2.35627	4.32744	3.56913	3.67017	2.35031	2.80682	3.61011	1.83464	1.85724	4.87092	3.63603	3.21906
P14866	HNRNPL	0	0	0	27.2624	25.4163	10.287	4.71254	5.76992	2.14148	6.11696	5.28821	5.61364	3.61011	7.9501	4.95264	10.5537	8.18107	7.24288
P04899	GNAI2	0	0	0	1.51458	1.75285	3.0861	3.14169	2.88496	3.56913	3.67017	3.52547	3.50853	3.61011	2.44618	3.0954	7.30638	6.36306	5.63335
P33316	DUT	0	0	0	1.51458	0	0	1.57085	1.44248	1.42765	1.83509	1.76274	2.10512	3.61011	1.83464	1.85724	1.62364	1.81802	4.82859
O75153	CLUH	0	0	0	4.54373	2.62927	8.22961	3.92711	2.16372	4.28296	3.05848	4.70063	2.10512	3.61011	1.83464	2.47632	0	0	0
Q5T6F2	UBAP2	0	0	0	4.54373	6.13497	7.20091	7.0688	9.37613	7.13827	4.89356	5.28821	4.21023	3.61011	4.28082	3.0954	2.43546	3.63603	4.02382
O15269	SPTLC1	5.02765	9.56938	4.158	3.02916	3.5057	4.1148	2.35627	2.16372	2.14148	2.44678	1.76274	2.10512	3.61011	3.66928	2.47632	0	1.81802	3.21906
P0DP24	CALM2	0	0	0	3.02916	0	3.0861	2.35627	4.32744	0	2.44678	3.52547	2.80682	3.61011	3.05773	3.0954	4.87092	4.54504	1.60953
O95573	ACSL3	7.54148	9.56938	0	2.27187	1.75285	3.0861	1.57085	2.16372	2.85531	4.89356	4.70063	2.80682	3.61011	3.05773	3.0954	4.0591	3.63603	4.02382
Q9NP64	ZCCHC17	22.6244	21.5311	18.711	4.54373	7.01139	6.1722	5.49796	4.32744	4.99679	3.05848	5.28821	3.50853	3.61011	3.66928	3.0954	21.1073	31.8153	6.43811
O76003	GLRX3	0	0	0	3.78644	4.38212	5.1435	4.71254	6.49116	6.42444	6.11696	5.87579	6.31535	3.61011	4.28082	4.33356	4.87092	2.72702	5.63335
Q05397	PTK2	0	0	0	0	0	0	1.57085	2.16372	3.56913	3.67017	4.11305	4.21023	3.61011	2.44618	3.0954	3.24728	1.81802	2.41429
P53999	SUB1	22.6244	19.1388	18.711	6.05831	7.01139	6.1722	3.14169	3.6062	2.14148	4.89356	4.70063	5.61364	3.61011	4.89237	4.33356	10.5537	13.6351	4.82859
P46977	STT3A	5.02765	4.78469	6.23701	3.78644	2.62927	5.1435	2.35627	3.6062	3.56913	2.44678	1.17516	4.21023	3.61011	2.44618	3.71448	2.43546	3.63603	2.41429
P62805	H4C1; H4C2; H4C3; H4C4; H4C5; H4C6; H4C8; H4C9; H4C11; H4C12; H4C13; H4C14; H4C15; H4C16	25.1383	43.0622	31.185	3.02916	0	2.0574	2.35627	1.44248	2.14148	1.83509	1.17516	2.10512	3.61011	1.22309	0	4.0591	8.18107	0
P22392	NME2	0	0	0	3.02916	4.38212	0	2.35627	0	2.85531	0	2.35031	0	3.61011	3.66928	3.0954	4.87092	2.72702	0
Q15005	SPCS2	0	0	0	3.78644	3.5057	3.0861	2.35627	3.6062	4.28296	1.83509	1.17516	2.10512	3.00842	3.66928	4.33356	4.87092	3.63603	5.63335
O75116	ROCK2	0	0	0	4.54373	7.01139	6.1722	4.71254	3.6062	3.56913	4.89356	4.70063	3.50853	3.00842	3.05773	3.71448	0	0	1.60953
O95671	ASMTL	7.54148	7.17703	6.23701	3.02916	4.38212	3.0861	6.28338	7.21241	6.42444	7.95204	8.2261	7.71876	3.00842	2.44618	4.33356	2.43546	2.72702	2.41429
P40189	IL6ST	0	0	0	2.27187	0	0	4.71254	4.32744	4.28296	3.05848	2.93789	2.10512	3.00842	2.44618	3.0954	4.87092	2.72702	2.41429
Q9Y6M7	SLC4A7	0	0	0	0	0	0	2.35627	3.6062	3.56913	3.05848	3.52547	4.21023	3.00842	4.89237	4.95264	3.24728	3.63603	4.82859
Q16881	TXNRD1	0	0	0	3.02916	4.38212	3.0861	8.63965	7.93365	9.99358	4.89356	3.52547	3.50853	3.00842	3.66928	4.33356	4.0591	1.81802	4.02382
P31689	DNAJA1	0	0	0	3.02916	2.62927	3.0861	3.14169	3.6062	2.85531	2.44678	2.35031	2.10512	3.00842	3.66928	3.71448	4.0591	2.72702	4.02382
Q7Z417	NUFIP2	0	0	0	11.3593	7.01139	8.22961	7.0688	5.04868	5.71061	2.44678	3.52547	3.50853	3.00842	2.44618	3.71448	0	2.72702	4.82859
P11274	BCR	0	0	0	0	0	2.0574	3.14169	1.44248	2.14148	3.67017	3.52547	2.80682	3.00842	3.05773	3.0954	0	0	0
Q96PD2	DCBLD2	0	0	0	1.51458	0	0	6.28338	3.6062	3.56913	4.28187	4.11305	2.80682	3.00842	2.44618	2.47632	4.87092	4.54504	4.02382
Q9NUQ6	SPATS2L	0	0	0	1.51458	1.75285	0	3.14169	1.44248	2.85531	3.67017	3.52547	3.50853	3.00842	0	2.47632	0	0	2.41429
Q13671	RIN1	0	0	0	4.54373	3.5057	7.20091	5.49796	5.76992	4.99679	2.44678	3.52547	4.91194	3.00842	2.44618	2.47632	3.24728	4.54504	2.41429
Q15631	TSN	0	0	0	5.30102	3.5057	3.0861	3.92711	4.32744	3.56913	2.44678	2.93789	5.61364	3.00842	2.44618	3.0954	3.24728	0	2.41429
Q6YN16	HSDL2	10.0553	7.17703	0	0	0	3.0861	2.35627	2.88496	2.14148	3.05848	1.76274	2.80682	3.00842	2.44618	1.23816	1.62364	3.63603	1.60953
Q9Y2L1	DIS3	0	0	0	2.27187	2.62927	2.0574	0	0	0	0	1.76274	0	3.00842	2.44618	1.23816	1.62364	0	1.60953
Q13459	MYO9B	0	0	0	1.51458	5.25855	2.0574	2.35627	0	2.14148	1.83509	1.17516	2.80682	3.00842	3.66928	2.47632	0	0	2.41429
P61163	ACTR1A	0	0	0	3.78644	5.25855	3.0861	2.35627	3.6062	2.85531	3.67017	3.52547	2.80682	3.00842	1.22309	3.71448	2.43546	2.72702	2.41429
P04181	OAT	7.54148	9.56938	10.395	3.02916	2.62927	2.0574	2.35627	2.88496	1.42765	1.22339	0	1.40341	3.00842	3.05773	2.47632	4.87092	4.54504	2.41429
P52888	THOP1	0	0	0	3.02916	3.5057	2.0574	3.14169	5.04868	4.28296	2.44678	4.11305	0	3.00842	1.22309	2.47632	4.0591	3.63603	4.02382
P36776	LONP1	0	0	0	0	0	0	0	0	0	0	1.76274	0	3.00842	1.83464	2.47632	2.43546	1.81802	0
Q96J84	KIRREL1	0	0	0	0	0	0	3.92711	3.6062	4.99679	4.28187	5.28821	1.40341	3.00842	3.05773	2.47632	5.68274	2.72702	7.24288
Q8IZP0	ABI1	0	0	0	0	0	0	3.14169	2.88496	3.56913	2.44678	5.28821	3.50853	3.00842	3.05773	2.47632	2.43546	1.81802	0
Q9NZI8	IGF2BP1	0	0	0	0	0	0	0	0	0	1.83509	2.35031	2.80682	3.00842	1.22309	1.23816	3.24728	2.72702	0
P23458	JAK1	0	0	0	0	0	2.0574	4.71254	5.76992	4.28296	4.28187	3.52547	5.61364	3.00842	1.83464	4.33356	2.43546	0	4.02382
[truncated: 2,057 more rows]

## Sheet: Raw Data
Uniprot	Gene	Ctrl-1	Ctrl-2	Ctrl-3	APEX-1	APEX-2	APEX-3	scMerA-1	scMerA-2	scMerA-3	MerA-1	MerA-2	MerA-3	scMer2A-1	scMer2A-2	scMer2A-3	Mer2A-1	Mer2A-2	Mer2A-3
[truncated: 2,815 more rows]
