# Supplementary material for: Active Merlin Binds RalB to Regulate Exocytosis
Source: bioRxiv preprint, doi:10.1101/2025.06.13.659557, version 1 (2025-06-19)
Supplement: GO Analysis [file 659557_file04.xlsx]

## Sheet: String Functional Enrichement
category	description	FDR value	network.SUID	p-value	transferred FDR value	term name	# background genes	# genes	genes
WikiPathways	16p11.2 proximal deletion syndrome	0.0013	3031	7.91e-05	0.288606	WP4949	74	10	CCT7|CCT6A|CCT5|TCP1|PPP2R1A|EZR|CASP8|MSN|CCT4|PPP2R5D
WikiPathways	1q21.1 copy number variation syndrome	0.0149	3031	0.0015	0.182681	WP4905	27	5	KIRREL1|AFDN|TJP2|PRKAB1|CTNNB1
Reactome Pathways	ABC-family proteins mediated transport	0.0204	3031	0.0029	0.169037	HSA-382556	102	9	PSMC4|PSMD10|PSMA2|PSMC1|PSMD11|PSMD12|EIF2S2|PSME1|ABCC1
TISSUES	Abdomen	0.0377	3031	0.0017	0.142366	BTO:0000020	113	10	SRI|PKM|LLGL1|RPS2|ANXA2|RPS3A|RPL10|ACTG1|RPL9|ENO1
Monarch Phenotype	Abdominal symptom	0.0014	3031	9.04e-06	0.285387	HP:0011458	1448	69	AIMP2|GALK1|SLC25A11|SLC1A4|PMPCB|PI4KA|RRAS2|MPP5|TAOK1|AARS1|SLC12A2|MAP2K2|ARCN1|CBL|ACAT1|EGFR|NONO|VPS51|INPPL1|HPRT1|MAP2K1|BCR|YWHAG|MET|FMN2|UGDH|TUBB3|PPP2R1A|RAB11B|EPB41L1|EZR|PARK7|PSMD12|AP1B1|EPHB4|GMPPA|CASP8|MYPN|MYLK|LONP1|NHLRC2|MAP3K7|NRAS|RARS2|GNAI3|CMPK1|STXBP1|APRT|OPTN|ITPA|IL6ST|WASF1|ASNS|FAT4|ANXA11|DDOST|RAB3GAP1|EIF2B1|GPHN|PPP2R5D|ITGA7|ACTG1|PHGDH|CASK|CTNNB1|TPM2|E…
Monarch Phenotype	Abnormal anterior eye segment morphology	0.018	3031	0.00031	0.174473	HP:0004328	1106	51	RP2|ACTA2|GALK1|SLC25A11|NOTCH2|MPP5|PDGFRB|SLC12A2|MAP2K2|ARCN1|PIK3C2A|CDH11|CDH2|EGFR|GNAQ|NRG1|SEC23A|MMP14|RPS15A|MPDZ|PSMD12|AP1B1|GMPPA|EPHA2|MYLK|LONP1|MAP3K7|NRAS|BICC1|FGD1|NHS|ITPA|IL6ST|PPP1R12A|TKT|RHOA|RAB3GAP1|EIF2B1|SLC2A1|PPP2R5D|FLNB|TENM3|DAG1|PLCB3|ACTG1|YAP1|PHGDH|MTAP|CASK|RPS7|RPL11
Monarch Phenotype	Abnormal appendicular skeleton morphology	0.00075	3031	4.49e-06	0.312494	HP:0011844	1557	74	EFNB1|ACTA2|PI4KA|RRAS2|NOTCH2|MPP5|AARS1|PDGFRB|SLC12A2|MAP2K2|ARCN1|CBL|RAB7A|PIK3C2A|CDH11|RASA1|NONO|VPS51|DNAAF5|INPPL1|MAP2K1|SEC23A|MMP14|MET|RPS15A|TUBB3|PPP2R1A|FTSJ1|BGN|RAB11B|EXOC7|ARHGEF1|ACSL4|PSMD12|ANKLE2|MYLK|LONP1|KIF14|MAP3K7|NRAS|NSDHL|CHUK|DPM1|STXBP1|FGD1|NHS|SBF1|IL6ST|GARS1|WASF1|FAT4|CTNND1|PPP1R12A|GDI1|RHOA|RAB3GAP1|RPL10|SLC2A1|GPHN|PPP2R5D|FLNB|SERPINH1|DAG1|PLCB3|ITG…
Monarch Phenotype	Abnormal axial skeleton morphology	2.55e-05	3031	4.97e-08	0.459346	HP:0009121	2206	104	EFNB1|SNAP29|AHCY|AIMP2|ACTA2|GALK1|SLC1A4|PMPCB|PI4KA|RRAS2|NOTCH2|MPP5|TAOK1|AARS1|PDGFRB|SLC12A2|MAP2K2|ARCN1|CBL|TUBB4A|TNPO3|PIK3C2A|CDH11|CDH2|RASA1|NONO|VPS51|ANK3|QDPR|GNAQ|DNAAF5|INPPL1|MAP2K1|YWHAG|SEC23A|MMP14|ITGA3|MET|VPS37A|RPS15A|FMN2|UGDH|MPDZ|TUBB3|TUFM|PPP2R1A|FTSJ1|BGN|RAB11B|EXOC7|EPB41L1|EZR|ACSL4|PSMD12|ANKLE2|GMPPA|MYPN|MYLK|LONP1|CYB5R3|KIF14|MAP3K7|NRAS|RARS2|GNAI3|NSDHL|…
Monarch Phenotype	Abnormal blood vessel morphology	0.0158	3031	0.00025	0.180134	HP:0033353	792	40	ACTA2|RRAS2|NOTCH2|MPP5|SLC12A2|CBL|NRP1|CDH2|RASA1|NONO|GNAQ|DNAAF5|MAP2K1|MMP14|MET|RPS15A|PPP2R1A|BGN|PSMD12|EPHB4|CASP8|MYPN|MYLK|MAP3K7|NRAS|CHUK|DPM1|FAT4|ARPC1B|TKT|RPL10|FLNB|PLCB3|PHGDH|RPS7|CTNNB1|RPL11|TPM2|CDC42|TTC37
Monarch Phenotype	Abnormal calvaria morphology	0.0393	3031	0.00086	0.140561	HP:0002683	762	37	EFNB1|SNAP29|PI4KA|NOTCH2|PDGFRB|MAP2K2|ARCN1|CBL|CDH11|CDH2|NONO|INPPL1|MAP2K1|SEC23A|MMP14|UGDH|MPDZ|TUBB3|PPP2R1A|BGN|LONP1|MAP3K7|NRAS|DPM1|IL6ST|FAT4|PPP1R12A|RAB3GAP1|RPL10|PPP2R5D|FLNB|SERPINH1|ACTG1|ADSL|PHGDH|CTNNB1|TTC37
Monarch Phenotype	Abnormal central motor function	0.0037	3031	3.63e-05	0.24318	HP:0011442	1689	75	SNAP29|GALK1|SLC25A11|SLC1A4|PMPCB|PI4KA|MPP5|TAOK1|AARS1|PDGFRB|SLC12A2|SLC9A1|ARCN1|TUBB4A|ACAT1|SCYL1|RASA1|NONO|VPS51|CCT5|ANK3|QDPR|RPIA|GNAQ|CSTB|HPRT1|YWHAG|VPS37A|FMN2|UGDH|TUBB3|TUFM|FTSJ1|RAB11B|EPB41L1|PLCB1|EZR|ACSL4|PARK7|PSMD12|ANKLE2|GMPPA|MYPN|LONP1|CYB5R3|NHLRC2|NRAS|RARS2|DPM1|ADPRHL2|STXBP1|OPTN|ITPA|GIPC1|ASNS|FAT4|TKT|GDI1|ANXA11|DDOST|RAB3GAP1|RPL10|EIF2B1|SLC2A1|GPHN|PPP2R5…
Monarch Phenotype	Abnormal cerebellum morphology	0.0085	3031	0.00012	0.207058	HP:0001317	788	41	AHCY|AIMP2|PMPCB|PI4KA|RRAS2|NOTCH2|MAP2K2|SLC9A1|TUBB4A|SCYL1|NONO|VPS51|GNAQ|TUBB3|PPP2R1A|RAB11B|EXOC7|LONP1|CYB5R3|KIF14|MAP3K7|NRAS|RARS2|DPM1|ADPRHL2|STXBP1|ASNS|FAT4|PPP1R12A|RAB3GAP1|RPL10|EIF2B1|GPHN|DAG1|COASY|ADSL|UBAP1|PHGDH|CASK|CTNNB1|CDC42
Monarch Phenotype	Abnormal cerebral cortex morphology	0.0026	3031	2.3e-05	0.258503	HP:0002538	704	40	SNAP29|PI4KA|MPP5|TAOK1|PDGFRB|SLC12A2|MAP2K2|QDPR|GNAQ|MAP2K1|VPS37A|FMN2|MPDZ|TUBB3|TUFM|EXOC7|EPB41L1|EZR|PSMD12|ANKLE2|LONP1|CYB5R3|KIF14|NRAS|NSDHL|STXBP1|ASNS|FAT4|PPP1R12A|RAB3GAP1|EIF2B1|SLC2A1|GPHN|DAG1|ACTG1|PHGDH|CASK|CTNNB1|CDC42|AMPD2
Monarch Phenotype	Abnormal cerebral morphology	0.0003	3031	1.37e-06	0.352288	HP:0002060	1786	84	EFNB1|SNAP29|AHCY|AIMP2|ACTA2|GALK1|SLC1A4|PMPCB|PI4KA|MPP5|TAOK1|AARS1|PDGFRB|SLC12A2|MAP2K2|ARCN1|TUBB4A|PIK3C2A|CDH11|CDH2|NONO|VPS51|QDPR|RPIA|GNAQ|NRG1|MAP2K1|YWHAG|ACAD9|ITGA3|VPS37A|RPS15A|FMN2|UGDH|MPDZ|TUBB3|TUFM|PPP2R1A|EIF4A2|RAB11B|EXOC7|EPB41L1|EZR|ACSL4|PSMD12|ANKLE2|GMPPA|MYLK|LONP1|CYB5R3|KIF14|NHLRC2|NRAS|RARS2|NSDHL|CHUK|DPM1|ADPRHL2|STXBP1|ITPA|GDI2|SBF1|PICALM|ASNS|FAT4|ABCC1|…
Monarch Phenotype	Abnormal cerebral subcortex morphology	0.0309	3031	0.00062	0.151004	HP:0010993	999	46	EFNB1|SNAP29|AHCY|AIMP2|ACTA2|SLC1A4|MPP5|TAOK1|AARS1|PDGFRB|SLC12A2|MAP2K2|PIK3C2A|CDH2|NONO|VPS51|YWHAG|FMN2|TUBB3|PPP2R1A|EXOC7|EPB41L1|EZR|PSMD12|ANKLE2|LONP1|CYB5R3|KIF14|NHLRC2|NRAS|STXBP1|ASNS|FAT4|PPP1R12A|RAB3GAP1|SLC2A1|PPP2R5D|DAG1|ACTG1|COASY|ADSL|PHGDH|CASK|CTNNB1|CDC42|AMPD2
Monarch Phenotype	Abnormal cerebral vascular morphology	0.0295	3031	0.00058	0.153018	HP:0100659	381	23	SNAP29|SERPINE1|ACTA2|SLC25A11|PIK3C2A|RASA1|GNAQ|NRG1|ACAD9|EIF4A2|BGN|SRGAP1|EPHB4|MYPN|MYLK|LONP1|NRAS|GNAI3|GDI2|PICALM|ABCC1|ACTG1|CTNNB1
Monarch Phenotype	Abnormal cerebral ventricle morphology	0.0091	3031	0.00013	0.204096	HP:0002118	765	40	AHCY|RRAS2|NOTCH2|TAOK1|PDGFRB|MAP2K2|RASA1|VPS51|GNAQ|DNAAF5|MAP2K1|VPS37A|UGDH|MPDZ|TUBB3|PPP2R1A|BGN|EPB41L1|ANKLE2|EPHB4|LONP1|KIF14|NRAS|STXBP1|WASF1|ASNS|FAT4|PPP1R12A|RAB3GAP1|EIF2B1|SLC2A1|PPP2R5D|DAG1|ATP1A1|ACTG1|PHGDH|CASK|CTNNB1|CDC42|AMPD2
Monarch Phenotype	Abnormal cerebral white matter morphology	0.0193	3031	0.00034	0.171444	HP:0002500	914	44	EFNB1|SNAP29|AHCY|AIMP2|ACTA2|SLC1A4|MPP5|TAOK1|AARS1|SLC12A2|MAP2K2|PIK3C2A|CDH2|NONO|VPS51|YWHAG|FMN2|TUBB3|PPP2R1A|EXOC7|EPB41L1|EZR|PSMD12|ANKLE2|LONP1|KIF14|NHLRC2|NRAS|STXBP1|ASNS|FAT4|PPP1R12A|RAB3GAP1|SLC2A1|PPP2R5D|DAG1|ACTG1|COASY|ADSL|PHGDH|CASK|CTNNB1|CDC42|AMPD2
Monarch Phenotype	Abnormal corpus callosum morphology	0.0079	3031	0.00011	0.210237	HP:0001273	784	41	EFNB1|SNAP29|AHCY|AIMP2|SLC1A4|MPP5|TAOK1|AARS1|SLC12A2|MAP2K2|PIK3C2A|CDH2|NONO|VPS51|YWHAG|FMN2|TUBB3|PPP2R1A|EXOC7|EPB41L1|EZR|PSMD12|ANKLE2|LONP1|KIF14|NHLRC2|NRAS|STXBP1|ASNS|FAT4|PPP1R12A|RAB3GAP1|PPP2R5D|DAG1|ACTG1|COASY|PHGDH|CASK|CTNNB1|CDC42|AMPD2
Monarch Phenotype	Abnormal cortical gyration	0.0041	3031	4.58e-05	0.238722	HP:0002536	384	26	SNAP29|PI4KA|TAOK1|SLC12A2|FMN2|MPDZ|TUBB3|TUFM|EXOC7|EPB41L1|EZR|ANKLE2|LONP1|KIF14|NSDHL|STXBP1|ASNS|FAT4|PPP1R12A|RAB3GAP1|EIF2B1|GPHN|DAG1|ACTG1|PHGDH|CASK
Monarch Phenotype	Abnormal digit morphology	0.0058	3031	7.24e-05	0.223657	HP:0011297	1263	59	EFNB1|ACTA2|PI4KA|RRAS2|NOTCH2|MPP5|AARS1|PDGFRB|SLC12A2|ARCN1|CBL|RAB7A|PIK3C2A|CDH11|NONO|VPS51|DNAAF5|INPPL1|RPS15A|TUBB3|PPP2R1A|FTSJ1|BGN|RAB11B|ARHGEF1|ACSL4|PSMD12|ANKLE2|MYLK|LONP1|MAP3K7|NRAS|NSDHL|STXBP1|FGD1|NHS|SBF1|IL6ST|GARS1|WASF1|FAT4|CTNND1|PPP1R12A|GDI1|RHOA|RAB3GAP1|RPL10|SLC2A1|PPP2R5D|FLNB|PLCB3|ACTG1|PHGDH|CASK|RPS7|RPL11|TPM2|EIF4A3|CDC42
Monarch Phenotype	Abnormal ear morphology	0.0142	3031	0.00022	0.184771	HP:0031703	1320	59	SNAP29|RP2|SLC25A11|SLC1A4|RRAS2|NOTCH2|MPP5|SLC12A2|MAP2K2|CBL|PIK3C2A|CDH11|CDH2|EGFR|VPS51|DNAAF5|MAP2K1|ITGA3|VPS37A|RPS15A|UGDH|MPDZ|TUBB3|FTSJ1|RAB11B|EXOC7|PSMD12|LONP1|KIF14|MAP3K7|NRAS|GNAI3|NSDHL|CHUK|FGD1|NHS|IL6ST|ASNS|FAT4|CTNND1|PPP1R12A|RAB3GAP1|RPL10|SLC2A1|PPP2R5D|FLNB|TENM3|DAG1|ACTG1|ADSL|PHGDH|CASK|RPS7|RPL11|TPM2|EIF4A3|CDC42|TTC37|AMPD2
Monarch Phenotype	Abnormal ear physiology	0.0255	3031	0.00048	0.159346	HP:0031704	1362	59	EFNB1|SNAP29|RP2|GALK1|SLC25A11|PMPCB|PI4KA|RRAS2|NOTCH2|MPP5|AARS1|PDGFRB|SLC12A2|CBL|TUBB4A|PIK3C2A|CDH11|GNAQ|DNAAF5|VPS37A|MPDZ|TUBB3|FTSJ1|NEXN|PLS1|ACSL4|PSMD12|AP1B1|GMPPA|TPM1|MYPN|LONP1|MAP3K7|NRAS|GNAI3|NSDHL|ADPRHL2|PIP4K2A|GIPC1|FAT4|CTNND1|MAGI1|TPRN|TKT|GDI1|RPL10|FLNB|TENM3|SERPINH1|ACTG1|WBP2|YAP1|CASK|CTNNB1|RPL11|RDX|TPM2|CDC42|MTHFD1
Monarch Phenotype	Abnormal emotion/affect behavior	0.0177	3031	0.0003	0.175203	HP:0100851	586	32	SLC1A4|TAOK1|ACAT1|CDH2|NONO|ANK3|QDPR|HPRT1|MET|TUBB3|RAB11B|EPB41L1|PARK7|CASP8|NHLRC2|NSDHL|STXBP1|OPTN|ITPA|WASF1|FAT4|TKT|ANXA11|RPL10|EIF2B1|SLC2A1|PPP2R5D|ATP1A1|ADSL|PHGDH|CASK|CTNNB1
Monarch Phenotype	Abnormal external nose morphology	0.0384	3031	0.00083	0.141567	HP:0010938	816	39	EFNB1|SNAP29|RP2|AIMP2|NOTCH2|MPP5|SLC12A2|MAP2K2|PIK3C2A|CDH11|VPS51|INPPL1|MAP2K1|SEC23A|MPDZ|PPP2R1A|FTSJ1|ACSL4|PSMD12|LONP1|KIF14|MAP3K7|NRAS|STXBP1|FGD1|GDI1|RHOA|RAB3GAP1|RPL10|SLC2A1|FLNB|PLCB3|ACTG1|ADSL|PHGDH|CASK|CTNNB1|CDC42|TTC37
Monarch Phenotype	Abnormal eye morphology	0.00031	3031	1.44e-06	0.350864	HP:0012372	2077	94	EFNB1|SNAP29|RP2|ACTA2|GALK1|SLC25A11|SLC1A4|PMPCB|RRAS2|NOTCH2|MPP5|AARS1|PDGFRB|SLC12A2|MAP2K2|ARCN1|CBL|TUBB4A|PIK3C2A|CDH11|CDH2|SCYL1|EGFR|NONO|VPS51|RPIA|FLCN|GNAQ|NRG1|DNAAF5|INPPL1|MAP2K1|CTNNA1|YWHAG|SEC23A|MMP14|ITGA3|RPS15A|UGDH|MPDZ|TUBB3|PPP2R1A|BGN|RAB11B|TUBB4B|PSMD12|AP1B1|GMPPA|EPHA2|MYPN|MYLK|LONP1|CYB5R3|KIF14|MAP3K7|NRAS|RARS2|DPM1|STXBP1|BICC1|FGD1|NHS|ITPA|IL6ST|DNM2|WASF1|F…
Monarch Phenotype	Abnormal eye physiology	3.82e-05	3031	8.46e-08	0.441794	HP:0012373	2405	110	EFNB1|SNAP29|AHCY|RP2|ACTA2|PMPCB|PI4KA|RRAS2|NOTCH2|MPP5|TAOK1|AARS1|PDGFRB|SLC12A2|MAP2K2|SLC9A1|ARCN1|CBL|TUBB4A|PIK3C2A|CDH11|CDH2|SCYL1|EGFR|NONO|VPS51|ANK3|RPIA|GNAQ|NRG1|MAP2K1|YWHAG|SEC23A|DNMBP|RPS15A|FMN2|UGDH|MPDZ|TUBB3|TUFM|PPP2R1A|RAB11B|EPB41L1|EZR|PARK7|TUBB4B|PSMD12|AP1B1|ANKLE2|GMPPA|EPHA2|MYPN|KIRREL1|PTPRF|LONP1|CYB5R3|TSC22D2|KIF14|UTRN|NHLRC2|MAP3K7|NRAS|GNAI3|NSDHL|DPM1|ADPR…
Monarch Phenotype	Abnormal eyelid morphology	0.00021	3031	9.26e-07	0.367778	HP:0000492	1058	58	EFNB1|SNAP29|RRAS2|NOTCH2|MPP5|AARS1|PDGFRB|SLC12A2|MAP2K2|CBL|PIK3C2A|CDH11|CDH2|EGFR|NONO|VPS51|MAP2K1|YWHAG|ITGA3|RPS15A|UGDH|MPDZ|TUBB3|PPP2R1A|FTSJ1|BGN|RAB11B|ACSL4|PSMD12|AP1B1|ANKLE2|LONP1|KIF14|MAP3K7|NRAS|NSDHL|DPM1|STXBP1|FGD1|WASF1|FAT4|CTNND1|PPP1R12A|GDI1|RHOA|RAB3GAP1|RPL10|PPP2R5D|FLNB|TENM3|ACTG1|PHGDH|CASK|RPS7|RPL11|CDC42|TTC37|AMPD2
Monarch Phenotype	Abnormal facial shape	0.0012	3031	7.98e-06	0.292082	HP:0001999	978	52	EFNB1|SNAP29|AHCY|SLC1A4|RRAS2|NOTCH2|MPP5|TAOK1|SLC12A2|MAP2K2|CBL|TUBB4A|PIK3C2A|CDH11|NONO|MAP2K1|MMP14|ITGA3|FMN2|MPDZ|PPP2R1A|RAB11B|EPB41L1|EZR|PSMD12|MYPN|LONP1|MAP3K7|NRAS|GNAI3|NSDHL|STXBP1|FGD1|NHS|FAT4|CTNND1|PPP1R12A|RHOA|RPL10|SLC2A1|PPP2R5D|FLNB|SERPINH1|ITGA7|ACTG1|ADSL|PHGDH|CASK|CTNNB1|TPM2|CDC42|TTC37
Monarch Phenotype	Abnormal facial skeleton morphology	0.0047	3031	5.63e-05	0.23279	HP:0011821	1056	52	AIMP2|ACTA2|PI4KA|RRAS2|NOTCH2|MPP5|PDGFRB|SLC12A2|MAP2K2|ARCN1|CBL|PIK3C2A|CDH11|NONO|DNAAF5|INPPL1|MAP2K1|SEC23A|RPS15A|TUBB3|BGN|EXOC7|PSMD12|ANKLE2|MYPN|MYLK|KIF14|MAP3K7|NRAS|GNAI3|NSDHL|CHUK|DPM1|FGD1|NHS|ASNS|FAT4|PPP1R12A|RHOA|RAB3GAP1|RPL10|FLNB|SERPINH1|ITGA7|ACTG1|COASY|PHGDH|CASK|RPS7|RPL11|TPM2|EIF4A3
Monarch Phenotype	Abnormal foot morphology	0.00014	3031	5.94e-07	0.385387	HP:0001760	1253	66	EFNB1|SNAP29|AHCY|ACTA2|PI4KA|NOTCH2|MPP5|AARS1|PDGFRB|SLC12A2|MAP2K2|ARCN1|RAB7A|SCYL1|NONO|CCT5|INPPL1|HPRT1|MAP2K1|SEC23A|MMP14|TUBB3|PPP2R1A|FTSJ1|BGN|RAB11B|NEXN|EXOC7|ARHGEF1|ACSL4|CTSB|PSMD12|GMPPA|TPM1|MYPN|MYLK|LONP1|KIF14|MAP3K7|NRAS|NSDHL|STXBP1|YARS1|FGD1|SBF1|DNM2|GARS1|WASF1|ASNS|FAT4|GDI1|RHOA|RAB3GAP1|RPL10|PPP2R5D|FLNB|DAG1|ATP1A1|ITGA7|COASY|UBAP1|PHGDH|CASK|TPM2|EIF4A3|CDC42
Monarch Phenotype	Abnormal hair pattern	0.0037	3031	3.67e-05	0.24318	HP:0010720	290	22	EFNB1|RRAS2|NOTCH2|MPP5|SLC12A2|MAP2K2|CBL|PIK3C2A|CDH2|VPS51|MAP2K1|RPS15A|PPP2R1A|PSMD12|MAP3K7|NRAS|FGD1|RAB3GAP1|SLC2A1|ACTG1|RPS7|RPL11
Monarch Phenotype	Abnormal hand morphology	0.0377	3031	0.0008	0.142366	HP:0005922	870	41	EFNB1|PI4KA|RRAS2|NOTCH2|MPP5|PDGFRB|SLC12A2|CBL|PIK3C2A|NONO|CCT5|INPPL1|MMP14|RPS15A|TUBB3|PPP2R1A|FTSJ1|BGN|ACSL4|PSMD12|LONP1|MAP3K7|NRAS|DPM1|STXBP1|FGD1|NHS|ASNS|FAT4|GDI1|RAB3GAP1|RPL10|FLNB|ACTG1|PHGDH|CASK|RPS7|RPL11|TPM2|EIF4A3|CDC42
Monarch Phenotype	Abnormal heart valve physiology	0.0496	3031	0.0011	0.130452	HP:0031653	256	17	ACTA2|RRAS2|NOTCH2|MAP2K2|CBL|CDH2|NONO|MAP2K1|BGN|TPM1|MYPN|MYLK|MAP3K7|NRAS|FAT4|CDC42|TTC37
Monarch Phenotype	Abnormal jaw morphology	0.004	3031	4.35e-05	0.239794	HP:0030791	883	46	AIMP2|ACTA2|PI4KA|RRAS2|NOTCH2|MPP5|PDGFRB|SLC12A2|ARCN1|CBL|PIK3C2A|CDH11|SEC23A|RPS15A|TUBB3|BGN|EXOC7|PSMD12|ANKLE2|MYPN|MYLK|KIF14|MAP3K7|NRAS|GNAI3|NSDHL|CHUK|DPM1|FGD1|NHS|ASNS|FAT4|PPP1R12A|RAB3GAP1|RPL10|FLNB|SERPINH1|ITGA7|ACTG1|COASY|PHGDH|CASK|RPS7|RPL11|TPM2|EIF4A3
Monarch Phenotype	Abnormal joint morphology	0.0417	3031	0.00092	0.137986	HP:0001367	905	42	EFNB1|SERPINE1|RRAS2|NOTCH2|AARS1|PDGFRB|SLC12A2|MAP2K2|CBL|PIK3C2A|NONO|INPPL1|HPRT1|MAP2K1|MMP14|TUBB3|BGN|ANKLE2|LONP1|MAP3K7|NRAS|NSDHL|DPM1|STXBP1|FGD1|IL6ST|WASF1|FAT4|RAB3GAP1|RPL10|GPHN|PPP2R5D|FLNB|SERPINH1|DAG1|ITGA7|ACTG1|UBAP1|PHGDH|TPM2|EIF4A3|MTHFD1
Monarch Phenotype	Abnormal lateral ventricle morphology	0.0108	3031	0.00016	0.196658	HP:0030047	98	11	TAOK1|MAP2K2|VPS51|MPDZ|TUBB3|EPB41L1|LONP1|STXBP1|PPP1R12A|EIF2B1|PPP2R5D
Monarch Phenotype	Abnormal lip morphology	0.00011	3031	4.06e-07	0.395861	HP:0000159	878	52	EFNB1|RRAS2|NOTCH2|MPP5|PDGFRB|SLC12A2|MAP2K2|CBL|CDH11|CDH2|EGFR|NONO|VPS51|INPPL1|MAP2K1|SEC23A|UGDH|PPP2R1A|FTSJ1|RAB11B|EXOC7|ACSL4|PSMD12|ANKLE2|LONP1|CYB5R3|KIF14|MAP3K7|NRAS|NSDHL|DPM1|FGD1|FAT4|CTNND1|PPP1R12A|GDI1|RAB3GAP1|RPL10|SLC2A1|PPP2R5D|FLNB|TENM3|ACTG1|YAP1|ADSL|PHGDH|CASK|RPS7|CTNNB1|CDC42|TTC37|AMPD2
Monarch Phenotype	Abnormal location of ears	0.0233	3031	0.00043	0.163264	HP:0000357	679	35	SLC1A4|RRAS2|NOTCH2|SLC12A2|MAP2K2|CBL|CDH11|CDH2|MAP2K1|RPS15A|MPDZ|TUBB3|EXOC7|PSMD12|KIF14|MAP3K7|NRAS|GNAI3|NSDHL|FGD1|FAT4|PPP1R12A|RAB3GAP1|RPL10|PPP2R5D|FLNB|TENM3|DAG1|ADSL|RPS7|RPL11|TPM2|EIF4A3|CDC42|TTC37
Monarch Phenotype	Abnormal mandible morphology	0.0085	3031	0.00012	0.207058	HP:0000277	841	43	AIMP2|ACTA2|PI4KA|RRAS2|NOTCH2|MPP5|PDGFRB|SLC12A2|ARCN1|CBL|PIK3C2A|CDH11|RPS15A|TUBB3|EXOC7|PSMD12|ANKLE2|MYPN|MYLK|KIF14|MAP3K7|NRAS|GNAI3|NSDHL|CHUK|DPM1|NHS|ASNS|FAT4|PPP1R12A|RAB3GAP1|RPL10|FLNB|SERPINH1|ITGA7|ACTG1|COASY|PHGDH|CASK|RPS7|RPL11|TPM2|EIF4A3
Monarch Phenotype	Abnormal midface morphology	0.0104	3031	0.00015	0.198297	HP:0000309	488	29	RRAS2|NOTCH2|PDGFRB|MAP2K2|CBL|TUBB4A|CDH11|NONO|INPPL1|MAP2K1|SEC23A|FTSJ1|BGN|ACSL4|MAP3K7|NRAS|GNAI3|NSDHL|WASF1|FAT4|GDI1|RHOA|RAB3GAP1|PPP2R5D|FLNB|SERPINH1|ACTG1|CDC42|AMPD2
Monarch Phenotype	Abnormal morphology of the great vessels	0.0221	3031	0.0004	0.165561	HP:0030962	571	31	ACTA2|RRAS2|NOTCH2|MPP5|SLC12A2|CBL|NRP1|CDH2|NONO|DNAAF5|MMP14|RPS15A|PPP2R1A|BGN|PSMD12|MYPN|MYLK|MAP3K7|NRAS|CHUK|DPM1|TKT|RPL10|FLNB|PLCB3|PHGDH|RPS7|RPL11|TPM2|CDC42|TTC37
Monarch Phenotype	Abnormal muscle physiology	2.55e-05	3031	4.59e-08	0.459346	HP:0011804	2088	100	EFNB1|SNAP29|AHCY|SLC1A4|PMPCB|PI4KA|RRAS2|MPP5|TAOK1|AARS1|SLC12A2|MAP2K2|CBL|TUBB4A|RAB7A|TNPO3|ACAT1|CDH2|SCYL1|RASA1|NONO|VPS51|CCT5|ANK3|QDPR|RPIA|INPPL1|HPRT1|MAP2K1|YWHAG|ACAD9|ITGA3|VPS37A|FMN2|UGDH|TUBB3|TUFM|ENO3|PPP2R1A|FTSJ1|RAB11B|NEXN|EPB41L1|PLCB1|EZR|ACSL4|PARK7|PSMD12|AP1B1|ANKLE2|EPHB4|GMPPA|TPM1|MYPN|LONP1|CYB5R3|KIF14|NHLRC2|NRAS|RARS2|GNAI3|NSDHL|DPM1|ADPRHL2|STXBP1|YARS1|OPT…
Monarch Phenotype	Abnormal muscle tone	0.00014	3031	5.52e-07	0.385387	HP:0003808	1773	85	EFNB1|SNAP29|AHCY|SLC1A4|PMPCB|PI4KA|RRAS2|MPP5|TAOK1|AARS1|SLC12A2|MAP2K2|CBL|TUBB4A|ACAT1|CDH2|SCYL1|NONO|VPS51|CCT5|ANK3|QDPR|RPIA|INPPL1|HPRT1|MAP2K1|YWHAG|ACAD9|ITGA3|VPS37A|FMN2|UGDH|TUBB3|TUFM|PPP2R1A|RAB11B|EPB41L1|PLCB1|EZR|PARK7|PSMD12|AP1B1|ANKLE2|GMPPA|MYPN|LONP1|CYB5R3|KIF14|NHLRC2|NRAS|RARS2|GNAI3|NSDHL|DPM1|STXBP1|OPTN|ITPA|DNM2|GARS1|WASF1|ASNS|FAT4|TKT|GDI1|ANXA11|DDOST|RAB3GAP1|…
Monarch Phenotype	Abnormal musculoskeletal physiology	0.0019	3031	1.48e-05	0.272125	HP:0011843	1330	64	EFNB1|AIMP2|SLC1A4|PI4KA|RRAS2|NOTCH2|MPP5|PDGFRB|SLC12A2|ARCN1|CBL|RAB7A|TNPO3|PIK3C2A|RASA1|NONO|CCT5|INPPL1|MAP2K1|SEC23A|MMP14|MET|VPS37A|TUBB3|PPP2R1A|BGN|EXOC7|PSMD12|ANKLE2|CASP8|MYPN|LONP1|KIF14|MAP3K7|NRAS|GNAI3|NSDHL|DPM1|STXBP1|FGD1|IL6ST|DNM2|GARS1|WASF1|FAT4|PPP1R12A|DDOST|RAB3GAP1|RPL10|EIF2B1|GPHN|PPP2R5D|FLNB|SERPINH1|DAG1|ITGA7|ACTG1|COASY|PIP5K1C|PHGDH|MTAP|CTNNB1|TPM2|CDC42
Monarch Phenotype	Abnormal nasal bridge morphology	0.0051	3031	6.22e-05	0.229243	HP:0000422	897	46	EFNB1|SNAP29|RP2|SLC1A4|NOTCH2|MPP5|PDGFRB|SLC12A2|MAP2K2|CBL|PIK3C2A|CDH11|CDH2|NONO|INPPL1|MAP2K1|SEC23A|RPS15A|FTSJ1|ACSL4|PSMD12|LONP1|KIF14|MAP3K7|NRAS|RARS2|NSDHL|DPM1|STXBP1|FGD1|NHS|FAT4|GDI1|RHOA|RAB3GAP1|RPL10|SLC2A1|FLNB|PLCB3|ACTG1|CASK|RPS7|RPL11|TPM2|CDC42|TTC37
Monarch Phenotype	Abnormal nasal morphology	0.0068	3031	8.97e-05	0.216749	HP:0005105	1245	58	EFNB1|SNAP29|RP2|AIMP2|SLC1A4|NOTCH2|MPP5|PDGFRB|SLC12A2|MAP2K2|CBL|PIK3C2A|CDH11|CDH2|NONO|VPS51|DNAAF5|INPPL1|MAP2K1|SEC23A|ITGA3|RPS15A|MPDZ|PPP2R1A|FTSJ1|ACSL4|PSMD12|LONP1|KIF14|MAP3K7|NRAS|RARS2|NSDHL|DPM1|STXBP1|FGD1|NHS|FAT4|PPP1R12A|GDI1|RHOA|RAB3GAP1|RPL10|SLC2A1|PPP2R5D|FLNB|PLCB3|ACTG1|ADSL|PHGDH|CASK|RPS7|CTNNB1|RPL11|TPM2|EIF4A3|CDC42|TTC37
Monarch Phenotype	Abnormal neck morphology	0.0162	3031	0.00027	0.179048	HP:0025668	481	28	EFNB1|RRAS2|NOTCH2|MAP2K2|CBL|TUBB4A|PIK3C2A|CDH11|CDH2|VPS51|INPPL1|MAP2K1|RPS15A|TUBB3|MAP3K7|NRAS|FGD1|RAB3GAP1|RPL10|SLC2A1|PPP2R5D|FLNB|ACTG1|PHGDH|RPS7|RPL11|TPM2|CDC42
Monarch Phenotype	Abnormal nervous system electrophysiology	0.0384	3031	0.00082	0.141567	HP:0001311	545	29	SNAP29|AIMP2|SLC1A4|PI4KA|AARS1|SLC12A2|MAP2K2|RAB7A|CCT5|CSTB|MAP2K1|YWHAG|FMN2|UGDH|PLCB1|EZR|LONP1|NRAS|DPM1|STXBP1|SBF1|DNM2|GARS1|ASNS|RPL10|SLC2A1|DAG1|PHGDH|CASK
Monarch Phenotype	Abnormal nervous system morphology	4.86e-05	3031	1.35e-07	0.431336	HP:0012639	2546	114	EFNB1|SNAP29|AHCY|AIMP2|SERPINE1|ACTA2|GALK1|SLC25A11|SLC1A4|PMPCB|PI4KA|RRAS2|NOTCH2|MPP5|TAOK1|AARS1|PDGFRB|SLC12A2|MAP2K2|SLC9A1|ARCN1|TUBB4A|RAB7A|PIK3C2A|CDH11|CDH2|SCYL1|RASA1|NONO|VPS51|CCT5|QDPR|RPIA|GNAQ|NRG1|DNAAF5|MAP2K1|YWHAG|ACAD9|ITGA3|VPS37A|RPS15A|FMN2|UGDH|MPDZ|TUBB3|TUFM|PPP2R1A|EIF4A2|FTSJ1|BGN|RAB11B|EXOC7|EPB41L1|EZR|ACSL4|PSMD12|ANKLE2|EPHB4|GMPPA|MYPN|MYLK|LONP1|CYB5R3|KIF1…
Monarch Phenotype	Abnormal nervous system physiology	3.82e-05	3031	8.62e-08	0.441794	HP:0012638	3154	135	EFNB1|SNAP29|AHCY|RP2|AIMP2|GALK1|SLC25A11|SLC1A4|PMPCB|NECTIN2|PI4KA|RRAS2|NOTCH2|MPP5|TAOK1|AARS1|PDGFRB|SLC12A2|MAP2K2|SLC9A1|ARCN1|CBL|TUBB4A|RAB7A|TNPO3|ACAT1|PIK3C2A|CDH11|CDH2|SCYL1|RASA1|NONO|VPS51|CCT5|ANK3|QDPR|RPIA|GNAQ|MYO1E|CSTB|DNAAF5|HPRT1|DIP2B|MAP2K1|YWHAG|SEC23A|MMP14|ACAD9|MET|VPS37A|RPS15A|FMN2|UGDH|MPDZ|TUBB3|TUFM|PPP2R1A|FTSJ1|RAB11B|EXOC7|EPB41L1|PLCB1|EZR|ACSL4|PARK7|PSMD1…
Monarch Phenotype	Abnormal ocular adnexa morphology	0.0012	3031	7.55e-06	0.292082	HP:0030669	1218	61	EFNB1|SNAP29|SLC1A4|RRAS2|NOTCH2|MPP5|AARS1|PDGFRB|SLC12A2|MAP2K2|CBL|PIK3C2A|CDH11|CDH2|EGFR|NONO|VPS51|GNAQ|MAP2K1|YWHAG|ITGA3|RPS15A|UGDH|MPDZ|TUBB3|PPP2R1A|FTSJ1|BGN|RAB11B|ACSL4|PSMD12|AP1B1|ANKLE2|LONP1|KIF14|MAP3K7|NRAS|NSDHL|DPM1|STXBP1|FGD1|WASF1|FAT4|CTNND1|PPP1R12A|TKT|GDI1|RHOA|RAB3GAP1|RPL10|PPP2R5D|FLNB|TENM3|ACTG1|PHGDH|CASK|RPS7|RPL11|CDC42|TTC37|AMPD2
Monarch Phenotype	Abnormal oral cavity morphology	4.34e-05	3031	1.14e-07	0.436251	HP:0000163	1901	92	EFNB1|SNAP29|AHCY|AIMP2|ACTA2|PI4KA|RRAS2|NOTCH2|MPP5|AARS1|PDGFRB|SLC12A2|MAP2K2|ARCN1|CBL|TUBB4A|PIK3C2A|CDH11|CDH2|EGFR|NONO|VPS51|ANK3|GNAQ|NRG1|CSTB|INPPL1|MAP2K1|YWHAG|SEC23A|ITGA3|RPS15A|UGDH|TUBB3|PPP2R1A|FTSJ1|BGN|RAB11B|EXOC7|ACSL4|DLG1|FILIP1L|PSMD12|ANKLE2|MYPN|MYLK|LONP1|CYB5R3|PTPN14|KIF14|MAP3K7|NRAS|RARS2|GNAI3|NSDHL|CHUK|DPM1|ADPRHL2|STXBP1|FGD1|OPTN|NHS|IL6ST|GIPC1|FAT4|CTNND1|P…
Monarch Phenotype	Abnormal oral physiology	0.0127	3031	0.00019	0.18962	HP:0031815	196	16	SERPINE1|PI4KA|SLC12A2|NONO|QDPR|TUBB3|FTSJ1|ACSL4|GNAI3|STXBP1|OPTN|GDI1|ANXA11|PPP2R5D|ITGA7|TPM2
Monarch Phenotype	Abnormal palate morphology	0.00074	3031	4.37e-06	0.313077	HP:0000174	1035	55	EFNB1|ACTA2|RRAS2|NOTCH2|MPP5|SLC12A2|MAP2K2|ARCN1|CBL|CDH11|CDH2|NONO|VPS51|ANK3|NRG1|INPPL1|MAP2K1|SEC23A|RPS15A|TUBB3|BGN|EXOC7|DLG1|FILIP1L|PSMD12|MYPN|MYLK|PTPN14|KIF14|MAP3K7|NRAS|RARS2|GNAI3|NSDHL|DPM1|STXBP1|FGD1|GIPC1|FAT4|CTNND1|PHLDB2|RAB3GAP1|PPP2R5D|FLNB|DAG1|ITGA7|YAP1|PHGDH|CASK|RPS7|CTNNB1|RPL11|TPM2|EIF4A3|TTC37
Monarch Phenotype	Abnormal pinna morphology	0.004	3031	4.49e-05	0.239794	HP:0000377	1019	51	SNAP29|SLC1A4|RRAS2|NOTCH2|MPP5|SLC12A2|MAP2K2|CBL|CDH11|CDH2|VPS51|MAP2K1|ITGA3|RPS15A|UGDH|MPDZ|TUBB3|FTSJ1|RAB11B|EXOC7|PSMD12|LONP1|KIF14|MAP3K7|NRAS|GNAI3|NSDHL|CHUK|FGD1|NHS|ASNS|FAT4|PPP1R12A|RAB3GAP1|RPL10|SLC2A1|PPP2R5D|FLNB|TENM3|DAG1|ACTG1|ADSL|PHGDH|CASK|RPS7|RPL11|TPM2|EIF4A3|CDC42|TTC37|AMPD2
Monarch Phenotype	Abnormal reflex	0.0107	3031	0.00016	0.197062	HP:0031826	1046	50	SNAP29|RP2|SLC1A4|PI4KA|AARS1|SLC12A2|RAB7A|ACAT1|SCYL1|NONO|CCT5|GNAQ|HPRT1|YWHAG|VPS37A|UGDH|TUBB3|FTSJ1|PLCB1|ACSL4|PARK7|ANKLE2|GMPPA|MYPN|KIF14|NRAS|RARS2|DPM1|ADPRHL2|STXBP1|SBF1|DNM2|GARS1|GIPC1|ASNS|GDI1|RAB3GAP1|EIF2B1|SLC2A1|GPHN|PPP2R5D|DAG1|ATP1A1|ITGA7|COASY|ADSL|UBAP1|CASK|TPM2|AMPD2
Monarch Phenotype	Abnormal reproductive system morphology	0.0499	3031	0.0011	0.13019	HP:0012243	1117	49	EFNB1|RP2|ACTA2|RRAS2|NOTCH2|MPP5|SLC12A2|MAP2K2|ARCN1|CBL|PIK3C2A|CDH11|CDH2|NONO|FLCN|BAX|INPPL1|HPRT1|MAP2K1|SEC23A|MMP14|RPS15A|PPP2R1A|PSMD12|ANKLE2|MYLK|LONP1|KIF14|MAP3K7|NRAS|CHUK|STXBP1|FGD1|DNM2|FAT4|PPP1R12A|RAB3GAP1|RPL10|EIF2B1|FLNB|DAG1|PHGDH|CASK|RPS7|CTNNB1|RPL11|TPM2|CDC42|TTC37
Monarch Phenotype	Abnormal skeletal morphology	2.39e-05	3031	3.91e-08	0.46216	HP:0011842	2573	117	EFNB1|SNAP29|AHCY|AIMP2|SERPINE1|ACTA2|GALK1|SLC1A4|PMPCB|PI4KA|RRAS2|NOTCH2|MPP5|TAOK1|AARS1|PDGFRB|SLC12A2|MAP2K2|ARCN1|CBL|TUBB4A|RAB7A|TNPO3|PIK3C2A|CDH11|CDH2|RASA1|NONO|VPS51|ANK3|QDPR|GNAQ|DNAAF5|INPPL1|HPRT1|MAP2K1|YWHAG|SEC23A|MMP14|ITGA3|MET|VPS37A|RPS15A|FMN2|UGDH|MPDZ|TUBB3|TUFM|PPP2R1A|FTSJ1|BGN|RAB11B|EXOC7|EPB41L1|ARHGEF1|EZR|ACSL4|PSMD12|ANKLE2|GMPPA|MYPN|MYLK|LONP1|CYB5R3|KIF14|M…
Monarch Phenotype	Abnormal skeletal muscle morphology	0.00087	3031	5.38e-06	0.306048	HP:0011805	1537	73	EFNB1|AHCY|AIMP2|SERPINE1|SLC1A4|PI4KA|RRAS2|AARS1|CBL|TUBB4A|RAB7A|TNPO3|PIK3C2A|SCYL1|RASA1|CCT5|MAP2K1|YWHAG|ACAD9|VPS37A|RPS15A|TUBB3|ENO3|PPP2R1A|FTSJ1|BGN|RAB11B|NEXN|EXOC7|ACSL4|ANKLE2|EPHB4|GMPPA|TPM1|MYPN|LONP1|KIF14|MAP3K7|NRAS|NSDHL|CHUK|DPM1|STXBP1|YARS1|FGD1|OPTN|SBF1|IL6ST|DNM2|GARS1|GIPC1|ASNS|FAT4|GDI1|ANXA11|RPL10|EIF2B1|PPP2R5D|FLNB|DAG1|ATP1A1|ITGA7|COASY|PIP5K1C|ADSL|UBAP1|PHG…
Monarch Phenotype	Abnormal skull morphology	5.47e-06	3031	3.62e-09	0.526201	HP:0000929	1954	99	EFNB1|SNAP29|AHCY|AIMP2|ACTA2|GALK1|SLC1A4|PMPCB|PI4KA|RRAS2|NOTCH2|MPP5|TAOK1|AARS1|PDGFRB|SLC12A2|MAP2K2|ARCN1|CBL|TUBB4A|PIK3C2A|CDH11|CDH2|NONO|VPS51|ANK3|QDPR|GNAQ|DNAAF5|INPPL1|MAP2K1|YWHAG|SEC23A|MMP14|ITGA3|VPS37A|RPS15A|FMN2|UGDH|MPDZ|TUBB3|TUFM|PPP2R1A|FTSJ1|BGN|RAB11B|EXOC7|EPB41L1|EZR|ACSL4|PSMD12|ANKLE2|GMPPA|MYPN|MYLK|LONP1|CYB5R3|KIF14|MAP3K7|NRAS|RARS2|GNAI3|NSDHL|CHUK|DPM1|STXBP1…
Monarch Phenotype	Abnormal sternum morphology	0.0021	3031	1.8e-05	0.267778	HP:0000766	362	26	EFNB1|ACTA2|PI4KA|RRAS2|NOTCH2|SLC12A2|MAP2K2|CBL|PIK3C2A|CDH11|INPPL1|MAP2K1|MET|VPS37A|PPP2R1A|BGN|MYPN|MYLK|MAP3K7|NRAS|FGD1|RAB3GAP1|FLNB|ITGA7|TPM2|CDC42
Monarch Phenotype	Abnormal subarachnoid space morphology	0.0127	3031	0.00019	0.18962	HP:0012703	118	12	AHCY|ACTA2|TAOK1|CDH2|RASA1|FTSJ1|EPB41L1|ACSL4|MYLK|STXBP1|GDI1|EIF2B1
Monarch Phenotype	Abnormal thorax morphology	0.00065	3031	3.31e-06	0.318709	HP:0000765	743	44	EFNB1|ACTA2|PI4KA|RRAS2|NOTCH2|MPP5|PDGFRB|SLC12A2|MAP2K2|CBL|TNPO3|PIK3C2A|CDH11|CDH2|INPPL1|MAP2K1|SEC23A|MMP14|ITGA3|MET|VPS37A|RPS15A|TUBB3|PPP2R1A|BGN|PSMD12|MYPN|MYLK|MAP3K7|NRAS|NSDHL|FGD1|DNM2|FAT4|RAB3GAP1|SLC2A1|FLNB|SERPINH1|PLCB3|ITGA7|RPS7|RPL11|TPM2|CDC42
Monarch Phenotype	Abnormal upper lip morphology	1.33e-05	3031	1.74e-08	0.487615	HP:0000177	720	49	EFNB1|NOTCH2|MPP5|PDGFRB|SLC12A2|MAP2K2|CBL|CDH11|CDH2|NONO|VPS51|INPPL1|MAP2K1|SEC23A|UGDH|PPP2R1A|FTSJ1|RAB11B|EXOC7|ACSL4|PSMD12|ANKLE2|LONP1|KIF14|MAP3K7|NRAS|NSDHL|DPM1|FGD1|FAT4|CTNND1|PPP1R12A|GDI1|RAB3GAP1|RPL10|SLC2A1|PPP2R5D|FLNB|TENM3|ACTG1|YAP1|ADSL|PHGDH|CASK|RPS7|CTNNB1|CDC42|TTC37|AMPD2
Monarch Phenotype	Abnormal vascular morphology	0.0019	3031	1.43e-05	0.272125	HP:0025015	1027	53	SNAP29|SERPINE1|ACTA2|SLC25A11|RRAS2|NOTCH2|MPP5|SLC12A2|CBL|NRP1|PIK3C2A|CDH2|RASA1|NONO|GNAQ|NRG1|DNAAF5|MAP2K1|MMP14|ACAD9|MET|RPS15A|PPP2R1A|EIF4A2|BGN|PSMD12|EPHB4|CASP8|MYPN|MYLK|LONP1|MAP3K7|NRAS|GNAI3|CHUK|DPM1|GDI2|PICALM|FAT4|ABCC1|ARPC1B|TKT|RPL10|FLNB|PLCB3|ACTG1|PHGDH|RPS7|CTNNB1|RPL11|TPM2|CDC42|TTC37
Monarch Phenotype	Abnormality of body height	0.0021	3031	1.71e-05	0.267778	HP:0000002	1253	61	EFNB1|SNAP29|AIMP2|ACTA2|RRAS2|NOTCH2|MPP5|TAOK1|AARS1|PDGFRB|SLC12A2|MAP2K2|SLC9A1|ARCN1|CBL|TUBB4A|PIK3C2A|NONO|INPPL1|HPRT1|MAP2K1|YWHAG|SEC23A|RPS15A|BGN|EPB41L1|PSMD12|AP1B1|ANKLE2|GMPPA|CASP8|MYPN|MYLK|LONP1|KIF14|MAP3K7|NRAS|NSDHL|STXBP1|FGD1|GARS1|FAT4|TKT|DDOST|RAB3GAP1|RPL10|SLC2A1|FLNB|SERPINH1|PLCB3|ACTG1|PHGDH|CASK|RPS7|CTNNB1|RPL11|TPM2|EIF4A3|TTC37|AMPD2|JAK1
Monarch Phenotype	Abnormality of body weight	0.0384	3031	0.00082	0.141567	HP:0004323	1513	63	SNAP29|AHCY|RP2|GALK1|SLC25A11|PMPCB|NOTCH2|MPP5|AARS1|SLC12A2|MAP2K2|ARCN1|CBL|TUBB4A|ACAT1|PIK3C2A|NONO|VPS51|ANK3|MAP2K1|YWHAG|ACAD9|MET|VPS37A|RPS15A|TUBB3|FTSJ1|ACSL4|PSMD12|AP1B1|ANKLE2|CASP8|MYPN|LONP1|CYB5R3|NHLRC2|MAP3K7|RARS2|NSDHL|DPM1|STXBP1|FGD1|DNM2|GIPC1|ASNS|ARPC1B|GDI1|DDOST|RAB3GAP1|SLC2A1|TJP2|ITGA7|ACTG1|PHGDH|CASK|RPS7|CTNNB1|RPL11|TPM2|CDC42|TTC37|AMPD2|JAK1
Monarch Phenotype	Abnormality of brain morphology	7.58e-05	3031	2.55e-07	0.412033	HP:0012443	2254	103	EFNB1|SNAP29|AHCY|AIMP2|SERPINE1|ACTA2|GALK1|SLC25A11|SLC1A4|PMPCB|PI4KA|RRAS2|NOTCH2|MPP5|TAOK1|AARS1|PDGFRB|SLC12A2|MAP2K2|SLC9A1|ARCN1|TUBB4A|PIK3C2A|CDH11|CDH2|SCYL1|RASA1|NONO|VPS51|QDPR|RPIA|GNAQ|NRG1|DNAAF5|MAP2K1|YWHAG|ACAD9|ITGA3|VPS37A|RPS15A|FMN2|UGDH|MPDZ|TUBB3|TUFM|PPP2R1A|EIF4A2|BGN|RAB11B|EXOC7|EPB41L1|EZR|ACSL4|SRGAP1|PSMD12|ANKLE2|EPHB4|GMPPA|MYPN|MYLK|LONP1|CYB5R3|KIF14|NHLRC2|M…
Monarch Phenotype	Abnormality of cardiovascular system morphology	0.0104	3031	0.00015	0.198297	HP:0030680	1680	72	SNAP29|AHCY|SERPINE1|ACTA2|SLC25A11|RRAS2|NOTCH2|MPP5|SLC12A2|MAP2K2|ARCN1|CBL|NRP1|PIK3C2A|CDH2|RASA1|EGFR|NONO|GNAQ|NRG1|DNAAF5|MAP2K1|MMP14|ACAD9|MET|RPS15A|FMN2|PPP2R1A|EIF4A2|BGN|NEXN|SRGAP1|PSMD12|EPHB4|TPM1|CASP8|MYPN|MYLK|LONP1|PTPN14|NHLRC2|MAP3K7|NRAS|GNAI3|NSDHL|CHUK|DPM1|STK4|STXBP1|FGD1|ITPA|GDI2|PICALM|FAT4|ABCC1|ARPC1B|TKT|RAB3GAP1|RPL10|PPP2R5D|FLNB|PLCB3|ITGA7|ACTG1|PHGDH|CASK|RP…
Monarch Phenotype	Abnormality of digestive system physiology	0.00012	3031	4.41e-07	0.392082	HP:0025032	1763	85	AIMP2|SERPINE1|ACTA2|GALK1|SLC25A11|SLC1A4|PMPCB|PI4KA|RRAS2|MPP5|TAOK1|AARS1|PDGFRB|SLC12A2|MAP2K2|ARCN1|CBL|TUBB4A|ACAT1|SCYL1|EGFR|NONO|VPS51|QDPR|GNAQ|INPPL1|HPRT1|MAP2K1|BCR|YWHAG|SEC23A|ACAD9|MET|FMN2|UGDH|TUBB3|PPP2R1A|RAB11B|EPB41L1|EZR|PARK7|PSMD12|AP1B1|EPHB4|GMPPA|CASP8|MYPN|MYLK|LONP1|NHLRC2|MAP3K7|NRAS|RARS2|GNAI3|CMPK1|STXBP1|APRT|OPTN|ITPA|IL6ST|WASF1|GIPC1|ASNS|FAT4|BLVRA|ARPC1B|A…
Monarch Phenotype	Abnormality of eye movement	0.0087	3031	0.00012	0.206048	HP:0000496	1491	66	EFNB1|SNAP29|AHCY|RP2|PI4KA|RRAS2|MPP5|AARS1|PDGFRB|SLC12A2|MAP2K2|SLC9A1|CBL|TUBB4A|CDH11|CDH2|SCYL1|NONO|VPS51|RPIA|GNAQ|MAP2K1|YWHAG|SEC23A|DNMBP|RPS15A|MPDZ|TUBB3|TUFM|RAB11B|PSMD12|GMPPA|LONP1|CYB5R3|KIF14|NHLRC2|MAP3K7|NRAS|NSDHL|DPM1|ADPRHL2|STXBP1|FGD1|NHS|SBF1|DNM2|WASF1|GIPC1|PPP1R12A|DDOST|RHOA|RPL10|SLC2A1|PPP2R5D|TENM3|ITGA7|YAP1|ADSL|UBAP1|PHGDH|CASK|RPS7|CTNNB1|RPL11|TPM2|CDC42
Monarch Phenotype	Abnormality of globe location	0.00014	3031	5.79e-07	0.385387	HP:0100886	839	50	EFNB1|SNAP29|ACTA2|SLC1A4|RRAS2|NOTCH2|MPP5|PDGFRB|SLC12A2|MAP2K2|ARCN1|CBL|CDH11|CDH2|NONO|VPS51|INPPL1|MAP2K1|SEC23A|ITGA3|RPS15A|UGDH|PPP2R1A|BGN|PSMD12|MYPN|MYLK|MAP3K7|NRAS|RARS2|DPM1|FGD1|WASF1|FAT4|CTNND1|PPP1R12A|RAB3GAP1|PPP2R5D|FLNB|TENM3|SERPINH1|PLCB3|ACTG1|PHGDH|CASK|RPS7|RPL11|TPM2|CDC42|TTC37
Monarch Phenotype	Abnormality of hair texture	0.0373	3031	0.00078	0.142829	HP:0010719	160	13	EFNB1|AHCY|RRAS2|NOTCH2|MAP2K2|CBL|CSTB|MAP2K1|SEC23A|ITGA3|NRAS|PHGDH|TTC37
Monarch Phenotype	Abnormality of higher mental function	0.00066	3031	3.5e-06	0.318046	HP:0011446	2301	100	EFNB1|SNAP29|AHCY|RP2|AIMP2|GALK1|SLC25A11|SLC1A4|PMPCB|NECTIN2|PI4KA|RRAS2|MPP5|TAOK1|AARS1|PDGFRB|SLC12A2|MAP2K2|SLC9A1|ARCN1|CBL|TUBB4A|ACAT1|PIK3C2A|CDH11|CDH2|SCYL1|NONO|ANK3|QDPR|RPIA|GNAQ|CSTB|DNAAF5|HPRT1|DIP2B|MAP2K1|YWHAG|SEC23A|MMP14|VPS37A|RPS15A|FMN2|MPDZ|TUBB3|PPP2R1A|FTSJ1|RAB11B|EPB41L1|EZR|ACSL4|PARK7|PSMD12|AP1B1|ANKLE2|GMPPA|LONP1|CYB5R3|KIF14|MAP3K7|NRAS|RARS2|NSDHL|ADPRHL2|ST…
Monarch Phenotype	Abnormality of joint mobility	0.0014	3031	9.12e-06	0.285387	HP:0011729	1063	55	EFNB1|AIMP2|SLC1A4|PI4KA|RRAS2|NOTCH2|MPP5|PDGFRB|SLC12A2|CBL|TNPO3|PIK3C2A|NONO|INPPL1|MAP2K1|SEC23A|VPS37A|TUBB3|PPP2R1A|BGN|EXOC7|PSMD12|ANKLE2|MYPN|LONP1|KIF14|MAP3K7|NRAS|GNAI3|NSDHL|DPM1|STXBP1|FGD1|IL6ST|DNM2|GARS1|WASF1|FAT4|PPP1R12A|RAB3GAP1|RPL10|EIF2B1|GPHN|PPP2R5D|FLNB|SERPINH1|DAG1|ITGA7|ACTG1|COASY|PIP5K1C|PHGDH|CTNNB1|TPM2|CDC42
Monarch Phenotype	Abnormality of limb bone morphology	0.00065	3031	3.3e-06	0.318709	HP:0002813	1459	71	EFNB1|ACTA2|PI4KA|RRAS2|NOTCH2|MPP5|AARS1|PDGFRB|SLC12A2|MAP2K2|ARCN1|CBL|RAB7A|PIK3C2A|CDH11|RASA1|NONO|VPS51|DNAAF5|INPPL1|MAP2K1|MMP14|MET|RPS15A|TUBB3|PPP2R1A|FTSJ1|BGN|RAB11B|EXOC7|ARHGEF1|ACSL4|PSMD12|ANKLE2|MYLK|LONP1|KIF14|MAP3K7|NRAS|NSDHL|CHUK|DPM1|STXBP1|FGD1|NHS|SBF1|IL6ST|GARS1|WASF1|FAT4|CTNND1|PPP1R12A|GDI1|RHOA|RAB3GAP1|RPL10|SLC2A1|PPP2R5D|FLNB|SERPINH1|DAG1|PLCB3|ACTG1|PHGDH|MTA…
Monarch Phenotype	Abnormality of limbs	2.29e-05	3031	3.39e-08	0.464016	HP:0040064	2018	98	EFNB1|SNAP29|AHCY|ACTA2|PI4KA|RRAS2|NOTCH2|MPP5|AARS1|PDGFRB|SLC12A2|MAP2K2|ARCN1|CBL|RAB7A|TNPO3|PIK3C2A|CDH11|SCYL1|RASA1|NONO|VPS51|CCT5|GNAQ|DNAAF5|INPPL1|HPRT1|MAP2K1|YWHAG|SEC23A|MMP14|MET|VPS37A|RPS15A|TUBB3|PPP2R1A|FTSJ1|BGN|RAB11B|NEXN|EXOC7|ARHGEF1|ACSL4|CTSB|PSMD12|ANKLE2|EPHB4|GMPPA|TPM1|CASP8|MYPN|MYLK|LONP1|KIF14|MAP3K7|NRAS|NSDHL|CHUK|DPM1|STXBP1|YARS1|FGD1|NHS|SBF1|IL6ST|DNM2|GARS…
Monarch Phenotype	Abnormality of lower limb joint	0.0295	3031	0.00058	0.153018	HP:0100491	558	30	NOTCH2|AARS1|SLC12A2|MAP2K2|NONO|INPPL1|MAP2K1|TUBB3|BGN|ANKLE2|LONP1|MAP3K7|NRAS|NSDHL|DPM1|STXBP1|FGD1|IL6ST|WASF1|RAB3GAP1|RPL10|GPHN|PPP2R5D|FLNB|SERPINH1|DAG1|ITGA7|UBAP1|TPM2|EIF4A3
Monarch Phenotype	Abnormality of metabolism/homeostasis	0.0221	3031	0.0004	0.165561	HP:0001939	2168	86	SNAP29|AHCY|RP2|SERPINE1|GALK1|SLC25A11|SNX17|PMPCB|RRAS2|NOTCH2|PDGFRB|SLC12A2|MAP2K2|CBL|CUL3|TNPO3|ACAT1|PIK3C2A|CDH11|SCYL1|RASA1|VPS51|CCT5|QDPR|RPIA|GNAQ|MYO1E|INPPL1|HPRT1|MAP2K1|BCR|MMP14|ACAD9|GNAI2|ITGA3|MET|RPS15A|TUFM|ENO3|NEXN|AP1B1|EPHB4|TPM1|CASP8|MYPN|KIRREL1|MSN|MYLK|LONP1|COMT|PTPN14|NRAS|RARS2|NSDHL|CHUK|DPM1|APRT|IL6ST|DNM2|GIPC1|FAT4|BLVRA|ARPC1B|TKT|DDOST|EIF2B1|SLC2A1|GPHN|…
Monarch Phenotype	Abnormality of movement	0.0019	3031	1.46e-05	0.272125	HP:0100022	1758	79	SNAP29|RP2|AIMP2|SLC25A11|SLC1A4|PMPCB|PI4KA|MPP5|TAOK1|AARS1|SLC12A2|SLC9A1|ARCN1|TUBB4A|RAB7A|ACAT1|CDH2|SCYL1|NONO|VPS51|CCT5|QDPR|GNAQ|CSTB|HPRT1|YWHAG|VPS37A|FMN2|UGDH|TUBB3|PPP2R1A|FTSJ1|RAB11B|EPB41L1|PLCB1|EZR|ACSL4|PARK7|PSMD12|ANKLE2|GMPPA|MYPN|LONP1|CYB5R3|KIF14|NHLRC2|NRAS|RARS2|DPM1|ADPRHL2|STXBP1|OPTN|ITPA|SBF1|DNM2|GARS1|WASF1|GIPC1|ASNS|TKT|GDI1|DDOST|RAB3GAP1|RPL10|EIF2B1|SLC2A1|…
Monarch Phenotype	Abnormality of neuronal migration	0.0057	3031	7.08e-05	0.224413	HP:0002269	466	29	SNAP29|PI4KA|TAOK1|PDGFRB|SLC12A2|CDH2|FMN2|MPDZ|TUBB3|TUFM|EXOC7|EPB41L1|EZR|ANKLE2|LONP1|KIF14|NRAS|NSDHL|STXBP1|ASNS|FAT4|PPP1R12A|RAB3GAP1|EIF2B1|GPHN|DAG1|ACTG1|PHGDH|CASK
Monarch Phenotype	Abnormality of refraction	0.0198	3031	0.00035	0.170333	HP:0000539	888	43	RP2|RRAS2|NOTCH2|MPP5|PDGFRB|SLC12A2|MAP2K2|ARCN1|CDH2|EGFR|NONO|ANK3|GNAQ|NRG1|MAP2K1|MPDZ|RAB11B|TUBB4B|PSMD12|AP1B1|EPHA2|KIRREL1|PTPRF|TSC22D2|UTRN|MAP3K7|NRAS|BICC1|PALM2AKAP2|PARD3|FGD1|OPTN|PPP1R12A|RHOA|RPL10|PPP2R5D|AMOTL2|TJP2|DAG1|PEAK1|BCAS3|CASK|CTNNB1
Monarch Phenotype	Abnormality of skin adnexa morphology	0.0075	3031	9.92e-05	0.212494	HP:0011138	1165	55	EFNB1|AHCY|AIMP2|SLC1A4|RRAS2|NOTCH2|MPP5|PDGFRB|SLC12A2|MAP2K2|CBL|RAB7A|PIK3C2A|CDH11|CDH2|EGFR|VPS51|FLCN|CSTB|INPPL1|MAP2K1|SEC23A|MMP14|ITGA3|VPS37A|RPS15A|UGDH|PPP2R1A|PSMD12|AP1B1|CYB5R3|MAP3K7|NRAS|NSDHL|CHUK|DPM1|STXBP1|FGD1|FAT4|CTNND1|RHOA|RAB3GAP1|RPL10|SLC2A1|PPP2R5D|FLNB|ACTG1|PHGDH|MTAP|CASK|RPS7|CTNNB1|RPL11|CDC42|TTC37
Monarch Phenotype	Abnormality of skin morphology	0.0101	3031	0.00015	0.199568	HP:0011121	1648	71	EFNB1|SNAP29|RP2|SERPINE1|ACTA2|GALK1|SLC25A11|RRAS2|NOTCH2|MPP5|PDGFRB|SLC12A2|MAP2K2|CBL|TNPO3|ACAT1|CDH11|RASA1|EGFR|NONO|VPS51|CCT5|FLCN|GNAQ|CSTB|DIP2B|MAP2K1|SEC23A|MMP14|ITGA3|MET|RPS15A|RAB11B|NEXN|PLCB1|CTSB|PSMD12|AP1B1|EPHB4|GMPPA|TPM1|CASP8|MYPN|MYLK|LONP1|CYB5R3|MAP3K7|NRAS|GNAI3|NSDHL|CHUK|DPM1|STXBP1|FGD1|WASF1|FAT4|CTNND1|DDOST|RHOA|RAB3GAP1|RPL10|SLC2A1|FLNB|PHGDH|MTAP|RPS7|CTNNB…
Monarch Phenotype	Abnormality of skull size	1.94e-07	3031	4.76e-11	0.67122	HP:0000240	1333	81	EFNB1|SNAP29|AHCY|AIMP2|GALK1|SLC1A4|PMPCB|PI4KA|NOTCH2|MPP5|TAOK1|AARS1|PDGFRB|SLC12A2|MAP2K2|ARCN1|TUBB4A|CDH11|CDH2|NONO|VPS51|ANK3|QDPR|GNAQ|INPPL1|MAP2K1|YWHAG|SEC23A|ITGA3|VPS37A|RPS15A|FMN2|UGDH|MPDZ|TUBB3|TUFM|PPP2R1A|FTSJ1|BGN|RAB11B|EXOC7|EPB41L1|EZR|ACSL4|PSMD12|ANKLE2|GMPPA|LONP1|CYB5R3|KIF14|NRAS|RARS2|GNAI3|NSDHL|CHUK|DPM1|STXBP1|ITPA|SBF1|DNM2|ASNS|FAT4|PPP1R12A|GDI1|RAB3GAP1|RPL10…
Monarch Phenotype	Abnormality of the abdominal wall	0.0198	3031	0.00035	0.170333	HP:0004298	415	25	EFNB1|ACTA2|RRAS2|NOTCH2|CBL|CDH11|MMP14|PPP2R1A|MYLK|LONP1|NRAS|NSDHL|CHUK|STXBP1|FGD1|PPP1R12A|RPL10|GPHN|FLNB|SERPINH1|PHGDH|CASK|CTNNB1|CDC42|TTC37
Monarch Phenotype	Abnormality of the cardiovascular system	0.0048	3031	5.72e-05	0.231876	HP:0001626	2438	99	SNAP29|AHCY|RP2|SERPINE1|ACTA2|GALK1|SLC25A11|RRAS2|NOTCH2|MPP5|PDGFRB|SLC12A2|MAP2K2|ARCN1|CBL|CUL3|NRP1|ACAT1|PIK3C2A|CDH2|SCYL1|RASA1|EGFR|NONO|ANK3|GNAQ|NRG1|MYO1E|DNAAF5|INPPL1|MAP2K1|BCR|SEC23A|MMP14|ACAD9|GNAI2|ITGA3|MET|RPS15A|FMN2|PPP2R1A|EIF4A2|BGN|NEXN|CTSB|SRGAP1|PSMD12|AP1B1|EPHB4|GMPPA|TPM1|CASP8|MYPN|MYLK|LONP1|PTPN14|VTA1|NHLRC2|MAP3K7|NRAS|GNAI3|NSDHL|CHUK|DPM1|STK4|STXBP1|FGD1|A…
Monarch Phenotype	Abnormality of the curvature of the vertebral column	0.00066	3031	3.56e-06	0.318046	HP:0010674	975	53	EFNB1|AIMP2|ACTA2|RRAS2|NOTCH2|MPP5|TAOK1|PDGFRB|SLC12A2|MAP2K2|CBL|TUBB4A|PIK3C2A|CDH11|NONO|GNAQ|INPPL1|MAP2K1|YWHAG|SEC23A|VPS37A|TUBB3|PPP2R1A|BGN|EPB41L1|PSMD12|MYPN|MYLK|LONP1|MAP3K7|NRAS|NSDHL|STXBP1|FGD1|SBF1|IL6ST|DNM2|GARS1|FAT4|PPP1R12A|RAB3GAP1|RPL10|PPP2R5D|FLNB|SERPINH1|DAG1|ITGA7|ACTG1|PHGDH|CASK|RPL11|TPM2|CDC42
Monarch Phenotype	Abnormality of the dentition	0.0264	3031	0.0005	0.15784	HP:0000164	821	40	EFNB1|SNAP29|AHCY|AIMP2|NOTCH2|MPP5|AARS1|PDGFRB|SLC12A2|PIK3C2A|CDH11|NONO|VPS51|CSTB|YWHAG|SEC23A|FTSJ1|ACSL4|PSMD12|LONP1|MAP3K7|NRAS|GNAI3|NSDHL|STXBP1|FGD1|NHS|IL6ST|FAT4|CTNND1|GDI1|RHOA|RAB3GAP1|RPL10|FLNB|SERPINH1|ITGA7|TPM2|EIF4A3|CDC42
Monarch Phenotype	Abnormality of the digestive system	9.37e-06	3031	9.22e-09	0.502826	HP:0025031	2389	113	EFNB1|AHCY|AIMP2|SERPINE1|ACTA2|GALK1|SLC25A11|SLC1A4|PMPCB|PI4KA|RRAS2|NOTCH2|MPP5|TAOK1|AARS1|PDGFRB|SLC12A2|MAP2K2|ARCN1|CBL|TUBB4A|ACAT1|PIK3C2A|CDH11|SCYL1|EGFR|NONO|VPS51|QDPR|FLCN|GNAQ|BAX|DNAAF5|INPPL1|HPRT1|MAP2K1|BCR|YWHAG|SEC23A|MMP14|ACAD9|MET|RPS15A|FMN2|UGDH|TUBB3|TUFM|PPP2R1A|FTSJ1|RAB11B|EPB41L1|EZR|ACSL4|PARK7|PSMD12|AP1B1|EPHB4|GMPPA|CASP8|MYPN|MYLK|LONP1|NHLRC2|MAP3K7|NRAS|RARS…
Monarch Phenotype	Abnormality of the ear	0.00066	3031	3.58e-06	0.318046	HP:0000598	1919	87	EFNB1|SNAP29|RP2|GALK1|SLC25A11|SLC1A4|PMPCB|PI4KA|RRAS2|NOTCH2|MPP5|AARS1|PDGFRB|SLC12A2|MAP2K2|CBL|TUBB4A|PIK3C2A|CDH11|CDH2|EGFR|VPS51|GNAQ|DNAAF5|MAP2K1|ITGA3|VPS37A|RPS15A|UGDH|MPDZ|TUBB3|FTSJ1|RAB11B|NEXN|EXOC7|PLS1|ACSL4|PSMD12|AP1B1|GMPPA|TPM1|MYPN|LONP1|KIF14|MAP3K7|NRAS|GNAI3|NSDHL|CHUK|ADPRHL2|FGD1|PIP4K2A|NHS|IL6ST|GIPC1|ASNS|FAT4|CTNND1|MAGI1|TPRN|PPP1R12A|TKT|GDI1|RAB3GAP1|RPL10|SLC…
Monarch Phenotype	Abnormality of the eye	1.75e-05	3031	2.44e-08	0.475696	HP:0000478	2876	128	EFNB1|SNAP29|AHCY|RP2|ACTA2|GALK1|SLC25A11|SLC1A4|PMPCB|PI4KA|RRAS2|NOTCH2|MPP5|TAOK1|AARS1|PDGFRB|SLC12A2|MAP2K2|SLC9A1|ARCN1|CBL|TUBB4A|PIK3C2A|CDH11|CDH2|SCYL1|EGFR|NONO|VPS51|ANK3|RPIA|FLCN|GNAQ|NRG1|DNAAF5|INPPL1|MAP2K1|CTNNA1|YWHAG|SEC23A|MMP14|ITGA3|DNMBP|RPS15A|FMN2|UGDH|MPDZ|TUBB3|TUFM|PPP2R1A|BGN|RAB11B|EPB41L1|EZR|PARK7|TUBB4B|PSMD12|AP1B1|ANKLE2|GMPPA|EPHA2|MYPN|KIRREL1|PTPRF|MYLK|LON…
Monarch Phenotype	Abnormality of the face	7.82e-05	3031	2.69e-07	0.410679	HP:0000271	2641	116	EFNB1|SNAP29|AHCY|RP2|AIMP2|SERPINE1|ACTA2|SLC25A11|SLC1A4|PI4KA|RRAS2|NOTCH2|MPP5|TAOK1|AARS1|PDGFRB|SLC12A2|MAP2K2|ARCN1|CBL|TUBB4A|PIK3C2A|CDH11|CDH2|RASA1|EGFR|NONO|VPS51|ANK3|QDPR|GNAQ|NRG1|CSTB|DNAAF5|INPPL1|MAP2K1|YWHAG|SEC23A|MMP14|ITGA3|RPS15A|FMN2|UGDH|MPDZ|TUBB3|PPP2R1A|FTSJ1|BGN|RAB11B|EXOC7|EPB41L1|EZR|ACSL4|PARK7|DLG1|FILIP1L|PSMD12|AP1B1|ANKLE2|EPHB4|MYPN|MYLK|LONP1|CYB5R3|PTPN14|K…
Monarch Phenotype	Abnormality of the forehead	0.00069	3031	3.88e-06	0.316115	HP:0000290	926	51	EFNB1|RRAS2|NOTCH2|MPP5|AARS1|PDGFRB|SLC12A2|MAP2K2|CBL|PIK3C2A|CDH11|CDH2|NONO|INPPL1|MAP2K1|YWHAG|SEC23A|ITGA3|RPS15A|MPDZ|PPP2R1A|BGN|PSMD12|AP1B1|ANKLE2|LONP1|KIF14|MAP3K7|NRAS|RARS2|STXBP1|FGD1|ASNS|FAT4|CTNND1|RAB3GAP1|RPL10|SLC2A1|PPP2R5D|FLNB|SERPINH1|ACTG1|COASY|ADSL|PHGDH|CASK|RPS7|RPL11|CDC42|TTC37|AMPD2
Monarch Phenotype	Abnormality of the gastrointestinal tract	0.0019	3031	1.41e-05	0.272125	HP:0011024	1384	66	AHCY|SERPINE1|ACTA2|SLC1A4|PI4KA|RRAS2|NOTCH2|TAOK1|AARS1|PDGFRB|SLC12A2|MAP2K2|CBL|TUBB4A|PIK3C2A|CDH11|EGFR|NONO|VPS51|QDPR|FLCN|GNAQ|BAX|DNAAF5|HPRT1|MAP2K1|YWHAG|SEC23A|MET|RPS15A|FTSJ1|EPB41L1|ACSL4|AP1B1|GMPPA|CASP8|MYPN|MYLK|LONP1|MAP3K7|NRAS|STXBP1|OPTN|DNM2|GIPC1|FAT4|CTNND1|PPP1R12A|ARPC1B|GDI1|DDOST|RPL10|EIF2B1|GPHN|PPP2R5D|FLNB|SERPINH1|TJP2|ITGA7|PHGDH|RPS7|CTNNB1|RPL11|TPM2|TTC37|J…
Monarch Phenotype	Abnormality of the genitourinary system	0.028	3031	0.00054	0.155284	HP:0000119	2189	86	EFNB1|SNAP29|RP2|SERPINE1|ACTA2|GALK1|SLC25A11|SNX17|SLC1A4|RRAS2|NOTCH2|MPP5|PDGFRB|SLC12A2|MAP2K2|ARCN1|CBL|ACAT1|PIK3C2A|CDH11|CDH2|RASA1|NONO|RPIA|FLCN|MYO1E|BAX|DNAAF5|INPPL1|HPRT1|MAP2K1|SEC23A|MMP14|ACAD9|ITGA3|MET|RPS15A|PPP2R1A|FTSJ1|ACSL4|PARK7|PSMD12|ANKLE2|EPHB4|KIRREL1|MSN|MYLK|LONP1|KIF14|MAP3K7|NRAS|NSDHL|CHUK|STXBP1|FGD1|APRT|SBF1|DNM2|WASF1|FAT4|BLVRA|PPP1R12A|TKT|GDI1|DDOST|RAB3…
Monarch Phenotype	Abnormality of the hairline	0.0077	3031	0.0001	0.211351	HP:0009553	205	17	EFNB1|RRAS2|NOTCH2|MAP2K2|CBL|PIK3C2A|CDH2|VPS51|MAP2K1|RPS15A|MAP3K7|NRAS|FGD1|RAB3GAP1|ACTG1|RPS7|RPL11
Monarch Phenotype	Abnormality of the hand	0.0127	3031	0.00019	0.18962	HP:0001155	1312	59	EFNB1|SNAP29|ACTA2|PI4KA|RRAS2|NOTCH2|MPP5|PDGFRB|SLC12A2|MAP2K2|CBL|PIK3C2A|NONO|VPS51|CCT5|INPPL1|MAP2K1|MMP14|RPS15A|TUBB3|PPP2R1A|FTSJ1|BGN|RAB11B|NEXN|ACSL4|CTSB|PSMD12|ANKLE2|GMPPA|TPM1|MYPN|MYLK|LONP1|MAP3K7|NRAS|NSDHL|DPM1|STXBP1|FGD1|NHS|IL6ST|GARS1|WASF1|ASNS|FAT4|GDI1|RAB3GAP1|RPL10|FLNB|ITGA7|ACTG1|PHGDH|CASK|RPS7|RPL11|TPM2|EIF4A3|CDC42
Monarch Phenotype	Abnormality of the head	6.52e-05	3031	1.97e-07	0.418575	HP:0000234	2865	124	EFNB1|SNAP29|AHCY|RP2|AIMP2|SERPINE1|ACTA2|GALK1|SLC25A11|SLC1A4|PMPCB|PI4KA|RRAS2|NOTCH2|MPP5|TAOK1|AARS1|PDGFRB|SLC12A2|MAP2K2|ARCN1|CBL|TUBB4A|PIK3C2A|CDH11|CDH2|RASA1|EGFR|NONO|VPS51|ANK3|QDPR|GNAQ|NRG1|CSTB|DNAAF5|INPPL1|MAP2K1|YWHAG|SEC23A|MMP14|ITGA3|VPS37A|RPS15A|FMN2|UGDH|MPDZ|TUBB3|TUFM|PPP2R1A|FTSJ1|BGN|RAB11B|EXOC7|EPB41L1|EZR|ACSL4|PARK7|DLG1|FILIP1L|PSMD12|AP1B1|ANKLE2|EPHB4|GMPPA|M…
Monarch Phenotype	Abnormality of the immune system	0.0231	3031	0.00042	0.163639	HP:0002715	1682	70	SNAP29|GALK1|SLC1A4|RRAS2|NOTCH2|PDGFRB|MAP2K2|CBL|RAB7A|ACAT1|PIK3C2A|IQGAP1|SCYL1|RASA1|EGFR|VPS51|CCT5|GNAQ|BAX|DNAAF5|INPPL1|STAT6|BCR|ITGA3|MET|RPS15A|NEXN|CTSB|AP1B1|EPHB4|TPM1|CASP8|MYPN|KIRREL1|MSN|MYLK|LONP1|NHLRC2|MAP3K7|NRAS|DPM1|STK4|NEK6|APRT|IL6ST|WASF1|GIPC1|PICALM|FAT4|ARPC1B|TKT|DDOST|PHLDB2|RAB3GAP1|RPL10|EIF2B1|SLC2A1|PTPRK|ITGA7|FARP1|MTAP|RPS7|CTNNB1|RPL11|TPM2|CDC42|TTC37|CA…
Monarch Phenotype	Abnormality of the integument	0.0029	3031	2.59e-05	0.25376	HP:0001574	2266	95	EFNB1|SNAP29|AHCY|RP2|AIMP2|SERPINE1|ACTA2|GALK1|SLC25A11|SLC1A4|RRAS2|NOTCH2|MPP5|PDGFRB|SLC12A2|MAP2K2|CBL|RAB7A|TNPO3|ACAT1|PIK3C2A|IQGAP1|CDH11|CDH2|RASA1|EGFR|NONO|VPS51|CCT5|FLCN|GNAQ|CSTB|INPPL1|STAT6|DIP2B|MAP2K1|SEC23A|MMP14|ITGA3|MET|VPS37A|RPS15A|UGDH|PPP2R1A|RAB11B|NEXN|PLCB1|CTSB|PSMD12|AP1B1|EPHB4|GMPPA|TPM1|CASP8|MYPN|MSN|MYLK|LONP1|CYB5R3|MAP3K7|NRAS|GNAI3|NSDHL|CHUK|DPM1|STK4|STX…
Monarch Phenotype	Abnormality of the lower limb	9.37e-06	3031	1.07e-08	0.502826	HP:0002814	1506	81	EFNB1|SNAP29|AHCY|ACTA2|PI4KA|NOTCH2|MPP5|AARS1|PDGFRB|SLC12A2|MAP2K2|ARCN1|RAB7A|PIK3C2A|CDH11|SCYL1|RASA1|NONO|CCT5|GNAQ|INPPL1|HPRT1|MAP2K1|SEC23A|MMP14|MET|TUBB3|PPP2R1A|FTSJ1|BGN|RAB11B|NEXN|EXOC7|ARHGEF1|ACSL4|CTSB|PSMD12|ANKLE2|GMPPA|TPM1|CASP8|MYPN|MYLK|LONP1|KIF14|MAP3K7|NRAS|NSDHL|CHUK|DPM1|STXBP1|YARS1|FGD1|SBF1|IL6ST|DNM2|GARS1|WASF1|GIPC1|ASNS|FAT4|GDI1|RHOA|RAB3GAP1|RPL10|GPHN|PPP2R…
Monarch Phenotype	Abnormality of the mouth	3.22e-05	3031	6.85e-08	0.449214	HP:0000153	1992	96	EFNB1|SNAP29|AHCY|AIMP2|SERPINE1|ACTA2|PI4KA|RRAS2|NOTCH2|MPP5|AARS1|PDGFRB|SLC12A2|MAP2K2|ARCN1|CBL|TUBB4A|PIK3C2A|CDH11|CDH2|EGFR|NONO|VPS51|ANK3|QDPR|GNAQ|NRG1|CSTB|INPPL1|MAP2K1|YWHAG|SEC23A|ITGA3|RPS15A|UGDH|TUBB3|PPP2R1A|FTSJ1|BGN|RAB11B|EXOC7|ACSL4|DLG1|FILIP1L|PSMD12|ANKLE2|MYPN|MYLK|LONP1|CYB5R3|PTPN14|KIF14|MAP3K7|NRAS|RARS2|GNAI3|NSDHL|CHUK|DPM1|ADPRHL2|STXBP1|FGD1|OPTN|NHS|IL6ST|GIPC1…
Monarch Phenotype	Abnormality of the musculature	4.11e-06	3031	2.22e-09	0.538616	HP:0003011	2384	115	EFNB1|SNAP29|AHCY|AIMP2|SERPINE1|SLC1A4|PMPCB|PI4KA|RRAS2|MPP5|TAOK1|AARS1|PDGFRB|SLC12A2|MAP2K2|CBL|TUBB4A|RAB7A|TNPO3|ACAT1|PIK3C2A|CDH2|SCYL1|RASA1|NONO|VPS51|CCT5|ANK3|QDPR|RPIA|INPPL1|HPRT1|MAP2K1|YWHAG|ACAD9|ITGA3|VPS37A|RPS15A|FMN2|UGDH|TUBB3|TUFM|ENO3|PPP2R1A|FTSJ1|BGN|RAB11B|NEXN|EXOC7|EPB41L1|PLCB1|EZR|ACSL4|PARK7|PSMD12|AP1B1|ANKLE2|EPHB4|GMPPA|TPM1|MYPN|LONP1|CYB5R3|KIF14|NHLRC2|MAP3K…
Monarch Phenotype	Abnormality of the musculature of the limbs	0.0162	3031	0.00027	0.179048	HP:0009127	481	28	PI4KA|AARS1|RAB7A|TNPO3|SCYL1|RASA1|YWHAG|VPS37A|RPS15A|EPHB4|GMPPA|MYPN|MAP3K7|STXBP1|YARS1|SBF1|DNM2|GARS1|GIPC1|FLNB|DAG1|ATP1A1|ITGA7|UBAP1|MTAP|RPS7|RPL11|TPM2
Monarch Phenotype	Abnormality of the musculoskeletal system	7.73e-06	3031	6.97e-09	0.511182	HP:0033127	3173	140	EFNB1|SNAP29|AHCY|RP2|AIMP2|SERPINE1|ACTA2|GALK1|SLC1A4|PMPCB|PI4KA|RRAS2|NOTCH2|MPP5|TAOK1|AARS1|PDGFRB|SLC12A2|MAP2K2|ARCN1|CBL|TUBB4A|RAB7A|TNPO3|ACAT1|PIK3C2A|CDH11|CDH2|SCYL1|RASA1|NONO|VPS51|CCT5|ANK3|QDPR|RPIA|FLCN|GNAQ|DNAAF5|INPPL1|HPRT1|MAP2K1|YWHAG|SEC23A|MMP14|ACAD9|ITGA3|MET|VPS37A|RPS15A|FMN2|UGDH|MPDZ|TUBB3|TUFM|ENO3|PPP2R1A|FTSJ1|BGN|RAB11B|NEXN|EXOC7|EPB41L1|ARHGEF1|PLCB1|EZR|ACS…
Monarch Phenotype	Abnormality of the neck	0.0179	3031	0.0003	0.174715	HP:0000464	510	29	EFNB1|RRAS2|NOTCH2|MAP2K2|CBL|TUBB4A|PIK3C2A|CDH11|CDH2|VPS51|INPPL1|MAP2K1|RPS15A|TUBB3|MAP3K7|NRAS|STXBP1|FGD1|RAB3GAP1|RPL10|SLC2A1|PPP2R5D|FLNB|ACTG1|PHGDH|RPS7|RPL11|TPM2|CDC42
Monarch Phenotype	Abnormality of the nervous system	9.37e-06	3031	1.1e-08	0.502826	HP:0000707	3471	149	EFNB1|SNAP29|AHCY|RP2|AIMP2|SERPINE1|ACTA2|GALK1|SLC25A11|SLC1A4|PMPCB|NECTIN2|PI4KA|RRAS2|NOTCH2|ITGAV|MPP5|TAOK1|AARS1|PDGFRB|SLC12A2|MAP2K2|SLC9A1|ARCN1|CBL|TUBB4A|RAB7A|TNPO3|ACAT1|PIK3C2A|CDH11|CDH2|SCYL1|RASA1|NONO|VPS51|CCT5|ANK3|QDPR|RPIA|GNAQ|NRG1|MYO1E|CSTB|DNAAF5|HPRT1|DIP2B|MAP2K1|YWHAG|SEC23A|MMP14|ACAD9|ITGA3|MET|VPS37A|RPS15A|FMN2|UGDH|MPDZ|TUBB3|TUFM|PPP2R1A|EIF4A2|FTSJ1|BGN|RAB11…
Monarch Phenotype	Abnormality of the nose	0.0152	3031	0.00024	0.181816	HP:0000366	1470	64	EFNB1|SNAP29|RP2|AIMP2|SERPINE1|SLC1A4|PI4KA|NOTCH2|MPP5|PDGFRB|SLC12A2|MAP2K2|CBL|PIK3C2A|CDH11|CDH2|RASA1|NONO|VPS51|DNAAF5|INPPL1|MAP2K1|SEC23A|ITGA3|RPS15A|MPDZ|PPP2R1A|FTSJ1|ACSL4|PARK7|PSMD12|EPHB4|LONP1|PTPN14|KIF14|MAP3K7|NRAS|RARS2|NSDHL|DPM1|STXBP1|FGD1|NHS|FAT4|PPP1R12A|GDI1|RHOA|RAB3GAP1|RPL10|SLC2A1|PPP2R5D|FLNB|PLCB3|ACTG1|ADSL|PHGDH|CASK|RPS7|CTNNB1|RPL11|TPM2|EIF4A3|CDC42|TTC37
Monarch Phenotype	Abnormality of the ocular adnexa	0.0006	3031	3.01e-06	0.322185	HP:0032039	1235	63	EFNB1|SNAP29|SLC1A4|RRAS2|NOTCH2|MPP5|AARS1|PDGFRB|SLC12A2|MAP2K2|CBL|TUBB4A|PIK3C2A|CDH11|CDH2|EGFR|NONO|VPS51|GNAQ|MAP2K1|YWHAG|ITGA3|RPS15A|UGDH|MPDZ|TUBB3|PPP2R1A|FTSJ1|BGN|RAB11B|ACSL4|PARK7|PSMD12|AP1B1|ANKLE2|LONP1|KIF14|MAP3K7|NRAS|NSDHL|DPM1|STXBP1|FGD1|WASF1|FAT4|CTNND1|PPP1R12A|TKT|GDI1|RHOA|RAB3GAP1|RPL10|PPP2R5D|FLNB|TENM3|ACTG1|PHGDH|CASK|RPS7|RPL11|CDC42|TTC37|AMPD2
Monarch Phenotype	Abnormality of the orbital region	0.00035	3031	1.62e-06	0.345593	HP:0000315	1319	67	EFNB1|SNAP29|SLC25A11|SLC1A4|RRAS2|NOTCH2|MPP5|AARS1|PDGFRB|SLC12A2|MAP2K2|CBL|TUBB4A|PIK3C2A|CDH11|CDH2|EGFR|NONO|VPS51|GNAQ|MAP2K1|YWHAG|MMP14|ITGA3|RPS15A|UGDH|MPDZ|TUBB3|PPP2R1A|FTSJ1|BGN|RAB11B|ACSL4|PARK7|PSMD12|AP1B1|ANKLE2|LONP1|KIF14|MAP3K7|NRAS|NSDHL|DPM1|STXBP1|FGD1|WASF1|FAT4|CTNND1|PPP1R12A|TKT|GDI1|RHOA|RAB3GAP1|RPL10|PPP2R5D|FLNB|TENM3|SERPINH1|ACTG1|PHGDH|CASK|RPS7|CTNNB1|RPL11|CD…
Monarch Phenotype	Abnormality of the outer ear	0.002	3031	1.67e-05	0.269897	HP:0000356	1033	53	SNAP29|SLC1A4|RRAS2|NOTCH2|MPP5|SLC12A2|MAP2K2|CBL|CDH11|CDH2|EGFR|VPS51|MAP2K1|ITGA3|VPS37A|RPS15A|UGDH|MPDZ|TUBB3|FTSJ1|RAB11B|EXOC7|PSMD12|LONP1|KIF14|MAP3K7|NRAS|GNAI3|NSDHL|CHUK|FGD1|NHS|ASNS|FAT4|PPP1R12A|RAB3GAP1|RPL10|SLC2A1|PPP2R5D|FLNB|TENM3|DAG1|ACTG1|ADSL|PHGDH|CASK|RPS7|RPL11|TPM2|EIF4A3|CDC42|TTC37|AMPD2
Monarch Phenotype	Abnormality of the palpebral fissures	2.81e-05	3031	5.75e-08	0.455129	HP:0008050	680	46	EFNB1|SNAP29|RRAS2|NOTCH2|MPP5|AARS1|PDGFRB|SLC12A2|MAP2K2|CBL|CDH11|CDH2|NONO|MAP2K1|YWHAG|UGDH|MPDZ|TUBB3|PPP2R1A|FTSJ1|BGN|RAB11B|ACSL4|PSMD12|AP1B1|ANKLE2|KIF14|MAP3K7|NRAS|NSDHL|DPM1|STXBP1|FGD1|WASF1|FAT4|PPP1R12A|GDI1|RHOA|RAB3GAP1|RPL10|PPP2R5D|TENM3|ACTG1|CDC42|TTC37|AMPD2
Monarch Phenotype	Abnormality of the philtrum	0.00017	3031	7.28e-07	0.376955	HP:0000288	535	37	NOTCH2|MPP5|SLC12A2|MAP2K2|CBL|CDH11|CDH2|NONO|VPS51|INPPL1|MAP2K1|SEC23A|UGDH|FTSJ1|EXOC7|ACSL4|PSMD12|LONP1|MAP3K7|NRAS|DPM1|FGD1|FAT4|PPP1R12A|GDI1|RAB3GAP1|RPL10|SLC2A1|PPP2R5D|TENM3|ACTG1|ADSL|PHGDH|CASK|CTNNB1|CDC42|TTC37
Monarch Phenotype	Abnormality of the posterior hairline	0.0039	3031	4.12e-05	0.240894	HP:0030141	83	11	EFNB1|RRAS2|MAP2K2|CBL|PIK3C2A|CDH2|VPS51|MAP2K1|NRAS|RAB3GAP1|ACTG1
Monarch Phenotype	Abnormality of the respiratory system	0.0026	3031	2.3e-05	0.258503	HP:0002086	1636	74	SNAP29|AHCY|AIMP2|ACTA2|GALK1|SLC1A4|PI4KA|RRAS2|NOTCH2|MPP5|PDGFRB|SLC12A2|ARCN1|CBL|TUBB4A|TNPO3|ACAT1|RASA1|EGFR|NONO|VPS51|FLCN|GNAQ|DNAAF5|INPPL1|ITGA3|MET|TUFM|BGN|PSMD12|EPHB4|GMPPA|CASP8|MYPN|MSN|MYLK|LONP1|CYB5R3|NIBAN1|NHLRC2|MAP3K7|NRAS|RARS2|GNAI3|NSDHL|CHUK|DPM1|STXBP1|OPTN|IL6ST|DNM2|GARS1|GIPC1|ASNS|FAT4|AGFG1|ANXA11|RAB3GAP1|RPL10|SLC2A1|FLNB|SERPINH1|DAG1|PLCB3|ITGA7|PIP5K1C|PHGD…
Monarch Phenotype	Abnormality of the scalp hair	0.0237	3031	0.00044	0.162525	HP:0100037	302	20	EFNB1|RRAS2|NOTCH2|MAP2K2|CBL|PIK3C2A|CDH2|EGFR|VPS51|MAP2K1|ITGA3|RPS15A|MAP3K7|NRAS|FGD1|RHOA|RAB3GAP1|ACTG1|RPS7|RPL11
Monarch Phenotype	Abnormality of the skeletal system	4.13e-05	3031	9.82e-08	0.438405	HP:0000924	2708	120	EFNB1|SNAP29|AHCY|AIMP2|SERPINE1|ACTA2|GALK1|SLC1A4|PMPCB|PI4KA|RRAS2|NOTCH2|MPP5|TAOK1|AARS1|PDGFRB|SLC12A2|MAP2K2|ARCN1|CBL|TUBB4A|RAB7A|TNPO3|PIK3C2A|CDH11|CDH2|RASA1|NONO|VPS51|CCT5|ANK3|QDPR|GNAQ|DNAAF5|INPPL1|HPRT1|MAP2K1|YWHAG|SEC23A|MMP14|ITGA3|MET|VPS37A|RPS15A|FMN2|UGDH|MPDZ|TUBB3|TUFM|PPP2R1A|FTSJ1|BGN|RAB11B|EXOC7|EPB41L1|ARHGEF1|EZR|ACSL4|PSMD12|ANKLE2|GMPPA|CASP8|MYPN|MYLK|LONP1|CYB…
Monarch Phenotype	Abnormality of the skin	0.0033	3031	3.18e-05	0.248149	HP:0000951	1888	82	EFNB1|SNAP29|RP2|SERPINE1|ACTA2|GALK1|SLC25A11|RRAS2|NOTCH2|MPP5|PDGFRB|SLC12A2|MAP2K2|CBL|TNPO3|ACAT1|IQGAP1|CDH11|RASA1|EGFR|NONO|VPS51|CCT5|FLCN|GNAQ|CSTB|STAT6|DIP2B|MAP2K1|SEC23A|MMP14|ITGA3|MET|RPS15A|RAB11B|NEXN|PLCB1|CTSB|PSMD12|AP1B1|EPHB4|GMPPA|TPM1|CASP8|MYPN|MSN|MYLK|LONP1|CYB5R3|MAP3K7|NRAS|GNAI3|NSDHL|CHUK|DPM1|STK4|STXBP1|NEK6|FGD1|IL6ST|WASF1|FAT4|CTNND1|TKT|DDOST|RHOA|RAB3GAP1|RP…
Monarch Phenotype	Abnormality of the upper limb	0.0022	3031	1.9e-05	0.265758	HP:0002817	1426	67	EFNB1|SNAP29|ACTA2|PI4KA|RRAS2|NOTCH2|MPP5|PDGFRB|SLC12A2|MAP2K2|CBL|TNPO3|PIK3C2A|CDH11|RASA1|NONO|VPS51|CCT5|GNAQ|INPPL1|MAP2K1|MMP14|VPS37A|RPS15A|TUBB3|PPP2R1A|FTSJ1|BGN|RAB11B|NEXN|ACSL4|CTSB|PSMD12|ANKLE2|GMPPA|TPM1|MYPN|MYLK|LONP1|MAP3K7|NRAS|NSDHL|CHUK|DPM1|STXBP1|FGD1|NHS|IL6ST|DNM2|GARS1|WASF1|GIPC1|ASNS|FAT4|GDI1|RAB3GAP1|RPL10|FLNB|ITGA7|ACTG1|PHGDH|CASK|RPS7|RPL11|TPM2|EIF4A3|CDC42
Monarch Phenotype	Abnormality of the urinary system	0.0113	3031	0.00017	0.194692	HP:0000079	1657	71	EFNB1|SNAP29|GALK1|SLC25A11|SNX17|SLC1A4|NOTCH2|PDGFRB|MAP2K2|ARCN1|ACAT1|PIK3C2A|CDH11|RASA1|RPIA|FLCN|MYO1E|BAX|INPPL1|HPRT1|MAP2K1|ACAD9|ITGA3|MET|RPS15A|PPP2R1A|FTSJ1|ACSL4|PSMD12|ANKLE2|EPHB4|KIRREL1|MSN|MYLK|LONP1|KIF14|MAP3K7|NRAS|NSDHL|CHUK|STXBP1|APRT|SBF1|DNM2|WASF1|FAT4|BLVRA|PPP1R12A|TKT|GDI1|DDOST|RAB3GAP1|RPL10|EIF2B1|SLC2A1|GPHN|FLNB|ARL15|SERPINH1|ATP1A1|ACTG1|YAP1|UBAP1|PHGDH|CAS…
Monarch Phenotype	Abnormality of the vasculature	0.0029	3031	2.68e-05	0.25376	HP:0002597	1673	75	SNAP29|RP2|SERPINE1|ACTA2|GALK1|SLC25A11|RRAS2|NOTCH2|MPP5|PDGFRB|SLC12A2|MAP2K2|CBL|NRP1|PIK3C2A|CDH2|SCYL1|RASA1|EGFR|NONO|GNAQ|NRG1|DNAAF5|INPPL1|MAP2K1|BCR|SEC23A|MMP14|ACAD9|ITGA3|MET|RPS15A|PPP2R1A|EIF4A2|BGN|CTSB|SRGAP1|PSMD12|AP1B1|EPHB4|CASP8|MYPN|MYLK|LONP1|MAP3K7|NRAS|GNAI3|NSDHL|CHUK|DPM1|GDI2|DNM2|PICALM|FAT4|ABCC1|ARPC1B|TKT|RPL10|EIF2B1|SLC2A1|FLNB|SERPINH1|TJP2|PLCB3|ACTG1|PHGDH|M…
Monarch Phenotype	Abnormality of the vertebral column	0.002	3031	1.68e-05	0.269897	HP:0000925	1252	61	EFNB1|AIMP2|ACTA2|RRAS2|NOTCH2|MPP5|TAOK1|PDGFRB|SLC12A2|MAP2K2|CBL|TUBB4A|TNPO3|PIK3C2A|CDH11|RASA1|NONO|GNAQ|INPPL1|MAP2K1|YWHAG|SEC23A|MMP14|VPS37A|RPS15A|TUBB3|PPP2R1A|BGN|EPB41L1|PSMD12|MYPN|MYLK|LONP1|MAP3K7|NRAS|NSDHL|STXBP1|FGD1|SBF1|IL6ST|DNM2|GARS1|FAT4|PPP1R12A|RAB3GAP1|RPL10|SLC2A1|PPP2R5D|FLNB|SERPINH1|DAG1|PLCB3|ITGA7|ACTG1|PHGDH|CASK|RPS7|CTNNB1|RPL11|TPM2|CDC42
Monarch Phenotype	Abnormality of upper lip vermillion	0.0059	3031	7.44e-05	0.222915	HP:0011339	373	25	MPP5|PDGFRB|SLC12A2|CDH11|CDH2|NONO|VPS51|SEC23A|PPP2R1A|FTSJ1|RAB11B|ACSL4|PSMD12|ANKLE2|KIF14|FAT4|GDI1|RPL10|SLC2A1|PPP2R5D|ACTG1|ADSL|RPS7|CTNNB1|CDC42
UniProt Keywords	Acetylation	2.44e-59	3031	7.26e-62	5.86126	KW-0007	3362	263	RANBP9|MRI1|PSMC4|PYGB|TPD52L2|AHCY|CSK|EHD4|CDC37|NAMPT|PSMA2|SEC61B|AK1|ACTA2|SLC25A11|LRRC59|ARPC3|EXOC2|DOK1|SLC1A4|DDX39A|PLCG1|VASP|TRAP1|CANX|SNAP23|TSG101|HIP1R|EXOC4|WDR44|LGALS3|RRAS2|CCNB1|CCT7|BCAR3|PSMC1|IPO5|PSMD11|AARS1|HACD3|SNX1|COTL1|SLC12A2|RAB2A|MAP2K2|ACTR3|PACSIN2|NAPA|PPP1R12C|ARCN1|CUL3|RAB10|PDCD6|RAB7A|TNPO3|PRKAR2A|ACAT1|PIK3C2A|PXN|IQGAP1|PFKL|PGD|RASA1|CCT6A|NONO|VPS5…
Reactome Pathways	Acetylcholine regulates insulin secretion	0.0288	3031	0.0044	0.154061	HSA-399997	10	3	GNAQ|PLCB1|PLCB3
GO Molecular Function	Actin binding	1.35e-20	3031	4.39e-23	1.98697	GO:0003779	448	61	BAIAP2L1|ARPC3|VASP|CNN1|HIP1R|COTL1|AJUBA|ACTR3|IQGAP1|EGFR|MYO1E|INPPL1|CTNNA1|FMN2|CTNNAL1|LASP1|NEXN|FMNL3|PLS1|EPB41L1|EZR|MTSS2|PTK2|FERMT2|PDLIM7|PLS3|GMFB|TPM1|MYPN|MSN|MYLK|IQGAP3|CALD1|AFDN|UTRN|EPB41L2|CNN3|PDLIM1|PHACTR4|FSCN1|WASF1|TAGLN|GIPC1|ITGB1|ARPC1B|CORO1C|AFAP1|FLNB|MYO10|CFL1|DAG1|TLN2|CNN2|PPP1R9B|PPP1R18|CYFIP1|WASF2|COBLL1|EPS8|RDX|TPM2
COMPARTMENTS	Actin cytoskeleton	6.87e-20	3031	4.18e-22	1.9163	GOCC:0015629	363	54	ARPC3|VASP|ACTR3|EHBP1|PXN|IQGAP1|ANK3|MYO1E|AXL|LLGL1|LASP1|NEXN|PLS1|EZR|PTK2|DPYSL3|PDLIM7|PLS3|TPM1|MYLK|NCKAP1|CALD1|CDC42BPA|UTRN|EPB41L2|CNN3|PDLIM1|AMOT|CLIC4|AHNAK|FSCN1|WASF1|GIPC1|PPP1R12A|ARPC1B|CORO1C|RHOA|AFAP1|SEPTIN7|SLC2A1|FLNB|MYO10|CFL1|SIPA1L1|PEAK1|TLN2|CNN2|ACTG1|SEPTIN2|CDC42EP3|WASF2|CASK|RDX|TPM2
GO Cellular Component	Actin cytoskeleton	4.15e-21	3031	5.67e-23	2.0382	GO:0015629	482	63	ACTA2|ARPC3|VASP|COTL1|ACTR3|EHBP1|PXN|IQGAP1|MYO1E|CRK|AXL|CTNNA1|FMN2|LLGL1|LASP1|NEXN|PLS1|EZR|MTSS2|PTK2|FERMT2|DPYSL3|FYN|PDLIM7|PLS3|TPM1|MYLK|NCKAP1|CALD1|CDC42BPA|UTRN|EPB41L2|CNN3|PDLIM1|AMOT|CLIC4|AHNAK|FSCN1|SNX9|WASF1|PPP1R12A|ARPC1B|CORO1C|AFAP1|SEPTIN7|SLC2A1|FLNB|MYO10|CFL1|SIPA1L1|PEAK1|TLN2|CNN2|ACTG1|YES1|PPP1R9B|SEPTIN2|CDC42EP3|WASF2|CASK|RDX|TPM2|ARHGAP35
GO Biological Process	Actin cytoskeleton organization	1.45e-24	3031	1.84e-28	2.38386	GO:0030036	547	75	RALA|BAIAP2L1|ARPC3|VASP|CNN1|HIP1R|PDGFRB|ACTR3|PACSIN2|EHD2|EHBP1|FARP2|CUL3|NRP1|MYO1E|ABI2|ITGB5|INPPL1|ARF6|CRK|BCR|CTNNA1|FMN2|LLGL1|FMNL3|PLS1|EPB41L1|EZR|RAP1GDS1|DPYSL3|FRMD6|DLG1|ARHGAP12|MINK1|PDLIM7|PLS3|TPM1|MYPN|NCKAP1|CALD1|CDC42BPA|UTRN|EPB41L2|RAB13|CNN3|PDLIM1|AMOT|PHACTR4|FGD1|ABI1|FSCN1|WASF1|ARAP1|ITGB1|AMOTL1|ARPC1B|CORO1C|RHOA|SHC1|CDK5|FLNB|AMOTL2|CFL1|RAN|SIPA1L1|CNN2|ACT…
GO Biological Process	Actin cytoskeleton reorganization	0.00044	3031	9.87e-06	0.335655	GO:0031532	70	11	RALA|FARP2|NRP1|EZR|MINK1|CDC42BPA|ARAP1|RHOA|SHC1|SIPA1L1|EPS8
COMPARTMENTS	Actin filament	5.13e-06	3031	1.36e-07	0.528988	GOCC:0005884	65	13	EHBP1|IQGAP1|EZR|DPYSL3|PDLIM7|PLS3|TPM1|NCKAP1|PDLIM1|AMOT|CFL1|ACTG1|TPM2
GO Cellular Component	Actin filament	1.78e-06	3031	6.93e-08	0.574958	GO:0005884	99	16	EHBP1|IQGAP1|FMN2|PLS1|EZR|DPYSL3|FYN|PDLIM7|PLS3|TPM1|NCKAP1|PDLIM1|AMOT|ACTG1|YES1|TPM2
GO Molecular Function	Actin filament binding	2.02e-09	3031	1.47e-11	0.869465	GO:0051015	213	29	HIP1R|COTL1|AJUBA|IQGAP1|EGFR|MYO1E|CTNNA1|CTNNAL1|LASP1|NEXN|FMNL3|PLS1|EZR|FERMT2|PLS3|TPM1|IQGAP3|AFDN|UTRN|FSCN1|TAGLN|CORO1C|FLNB|MYO10|CFL1|TLN2|PPP1R9B|CYFIP1|TPM2
COMPARTMENTS	Actin filament bundle	7.74e-05	3031	2.35e-06	0.411126	GOCC:0032432	47	10	PXN|PTK2|TPM1|MYLK|PDLIM1|AMOT|FSCN1|SEPTIN7|CFL1|CNN2
GO Cellular Component	Actin filament bundle	4.11e-07	3031	1.26e-08	0.638616	GO:0032432	74	15	ACTA2|PXN|PLS1|PTK2|FERMT2|PDLIM7|PLS3|TPM1|MYLK|PDLIM1|AMOT|FSCN1|SEPTIN7|FLNB|CNN2
GO Biological Process	Actin filament bundle assembly	3.76e-06	3031	5.06e-08	0.542481	GO:0051017	59	13	BAIAP2L1|CUL3|ITGB5|FMN2|PLS1|EZR|DPYSL3|PLS3|CALD1|PDLIM1|FSCN1|RHOA|EPS8
GO Biological Process	Actin filament organization	1.72e-09	3031	1.15e-11	0.876447	GO:0007015	274	33	BAIAP2L1|ARPC3|VASP|HIP1R|ACTR3|CUL3|MYO1E|ABI2|ITGB5|INPPL1|CTNNA1|FMN2|PLS1|EZR|DPYSL3|DLG1|ARHGAP12|PLS3|TPM1|CALD1|PDLIM1|ABI1|FSCN1|WASF1|ARAP1|ARPC1B|CORO1C|RHOA|CFL1|PPP1R9B|EPS8|TPM2|CDC42
GO Biological Process	Actin filament-based process	4.02e-24	3031	7.69e-28	2.33958	GO:0030029	609	78	RALA|BAIAP2L1|ARPC3|VASP|CNN1|HIP1R|PDGFRB|ACTR3|PACSIN2|EHD2|SLC9A1|EHBP1|FARP2|CUL3|NRP1|MYO1E|ABI2|ITGB5|INPPL1|ARF6|CRK|BCR|CTNNA1|FMN2|LLGL1|FMNL3|PLS1|EPB41L1|EZR|RAP1GDS1|DPYSL3|FRMD6|DLG1|ARHGAP12|MINK1|PDLIM7|PLS3|GMFB|TPM1|MYPN|NCKAP1|CALD1|CDC42BPA|UTRN|EPB41L2|RAB13|CNN3|PDLIM1|AMOT|PHACTR4|FGD1|ABI1|FSCN1|WASF1|ARAP1|ITGB1|AMOTL1|ARPC1B|CORO1C|RHOA|SHC1|CDK5|FLNB|AMOTL2|CFL1|ATP1A1|R…
GO Biological Process	Actin polymerization-dependent cell motility	0.0438	3031	0.002	0.135853	GO:0070358	7	3	ARPC3|ACTR3|EPS8
COMPARTMENTS	Actin-based cell projection	3.96e-08	3031	8.09e-10	0.74023	GOCC:0098858	132	21	VASP|ITGAV|ABI2|ARF6|ITGA3|TUBB3|PLS1|EZR|MSN|UTRN|CLIC4|ABI1|FSCN1|ITGB1|TPRN|MYO10|DAG1|PPP1R9B|EPS8|RDX|CDC42
GO Cellular Component	Actin-based cell projection	4.26e-13	3031	8.33e-15	1.23706	GO:0098858	219	34	ACTA2|VASP|EXOC4|ITGAV|MYO1E|IGF2BP1|ABI2|INPPL1|ARF6|ITGA3|FMN2|TUBB3|PLS1|EZR|AP2A1|MSN|UTRN|MPP1|CLIC4|ABI1|FSCN1|ITGB1|TPRN|SLC4A7|CDK5|MYO10|DAG1|PPP1R9B|CYFIP1|FARP1|EPS8|CTNNB1|RDX|CDC42
UniProt Keywords	Actin-binding	2.21e-15	3031	2.96e-17	1.46556	KW-0009	271	41	BAIAP2L1|ARPC3|VASP|CNN1|HIP1R|COTL1|ACTR3|MYO1E|INPPL1|FMN2|LASP1|NEXN|PLS1|EPB41L1|MTSS2|PLS3|TPM1|MYPN|MYLK|CALD1|UTRN|EPB41L2|CNN3|PHACTR4|FSCN1|WASF1|TAGLN|ARPC1B|CORO1C|AFAP1|FLNB|MYO10|CFL1|CNN2|PPP1R9B|PPP1R18|CYFIP1|WASF2|EPS8|RDX|TPM2
Reactome Pathways	Activation of AMPK downstream of NMDARs	0.0028	3031	0.00025	0.255284	HSA-9619483	28	6	TUBB4A|TUBB6|TUBB3|TUBB4B|PRKAB1|TUBA1C
GO Biological Process	Activation of GTPase activity	0.0074	3031	0.00024	0.213077	GO:0090630	121	12	TBC1D17|CRK|BCR|ABR|MTSS2|SCRIB|EPHA2|CORO1C|TBC1D5|TBC1D15|SIPA1L1|BCAS3
Reactome Pathways	Activation of NF-kappaB in B cells	0.002	3031	0.00017	0.269897	HSA-1169091	66	9	PSMC4|PSMD10|PSMA2|PSMC1|PSMD11|PSMD12|MAP3K7|CHUK|PSME1
GO Biological Process	Cell surface receptor signaling pathway	6.7e-05	3031	1.23e-06	0.417393	GO:0007166	2040	93	DVL2|RANBP9|EFNB1|TAB1|CSK|RIPK2|DOK1|ADGRE5|PLCG1|NUMBL|NOTCH2|BCAR3|ITGAV|PDGFRB|SMURF2|CBL|FARP2|CUL3|RAPGEF2|PDCD6|CDH6|NRP1|PIK3C2A|IDE|PXN|IQGAP1|RASA1|EGFR|USP15|FLCN|GNAQ|NRG1|MYO1E|BAX|ITGA5|ITGB5|ITGA2|STAT6|CRK|AXL|CTNNA1|CSPG4|GNAI2|PAK2|ITGA3|MET|TUBB3|PLCB1|PTK2|FERMT2|FYN|EPHB4|EPHA2|CASP8|PLXNB2|MPZL1|PTPRF|MAP3K7|RAP1A|NSDHL|CHUK|STK4|ABI1|SDC1|IL6ST|PLXNA1|ANXA4|ITGB1|ILK|CTNND1…
GO Biological Process	Activation of protein kinase activity	0.0209	3031	0.0008	0.167985	GO:0032147	203	15	CCNB1|TAOK1|MAP2K2|IQGAP1|EGFR|NRG1|MAP2K1|PAK2|PARK7|DLG1|RPLP1|KIF14|MAP3K7|STK4|ABI1
COMPARTMENTS	Actomyosin	5.58e-05	3031	1.67e-06	0.425337	GOCC:0042641	45	10	PXN|PTK2|TPM1|MYLK|CDC42BPA|PDLIM1|AMOT|FSCN1|SEPTIN7|CNN2
GO Cellular Component	Actomyosin	1.62e-06	3031	6.1e-08	0.579048	GO:0042641	72	14	ACTA2|PXN|PTK2|FERMT2|PDLIM7|TPM1|MYLK|CDC42BPA|PDLIM1|AMOT|FSCN1|SEPTIN7|FLNB|CNN2
GO Biological Process	Actomyosin structure organization	2.65e-05	3031	4.33e-07	0.457675	GO:0031032	115	16	CNN1|PDGFRB|CUL3|ITGB5|EPB41L1|FRMD6|TPM1|MYPN|CDC42BPA|EPB41L2|CNN3|PDLIM1|ITGB1|RHOA|CNN2|ACTG1
Reactome Pathways	Adaptive Immune System	1.23e-06	3031	3.14e-08	0.591009	HSA-1280218	758	50	PSMC4|PSMD10|CSK|RIPK2|PSMA2|SEC61B|PLCG1|VASP|CANX|SNAP23|NECTIN2|ITGAV|PSMC1|PSMD11|SMURF2|TUBB4A|CUL3|RAB7A|SH3RF1|UBE2L6|ITGB5|ERAP1|SEC23A|PAK2|TUBB6|TUBB3|NPEPPS|PPP2R1A|AP2A2|TUBB4B|CTSB|ATG7|FYN|PSMD12|AP1B1|AP2A1|MAP3K7|NRAS|RAP1A|CHUK|PSME1|DNM2|PPP3CB|SEC31A|ITGB1|CUL2|PPP2R5D|TUBA1C|YES1|CDC42
GO Biological Process	Adenine metabolic process	0.0106	3031	0.00036	0.197469	GO:0046083	3	3	HPRT1|APRT|GART
TISSUES	Adenocarcinoma cell	1.42e-09	3031	3.27e-11	0.884771	BTO:0000604	568	48	PSMC4|PYGB|YKT6|LRRC59|ADGRE5|NOTCH2|CCT7|TBRG4|PSMC1|AARS1|NRP1|NONO|USP15|NRG1|BCR|CTNNA1|YWHAG|DNAJA2|MET|RPS15A|TUBB3|LASP1|TP53BP2|CTSB|ANXA2|TPM1|PTPN14|NIBAN1|RAB13|STK4|ANXA7|PARD3|ABI1|ITPA|ASMTL|EPHB2|KIAA1522|DDOST|RHOA|MYO10|TXNRD1|RAN|PPP1R18|RPL9|CTNNB1|TPM2|RPS27|ARHGAP35
GO Molecular Function	Adenyl nucleotide binding	3.34e-13	3031	1.22e-15	1.24763	GO:0030554	1566	102	PSMC4|YTHDC2|AHCY|CSK|EHD4|RIPK2|AK1|ACTA2|GALK1|DDX39A|TRAP1|PI4KA|CCT7|PSMC1|MPP5|TAOK1|AARS1|PDGFRB|MAP2K2|ACTR3|EHD2|RAPGEF2|PRKAR2A|ACAT1|PIK3C2A|IDE|PFKL|SCYL1|EGFR|CCT6A|CCT5|UBE2L6|MYO1E|AXL|MAP2K1|BCR|DDX19A|ACAD9|PFAS|DNAJA2|PAK2|MET|TCP1|PKM|FARSA|EIF4A2|ATP11C|SRR|ACSL4|PTK2|MAP4K4|FYN|MINK1|ATP2B4|EPHB4|EPHA2|MYLK|LONP1|CDC42BPA|KIF14|MAP3K7|RARS2|SLK|CHUK|PKN2|CMPK1|STK4|YARS1|NEK6|…
GO Molecular Function	Adenyl ribonucleotide binding	4.99e-13	3031	1.98e-15	1.23019	GO:0032559	1554	101	PSMC4|YTHDC2|CSK|EHD4|RIPK2|AK1|ACTA2|GALK1|DDX39A|TRAP1|PI4KA|CCT7|PSMC1|MPP5|TAOK1|AARS1|PDGFRB|MAP2K2|ACTR3|EHD2|RAPGEF2|PRKAR2A|ACAT1|PIK3C2A|IDE|PFKL|SCYL1|EGFR|CCT6A|CCT5|UBE2L6|MYO1E|AXL|MAP2K1|BCR|DDX19A|ACAD9|PFAS|DNAJA2|PAK2|MET|TCP1|PKM|FARSA|EIF4A2|ATP11C|SRR|ACSL4|PTK2|MAP4K4|FYN|MINK1|ATP2B4|EPHB4|EPHA2|MYLK|LONP1|CDC42BPA|KIF14|MAP3K7|RARS2|SLK|CHUK|PKN2|CMPK1|STK4|YARS1|NEK6|HSPA1…
COMPARTMENTS	Adherens junction	2.13e-11	3031	3.24e-13	1.06716	GOCC:0005912	82	21	SNAP23|NECTIN2|MPP5|CDH2|MYO1E|ABI2|CYTH3|CTNNA1|FERMT2|DLG1|PDLIM7|SCRIB|AFDN|NIBAN2|PARD3|PKP4|CTNND1|MAGI1|PTPRK|TJP2|CTNNB1
GO Cellular Component	Adherens junction	1.85e-20	3031	2.62e-22	1.97328	GO:0005912	177	40	BAIAP2L1|CDC42EP1|SNAP23|NECTIN2|MPP5|AJUBA|RAB10|CDH6|CDH11|CDH2|MYO1E|ABI2|CYTH3|CTNNA1|LLGL1|NEXN|EZR|PARK7|FERMT2|DLG1|ANXA2|PDLIM7|SCRIB|MSN|AFDN|CNN3|PDLIM1|DLG5|NIBAN2|PARD3|PKP4|CTNND1|MAGI1|PTPRK|TJP2|DAG1|PIP5K1C|PPP1R9B|CTNNB1|RDX
KEGG Pathways	Adherens junction	6.21e-11	3031	1.48e-12	1.02069	hsa04520	69	19	NECTIN2|FARP2|IQGAP1|EGFR|CTNNA1|MET|FYN|PTPRF|AFDN|MAP3K7|PARD3|WASF1|CTNND1|RHOA|ACTG1|YES1|WASF2|CTNNB1|CDC42
GO Biological Process	Adherens junction assembly	0.0039	3031	0.00011	0.240894	GO:0034333	14	5	ABI2|PAK2|DLG5|PIP5K1C|CTNNB1
GO Biological Process	Adherens junction organization	2.01e-05	3031	3.23e-07	0.46968	GO:0034332	47	11	CSK|NUMBL|CDH6|CDH11|ABI2|PAK2|FERMT2|DLG5|PIP5K1C|CTNNB1|CDC42
Reactome Pathways	Adherens junctions interactions	3.07e-05	3031	1.3e-06	0.451286	HSA-418990	33	9	NECTIN2|CDH6|CDH11|CDH2|CTNNA1|AFDN|CTNND1|ACTG1|CTNNB1
UniProt Keywords	ADP-ribosylation	0.0302	3031	0.0027	0.151999	KW-0013	101	9	GNAQ|STAT6|GNAI2|GNAI3|XRCC5|RHOA|PARP14|PARP10|ITGA7
KEGG Pathways	Adrenergic signaling in cardiomyocytes	0.0023	3031	0.00035	0.263827	hsa04261	146	13	SLC9A1|GNAQ|GNAI2|PPP2R1A|PLCB1|ATP2B4|TPM1|GNAI3|ATP2B1|PPP2R5D|PLCB3|ATP1A1|TPM2
WikiPathways	Aerobic glycolysis	0.0498	3031	0.0068	0.130277	WP4629	12	3	PKM|SLC2A1|ENO1
WikiPathways	AGE/RAGE pathway	4.38e-05	3031	1.01e-06	0.435853	WP2324	66	12	LGALS3|EGFR|MAP2K1|MMP14|EZR|CASP8|MSN|CHUK|DDOST|RHOA|SHC1|CDC42
Reactome Pathways	Aggrephagy	0.013	3031	0.0017	0.188606	HSA-9646399	42	6	TUBB4A|TUBB6|TUBB3|PARK7|TUBB4B|TUBA1C
InterPro Domains	AH/BAR domain superfamily	6.52e-05	3031	1.27e-07	0.418575	IPR027267	77	14	BAIAP2L1|SNX8|SNX1|PACSIN2|DNMBP|MTSS2|SNX18|SRGAP1|SNX2|SNX9|FCHO2|FNBP1|SRGAP2C|SH3GLB1
WikiPathways	Airway smooth muscle cell contraction	0.0027	3031	0.00019	0.256864	WP4962	16	5	GNAQ|PLCB1|MYLK|GDI1|RHOA
TISSUES	Alimentary canal	6.4e-12	3031	1.06e-13	1.11938	BTO:0000058	2021	115	DVL2|PYGB|AHCY|PSMA2|AK1|ACTA2|RPL19|CD82|CANX|CNN1|HIP1R|LGALS3|CCNB1|CCT7|HACD3|COTL1|SLC12A2|ACTR3|SLC9A1|TUBB4A|PDCD6|TNPO3|SRI|EGFR|CCT6A|NONO|CCT5|AKR1B1|NRG1|RPN1|ANXA5|CTNNA1|DDX19A|YWHAG|TCP1|NQO1|PKM|TUBB3|CTNNAL1|TUFM|PPP2R1A|LASP1|EIF4A2|PLS1|EZR|ACSL4|PARK7|RPS2|DPYSL3|CTSB|ANXA2|RPLP1|RPS3A|TPM1|MYLK|CALD1|VTA1|NHLRC2|CMPK1|ACOT7|AHNAK|SNX2|ITPA|GDI2|SLC25A6|FSCN1|XRCC5|TAGLN|TAGLN3…
UniProt Keywords	Allosteric enzyme	0.0074	3031	0.00055	0.213077	KW-0021	47	7	PYGB|IDE|PFKL|PAK2|UGDH|PKM|SRR
STRING Clusters	alphav-beta3 integrin-vitronectin complex, and Integrin alpha3-beta1 complex	0.0386	3031	0.00096	0.141341	CL:19596	5	3	ITGA5|ITGB5|ITGA3
UniProt Keywords	Alternative splicing	9.02e-09	3031	2.01e-10	0.804479	KW-0025	10313	356	RANBP9|MRI1|PSMC4|TAB1|TPD52L2|AHCY|PSMD10|RIPK2|TBC1D17|AIMP2|SERPINE1|YKT6|GALK1|SLC25A11|CD82|RAB35|SNX17|DOK1|SLC1A4|DDX39A|ADGRE5|PLCG1|TRAP1|CANX|CDC42EP1|SNAP23|TSG101|CNN1|NECTIN2|HIP1R|EXOC4|WDR44|EFR3A|PI4KA|RRAS2|CCNB1|ARF3|PRPH|CCT7|TBRG4|BCAR3|ITGAV|PSMC1|IPO5|MPP5|PSMD11|TAOK1|AARS1|PDGFRB|HACD3|SNX1|SLC12A2|RAB2A|AJUBA|PACSIN2|EHD2|PPP1R12C|SLC9A1|EHBP1|ARCN1|FARP2|CUL3|PDCD6|CDH6|…
KEGG Pathways	Alzheimer disease	0.00031	3031	3.37e-05	0.350864	hsa05010	354	25	DVL2|PSMC4|PSMA2|PSMC1|PSMD11|MAP2K2|TUBB4A|IDE|GNAQ|MAP2K1|TUBB6|TUBB3|PLCB1|TUBB4B|PSMD12|ATP5F1C|CASP8|NRAS|CHUK|SLC25A6|PPP3CB|CDK5|TUBA1C|PLCB3|CTNNB1
WikiPathways	Alzheimers disease	8.55e-05	3031	2.41e-06	0.406803	WP5124	260	23	DVL2|PSMC4|PSMA2|PSMC1|MAP2K2|TUBB4A|IDE|GNAQ|MAP2K1|TUBB6|TUBB3|PLCB1|TUBB4B|PSMD12|CASP8|NRAS|CHUK|SLC25A6|PPP3CB|CDK5|TUBA1C|PLCB3|CTNNB1
WikiPathways	Alzheimers disease and miRNA effects	8.55e-05	3031	2.41e-06	0.406803	WP2059	260	23	DVL2|PSMC4|PSMA2|PSMC1|MAP2K2|TUBB4A|IDE|GNAQ|MAP2K1|TUBB6|TUBB3|PLCB1|TUBB4B|PSMD12|CASP8|NRAS|CHUK|SLC25A6|PPP3CB|CDK5|TUBA1C|PLCB3|CTNNB1
GO Biological Process	Ameboidal-type cell migration	7.49e-06	3031	1.09e-07	0.512552	GO:0001667	197	22	EFNB1|NRP1|PXN|IQGAP1|CDH2|RIC8A|EPHB4|RAB13|TPBG|PKN2|PDLIM1|AMOT|PHACTR4|GIPC1|ITGB1|ILK|AMOTL1|CORO1C|RHOA|AMOTL2|WASF2|CDC42
GO Biological Process	Amide biosynthetic process	0.0023	3031	6.37e-05	0.263827	GO:0043604	536	32	AIMP2|RPL19|AARS1|ACAT1|RPS15A|FARSA|TUFM|EIF4A2|FTSJ1|ACSL4|RPS2|RPLP1|RPS3A|COPS5|RARS2|YARS1|EIF2S2|EIF1AX|GARS1|ASNS|RPL34|GSPT1|AARSD1|RPL6|RPL10|EIF2B1|RPS13|RPS4Y2|RPL9|RPS7|RPL11|RPS27
WikiPathways	Amino acid metabolism in triple-negative breast cancer cells	0.0192	3031	0.002	0.17167	WP5213	7	3	SLC2A1|SLC1A5|PHGDH
KEGG Pathways	Aminoacyl-tRNA biosynthesis	0.0308	3031	0.0096	0.151145	hsa00970	44	5	AARS1|FARSA|RARS2|YARS1|GARS1
GO Biological Process	AMP biosynthetic process	0.0039	3031	0.00011	0.240894	GO:0006167	14	5	HPRT1|PFAS|APRT|GART|ADSL
GO Biological Process	AMP metabolic process	0.00074	3031	1.75e-05	0.313077	GO:0046033	25	7	AK1|HPRT1|PFAS|APRT|GART|ADSL|AMPD2
GO Biological Process	AMP salvage	0.0244	3031	0.00096	0.161261	GO:0044209	5	3	HPRT1|APRT|ADSL
KEGG Pathways	Amyotrophic lateral sclerosis	0.0055	3031	0.0011	0.225964	hsa05014	350	21	PSMC4|PSMA2|PRPH|PSMC1|PSMD11|TUBB4A|NRG1|BAX|TUBB6|TUBB3|TUBB4B|PSMD12|ATP5F1C|ANXA7|OPTN|PPP3CB|RAB1A|ANXA11|CCS|TUBA1C|ACTG1
WikiPathways	Amyotrophic lateral sclerosis (ALS)	0.0407	3031	0.005	0.139041	WP2447	37	5	PRPH|MAP2K2|BAX|PPP3CB|CCS
GO Biological Process	Anatomical structure development	6.84e-15	3031	1.35e-17	1.41649	GO:0048856	5117	233	RALA|DVL2|PSMC4|YTHDC2|EFNB1|TAB1|CSK|RIPK2|AIMP2|SERPINE1|ACTA2|RAB35|SNX17|VASP|TSG101|NECTIN2|NUMBL|HIP1R|EXOC4|LGALS3|RRAS2|CCNB1|NOTCH2|BCAR3|ITGAV|MPP5|TAOK1|AARS1|PDGFRB|SNX1|AJUBA|MAP2K2|PACSIN2|NAPA|SLC9A1|ARCN1|CBL|FARP2|CUL3|RAPGEF2|RAB10|PDCD6|CDH6|NRP1|SRI|ACAT1|PXN|IQGAP1|CDH11|CDH2|SCYL1|RASA1|EGFR|DOCK11|VPS51|ANK3|SH3RF1|FLCN|AKR1B1|NRG1|MYO1E|IGF2BP1|BAX|ITGA5|ABI2|ITGB5|ITGA2|E…
GO Biological Process	Anatomical structure formation involved in morphogenesis	3.35e-07	3031	3.48e-09	0.647496	GO:0048646	938	60	RALA|DVL2|SERPINE1|VASP|NECTIN2|EXOC4|NOTCH2|ITGAV|MPP5|PDGFRB|MAP2K2|CUL3|PDCD6|NRP1|ITGA5|ITGB5|ITGA2|ERAP1|MAP2K1|MMP14|CSPG4|ITGA3|FMNL3|PTK2|ANXA2|SCRIB|EPHB4|TPM1|EPHA2|CASP8|MYPN|PLXNB2|CALD1|PTPN14|AMOT|STK4|PHACTR4|CLIC4|ABI1|PLXNA1|PPP3CB|ITGB1|EPHB2|AGFG1|AMOTL1|NFATC4|SHC1|CDK5|AMOTL2|TXNRD1|DAG1|ITGA7|ACTG1|BCAS3|YAP1|WASF2|RPS7|CTNNB1|MTHFD1|ARHGAP35
GO Biological Process	Anatomical structure morphogenesis	6.95e-16	3031	9.75e-19	1.5158	GO:0009653	2229	136	RALA|DVL2|EFNB1|TAB1|SERPINE1|ACTA2|VASP|NECTIN2|NUMBL|EXOC4|NOTCH2|BCAR3|ITGAV|MPP5|TAOK1|PDGFRB|SNX1|AJUBA|MAP2K2|PACSIN2|CUL3|RAB10|PDCD6|CDH6|NRP1|PXN|IQGAP1|CDH11|CDH2|RASA1|EGFR|VPS51|ANK3|NRG1|MYO1E|IGF2BP1|BAX|ITGA5|ABI2|ITGB5|ITGA2|ERAP1|INPPL1|HPRT1|STAT6|AXL|MAP2K1|BCR|CTNNA1|MMP14|CSPG4|ITGA3|CPNE1|MET|UGDH|TUBB3|LLGL1|RIC8A|PRMT3|NEXN|FMNL3|PLS1|PTK2|FERMT2|MAP4K4|FRMD6|DLG1|ARHGAP12…
COMPARTMENTS	Anchoring junction	2.72e-47	3031	4.72e-50	4.65654	GOCC:0070161	553	103	RALA|RPL19|ARPC3|ADGRE5|VASP|CDC42EP1|SNAP23|CNN1|NECTIN2|RRAS2|BCAR3|ITGAV|MPP5|PDGFRB|AJUBA|MAP2K2|ACTR3|PACSIN2|SLC9A1|RAPGEF2|RAB10|NRP1|PXN|IQGAP1|CDH2|EGFR|ANK3|MYO1E|ITGA5|ABI2|ITGB5|ANXA5|ITGA2|CYTH3|ARF6|MAP2K1|CTNNA1|YWHAG|MMP14|SRP68|CSPG4|ITGA3|DNMBP|RAP2B|MPDZ|LASP1|NEXN|EZR|PTK2|FERMT2|MAP4K4|DLG1|PDLIM7|SCRIB|EPHA2|KIRREL1|MSN|NCKAP1|CDC42BPA|AFDN|RAB13|CNN3|PKN2|PDLIM1|AMOT|NIBAN2…
GO Cellular Component	Anchoring junction	1.12e-53	3031	4.93e-56	5.29508	GO:0070161	1325	160	RALA|BAIAP2L1|CSK|MPP6|RPL19|ARPC3|ADGRE5|VASP|CDC42EP1|SNAP23|CNN1|NECTIN2|PI4KA|RRAS2|BCAR3|ITGAV|MPP5|PDGFRB|HACD3|AJUBA|MAP2K2|ACTR3|PACSIN2|SLC9A1|CBL|RAPGEF2|RAB10|CDH6|NRP1|PRKAR2A|PXN|IQGAP1|CDH11|CDH2|ARL8A|EGFR|ANK3|ZDHHC5|MYO1E|IGF2BP1|ITGA5|ABI2|ITGB5|ANXA5|ITGA2|CYTH3|ARF6|MAP2K1|BCR|ABR|CTNNA1|YWHAG|MMP14|SRP68|CSPG4|PAK2|ITGA3|DNMBP|RAP2B|MPDZ|LLGL1|LASP1|RAB11B|NEXN|EZR|PARK7|PTK2…
GO Molecular Function	Signaling receptor binding	0.00031	3031	4.33e-06	0.350864	GO:0005102	1499	72	RALA|DVL2|EFNB1|RIPK2|NAMPT|SERPINE1|SNX17|PLCG1|TRAP1|CANX|LGALS3|CCNB1|ITGAV|PDGFRB|SNX1|CBL|CUL3|RAPGEF2|SRI|PXN|RASA1|USP15|GNAQ|NRG1|ITGA5|ITGB5|ITGA2|ERAP1|CRK|YWHAG|MMP14|GNAI2|ITGA3|TUBB3|ARHGEF1|PARK7|PTK2|TUBB4B|FERMT2|FYN|GMFB|CASP8|AP2A1|MSN|PTPN14|UTRN|MAP3K7|MPP1|GNAI3|CHUK|ANXA7|YARS1|SNX2|IL6ST|DNM2|GIPC1|PICALM|ITGB1|CTNND1|EPHB2|NFATC4|SHC1|CDK5|ERBIN|SIPA1L1|ITGA7|TLN2|YES1|PPP…
GO Biological Process	Angiogenesis	7.58e-07	3031	8.7e-09	0.612033	GO:0001525	325	31	SERPINE1|NOTCH2|ITGAV|PDGFRB|PDCD6|NRP1|ITGA5|ERAP1|MMP14|CSPG4|FMNL3|PTK2|ANXA2|EPHB4|EPHA2|CASP8|CALD1|AMOT|STK4|CLIC4|ITGB1|EPHB2|AMOTL1|NFATC4|SHC1|AMOTL2|DAG1|ACTG1|BCAS3|WASF2|CTNNB1
InterPro Domains	Angiomotin	0.0433	3031	0.00036	0.136351	IPR009114	3	3	AMOT|AMOTL1|AMOTL2
STRING Clusters	Angiomotin, and Orbital cancer	0.0063	3031	9.26e-05	0.220066	CL:21994	6	4	MPDZ|AMOT|AMOTL1|AMOTL2
InterPro Domains	Angiomotin, C-terminal	0.0433	3031	0.00036	0.136351	IPR024646	3	3	AMOT|AMOTL1|AMOTL2
WikiPathways	Angiopoietin-like protein 8 regulatory pathway	0.0057	3031	0.00046	0.224413	WP3915	131	12	MAP2K2|CBL|PIK3C2A|CRK|MAP2K1|EXOC7|MAP4K4|MINK1|MAP3K7|SHC1|SLC2A1|PRKAB1
TISSUES	Animal	1.94e-39	3031	1.28e-41	3.87122	BTO:0000042	15148	526	ARF5|RALA|BAIAP2L1|DVL2|RANBP9|MRI1|PSMC4|YTHDC2|EFNB1|SNAP29|TAB1|PYGB|TPD52L2|AHCY|PSMD10|RP2|CSK|EHD4|RIPK2|TBC1D17|CDC37|NAMPT|MPP6|SNX8|AIMP2|SERPINE1|PSMA2|YKT6|SEC61B|AK1|ACTA2|RPL19|GALK1|SLC25A11|LRRC59|CD82|ARPC3|RAB35|EXOC2|SNX17|DOK1|SLC1A4|DDX39A|ADGRE5|PLCG1|VASP|TRAP1|CANX|CDC42EP1|PMPCB|SNAP23|TSG101|CNN1|NECTIN2|NUMBL|HIP1R|GRWD1|EXOC4|WDR44|LGALS3|EFR3A|PI4KA|RRAS2|CCNB1|NOTCH2|…
GO Biological Process	Animal organ development	8.57e-08	3031	7.93e-10	0.706702	GO:0048513	3246	146	DVL2|EFNB1|TAB1|CSK|RIPK2|AIMP2|SERPINE1|ACTA2|SNX17|TSG101|NUMBL|EXOC4|NOTCH2|BCAR3|MPP5|AARS1|PDGFRB|MAP2K2|NAPA|SLC9A1|ARCN1|CBL|FARP2|CUL3|RAPGEF2|PDCD6|NRP1|SRI|ACAT1|IQGAP1|CDH2|SCYL1|EGFR|DOCK11|VPS51|FLCN|AKR1B1|NRG1|MYO1E|IGF2BP1|BAX|ABI2|ITGA2|INPPL1|ARF6|HPRT1|COPS2|STAT6|CRK|AXL|MAP2K1|BCR|CTNNA1|MMP14|ITGA3|MET|BASP1|TUBB3|ENO3|BGN|PLS1|PLCB1|SRR|PTK2|CTSB|DLG1|ANXA2|FYN|MINK1|PDLIM7…
GO Biological Process	Animal organ morphogenesis	0.0019	3031	5.09e-05	0.272125	GO:0009887	997	50	DVL2|TAB1|SERPINE1|ACTA2|EXOC4|NOTCH2|BCAR3|PDGFRB|MAP2K2|CUL3|NRP1|CDH2|EGFR|VPS51|NRG1|BAX|ABI2|ITGA2|INPPL1|STAT6|MAP2K1|BCR|CTNNA1|MMP14|PLS1|PTK2|DLG1|SCRIB|EPHB4|TPM1|EPHA2|MSN|MYLK|DLG5|PHACTR4|FGD1|SDC1|PLXNA1|ILK|EPHB2|TPRN|RHOA|TENM3|SERPINH1|DAG1|YAP1|CTNNB1|EIF4A3|CDC42|MTHFD1
GO Molecular Function	Anion binding	3.44e-25	3031	4.18e-28	2.44634	GO:0043168	2404	164	ARF5|RALA|PSMC4|YTHDC2|PYGB|RP2|CSK|EHD4|RIPK2|AK1|ACTA2|GALK1|RAB35|DDX39A|TRAP1|HIP1R|PI4KA|RRAS2|ARF3|CCT7|PSMC1|MPP5|TAOK1|AARS1|PDGFRB|RAB2A|MAP2K2|ACTR3|PACSIN2|EHD2|SLC9A1|TUBB4A|RAPGEF2|RAB10|RAB7A|PRKAR2A|ACAT1|PIK3C2A|IDE|IQGAP1|PFKL|SCYL1|ARL8A|RALB|EGFR|CCT6A|CCT5|QDPR|GNAQ|UBE2L6|MYO1E|RAPGEF6|CYTH3|ARF6|AXL|MAP2K1|BCR|DDX19A|RAB1B|ACAD9|GNAI2|PFAS|DNAJA2|PAK2|MET|TCP1|TUBB6|RAP2B|PK…
InterPro Domains	Annexin	0.0142	3031	8.53e-05	0.184771	IPR001464	13	5	ANXA5|ANXA2|ANXA7|ANXA4|ANXA11
UniProt Keywords	Annexin	0.0015	3031	8.53e-05	0.282391	KW-0041	13	5	ANXA5|ANXA2|ANXA7|ANXA4|ANXA11
InterPro Domains	Annexin repeat	0.0142	3031	8.53e-05	0.184771	IPR018502	13	5	ANXA5|ANXA2|ANXA7|ANXA4|ANXA11
InterPro Domains	Annexin repeat, conserved site	0.0142	3031	8.53e-05	0.184771	IPR018252	13	5	ANXA5|ANXA2|ANXA7|ANXA4|ANXA11
SMART Domains	Annexin repeats	0.0058	3031	8.53e-05	0.223657	SM00335	13	5	ANXA5|ANXA2|ANXA7|ANXA4|ANXA11
InterPro Domains	Annexin superfamily	0.0142	3031	8.53e-05	0.184771	IPR037104	13	5	ANXA5|ANXA2|ANXA7|ANXA4|ANXA11
Monarch Phenotype	Anthropometric measurement	6.56e-05	3031	2.04e-07	0.41831	EFO:0004302	4304	170	YTHDC2|TAB1|AHCY|CSK|EHD4|SERPINE1|YKT6|EXOC2|SNX17|DOK1|PLCG1|TRAP1|NECTIN2|HIP1R|WDR44|RRAS2|BCAR3|TAOK1|AARS1|SMURF2|SLC12A2|MAP2K2|ACTR3|PACSIN2|EHBP1|PDCD6|RAB7A|CDH6|NRP1|PRKAR2A|PIK3C2A|IDE|ANKRD52|VPS37B|PXN|IQGAP1|CDH11|SCYL1|ARL8A|CCT6A|ANK3|SH3RF1|GNAQ|NRG1|MYO1E|IGF2BP1|ITGB5|ANXA5|RAPGEF6|DCBLD1|STAT6|CRK|MAP2K1|BCR|ABR|MMP14|CSPG4|GNAI2|CPNE1|FMN2|MPDZ|NPEPPS|CTNNAL1|LLGL1|DCBLD2|TU…
Reactome Pathways	Antigen processing-Cross presentation	0.00093	3031	6.94e-05	0.303152	HSA-1236975	105	12	PSMC4|PSMD10|PSMA2|SEC61B|SNAP23|ITGAV|PSMC1|PSMD11|ITGB5|PSMD12|CHUK|PSME1
Reactome Pathways	APC/C:Cdc20 mediated degradation of mitotic proteins	0.013	3031	0.0017	0.188606	HSA-176409	75	8	PSMC4|PSMD10|PSMA2|CCNB1|PSMC1|PSMD11|PSMD12|PSME1
Reactome Pathways	APC/C:Cdc20 mediated degradation of Securin	0.0242	3031	0.0036	0.161618	HSA-174154	67	7	PSMC4|PSMD10|PSMA2|PSMC1|PSMD11|PSMD12|PSME1
Reactome Pathways	APC/C:Cdh1 mediated degradation of Cdc20 and other APC/C:Cdh1 targeted proteins in late mitosis/early G1	0.0342	3031	0.0055	0.146597	HSA-174178	73	7	PSMC4|PSMD10|PSMA2|PSMC1|PSMD11|PSMD12|PSME1
KEGG Pathways	Apelin signaling pathway	0.00034	3031	4.05e-05	0.346852	hsa04371	133	14	SERPINE1|ACTA2|RRAS2|MAP2K2|SLC9A1|GNAQ|MAP2K1|GNAI2|PLCB1|MYLK|NRAS|GNAI3|PRKAB1|PLCB3
GO Biological Process	Apical junction assembly	0.00054	3031	1.22e-05	0.326761	GO:0043297	58	10	ABI2|CTNNA1|PAK2|DLG1|AFDN|RAB13|PKN2|DLG5|PARD3|RHOA
COMPARTMENTS	Apical junction complex	1.27e-07	3031	2.7e-09	0.68962	GOCC:0043296	101	18	NECTIN2|MPP5|RAPGEF2|CYTH3|RAP2B|MPDZ|DLG1|SCRIB|RAB13|PKN2|AMOT|PARD3|NHS|CTNND1|AMOTL1|RHOA|TJP2|ACTG1
GO Cellular Component	Apical junction complex	1.07e-08	3031	2.72e-10	0.797062	GO:0043296	151	23	VASP|NECTIN2|MPP5|RAPGEF2|CYTH3|CTNNA1|RAP2B|MPDZ|FRMD6|DLG1|RAB13|PKN2|AMOT|PARD3|NHS|CTNND1|MAGI1|AMOTL1|RHOA|AMOTL2|TJP2|ACTG1|CTNNB1
COMPARTMENTS	Apical part of cell	0.0486	3031	0.0033	0.131336	GOCC:0045177	237	15	PDGFRB|SLC12A2|RAPGEF2|NRG1|RAPGEF6|MPDZ|EZR|MSN|CLIC4|PARD3|NHS|ABCC1|SLC2A1|ATP1A1|RDX
GO Cellular Component	Apical part of cell	5.63e-05	3031	3.03e-06	0.424949	GO:0045177	433	31	DVL2|HIP1R|MPP5|PDGFRB|SLC12A2|SLC9A1|RAPGEF2|CDH2|NRG1|RAPGEF6|CSPG4|MPDZ|EZR|SRR|CTSB|DLG1|MSN|STXBP3|CLIC4|PARD3|NHS|ABCC1|SLC4A7|ATP2B1|SLC2A1|ATP6V1C1|ATP1A1|ACTG1|CTNNB1|RDX|CDC42
COMPARTMENTS	Apical plasma membrane	0.0476	3031	0.0032	0.132239	GOCC:0016324	167	12	PDGFRB|SLC12A2|RAPGEF2|RAPGEF6|MPDZ|EZR|MSN|NHS|ABCC1|SLC2A1|ATP1A1|RDX
GO Cellular Component	Apical plasma membrane	0.0021	3031	0.00015	0.267778	GO:0016324	367	24	HIP1R|MPP5|PDGFRB|SLC12A2|SLC9A1|RAPGEF2|CDH2|NRG1|RAPGEF6|CSPG4|MPDZ|EZR|CTSB|DLG1|MSN|STXBP3|PARD3|NHS|ABCC1|SLC4A7|ATP2B1|SLC2A1|ATP1A1|RDX
Monarch Phenotype	Aplasia/hypoplasia affecting bones of the axial skeleton	0.0023	3031	2.04e-05	0.263827	HP:0009122	751	42	EFNB1|PI4KA|RRAS2|NOTCH2|MPP5|PDGFRB|SLC12A2|ARCN1|CBL|INPPL1|RPS15A|TUBB3|BGN|PSMD12|ANKLE2|MYPN|LONP1|KIF14|MAP3K7|NRAS|GNAI3|NSDHL|CHUK|DPM1|FGD1|ASNS|FAT4|PPP1R12A|RAB3GAP1|RPL10|FLNB|SERPINH1|PLCB3|ITGA7|ACTG1|COASY|PHGDH|CASK|RPS7|RPL11|TPM2|EIF4A3
Monarch Phenotype	Aplasia/hypoplasia involving bones of the extremities	0.0264	3031	0.0005	0.15784	HP:0045060	579	31	NOTCH2|MPP5|SLC12A2|PIK3C2A|CDH11|INPPL1|MET|RPS15A|TUBB3|FTSJ1|BGN|ACSL4|PSMD12|LONP1|MAP3K7|CHUK|DPM1|STXBP1|FGD1|NHS|WASF1|FAT4|GDI1|RAB3GAP1|RPL10|FLNB|CASK|RPS7|RPL11|TPM2|EIF4A3
Monarch Phenotype	Aplasia/hypoplasia involving bones of the upper limbs	0.0182	3031	0.00031	0.173993	HP:0006496	511	29	NOTCH2|MPP5|SLC12A2|PIK3C2A|CDH11|INPPL1|RPS15A|TUBB3|FTSJ1|BGN|ACSL4|PSMD12|LONP1|MAP3K7|CHUK|DPM1|STXBP1|FGD1|NHS|FAT4|GDI1|RAB3GAP1|RPL10|FLNB|CASK|RPS7|RPL11|TPM2|EIF4A3
Monarch Phenotype	Aplasia/Hypoplasia involving the central nervous system	0.0014	3031	9.26e-06	0.285387	HP:0002977	1534	72	EFNB1|SNAP29|AHCY|AIMP2|GALK1|SLC1A4|PMPCB|PI4KA|MPP5|TAOK1|AARS1|PDGFRB|SLC12A2|MAP2K2|ARCN1|TUBB4A|CDH11|CDH2|NONO|VPS51|QDPR|GNAQ|MAP2K1|YWHAG|ITGA3|VPS37A|RPS15A|FMN2|UGDH|TUBB3|TUFM|PPP2R1A|RAB11B|EXOC7|EPB41L1|EZR|ACSL4|PSMD12|ANKLE2|GMPPA|LONP1|CYB5R3|KIF14|NHLRC2|NRAS|RARS2|NSDHL|CHUK|DPM1|ADPRHL2|STXBP1|ITPA|SBF1|ASNS|FAT4|PPP1R12A|RAB3GAP1|RPL10|EIF2B1|SLC2A1|GPHN|DAG1|ACTG1|COASY|ADSL|…
Monarch Phenotype	Aplasia/hypoplasia involving the skeleton	0.0022	3031	1.93e-05	0.265758	HP:0009115	985	51	EFNB1|PI4KA|RRAS2|NOTCH2|MPP5|PDGFRB|SLC12A2|ARCN1|CBL|PIK3C2A|CDH11|INPPL1|MET|RPS15A|TUBB3|FTSJ1|BGN|ACSL4|PSMD12|ANKLE2|MYPN|LONP1|KIF14|MAP3K7|NRAS|GNAI3|NSDHL|CHUK|DPM1|STXBP1|FGD1|NHS|WASF1|ASNS|FAT4|PPP1R12A|GDI1|RAB3GAP1|RPL10|FLNB|SERPINH1|PLCB3|ITGA7|ACTG1|COASY|PHGDH|CASK|RPS7|RPL11|TPM2|EIF4A3
Monarch Phenotype	Aplasia/Hypoplasia of the cerebrum	0.00013	3031	4.99e-07	0.388606	HP:0007364	1300	68	EFNB1|SNAP29|AHCY|AIMP2|GALK1|SLC1A4|PMPCB|PI4KA|MPP5|TAOK1|AARS1|PDGFRB|SLC12A2|MAP2K2|ARCN1|TUBB4A|CDH11|CDH2|NONO|VPS51|QDPR|YWHAG|ITGA3|VPS37A|RPS15A|FMN2|UGDH|TUBB3|TUFM|PPP2R1A|RAB11B|EXOC7|EPB41L1|EZR|ACSL4|PSMD12|ANKLE2|GMPPA|LONP1|CYB5R3|KIF14|NHLRC2|NRAS|RARS2|NSDHL|CHUK|DPM1|STXBP1|ITPA|SBF1|ASNS|FAT4|PPP1R12A|RAB3GAP1|RPL10|EIF2B1|SLC2A1|DAG1|ACTG1|COASY|ADSL|PHGDH|CASK|RPS7|CTNNB1|RP…
Monarch Phenotype	Aplasia/hypoplasia of the extremities	0.0033	3031	3.2e-05	0.248149	HP:0009815	614	36	EFNB1|NOTCH2|MPP5|SLC12A2|ARCN1|PIK3C2A|CDH11|INPPL1|MET|RPS15A|TUBB3|FTSJ1|BGN|ACSL4|PSMD12|LONP1|MAP3K7|NSDHL|CHUK|DPM1|STXBP1|FGD1|NHS|WASF1|FAT4|GDI1|RAB3GAP1|RPL10|FLNB|SERPINH1|PHGDH|CASK|RPS7|RPL11|TPM2|EIF4A3
Monarch Phenotype	Aplasia/Hypoplasia of the mandible	0.0091	3031	0.00013	0.204096	HP:0009118	660	36	PI4KA|RRAS2|NOTCH2|MPP5|PDGFRB|SLC12A2|ARCN1|CBL|RPS15A|TUBB3|PSMD12|ANKLE2|MYPN|KIF14|MAP3K7|NRAS|GNAI3|NSDHL|CHUK|DPM1|ASNS|FAT4|PPP1R12A|RAB3GAP1|RPL10|FLNB|SERPINH1|ITGA7|ACTG1|COASY|PHGDH|CASK|RPS7|RPL11|TPM2|EIF4A3
KEGG Pathways	Apoptosis	0.0391	3031	0.0129	0.140782	hsa04210	131	9	MAP2K2|BAX|MAP2K1|CTSB|CASP8|NRAS|CHUK|TUBA1C|ACTG1
Reactome Pathways	Apoptosis	0.0022	3031	0.00019	0.265758	HSA-109581	175	15	PSMC4|PSMD10|PSMA2|PSMC1|PSMD11|BAX|YWHAG|PAK2|PTK2|TP53BP2|PSMD12|CASP8|PSME1|TJP2|CTNNB1
WikiPathways	Apoptosis-related network due to altered Notch3 in ovarian cancer	0.011	3031	0.0011	0.195861	WP2864	53	7	RIPK2|NRG1|ANXA5|CTNNA1|PAK2|NQO1|PTK2
SMART Domains	ARF-like small GTPases	0.0285	3031	0.00066	0.154516	SM00177	22	5	ARF5|ARF3|ARL8A|ARF6|ARL8B
InterPro Domains	Armadillo-like helical	0.003	3031	1.37e-05	0.252288	IPR011989	230	20	IPO5|TNPO3|SCYL1|DNAAF5|PPP2R1A|COPG1|RIC8A|AP2A2|XPOT|FMNL3|RAP1GDS1|AP1B1|AP2A1|IPO9|MYBBP1A|PKP4|CTNND1|PPP2R5D|CAND1|CTNNB1
InterPro Domains	Armadillo-type fold	0.0033	3031	1.57e-05	0.248149	IPR016024	337	25	EFR3A|PI4KA|IPO5|TNPO3|PIK3C2A|SCYL1|DOCK11|DNAAF5|PPP2R1A|COPG1|RIC8A|AP2A2|XPOT|FMNL3|RAP1GDS1|AP1B1|AP2A1|IPO9|NOC3L|MYBBP1A|PKP4|CTNND1|PPP2R5D|CAND1|CTNNB1
GO Molecular Function	Arp2/3 complex binding	0.0493	3031	0.0011	0.130715	GO:0071933	14	4	GMFB|SNX9|WASF1|WASF2
KEGG Pathways	Arrhythmogenic right ventricular cardiomyopathy	5.26e-05	3031	4.22e-06	0.427901	hsa05412	77	12	ITGAV|CDH2|ITGA5|ITGB5|ITGA2|CTNNA1|ITGA3|ITGB1|DAG1|ITGA7|ACTG1|CTNNB1
WikiPathways	Arrhythmogenic right ventricular cardiomyopathy	9.36e-05	3031	2.93e-06	0.402872	WP2118	74	12	ITGAV|CDH2|ITGA5|ITGB5|ITGA2|CTNNA1|ITGA3|ITGB1|DAG1|ITGA7|ACTG1|CTNNB1
TISSUES	Ascites	0.0027	3031	9.81e-05	0.256864	BTO:0000091	61	9	SRI|PKM|LLGL1|RPS2|ANXA2|RPS3A|RPL10|RPL9|ENO1
Reactome Pathways	Asparagine N-linked glycosylation	0.00016	3031	8.9e-06	0.379588	HSA-446203	304	24	ARF5|YKT6|CANX|ARF3|PSMC1|NAPA|ARCN1|TUBB4A|ANK3|RPN1|SEC23A|RAB1B|TUBB6|TUBB3|NAPG|COPG1|TUBB4B|GMPPA|DPM1|SEC31A|RAB1A|DDOST|TUBA1C|COPE
Reactome Pathways	Signaling by Receptor Tyrosine Kinases	3.91e-17	3031	1.89e-19	1.64078	HSA-9006934	521	60	RALA|RANBP9|CSK|CDC37|PLCG1|ITGAV|PDGFRB|MAP2K2|CBL|NRP1|IDE|PXN|RALB|RASA1|EGFR|NRG1|BAX|ABI2|ITGA2|ARF6|STAT6|CRK|AXL|MAP2K1|CTNNA1|PAK2|ITGA3|MET|PPP2R1A|HNRNPM|AP2A2|HGS|PTK2|FYN|AP2A1|PTPRF|NCKAP1|NRAS|RAP1A|ABI1|DNM2|WASF1|ITGB1|CTNND1|RHOA|SHC1|EPN1|POLR2H|PPP2R5D|CDK5|ERBIN|ATP6V1C1|PTPRK|ACTG1|YES1|YAP1|CYFIP1|WASF2|CTNNB1|CDC42
Reactome Pathways	Association of TriC/CCT with target proteins during biosynthesis	0.0367	3031	0.0061	0.143533	HSA-390471	39	5	CCT7|CCT6A|CCT5|TCP1|CCT4
Reactome Pathways	Asymmetric localization of PCP proteins	0.00036	3031	2.31e-05	0.34437	HSA-4608870	63	10	DVL2|PSMC4|PSMD10|PSMA2|PSMC1|PSMD11|SMURF2|PSMD12|SCRIB|PSME1
GO Molecular Function	ATP binding	8.28e-12	3031	5.04e-14	1.1082	GO:0005524	1491	95	PSMC4|YTHDC2|CSK|EHD4|RIPK2|AK1|ACTA2|GALK1|DDX39A|TRAP1|PI4KA|CCT7|PSMC1|MPP5|TAOK1|AARS1|PDGFRB|MAP2K2|ACTR3|EHD2|PIK3C2A|IDE|PFKL|SCYL1|EGFR|CCT6A|CCT5|UBE2L6|MYO1E|AXL|MAP2K1|BCR|DDX19A|PFAS|DNAJA2|PAK2|MET|TCP1|PKM|FARSA|EIF4A2|ATP11C|SRR|ACSL4|PTK2|MAP4K4|FYN|MINK1|ATP2B4|EPHB4|EPHA2|MYLK|LONP1|CDC42BPA|KIF14|MAP3K7|RARS2|SLK|CHUK|PKN2|CMPK1|STK4|YARS1|NEK6|HSPA1L|PIP4K2A|GART|GARS1|XRCC5|A…
GO Molecular Function	ATP hydrolysis activity	0.0131	3031	0.00024	0.188273	GO:0016887	333	22	PSMC4|YTHDC2|DDX39A|TRAP1|CCT7|PSMC1|CCT6A|CCT5|MYO1E|DDX19A|TCP1|EIF4A2|ATP11C|ATP2B4|LONP1|KIF14|HSPA1L|CCT4|ATP2B1|DDX46|ATP1A1|EIF4A3
UniProt Keywords	ATP-binding	1.71e-12	3031	2.8e-14	1.1767	KW-0067	1379	91	PSMC4|YTHDC2|CSK|EHD4|RIPK2|AK1|ACTA2|GALK1|DDX39A|TRAP1|PI4KA|CCT7|PSMC1|MPP5|TAOK1|AARS1|PDGFRB|MAP2K2|ACTR3|EHD2|PIK3C2A|IDE|PFKL|EGFR|CCT6A|CCT5|MYO1E|AXL|MAP2K1|BCR|DDX19A|PFAS|PAK2|MET|TCP1|PKM|FARSA|EIF4A2|ATP11C|SRR|ACSL4|PTK2|MAP4K4|FYN|MINK1|ATP2B4|EPHB4|EPHA2|MYLK|LONP1|CDC42BPA|KIF14|MAP3K7|RARS2|SLK|CHUK|PKN2|CMPK1|STK4|YARS1|NEK6|HSPA1L|PIP4K2A|GART|GARS1|XRCC5|ASNS|CCT4|ILK|ABCC1|E…
GO Molecular Function	ATP-dependent protein folding chaperone	0.0037	3031	5.7e-05	0.24318	GO:0140662	31	7	CCT7|CCT6A|CCT5|TCP1|HSPA1L|CCT4|HSPH1
Monarch Phenotype	Atrophy/Degeneration affecting the central nervous system	0.0293	3031	0.00057	0.153313	HP:0007367	744	37	AIMP2|SLC1A4|MPP5|TAOK1|AARS1|SLC12A2|MAP2K2|CCT5|GNAQ|MAP2K1|YWHAG|FMN2|EXOC7|EPB41L1|EZR|PSMD12|LONP1|CYB5R3|NHLRC2|RARS2|ADPRHL2|STXBP1|OPTN|ITPA|SBF1|ANXA11|RAB3GAP1|EIF2B1|SLC2A1|GPHN|ACTG1|COASY|ADSL|UBAP1|CASK|CDC42|AMPD2
Reactome Pathways	AUF1 (hnRNP D0) binds and destabilizes mRNA	0.0095	3031	0.0012	0.202228	HSA-450408	54	7	PSMC4|PSMD10|PSMA2|PSMC1|PSMD11|PSMD12|PSME1
Monarch Phenotype	Autistic behavior	0.0324	3031	0.00066	0.148945	HP:0000729	460	26	MPP5|TAOK1|AARS1|SLC12A2|CDH2|NONO|ANK3|GNAQ|YWHAG|FMN2|TUBB3|FTSJ1|EPB41L1|EZR|ACSL4|PARK7|PSMD12|STXBP1|NHS|GDI1|RPL10|SLC2A1|PPP2R5D|ADSL|CASK|CTNNB1
Reactome Pathways	Autodegradation of Cdh1 by Cdh1:APC/C	0.0185	3031	0.0026	0.173283	HSA-174084	63	7	PSMC4|PSMD10|PSMA2|PSMC1|PSMD11|PSMD12|PSME1
Reactome Pathways	Autodegradation of the E3 ubiquitin ligase COP1	0.0076	3031	0.00086	0.211919	HSA-349425	51	7	PSMC4|PSMD10|PSMA2|PSMC1|PSMD11|PSMD12|PSME1
Monarch Phenotype	Autoimmune disease biomarker	4.2e-05	3031	1.07e-07	0.437675	EFO:0006846	626	43	SNX8|ADGRE5|CNN1|NECTIN2|EXOC4|PI4KA|TAOK1|PACSIN2|RALB|DOCK11|ITGA2|ERAP1|MAP2K1|PCDHGC3|NQO1|NPEPPS|PDIA5|PLCB1|ACSL4|SEPTIN6|PLS3|TPM1|TSC22D2|NIBAN1|TAGLN2|ARHGAP18|STK4|MAPRE1|HSPA1L|SNX2|TRIM5|PICALM|ARAP1|FCHO2|TBC1D5|AFAP1|DENND2B|TUBA1C|CNN2|YES1|PDCD5|PCDHGB5|DOCK10
GO Biological Process	Autophagy	0.00014	3031	2.82e-06	0.385387	GO:0006914	303	25	SNAP29|RIPK2|TBC1D17|TSG101|RAB7A|VPS37B|VPS51|RAB1B|VPS37A|HGS|RAB12|PARK7|ATG7|VTA1|ANXA7|PIP4K2A|OPTN|TRIM5|ATG4B|RAB1A|TBC1D5|NSFL1C|BCAS3|ARL8B|SH3GLB1
Reactome Pathways	Autophagy	0.0041	3031	0.00039	0.238722	HSA-9612973	148	13	TSG101|TUBB4A|VPS37B|VPS37A|TUBB6|TUBB3|PARK7|TUBB4B|ATG7|ATG4B|PRKAB1|TUBA1C|UBAP1
UniProt Keywords	Autophagy	0.0079	3031	0.00063	0.210237	KW-0072	156	13	SNAP29|TBC1D17|RAB7A|RAB1B|RAB12|PARK7|ATG7|OPTN|TRIM5|ATG4B|RAB1A|TBC1D5|SH3GLB1
KEGG Pathways	Autophagy - animal	0.0069	3031	0.0015	0.216115	hsa04140	131	11	SNAP29|RRAS2|MAP2K2|RAB7A|MAP2K1|CTSB|ATG7|MAP3K7|NRAS|ATG4B|RAB1A
GO Cellular Component	Axon	1.39e-09	3031	3.25e-11	0.885699	GO:0030424	651	52	CANX|EXOC4|PRPH|MPP5|CBL|TUBB4A|NRP1|IQGAP1|ARL8A|ANK3|NRG1|IGF2BP1|ITGA2|DIP2B|BCR|ABR|ITGA3|BASP1|TUBB3|LLGL1|NEXN|EXOC7|PARK7|SEPTIN6|DPYSL3|DLG1|MINK1|MYPN|COMT|TPBG|NCS1|STXBP1|PARD3|ABI1|SEPTIN8|FSCN1|DNM2|GARS1|CTNND1|EPHB2|GDI1|RHOA|CDK5|TENM3|CFL1|DAG1|ATP1A1|ACTG1|PPP1R9B|ARL8B|CYFIP1|EPS8
GO Biological Process	Axon development	0.0001	3031	2.01e-06	0.4	GO:0061564	402	30	EFNB1|VASP|NUMBL|NOTCH2|RAB10|NRP1|CDH11|ANK3|CTNNA1|TUBB3|LLGL1|NEXN|PTK2|FYN|EPHB4|EPHA2|MYPN|PLXNB2|STXBP1|NIBAN2|PARD3|PICALM|PLXNA1|PPP3CB|ITGB1|EPHB2|CDK5|DAG1|CYFIP1|ARHGAP35
GO Biological Process	Axon guidance	0.0018	3031	4.78e-05	0.274473	GO:0007411	232	19	EFNB1|VASP|NOTCH2|NRP1|TUBB3|NEXN|PTK2|FYN|EPHB4|EPHA2|MYPN|PLXNB2|NIBAN2|PLXNA1|EPHB2|CDK5|DAG1|CYFIP1|ARHGAP35
KEGG Pathways	Axon guidance	1.03e-09	3031	3.38e-11	0.898716	hsa04360	176	26	EFNB1|PLCG1|NRP1|RASA1|GNAI2|PAK2|MET|PTK2|FYN|SRGAP1|EPHB4|EPHA2|PLXNB2|NRAS|GNAI3|PARD3|PLXNA1|PPP3CB|ITGB1|ILK|EPHB2|NFATC4|RHOA|CDK5|CFL1|CDC42
Reactome Pathways	Axon guidance	3.94e-29	3031	6.9e-32	2.84045	HSA-422475	551	80	RANBP9|PSMC4|EFNB1|PSMD10|PSMA2|RPL19|ARPC3|DOK1|PLCG1|VASP|ITGAV|PSMC1|PSMD11|MAP2K2|ACTR3|FARP2|TUBB4A|NRP1|PRKAR2A|RASA1|EGFR|ANK3|ITGA5|ITGA2|MAP2K1|PAK2|MET|RPS15A|TUBB6|TUBB3|AP2A2|EZR|PTK2|TUBB4B|RPS2|DPYSL3|DLG1|RPLP1|RPS3A|FYN|SRGAP1|PDLIM7|PSMD12|EPHB4|EPHA2|AP2A1|MSN|NRAS|PSME1|DNM2|PLXNA1|RPL34|PPP3CB|ITGB1|EPHB2|ARPC1B|GSPT1|RHOA|SHC1|RPL6|RPL10|CUL2|CDK5|MYO10|CFL1|RPS13|DAG1|TUBA1C…
STRING Clusters	Axon guidance	0.0203	3031	0.0004	0.16925	CL:18196	75	9	EFNB1|FARP2|NRP1|SRGAP1|EPHB4|EPHA2|PLXNB2|PLXNA1|EPHB2
GO Biological Process	Axonogenesis	4.78e-05	3031	8.39e-07	0.432057	GO:0007409	363	29	EFNB1|VASP|NUMBL|NOTCH2|RAB10|NRP1|CDH11|ANK3|TUBB3|LLGL1|NEXN|PTK2|FYN|EPHB4|EPHA2|MYPN|PLXNB2|STXBP1|NIBAN2|PARD3|PICALM|PLXNA1|PPP3CB|ITGB1|EPHB2|CDK5|DAG1|CYFIP1|ARHGAP35
GO Cellular Component	Azurophil granule	0.047	3031	0.0048	0.13279	GO:0042582	154	11	SNAP29|PYGB|SNAP23|ARL8A|CPNE1|TUBB4B|ANXA2|CYB5R3|GDI2|ANXA11|DDOST
GO Biological Process	Enzyme-linked receptor protein signaling pathway	7.53e-09	3031	5.81e-11	0.812321	GO:0007167	641	51	EFNB1|TAB1|DOK1|PLCG1|NOTCH2|BCAR3|PDGFRB|SMURF2|CBL|RAPGEF2|PDCD6|NRP1|PIK3C2A|IDE|PXN|IQGAP1|RASA1|EGFR|USP15|FLCN|NRG1|MYO1E|ITGB5|STAT6|CRK|AXL|CSPG4|PAK2|MET|PLCB1|PTK2|FERMT2|FYN|EPHB4|EPHA2|MPZL1|PTPRF|MAP3K7|ABI1|IL6ST|EPHB2|STON1|NFATC4|SHC1|ERBIN|PTPRK|C2CD5|SIPA1L1|YES1|CTNNB1|JAK1
TISSUES	B-cell lymphoma cell	3.66e-07	3031	9.52e-09	0.643652	BTO:0001690	139	20	SLC25A11|CANX|PSMD11|DNAAF5|RAB1B|PKM|FARSA|XPOT|RAB11B|IPO9|YARS1|MAPRE1|SLC25A6|CCT4|POLR2H|CFL1|ACTG1|ARL8B|CYFIP1|PHGDH
KEGG Pathways	Bacterial invasion of epithelial cells	3.97e-12	3031	2.37e-14	1.14012	hsa05100	70	21	ARPC3|CBL|ITGA5|CRK|CTNNA1|MET|PTK2|SEPTIN6|SEPTIN8|DNM2|WASF1|ITGB1|ILK|ARPC1B|RHOA|SHC1|ACTG1|SEPTIN2|WASF2|CTNNB1|CDC42
InterPro Domains	Band 4.1 domain	1.23e-06	3031	1.37e-09	0.591009	IPR019749	51	14	FARP2|EPB41L1|EZR|PTK2|FERMT2|FRMD6|MSN|PTPN14|EPB41L2|MYO10|TLN2|FARP1|RDX|JAK1
SMART Domains	Band 4.1 homologues	2.07e-06	3031	7.56e-09	0.568403	SM00295	49	13	FARP2|EPB41L1|EZR|PTK2|FRMD6|MSN|PTPN14|EPB41L2|MYO10|TLN2|FARP1|RDX|JAK1
COMPARTMENTS	Basal part of cell	0.00029	3031	1.03e-05	0.35376	GOCC:0045178	133	15	SLC12A2|EGFR|ANK3|MET|EZR|DLG1|PHLDB1|ABCC1|SLC4A7|ATP2B1|PHLDB2|SLC2A1|ERBIN|ATP1A1|CTNNB1
GO Cellular Component	Basal part of cell	7.88e-08	3031	2.16e-09	0.710347	GO:0045178	269	29	SLC12A2|SLC9A1|IDE|CDH2|EGFR|ANK3|ITGA2|ITGA3|MET|EZR|DLG1|ANXA2|SCRIB|ATP2B4|MSN|PHLDB1|STXBP3|ABCC1|SLC4A7|ATP2B1|PHLDB2|SLC2A1|ERBIN|DAG1|SLC1A5|ATP1A1|WASF2|CASK|CTNNB1
COMPARTMENTS	Basal plasma membrane	0.0018	3031	7.87e-05	0.274473	GOCC:0009925	124	13	SLC12A2|EGFR|ANK3|MET|EZR|DLG1|ABCC1|SLC4A7|ATP2B1|SLC2A1|ERBIN|ATP1A1|CTNNB1
GO Cellular Component	Basal plasma membrane	8.92e-07	3031	3.1e-08	0.604964	GO:0009925	251	26	SLC12A2|SLC9A1|IDE|CDH2|EGFR|ANK3|ITGA3|MET|EZR|DLG1|ANXA2|SCRIB|ATP2B4|MSN|STXBP3|ABCC1|SLC4A7|ATP2B1|SLC2A1|ERBIN|DAG1|SLC1A5|ATP1A1|WASF2|CASK|CTNNB1
GO Cellular Component	Basolateral plasma membrane	1.78e-06	3031	6.87e-08	0.574958	GO:0016323	226	24	SLC12A2|SLC9A1|IDE|CDH2|EGFR|ANK3|ITGA3|EZR|DLG1|ANXA2|SCRIB|ATP2B4|MSN|STXBP3|ABCC1|SLC4A7|ATP2B1|SLC2A1|ERBIN|DAG1|ATP1A1|WASF2|CASK|CTNNB1
Monarch Phenotype	Behavioral abnormality	0.0053	3031	6.45e-05	0.227572	HP:0000708	1839	79	AHCY|RP2|AIMP2|SLC25A11|SLC1A4|PMPCB|PI4KA|MPP5|TAOK1|AARS1|PDGFRB|SLC12A2|ARCN1|TUBB4A|ACAT1|PIK3C2A|CDH2|NONO|VPS51|ANK3|QDPR|GNAQ|MYO1E|HPRT1|YWHAG|MET|VPS37A|FMN2|UGDH|TUBB3|PPP2R1A|FTSJ1|RAB11B|EPB41L1|PLCB1|EZR|ACSL4|PARK7|PSMD12|AP1B1|CASP8|MYPN|LONP1|CYB5R3|KIF14|NHLRC2|NRAS|GNAI3|NSDHL|STXBP1|FGD1|OPTN|NHS|ITPA|SNX9|WASF1|FAT4|MAGI1|PPP1R12A|TKT|GDI1|ANXA11|RPL10|EIF2B1|SLC2A1|GPHN|PPP2R…
InterPro Domains	Beta tubulin, autoregulation binding site	0.0462	3031	0.00041	0.133536	IPR013838	10	4	TUBB4A|TUBB6|TUBB3|TUBB4B
Reactome Pathways	Beta-catenin independent WNT signaling	8.89e-06	3031	3.19e-07	0.50511	HSA-3858494	143	18	DVL2|PSMC4|PSMD10|PSMA2|PSMC1|PSMD11|SMURF2|AP2A2|PLCB1|PSMD12|SCRIB|AP2A1|MAP3K7|PSME1|PPP3CB|RHOA|PLCB3|CTNNB1
COMPARTMENTS	Bicellular tight junction	0.00047	3031	1.77e-05	0.33279	GOCC:0005923	75	11	RAPGEF2|CYTH3|RAP2B|MPDZ|DLG1|RAB13|AMOT|PARD3|NHS|AMOTL1|TJP2
GO Cellular Component	Bicellular tight junction	2.75e-05	3031	1.42e-06	0.456067	GO:0005923	127	16	VASP|MPP5|RAPGEF2|CYTH3|RAP2B|MPDZ|DLG1|RAB13|AMOT|PARD3|NHS|MAGI1|AMOTL1|AMOTL2|TJP2|CTNNB1
GO Molecular Function	Binding	4.66e-26	3031	3.78e-29	2.53316	GO:0005488	12838	468	ARF5|RALA|BAIAP2L1|DVL2|RANBP9|MRI1|PSMC4|YTHDC2|EFNB1|SNAP29|TAB1|PYGB|TPD52L2|AHCY|PSMD10|RP2|CSK|EHD4|RIPK2|CDC37|NAMPT|SNX8|SERPINE1|YKT6|SEC61B|AK1|ACTA2|RPL19|GALK1|SLC25A11|LRRC59|ARPC3|RAB35|EXOC2|SNX17|DDX39A|ADGRE5|PLCG1|VASP|TRAP1|CANX|CDC42EP1|PMPCB|SNAP23|TSG101|CNN1|NECTIN2|HIP1R|GRWD1|EXOC4|LGALS3|PI4KA|RRAS2|CCNB1|NOTCH2|ARF3|CCT7|TBRG4|BCAR3|ITGAV|PSMC1|IPO5|MPP5|TAOK1|ANKRD13A|A…
GO Biological Process	Binding of sperm to zona pellucida	0.029	3031	0.0012	0.15376	GO:0007339	39	6	CCT7|PRKAR2A|CCT5|TCP1|HSPA1L|CCT4
GO Biological Process	Biological process involved in interaction with host	1.09e-06	3031	1.29e-08	0.596257	GO:0051701	157	21	TSG101|NECTIN2|ITGAV|CBL|RAB7A|NRP1|IDE|VPS37B|EGFR|ITGA5|ITGB5|ITGA2|AXL|TCP1|CTSB|ATG7|EPHA2|ITGB1|DAG1|SLC1A5|ARL8B
GO Biological Process	Biological process involved in interspecies interaction between organisms	0.0015	3031	3.93e-05	0.282391	GO:0044419	1490	68	BAIAP2L1|YTHDC2|RIPK2|SERPINE1|PSMA2|ACTA2|TSG101|NECTIN2|LGALS3|PI4KA|NOTCH2|ITGAV|COTL1|ACTR3|CBL|RAB7A|NRP1|IDE|VPS37B|EGFR|NONO|CCT5|ZDHHC5|BAX|ITGA5|ITGB5|ITGA2|ERAP1|CRK|AXL|BCR|TCP1|RPS15A|SRR|PTK2|TUBB4B|CTSB|ATG7|FYN|EPHA2|CASP8|PCBP2|STXBP3|CHUK|STXBP1|OPTN|TRIM5|XRCC5|ITGB1|RAB2B|EPHB2|AKAP12|RAB1A|RHOA|SHC1|PARP14|FLNB|ERBIN|CFL1|DAG1|SLC1A5|ACTG1|YES1|SIRPA|ARL8B|ENO1|CDC42|JAK1
GO Biological Process	Biological process involved in symbiotic interaction	1.14e-05	3031	1.72e-07	0.49431	GO:0044403	257	25	YTHDC2|TSG101|NECTIN2|PI4KA|ITGAV|CBL|RAB7A|NRP1|IDE|VPS37B|EGFR|ITGA5|ITGB5|ITGA2|AXL|TCP1|CTSB|ATG7|EPHA2|ITGB1|CFL1|DAG1|SLC1A5|ARL8B|CDC42
GO Biological Process	Biological regulation	7.1e-08	3031	6.52e-10	0.714874	GO:0065007	12385	407	RALA|BAIAP2L1|DVL2|RANBP9|PSMC4|YTHDC2|EFNB1|SNAP29|TAB1|TPD52L2|PSMD10|RP2|CSK|EHD4|RIPK2|TBC1D17|CDC37|NAMPT|AIMP2|SERPINE1|ACTA2|LRRC59|ARPC3|RAB35|EXOC2|SNX17|DOK1|ADGRE5|PLCG1|VASP|TRAP1|CDC42EP1|SNAP23|TSG101|CNN1|NECTIN2|NUMBL|HIP1R|EXOC4|LGALS3|PI4KA|RRAS2|CCNB1|NOTCH2|CCT7|TBRG4|BCAR3|ITGAV|PSMC1|IPO5|MPP5|TAOK1|ANKRD13A|AARS1|PDGFRB|HACD3|SNX1|COTL1|SMURF2|SLC12A2|AJUBA|MAP2K2|ACTR3|PAC…
KEGG Pathways	Biosynthesis of amino acids	0.0066	3031	0.0014	0.218046	hsa01230	73	8	PFKL|RPIA|PKM|ENO3|ASNS|TKT|PHGDH|ENO1
GO Biological Process	Biosynthetic process	0.0302	3031	0.0012	0.151999	GO:0009058	2506	94	MRI1|NAMPT|AIMP2|AK1|RPL19|EFR3A|PI4KA|AARS1|PDGFRB|HACD3|AJUBA|ACAT1|PIK3C2A|PGD|QDPR|AKR1B1|ZDHHC5|ATP5MF|RPN1|INPPL1|HPRT1|COPS2|PFAS|RPS15A|UGDH|NQO1|FARSA|TUFM|EIF4A2|FTSJ1|SRR|ACSL4|PARK7|RPS2|DLG1|ANXA2|RPLP1|RPS3A|ATG7|ATP5F1C|COPS5|GMPPA|CYB5R3|MPP1|RARS2|NSDHL|DPM1|CMPK1|YARS1|EIF2S2|PIP4K2A|SRM|ACOT7|APRT|EIF1AX|GART|GARS1|ASNS|RPL34|NFATC4|TKT|NFIC|GSPT1|DDOST|AARSD1|RPL6|MPST|RPL10|P…
TISSUES	Blood	2.84e-23	3031	2.81e-25	2.25467	BTO:0000089	1824	134	RALA|PSMC4|PYGB|TPD52L2|AHCY|NAMPT|RPL19|CD82|ARPC3|SNX17|DOK1|ADGRE5|PLCG1|VASP|CANX|SNAP23|NOTCH2|CCT7|IPO5|PSMD11|TAOK1|COTL1|MAP2K2|ACTR3|NAPA|SLC9A1|TUBB4A|PRKAR2A|PFKL|PGD|CCT6A|NONO|CCT5|GNAQ|ITGA2|ERAP1|ARF6|MAP2K1|BCR|YWHAG|ARHGAP1|ACAD9|PAK2|TCP1|RPS15A|RAP2B|PKM|FARSA|TUFM|LASP1|HNRNPM|RASA3|RAP1GDS1|PTK2|TUBB4B|SEPTIN6|RPS2|CTSB|ANXA2|RPS3A|FYN|MINK1|PDLIM7|PSMD12|ATP2B4|CASP8|KIRREL1…
TISSUES	Blood cancer cell	5.12e-21	3031	5.48e-23	2.02907	BTO:0000580	1234	103	DVL2|AHCY|NAMPT|SEC61B|RPL19|SLC25A11|CD82|DDX39A|PLCG1|VASP|CANX|TSG101|NECTIN2|NUMBL|NOTCH2|ITGAV|PSMD11|AARS1|MAP2K2|PPP1R12C|SLC9A1|CBL|CUL3|TNPO3|PXN|IQGAP1|RASA1|NONO|CCT5|ANK3|AKR1B1|ITGA5|ANXA5|ITGA2|DNAAF5|BCR|RAB1B|PKM|FARSA|LASP1|HNRNPM|EIF4A2|XPOT|RAB11B|RASA3|ARHGEF1|PTK2|RPS3A|ATG7|FYN|ATP2B4|PCBP2|MSN|LONP1|IPO9|AFDN|GLRX3|MAP3K7|MPP1|NRAS|YARS1|EIF2S2|MAPRE1|PIP4K2A|APRT|GDI2|SBF1…
TISSUES	Blood plasma	4.58e-25	3031	3.97e-27	2.43391	BTO:0000131	424	65	RALA|PYGB|ARPC3|SNX17|DOK1|VASP|CANX|SNAP23|PSMD11|TAOK1|COTL1|MAP2K2|NAPA|SLC9A1|PRKAR2A|PFKL|CCT6A|ITGA2|BCR|YWHAG|ARHGAP1|PAK2|TCP1|RAP2B|PKM|FARSA|TUFM|LASP1|RASA3|SEPTIN6|FYN|MINK1|PDLIM7|PSMD12|MSN|MYLK|TAGLN2|MAP3K7|RAP1A|PDLIM1|YARS1|CLIC4|ABI1|APRT|IL6ST|CCT4|AGFG1|RAB1A|PPP1R12A|ARPC1B|TKT|RHOA|ERBIN|CFL1|TJP2|PRKAB1|RAN|CNN2|ACTG1|COASY|EHD1|SEPTIN2|MTHFD1|AMPD2|ARHGAP35
TISSUES	Blood platelet	8.55e-24	3031	7.76e-26	2.3068	BTO:0000132	363	59	RALA|PYGB|ARPC3|SNX17|DOK1|VASP|CANX|SNAP23|TAOK1|COTL1|MAP2K2|NAPA|SLC9A1|PFKL|CCT6A|ITGA2|BCR|YWHAG|ARHGAP1|PAK2|TCP1|RAP2B|PKM|TUFM|LASP1|RASA3|SEPTIN6|FYN|MINK1|PDLIM7|MSN|MYLK|TAGLN2|MAP3K7|RAP1A|PDLIM1|YARS1|CLIC4|ABI1|APRT|IL6ST|CCT4|AGFG1|RAB1A|PPP1R12A|ARPC1B|TKT|RHOA|CFL1|TJP2|RAN|CNN2|ACTG1|COASY|EHD1|SEPTIN2|MTHFD1|AMPD2|ARHGAP35
Monarch Phenotype	Blood pressure	0.0031	3031	2.93e-05	0.250864	EFO:0004325	1138	56	CSK|EHD4|MPP6|PLCG1|EXOC4|BCAR3|PSMD11|ANKRD13A|FARP2|PIK3C2A|CCT6A|ANK3|NRG1|ITGB5|ERAP1|DCBLD1|CRK|DIP2B|MMP14|VPS37A|NUDC|PLCB1|PTK2|FERMT2|ATG7|FYN|PLXNB2|COMT|TSC22D2|CDC42BPA|EPB41L2|PKN2|DNAJB4|NIBAN2|PHACTR4|BICC1|PALM2AKAP2|PLXNA1|CTNND1|NFATC4|SLC4A7|ATP2B1|PHLDB2|AFAP1|FNBP1|TENM3|ARL15|DENND2B|PLCB3|TLN2|YES1|BCAS3|WASF2|UBAP1|COBLL1|HSPA12A
GO Biological Process	Blood vessel development	3.39e-08	3031	2.94e-10	0.74698	GO:0001568	505	43	TAB1|SERPINE1|ACTA2|SNX17|NOTCH2|ITGAV|PDGFRB|RAPGEF2|PDCD6|NRP1|CDH2|RASA1|MYO1E|BAX|ITGA5|ERAP1|MAP2K1|MMP14|CSPG4|FMNL3|PTK2|ANXA2|EPHB4|EPHA2|CASP8|MYLK|CALD1|NSDHL|AMOT|STK4|CLIC4|ITGB1|EPHB2|AMOTL1|NFATC4|SHC1|AMOTL2|DAG1|ACTG1|BCAS3|YAP1|WASF2|CTNNB1
GO Biological Process	Blood vessel morphogenesis	2.22e-07	3031	2.16e-09	0.665365	GO:0048514	419	37	SERPINE1|NOTCH2|ITGAV|PDGFRB|PDCD6|NRP1|CDH2|RASA1|MYO1E|BAX|ITGA5|ERAP1|MMP14|CSPG4|FMNL3|PTK2|ANXA2|EPHB4|EPHA2|CASP8|MYLK|CALD1|AMOT|STK4|CLIC4|ITGB1|EPHB2|AMOTL1|NFATC4|SHC1|AMOTL2|DAG1|ACTG1|BCAS3|YAP1|WASF2|CTNNB1
Monarch Phenotype	BMI-adjusted waist circumference	0.0377	3031	0.00079	0.142366	EFO:0007789	814	39	EHD4|TRAP1|HIP1R|TAOK1|MAP2K2|ACTR3|PDCD6|ANXA5|DCBLD1|CTNNAL1|LLGL1|PDIA5|EPB41L1|CTSB|DLG1|CDC42BPA|PKN2|PALM2AKAP2|ACOT7|AHNAK|IL6ST|ARAP1|ABCC1|STON1|NFATC4|TKT|RHOA|EIF2B1|GPHN|FLNB|CFL1|ARL15|SERPINH1|DAG1|BCAS3|CDC42EP3|COBLL1|HSPA12A|DOCK10
Monarch Phenotype	Body height	0.0042	3031	4.77e-05	0.237675	EFO:0004339	2091	88	TAB1|AHCY|EHD4|SERPINE1|DOK1|PLCG1|HIP1R|RRAS2|AARS1|SMURF2|MAP2K2|PACSIN2|PDCD6|CDH6|PRKAR2A|PIK3C2A|ANKRD52|IQGAP1|CDH11|CCT6A|ANK3|NRG1|MYO1E|IGF2BP1|ITGB5|RAPGEF6|DCBLD1|STAT6|CRK|BCR|ABR|MMP14|GNAI2|FMN2|NPEPPS|DCBLD2|COPG1|EPB41L1|MAP4K4|ARHGAP12|SRGAP1|PDLIM7|MYPN|PTPRF|MCMBP|CYB5R3|IPO9|PTPN14|VTA1|EPB41L2|NRAS|PKN2|DNAJB4|NOC3L|DLG5|STK4|BICC1|PALM2AKAP2|PARD3|PIP4K2A|SEPTIN8|IL6ST|DNM2|…
Monarch Phenotype	Body weights and measures	5.06e-05	3031	1.45e-07	0.429585	EFO:0004324	4122	165	YTHDC2|TAB1|AHCY|CSK|EHD4|SERPINE1|YKT6|EXOC2|SNX17|DOK1|PLCG1|TRAP1|NECTIN2|HIP1R|RRAS2|BCAR3|TAOK1|AARS1|SMURF2|MAP2K2|ACTR3|PACSIN2|EHBP1|PDCD6|CDH6|NRP1|PRKAR2A|PIK3C2A|IDE|ANKRD52|VPS37B|IQGAP1|CDH11|SCYL1|ARL8A|CCT6A|ANK3|SH3RF1|GNAQ|NRG1|MYO1E|IGF2BP1|ITGB5|ANXA5|RAPGEF6|DCBLD1|STAT6|CRK|MAP2K1|BCR|ABR|MMP14|CSPG4|GNAI2|CPNE1|FMN2|MPDZ|NPEPPS|CTNNAL1|LLGL1|DCBLD2|TUFM|PDIA5|COPG1|RAB11B|EP…
TISSUES	Bone	1.02e-06	3031	2.82e-08	0.59914	BTO:0000140	165	21	RRAS2|PKM|BGN|RPS2|CTSB|ANXA2|RPS3A|STK4|YARS1|XRCC5|TAGLN|RPL34|ATP2B1|RHOA|RPL6|CFL1|RPS13|ITGA7|ACTG1|RPL9|ENO1
Monarch Phenotype	Bone density	0.0037	3031	3.68e-05	0.24318	EFO:0003923	1038	52	EHD4|SNX8|RAB35|ARF3|IPO5|COTL1|SLC12A2|PRKAR2A|CDH11|ANK3|FLCN|NRG1|ABI2|ITGB5|AXL|ABR|MMP14|ARHGAP1|FMN2|MPDZ|CTSB|DLG1|ATG7|FILIP1L|AP1B1|MCMBP|PHLDB1|PTPN14|EPB41L2|ARHGAP18|PKN2|NIBAN2|NEK6|BICC1|PARD3|AHNAK|AKAP12|MAGI1|NFIC|FLNB|MYO10|DENND2B|TUBA1C|PEAK1|TLN2|RSL1D1|BCAS3|PPP1R9B|CYFIP1|HSPA12A|CDC42|MTHFD1
Monarch Phenotype	Bone fracture related measurement	0.0037	3031	3.8e-05	0.24318	EFO:0004516	1289	61	EHD4|SNX8|RAB35|SNX17|ARF3|IPO5|COTL1|SLC12A2|PRKAR2A|PXN|CDH11|ANK3|FLCN|NRG1|ABI2|ITGB5|RAPGEF6|AXL|ABR|MMP14|ARHGAP1|FMN2|BASP1|MPDZ|EPB41L1|CTSB|DLG1|ATG7|FILIP1L|ITSN2|AP1B1|MYPN|MCMBP|PHLDB1|PTPN14|EPB41L2|ARHGAP18|PKN2|NIBAN2|NEK6|BICC1|PARD3|AHNAK|AKAP12|MAGI1|NFIC|FLNB|MYO10|DENND2B|TUBA1C|PEAK1|TLN2|RSL1D1|BCAS3|PPP1R9B|CDC42EP3|CYFIP1|COBLL1|HSPA12A|CDC42|MTHFD1
TISSUES	Bone marrow cancer cell	0.00014	3031	4.48e-06	0.385387	BTO:0000583	442	31	CDC37|NAMPT|PLCG1|CANX|TSG101|NECTIN2|CBL|CUL3|RAPGEF2|PXN|RASA1|USP15|ANK3|ANXA5|PKM|RASA3|PTK2|FYN|MPP1|SDC1|IL6ST|XRCC5|ABCC1|AGFG1|SHC1|SLC2A1|CDK5|ATP6V1C1|SLC1A5|PDCD5|ENO1
Monarch Phenotype	Bone measurement	0.0019	3031	1.53e-05	0.272125	EFO:0004512	2295	97	BAIAP2L1|TAB1|PYGB|EHD4|SNX8|YKT6|RAB35|SNX17|NECTIN2|NUMBL|HIP1R|RRAS2|ARF3|BCAR3|IPO5|COTL1|SLC12A2|FARP2|PDCD6|PRKAR2A|VPS37B|PXN|CDH11|SCYL1|CCT6A|ANK3|FLCN|NRG1|IGF2BP1|ABI2|ITGB5|RAPGEF6|AXL|ABR|MMP14|ARHGAP1|CSPG4|CPNE1|FMN2|BASP1|MPDZ|NPEPPS|DCBLD2|TUFM|COPG1|EPB41L1|CTSB|DLG1|ATG7|FILIP1L|ITSN2|AP1B1|MYPN|MCMBP|PHLDB1|TSC22D2|CALD1|PTPN14|VTA1|EPB41L2|ARHGAP18|PKN2|DNAJB4|DLG5|NIBAN2|NEK…
COMPARTMENTS	Bounding membrane of organelle	4.65e-09	3031	8.49e-11	0.833255	GOCC:0098588	1451	85	SNAP29|EHD4|SNX8|YKT6|SEC61B|RAB35|SNX17|SNAP23|TSG101|HIP1R|WDR44|LGALS3|PI4KA|ARF3|ITGAV|SNX1|RAB2A|MAP2K2|PACSIN2|EHD2|ARCN1|RAB10|PDCD6|RAB7A|SRI|VPS37B|SCYL1|ARL8A|EGFR|VPS51|FLCN|BAX|CYTH3|ARF6|SEC23A|RAB1B|ARHGAP1|CPNE1|VPS37A|RAP2B|LLGL1|COPG1|AP2A2|HGS|RAB12|RAB11B|ACSL4|SNX18|ANXA2|AP1B1|CASP8|AP2A1|CYB5R3|VTA1|MAP3K7|NRAS|RAP1A|OPTN|SNX2|DNM2|ARAP1|SEC31A|ITGB1|RAB1A|NECAP2|ATP2B1|CORO…
GO Cellular Component	Bounding membrane of organelle	2.58e-06	3031	1.04e-07	0.558838	GO:0098588	2125	100	SNAP29|TAB1|EHD4|SNX8|YKT6|SEC61B|RAB35|SNX17|ADGRE5|SNAP23|TSG101|HIP1R|WDR44|LGALS3|PI4KA|RRAS2|NOTCH2|ARF3|ITGAV|SNX1|RAB2A|MAP2K2|PACSIN2|EHD2|ARCN1|RAB10|PDCD6|RAB7A|SRI|VPS37B|IQGAP1|SCYL1|ARL8A|EGFR|FLCN|GNAQ|BAX|CYTH3|ARF6|SEC23A|RAB1B|ARHGAP1|CPNE1|VPS37A|RAP2B|LLGL1|NAPG|COPG1|AP2A2|HGS|RAB12|ATP11C|RAB11B|ACSL4|SNX18|ANXA2|AP1B1|CASP8|AP2A1|CYB5R3|VTA1|RAB13|MAP3K7|NRAS|RAP1A|GNAI3|AHN…
TISSUES	Brain	4.05e-44	3031	1.5e-46	4.33925	BTO:0000142	5733	320	ARF5|MRI1|EFNB1|SNAP29|TAB1|PYGB|TPD52L2|AHCY|PSMD10|CSK|TBC1D17|PSMA2|YKT6|ACTA2|RPL19|GALK1|SLC25A11|LRRC59|ARPC3|RAB35|EXOC2|SNX17|SLC1A4|PLCG1|VASP|TRAP1|CANX|PMPCB|NECTIN2|HIP1R|GRWD1|EXOC4|WDR44|LGALS3|PI4KA|NOTCH2|ARF3|PRPH|CCT7|TBRG4|PSMC1|IPO5|MPP5|TAOK1|PDGFRB|HACD3|COTL1|RAB2A|ACTR3|PACSIN2|EHD2|NAPA|EHBP1|ARCN1|FARP2|TUBB4A|CUL3|RAB10|PDCD6|RAB7A|PRKAR2A|SRI|PXN|CDH11|CDH2|SCYL1|PGD|A…
TISSUES	Brain cell line	0.0261	3031	0.0011	0.158336	BTO:0000255	188	14	EGFR|NONO|YWHAG|TUBB3|EZR|SRR|PARK7|PCBP2|FSCN1|CFL1|HSPH1|PHGDH|ENO1|CDC42
GO Biological Process	Brain development	8.29e-07	3031	9.62e-09	0.608145	GO:0007420	775	52	CSK|NUMBL|MPP5|AARS1|NAPA|ARCN1|RAPGEF2|NRP1|ACAT1|CDH2|EGFR|VPS51|NRG1|IGF2BP1|BAX|HPRT1|CRK|AXL|MAP2K1|BCR|CTNNA1|BASP1|ENO3|PLCB1|SRR|FYN|MINK1|SCRIB|ATP2B4|PLXNB2|KIF14|GNAI3|STXBP3|DLG5|GART|XRCC5|PLXNA1|FAT4|ITGB1|CTNND1|EPHB2|ATP2B1|RHOA|RAB3GAP1|SLC2A1|CDK5|SRGAP2C|PPP1R9B|PHGDH|CTNNB1|CDC42|ARHGAP35
WikiPathways	Brain-derived neurotrophic factor (BDNF) signaling pathway	1.04e-06	3031	1.46e-08	0.598297	WP2380	143	20	RANBP9|PLCG1|MAP2K2|CDH2|IGF2BP1|MAP2K1|DLG1|FYN|PTPRF|RAP1A|CHUK|EIF2S2|NFATC4|SHC1|CDK5|CFL1|SIRPA|CYFIP1|CTNNB1|CDC42
GO Biological Process	Branching morphogenesis of an epithelial tube	0.0052	3031	0.00016	0.2284	GO:0048754	134	13	NRP1|MMP14|MET|DLG1|EPHA2|DLG5|STK4|CLIC4|ILK|NFATC4|DAG1|YAP1|CTNNB1
TISSUES	Breast cancer cell	0.00017	3031	5.2e-06	0.376955	BTO:0000150	177	18	LRRC59|NOTCH2|TBRG4|PSMC1|NONO|USP15|NRG1|TUBB3|LASP1|TPM1|PTPN14|STK4|KIAA1522|RHOA|TXNRD1|TPM2|RPS27|ARHGAP35
Monarch Phenotype	Budd-Chiari syndrome	0.0499	3031	0.0011	0.13019	HP:0002639	14	4	MET|CASP8|LONP1|CTNNB1
Reactome Pathways	Budding and maturation of HIV virion	0.0131	3031	0.0017	0.188273	HSA-162588	28	5	TSG101|VPS37B|VPS37A|VTA1|UBAP1
GO Biological Process	Transmembrane receptor protein tyrosine kinase signaling pathway	1.05e-08	3031	8.25e-11	0.797881	GO:0007169	425	40	EFNB1|DOK1|PLCG1|BCAR3|PDGFRB|CBL|RAPGEF2|PDCD6|NRP1|PIK3C2A|IDE|PXN|IQGAP1|RASA1|EGFR|NRG1|MYO1E|STAT6|CRK|AXL|CSPG4|PAK2|MET|PLCB1|PTK2|FYN|EPHB4|EPHA2|MPZL1|ABI1|EPHB2|STON1|NFATC4|SHC1|ERBIN|C2CD5|SIPA1L1|YES1|CTNNB1|JAK1
InterPro Domains	C2 domain	0.0142	3031	9.55e-05	0.184771	IPR000008	145	14	PLCG1|SMURF2|PIK3C2A|RASA1|BCR|ABR|CPNE1|RASA3|PLCB1|ITSN2|PKN2|C2CD5|PLCB3|CAPN5
InterPro Domains	C2 domain superfamily	0.0082	3031	4.67e-05	0.208619	IPR035892	172	16	PLCG1|SMURF2|PIK3C2A|RASA1|DOCK11|BCR|ABR|CPNE1|RASA3|PLCB1|ITSN2|PKN2|C2CD5|PLCB3|DOCK10|CAPN5
GO Molecular Function	Cadherin binding	7.5e-38	3031	4.56e-41	3.71249	GO:0045296	334	75	BAIAP2L1|EHD4|YKT6|LRRC59|VASP|CDC42EP1|PI4KA|SNX1|PACSIN2|CBL|RAB10|CDH6|IQGAP1|CDH11|CDH2|SCYL1|EGFR|ANK3|CTNNA1|ARHGAP1|PAK2|NUDC|PKM|CTNNAL1|LASP1|RAB11B|EZR|PARK7|RPS2|DLG1|ANXA2|SCRIB|EPHA2|CALD1|AFDN|TAGLN2|ARHGAP18|SLK|CNN3|PKN2|PDLIM1|NIBAN2|MAPRE1|ABI1|AHNAK|SNX2|FSCN1|PKP4|SNX9|GIPC1|PICALM|RPL34|ITGB1|CTNND1|RAB1A|RPL6|PHLDB2|SEPTIN7|FLNB|CLINT1|CCS|TJP2|PLCB3|RAN|CNN2|RSL1D1|EHD1|SEP…
GO Molecular Function	Cadherin binding involved in cell-cell adhesion	0.0021	3031	3.14e-05	0.267778	GO:0098641	18	6	BAIAP2L1|CDC42EP1|RAB10|ANXA2|CNN3|PDLIM1
UniProt Keywords	Calcium	0.0136	3031	0.0011	0.186646	KW-0106	886	41	EHD4|ADGRE5|PLCG1|CANX|ITGAV|EHD2|CBL|PDCD6|CDH6|NRP1|SRI|CDH11|CDH2|ITGA5|ANXA5|ITGA2|MMP14|PCDHGC3|ITGA3|PLS1|PLCB1|ANXA2|ITSN2|PLS3|ATP2B4|MYLK|UTRN|NCS1|ANXA7|ANXA4|FAT4|ITGB1|TKT|ATP2B1|REPS1|ANXA11|C2CD5|PLCB3|ITGA7|PCDHGB5|EHD1
GO Molecular Function	Calcium ion binding	0.0152	3031	0.00029	0.181816	GO:0005509	717	37	EHD4|ADGRE5|PLCG1|CANX|NOTCH2|EHD2|CBL|TUBB4A|RAPGEF2|PDCD6|CDH6|SRI|IQGAP1|CDH11|CDH2|ANXA5|PCDHGC3|CPNE1|PLS1|PLCB1|SRR|ANXA2|ITSN2|PLS3|NCS1|ANXA7|ANXA4|FAT4|PPP3CB|TKT|REPS1|ANXA11|DAG1|C2CD5|PLCB3|PCDHGB5|EHD1
GO Molecular Function	Calcium-dependent phospholipid binding	0.0463	3031	0.0011	0.133442	GO:0005544	53	7	ANXA5|CPNE1|ANXA2|ANXA7|ANXA4|ANXA11|C2CD5
GO Molecular Function	Calcium-dependent protein binding	0.0329	3031	0.00072	0.14828	GO:0048306	82	9	TSG101|SLC9A1|PDCD6|VPS37B|ANXA2|ANXA7|ANXA4|SEC31A|ANXA11
UniProt Keywords	Calcium/phospholipid-binding	0.0018	3031	0.00011	0.274473	KW-0111	14	5	ANXA5|ANXA2|ANXA7|ANXA4|ANXA11
GO Molecular Function	Calmodulin binding	0.0057	3031	9.18e-05	0.224413	GO:0005516	203	17	CNN1|SLC9A1|IQGAP1|MYO1E|PLCB1|ATP2B4|MYLK|IQGAP3|CALD1|CNN3|PPP3CB|AKAP12|ATP2B1|MYO10|PLCB3|CNN2|CASK
UniProt Keywords	Calmodulin-binding	0.00099	3031	5.3e-05	0.300436	KW-0112	155	15	CNN1|SLC9A1|IQGAP1|MYO1E|ATP2B4|MYLK|IQGAP3|CALD1|CNN3|PPP3CB|AKAP12|ATP2B1|MYO10|CNN2|CASK
Pfam	Calponin family repeat	0.00065	3031	2.83e-07	0.318709	PF00402	6	6	CNN1|TAGLN2|CNN3|TAGLN|TAGLN3|CNN2
InterPro Domains	Calponin homology domain	8.65e-05	3031	1.93e-07	0.406298	IPR001715	80	14	CNN1|EHBP1|IQGAP1|PLS1|PLS3|IQGAP3|UTRN|TAGLN2|CNN3|MAPRE1|TAGLN|TAGLN3|FLNB|CNN2
SMART Domains	Calponin homology domain	2.79e-05	3031	1.36e-07	0.45544	SM00033	65	13	CNN1|EHBP1|IQGAP1|PLS1|PLS3|IQGAP3|UTRN|TAGLN2|CNN3|TAGLN|TAGLN3|FLNB|CNN2
InterPro Domains	Calponin repeat	0.00011	3031	2.83e-07	0.395861	IPR000557	6	6	CNN1|TAGLN2|CNN3|TAGLN|TAGLN3|CNN2
InterPro Domains	Calponin/LIMCH1	0.0433	3031	0.00036	0.136351	IPR001997	3	3	CNN1|CNN3|CNN2
KEGG Pathways	cAMP signaling pathway	0.0214	3031	0.0064	0.166959	hsa04024	207	13	RRAS2|MAP2K2|SLC9A1|MAP2K1|GNAI2|ATP2B4|AFDN|RAP1A|GNAI3|PPP1R12A|ATP2B1|RHOA|ATP1A1
GO Biological Process	Canonical glycolysis	0.0397	3031	0.0017	0.140121	GO:0061621	16	4	PFKL|PKM|ENO3|ENO1
Reactome Pathways	Cap-dependent Translation Initiation	9.92e-07	3031	2.35e-08	0.600349	HSA-72737	118	18	RPL19|RPS15A|EIF4A2|RPS2|RPLP1|RPS3A|EIF2S2|EIF1AX|RPL34|RPL6|RPL10|EIF2B1|RPS13|RPS4Y2|RPL9|RPS7|RPL11|RPS27
GO Molecular Function	Carbohydrate derivative binding	2.15e-21	3031	6.1e-24	2.06676	GO:0097367	2278	150	ARF5|RALA|PSMC4|YTHDC2|RP2|CSK|EHD4|RIPK2|AK1|ACTA2|GALK1|RAB35|DDX39A|TRAP1|PI4KA|RRAS2|ARF3|CCT7|PSMC1|MPP5|TAOK1|AARS1|PDGFRB|RAB2A|MAP2K2|ACTR3|EHD2|TUBB4A|RAPGEF2|RAB10|RAB7A|NRP1|PRKAR2A|ACAT1|PIK3C2A|IDE|PFKL|SCYL1|ARL8A|RALB|EGFR|CCT6A|CCT5|GNAQ|UBE2L6|MYO1E|ITGA2|ARF6|AXL|MAP2K1|BCR|DDX19A|RAB1B|ACAD9|GNAI2|PFAS|DNAJA2|PAK2|MET|TCP1|TUBB6|RAP2B|PKM|TUBB3|FARSA|TUFM|EIF4A2|BGN|RAB12|ATP11…
GO Biological Process	Carbohydrate derivative metabolic process	0.0414	3031	0.0018	0.1383	GO:1901135	998	44	AHCY|AK1|GALK1|PDGFRB|ACAT1|PFKL|PGD|RPIA|AKR1B1|ATP5MF|BAX|RPN1|HPRT1|PFAS|UGDH|PKM|ENO3|BGN|ACSL4|PARK7|DLG1|ATP5F1C|EPHA2|MPP1|GNAI3|DPM1|CMPK1|ACOT7|APRT|ITPA|GART|TKT|DDOST|RHOA|GMPS|TJP2|RAN|COASY|ADSL|MTAP|CASK|ENO1|MTHFD1|AMPD2
KEGG Pathways	Carbon metabolism	0.0214	3031	0.0064	0.166959	hsa01200	116	9	ACAT1|PFKL|PGD|RPIA|PKM|ENO3|TKT|PHGDH|ENO1
TISSUES	Carcinoma cell	5.86e-09	3031	1.43e-10	0.82321	BTO:0000176	616	49	PSMC4|PYGB|YKT6|LRRC59|ADGRE5|LGALS3|NOTCH2|CCT7|TBRG4|PSMC1|AARS1|NRP1|NONO|USP15|NRG1|BCR|CTNNA1|YWHAG|DNAJA2|MET|RPS15A|TUBB3|LASP1|TP53BP2|CTSB|ANXA2|TPM1|PTPN14|NIBAN1|RAB13|STK4|ANXA7|PARD3|ABI1|ITPA|ASMTL|EPHB2|KIAA1522|DDOST|RHOA|MYO10|TXNRD1|RAN|PPP1R18|RPL9|CTNNB1|TPM2|RPS27|ARHGAP35
Monarch Phenotype	Cardiovascular disease biomarker measurement	0.00078	3031	4.72e-06	0.310791	EFO:0005278	2228	97	BAIAP2L1|PYGB|CDC37|SNX8|SERPINE1|ACTA2|SNX17|SLC1A4|PLCG1|CANX|NECTIN2|HIP1R|EXOC4|NOTCH2|PDGFRB|RAB2A|EHBP1|FARP2|RAPGEF2|PXN|CDH11|SCYL1|NRG1|MYO1E|ABI2|ITGB5|RPN1|CYTH3|CRK|AXL|DIP2B|PFAS|MET|NUDC|NPEPPS|HNRNPM|PLS1|PTK2|FERMT2|DLG1|ATG7|FILIP1L|FYN|SRGAP1|ITSN2|MINK1|EPHB4|TPM1|COMT|TSC22D2|CALD1|CDC42BPA|EPB41L2|GNAI3|STXBP3|PKN2|NOC3L|NEK6|PHACTR4|BICC1|PALM2AKAP2|NAA40|EIF1AX|TRIM5|DNM2|S…
Monarch Phenotype	Cardiovascular measurement	0.0018	3031	1.34e-05	0.274473	EFO:0004298	2378	100	BAIAP2L1|PYGB|CDC37|SNX8|SERPINE1|ACTA2|SNX17|SLC1A4|PLCG1|CANX|NECTIN2|HIP1R|EXOC4|NOTCH2|PDGFRB|RAB2A|EHBP1|FARP2|RAPGEF2|PXN|CDH11|SCYL1|VPS51|NRG1|MYO1E|ABI2|ITGB5|RPN1|CYTH3|CRK|AXL|DIP2B|PFAS|MET|NUDC|NPEPPS|HNRNPM|PLS1|PTK2|FERMT2|DLG1|ATG7|FILIP1L|FYN|SRGAP1|ITSN2|MINK1|EPHB4|TPM1|MYPN|IQGAP3|COMT|TSC22D2|CALD1|CDC42BPA|EPB41L2|GNAI3|STXBP3|PKN2|NOC3L|NEK6|PHACTR4|BICC1|PALM2AKAP2|NAA40|E…
TISSUES	Cardiovascular system	6.05e-10	3031	1.35e-11	0.921824	BTO:0000088	1057	71	PYGB|RIPK2|SERPINE1|AK1|ACTA2|PLCG1|CNN1|RRAS2|CCT7|ITGAV|PSMD11|PDGFRB|SLC9A1|ACAT1|PGD|NONO|ITGA2|YWHAG|NUDC|PKM|DCBLD2|TUFM|ENO3|EIF4A2|BGN|ANXA2|RPLP1|RPS3A|PDLIM7|PLS3|ATP5F1C|ATP2B4|EPHB4|TPM1|MYLK|CALD1|PTPN14|UTRN|EPB41L2|NSDHL|CHUK|PDLIM1|CLIC4|ABI1|AHNAK|XRCC5|TAGLN|WDR6|ITGB1|AKAP12|SLC4A7|NFIC|RHOA|RPL6|PHLDB2|RPL10|SEPTIN7|PPP2R5D|FLNB|SERPINH1|TJP2|ITGA7|CNN2|ACTG1|CDC42EP3|SPATS2L|…
Reactome Pathways	Cargo recognition for clathrin-mediated endocytosis	4.41e-06	3031	1.43e-07	0.535556	HSA-8856825	105	16	DVL2|CBL|EGFR|COPS2|AP2A2|HGS|ITSN2|COPS5|AP2A1|PICALM|STON1|AGFG1|NECAP2|REPS1|FCHO2|EPN1
Reactome Pathways	Cargo trafficking to the periciliary membrane	0.007	3031	0.00077	0.21549	HSA-5620920	50	7	RP2|EXOC2|EXOC4|CCT5|TCP1|EXOC7|CCT4
GO Biological Process	Catabolic process	0.0229	3031	0.00088	0.164016	GO:0009056	1976	78	PSMC4|SNAP29|PYGB|AHCY|RIPK2|TBC1D17|PSMA2|SEC61B|GALK1|SNX17|PLCG1|CANX|TSG101|PSMC1|PSMD11|SMURF2|CBL|CUL3|RAB7A|ACAT1|IDE|VPS37B|PFKL|PGD|VPS51|USP15|QDPR|UBE2L6|NRG1|ERAP1|HPRT1|MMP14|RAB1B|VPS37A|PKM|NPEPPS|ENO3|HGS|RAB12|PLCB1|PARK7|CTSB|ATG7|FYN|PSMD12|CASP8|PCBP2|LONP1|COMT|KIF14|VTA1|ANXA7|PIP4K2A|ACOT7|OPTN|TRIM5|ITPA|ABCC1|ATG4B|BLVRA|RAB1A|GSPT1|TBC1D5|MPST|CUL2|NSFL1C|CDK5|PBK|PLCB3|…
GO Molecular Function	Catalytic activity	1.87e-06	3031	1.93e-08	0.572816	GO:0003824	5522	212	ARF5|RALA|MRI1|PSMC4|YTHDC2|TAB1|PYGB|AHCY|CSK|RIPK2|NAMPT|YKT6|AK1|GALK1|RAB35|DDX39A|PLCG1|TRAP1|PMPCB|PI4KA|RRAS2|ARF3|CCT7|PSMC1|TAOK1|AARS1|PDGFRB|HACD3|SMURF2|RAB2A|MAP2K2|EHD2|CBL|CUL3|RAB10|RAB7A|NRP1|PRKAR2A|ACAT1|PIK3C2A|IDE|PFKL|SCYL1|PGD|ARL8A|RALB|RASA1|EGFR|CCT6A|CCT5|USP15|QDPR|RPIA|SH3RF1|AKR1B1|GNAQ|UBE2L6|ZDHHC5|MYO1E|RPN1|ERAP1|INPPL1|ARF6|HPRT1|AXL|MAP2K1|BCR|ABR|DDX19A|MMP14|…
COMPARTMENTS	Catenin complex	0.0023	3031	9.88e-05	0.263827	GOCC:0016342	23	6	CDH6|CDH11|CDH2|CTNNA1|CTNND1|CTNNB1
GO Cellular Component	Catenin complex	0.0051	3031	0.0004	0.229243	GO:0016342	31	6	CDH6|CDH11|CDH2|CTNNA1|CTNND1|CTNNB1
STRING Clusters	Catenin complex	0.0134	3031	0.00024	0.18729	CL:21885	17	5	CDH6|CDH11|CDH2|CTNNA1|CTNNB1
STRING Clusters	Catenin complex	0.0257	3031	0.00054	0.159007	CL:21886	11	4	CDH11|CDH2|CTNNA1|CTNNB1
STRING Clusters	Catenin complex, and Plakophilin/Delta catenin	0.0021	3031	2.2e-05	0.267778	CL:21880	37	8	CDH6|CDH11|CDH2|CTNNA1|PKP4|FAT4|CTNND1|CTNNB1
STRING Clusters	Catenin complex, and Plakophilin/Delta catenin	0.0045	3031	5.7e-05	0.234679	CL:21881	31	7	CDH6|CDH11|CDH2|CTNNA1|PKP4|CTNND1|CTNNB1
GO Cellular Component	Caveola	0.0228	3031	0.0021	0.164207	GO:0005901	78	8	PACSIN2|EHD2|CBL|CTNNA1|ATP2B4|CORO1C|SLC2A1|CTNNB1
Reactome Pathways	CD28 dependent Vav1 pathway	0.0401	3031	0.0068	0.139686	HSA-389359	12	3	PAK2|FYN|CDC42
Reactome Pathways	Cdc20:Phospho-APC/C mediated degradation of Cyclin A	0.0326	3031	0.0051	0.148678	HSA-174184	72	7	PSMC4|PSMD10|PSMA2|PSMC1|PSMD11|PSMD12|PSME1
Reactome Pathways	CDC42 GTPase cycle	6.65e-09	3031	7.28e-11	0.817718	HSA-9013148	154	24	YKT6|CDC42EP1|SNAP23|RAB7A|IQGAP1|DOCK11|BCR|ABR|ARHGAP1|PAK2|DNMBP|FMNL3|SRGAP1|SCRIB|IQGAP3|CDC42BPA|FGD1|ARAP1|FNBP1|CDC42EP3|FARP1|DOCK10|CDC42|ARHGAP35
Reactome Pathways	CDK-mediated phosphorylation and removal of Cdc6	0.0326	3031	0.0051	0.148678	HSA-69017	72	7	PSMC4|PSMD10|PSMA2|PSMC1|PSMD11|PSMD12|PSME1
GO Biological Process	Cell adhesion	1.42e-13	3031	3.54e-16	1.28477	GO:0007155	965	77	BAIAP2L1|EFNB1|ADGRE5|CDC42EP1|NECTIN2|ITGAV|AJUBA|FARP2|RAB10|CDH6|NRP1|PXN|CDH11|CDH2|EGFR|NRG1|ITGA5|ITGB5|ITGA2|INPPL1|ARF6|AXL|BCR|CTNNA1|PCDHGC3|ITGA3|RAP2B|CTNNAL1|RIC8A|NEXN|EZR|FERMT2|DLG1|ANXA2|SCRIB|EPHB4|EPHA2|MYPN|KIRREL1|PLXNB2|PTPRF|MSN|AFDN|KIF14|TPBG|STXBP3|CNN3|PKN2|PDLIM1|DLG5|STXBP1|PARD3|PKP4|FAT4|ITGB1|ILK|CTNND1|STON1|MAGI1|RAB1A|RHOA|SHC1|CDK5|TENM3|ERBIN|PTPRK|TJP2|DAG1|I…
UniProt Keywords	Cell adhesion	0.0018	3031	0.00011	0.274473	KW-0130	478	29	ADGRE5|NECTIN2|ITGAV|AJUBA|CDH6|PXN|CDH11|CDH2|ITGA5|ITGB5|ITGA2|INPPL1|CTNNA1|PCDHGC3|ITGA3|FERMT2|EPHA2|PTPRF|AFDN|PKN2|PKP4|FAT4|ITGB1|CTNND1|TENM3|ITGA7|PIP5K1C|PCDHGB5|CTNNB1
GO Biological Process	Cell adhesion mediated by integrin	0.0092	3031	0.0003	0.203621	GO:0033627	42	7	ITGAV|ITGA5|ITGB5|ITGA2|ITGA3|ITGB1|ITGA7
GO Molecular Function	Cell adhesion mediator activity	0.00033	3031	4.61e-06	0.348149	GO:0098631	64	11	BAIAP2L1|CDC42EP1|RAB10|ITGA2|NEXN|ANXA2|MYPN|CNN3|PDLIM1|ITGB1|SIRPA
GO Molecular Function	Cell adhesion molecule binding	4.06e-40	3031	8.36e-44	3.93915	GO:0050839	560	96	BAIAP2L1|EHD4|YKT6|LRRC59|VASP|CDC42EP1|NECTIN2|PI4KA|ITGAV|SNX1|PACSIN2|CBL|RAB10|CDH6|IQGAP1|CDH11|CDH2|SCYL1|EGFR|ANK3|NRG1|ITGA5|ITGB5|ITGA2|CTNNA1|MMP14|ARHGAP1|PAK2|ITGA3|NUDC|PKM|CTNNAL1|LASP1|RAB11B|NEXN|EZR|PARK7|PTK2|RPS2|FERMT2|DLG1|ANXA2|SCRIB|EPHA2|MYPN|KIRREL1|PTPRF|MSN|CALD1|AFDN|UTRN|TAGLN2|ARHGAP18|SLK|CNN3|PKN2|PDLIM1|ANXA7|NIBAN2|MAPRE1|ABI1|AHNAK|SNX2|FSCN1|PKP4|SNX9|GIPC1|PIC…
GO Cellular Component	Cell body	1.01e-05	3031	4.67e-07	0.499568	GO:0044297	570	39	YKT6|ACTA2|SLC1A4|CANX|HIP1R|PRPH|CCT7|MPP5|SLC12A2|TUBB4A|RAPGEF2|CCT5|IGF2BP1|DIP2B|GNAI2|TCP1|NQO1|TUBB3|PPP2R1A|SRR|PARK7|DPYSL3|FYN|CASP8|PTPRF|HSPA1L|IL6ST|PICALM|CCT4|EPHB2|AKAP12|ATP2B1|GDI1|CDK5|MYO10|PPP1R9B|CYFIP1|EIF4A3|CDC42
GO Biological Process	Cell communication	1.31e-10	3031	6.79e-13	0.988273	GO:0007154	5165	219	RALA|DVL2|RANBP9|EFNB1|SNAP29|TAB1|CSK|RIPK2|NAMPT|LRRC59|RAB35|SNX17|DOK1|SLC1A4|ADGRE5|PLCG1|CDC42EP1|SNAP23|NUMBL|EXOC4|LGALS3|PI4KA|RRAS2|NOTCH2|BCAR3|ITGAV|TAOK1|PDGFRB|HACD3|SMURF2|SLC12A2|AJUBA|MAP2K2|NAPA|PPP1R12C|SLC9A1|CBL|FARP2|CUL3|RAPGEF2|PDCD6|CDH6|NRP1|PRKAR2A|SRI|PIK3C2A|IDE|PXN|IQGAP1|RALB|RASA1|EGFR|DOCK11|USP15|ANK3|FLCN|GNAQ|NRG1|MYO1E|BAX|ITGA5|ABI2|ITGB5|ANXA5|ITGA2|ERAP1|RA…
COMPARTMENTS	Cell cortex	2.87e-12	3031	3.99e-14	1.15421	GOCC:0005938	190	31	EXOC2|EXOC4|ANK3|ARF6|FMN2|LLGL1|LASP1|EXOC7|PLS1|EZR|SEPTIN6|PHLDB1|UTRN|EPB41L2|PARD3|MAPRE1|SEPTIN8|GIPC1|RHOA|PHLDB2|SEPTIN7|FNBP1|SLC2A1|FLNB|C2CD5|SEPTIN2|EPS8|CTNNB1|ENO1|RDX|CDC42
GO Cellular Component	Cell cortex	7.15e-19	3031	1.05e-20	1.81457	GO:0005938	304	48	EXOC2|HIP1R|EXOC4|COTL1|PXN|IQGAP1|MYO1E|ARF6|FMN2|LLGL1|LASP1|EXOC7|PLS1|EZR|MTSS2|PTK2|SEPTIN6|FERMT2|PHLDB1|CALD1|UTRN|EPB41L2|GLRX3|MPP1|PARD3|MAPRE1|SEPTIN8|FSCN1|SNX9|GIPC1|CTNND1|AKAP12|CORO1C|RHOA|PHLDB2|SEPTIN7|FNBP1|SLC2A1|FLNB|MYO10|DENND2B|C2CD5|PPP1R9B|SEPTIN2|EPS8|CTNNB1|ENO1|RDX
GO Biological Process	Cell cycle	2.98e-05	3031	4.92e-07	0.452578	GO:0007049	1246	66	RALA|YTHDC2|RAB35|EXOC2|TSG101|EXOC4|CCNB1|TAOK1|AJUBA|ACTR3|TUBB4A|CUL3|ARL8A|RALB|RASA1|ANK3|ARF6|GNAI2|TUBB6|FMN2|NUDC|TUBB3|LLGL1|PPP2R1A|EXOC7|PLCB1|EZR|TUBB4B|SEPTIN6|TP53BP2|SNX18|DLG1|ANKLE2|MCMBP|IQGAP3|KIF14|EPB41L2|GNAI3|PKN2|NEK6|PARD3|MAPRE1|SEPTIN8|DNM2|SNX9|ARAP1|WDR6|ITGB1|PPP1R12A|GSPT1|ANXA11|RHOA|SEPTIN7|CUL2|NSFL1C|CDK5|PBK|CFL1|TUBA1C|RAN|CCDC124|ARL8B|SEPTIN2|PHGDH|EPS8|CTNN…
Reactome Pathways	Cell Cycle	0.0364	3031	0.006	0.14389	HSA-1640170	658	30	PSMC4|PSMD10|PSMA2|CCNB1|PSMC1|PSMD11|TAOK1|RAB2A|AJUBA|TUBB4A|YWHAG|RAB1B|TUBB6|NUDC|TUBB3|PPP2R1A|TUBB4B|PSMD12|ANKLE2|NEK6|MAPRE1|OPTN|PSME1|RAB1A|PPP1R12A|POLR2H|PPP2R5D|TUBA1C|RAN|RPS27
UniProt Keywords	Cell cycle	0.0315	3031	0.0029	0.150169	KW-0131	651	31	RALA|TSG101|CCNB1|AJUBA|CUL3|ARL8A|RALB|ARF6|GNAI2|NUDC|SEPTIN6|TP53BP2|SNX18|ANKLE2|MCMBP|EPB41L2|GNAI3|PKN2|NEK6|PARD3|MAPRE1|SNX9|WDR6|ANXA11|RHOA|SEPTIN7|CDK5|RAN|CCDC124|ARL8B|SEPTIN2
GO Biological Process	Cell cycle process	0.00052	3031	1.17e-05	0.3284	GO:0022402	835	46	YTHDC2|RAB35|EXOC2|EXOC4|CCNB1|TAOK1|ACTR3|CUL3|RASA1|ANK3|FMN2|NUDC|LLGL1|PPP2R1A|EXOC7|PLCB1|EZR|SEPTIN6|SNX18|DLG1|ANKLE2|MCMBP|IQGAP3|KIF14|NEK6|MAPRE1|SEPTIN8|DNM2|SNX9|ARAP1|WDR6|ITGB1|PPP1R12A|GSPT1|ANXA11|RHOA|SEPTIN7|CUL2|NSFL1C|CDK5|CFL1|RAN|SEPTIN2|PHGDH|EPS8|CTNNB1
Reactome Pathways	Cell Cycle, Mitotic	0.0048	3031	0.00048	0.231876	HSA-69278	526	29	PSMC4|PSMD10|PSMA2|CCNB1|PSMC1|PSMD11|TAOK1|RAB2A|AJUBA|TUBB4A|YWHAG|RAB1B|TUBB6|NUDC|TUBB3|PPP2R1A|TUBB4B|PSMD12|ANKLE2|NEK6|MAPRE1|OPTN|PSME1|RAB1A|PPP1R12A|PPP2R5D|TUBA1C|RAN|RPS27
GO Biological Process	Cell development	6.44e-15	3031	1.23e-17	1.41911	GO:0048468	1719	113	YTHDC2|EFNB1|ACTA2|RAB35|VASP|NECTIN2|NUMBL|NOTCH2|ITGAV|MPP5|TAOK1|PDGFRB|FARP2|CUL3|RAPGEF2|RAB10|PDCD6|NRP1|PXN|IQGAP1|CDH11|CDH2|SCYL1|ANK3|AKR1B1|NRG1|MYO1E|IGF2BP1|BAX|ABI2|HPRT1|CRK|AXL|CTNNA1|PAK2|CPNE1|MET|FMN2|UGDH|TUBB3|LLGL1|PRMT3|NEXN|PLS1|EZR|PTK2|FERMT2|MAP4K4|DPYSL3|FRMD6|ANXA2|FYN|MINK1|SCRIB|EPHB4|TPM1|EPHA2|MYPN|PLXNB2|PTPRF|MSN|NCKAP1|AFDN|KIF14|RAB13|RAP1A|TPBG|STXBP1|NIBAN2|…
GO Biological Process	Cell differentiation	6.59e-12	3031	2.56e-14	1.11811	GO:0030154	3507	170	YTHDC2|EFNB1|CSK|RIPK2|AIMP2|ACTA2|RAB35|VASP|TSG101|NECTIN2|NUMBL|LGALS3|RRAS2|NOTCH2|ITGAV|MPP5|PSMD11|TAOK1|PDGFRB|NAPA|SLC9A1|FARP2|CUL3|RAPGEF2|RAB10|PDCD6|NRP1|PXN|IQGAP1|CDH11|CDH2|SCYL1|RASA1|EGFR|DOCK11|ANK3|SH3RF1|AKR1B1|NRG1|MYO1E|IGF2BP1|BAX|ITGA5|ABI2|ITGB5|ITGA2|ERAP1|ARF6|HPRT1|COPS2|STAT6|CRK|AXL|MAP2K1|BCR|CTNNA1|MMP14|CSPG4|PAK2|ITGA3|CPNE1|MET|FMN2|BASP1|UGDH|TUBB3|LLGL1|PRMT3|…
GO Biological Process	Cell division	3.68e-08	3031	3.21e-10	0.743415	GO:0051301	527	44	RALA|CDC37|RAB35|EXOC2|TSG101|NUMBL|EXOC4|CCNB1|ACTR3|CUL3|RAB10|ARL8A|RALB|RASA1|ANK3|ARF6|GNAI2|FMN2|NUDC|EXOC7|SEPTIN6|SNX18|ANKLE2|MCMBP|KIF14|EPB41L2|GNAI3|PKN2|NEK6|PARD3|MAPRE1|SEPTIN8|SNX9|ANXA11|RHOA|SEPTIN7|CDK5|CFL1|TUBA1C|RAN|CCDC124|ARL8B|SEPTIN2|CDC42
UniProt Keywords	Cell division	0.00013	3031	6.61e-06	0.388606	KW-0132	384	28	RALA|TSG101|CCNB1|CUL3|ARL8A|RALB|ARF6|GNAI2|NUDC|SEPTIN6|SNX18|ANKLE2|MCMBP|EPB41L2|GNAI3|PKN2|NEK6|PARD3|MAPRE1|SNX9|ANXA11|RHOA|SEPTIN7|CDK5|RAN|CCDC124|ARL8B|SEPTIN2
GO Cellular Component	Cell division site	0.00017	3031	9.87e-06	0.376955	GO:0032153	70	11	RALA|ARF6|SEPTIN6|MYLK|PKN2|SEPTIN8|ITGB1|RHOA|SEPTIN7|SEPTIN2|RDX
COMPARTMENTS	Cell junction	4.26e-45	3031	9.25e-48	4.43706	GOCC:0030054	1053	133	RALA|EFNB1|RPL19|ARPC3|ADGRE5|VASP|CDC42EP1|SNAP23|CNN1|NECTIN2|RRAS2|BCAR3|ITGAV|MPP5|PDGFRB|AJUBA|MAP2K2|ACTR3|PACSIN2|SLC9A1|RAPGEF2|RAB10|CDH6|NRP1|PXN|IQGAP1|CDH2|EGFR|ANK3|NRG1|MYO1E|ITGA5|ABI2|ITGB5|ANXA5|ITGA2|CYTH3|ARF6|MAP2K1|BCR|ABR|CTNNA1|YWHAG|MMP14|SRP68|CSPG4|ITGA3|DNMBP|RAP2B|BASP1|MPDZ|LASP1|RAB11B|NEXN|EZR|PTK2|TP53BP2|FERMT2|MAP4K4|DLG1|FYN|PDLIM7|SCRIB|COPS5|EPHA2|KIRREL1|MSN|…
GO Cellular Component	Cell junction	1.83e-57	3031	7.14e-60	5.67375	GO:0030054	2115	206	RALA|BAIAP2L1|PSMC4|EFNB1|SNAP29|CSK|NAMPT|MPP6|RPL19|ARPC3|RAB35|SLC1A4|ADGRE5|VASP|CANX|CDC42EP1|SNAP23|CNN1|NECTIN2|HIP1R|EXOC4|PI4KA|RRAS2|BCAR3|ITGAV|MPP5|PDGFRB|HACD3|AJUBA|MAP2K2|ACTR3|PACSIN2|NAPA|SLC9A1|CBL|RAPGEF2|RAB10|RAB7A|CDH6|NRP1|PRKAR2A|PXN|IQGAP1|CDH11|CDH2|ARL8A|EGFR|ANK3|GNAQ|ZDHHC5|NRG1|MYO1E|IGF2BP1|ITGA5|ABI2|ITGB5|ANXA5|ITGA2|CYTH3|ARF6|MAP2K1|BCR|ABR|CTNNA1|YWHAG|MMP14|SR…
UniProt Keywords	Cell junction	1.46e-16	3031	1.52e-18	1.58356	KW-0965	809	74	VASP|SNAP23|BCAR3|ITGAV|MPP5|AJUBA|RAPGEF2|PXN|CDH2|ARL8A|ANK3|MYO1E|IGF2BP1|ITGA5|ABI2|CYTH3|BCR|ABR|CTNNA1|ITGA3|DNMBP|MPDZ|RAB11B|NEXN|PTK2|FERMT2|DLG1|MINK1|SCRIB|COPS5|EPHA2|AFDN|UTRN|RAB13|RAP1A|PKN2|AMOT|DLG5|NCS1|NIBAN2|CLIC4|PARD3|ABI1|SEPTIN8|NHS|FSCN1|DNM2|PKP4|WASF1|ITGB1|ILK|CTNND1|MAGI1|AMOTL1|ATP2B1|CORO1C|MPST|GPHN|CDK5|ERBIN|PTPRK|TJP2|DAG1|SIPA1L1|PEAK1|TLN2|PIP5K1C|PPP1R9B|ARL8…
GO Biological Process	Cell junction assembly	6.33e-12	3031	2.42e-14	1.11986	GO:0034329	273	37	AJUBA|CDH6|CDH11|CDH2|FLCN|NRG1|ITGA5|ABI2|ITGA2|BCR|CTNNA1|PAK2|FERMT2|DLG1|PLXNB2|AFDN|RAB13|PKN2|AMOT|DLG5|PARD3|FSCN1|PKP4|CTNND1|EPHB2|STON1|RHOA|CDK5|PTPRK|PEAK1|TLN2|ACTG1|PIP5K1C|SRGAP2C|FARP1|CTNNB1|CDC42
GO Biological Process	Cell junction organization	1.09e-14	3031	2.23e-17	1.39626	GO:0034330	492	55	CSK|NUMBL|AJUBA|CDH6|NRP1|CDH11|CDH2|ANK3|FLCN|NRG1|ITGA5|ABI2|ITGA2|ARF6|BCR|CTNNA1|PCDHGC3|PAK2|ITGA3|PRMT3|FERMT2|DLG1|FYN|KIRREL1|PLXNB2|PTPRF|AFDN|RAB13|PKN2|AMOT|DLG5|PARD3|FSCN1|PKP4|WASF1|CTNND1|EPHB2|STON1|NFATC4|RHOA|GPHN|CDK5|PTPRK|TJP2|PEAK1|TLN2|ACTG1|PIP5K1C|SRGAP2C|CYFIP1|WASF2|FARP1|DOCK10|CTNNB1|CDC42
Reactome Pathways	Cell junction organization	1.14e-06	3031	2.8e-08	0.59431	HSA-446728	92	16	VASP|NECTIN2|MPP5|CDH6|PXN|CDH11|CDH2|CTNNA1|FERMT2|AFDN|PARD3|ITGB1|ILK|CTNND1|ACTG1|CTNNB1
COMPARTMENTS	Cell leading edge	2.54e-22	3031	1.21e-24	2.15952	GOCC:0031252	251	49	ARPC3|PLCG1|VASP|HIP1R|ITGAV|ACTR3|SLC9A1|PXN|IQGAP1|CDH2|EGFR|SH3RF1|ITGA5|ABI2|ARF6|TUBB3|EZR|MTSS2|DPYSL3|TPM1|EPHA2|MYLK|NCKAP1|CDC42BPA|ARHGAP18|RAB13|SLK|PKN2|AMOT|PHACTR4|FGD1|ABI1|NHS|FSCN1|SNX9|WASF1|ITGB1|CORO1C|RHOA|PHLDB2|CFL1|PTPRK|DAG1|C2CD5|PPP1R9B|CYFIP1|WASF2|EPS8|RDX
GO Cellular Component	Cell leading edge	7.88e-33	3031	5.01e-35	3.21035	GO:0031252	422	75	ACTA2|ARPC3|PLCG1|VASP|HIP1R|ITGAV|SNX1|AJUBA|ACTR3|PACSIN2|SLC9A1|PXN|IQGAP1|CDH2|RASA1|EGFR|SH3RF1|IGF2BP1|ITGA5|ABI2|CYTH3|INPPL1|ARF6|CTNNA1|CSPG4|TUBB3|EZR|MTSS2|FERMT2|DPYSL3|PDLIM7|SCRIB|TPM1|EPHA2|MYLK|NCKAP1|CDC42BPA|ARHGAP18|RAB13|SLK|PKN2|AMOT|PHACTR4|FGD1|ABI1|SNX2|NHS|FSCN1|DNM2|SNX9|WASF1|ITGB1|ILK|CTNND1|STON1|ATP2B1|CORO1C|RHOA|PHLDB2|CDK5|MYO10|CFL1|PTPRK|DAG1|C2CD5|TLN2|PIP5K1C|…
UniProt Keywords	Cell membrane	3.03e-09	3031	6.31e-11	0.851856	KW-1003	3277	151	RALA|DVL2|RANBP9|EFNB1|SNAP29|RP2|CSK|EHD4|CD82|RAB35|ADGRE5|VASP|SNAP23|NECTIN2|EFR3A|PI4KA|RRAS2|NOTCH2|ITGAV|MPP5|ANKRD13A|PDGFRB|SMURF2|AJUBA|PACSIN2|EHD2|NAPA|SLC9A1|CBL|RAPGEF2|CDH6|NRP1|PRKAR2A|PIK3C2A|IDE|IQGAP1|CDH11|CDH2|RALB|EGFR|ANK3|ZDHHC5|NRG1|RAPGEF6|CYTH3|ARF6|CRK|AXL|CTNNA1|PCDHGC3|CSPG4|GNAI2|ITGA3|CPNE1|FMN2|BASP1|MPDZ|CTNNAL1|PPP2R1A|RIC8A|AP2A2|ATP11C|EXOC7|RASA3|FMNL3|EZR|AC…
GO Biological Process	Cell migration	6.95e-16	3031	1.02e-18	1.5158	GO:0016477	903	79	EFNB1|PLCG1|LGALS3|RRAS2|ITGAV|PDGFRB|SLC12A2|AJUBA|SLC9A1|CUL3|RAPGEF2|NRP1|PIK3C2A|PXN|IQGAP1|CDH2|EGFR|SH3RF1|NRG1|BAX|ITGA5|ABI2|ITGB5|ITGA2|CRK|AXL|BCR|CTNNA1|MMP14|CSPG4|ITGA3|MET|RIC8A|FMNL3|PTK2|FYN|SCRIB|EPHB4|EPHA2|PTPRF|MSN|NCKAP1|CDC42BPA|RAB13|TPBG|PKN2|PDLIM1|AMOT|PHACTR4|MAPRE1|SDC1|FSCN1|GIPC1|PLXNA1|ITGB1|ILK|ABCC1|EPHB2|STON1|RAB1A|AMOTL1|CORO1C|RHOA|CDK5|AMOTL2|PTPRK|ITGA7|PEAK…
GO Biological Process	Cell morphogenesis	1.36e-18	3031	1.39e-21	1.78665	GO:0000902	708	74	EFNB1|VASP|NUMBL|NOTCH2|ITGAV|TAOK1|SNX1|PACSIN2|CUL3|RAB10|CDH6|NRP1|PXN|IQGAP1|CDH11|EGFR|ANK3|NRG1|IGF2BP1|ABI2|HPRT1|AXL|CPNE1|MET|TUBB3|LLGL1|PRMT3|NEXN|PLS1|PTK2|FERMT2|MAP4K4|FRMD6|FYN|MINK1|SCRIB|EPHB4|EPHA2|MYPN|PLXNB2|NCKAP1|KIF14|TPBG|STK4|STXBP1|NIBAN2|CLIC4|PARD3|ABI1|SNX2|DNM2|WASF1|PICALM|PLXNA1|PPP3CB|ITGB1|ILK|EPHB2|TPRN|RAB1A|NFATC4|RHOA|CDK5|FLNB|DAG1|PEAK1|YAP1|CYFIP1|WASF2|FA…
GO Biological Process	Cell morphogenesis involved in differentiation	2.03e-14	3031	4.39e-17	1.36925	GO:0000904	554	58	EFNB1|VASP|NUMBL|NOTCH2|ITGAV|CUL3|RAB10|NRP1|PXN|CDH11|ANK3|IGF2BP1|ABI2|HPRT1|AXL|MET|TUBB3|LLGL1|PRMT3|NEXN|PLS1|PTK2|FERMT2|FRMD6|FYN|MINK1|SCRIB|EPHB4|EPHA2|MYPN|PLXNB2|KIF14|TPBG|STXBP1|NIBAN2|CLIC4|PARD3|ABI1|PICALM|PLXNA1|PPP3CB|ITGB1|ILK|EPHB2|TPRN|RAB1A|NFATC4|RHOA|CDK5|FLNB|DAG1|PEAK1|CYFIP1|FARP1|DOCK10|CTNNB1|CDC42|ARHGAP35
GO Biological Process	Cell morphogenesis involved in neuron differentiation	2.24e-09	3031	1.58e-11	0.864975	GO:0048667	438	42	EFNB1|VASP|NUMBL|NOTCH2|RAB10|NRP1|CDH11|ANK3|IGF2BP1|HPRT1|TUBB3|LLGL1|PRMT3|NEXN|PLS1|PTK2|FYN|MINK1|SCRIB|EPHB4|EPHA2|MYPN|PLXNB2|TPBG|STXBP1|NIBAN2|PARD3|ABI1|PICALM|PLXNA1|PPP3CB|ITGB1|EPHB2|TPRN|NFATC4|CDK5|DAG1|CYFIP1|FARP1|DOCK10|CDC42|ARHGAP35
GO Biological Process	Cell motility	2.76e-14	3031	6.16e-17	1.35591	GO:0048870	1061	83	EFNB1|ARPC3|PLCG1|LGALS3|RRAS2|ITGAV|PDGFRB|SLC12A2|AJUBA|ACTR3|SLC9A1|CUL3|RAPGEF2|NRP1|PIK3C2A|PXN|IQGAP1|CDH2|EGFR|SH3RF1|NRG1|BAX|ITGA5|ABI2|ITGB5|ITGA2|CRK|AXL|MAP2K1|BCR|CTNNA1|MMP14|CSPG4|ITGA3|MET|RIC8A|FMNL3|PTK2|FYN|SCRIB|ATP2B4|EPHB4|EPHA2|PTPRF|MSN|NCKAP1|CDC42BPA|RAB13|TPBG|PKN2|PDLIM1|AMOT|PHACTR4|MAPRE1|SDC1|FSCN1|GIPC1|PLXNA1|ITGB1|ILK|ABCC1|EPHB2|STON1|RAB1A|AMOTL1|CORO1C|RHOA|CD…
GO Biological Process	Cell part morphogenesis	1.13e-13	3031	2.73e-16	1.29469	GO:0032990	506	54	EFNB1|VASP|NECTIN2|NUMBL|NOTCH2|TAOK1|SNX1|PACSIN2|RAB10|NRP1|IQGAP1|CDH11|ANK3|IGF2BP1|BAX|HPRT1|CPNE1|TUBB3|LLGL1|PRMT3|NEXN|PTK2|MAP4K4|FYN|MINK1|EPHB4|EPHA2|MYPN|PLXNB2|NCKAP1|TPBG|STXBP1|NIBAN2|PARD3|ABI1|SNX2|DNM2|WASF1|PICALM|PLXNA1|PPP3CB|ITGB1|EPHB2|NFATC4|RHOA|CDK5|DAG1|CYFIP1|WASF2|FARP1|DOCK10|CTNNB1|CDC42|ARHGAP35
COMPARTMENTS	Cell periphery	4.43e-15	3031	5.78e-17	1.43536	GOCC:0071944	3860	190	RALA|BAIAP2L1|EFNB1|SNAP29|RP2|SERPINE1|CD82|RAB35|EXOC2|SLC1A4|ADGRE5|PLCG1|VASP|SNAP23|TSG101|NECTIN2|HIP1R|EXOC4|LGALS3|EFR3A|PI4KA|NOTCH2|ITGAV|ANKRD13A|PDGFRB|SLC12A2|AJUBA|MAP2K2|PACSIN2|EHD2|SLC9A1|CBL|CUL3|RAPGEF2|CDH6|NRP1|PRKAR2A|SRI|PIK3C2A|IDE|VPS37B|PXN|IQGAP1|CDH11|CDH2|RALB|EGFR|ANK3|GNAQ|ZDHHC5|NRG1|ITGA5|ITGB5|ANXA5|ITGA2|RAPGEF6|CYTH3|ARF6|STAT6|AXL|MAP2K1|CTNNA1|MMP14|CSPG4|GNA…
GO Cellular Component	Cell periphery	2.14e-22	3031	2.72e-24	2.16696	GO:0071944	6015	280	ARF5|RALA|BAIAP2L1|DVL2|RANBP9|EFNB1|SNAP29|RP2|CSK|EHD4|MPP6|SERPINE1|YKT6|SLC25A11|CD82|RAB35|EXOC2|SLC1A4|ADGRE5|PLCG1|VASP|TRAP1|CANX|CDC42EP1|SNAP23|TSG101|NECTIN2|HIP1R|EXOC4|LGALS3|EFR3A|PI4KA|RRAS2|NOTCH2|ARF3|PRPH|ITGAV|MPP5|ANKRD13A|PDGFRB|COTL1|SMURF2|SLC12A2|AJUBA|MAP2K2|PACSIN2|EHD2|NAPA|SLC9A1|EHBP1|CBL|CUL3|RAPGEF2|RAB10|RAB7A|CDH6|NRP1|PRKAR2A|SRI|PIK3C2A|IDE|VPS37B|PXN|IQGAP1|CDH…
GO Biological Process	Cell population proliferation	0.0023	3031	6.18e-05	0.263827	GO:0008283	712	39	DVL2|EFNB1|RIPK2|NUMBL|NOTCH2|PDGFRB|MAP2K2|RAB10|EGFR|FLCN|NRG1|IGF2BP1|BAX|ITGA2|HPRT1|COPS2|STAT6|CRK|MAP2K1|CTNNA1|MMP14|GNAI2|DLG1|FYN|SCRIB|EPHA2|PLXNB2|MSN|IQGAP3|KIF14|STK4|EIF2S2|XRCC5|PPP3CB|ITGB1|ILK|TXNRD1|YAP1|CTNNB1
COMPARTMENTS	Cell projection	1.22e-17	3031	1.06e-19	1.69136	GOCC:0042995	1310	100	SNAP29|RP2|AK1|ARPC3|RAB35|PLCG1|VASP|HIP1R|EXOC4|ITGAV|SLC12A2|ACTR3|SLC9A1|CBL|TUBB4A|CUL3|RAPGEF2|RAB10|PRKAR2A|PXN|IQGAP1|CDH2|EGFR|ANK3|SH3RF1|FLCN|IGF2BP1|ITGA5|ABI2|ARF6|DIP2B|ACAD9|ITGA3|BASP1|MPDZ|TUBB3|PPP2R1A|EXOC7|PLS1|EZR|MTSS2|PTK2|SEPTIN6|DPYSL3|ATG7|FYN|ATP2B4|TPM1|EPHA2|MSN|MYLK|NCKAP1|CDC42BPA|UTRN|ARHGAP18|RAB13|RAP1A|PKN2|AMOT|DLG5|PHACTR4|CLIC4|PARD3|FGD1|ABI1|NHS|FSCN1|GARS1…
GO Cellular Component	Cell projection	1.65e-29	3031	1.45e-31	2.87825	GO:0042995	2379	170	MRI1|SNAP29|AHCY|RP2|YKT6|AK1|ACTA2|ARPC3|RAB35|SLC1A4|PLCG1|VASP|CANX|SNAP23|HIP1R|EXOC4|NOTCH2|PRPH|ITGAV|MPP5|SNX1|SLC12A2|AJUBA|ACTR3|PACSIN2|SLC9A1|CBL|TUBB4A|CUL3|RAPGEF2|RAB10|NRP1|PRKAR2A|PXN|IQGAP1|CDH2|ARL8A|RASA1|EGFR|ANK3|SH3RF1|FLCN|GNAQ|ZDHHC5|NRG1|MYO1E|IGF2BP1|ITGA5|ABI2|ITGA2|CYTH3|INPPL1|ARF6|DIP2B|BCR|ABR|CTNNA1|CSPG4|ACAD9|GNAI2|ITGA3|FMN2|BASP1|NQO1|MPDZ|PKM|TUBB3|LLGL1|PPP2R…
UniProt Keywords	Cell projection	2.89e-17	3031	2.58e-19	1.65391	KW-0966	1024	86	MRI1|SNAP29|RP2|ARPC3|PLCG1|VASP|EXOC4|MPP5|SNX1|ACTR3|PACSIN2|CBL|CUL3|RAB10|ARL8A|ANK3|SH3RF1|IGF2BP1|ABI2|INPPL1|ARF6|BCR|ABR|CSPG4|ITGA3|BASP1|MPDZ|TUBB3|LLGL1|PPP2R1A|EZR|MTSS2|SEPTIN6|FERMT2|DPYSL3|MINK1|SCRIB|ATP2B4|EPHA2|MSN|MYLK|NCKAP1|CDC42BPA|RAB13|MPP1|PKN2|DLG5|PHACTR4|FGD1|ABI1|SEPTIN8|SNX2|NHS|FSCN1|DNM2|GARS1|SNX9|CCT4|ITGB1|ILK|EPHB2|TPRN|SLC4A7|CORO1C|RHOA|SEPTIN7|GPHN|CDK5|MYO1…
GO Biological Process	Cell projection assembly	0.00013	3031	2.65e-06	0.388606	GO:0030031	430	31	SNAP29|RP2|EHD4|AJUBA|ACTR3|EHD2|RAPGEF2|NRP1|RAPGEF6|DNAAF5|INPPL1|ARF6|CSPG4|EZR|MTSS2|SEPTIN6|MYLK|NCKAP1|FGD1|MAPRE1|FSCN1|ITGB1|STON1|SEPTIN7|SRGAP2C|PPP1R9B|EHD1|SEPTIN2|CYFIP1|WASF2|CDC42
COMPARTMENTS	Cell projection membrane	3.15e-07	3031	6.85e-09	0.650169	GOCC:0031253	198	24	SNAP29|RAB35|PLCG1|VASP|HIP1R|ITGAV|SLC12A2|EGFR|ARF6|ITGA3|EZR|MTSS2|TPM1|NCKAP1|UTRN|FSCN1|ITGB1|MYO10|CFL1|C2CD5|PPP1R9B|EHD1|SEPTIN2|EPS8
GO Cellular Component	Cell projection membrane	1.24e-10	3031	2.85e-12	0.990658	GO:0031253	342	38	SNAP29|RAB35|PLCG1|VASP|HIP1R|ITGAV|SLC12A2|PACSIN2|EGFR|ARF6|CSPG4|ITGA3|EZR|MTSS2|FERMT2|DLG1|TPM1|EPHA2|MSN|NCKAP1|UTRN|MAPRE1|FSCN1|DNM2|ITGB1|ATP2B1|CORO1C|RHOA|MYO10|CFL1|C2CD5|PIP5K1C|PPP1R9B|EHD1|SEPTIN2|EPS8|CASK|CTNNB1
GO Biological Process	Cell projection morphogenesis	3.53e-13	3031	9.9e-16	1.24522	GO:0048858	487	52	EFNB1|VASP|NUMBL|NOTCH2|TAOK1|SNX1|PACSIN2|RAB10|NRP1|IQGAP1|CDH11|ANK3|IGF2BP1|HPRT1|CPNE1|TUBB3|LLGL1|PRMT3|NEXN|PTK2|MAP4K4|FYN|MINK1|EPHB4|EPHA2|MYPN|PLXNB2|NCKAP1|TPBG|STXBP1|NIBAN2|PARD3|ABI1|SNX2|DNM2|WASF1|PICALM|PLXNA1|PPP3CB|ITGB1|EPHB2|NFATC4|RHOA|CDK5|DAG1|CYFIP1|WASF2|FARP1|DOCK10|CTNNB1|CDC42|ARHGAP35
GO Biological Process	Cell projection organization	9.44e-17	3031	1.14e-19	1.6025	GO:0030030	1158	93	EFNB1|SNAP29|RP2|EHD4|RAB35|VASP|NECTIN2|NUMBL|NOTCH2|TAOK1|SNX1|AJUBA|ACTR3|PACSIN2|EHD2|CUL3|RAPGEF2|RAB10|NRP1|IQGAP1|CDH11|ANK3|IGF2BP1|RAPGEF6|DNAAF5|INPPL1|ARF6|HPRT1|CRK|CTNNA1|CSPG4|PAK2|ITGA3|CPNE1|TUBB3|LLGL1|PRMT3|NEXN|PLS1|EZR|MTSS2|PTK2|SEPTIN6|MAP4K4|FYN|MINK1|SCRIB|EPHB4|TPM1|EPHA2|MYPN|PLXNB2|PTPRF|MYLK|NCKAP1|RAB13|TPBG|PKN2|STXBP1|NIBAN2|PARD3|FGD1|MAPRE1|ABI1|SNX2|FSCN1|DNM2|WA…
GO Biological Process	Cell recognition	0.0115	3031	0.00039	0.19393	GO:0008037	148	13	CCT7|NRP1|PRKAR2A|CCT5|TCP1|NEXN|DLG1|MYPN|MSN|HSPA1L|CCT4|EPHB2|ARHGAP35
UniProt Keywords	Cell shape	0.0115	3031	0.00093	0.19393	KW-0133	24	5	EZR|FERMT2|ITGA7|CDC42EP3|CYFIP1
COMPARTMENTS	Cell surface	4.74e-05	3031	1.4e-06	0.432422	GOCC:0009986	438	32	RALA|NECTIN2|NOTCH2|ITGAV|IDE|CDH2|EGFR|ITGA5|ITGB5|ITGA2|AXL|CSPG4|ITGA3|MET|DCBLD2|BGN|ANXA2|EPHA2|PLXNB2|MSN|TPBG|AMOT|CLIC4|SDC1|PICALM|ANXA4|ITGB1|PTPRK|ITGA7|SIRPA|ENO1|CAPN5
GO Cellular Component	Cell surface	0.003	3031	0.00021	0.252288	GO:0009986	894	44	RALA|SLC1A4|NECTIN2|LGALS3|NOTCH2|ITGAV|PDGFRB|SLC9A1|IDE|CDH2|EGFR|ANK3|ITGA5|ITGB5|ANXA5|ITGA2|AXL|CSPG4|ITGA3|MET|DCBLD2|BGN|FERMT2|CTSB|ANXA2|EPHA2|PLXNB2|MPZL1|MSN|TPBG|AMOT|CLIC4|SDC1|IL6ST|PICALM|ANXA4|ITGB1|EPHB2|PTPRK|DAG1|ITGA7|SIRPA|ENO1|CAPN5
Reactome Pathways	Cell surface interactions at the vascular wall	0.0169	3031	0.0023	0.177211	HSA-202733	139	11	PLCG1|ITGAV|ITGA5|ITGA3|FYN|NRAS|SDC1|ITGB1|SHC1|YES1|SIRPA
Reactome Pathways	Diseases of signal transduction by growth factor receptors and second messengers	3.81e-06	3031	1.18e-07	0.541908	HSA-5663202	430	34	PSMC4|PSMD10|CSK|CDC37|PSMA2|PLCG1|PSMC1|PSMD11|PDGFRB|MAP2K2|CBL|IQGAP1|EGFR|NRG1|MAP2K1|BCR|MET|PPP2R1A|ATG7|FYN|PSMD12|MSN|NRAS|RAP1A|CHUK|PSME1|SEC31A|SHC1|POLR2H|PPP2R5D|ERBIN|ACTG1|YES1|CTNNB1
GO Biological Process	Cell-cell adhesion	1.24e-10	3031	6.32e-13	0.990658	GO:0098609	542	50	BAIAP2L1|CDC42EP1|NECTIN2|ITGAV|AJUBA|RAB10|CDH6|CDH11|CDH2|EGFR|NRG1|ITGA5|ITGB5|ITGA2|CTNNA1|PCDHGC3|ITGA3|RAP2B|RIC8A|NEXN|EZR|DLG1|ANXA2|SCRIB|MYPN|KIRREL1|PLXNB2|PTPRF|MSN|AFDN|STXBP3|CNN3|PDLIM1|DLG5|STXBP1|PKP4|FAT4|ITGB1|ILK|CTNND1|SHC1|TENM3|TJP2|ITGA7|TLN2|ACTG1|PIP5K1C|PCDHGB5|SIRPA|CTNNB1
GO Molecular Function	Cell-cell adhesion mediator activity	0.0028	3031	4.21e-05	0.255284	GO:0098632	54	9	BAIAP2L1|CDC42EP1|RAB10|NEXN|ANXA2|MYPN|CNN3|PDLIM1|SIRPA
GO Biological Process	Cell-cell adhesion via plasma-membrane adhesion molecules	0.0394	3031	0.0017	0.14045	GO:0098742	267	17	NECTIN2|AJUBA|CDH6|CDH11|CDH2|NRG1|ITGA5|PCDHGC3|RIC8A|NEXN|MYPN|PLXNB2|PTPRF|FAT4|ITGB1|TENM3|PCDHGB5
Reactome Pathways	Cell-Cell communication	8.3e-09	3031	9.81e-11	0.808092	HSA-1500931	129	22	VASP|NECTIN2|MPP5|CDH6|PXN|IQGAP1|CDH11|CDH2|CTNNA1|PTK2|FERMT2|FYN|KIRREL1|AFDN|PARD3|ITGB1|ILK|CTNND1|ACTG1|SIRPA|CASK|CTNNB1
COMPARTMENTS	Cell-cell contact zone	0.002	3031	8.62e-05	0.269897	GOCC:0044291	46	8	CDH2|ANK3|RAP2B|DLG1|AFDN|AHNAK|TJP2|CTNNB1
GO Cellular Component	Cell-cell contact zone	1.43e-06	3031	5.24e-08	0.584466	GO:0044291	71	14	NECTIN2|SLC9A1|CDH2|ANK3|CTNNA1|RAP2B|DLG1|SCRIB|AFDN|AHNAK|ITGB1|SLC2A1|TJP2|CTNNB1
COMPARTMENTS	Cell-cell junction	9e-17	3031	9.39e-19	1.60458	GOCC:0005911	299	45	SNAP23|NECTIN2|MPP5|AJUBA|MAP2K2|RAPGEF2|IQGAP1|CDH2|ANK3|MYO1E|ABI2|CYTH3|CTNNA1|DNMBP|RAP2B|MPDZ|FERMT2|DLG1|PDLIM7|SCRIB|EPHA2|KIRREL1|CDC42BPA|AFDN|RAB13|PKN2|AMOT|NIBAN2|CLIC4|PARD3|AHNAK|NHS|FSCN1|PKP4|CTNND1|MAGI1|AMOTL1|RHOA|PTPRK|TJP2|CNN2|ACTG1|EPS8|CASK|CTNNB1
GO Cellular Component	Cell-cell junction	6.43e-31	3031	5.03e-33	3.01918	GO:0005911	499	78	BAIAP2L1|CSK|MPP6|VASP|CDC42EP1|SNAP23|NECTIN2|MPP5|AJUBA|MAP2K2|ACTR3|PACSIN2|SLC9A1|RAPGEF2|RAB10|CDH6|PXN|IQGAP1|CDH11|CDH2|ANK3|MYO1E|ABI2|CYTH3|CTNNA1|PAK2|DNMBP|RAP2B|MPDZ|LLGL1|NEXN|EZR|PARK7|FERMT2|FRMD6|DLG1|ANXA2|PDLIM7|SCRIB|EPHA2|KIRREL1|MSN|IQGAP3|CDC42BPA|AFDN|RAB13|MPP1|CNN3|PKN2|PDLIM1|AMOT|DLG5|NIBAN2|CLIC4|PARD3|AHNAK|NHS|FSCN1|PKP4|ITGB1|CTNND1|MAGI1|AMOTL1|RHOA|SLC2A1|AMOTL2|P…
GO Biological Process	Cell-cell junction assembly	1.24e-09	3031	8.18e-12	0.890658	GO:0007043	124	23	CDH6|CDH11|CDH2|FLCN|ABI2|CTNNA1|PAK2|DLG1|AFDN|RAB13|PKN2|AMOT|DLG5|PARD3|FSCN1|PKP4|CTNND1|EPHB2|RHOA|TLN2|ACTG1|PIP5K1C|CTNNB1
GO Biological Process	Cell-cell junction organization	3.63e-11	3031	1.67e-13	1.04401	GO:0045216	174	29	CSK|NUMBL|CDH6|CDH11|CDH2|FLCN|ABI2|CTNNA1|PAK2|FERMT2|DLG1|KIRREL1|AFDN|RAB13|PKN2|AMOT|DLG5|PARD3|FSCN1|PKP4|CTNND1|EPHB2|RHOA|TJP2|TLN2|ACTG1|PIP5K1C|CTNNB1|CDC42
Reactome Pathways	Cell-cell junction organization	0.00011	3031	5.26e-06	0.395861	HSA-421270	65	11	NECTIN2|MPP5|CDH6|CDH11|CDH2|CTNNA1|AFDN|PARD3|CTNND1|ACTG1|CTNNB1
GO Biological Process	Cell-cell recognition	0.0207	3031	0.00078	0.168403	GO:0009988	66	8	CCT7|PRKAR2A|CCT5|TCP1|DLG1|MSN|HSPA1L|CCT4
GO Biological Process	Cell-cell signaling	0.0152	3031	0.00055	0.181816	GO:0007267	1079	49	DVL2|EFNB1|SNAP29|NAMPT|SLC1A4|ADGRE5|SNAP23|EXOC4|SMURF2|SLC12A2|NAPA|CUL3|NRP1|GNAQ|NRG1|GNAI2|NQO1|RAB11B|PLCB1|PARK7|FERMT2|DLG1|MINK1|SCRIB|MPZL1|AFDN|RAP1A|TPBG|STXBP3|STK4|STXBP1|NIBAN2|SDC1|PKP4|GIPC1|CTNND1|EPHB2|RAB1A|AMOTL1|RHOA|RAB3GAP1|CDK5|AMOTL2|DAG1|PIP5K1C|YAP1|FARP1|CTNNB1|CDC42
Reactome Pathways	Cell-extracellular matrix interactions	0.00045	3031	3.14e-05	0.334679	HSA-446353	18	6	VASP|PXN|FERMT2|ITGB1|ILK|ACTG1
GO Biological Process	Cell-matrix adhesion	2.62e-06	3031	3.41e-08	0.55817	GO:0007160	136	19	ITGAV|AJUBA|PXN|ITGA5|ITGB5|ITGA2|BCR|ITGA3|FERMT2|ITGB1|ILK|STON1|RHOA|CDK5|PTPRK|DAG1|ITGA7|PEAK1|CTNNB1
GO Biological Process	Cell-substrate adhesion	1.8e-06	3031	2.24e-08	0.574473	GO:0031589	195	23	ITGAV|AJUBA|NRP1|PXN|ITGA5|ITGB5|ITGA2|AXL|BCR|ITGA3|FERMT2|KIF14|ITGB1|ILK|STON1|RAB1A|RHOA|CDK5|PTPRK|DAG1|ITGA7|PEAK1|CTNNB1
COMPARTMENTS	Cell-substrate junction	2.3e-39	3031	6.01e-42	3.86383	GOCC:0030055	279	71	RALA|ARPC3|ADGRE5|VASP|CDC42EP1|SNAP23|CNN1|NECTIN2|RRAS2|BCAR3|ITGAV|PDGFRB|MAP2K2|ACTR3|PACSIN2|SLC9A1|RAB10|NRP1|PXN|IQGAP1|CDH2|EGFR|ITGA5|ITGB5|ANXA5|ITGA2|ARF6|MAP2K1|CTNNA1|YWHAG|MMP14|SRP68|CSPG4|ITGA3|LASP1|NEXN|EZR|PTK2|FERMT2|MAP4K4|PDLIM7|EPHA2|MSN|NCKAP1|CNN3|PDLIM1|MAPRE1|AHNAK|NHS|DNM2|ITGB1|ILK|AKAP12|PPP1R12A|ARPC1B|CORO1C|RHOA|AFAP1|FLNB|ERBIN|CFL1|DAG1|PEAK1|TLN2|CNN2|YES1|PIP5…
GO Cellular Component	Cell-substrate junction	7.41e-48	3031	3.62e-50	4.71302	GO:0030055	426	93	RALA|RPL19|ARPC3|ADGRE5|VASP|CDC42EP1|SNAP23|CNN1|NECTIN2|PI4KA|RRAS2|BCAR3|ITGAV|PDGFRB|HACD3|AJUBA|MAP2K2|ACTR3|PACSIN2|SLC9A1|CBL|RAB10|NRP1|PRKAR2A|PXN|IQGAP1|CDH2|EGFR|ITGA5|ITGB5|ANXA5|ITGA2|ARF6|MAP2K1|CTNNA1|YWHAG|MMP14|SRP68|CSPG4|ITGA3|LASP1|NEXN|EZR|PTK2|RPS2|FERMT2|MAP4K4|RPLP1|RPS3A|PDLIM7|EPHA2|PCBP2|MPZL1|MSN|NCKAP1|EPB41L2|CNN3|PDLIM1|MAPRE1|AHNAK|NHS|GDI2|DNM2|WASF1|ITGB1|ILK|AKA…
GO Biological Process	Cell-substrate junction assembly	0.0012	3031	3.07e-05	0.292082	GO:0007044	39	8	AJUBA|ITGA5|ITGA2|BCR|FERMT2|STON1|PTPRK|PEAK1
GO Biological Process	Cellular amide metabolic process	0.0193	3031	0.00073	0.171444	GO:0043603	810	39	AIMP2|RPL19|AARS1|ACAT1|IDE|ERAP1|RPS15A|FARSA|NPEPPS|TUFM|PPP2R1A|EIF4A2|FTSJ1|ACSL4|PARK7|RPS2|RPLP1|RPS3A|COPS5|RARS2|YARS1|EIF2S2|ACOT7|EIF1AX|GARS1|ASNS|RPL34|GSPT1|AARSD1|RPL6|RPL10|EIF2B1|RPS13|NNMT|RPS4Y2|RPL9|RPS7|RPL11|RPS27
GO Biological Process	Cellular amino acid metabolic process	0.0184	3031	0.00068	0.173518	GO:0006520	290	19	MRI1|AHCY|AARS1|ACAT1|QDPR|PFAS|FARSA|SRR|RARS2|YARS1|GART|GARS1|ASNS|AARSD1|MPST|GMPS|PHGDH|MTAP|MTHFD1
COMPARTMENTS	Cellular anatomical entity	3.54e-39	3031	1.23e-41	3.8451	GOCC:0110165	14060	510	RALA|BAIAP2L1|DVL2|RANBP9|MRI1|PSMC4|YTHDC2|EFNB1|SNAP29|TAB1|PYGB|TPD52L2|AHCY|PSMD10|RP2|CSK|EHD4|RIPK2|TBC1D17|CDC37|NAMPT|MPP6|SNX8|AIMP2|SERPINE1|PSMA2|YKT6|SEC61B|AK1|ACTA2|RPL19|GALK1|SLC25A11|LRRC59|CD82|ARPC3|RAB35|EXOC2|SNX17|DOK1|SLC1A4|DDX39A|ADGRE5|PLCG1|VASP|TRAP1|CANX|CDC42EP1|PMPCB|SNAP23|TSG101|CNN1|NECTIN2|HIP1R|GRWD1|EXOC4|WDR44|LGALS3|EFR3A|PI4KA|RRAS2|CCNB1|NOTCH2|ARF3|PRPH|C…
GO Cellular Component	Cellular anatomical entity	4.15e-11	3031	9.12e-13	1.0382	GO:0110165	18293	536	ARF5|RALA|BAIAP2L1|DVL2|RANBP9|MRI1|PSMC4|YTHDC2|EFNB1|SNAP29|TAB1|PYGB|TPD52L2|AHCY|PSMD10|RP2|CSK|EHD4|RIPK2|TBC1D17|CDC37|NAMPT|MPP6|SNX8|AIMP2|SERPINE1|PSMA2|YKT6|SEC61B|AK1|ACTA2|RPL19|GALK1|SLC25A11|LRRC59|CD82|ARPC3|RAB35|EXOC2|SNX17|DOK1|SLC1A4|DDX39A|ADGRE5|PLCG1|VASP|TRAP1|CANX|CDC42EP1|PMPCB|SNAP23|TSG101|CNN1|NECTIN2|NUMBL|HIP1R|GRWD1|EXOC4|WDR44|LGALS3|EFR3A|PI4KA|RRAS2|CCNB1|NOTCH2|…
GO Biological Process	Cellular biosynthetic process	0.0352	3031	0.0015	0.145346	GO:0044249	2362	89	MRI1|NAMPT|AIMP2|AK1|RPL19|EFR3A|PI4KA|AARS1|HACD3|AJUBA|ACAT1|PIK3C2A|QDPR|AKR1B1|ZDHHC5|ATP5MF|RPN1|INPPL1|HPRT1|COPS2|PFAS|RPS15A|UGDH|NQO1|FARSA|TUFM|EIF4A2|FTSJ1|SRR|ACSL4|PARK7|RPS2|DLG1|ANXA2|RPLP1|RPS3A|ATG7|ATP5F1C|COPS5|CYB5R3|MPP1|RARS2|DPM1|CMPK1|YARS1|EIF2S2|PIP4K2A|SRM|ACOT7|APRT|EIF1AX|GART|GARS1|ASNS|RPL34|NFATC4|TKT|NFIC|GSPT1|DDOST|AARSD1|RPL6|MPST|RPL10|POLR2H|EIF2B1|GPHN|GMPS|…
GO Biological Process	Cellular catabolic process	0.0264	3031	0.0011	0.15784	GO:0044248	1620	66	PSMC4|SNAP29|PYGB|AHCY|RIPK2|TBC1D17|PSMA2|SEC61B|PLCG1|CANX|TSG101|PSMC1|PSMD11|SMURF2|CBL|CUL3|RAB7A|ACAT1|IDE|VPS37B|PGD|VPS51|USP15|QDPR|UBE2L6|ERAP1|HPRT1|RAB1B|VPS37A|NPEPPS|HGS|RAB12|PLCB1|PARK7|ATG7|PSMD12|PCBP2|LONP1|COMT|KIF14|VTA1|ANXA7|PIP4K2A|ACOT7|OPTN|TRIM5|ITPA|ABCC1|ATG4B|BLVRA|RAB1A|GSPT1|TBC1D5|MPST|CUL2|NSFL1C|CDK5|PBK|BCAS3|ARL8B|SH3GLB1|CSDE1|UBAP1|CTNNB1|EIF4A3|TTC37
GO Biological Process	Cellular component assembly	2.33e-17	3031	2.67e-20	1.66326	GO:0022607	2467	149	BAIAP2L1|RANBP9|SNAP29|PSMD10|RP2|EHD4|MPP6|AIMP2|VASP|SNAP23|TSG101|NECTIN2|HIP1R|GRWD1|MPP5|PSMD11|PDGFRB|AJUBA|ACTR3|PACSIN2|EHD2|NAPA|SLC9A1|FARP2|CUL3|RAPGEF2|PDCD6|RAB7A|CDH6|NRP1|PIK3C2A|VPS37B|PXN|CDH11|CDH2|EGFR|ANK3|FLCN|NRG1|ITGA5|ABI2|ITGB5|ITGA2|RAPGEF6|DNAAF5|INPPL1|ARF6|HPRT1|BCR|CTNNA1|RAB1B|CSPG4|ACAD9|PAK2|TCP1|VPS37A|FMN2|UGDH|FARSA|LLGL1|NAPG|PPP2R1A|HGS|PLS1|BRIX1|EZR|RAP1GDS…
GO Biological Process	Cellular component biogenesis	2.89e-16	3031	3.87e-19	1.55391	GO:0044085	2702	155	BAIAP2L1|RANBP9|SNAP29|PSMD10|RP2|EHD4|MPP6|AIMP2|VASP|SNAP23|TSG101|NECTIN2|HIP1R|GRWD1|MPP5|PSMD11|PDGFRB|AJUBA|ACTR3|PACSIN2|EHD2|NAPA|SLC9A1|FARP2|CUL3|RAPGEF2|PDCD6|RAB7A|CDH6|NRP1|PIK3C2A|VPS37B|PXN|CDH11|CDH2|EGFR|ANK3|FLCN|NRG1|ITGA5|ABI2|ITGB5|ITGA2|RAPGEF6|DNAAF5|INPPL1|ARF6|HPRT1|BCR|CTNNA1|RAB1B|CSPG4|ACAD9|PAK2|TCP1|VPS37A|FMN2|UGDH|FARSA|LLGL1|NAPG|PPP2R1A|HGS|PLS1|BRIX1|EZR|RAP1GDS…
GO Biological Process	Cellular component maintenance	0.044	3031	0.002	0.135655	GO:0043954	60	7	ARF6|ITGA3|FERMT2|DLG1|FYN|KIRREL1|TPRN
GO Biological Process	Cellular component morphogenesis	1.55e-13	3031	3.95e-16	1.28097	GO:0032989	603	59	EFNB1|VASP|NECTIN2|NUMBL|NOTCH2|MPP5|TAOK1|PDGFRB|SNX1|PACSIN2|RAB10|NRP1|IQGAP1|CDH11|ANK3|IGF2BP1|BAX|HPRT1|CPNE1|TUBB3|LLGL1|PRMT3|NEXN|PTK2|MAP4K4|FYN|MINK1|EPHB4|TPM1|EPHA2|MYPN|PLXNB2|NCKAP1|TPBG|STXBP1|NIBAN2|PARD3|ABI1|SNX2|DNM2|WASF1|PICALM|PLXNA1|PPP3CB|ITGB1|EPHB2|AGFG1|NFATC4|RHOA|CDK5|DAG1|ACTG1|CYFIP1|WASF2|FARP1|DOCK10|CTNNB1|CDC42|ARHGAP35
GO Biological Process	Cellular component organization	7e-24	3031	1.79e-27	2.31549	GO:0016043	5436	270	RALA|BAIAP2L1|RANBP9|EFNB1|SNAP29|PSMD10|RP2|CSK|EHD4|MPP6|AIMP2|YKT6|ARPC3|RAB35|EXOC2|VASP|CDC42EP1|PMPCB|SNAP23|TSG101|CNN1|NECTIN2|NUMBL|HIP1R|GRWD1|EXOC4|CCNB1|NOTCH2|PRPH|MPP5|PSMD11|TAOK1|PDGFRB|SNX1|COTL1|SLC12A2|RAB2A|AJUBA|ACTR3|PACSIN2|EHD2|NAPA|SLC9A1|EHBP1|FARP2|TUBB4A|CUL3|RAPGEF2|RAB10|PDCD6|RAB7A|CDH6|NRP1|PIK3C2A|VPS37B|PXN|IQGAP1|CDH11|CDH2|RASA1|EGFR|VPS51|ANK3|FLCN|NRG1|MYO1E|…
GO Biological Process	Cellular component organization or biogenesis	3.77e-23	3031	1.68e-26	2.24237	GO:0071840	5639	274	RALA|BAIAP2L1|RANBP9|EFNB1|SNAP29|PSMD10|RP2|CSK|EHD4|MPP6|AIMP2|YKT6|ARPC3|RAB35|EXOC2|VASP|CDC42EP1|PMPCB|SNAP23|TSG101|CNN1|NECTIN2|NUMBL|HIP1R|GRWD1|EXOC4|CCNB1|NOTCH2|PRPH|MPP5|PSMD11|TAOK1|PDGFRB|SNX1|COTL1|SLC12A2|RAB2A|AJUBA|ACTR3|PACSIN2|EHD2|NAPA|SLC9A1|EHBP1|FARP2|TUBB4A|CUL3|RAPGEF2|RAB10|PDCD6|RAB7A|CDH6|NRP1|PIK3C2A|VPS37B|PXN|IQGAP1|CDH11|CDH2|RASA1|EGFR|VPS51|ANK3|FLCN|NRG1|MYO1E|…
GO Biological Process	Cellular developmental process	1.46e-12	3031	4.92e-15	1.18356	GO:0048869	3530	173	YTHDC2|EFNB1|CSK|RIPK2|AIMP2|ACTA2|RAB35|VASP|TSG101|NECTIN2|NUMBL|LGALS3|RRAS2|NOTCH2|ITGAV|MPP5|PSMD11|TAOK1|PDGFRB|SNX1|PACSIN2|NAPA|SLC9A1|FARP2|CUL3|RAPGEF2|RAB10|PDCD6|NRP1|PXN|IQGAP1|CDH11|CDH2|SCYL1|RASA1|EGFR|DOCK11|ANK3|SH3RF1|AKR1B1|NRG1|MYO1E|IGF2BP1|BAX|ITGA5|ABI2|ITGB5|ITGA2|ERAP1|ARF6|HPRT1|COPS2|STAT6|CRK|AXL|MAP2K1|BCR|CTNNA1|MMP14|CSPG4|PAK2|ITGA3|CPNE1|MET|FMN2|BASP1|UGDH|TUBB3…
GO Biological Process	Cellular localization	1.14e-22	3031	7.24e-26	2.19431	GO:0051641	2677	170	ARF5|RALA|DVL2|SNAP29|PSMD10|RP2|EHD4|TBC1D17|CDC37|SNX8|YKT6|SEC61B|RAB35|EXOC2|SNX17|DDX39A|CANX|PMPCB|SNAP23|TSG101|NECTIN2|HIP1R|EXOC4|EFR3A|CCNB1|ARF3|IPO5|MPP5|SNX1|RAB2A|AJUBA|PACSIN2|EHD2|NAPA|SLC9A1|EHBP1|ARCN1|CBL|CUL3|RAPGEF2|RAB10|PDCD6|RAB7A|NRP1|TNPO3|SRI|VPS37B|CDH2|SCYL1|ARL8A|EGFR|VPS51|ANK3|MYO1E|BAX|ITGA2|RAPGEF6|ARF6|CRK|AXL|BCR|CTNNA1|DDX19A|YWHAG|SEC23A|RAB1B|ARHGAP1|SRP68|P…
GO Biological Process	Cellular metabolic compound salvage	0.0104	3031	0.00035	0.198297	GO:0043094	30	6	MRI1|HPRT1|APRT|ADSL|MTAP|AMPD2
GO Biological Process	Cellular metabolic process	3.02e-05	3031	5.03e-07	0.451999	GO:0044237	6568	236	MRI1|PSMC4|SNAP29|TAB1|PYGB|AHCY|CSK|RIPK2|TBC1D17|NAMPT|AIMP2|SERPINE1|PSMA2|SEC61B|AK1|RPL19|GALK1|DDX39A|PLCG1|CANX|TSG101|GRWD1|LGALS3|EFR3A|PI4KA|CCNB1|TBRG4|PSMC1|PSMD11|TAOK1|AARS1|PDGFRB|HACD3|SMURF2|AJUBA|MAP2K2|CBL|CUL3|RAB7A|NRP1|PRKAR2A|ACAT1|PIK3C2A|IDE|VPS37B|PFKL|SCYL1|PGD|EGFR|NONO|VPS51|USP15|QDPR|RPIA|AKR1B1|UBE2L6|ZDHHC5|NRG1|ATP5MF|BAX|ABI2|RPN1|ERAP1|INPPL1|HPRT1|COPS2|STAT6|…
GO Biological Process	Cellular nitrogen compound biosynthetic process	0.0027	3031	7.46e-05	0.256864	GO:0044271	1494	67	NAMPT|AIMP2|AK1|RPL19|AARS1|ACAT1|QDPR|ATP5MF|HPRT1|COPS2|PFAS|RPS15A|UGDH|NQO1|FARSA|TUFM|EIF4A2|FTSJ1|ACSL4|RPS2|DLG1|ANXA2|RPLP1|RPS3A|ATP5F1C|COPS5|CYB5R3|MPP1|RARS2|CMPK1|YARS1|EIF2S2|SRM|ACOT7|APRT|EIF1AX|GART|GARS1|ASNS|RPL34|NFATC4|NFIC|GSPT1|AARSD1|RPL6|RPL10|POLR2H|EIF2B1|GMPS|PARP10|RPS13|TJP2|NNMT|COASY|CCDC124|ADSL|RPS4Y2|MTAP|RPL9|CASK|RPS7|CTNNB1|RPL11|MTHFD1|MED19|RPS27|AMPD2
GO Biological Process	Cellular process	8.96e-28	3031	5.71e-32	2.70477	GO:0009987	14826	510	ARF5|RALA|BAIAP2L1|DVL2|RANBP9|MRI1|PSMC4|YTHDC2|EFNB1|SNAP29|TAB1|PYGB|AHCY|PSMD10|RP2|CSK|EHD4|RIPK2|TBC1D17|CDC37|NAMPT|MPP6|SNX8|AIMP2|SERPINE1|PSMA2|YKT6|SEC61B|AK1|ACTA2|RPL19|GALK1|SLC25A11|LRRC59|ARPC3|RAB35|EXOC2|SNX17|DOK1|SLC1A4|DDX39A|ADGRE5|PLCG1|VASP|TRAP1|CANX|CDC42EP1|PMPCB|SNAP23|TSG101|CNN1|NECTIN2|NUMBL|HIP1R|GRWD1|EXOC4|LGALS3|EFR3A|PI4KA|RRAS2|CCNB1|NOTCH2|ARF3|PRPH|CCT7|TBRG…
GO Biological Process	Cellular response to chemical stimulus	4.43e-09	3031	3.34e-11	0.83536	GO:0070887	2609	129	TAB1|CSK|EHD4|RIPK2|SERPINE1|RAB35|DOK1|PLCG1|NUMBL|LGALS3|NOTCH2|BCAR3|IPO5|PDGFRB|SLC12A2|ACTR3|SLC9A1|CBL|CUL3|RAPGEF2|RAB10|NRP1|PIK3C2A|IDE|PXN|IQGAP1|RALB|EGFR|USP15|ANK3|FLCN|AKR1B1|GNAQ|BAX|ITGB5|ITGA2|ARF6|STAT6|CRK|AXL|BCR|CTNNA1|YWHAG|GNAI2|PAK2|CPNE1|FMN2|NQO1|PKM|NPEPPS|EIF4A2|RAB12|RAB11B|PLCB1|EZR|PARK7|RAP1GDS1|MTSS2|PTK2|FERMT2|DPYSL3|CTSB|ATG7|FYN|ATP2B4|TPM1|EPHA2|CASP8|MSN|MYL…
GO Biological Process	Cellular response to chemical stress	0.0017	3031	4.34e-05	0.276955	GO:0062197	272	21	PXN|EGFR|AKR1B1|STAT6|AXL|NQO1|PARK7|ATG7|FYN|TPM1|MYLK|LONP1|CHUK|ADPRHL2|XRCC5|ABCC1|SLC2A1|PTPRK|CCS|SIRPA|SERPINB6
Reactome Pathways	Cellular response to chemical stress	0.0053	3031	0.00054	0.227572	HSA-9711123	195	15	PSMC4|PSMD10|PSMA2|PSMC1|PSMD11|CUL3|PGD|NQO1|PSMD12|PSME1|ABCC1|BLVRA|TKT|TXNRD1|CCS
GO Biological Process	Cellular response to endogenous stimulus	2.79e-07	3031	2.83e-09	0.65544	GO:0071495	1103	67	TAB1|CSK|RIPK2|RAB35|PLCG1|NOTCH2|BCAR3|IPO5|PDGFRB|SLC9A1|CBL|RAPGEF2|RAB10|PIK3C2A|IDE|PXN|IQGAP1|EGFR|USP15|FLCN|ITGB5|ARF6|STAT6|CRK|CTNNA1|YWHAG|PAK2|PKM|RAB12|PLCB1|EZR|RAP1GDS1|MTSS2|PTK2|FERMT2|CTSB|FYN|ATP2B4|RAB13|MAP3K7|RAP1A|GNAI3|APRT|DNM2|WASF1|ABCC1|EPHB2|SH3BP4|ATP2B1|RHOA|SHC1|CDK5|PTPRK|C2CD5|ATP1A1|YES1|PDCD5|WBP2|BCAS3|PPP1R9B|YAP1|EHD1|CYFIP1|CTNNB1|RDX|EIF4A3|JAK1
GO Biological Process	Cellular response to external stimulus	0.0412	3031	0.0018	0.13851	GO:0071496	317	19	SLC9A1|CBL|RALB|FLCN|ITGA2|AXL|ATG7|CASP8|COMT|MYBBP1A|ASNS|ATP2B1|SLC2A1|PRKAB1|DAG1|CNN2|PPP1R9B|SH3GLB1|ARHGAP35
GO Biological Process	Cellular response to growth factor stimulus	5.23e-05	3031	9.23e-07	0.42815	GO:0071363	473	34	TAB1|EHD4|RAB35|PLCG1|NOTCH2|PDGFRB|CBL|RAPGEF2|NRP1|PXN|IQGAP1|EGFR|USP15|FLCN|ITGB5|ARF6|CRK|PAK2|MTSS2|PTK2|FERMT2|FYN|MAP3K7|RAP1A|WASF1|SHC1|PTPRK|YES1|PDCD5|PPP1R9B|EHD1|CTNNB1|RDX|EIF4A3
GO Biological Process	Cellular response to hormone stimulus	0.005	3031	0.00016	0.230103	GO:0032870	489	29	CSK|BCAR3|SLC9A1|RAB10|PIK3C2A|IDE|PXN|STAT6|CRK|YWHAG|PKM|RAB12|PLCB1|RAP1GDS1|PTK2|CTSB|RAB13|APRT|ATP2B1|RHOA|SHC1|C2CD5|ATP1A1|WBP2|BCAS3|YAP1|CYFIP1|RDX|JAK1
STRING Clusters	Cellular response to indole-3-methanol, and Positive regulation of synaptic vesicle clustering	0.0386	3031	0.00096	0.141341	CL:21890	5	3	CDH2|CTNNA1|CTNNB1
GO Biological Process	Cellular response to insulin stimulus	0.0115	3031	0.00039	0.19393	GO:0032869	148	13	BCAR3|SLC9A1|RAB10|PIK3C2A|IDE|YWHAG|PKM|RAB12|RAB13|APRT|SHC1|C2CD5|CYFIP1
GO Biological Process	Cellular response to nerve growth factor stimulus	0.00068	3031	1.59e-05	0.316749	GO:1990090	47	9	RAB35|CBL|RAPGEF2|ARF6|CRK|RAP1A|WASF1|EHD1|EIF4A3
GO Biological Process	Cellular response to nitrogen compound	5.77e-05	3031	1.04e-06	0.423882	GO:1901699	637	41	CSK|RIPK2|BCAR3|IPO5|SLC9A1|RAPGEF2|RAB10|PIK3C2A|IDE|PXN|RALB|EGFR|GNAQ|STAT6|CRK|CTNNA1|YWHAG|GNAI2|PKM|RAB12|PLCB1|EZR|RAP1GDS1|PTK2|FYN|ATP2B4|RAB13|RAP1A|GNAI3|APRT|DNM2|ABCC1|EPHB2|SH3BP4|SHC1|CDK5|C2CD5|PPP1R9B|CYFIP1|CTNNB1|JAK1
GO Biological Process	Cellular response to organic substance	3.08e-08	3031	2.65e-10	0.751145	GO:0071310	2019	105	TAB1|CSK|EHD4|RIPK2|SERPINE1|RAB35|DOK1|PLCG1|NUMBL|NOTCH2|BCAR3|IPO5|PDGFRB|SLC12A2|ACTR3|SLC9A1|CBL|CUL3|RAPGEF2|RAB10|NRP1|PIK3C2A|IDE|PXN|IQGAP1|RALB|EGFR|USP15|FLCN|BAX|ITGB5|ITGA2|ARF6|STAT6|CRK|AXL|BCR|CTNNA1|YWHAG|PAK2|PKM|EIF4A2|RAB12|RAB11B|PLCB1|EZR|PARK7|RAP1GDS1|MTSS2|PTK2|FERMT2|DPYSL3|CTSB|FYN|ATP2B4|CASP8|MSN|IQGAP3|RAB13|MAP3K7|RAP1A|GNAI3|STXBP3|CHUK|STXBP1|HSPA1L|SRM|APRT|OPTN|…
GO Biological Process	Cellular response to organonitrogen compound	7.49e-05	3031	1.39e-06	0.412552	GO:0071417	574	38	CSK|RIPK2|BCAR3|IPO5|SLC9A1|RAPGEF2|RAB10|PIK3C2A|IDE|PXN|EGFR|STAT6|CRK|CTNNA1|YWHAG|PKM|RAB12|PLCB1|EZR|RAP1GDS1|PTK2|FYN|ATP2B4|RAB13|RAP1A|GNAI3|APRT|DNM2|ABCC1|EPHB2|SH3BP4|SHC1|CDK5|C2CD5|PPP1R9B|CYFIP1|CTNNB1|JAK1
GO Biological Process	Cellular response to oxidative stress	0.0438	3031	0.002	0.135853	GO:0034599	224	15	PXN|EGFR|STAT6|AXL|NQO1|PARK7|FYN|TPM1|LONP1|CHUK|ADPRHL2|ABCC1|PTPRK|CCS|SIRPA
GO Biological Process	Cellular response to oxygen-containing compound	1.26e-05	3031	1.95e-07	0.489963	GO:1901701	1057	60	CSK|RIPK2|SERPINE1|BCAR3|IPO5|SLC9A1|RAPGEF2|RAB10|PIK3C2A|IDE|PXN|EGFR|GNAQ|ITGA2|STAT6|CRK|AXL|BCR|CTNNA1|YWHAG|GNAI2|NQO1|PKM|RAB12|RAB11B|PLCB1|EZR|PARK7|RAP1GDS1|PTK2|FYN|ATP2B4|TPM1|MSN|RAB13|RAP1A|GNAI3|CHUK|ADPRHL2|APRT|DNM2|XRCC5|ABCC1|EPHB2|SH3BP4|ATP2B1|RHOA|SHC1|CDK5|PTPRK|CCS|DAG1|C2CD5|YES1|SIRPA|PPP1R9B|YAP1|CYFIP1|CTNNB1|JAK1
GO Biological Process	Cellular response to peptide	1.7e-05	3031	2.66e-07	0.476955	GO:1901653	302	27	CSK|RIPK2|BCAR3|SLC9A1|RAB10|PIK3C2A|IDE|PXN|STAT6|CRK|YWHAG|PKM|RAB12|PLCB1|RAP1GDS1|PTK2|FYN|RAB13|APRT|ABCC1|EPHB2|SHC1|CDK5|C2CD5|PPP1R9B|CYFIP1|JAK1
GO Biological Process	Cellular response to peptide hormone stimulus	0.00035	3031	7.67e-06	0.345593	GO:0071375	240	21	CSK|BCAR3|SLC9A1|RAB10|PIK3C2A|IDE|PXN|STAT6|CRK|YWHAG|PKM|RAB12|PLCB1|RAP1GDS1|PTK2|RAB13|APRT|SHC1|C2CD5|CYFIP1|JAK1
GO Biological Process	Cellular response to platelet-derived growth factor stimulus	0.0006	3031	1.4e-05	0.322185	GO:0036120	24	7	PDGFRB|CBL|IQGAP1|MTSS2|FYN|YES1|RDX
GO Biological Process	Cellular response to reactive oxygen species	0.0019	3031	4.95e-05	0.272125	GO:0034614	118	13	PXN|EGFR|STAT6|AXL|NQO1|PARK7|FYN|TPM1|CHUK|ADPRHL2|PTPRK|CCS|SIRPA
Reactome Pathways	Cellular response to starvation	6.24e-06	3031	2.19e-07	0.520482	HSA-9711097	155	19	RPL19|FLCN|RPS15A|RPS2|RPLP1|RPS3A|EIF2S2|ASNS|RPL34|SH3BP4|RPL6|RPL10|ATP6V1C1|RPS13|RPS4Y2|RPL9|RPS7|RPL11|RPS27
GO Biological Process	Cellular response to stimulus	4.55e-10	3031	2.7e-12	0.934199	GO:0051716	6357	253	RALA|DVL2|RANBP9|EFNB1|TAB1|CSK|EHD4|RIPK2|CDC37|NAMPT|SERPINE1|SEC61B|LRRC59|RAB35|SNX17|DOK1|ADGRE5|PLCG1|CANX|CDC42EP1|NUMBL|LGALS3|PI4KA|RRAS2|NOTCH2|BCAR3|ITGAV|IPO5|TAOK1|PDGFRB|HACD3|SMURF2|SLC12A2|AJUBA|MAP2K2|ACTR3|PPP1R12C|SLC9A1|CBL|FARP2|CUL3|RAPGEF2|RAB10|PDCD6|CDH6|NRP1|PRKAR2A|SRI|PIK3C2A|IDE|PXN|IQGAP1|RALB|RASA1|EGFR|NONO|DOCK11|USP15|ANK3|FLCN|AKR1B1|GNAQ|NRG1|MYO1E|IGF2BP1|BAX|…
GO Biological Process	Cellular response to transforming growth factor beta stimulus	0.0047	3031	0.00014	0.23279	GO:0071560	151	14	TAB1|PXN|USP15|FLCN|ITGB5|CRK|PAK2|PTK2|FERMT2|FYN|MAP3K7|PTPRK|YES1|PDCD5
Reactome Pathways	Cellular responses to stress	8.74e-07	3031	2.03e-08	0.605849	HSA-2262752	747	50	PSMC4|PSMD10|PSMA2|RPL19|PSMC1|PSMD11|AJUBA|TUBB4A|CUL3|PGD|FLCN|DNAJA2|RPS15A|TUBB6|NQO1|TUBB3|PDIA5|TUBB4B|RPS2|MAP4K4|RPLP1|RPS3A|MINK1|PSMD12|EIF2S2|HSPA1L|PSME1|ASNS|RPL34|SEC31A|ABCC1|BLVRA|SH3BP4|TKT|SHC1|RPL6|RPL10|CUL2|ATP6V1C1|TXNRD1|RPS13|CCS|TUBA1C|RPS4Y2|HSPH1|HSPA12A|RPL9|RPS7|RPL11|RPS27
KEGG Pathways	Central carbon metabolism in cancer	0.00034	3031	4.16e-05	0.346852	hsa05230	68	10	PDGFRB|MAP2K2|PFKL|EGFR|MAP2K1|MET|PKM|NRAS|SLC2A1|SLC1A5
TISSUES	Central nervous system	9.91e-44	3031	4.49e-46	4.30039	BTO:0000227	5825	322	ARF5|RANBP9|MRI1|EFNB1|SNAP29|TAB1|PYGB|TPD52L2|AHCY|PSMD10|CSK|TBC1D17|PSMA2|YKT6|ACTA2|RPL19|GALK1|SLC25A11|LRRC59|ARPC3|RAB35|EXOC2|SNX17|SLC1A4|PLCG1|VASP|TRAP1|CANX|PMPCB|NECTIN2|HIP1R|GRWD1|EXOC4|WDR44|LGALS3|PI4KA|NOTCH2|ARF3|PRPH|CCT7|TBRG4|PSMC1|IPO5|MPP5|TAOK1|PDGFRB|HACD3|COTL1|RAB2A|ACTR3|PACSIN2|EHD2|NAPA|EHBP1|ARCN1|FARP2|TUBB4A|CUL3|RAB10|PDCD6|RAB7A|PRKAR2A|SRI|PXN|CDH11|CDH2|SCYL…
GO Biological Process	Central nervous system development	3.28e-06	3031	4.38e-08	0.548413	GO:0007417	1035	61	CSK|NUMBL|MPP5|TAOK1|AARS1|NAPA|ARCN1|RAPGEF2|NRP1|ACAT1|CDH11|CDH2|SCYL1|EGFR|VPS51|NRG1|IGF2BP1|BAX|HPRT1|CRK|AXL|MAP2K1|BCR|CTNNA1|BASP1|ENO3|PLCB1|SRR|FYN|MINK1|SCRIB|ATP2B4|ANKLE2|PLXNB2|NCKAP1|KIF14|GNAI3|STXBP3|DLG5|STK4|GART|XRCC5|PLXNA1|TAGLN3|FAT4|ITGB1|CTNND1|EPHB2|ATP2B1|RHOA|RAB3GAP1|MPST|EIF2B1|SLC2A1|CDK5|SRGAP2C|PPP1R9B|PHGDH|CTNNB1|CDC42|ARHGAP35
GO Biological Process	Central nervous system neuron development	0.0076	3031	0.00024	0.211919	GO:0021954	86	10	MPP5|TAOK1|RAPGEF2|NRP1|CDH11|HPRT1|PLXNA1|EPHB2|CDK5|ARHGAP35
Monarch Phenotype	Cerebellar hypoplasia	0.0303	3031	0.00061	0.151856	HP:0001321	358	22	AHCY|PI4KA|MAP2K2|NONO|VPS51|TUBB3|PPP2R1A|RAB11B|EXOC7|KIF14|NRAS|RARS2|ASNS|FAT4|RAB3GAP1|RPL10|GPHN|DAG1|COASY|PHGDH|CASK|CDC42
TISSUES	Cerebral cortex	0.0033	3031	0.00012	0.248149	BTO:0000233	1118	53	PSMD10|SLC1A4|VASP|RAB2A|ARL8A|RALB|ANK3|AKR1B1|GNAQ|NRG1|RPN1|INPPL1|ABR|CTNNA1|DNAJA2|BASP1|NQO1|MPDZ|EPB41L1|PARK7|TP53BP2|PLS3|GMFB|MYLK|IPO9|CALD1|AFDN|MPP1|CNN3|STXBP1|PIP4K2A|ACOT7|AHNAK|GARS1|PKP4|RAB2B|ATP2B1|NFIC|DDOST|GPHN|PPP2R5D|RAN|PRAF2|RSL1D1|PPP1R9B|ARL8B|SEPTIN2|UBAP1|CTNNB1|RDX|PCMT1|CAPN5|MTHFD1
GO Biological Process	Cerebral cortex development	0.00019	3031	3.97e-06	0.372125	GO:0021987	122	15	MPP5|CDH2|EGFR|BAX|CRK|PLCB1|KIF14|GART|FAT4|RHOA|SLC2A1|CDK5|SRGAP2C|PPP1R9B|CTNNB1
TISSUES	Cerebral hemisphere	0.0073	3031	0.00028	0.213668	BTO:0000231	1187	54	PSMD10|SLC1A4|VASP|RAB2A|ARL8A|RALB|ANK3|AKR1B1|GNAQ|NRG1|RPN1|INPPL1|ABR|CTNNA1|DNAJA2|BASP1|NQO1|MPDZ|EPB41L1|PARK7|TP53BP2|PLS3|GMFB|MYLK|COMT|IPO9|CALD1|AFDN|MPP1|CNN3|STXBP1|PIP4K2A|ACOT7|AHNAK|GARS1|PKP4|RAB2B|ATP2B1|NFIC|DDOST|GPHN|PPP2R5D|RAN|PRAF2|RSL1D1|PPP1R9B|ARL8B|SEPTIN2|UBAP1|CTNNB1|RDX|PCMT1|CAPN5|MTHFD1
Monarch Phenotype	Cerebral hypomyelination	0.0048	3031	5.7e-05	0.231876	HP:0006808	31	7	SLC1A4|TUBB4A|CYB5R3|STXBP1|EIF2B1|ADSL|PHGDH
TISSUES	Cerebral lobe	0.0335	3031	0.0015	0.147496	BTO:0000445	759	36	SLC1A4|ANK3|NRG1|RPN1|INPPL1|ABR|CTNNA1|DNAJA2|NQO1|MPDZ|EPB41L1|TP53BP2|PLS3|GMFB|MYLK|IPO9|AFDN|MPP1|CNN3|STXBP1|PIP4K2A|ACOT7|AHNAK|GARS1|PKP4|GPHN|RAN|PRAF2|PPP1R9B|ARL8B|SEPTIN2|UBAP1|CTNNB1|RDX|CAPN5|MTHFD1
TISSUES	Cervical carcinoma cell	1.57e-09	3031	3.69e-11	0.88041	BTO:0000180	322	35	CANX|NUMBL|CCNB1|NOTCH2|SLC9A1|PXN|EGFR|IGF2BP1|ANXA5|AXL|MAP2K1|MET|NQO1|PKM|EZR|PTK2|DLG1|ANXA2|ATG7|SCRIB|COPS5|PTPN14|CHUK|FSCN1|XRCC5|ITGB1|ABCC1|AMOTL1|CUL2|SLC2A1|CFL1|YAP1|PHGDH|CTNNB1|ENO1
KEGG Pathways	cGMP-PKG signaling pathway	7.56e-05	3031	6.97e-06	0.412148	hsa04022	163	17	VASP|MAP2K2|GNAQ|MAP2K1|GNAI2|PLCB1|ATP2B4|MYLK|GNAI3|SLC25A6|PPP3CB|NFATC4|PPP1R12A|ATP2B1|RHOA|PLCB3|ATP1A1
InterPro Domains	CH domain superfamily	9.32e-05	3031	2.21e-07	0.403058	IPR036872	81	14	CNN1|EHBP1|IQGAP1|PLS1|PLS3|IQGAP3|UTRN|TAGLN2|CNN3|MAPRE1|TAGLN|TAGLN3|FLNB|CNN2
KEGG Pathways	Chagas disease	0.0091	3031	0.0021	0.204096	hsa05142	97	9	SERPINE1|GNAQ|GNAI2|PPP2R1A|PLCB1|CASP8|GNAI3|CHUK|PLCB3
UniProt Keywords	Chaperone	0.0028	3031	0.0002	0.255284	KW-0143	197	16	PSMD10|CDC37|TRAP1|CANX|CCT7|COTL1|CCT6A|CCT5|DNAJA2|TCP1|PARK7|DNAJB4|CCT4|PFDN6|SERPINH1|CCS
COMPARTMENTS	Chaperone complex	0.0033	3031	0.00015	0.248149	GOCC:0101031	37	7	CDC37|CCT7|CCT6A|CCT5|TCP1|CCT4|PFDN6
GO Cellular Component	Chaperone complex	0.0036	3031	0.00026	0.24437	GO:0101031	41	7	CDC37|CCT7|CCT6A|CCT5|TCP1|CCT4|PFDN6
STRING Clusters	Chaperone complex, and Prefoldin	0.005	3031	6.79e-05	0.230103	CL:1879	32	7	CDC37|CCT7|CCT6A|CCT5|TCP1|CCT4|PFDN6
InterPro Domains	Chaperone tailless complex polypeptide 1 (TCP-1)	0.0059	3031	3.19e-05	0.222915	IPR017998	10	5	CCT7|CCT6A|CCT5|TCP1|CCT4
GO Biological Process	Chaperone-mediated protein folding	0.0085	3031	0.00028	0.207058	GO:0061077	71	9	TRAP1|CCT7|CCT6A|CCT5|TCP1|DNAJB4|HSPA1L|CCT4|HSPH1
InterPro Domains	Chaperonin Cpn60/GroEL/TCP-1 family	0.0204	3031	0.00015	0.169037	IPR002423	15	5	CCT7|CCT6A|CCT5|TCP1|CCT4
InterPro Domains	Chaperonin TCP-1, conserved site	0.0041	3031	2.18e-05	0.238722	IPR002194	9	5	CCT7|CCT6A|CCT5|TCP1|CCT4
STRING Clusters	Chaperonin TCP-1, conserved site	0.0063	3031	9.26e-05	0.220066	CL:1885	6	4	CCT7|CCT6A|CCT5|CCT4
STRING Clusters	Chaperonin TCP-1, conserved site, and Cellular proteostasis	0.006	3031	8.53e-05	0.222185	CL:1883	13	5	CCT7|CCT6A|CCT5|TCP1|CCT4
COMPARTMENTS	Chaperonin-containing T-complex	0.00081	3031	3.19e-05	0.309151	GOCC:0005832	10	5	CCT7|CCT6A|CCT5|TCP1|CCT4
GO Cellular Component	Chaperonin-containing T-complex	0.00051	3031	3.19e-05	0.329243	GO:0005832	10	5	CCT7|CCT6A|CCT5|TCP1|CCT4
STRING Clusters	Chaperonin-containing T-complex, and Cellular proteostasis	0.0058	3031	8.02e-05	0.223657	CL:1880	22	6	CDC37|CCT7|CCT6A|CCT5|TCP1|CCT4
Reactome Pathways	Chaperonin-mediated protein folding	0.00031	3031	1.94e-05	0.350864	HSA-390466	91	12	CCT7|TUBB4A|CCT6A|CCT5|GNAQ|TCP1|TUBB6|TUBB3|TUBB4B|CCT4|PFDN6|TUBA1C
UniProt Keywords	Charcot-Marie-Tooth disease	0.0154	3031	0.0013	0.181248	KW-0144	55	7	AARS1|RAB7A|YARS1|SBF1|DNM2|GARS1|ATP1A1
KEGG Pathways	Chemokine signaling pathway	0.0008	3031	0.00011	0.309691	hsa04062	186	16	PLCG1|GNAQ|CRK|MAP2K1|GNAI2|PLCB1|PTK2|NRAS|RAP1A|GNAI3|CHUK|PARD3|RHOA|SHC1|PLCB3|CDC42
WikiPathways	Chemokine signaling pathway	0.0016	3031	0.0001	0.279588	WP3929	165	15	CSK|PXN|CRK|MAP2K1|GNAI2|PLCB1|PTK2|NRAS|RAP1A|GNAI3|CHUK|PARD3|SHC1|PLCB3|CDC42
GO Biological Process	Chemotaxis	0.00011	3031	2.2e-06	0.395861	GO:0006935	516	35	RALA|EFNB1|VASP|LGALS3|NOTCH2|ITGAV|PDGFRB|SLC12A2|NRP1|NRG1|CRK|MAP2K1|MET|TUBB3|NEXN|PTK2|FYN|SCRIB|EPHB4|EPHA2|MYPN|PLXNB2|RAB13|TPBG|AMOT|NIBAN2|PLXNA1|ABCC1|EPHB2|RHOA|CDK5|DAG1|PIP5K1C|CYFIP1|ARHGAP35
Reactome Pathways	CHL1 interactions	0.0239	3031	0.0035	0.16216	HSA-447041	9	3	NRP1|ITGA2|ITGB1
KEGG Pathways	Choline metabolism in cancer	0.0081	3031	0.0019	0.209151	hsa05231	95	9	PLCG1|PDGFRB|MAP2K2|EGFR|MAP2K1|NRAS|WASF1|PIP5K1C|WASF2
KEGG Pathways	Cholinergic synapse	0.0396	3031	0.0132	0.14023	hsa04725	109	8	GNAQ|MAP2K1|GNAI2|PLCB1|FYN|NRAS|GNAI3|PLCB3
GO Biological Process	Chordate embryonic development	0.0037	3031	0.00011	0.24318	GO:0043009	654	36	RALA|DVL2|PSMC4|TAB1|VASP|CCNB1|NOTCH2|CUL3|PDCD6|EGFR|FLCN|MYO1E|COPS2|MAP2K1|MMP14|RIC8A|DLG1|SCRIB|EPHA2|CASP8|PLXNB2|NSDHL|AMOT|STK4|PHACTR4|EIF2S2|ABI1|ITGB1|EPN1|YAP1|PHGDH|RPS7|CTNNB1|EIF4A3|MTHFD1|ARHGAP35
WikiPathways	Chromosomal and microsatellite instability in colorectal cancer	0.0413	3031	0.0051	0.138405	WP4216	72	7	RALA|EXOC2|RALB|BAX|MAP2K1|RHOA|CTNNB1
TISSUES	Chronic lymphocytic leukemia cell	0.00026	3031	8.47e-06	0.358503	BTO:0001546	222	20	DVL2|CD82|PLCG1|CANX|NOTCH2|CBL|BCR|PKM|ARHGEF1|ATG7|SBF1|XRCC5|ITGB1|ABCC1|SHC1|SLC2A1|CFL1|TXNRD1|DOCK10|CTNNB1
KEGG Pathways	Chronic myeloid leukemia	0.0025	3031	0.0004	0.260206	hsa05220	75	9	MAP2K2|CBL|BAX|CRK|MAP2K1|BCR|NRAS|CHUK|SHC1
Monarch Phenotype	Chylothorax	0.0413	3031	0.0009	0.138405	HP:0010310	13	4	CBL|RASA1|EPHB4|FAT4
WikiPathways	Ciliary landscape	0.00015	3031	5.12e-06	0.382391	WP4352	214	20	RANBP9|PSMC4|SNAP29|EXOC2|EXOC4|RAB2A|EHBP1|IQGAP1|RALB|COPS2|NUDC|EXOC7|PSMD12|COPS5|IQGAP3|TIPRL|GDI1|YAP1|ARL8B|CTNNB1
Reactome Pathways	Cilium Assembly	0.0027	3031	0.00024	0.256864	HSA-5617833	200	16	RP2|EXOC2|EXOC4|TUBB4A|CCT5|YWHAG|TCP1|TUBB6|TUBB3|PPP2R1A|EXOC7|TUBB4B|MAPRE1|CCT4|TUBA1C|SEPTIN2
GO Biological Process	Circulatory system development	8.95e-08	3031	8.33e-10	0.704818	GO:0072359	901	60	DVL2|TAB1|SERPINE1|ACTA2|SNX17|NOTCH2|ITGAV|PDGFRB|MAP2K2|SLC9A1|RAPGEF2|PDCD6|NRP1|SRI|CDH2|RASA1|NRG1|MYO1E|BAX|ITGA5|ERAP1|MAP2K1|MMP14|CSPG4|ITGA3|RIC8A|FMNL3|PTK2|ANXA2|PDLIM7|AP1B1|EPHB4|TPM1|EPHA2|CASP8|MYLK|CALD1|PTPN14|NSDHL|PDLIM1|AMOT|STK4|BICC1|CLIC4|PPP3CB|ITGB1|ILK|EPHB2|AMOTL1|NFATC4|SHC1|AMOTL2|DAG1|ACTG1|BCAS3|YAP1|WASF2|CTNNB1|CDC42|MTHFD1
GO Biological Process	Circulatory system process	0.0216	3031	0.00082	0.166555	GO:0003013	493	27	ACTA2|SLC1A4|SLC12A2|SLC9A1|PIK3C2A|ERAP1|BCR|RAP1GDS1|FERMT2|FYN|ATP2B4|TPM1|CYB5R3|AMOT|ABCC1|AKAP12|ATP2B1|RHOA|SLC2A1|TJP2|PLCB3|SLC1A5|ATP1A1|YES1|YAP1|CDC42|ARHGAP35
WikiPathways	CKAP4 signaling pathway map	0.0002	3031	8.4e-06	0.369897	WP5322	114	14	SERPINE1|CCNB1|MAP2K2|EGFR|BAX|ITGA5|MAP2K1|MMP14|CASP8|PARD3|SDC1|ITGB1|CAND1|CTNNB1
Reactome Pathways	Class I MHC mediated antigen processing & presentation	0.0048	3031	0.00049	0.231876	HSA-983169	376	23	PSMC4|PSMD10|PSMA2|SEC61B|CANX|SNAP23|ITGAV|PSMC1|PSMD11|SMURF2|CUL3|SH3RF1|UBE2L6|ITGB5|ERAP1|SEC23A|NPEPPS|ATG7|PSMD12|CHUK|PSME1|SEC31A|CUL2
GO Molecular Function	Clathrin binding	0.0131	3031	0.00023	0.188273	GO:0030276	69	9	HIP1R|PIK3C2A|AP2A2|AP1B1|AP2A1|PICALM|STON1|EPN1|CLINT1
COMPARTMENTS	Clathrin coat	0.00058	3031	2.2e-05	0.323657	GOCC:0030118	37	8	AP2A2|AP1B1|AP2A1|DNM2|PICALM|NECAP2|EPN1|CLINT1
GO Cellular Component	Clathrin coat	0.005	3031	0.00039	0.230103	GO:0030118	44	7	AP2A2|AP1B1|AP2A1|PICALM|NECAP2|EPN1|CLINT1
GO Biological Process	Clathrin coat assembly	0.0397	3031	0.0017	0.140121	GO:0048268	16	4	HIP1R|PIK3C2A|PICALM|FCHO2
STRING Clusters	Clathrin coat of coated pit, and Epsin N-terminal homology (ENTH) domain	0.0386	3031	0.00093	0.141341	CL:13775	24	5	HIP1R|AP2A2|ITSN2|AP2A1|NECAP2
STRING Clusters	Clathrin coat, and Eps15 homology domain	0.00015	3031	3.59e-07	0.382391	CL:13771	37	10	HIP1R|AP2A2|ITSN2|AP2A1|PICALM|NECAP2|REPS1|FCHO2|EPN1|CLINT1
STRING Clusters	Clathrin coat, and Presynaptic endocytosis	0.00015	3031	3.87e-07	0.382391	CL:13770	48	11	HIP1R|AP2A2|ITSN2|AP2A1|DNM2|PICALM|NECAP2|REPS1|FCHO2|EPN1|CLINT1
STRING Clusters	Clathrin coat, and Presynaptic endocytosis	0.00042	3031	2.04e-06	0.337675	CL:13767	85	13	TPD52L2|HIP1R|AP2A2|ITSN2|AP1B1|AP2A1|DNM2|PICALM|NECAP2|REPS1|FCHO2|EPN1|CLINT1
STRING Clusters	Clathrin coat, and Presynaptic endocytosis	0.00049	3031	2.58e-06	0.33098	CL:13769	73	12	HIP1R|AP2A2|ITSN2|AP1B1|AP2A1|DNM2|PICALM|NECAP2|REPS1|FCHO2|EPN1|CLINT1
COMPARTMENTS	Clathrin vesicle coat	0.0027	3031	0.00012	0.256864	GOCC:0030125	24	6	AP2A2|AP1B1|AP2A1|NECAP2|EPN1|CLINT1
GO Cellular Component	Clathrin vesicle coat	0.0046	3031	0.00035	0.233724	GO:0030125	30	6	AP2A2|AP1B1|AP2A1|NECAP2|EPN1|CLINT1
STRING Clusters	Clathrin vesicle coat, and Eps15 homology domain	0.00075	3031	5.89e-06	0.312494	CL:13773	30	8	HIP1R|AP2A2|ITSN2|AP2A1|NECAP2|REPS1|FCHO2|EPN1
COMPARTMENTS	Clathrin-coated pit	1.33e-05	3031	3.87e-07	0.487615	GOCC:0005905	48	11	RAB35|AP2A2|ITSN2|AP2A1|DNM2|PICALM|NECAP2|REPS1|FCHO2|EPN1|FNBP1
GO Cellular Component	Clathrin-coated pit	1.43e-06	3031	5.24e-08	0.584466	GO:0005905	71	14	RAB35|HIP1R|AP2A2|ITSN2|AP2A1|DNM2|PICALM|STON1|SH3BP4|NECAP2|REPS1|FCHO2|EPN1|FNBP1
COMPARTMENTS	Clathrin-coated vesicle	0.0037	3031	0.00017	0.24318	GOCC:0030136	154	14	DVL2|RAB35|HIP1R|PIK3C2A|EGFR|AP2A2|AP1B1|AP2A1|SNX9|PICALM|NECAP2|FCHO2|EPN1|CLINT1
GO Cellular Component	Clathrin-coated vesicle	7.7e-05	3031	4.21e-06	0.411351	GO:0030136	211	20	DVL2|RAB35|HIP1R|PIK3C2A|EGFR|MYO1E|AP2A2|AP1B1|AP2A1|RAB13|DNM2|SNX9|PICALM|STON1|SH3BP4|NECAP2|FCHO2|EPN1|CLINT1|ATP6V1C1
COMPARTMENTS	Clathrin-coated vesicle membrane	0.0393	3031	0.0026	0.140561	GOCC:0030665	100	9	RAB35|HIP1R|EGFR|AP2A2|AP1B1|AP2A1|NECAP2|EPN1|CLINT1
GO Cellular Component	Clathrin-coated vesicle membrane	0.0435	3031	0.0044	0.136151	GO:0030665	130	10	RAB35|HIP1R|EGFR|AP2A2|AP1B1|AP2A1|NECAP2|EPN1|CLINT1|ATP6V1C1
GO Biological Process	Clathrin-dependent endocytosis	0.0021	3031	5.7e-05	0.267778	GO:0072583	31	7	CANX|AP2A2|ITSN2|AP2A1|PICALM|FCHO2|PIP5K1C
Reactome Pathways	Clathrin-mediated endocytosis	2.7e-12	3031	1.77e-14	1.15686	HSA-8856828	145	28	DVL2|ARPC3|HIP1R|ACTR3|PACSIN2|CBL|PIK3C2A|EGFR|ARF6|COPS2|AP2A2|HGS|SNX18|ITSN2|COPS5|AP2A1|DNM2|SNX9|PICALM|STON1|AGFG1|NECAP2|REPS1|FCHO2|EPN1|FNBP1|ACTG1|PIP5K1C
WikiPathways	Clear cell renal cell carcinoma pathways	0.0262	3031	0.0028	0.15817	WP4018	82	8	PDGFRB|PFKL|EGFR|PKM|ENO3|SLC2A1|PHGDH|ENO1
COMPARTMENTS	Cleavage furrow	0.00018	3031	6.06e-06	0.374473	GOCC:0032154	41	9	RALA|ARF6|SEPTIN6|MYLK|PKN2|RHOA|SEPTIN7|SEPTIN2|RDX
GO Cellular Component	Cleavage furrow	9.18e-05	3031	5.2e-06	0.403716	GO:0032154	52	10	RALA|ARF6|SEPTIN6|MYLK|PKN2|ITGB1|RHOA|SEPTIN7|SEPTIN2|RDX
GO Biological Process	Cleavage furrow formation	0.0438	3031	0.002	0.135853	GO:0036089	7	3	SNX18|SNX9|RHOA
Reactome Pathways	CLEC7A (Dectin-1) signaling	0.00045	3031	3.14e-05	0.334679	HSA-5607764	96	12	PSMC4|TAB1|PSMD10|PSMA2|PSMC1|PSMD11|PSMD12|CASP8|MAP3K7|CHUK|PSME1|PPP3CB
Monarch Phenotype	Cleft palate	0.0331	3031	0.00068	0.148017	HP:0000175	617	32	EFNB1|NOTCH2|MAP2K2|ARCN1|CDH11|NONO|ANK3|NRG1|INPPL1|MAP2K1|SEC23A|RPS15A|BGN|DLG1|FILIP1L|KIF14|MAP3K7|GNAI3|STXBP1|FGD1|CTNND1|PHLDB2|PPP2R5D|FLNB|DAG1|YAP1|PHGDH|CASK|RPS7|RPL11|EIF4A3|TTC37
Monarch Phenotype	Cleft soft palate	0.0177	3031	0.00029	0.175203	HP:0000185	163	14	CDH11|NONO|SEC23A|RPS15A|BGN|KIF14|MAP3K7|GNAI3|DAG1|PHGDH|RPS7|RPL11|EIF4A3|TTC37
Monarch Phenotype	CNS hypomyelination	0.0041	3031	4.65e-05	0.238722	HP:0003429	69	10	AHCY|SLC1A4|AARS1|TUBB4A|CYB5R3|STXBP1|DDOST|EIF2B1|ADSL|PHGDH
UniProt Keywords	Coated pit	9.68e-05	3031	4.47e-06	0.401412	KW-0168	51	10	RAB35|AP2A2|AP2A1|DNM2|PICALM|SH3BP4|REPS1|FCHO2|EPN1|FNBP1
COMPARTMENTS	Coated vesicle	8.67e-05	3031	2.67e-06	0.406198	GOCC:0030135	223	21	DVL2|RAB35|HIP1R|ARCN1|PDCD6|PIK3C2A|SCYL1|EGFR|SEC23A|COPG1|AP2A2|AP1B1|AP2A1|SNX9|PICALM|SEC31A|NECAP2|FCHO2|EPN1|CLINT1|COPE
GO Cellular Component	Coated vesicle	7.82e-06	3031	3.59e-07	0.510679	GO:0030135	307	27	DVL2|RAB35|HIP1R|ARCN1|PDCD6|PIK3C2A|SCYL1|EGFR|MYO1E|SEC23A|COPG1|AP2A2|AP1B1|AP2A1|RAB13|DNM2|SNX9|PICALM|SEC31A|STON1|SH3BP4|NECAP2|FCHO2|EPN1|CLINT1|ATP6V1C1|COPE
COMPARTMENTS	Coated vesicle membrane	0.00033	3031	1.16e-05	0.348149	GOCC:0030662	152	16	RAB35|HIP1R|ARCN1|PDCD6|SCYL1|EGFR|SEC23A|COPG1|AP2A2|AP1B1|AP2A1|SEC31A|NECAP2|EPN1|CLINT1|COPE
GO Cellular Component	Coated vesicle membrane	0.00081	3031	5.15e-05	0.309151	GO:0030662	193	17	RAB35|HIP1R|ARCN1|PDCD6|SCYL1|EGFR|SEC23A|COPG1|AP2A2|AP1B1|AP2A1|SEC31A|NECAP2|EPN1|CLINT1|ATP6V1C1|COPE
InterPro Domains	Coatomer/calthrin adaptor appendage, C-terminal subdomain	0.0142	3031	9.26e-05	0.184771	IPR009028	6	4	COPG1|AP2A2|AP1B1|AP2A1
Monarch Phenotype	Cognitive impairment	0.0039	3031	4.15e-05	0.240894	HP:0100543	1903	82	EFNB1|SNAP29|AHCY|RP2|AIMP2|GALK1|SLC1A4|PMPCB|NECTIN2|PI4KA|MPP5|TAOK1|AARS1|PDGFRB|SLC12A2|MAP2K2|ARCN1|TUBB4A|ACAT1|CDH11|CDH2|SCYL1|NONO|ANK3|QDPR|GNAQ|CSTB|HPRT1|DIP2B|MAP2K1|YWHAG|MMP14|VPS37A|FMN2|MPDZ|TUBB3|PPP2R1A|FTSJ1|EPB41L1|EZR|ACSL4|PARK7|PSMD12|AP1B1|ANKLE2|GMPPA|LONP1|CYB5R3|KIF14|MAP3K7|NRAS|NSDHL|STXBP1|PALM2AKAP2|FGD1|NHS|SBF1|WASF1|FAT4|TKT|GDI1|RAB3GAP1|RPL10|EIF2B1|SLC2A1|GP…
TISSUES	Colonic adenocarcinoma cell	0.00019	3031	6.01e-06	0.372125	BTO:0000032	80	12	PYGB|ADGRE5|RPS15A|ANXA2|ANXA7|ITPA|ASMTL|DDOST|MYO10|RAN|RPL9|CTNNB1
TISSUES	Colonic cancer cell	2.33e-06	3031	6.53e-08	0.563264	BTO:0000586	280	27	PYGB|AHCY|ADGRE5|MAP2K2|CUL3|IQGAP1|NONO|RPIA|AXL|CTNNA1|RPS15A|PKM|LASP1|HNRNPM|ANXA2|TAGLN2|ANXA7|ITPA|ASMTL|TAGLN|DDOST|MYO10|RAN|RPL9|CTNNB1|ENO1|JAK1
KEGG Pathways	Colorectal cancer	0.004	3031	0.00072	0.239794	hsa05210	82	9	RALA|MAP2K2|RALB|EGFR|BAX|MAP2K1|NRAS|RHOA|CTNNB1
Monarch Phenotype	Complete blood cell count	2.59e-07	3031	8.49e-11	0.65867	EFO:0004586	2849	136	BAIAP2L1|CSK|EHD4|CDC37|SNX8|SERPINE1|ACTA2|GALK1|SLC25A11|CD82|EXOC2|ADGRE5|TRAP1|CANX|NECTIN2|PI4KA|NOTCH2|BCAR3|TAOK1|PDGFRB|SLC12A2|RAB2A|MAP2K2|PACSIN2|ARCN1|CBL|FARP2|RAB7A|TNPO3|PIK3C2A|PXN|IQGAP1|RALB|EGFR|NRG1|ATP5MF|BAX|RPN1|ERAP1|RAPGEF6|STAT6|CRK|AXL|DIP2B|BCR|ABR|CSPG4|GNAI2|PFAS|PAK2|CPNE1|MET|FMN2|NQO1|FARSA|TUFM|PDIA5|RIC8A|RASA3|PLCB1|MAP4K4|CTSB|ITSN2|MINK1|PLS3|ATP2B4|ANKLE2|TP…
Monarch Phenotype	Congenital abnormal hair pattern	0.0016	3031	1.15e-05	0.279588	HP:0011361	247	21	EFNB1|RRAS2|NOTCH2|MPP5|SLC12A2|MAP2K2|CBL|PIK3C2A|CDH2|VPS51|MAP2K1|RPS15A|PPP2R1A|PSMD12|MAP3K7|NRAS|FGD1|RAB3GAP1|ACTG1|RPS7|RPL11
TISSUES	Connective tissue	4.45e-17	3031	5.5e-19	1.63516	BTO:0000421	954	82	RIPK2|PSMA2|SNX17|ADGRE5|CANX|RRAS2|CCT7|COTL1|ACTR3|EHD2|EHBP1|ACAT1|CCT6A|DOCK11|CCT5|AKR1B1|ANXA5|ERAP1|AXL|ABR|YWHAG|RAB1B|ITGA3|TCP1|PKM|TUBB3|TUFM|PPP2R1A|BGN|PARK7|RPS2|FERMT2|DPYSL3|CTSB|ANXA2|RPS3A|TPM1|PCBP2|CALD1|VTA1|TIPRL|ARHGAP18|STK4|ANXA7|YARS1|ITPA|SDC1|IL6ST|FSCN1|PSME1|XRCC5|TAGLN|TAGLN3|RPL34|ITGB1|SH3BP4|ATP2B1|GDI1|DDOST|RHOA|SHC1|RPL6|MPST|SLC2A1|CFL1|SERPINH1|TXNRD1|RPS13|…
Reactome Pathways	Constitutive Signaling by EGFRvIII	0.00023	3031	1.35e-05	0.363827	HSA-5637810	15	6	CDC37|PLCG1|CBL|EGFR|NRAS|SHC1
Reactome Pathways	Constitutive Signaling by Ligand-Responsive EGFR Cancer Variants	0.00057	3031	4.03e-05	0.324413	HSA-1236382	19	6	CDC37|PLCG1|CBL|EGFR|NRAS|SHC1
Reactome Pathways	Constitutive Signaling by Overexpressed ERBB2	0.0053	3031	0.00054	0.227572	HSA-9634285	11	4	CDC37|NRAS|SHC1|ERBIN
GO Cellular Component	Contractile fiber	6.37e-06	3031	2.9e-07	0.519586	GO:0043292	246	24	ACTA2|SRI|ANK3|NEXN|FERMT2|PDLIM7|ATP2B4|TPM1|MYPN|CALD1|GLRX3|PDLIM1|AHNAK|PPP3CB|ILK|PPP1R12A|CORO1C|SLC2A1|FLNB|DAG1|ACTG1|CTNNB1|ENO1|TPM2
Reactome Pathways	Cooperation of PDCL (PhLP1) and TRiC/CCT in G-protein beta folding	0.009	3031	0.001	0.204576	HSA-6814122	38	6	CCT7|CCT6A|CCT5|GNAQ|TCP1|CCT4
COMPARTMENTS	COPI vesicle coat	0.0161	3031	0.0009	0.179317	GOCC:0030126	13	4	ARCN1|SCYL1|COPG1|COPE
GO Cellular Component	COPI vesicle coat	0.011	3031	0.0009	0.195861	GO:0030126	13	4	ARCN1|SCYL1|COPG1|COPE
Reactome Pathways	COPI-dependent Golgi-to-ER retrograde traffic	4.45e-05	3031	1.91e-06	0.435164	HSA-6811434	99	14	ARF5|ARF3|NAPA|ARCN1|TUBB4A|RAB1B|TUBB6|TUBB3|NAPG|COPG1|TUBB4B|RAB1A|TUBA1C|COPE
Reactome Pathways	COPI-independent Golgi-to-ER retrograde traffic	0.0286	3031	0.0044	0.154363	HSA-6811436	52	6	TUBB4A|TUBB6|TUBB3|TUBB4B|RAB3GAP1|TUBA1C
Reactome Pathways	COPI-mediated anterograde transport	2.98e-06	3031	8.87e-08	0.552578	HSA-6807878	101	16	ARF5|YKT6|ARF3|NAPA|ARCN1|TUBB4A|ANK3|RAB1B|TUBB6|TUBB3|NAPG|COPG1|TUBB4B|RAB1A|TUBA1C|COPE
Reactome Pathways	COPII-mediated vesicle transport	0.0257	3031	0.0038	0.159007	HSA-204005	68	7	YKT6|NAPA|SEC23A|RAB1B|NAPG|SEC31A|RAB1A
COMPARTMENTS	Cortical actin cytoskeleton	0.001	3031	4.21e-05	0.3	GOCC:0030864	54	9	ANK3|LLGL1|LASP1|PLS1|UTRN|EPB41L2|RHOA|SLC2A1|RDX
GO Cellular Component	Cortical actin cytoskeleton	1.79e-06	3031	7.1e-08	0.574715	GO:0030864	73	14	COTL1|IQGAP1|MYO1E|LLGL1|LASP1|PLS1|MTSS2|CALD1|UTRN|EPB41L2|SNX9|SLC2A1|PPP1R9B|RDX
GO Biological Process	Cortical actin cytoskeleton organization	7.8e-07	3031	9e-09	0.610791	GO:0030866	40	12	EHD2|ARF6|LLGL1|FMNL3|PLS1|EPB41L1|EZR|DLG1|NCKAP1|EPB41L2|RAB13|CDK5
COMPARTMENTS	Cortical cytoskeleton	0.00071	3031	2.73e-05	0.314874	GOCC:0030863	79	11	ANK3|LLGL1|LASP1|PLS1|EZR|UTRN|EPB41L2|MAPRE1|RHOA|SLC2A1|RDX
GO Cellular Component	Cortical cytoskeleton	5.44e-07	3031	1.81e-08	0.62644	GO:0030863	102	17	COTL1|IQGAP1|MYO1E|LLGL1|LASP1|PLS1|EZR|MTSS2|CALD1|UTRN|EPB41L2|MPP1|MAPRE1|SNX9|SLC2A1|PPP1R9B|RDX
GO Biological Process	Cortical cytoskeleton organization	5.93e-06	3031	8.39e-08	0.522695	GO:0030865	62	13	EHD2|ARF6|LLGL1|FMNL3|PLS1|EPB41L1|EZR|DLG1|NCKAP1|EPB41L2|RAB13|RHOA|CDK5
Reactome Pathways	Costimulation by the CD28 family	0.0228	3031	0.0033	0.164207	HSA-388841	66	7	CSK|PAK2|PPP2R1A|FYN|PPP2R5D|YES1|CDC42
Reactome Pathways	CRMPs in Sema3A signaling	0.0022	3031	0.00019	0.265758	HSA-399956	16	5	NRP1|DPYSL3|FYN|PLXNA1|CDK5
Reactome Pathways	Cross-presentation of soluble exogenous antigens (endosomes)	0.0065	3031	0.00069	0.218709	HSA-1236978	49	7	PSMC4|PSMD10|PSMA2|PSMC1|PSMD11|PSMD12|PSME1
Monarch Phenotype	Cryptorchidism	0.0345	3031	0.00072	0.146218	HP:0000028	619	32	EFNB1|ACTA2|RRAS2|NOTCH2|MPP5|SLC12A2|MAP2K2|CBL|PIK3C2A|CDH11|CDH2|NONO|INPPL1|MAP2K1|SEC23A|PSMD12|ANKLE2|MYLK|LONP1|MAP3K7|NRAS|FGD1|DNM2|FAT4|PPP1R12A|RAB3GAP1|RPL10|FLNB|DAG1|PHGDH|TPM2|CDC42
Reactome Pathways	CTLA4 inhibitory signaling	0.0267	3031	0.0041	0.157349	HSA-389513	21	4	PPP2R1A|FYN|PPP2R5D|YES1
Monarch Phenotype	Cup-to-disc ratio measurement	0.0345	3031	0.00072	0.146218	EFO:0006939	65	8	EXOC2|PKN2|MAPRE1|FAT4|FLNB|AMOTL2|BCAS3|HSPA12A
KEGG Pathways	Cushing syndrome	0.0169	3031	0.0046	0.177211	hsa04934	153	11	DVL2|MAP2K2|EGFR|GNAQ|MAP2K1|GNAI2|PLCB1|RAP1A|GNAI3|PLCB3|CTNNB1
KEGG Pathways	Cysteine and methionine metabolism	0.0106	3031	0.0025	0.197469	hsa00270	46	6	MRI1|AHCY|SRM|MPST|PHGDH|MTAP
Reactome Pathways	Cytokine Signaling in Immune system	4.89e-06	3031	1.61e-07	0.531069	HSA-1280215	706	46	RALA|PSMC4|TAB1|PSMD10|CSK|RIPK2|PSMA2|PLCG1|CANX|PSMC1|PSMD11|CBL|UBE2L6|INPPL1|STAT6|CRK|MAP2K1|PAK2|TCP1|PPP2R1A|EIF4A2|ANXA2|FYN|PSMD12|CASP8|MSN|PTPN14|MAP3K7|NRAS|CHUK|TRIM5|SDC1|IL6ST|FSCN1|PSME1|ITGB1|SHC1|PPP2R5D|FLNB|CFL1|CNN2|YES1|MTAP|EIF4A3|CDC42|JAK1
GO Biological Process	Cytokinesis	5.5e-06	3031	7.72e-08	0.525964	GO:0000910	114	17	RAB35|EXOC2|EXOC4|ACTR3|RASA1|ANK3|FMN2|EXOC7|SEPTIN6|SNX18|SEPTIN8|SNX9|ANXA11|RHOA|SEPTIN7|CFL1|SEPTIN2
COMPARTMENTS	Cytoplasm	1.81e-69	3031	1.58e-72	6.87423	GOCC:0005737	8195	432	RALA|BAIAP2L1|DVL2|RANBP9|MRI1|PSMC4|YTHDC2|SNAP29|TAB1|PYGB|TPD52L2|AHCY|PSMD10|RP2|CSK|EHD4|RIPK2|TBC1D17|CDC37|NAMPT|SNX8|AIMP2|SERPINE1|PSMA2|YKT6|SEC61B|AK1|ACTA2|RPL19|GALK1|SLC25A11|LRRC59|ARPC3|RAB35|EXOC2|SNX17|DOK1|PLCG1|VASP|TRAP1|CANX|CDC42EP1|PMPCB|SNAP23|TSG101|HIP1R|EXOC4|WDR44|LGALS3|EFR3A|PI4KA|RRAS2|CCNB1|ARF3|CCT7|TBRG4|ITGAV|PSMC1|IPO5|MPP5|PSMD11|ANKRD13A|AARS1|PDGFRB|HACD3|S…
GO Cellular Component	Cytoplasm	2.39e-58	3031	8.17e-61	5.76216	GO:0005737	12056	499	ARF5|RALA|BAIAP2L1|DVL2|RANBP9|MRI1|PSMC4|YTHDC2|EFNB1|SNAP29|TAB1|PYGB|TPD52L2|AHCY|PSMD10|RP2|CSK|EHD4|RIPK2|TBC1D17|CDC37|NAMPT|SNX8|AIMP2|SERPINE1|PSMA2|YKT6|SEC61B|AK1|ACTA2|RPL19|GALK1|SLC25A11|LRRC59|ARPC3|RAB35|EXOC2|SNX17|DOK1|SLC1A4|DDX39A|ADGRE5|PLCG1|VASP|TRAP1|CANX|CDC42EP1|PMPCB|SNAP23|TSG101|NUMBL|HIP1R|GRWD1|EXOC4|WDR44|LGALS3|EFR3A|PI4KA|RRAS2|CCNB1|NOTCH2|ARF3|PRPH|CCT7|TBRG4|BC…
UniProt Keywords	Cytoplasm	1.54e-53	3031	6.88e-56	5.28125	KW-0963	5095	316	ARF5|BAIAP2L1|DVL2|RANBP9|MRI1|PSMC4|YTHDC2|SNAP29|AHCY|PSMD10|CSK|RIPK2|CDC37|NAMPT|AIMP2|PSMA2|YKT6|AK1|ACTA2|ARPC3|SNX17|DOK1|DDX39A|VASP|CDC42EP1|TSG101|NUMBL|HIP1R|WDR44|LGALS3|EFR3A|PI4KA|CCNB1|NOTCH2|ARF3|CCT7|BCAR3|PSMC1|IPO5|PSMD11|TAOK1|AARS1|COTL1|SMURF2|AJUBA|MAP2K2|ACTR3|PACSIN2|EHD2|PPP1R12C|EHBP1|ARCN1|CBL|TUBB4A|CUL3|RAPGEF2|RAB10|PDCD6|NRP1|TNPO3|PRKAR2A|SRI|PIK3C2A|IDE|PXN|IQGAP…
STRING Clusters	Cytoplasmic ribosomal proteins	0.00054	3031	3.06e-06	0.326761	CL:165	61	11	RPL19|RPS15A|RPS2|RPLP1|RPL34|RPL6|RPL10|RPS13|RPL9|RPS7|RPS27
STRING Clusters	Cytoplasmic ribosomal proteins	0.0031	3031	3.69e-05	0.250864	CL:166	53	9	RPL19|RPS2|RPLP1|RPL34|RPL10|RPS13|RPL9|RPS7|RPS27
STRING Clusters	Cytoplasmic ribosomal proteins	0.0475	3031	0.0013	0.132331	CL:168	40	6	RPS2|RPL34|RPL10|RPS13|RPL9|RPS27
WikiPathways	Cytoplasmic ribosomal proteins	9.36e-05	3031	2.88e-06	0.402872	WP477	88	13	RPL19|RPS15A|RPS2|RPLP1|RPS3A|RPL34|RPL6|RPL10|RPS13|RPL9|RPS7|RPL11|RPS27
COMPARTMENTS	Cytoplasmic side of plasma membrane	9.97e-06	3031	2.82e-07	0.50013	GOCC:0009898	111	16	MAP2K2|IQGAP1|GNAQ|CYTH3|GNAI2|RASA3|EZR|SNX18|FERMT2|DLG1|GNAI3|PKP4|SNX9|RHOA|PPP1R9B|FARP1
GO Cellular Component	Cytoplasmic side of plasma membrane	2.57e-08	3031	6.77e-10	0.759007	GO:0009898	174	24	MAP2K2|IQGAP1|GNAQ|CYTH3|GNAI2|AP2A2|RASA3|EZR|MTSS2|PTK2|SNX18|FERMT2|DLG1|FYN|AP2A1|GNAI3|CHUK|PKP4|SNX9|ATP2B1|RHOA|YES1|PPP1R9B|FARP1
GO Biological Process	Cytoplasmic translation	5.44e-05	3031	9.72e-07	0.42644	GO:0002181	123	16	RPL19|RPS15A|EIF4A2|FTSJ1|RPS2|RPLP1|RPS3A|EIF2S2|RPL34|RPL6|RPL10|RPS13|RPL9|RPS7|RPL11|RPS27
COMPARTMENTS	Cytoplasmic vesicle	1.94e-17	3031	1.77e-19	1.67122	GOCC:0031410	1738	118	RALA|DVL2|SNAP29|TAB1|PYGB|EHD4|TBC1D17|SNX8|SERPINE1|PSMA2|YKT6|RAB35|SNX17|SNAP23|TSG101|HIP1R|WDR44|LGALS3|PI4KA|ITGAV|PSMD11|ANKRD13A|SNX1|COTL1|MAP2K2|PACSIN2|EHD2|ARCN1|RAPGEF2|RAB10|PDCD6|RAB7A|NRP1|PIK3C2A|VPS37B|PFKL|SCYL1|ARL8A|EGFR|VPS51|ZDHHC5|CSTB|ITGB5|RPN1|RAPGEF6|ARF6|MAP2K1|SEC23A|MMP14|RAB1B|ARHGAP1|CPNE1|VPS37A|RAP2B|PKM|LLGL1|COPG1|BGN|AP2A2|HGS|RAB12|RAB11B|EZR|TUBB4B|SNX18|C…
GO Cellular Component	Cytoplasmic vesicle	4.19e-25	3031	4.29e-27	2.43778	GO:0031410	2482	165	RALA|DVL2|SNAP29|TAB1|PYGB|AHCY|RP2|EHD4|TBC1D17|SNX8|SERPINE1|PSMA2|YKT6|RAB35|SNX17|SLC1A4|ADGRE5|CANX|SNAP23|TSG101|HIP1R|WDR44|LGALS3|PI4KA|ITGAV|PSMD11|ANKRD13A|PDGFRB|SNX1|COTL1|SLC12A2|RAB2A|MAP2K2|PACSIN2|EHD2|EHBP1|ARCN1|RAPGEF2|RAB10|PDCD6|RAB7A|NRP1|PIK3C2A|VPS37B|IQGAP1|PFKL|SCYL1|ARL8A|EGFR|VPS51|ZDHHC5|MYO1E|CSTB|ITGA5|ITGB5|RPN1|RAPGEF6|ARF6|MAP2K1|CTNNA1|SEC23A|MMP14|RAB1B|ARHGAP1…
UniProt Keywords	Cytoplasmic vesicle	1.26e-05	3031	5.06e-07	0.489963	KW-0968	595	40	DVL2|SNAP29|TBC1D17|YKT6|RAB35|SNX17|HIP1R|PDGFRB|PACSIN2|ARCN1|RAB10|PDCD6|RAB7A|PIK3C2A|MYO1E|SEC23A|FMN2|COPG1|RAB12|RAB11B|SNX18|AP1B1|COPS5|RAB13|CLIC4|SEPTIN8|OPTN|DNM2|SNX9|PICALM|SEC31A|SH3BP4|AGFG1|NECAP2|TBC1D5|FNBP1|CLINT1|C2CD5|COPE|SH3GLB1
COMPARTMENTS	Cytoplasmic vesicle membrane	3.83e-11	3031	5.99e-13	1.04168	GOCC:0030659	723	59	RALA|SNAP29|EHD4|SNX8|YKT6|RAB35|SNX17|SNAP23|TSG101|HIP1R|WDR44|LGALS3|ITGAV|SNX1|PACSIN2|EHD2|ARCN1|RAB10|PDCD6|RAB7A|VPS37B|SCYL1|ARL8A|EGFR|ARF6|SEC23A|CPNE1|VPS37A|RAP2B|COPG1|AP2A2|ANXA2|AP1B1|AP2A1|MAP3K7|NRAS|RAP1A|OPTN|SNX2|DNM2|SNX9|SEC31A|ITGB1|RAB1A|NECAP2|ATP2B1|CORO1C|DDOST|RHOA|TBC1D5|EPN1|CLINT1|C2CD5|PIP5K1C|COPE|SIRPA|EHD1|SERPINB6|UBAP1
GO Cellular Component	Cytoplasmic vesicle membrane	6.23e-11	3031	1.4e-12	1.02055	GO:0030659	1190	79	RALA|SNAP29|TAB1|EHD4|SNX8|YKT6|RAB35|SNX17|ADGRE5|SNAP23|TSG101|HIP1R|WDR44|LGALS3|PI4KA|ITGAV|SNX1|SLC12A2|PACSIN2|EHD2|ARCN1|RAB10|PDCD6|RAB7A|VPS37B|IQGAP1|SCYL1|ARL8A|EGFR|ARF6|SEC23A|ARHGAP1|CPNE1|VPS37A|FMN2|RAP2B|LLGL1|COPG1|AP2A2|HGS|RAB12|ATP11C|RAB11B|SNX18|ANXA2|AP1B1|AP2A1|VTA1|RAB13|MAP3K7|NRAS|RAP1A|CLIC4|SEPTIN8|OPTN|SNX2|DNM2|SNX9|SEC31A|ITGB1|RAB1A|NECAP2|ATP2B1|CORO1C|DDOST|RHO…
GO Molecular Function	Cytoskeletal protein binding	2.26e-23	3031	5.49e-26	2.26459	GO:0008092	1002	97	RALA|BAIAP2L1|ARPC3|VASP|CNN1|HIP1R|TAOK1|COTL1|AJUBA|ACTR3|PACSIN2|FARP2|RAB10|PXN|IQGAP1|ARL8A|EGFR|CCT5|ANK3|MYO1E|INPPL1|CRK|AXL|DIP2B|CTNNA1|FMN2|CTNNAL1|LLGL1|LASP1|RAB11B|NEXN|FMNL3|PLS1|EPB41L1|EZR|MTSS2|PTK2|FERMT2|MAP4K4|DPYSL3|DLG1|ANXA2|FYN|PDLIM7|PLS3|GMFB|TPM1|MYPN|KIRREL1|MSN|MYLK|IQGAP3|CALD1|AFDN|KIF14|UTRN|EPB41L2|CNN3|PDLIM1|DLG5|NEK6|PHACTR4|MAPRE1|ABI1|FSCN1|DNM2|WASF1|TAGLN|…
COMPARTMENTS	Cytoskeleton	5.56e-21	3031	3.14e-23	2.02549	GOCC:0005856	1575	119	RANBP9|SNAP29|PSMD10|RP2|RIPK2|AK1|ACTA2|ARPC3|SLC1A4|VASP|CNN1|CCNB1|PRPH|CCT7|AJUBA|MAP2K2|ACTR3|EHBP1|TUBB4A|CUL3|PRKAR2A|PXN|IQGAP1|CDH2|SCYL1|ARL8A|CCT6A|CCT5|ANK3|FLCN|MYO1E|AXL|CTNNA1|MMP14|GNAI2|TCP1|VPS37A|TUBB6|NUDC|TUBB3|LLGL1|PPP2R1A|LASP1|NEXN|EXOC7|PLS1|EPB41L1|EZR|PTK2|TUBB4B|SEPTIN6|DPYSL3|DLG1|ATG7|PDLIM7|PLS3|TPM1|CASP8|MSN|MYLK|NCKAP1|CALD1|CDC42BPA|KIF14|UTRN|EPB41L2|ARHGAP18|…
GO Cellular Component	Cytoskeleton	8.81e-27	3031	8.61e-29	2.6055	GO:0005856	2369	164	BAIAP2L1|RANBP9|SNAP29|PSMD10|RP2|RIPK2|AK1|ACTA2|ARPC3|SLC1A4|VASP|CDC42EP1|TSG101|CNN1|HIP1R|CCNB1|PRPH|CCT7|TAOK1|COTL1|AJUBA|MAP2K2|ACTR3|PACSIN2|EHD2|PPP1R12C|EHBP1|FARP2|TUBB4A|CUL3|RAB10|NRP1|PRKAR2A|PXN|IQGAP1|SCYL1|ARL8A|CCT6A|CCT5|ANK3|FLCN|MYO1E|ABI2|RAPGEF6|INPPL1|CRK|AXL|MAP2K1|CTNNA1|MMP14|GNAI2|DNMBP|TCP1|VPS37A|TUBB6|FMN2|BASP1|NUDC|TUBB3|CTNNAL1|LLGL1|PPP2R1A|LASP1|NEXN|EXOC7|PLS…
UniProt Keywords	Cytoskeleton	2.6e-20	3031	1.94e-22	1.9585	KW-0206	1235	102	BAIAP2L1|ACTA2|ARPC3|VASP|CDC42EP1|TSG101|CCNB1|COTL1|AJUBA|ACTR3|PACSIN2|PPP1R12C|TUBB4A|CUL3|RAB10|PXN|SCYL1|ARL8A|CCT5|ANK3|MYO1E|ABI2|INPPL1|MAP2K1|CTNNA1|GNAI2|DNMBP|TCP1|TUBB6|FMN2|NUDC|TUBB3|CTNNAL1|LLGL1|LASP1|NEXN|EPB41L1|EZR|PTK2|TUBB4B|SEPTIN6|FERMT2|PDLIM7|TPM1|MSN|MYLK|CALD1|PTPN14|KIF14|UTRN|EPB41L2|GNAI3|PKN2|PDLIM1|DLG5|NEK6|CLIC4|PARD3|FGD1|MAPRE1|ABI1|SEPTIN8|FSCN1|DNM2|PKP4|WAS…
GO Biological Process	Cytoskeleton organization	5.05e-21	3031	3.54e-24	2.02967	GO:0007010	1229	105	RALA|BAIAP2L1|RANBP9|ARPC3|VASP|CNN1|NECTIN2|HIP1R|CCNB1|PRPH|TAOK1|PDGFRB|AJUBA|ACTR3|PACSIN2|EHD2|EHBP1|FARP2|TUBB4A|CUL3|NRP1|ANK3|MYO1E|ABI2|ITGB5|DNAAF5|INPPL1|ARF6|CRK|BCR|CTNNA1|TUBB6|FMN2|NUDC|TUBB3|LLGL1|PPP2R1A|FMNL3|PLS1|EPB41L1|EZR|RAP1GDS1|TUBB4B|DPYSL3|FRMD6|DLG1|ARHGAP12|MINK1|PDLIM7|PLS3|TPM1|MYPN|MSN|NCKAP1|CALD1|CDC42BPA|UTRN|EPB41L2|RAB13|SLK|CNN3|PDLIM1|AMOT|NEK6|PHACTR4|PARD3…
GO Biological Process	Cytoskeleton-dependent cytokinesis	1.96e-05	3031	3.14e-07	0.470774	GO:0061640	112	16	RAB35|EXOC2|EXOC4|ACTR3|RASA1|ANK3|FMN2|EXOC7|SEPTIN6|SNX18|SEPTIN8|SNX9|RHOA|SEPTIN7|CFL1|SEPTIN2
COMPARTMENTS	Cytosol	2.04e-80	3031	8.86e-84	7.96904	GOCC:0005829	3054	282	BAIAP2L1|DVL2|RANBP9|MRI1|PSMC4|SNAP29|TAB1|AHCY|PSMD10|CSK|RIPK2|TBC1D17|CDC37|NAMPT|AIMP2|PSMA2|YKT6|AK1|ACTA2|RPL19|ARPC3|RAB35|EXOC2|SNX17|DOK1|PLCG1|VASP|CDC42EP1|TSG101|HIP1R|WDR44|LGALS3|CCNB1|CCT7|ITGAV|PSMC1|PSMD11|AARS1|COTL1|RAB2A|AJUBA|MAP2K2|ACTR3|PACSIN2|EHD2|NAPA|EHBP1|ARCN1|CBL|FARP2|TUBB4A|CUL3|RAPGEF2|RAB10|RAB7A|PRKAR2A|SRI|PIK3C2A|IDE|PXN|IQGAP1|PFKL|SCYL1|PGD|RASA1|CCT6A|DOCK…
GO Cellular Component	Cytosol	3.71e-70	3031	1.81e-73	6.94306	GO:0005829	5438	355	BAIAP2L1|DVL2|RANBP9|MRI1|PSMC4|SNAP29|TAB1|AHCY|PSMD10|CSK|RIPK2|TBC1D17|CDC37|NAMPT|SNX8|AIMP2|PSMA2|YKT6|SEC61B|AK1|ACTA2|RPL19|GALK1|ARPC3|RAB35|EXOC2|SNX17|DOK1|PLCG1|VASP|CDC42EP1|TSG101|HIP1R|GRWD1|EXOC4|WDR44|LGALS3|EFR3A|PI4KA|CCNB1|CCT7|ITGAV|PSMC1|PSMD11|TAOK1|AARS1|SNX1|COTL1|SMURF2|SLC12A2|RAB2A|AJUBA|MAP2K2|ACTR3|PACSIN2|EHD2|NAPA|EHBP1|ARCN1|CBL|FARP2|TUBB4A|CUL3|RAPGEF2|RAB10|PDCD…
GO Cellular Component	Cytosolic large ribosomal subunit	0.0157	3031	0.0014	0.18041	GO:0022625	56	7	RPL19|RPLP1|RPL34|RPL6|RPL10|RPL9|RPL11
COMPARTMENTS	Cytosolic ribosome	0.0001	3031	3.22e-06	0.4	GOCC:0022626	89	13	RPL19|RPS15A|RPS2|RPLP1|RPS3A|RPL34|RPL6|RPL10|RPS13|RPL9|RPS7|RPL11|RPS27
GO Cellular Component	Cytosolic ribosome	4.47e-05	3031	2.36e-06	0.434969	GO:0022626	101	14	RPL19|RPS15A|RPS2|RPLP1|RPS3A|RPL34|RPL6|RPL10|RPS13|RPS4Y2|RPL9|RPS7|RPL11|RPS27
COMPARTMENTS	Cytosolic small ribosomal subunit	0.0147	3031	0.00081	0.183268	GOCC:0022627	36	6	RPS15A|RPS2|RPS3A|RPS13|RPS7|RPS27
GO Cellular Component	Cytosolic small ribosomal subunit	0.005	3031	0.00039	0.230103	GO:0022627	44	7	RPS15A|RPS2|RPS3A|RPS13|RPS4Y2|RPS7|RPS27
Reactome Pathways	Cytosolic tRNA aminoacylation	0.008	3031	0.00093	0.209691	HSA-379716	24	5	AIMP2|AARS1|FARSA|YARS1|GARS1
Reactome Pathways	DARPP-32 events	0.008	3031	0.00093	0.209691	HSA-180024	24	5	PRKAR2A|PPP2R1A|PPP3CB|PPP2R5D|CDK5
GO Biological Process	De novo IMP biosynthetic process	0.0337	3031	0.0014	0.147237	GO:0006189	6	3	PFAS|GART|ADSL
GO Biological Process	De novo XMP biosynthetic process	0.0438	3031	0.002	0.135853	GO:0097294	7	3	PFAS|GART|ADSL
Monarch Phenotype	Decreased body weight	0.003	3031	2.74e-05	0.252288	HP:0004325	1274	61	SNAP29|AHCY|GALK1|SLC25A11|PMPCB|NOTCH2|MPP5|AARS1|SLC12A2|MAP2K2|ARCN1|CBL|TUBB4A|ACAT1|PIK3C2A|NONO|VPS51|MAP2K1|YWHAG|ACAD9|MET|VPS37A|RPS15A|TUBB3|FTSJ1|ACSL4|PSMD12|AP1B1|ANKLE2|CASP8|MYPN|LONP1|CYB5R3|NHLRC2|MAP3K7|RARS2|NSDHL|DPM1|STXBP1|FGD1|DNM2|GIPC1|ASNS|ARPC1B|GDI1|DDOST|RAB3GAP1|SLC2A1|TJP2|ITGA7|ACTG1|PHGDH|CASK|RPS7|CTNNB1|RPL11|TPM2|CDC42|TTC37|AMPD2|JAK1
Monarch Phenotype	Decreased head circumference	2.55e-05	3031	4.75e-08	0.459346	HP:0040195	1088	63	EFNB1|SNAP29|AHCY|AIMP2|GALK1|SLC1A4|PMPCB|PI4KA|MPP5|TAOK1|AARS1|PDGFRB|SLC12A2|ARCN1|TUBB4A|CDH11|VPS51|QDPR|YWHAG|ITGA3|VPS37A|RPS15A|FMN2|UGDH|TUBB3|TUFM|PPP2R1A|RAB11B|EXOC7|EPB41L1|EZR|ACSL4|PSMD12|ANKLE2|GMPPA|LONP1|CYB5R3|KIF14|RARS2|NSDHL|CHUK|DPM1|STXBP1|ITPA|SBF1|ASNS|FAT4|PPP1R12A|RAB3GAP1|RPL10|EIF2B1|SLC2A1|DAG1|ACTG1|COASY|ADSL|PHGDH|CASK|RPS7|CTNNB1|RPL11|CDC42|AMPD2
Reactome Pathways	Dectin-1 mediated noncanonical NF-kB signaling	0.0041	3031	0.0004	0.238722	HSA-5607761	59	8	PSMC4|PSMD10|PSMA2|PSMC1|PSMD11|PSMD12|CHUK|PSME1
Reactome Pathways	Defective CFTR causes cystic fibrosis	0.0149	3031	0.002	0.182681	HSA-5678895	60	7	PSMC4|PSMD10|PSMA2|PSMC1|PSMD11|PSMD12|PSME1
Reactome Pathways	Degradation of AXIN	0.0027	3031	0.00023	0.256864	HSA-4641257	54	8	PSMC4|PSMD10|PSMA2|PSMC1|PSMD11|SMURF2|PSMD12|PSME1
Reactome Pathways	Degradation of beta-catenin by the destruction complex	0.0021	3031	0.00017	0.267778	HSA-195253	82	10	PSMC4|PSMD10|PSMA2|PSMC1|PSMD11|PPP2R1A|PSMD12|PSME1|PPP2R5D|CTNNB1
Reactome Pathways	Degradation of DVL	0.00074	3031	5.42e-05	0.313077	HSA-4641258	56	9	DVL2|PSMC4|PSMD10|PSMA2|PSMC1|PSMD11|CUL3|PSMD12|PSME1
Reactome Pathways	Degradation of GLI1 by the proteasome	0.014	3031	0.0018	0.185387	HSA-5610780	59	7	PSMC4|PSMD10|PSMA2|PSMC1|PSMD11|PSMD12|PSME1
Reactome Pathways	Degradation of GLI2 by the proteasome	0.014	3031	0.0018	0.185387	HSA-5610783	59	7	PSMC4|PSMD10|PSMA2|PSMC1|PSMD11|PSMD12|PSME1
Monarch Phenotype	Delayed ability to sit	0.0156	3031	0.00025	0.180688	HP:0025336	28	6	VPS51|UGDH|TUBB3|WASF1|RAB3GAP1|DAG1
Monarch Phenotype	Delayed gross motor development	0.006	3031	7.72e-05	0.222185	HP:0002194	284	21	MPP5|SLC12A2|TNPO3|CDH2|NONO|VPS51|UGDH|TUBB3|PPP2R1A|FTSJ1|RAB11B|PSMD12|KIF14|STXBP1|DNM2|GARS1|WASF1|RAB3GAP1|PPP2R5D|DAG1|AMPD2
Monarch Phenotype	Delayed speech and language development	0.0152	3031	0.00024	0.181816	HP:0000750	790	40	AIMP2|SLC1A4|PMPCB|PI4KA|MPP5|AARS1|SLC12A2|MAP2K2|CBL|TUBB4A|NONO|ANK3|DNAAF5|YWHAG|SEC23A|VPS37A|FMN2|TUBB3|PPP2R1A|FTSJ1|RAB11B|EZR|ACSL4|PSMD12|NRAS|RARS2|NSDHL|STXBP1|WASF1|TPRN|TKT|GDI1|RPL10|SLC2A1|PPP2R5D|TENM3|DAG1|ADSL|CASK|CDC42
GO Cellular Component	Dendrite	5.74e-06	3031	2.52e-07	0.524109	GO:0030425	624	42	YKT6|SLC1A4|CANX|HIP1R|ANK3|ZDHHC5|IGF2BP1|ABI2|DIP2B|BCR|ABR|ACAD9|GNAI2|NQO1|MPDZ|TUBB3|PPP2R1A|PTK2|FYN|MINK1|KIRREL1|COMT|GLRX3|TPBG|NCS1|IL6ST|WASF1|GIPC1|ITGB1|CTNND1|EPHB2|ATP2B1|RHOA|GPHN|CDK5|SIPA1L1|PPP1R9B|CYFIP1|FARP1|DOCK10|EIF4A3|CDC42
GO Biological Process	Dendrite development	2.92e-07	3031	2.98e-09	0.653462	GO:0016358	115	19	NRP1|IGF2BP1|HPRT1|CRK|PAK2|PRMT3|FYN|MINK1|TPBG|ABI1|PICALM|ITGB1|EPHB2|NFATC4|CDK5|PPP1R9B|FARP1|DOCK10|CDC42
GO Biological Process	Dendrite morphogenesis	2.83e-08	3031	2.42e-10	0.754821	GO:0048813	63	16	NRP1|IGF2BP1|HPRT1|PRMT3|FYN|MINK1|TPBG|ABI1|PICALM|ITGB1|EPHB2|NFATC4|CDK5|FARP1|DOCK10|CDC42
GO Cellular Component	Dendritic spine	2.5e-05	3031	1.27e-06	0.460206	GO:0043197	176	19	CANX|HIP1R|IGF2BP1|ABI2|BCR|ABR|PTK2|GIPC1|ITGB1|CTNND1|EPHB2|ATP2B1|RHOA|SIPA1L1|PPP1R9B|CYFIP1|FARP1|DOCK10|CDC42
GO Biological Process	Dendritic spine development	0.0435	3031	0.0019	0.136151	GO:0060996	29	5	PAK2|PRMT3|EPHB2|DOCK10|CDC42
GO Biological Process	Dendritic spine organization	0.0149	3031	0.00054	0.182681	GO:0097061	33	6	ITGA3|PRMT3|FYN|EPHB2|DOCK10|CDC42
Monarch Phenotype	Depressed nasal bridge	0.0323	3031	0.00066	0.14908	HP:0005280	511	28	SNAP29|SLC1A4|MPP5|SLC12A2|MAP2K2|CBL|PIK3C2A|CDH11|CDH2|INPPL1|MAP2K1|RPS15A|FTSJ1|ACSL4|PSMD12|LONP1|MAP3K7|NRAS|DPM1|STXBP1|FAT4|GDI1|RAB3GAP1|FLNB|PLCB3|CASK|RPS7|RPL11
GO Biological Process	Detection of muscle stretch	0.0438	3031	0.002	0.135853	GO:0035995	7	3	CDH2|PTK2|CTNNB1
Reactome Pathways	Developmental Biology	1.51e-16	3031	7.96e-19	1.5821	HSA-1266738	1108	89	RANBP9|PSMC4|EFNB1|PSMD10|PSMA2|RPL19|ARPC3|DOK1|PLCG1|VASP|ITGAV|PSMC1|PSMD11|AJUBA|MAP2K2|ACTR3|FARP2|TUBB4A|NRP1|PRKAR2A|CDH2|RASA1|EGFR|ANK3|ITGA5|ITGA2|MAP2K1|CTNNA1|PAK2|MET|RPS15A|TUBB6|TUBB3|AP2A2|EZR|PTK2|TUBB4B|RPS2|DPYSL3|DLG1|RPLP1|RPS3A|FYN|SRGAP1|PDLIM7|PSMD12|EPHB4|EPHA2|AP2A1|MSN|UTRN|NRAS|PSME1|DNM2|PKP4|PLXNA1|RPL34|PPP3CB|ITGB1|EPHB2|ARPC1B|GSPT1|RHOA|SHC1|RPL6|RPL10|CUL2|POLR2…
GO Biological Process	Developmental growth involved in morphogenesis	0.0358	3031	0.0015	0.144612	GO:0060560	131	11	NRP1|IQGAP1|CPNE1|WASF1|PLXNA1|PPP3CB|ITGB1|CDK5|YAP1|CYFIP1|CTNNB1
GO Biological Process	Developmental process	1.56e-15	3031	2.79e-18	1.48069	GO:0032502	5657	252	RALA|DVL2|PSMC4|YTHDC2|EFNB1|TAB1|CSK|RIPK2|AIMP2|SERPINE1|ACTA2|RAB35|SNX17|VASP|CANX|TSG101|NECTIN2|NUMBL|HIP1R|EXOC4|LGALS3|RRAS2|CCNB1|NOTCH2|BCAR3|ITGAV|MPP5|PSMD11|TAOK1|AARS1|PDGFRB|SNX1|SLC12A2|AJUBA|MAP2K2|PACSIN2|NAPA|SLC9A1|ARCN1|CBL|FARP2|CUL3|RAPGEF2|RAB10|PDCD6|CDH6|NRP1|SRI|ACAT1|PXN|IQGAP1|CDH11|CDH2|SCYL1|RASA1|EGFR|DOCK11|VPS51|ANK3|SH3RF1|FLCN|AKR1B1|NRG1|MYO1E|IGF2BP1|BAX|ITGA…
UniProt Keywords	Diamond-Blackfan anemia	0.0315	3031	0.003	0.150169	KW-1024	19	4	RPS15A|RPS7|RPL11|RPS27
TISSUES	Digestive gland	5.27e-57	3031	2.17e-60	5.62782	BTO:0000345	2881	241	PSMC4|SNAP29|PYGB|TPD52L2|AHCY|PSMD10|CDC37|NAMPT|SERPINE1|PSMA2|YKT6|SEC61B|AK1|ACTA2|RPL19|GALK1|SLC25A11|LRRC59|CD82|ARPC3|SNX17|VASP|TRAP1|CANX|PMPCB|SNAP23|NECTIN2|HIP1R|PI4KA|CCT7|ITGAV|PSMC1|PSMD11|AARS1|HACD3|SNX1|AJUBA|MAP2K2|ACTR3|EHD2|NAPA|ARCN1|TUBB4A|RAB7A|NRP1|ACAT1|PIK3C2A|PXN|IQGAP1|CDH2|PFKL|PGD|EGFR|CCT6A|NONO|CCT5|ANK3|QDPR|GNAQ|UBE2L6|CSTB|ITGA5|ITGB5|RPN1|ANXA5|ITGA2|ARF6|HPR…
KEGG Pathways	Dilated cardiomyopathy	0.00082	3031	0.00011	0.308619	hsa05414	94	11	ITGAV|ITGA5|ITGB5|ITGA2|ITGA3|TPM1|ITGB1|DAG1|ITGA7|ACTG1|TPM2
DISEASES	Disease	0.0082	3031	4.08e-06	0.208619	DOID:4	6291	223	EFNB1|SNAP29|PYGB|AHCY|RP2|RIPK2|AIMP2|SERPINE1|AK1|ACTA2|GALK1|SLC25A11|CD82|EXOC2|SLC1A4|PMPCB|CNN1|LGALS3|PI4KA|RRAS2|NOTCH2|PRPH|AARS1|PDGFRB|SLC12A2|MAP2K2|SLC9A1|EHBP1|ARCN1|CBL|FARP2|TUBB4A|CUL3|RAPGEF2|RAB10|RAB7A|CDH6|NRP1|TNPO3|ACAT1|PIK3C2A|IDE|CDH11|CDH2|SCYL1|RASA1|EGFR|NONO|DOCK11|CCT5|USP15|ANK3|QDPR|RPIA|FLCN|AKR1B1|GNAQ|ZDHHC5|NRG1|CSTB|BAX|ITGA2|ERAP1|DNAAF5|INPPL1|HPRT1|STAT6|C…
Reactome Pathways	Disease	1.18e-19	3031	5.15e-22	1.89281	HSA-1643685	1702	122	DVL2|PSMC4|TAB1|AHCY|PSMD10|CSK|RIPK2|CDC37|PSMA2|RPL19|GALK1|ARPC3|PLCG1|CANX|TSG101|NOTCH2|PSMC1|IPO5|MPP5|PSMD11|PDGFRB|MAP2K2|ACTR3|CBL|TUBB4A|CUL3|RAB7A|NRP1|PRKAR2A|VPS37B|IQGAP1|EGFR|RPIA|ZDHHC5|NRG1|ABI2|RPN1|HPRT1|CRK|MAP2K1|BCR|YWHAG|SEC23A|CSPG4|GNAI2|PAK2|MET|VPS37A|RPS15A|TUBB6|TUBB3|TUFM|PPP2R1A|BGN|AP2A2|HGS|PTK2|TUBB4B|RPS2|RPLP1|RPS3A|ATG7|FYN|PSMD12|AP1B1|CASP8|AP2A1|PCBP2|MSN|N…
DISEASES	Disease of anatomical entity	0.0082	3031	3.56e-06	0.208619	DOID:7	4798	179	EFNB1|SNAP29|RP2|AIMP2|SERPINE1|AK1|ACTA2|GALK1|SLC25A11|CD82|EXOC2|SLC1A4|PMPCB|CNN1|LGALS3|PI4KA|NOTCH2|PRPH|AARS1|PDGFRB|SLC12A2|MAP2K2|SLC9A1|EHBP1|ARCN1|FARP2|TUBB4A|CUL3|RAPGEF2|RAB10|RAB7A|NRP1|TNPO3|PIK3C2A|IDE|CDH2|SCYL1|RASA1|EGFR|DOCK11|CCT5|USP15|ANK3|QDPR|RPIA|FLCN|AKR1B1|GNAQ|ZDHHC5|NRG1|CSTB|BAX|ITGA2|ERAP1|INPPL1|HPRT1|STAT6|AXL|MAP2K1|BCR|CTNNA1|YWHAG|PFAS|ITGA3|DNMBP|MET|VPS37A|…
Reactome Pathways	Signaling by ROBO receptors	3.97e-12	3031	2.79e-14	1.14012	HSA-376176	215	33	PSMC4|PSMD10|PSMA2|RPL19|VASP|PSMC1|PSMD11|NRP1|PRKAR2A|PAK2|RPS15A|RPS2|RPLP1|RPS3A|SRGAP1|PSMD12|PSME1|RPL34|PPP3CB|GSPT1|RHOA|RPL6|RPL10|CUL2|RPS13|DAG1|RPS4Y2|RPL9|RPS7|RPL11|EIF4A3|CDC42|RPS27
Reactome Pathways	Dissolution of Fibrin Clot	0.0468	3031	0.0082	0.132975	HSA-75205	13	3	SERPINE1|ANXA2|SERPINB6
GO Cellular Component	Distal axon	0.00039	3031	2.35e-05	0.340894	GO:0150034	281	22	EXOC4|CBL|IQGAP1|IGF2BP1|ITGA2|ITGA3|BASP1|TUBB3|EXOC7|SEPTIN6|DPYSL3|TPBG|ABI1|FSCN1|DNM2|CTNND1|CDK5|CFL1|ACTG1|PPP1R9B|CYFIP1|EPS8
WikiPathways	DNA damage response (only ATM dependent)	0.0376	3031	0.0044	0.142481	WP710	109	9	DVL2|PIK3C2A|BAX|MAP3K7|NRAS|RHOA|SHC1|CTNNB1|CDC42
GO Biological Process	Receptor-mediated endocytosis	3.37e-05	3031	5.69e-07	0.447237	GO:0006898	166	19	SNX17|CANX|HIP1R|SNX1|EGFR|AP2A2|HGS|EZR|ITSN2|PDLIM7|AP2A1|DNM2|SNX9|WASF1|PICALM|ITGB1|REPS1|FCHO2|PIP5K1C
STRING Clusters	Domain of unknown function DUF5600, and This domain is found in eukaryotes. This domain is typically between 135 and 149 amino acids in length and is found associated with the CH domain.	0.0089	3031	0.00014	0.205061	CL:14984	7	4	EHD4|EHD2|EHBP1|EHD1
SMART Domains	Domain present in PSD-95, Dlg, and ZO-1/2.	5.76e-07	3031	1.4e-09	0.623958	SM00228	151	22	DVL2|MPP6|MPP5|RAPGEF2|RAPGEF6|MPDZ|DLG1|PDLIM7|SCRIB|AFDN|MPP1|PDLIM1|DLG5|PARD3|AHNAK|GIPC1|MAGI1|ERBIN|TJP2|SIPA1L1|PPP1R9B|CASK
KEGG Pathways	Dopaminergic synapse	0.0322	3031	0.0103	0.149214	hsa04728	126	9	GNAQ|GNAI2|PPP2R1A|PLCB1|COMT|GNAI3|PPP3CB|PPP2R5D|PLCB3
GO Biological Process	Dorsal root ganglion development	0.0438	3031	0.002	0.135853	GO:1990791	7	3	NRP1|TUBB3|CTNNB1
Monarch Phenotype	Downslanted palpebral fissures	4.13e-05	3031	1.02e-07	0.438405	HP:0000494	427	34	EFNB1|SNAP29|RRAS2|NOTCH2|MPP5|AARS1|PDGFRB|SLC12A2|MAP2K2|CBL|CDH11|CDH2|NONO|MAP2K1|YWHAG|MPDZ|TUBB3|PPP2R1A|FTSJ1|BGN|ACSL4|PSMD12|MAP3K7|NRAS|DPM1|STXBP1|FGD1|GDI1|RAB3GAP1|PPP2R5D|ACTG1|CDC42|TTC37|AMPD2
Reactome Pathways	Downstream signal transduction	0.0033	3031	0.00029	0.248149	HSA-186763	29	6	PLCG1|PDGFRB|RASA1|STAT6|CRK|NRAS
STRING Clusters	Downstream signal transduction, and GRB2-associated-binding protein 1-4-like	0.0091	3031	0.00015	0.204096	CL:17509	15	5	PLCG1|PDGFRB|CRK|PTK2|SHC1
Reactome Pathways	Fcgamma receptor (FCGR) dependent phagocytosis	3.06e-08	3031	4.56e-10	0.751428	HSA-2029480	89	18	ARPC3|PLCG1|ACTR3|ABI2|CRK|PTK2|FYN|NCKAP1|ABI1|WASF1|ARPC1B|MYO10|CFL1|ACTG1|YES1|CYFIP1|WASF2|CDC42
Reactome Pathways	Downstream TCR signaling	0.0041	3031	0.0004	0.238722	HSA-202424	92	10	PSMC4|PSMD10|RIPK2|PSMA2|PSMC1|PSMD11|PSMD12|MAP3K7|CHUK|PSME1
GO Cellular Component	Early endosome	0.0166	3031	0.0015	0.177989	GO:0005769	411	23	EHD4|SNX8|SNX17|TSG101|SNX1|MAP2K2|PACSIN2|EHD2|NRP1|EGFR|ARF6|MAP2K1|LLGL1|HGS|ATP11C|ANXA2|AP1B1|RAP1A|SNX2|PICALM|RAB1A|EHD1|WASF2
WikiPathways	Ebola virus infection in host	0.00019	3031	7.36e-06	0.372125	WP4217	129	15	TSG101|ITGAV|RAB7A|IQGAP1|EGFR|ITGA5|ITGA2|AXL|ITGA3|CTSB|ITGB1|RHOA|FLNB|ACTG1|CDC42
Reactome Pathways	ECM proteoglycans	0.0137	3031	0.0018	0.186328	HSA-3000178	76	8	SERPINE1|ITGAV|ITGB5|ITGA2|BGN|ITGB1|DAG1|ITGA7
Reactome Pathways	Neurotransmitter receptors and postsynaptic signal transmission	0.00045	3031	3.06e-05	0.334679	HSA-112314	204	18	TUBB4A|PRKAR2A|NRG1|GNAI2|TUBB6|TUBB3|AP2A2|EPB41L1|PLCB1|TUBB4B|DLG1|AP2A1|NRAS|GNAI3|PRKAB1|TUBA1C|PLCB3|CASK
Monarch Phenotype	Edema	0.0037	3031	3.66e-05	0.24318	HP:0000969	448	29	AHCY|RRAS2|MAP2K2|CBL|ACAT1|CDH11|RASA1|VPS51|GNAQ|MYO1E|INPPL1|MAP2K1|ACAD9|MET|RPS15A|EPHB4|CASP8|MYPN|MYLK|PTPN14|NRAS|FAT4|FLNB|ACTG1|PHGDH|RPS7|CTNNB1|RPL11|CDC42
Monarch Phenotype	Educational attainment	0.0055	3031	6.85e-05	0.225964	EFO:0011015	1037	51	MPP6|SNX8|EXOC4|CCT7|BCAR3|PACSIN2|FARP2|CUL3|CDH2|ZDHHC5|IGF2BP1|BCR|PCDHGC3|TUBB3|PLCB1|PTK2|DLG1|SRGAP1|PCBP2|PTPRF|MYLK|IPO9|UTRN|EPB41L2|RARS2|RAP1A|CHUK|DNAJB4|STK4|STXBP1|PHACTR4|BICC1|PARD3|PKP4|ARAP1|RAB2B|MAGI1|TKT|RHOA|TBC1D5|TENM3|PTPRK|TJP2|CAND1|DAG1|TUBA1C|PCDHGB5|FARP1|HSPA12A|DOCK10|MTHFD1
Monarch Phenotype	EEG with generalized epileptiform discharges	0.0302	3031	0.0006	0.151999	HP:0011198	241	17	AIMP2|SLC1A4|PI4KA|AARS1|SLC12A2|CSTB|YWHAG|FMN2|UGDH|PLCB1|EZR|LONP1|STXBP1|ASNS|SLC2A1|PHGDH|CASK
WikiPathways	EGF/EGFR signaling pathway	8.45e-10	3031	6.49e-12	0.907314	WP437	162	26	RALA|CSK|PLCG1|MAP2K2|CBL|IQGAP1|RALB|RASA1|EGFR|INPPL1|ARF6|CRK|MAP2K1|HGS|ARHGEF1|PTK2|AP2A1|RAP1A|STXBP1|ABI1|SHC1|EPN1|CFL1|EPS8|CDC42|JAK1
Reactome Pathways	EGFR downregulation	0.0042	3031	0.0004	0.237675	HSA-182971	31	6	CBL|EGFR|HGS|EPN1|PTPRK|CDC42
KEGG Pathways	EGFR tyrosine kinase inhibitor resistance	5.26e-05	3031	4.22e-06	0.427901	hsa01521	77	12	PLCG1|PDGFRB|MAP2K2|EGFR|NRG1|BAX|AXL|MAP2K1|MET|NRAS|SHC1|JAK1
WikiPathways	EGFR tyrosine kinase inhibitor resistance	6.6e-05	3031	1.61e-06	0.418046	WP4806	83	13	PLCG1|RRAS2|PDGFRB|MAP2K2|EGFR|NRG1|BAX|AXL|MAP2K1|MET|NRAS|SHC1|JAK1
InterPro Domains	EH domain	0.0082	3031	4.54e-05	0.208619	IPR000261	11	5	EHD4|EHD2|ITSN2|REPS1|EHD1
TISSUES	Embryo	2.66e-05	3031	8.02e-07	0.457512	BTO:0000379	824	49	RANBP9|PSMC4|PSMD10|PSMA2|SEC61B|PSMC1|PSMD11|PPP1R12C|SLC9A1|RAPGEF2|PXN|CDH2|NONO|CCT5|ANK3|RIC8A|SEPTIN6|ITSN2|PDLIM7|PSMD12|ATP2B4|MYPN|IQGAP3|AFDN|PTPN14|TIPRL|DNAJB4|AMOT|AHNAK|PSME1|GARS1|LUC7L3|CTNND1|ATG4B|AKAP12|SLC4A7|PHLDB2|FNBP1|PPP2R5D|FLNB|PBK|CAND1|TBC1D15|COPE|YAP1|RPS7|CTNNB1|CDC42|ARHGAP35
GO Biological Process	Embryo development	7.95e-05	3031	1.51e-06	0.409963	GO:0009790	1049	57	RALA|DVL2|PSMC4|EFNB1|TAB1|VASP|EXOC4|CCNB1|NOTCH2|ITGAV|MPP5|CUL3|PDCD6|NRP1|EGFR|FLCN|MYO1E|BAX|ITGA5|ITGB5|ITGA2|COPS2|MAP2K1|BCR|MMP14|ITGA3|BASP1|UGDH|RIC8A|PLS1|ACSL4|DLG1|SCRIB|EPHA2|CASP8|PLXNB2|NSDHL|AMOT|STK4|PHACTR4|EIF2S2|ABI1|ITGB1|EPHB2|TPRN|EPN1|RPL10|TXNRD1|ITGA7|YAP1|PHGDH|RPS7|CTNNB1|EIF4A3|CDC42|MTHFD1|ARHGAP35
GO Biological Process	Embryo development ending in birth or egg hatching	0.0033	3031	9.67e-05	0.248149	GO:0009792	676	37	RALA|DVL2|PSMC4|TAB1|VASP|CCNB1|NOTCH2|CUL3|PDCD6|EGFR|FLCN|MYO1E|COPS2|MAP2K1|MMP14|RIC8A|ACSL4|DLG1|SCRIB|EPHA2|CASP8|PLXNB2|NSDHL|AMOT|STK4|PHACTR4|EIF2S2|ABI1|ITGB1|EPN1|YAP1|PHGDH|RPS7|CTNNB1|EIF4A3|MTHFD1|ARHGAP35
GO Biological Process	Embryonic epithelial tube formation	0.0311	3031	0.0013	0.150724	GO:0001838	128	11	RALA|DVL2|VASP|SCRIB|PLXNB2|STK4|PHACTR4|RPS7|CTNNB1|MTHFD1|ARHGAP35
GO Biological Process	Embryonic morphogenesis	0.00029	3031	6.17e-06	0.35376	GO:0048598	590	37	RALA|DVL2|VASP|EXOC4|NOTCH2|ITGAV|MPP5|CUL3|BAX|ITGA5|ITGB5|ITGA2|MAP2K1|BCR|MMP14|ITGA3|UGDH|RIC8A|PLS1|DLG1|SCRIB|EPHA2|PLXNB2|AMOT|STK4|PHACTR4|ITGB1|EPHB2|TPRN|TXNRD1|ITGA7|YAP1|RPS7|CTNNB1|EIF4A3|MTHFD1|ARHGAP35
TISSUES	Embryonic structure	2.05e-35	3031	1.44e-37	3.46882	BTO:0000174	2369	181	RANBP9|PSMC4|EFNB1|TPD52L2|AHCY|PSMD10|CDC37|SERPINE1|PSMA2|SEC61B|ACTA2|EXOC2|SNX17|ADGRE5|CANX|SNAP23|TSG101|CNN1|CCNB1|ARF3|PRPH|CCT7|PSMC1|PSMD11|AARS1|SNX1|COTL1|EHD2|NAPA|PPP1R12C|SLC9A1|TUBB4A|RAPGEF2|PDCD6|RAB7A|PXN|IQGAP1|CDH2|RASA1|EGFR|NONO|CCT5|USP15|ANK3|AKR1B1|GNAQ|CSTB|ITGA5|ANXA5|CYTH3|CRK|CTNNA1|MMP14|RAB1B|DNAJA2|PAK2|RPS15A|RAP2B|UGDH|PKM|TUFM|PPP2R1A|COPG1|HNRNPM|RIC8A|EIF4A2|…
Reactome Pathways	EML4 and NUDC in mitotic spindle formation	0.002	3031	0.00017	0.269897	HSA-9648025	116	12	TAOK1|TUBB4A|TUBB6|NUDC|TUBB3|PPP2R1A|TUBB4B|NEK6|MAPRE1|PPP2R5D|TUBA1C|RPS27
KEGG Pathways	Endocrine and other factor-regulated calcium reabsorption	0.00027	3031	2.82e-05	0.356864	hsa04961	51	9	GNAQ|AP2A2|PLCB1|ATP2B4|AP2A1|DNM2|ATP2B1|PLCB3|ATP1A1
TISSUES	Endocrine gland	5.13e-49	3031	1.06e-51	4.82899	BTO:0001488	6403	350	BAIAP2L1|DVL2|RANBP9|PSMC4|SNAP29|PYGB|TPD52L2|AHCY|PSMD10|CDC37|NAMPT|SERPINE1|PSMA2|YKT6|SEC61B|AK1|ACTA2|RPL19|GALK1|SLC25A11|LRRC59|CD82|ARPC3|EXOC2|SNX17|DDX39A|ADGRE5|PLCG1|VASP|TRAP1|CANX|CDC42EP1|PMPCB|SNAP23|CNN1|NECTIN2|HIP1R|EXOC4|PI4KA|ARF3|CCT7|BCAR3|ITGAV|PSMC1|IPO5|PSMD11|TAOK1|ANKRD13A|AARS1|HACD3|SNX1|COTL1|AJUBA|MAP2K2|ACTR3|PACSIN2|EHD2|NAPA|PPP1R12C|EHBP1|ARCN1|FARP2|TUBB4A|CU…
KEGG Pathways	Endocrine resistance	0.0207	3031	0.006	0.168403	hsa01522	94	8	NOTCH2|MAP2K2|EGFR|BAX|MAP2K1|PTK2|NRAS|SHC1
GO Biological Process	Endocytic recycling	5.62e-05	3031	1.01e-06	0.425026	GO:0032456	66	12	EHD4|RAB35|SNX17|EHD2|RAB7A|VPS51|ARF6|HGS|RAB11B|SCRIB|RAB13|EHD1
COMPARTMENTS	Endocytic vesicle	0.00061	3031	2.35e-05	0.321467	GOCC:0030139	260	21	DVL2|RAB35|SNAP23|ITGAV|RAPGEF2|RAB7A|EGFR|ZDHHC5|ITGB5|RAPGEF6|ARF6|AP2A2|HGS|RAB11B|AP2A1|RAB13|AMOT|DNM2|PICALM|ANXA11|HSPH1
GO Cellular Component	Endocytic vesicle	1.75e-06	3031	6.66e-08	0.575696	GO:0030139	338	30	DVL2|EHD4|RAB35|SNAP23|ITGAV|EHD2|RAPGEF2|RAB10|RAB7A|EGFR|ZDHHC5|ITGB5|RAPGEF6|ARF6|AP2A2|HGS|RAB11B|AP2A1|RAB13|STXBP3|AMOT|STXBP1|DNM2|PICALM|ANXA11|FLNB|ACTG1|EHD1|HSPH1|CDC42
GO Biological Process	Endocytosis	3.87e-10	3031	2.27e-12	0.941229	GO:0006897	447	44	EHD4|SNX17|CANX|HIP1R|SNX1|PACSIN2|EHD2|EHBP1|RAB7A|PIK3C2A|EGFR|MYO1E|INPPL1|ARF6|AP2A2|HGS|EZR|SNX18|ARHGAP12|ITSN2|PDLIM7|SCRIB|AP2A1|SNX2|DNM2|SNX9|WASF1|PICALM|ITGB1|STON1|SH3BP4|RAB1A|NECAP2|REPS1|FCHO2|EPN1|FNBP1|CDK5|CLINT1|ACTG1|PIP5K1C|EHD1|WASF2|CDC42
KEGG Pathways	Endocytosis	7.84e-11	3031	2.33e-12	1.01057	hsa04144	241	32	ARF5|EHD4|ARPC3|RAB35|TSG101|ARF3|SNX1|SMURF2|EHD2|CBL|RAB10|RAB7A|VPS37B|EGFR|CYTH3|ARF6|VPS37A|AP2A2|HGS|RAB11B|AP2A1|VTA1|PARD3|HSPA1L|SNX2|DNM2|ARAP1|ARPC1B|RHOA|PIP5K1C|EHD1|CDC42
UniProt Keywords	Endocytosis	5.62e-07	3031	1.42e-08	0.625026	KW-0254	128	19	HIP1R|PACSIN2|EHBP1|PIK3C2A|AP2A2|SNX18|ITSN2|AP2A1|DNM2|SNX9|PICALM|STON1|SH3BP4|NECAP2|FCHO2|EPN1|FNBP1|CLINT1|PIP5K1C
GO Biological Process	Endodermal cell differentiation	0.0113	3031	0.00039	0.194692	GO:0035987	44	7	ITGAV|ITGA5|ITGB5|MAP2K1|MMP14|ITGA7|CTNNB1
COMPARTMENTS	Endomembrane system	2.46e-10	3031	3.95e-12	0.960906	GOCC:0012505	3156	151	SNAP29|TAB1|PYGB|EHD4|TBC1D17|SNX8|SERPINE1|PSMA2|YKT6|SEC61B|LRRC59|RAB35|SNX17|CANX|SNAP23|TSG101|HIP1R|WDR44|LGALS3|ARF3|ITGAV|IPO5|PSMD11|ANKRD13A|HACD3|SNX1|COTL1|MAP2K2|PACSIN2|EHD2|ARCN1|CBL|RAPGEF2|RAB10|PDCD6|RAB7A|NRP1|TNPO3|SRI|PIK3C2A|VPS37B|CDH2|PFKL|SCYL1|ARL8A|EGFR|VPS51|ANK3|CSTB|BAX|RPN1|ERAP1|CYTH3|INPPL1|ARF6|MAP2K1|SEC23A|MMP14|RAB1B|ARHGAP1|CSPG4|CPNE1|VPS37A|RAP2B|PKM|LLGL1|…
GO Cellular Component	Endomembrane system	2.17e-15	3031	3.71e-17	1.46635	GO:0012505	4721	219	ARF5|YTHDC2|SNAP29|TAB1|PYGB|RP2|EHD4|TBC1D17|SNX8|SERPINE1|PSMA2|YKT6|SEC61B|LRRC59|RAB35|SNX17|ADGRE5|CANX|CDC42EP1|SNAP23|TSG101|HIP1R|WDR44|LGALS3|RRAS2|NOTCH2|ARF3|ITGAV|IPO5|MPP5|PSMD11|ANKRD13A|PDGFRB|HACD3|SNX1|COTL1|RAB2A|AJUBA|MAP2K2|PACSIN2|EHD2|SLC9A1|EHBP1|ARCN1|CBL|CUL3|RAPGEF2|RAB10|PDCD6|RAB7A|NRP1|TNPO3|SRI|PIK3C2A|VPS37B|IQGAP1|CDH2|PFKL|SCYL1|ARL8A|EGFR|VPS51|ANK3|SH3RF1|GNAQ|C…
GO Biological Process	Endomembrane system organization	0.00087	3031	2.08e-05	0.306048	GO:0010256	552	34	BAIAP2L1|SNAP29|SNAP23|TSG101|NECTIN2|MPP5|RAB2A|PACSIN2|EHD2|RAB10|VPS37B|VPS51|ANK3|RAB1B|VPS37A|HGS|MTSS2|SNX18|AP1B1|ANKLE2|VTA1|NEK6|OPTN|SNX9|SEC31A|RAB2B|AGFG1|RAB1A|CORO1C|NSFL1C|BCAS3|ARL8B|UBAP1|CDC42
KEGG Pathways	Endometrial cancer	0.0023	3031	0.00036	0.263827	hsa05213	58	8	MAP2K2|EGFR|BAX|MAP2K1|CTNNA1|NRAS|ILK|CTNNB1
WikiPathways	Endometrial cancer	0.0071	3031	0.00059	0.214874	WP4155	63	8	MAP2K2|EGFR|BAX|MAP2K1|CTNNA1|NRAS|ILK|CTNNB1
GO Biological Process	Endoplasmic reticulum to Golgi vesicle-mediated transport	0.0281	3031	0.0011	0.155129	GO:0006888	126	11	YKT6|RAB2A|ARCN1|CUL3|PDCD6|SEC23A|RAB1B|COPG1|SEC31A|RAB1A|COPE
Reactome Pathways	Endosomal Sorting Complex Required For Transport (ESCRT)	0.0042	3031	0.0004	0.237675	HSA-917729	31	6	TSG101|VPS37B|VPS37A|HGS|VTA1|UBAP1
GO Biological Process	Endosomal transport	1.41e-10	3031	7.57e-13	0.985078	GO:0016197	230	32	EHD4|TBC1D17|SNX8|YKT6|RAB35|SNX17|TSG101|SNX1|EHD2|RAB10|RAB7A|VPS37B|VPS51|ARF6|ARHGAP1|VPS37A|HGS|RAB11B|SNX18|ITSN2|SCRIB|VTA1|RAB13|SNX2|SNX9|PICALM|REPS1|CORO1C|TBC1D5|EHD1|ARL8B|UBAP1
COMPARTMENTS	Endosome	1.72e-09	3031	3.06e-11	0.876447	GOCC:0005768	671	53	TAB1|EHD4|TBC1D17|SNX8|YKT6|RAB35|SNX17|TSG101|WDR44|ANKRD13A|SNX1|MAP2K2|PACSIN2|EHD2|RAPGEF2|RAB10|RAB7A|NRP1|VPS37B|EGFR|VPS51|ARF6|MAP2K1|MMP14|ARHGAP1|VPS37A|RAP2B|LLGL1|AP2A2|HGS|RAB12|RAB11B|EZR|SNX18|CTSB|ANXA2|FYN|AP2A1|VTA1|RAB13|MAP3K7|RAP1A|OPTN|SNX2|PICALM|ITGB1|CORO1C|TBC1D5|RAN|PIP5K1C|EHD1|UBAP1|JAK1
GO Cellular Component	Endosome	3.26e-09	3031	7.8e-11	0.848678	GO:0005768	1030	68	TAB1|EHD4|TBC1D17|SNX8|YKT6|RAB35|SNX17|TSG101|WDR44|ANKRD13A|SNX1|MAP2K2|PACSIN2|EHD2|EHBP1|RAPGEF2|RAB10|PDCD6|RAB7A|NRP1|VPS37B|ARL8A|EGFR|VPS51|ARF6|MAP2K1|MMP14|ARHGAP1|VPS37A|RAP2B|LLGL1|AP2A2|HGS|RAB12|ATP11C|RAB11B|EZR|SNX18|CTSB|ANXA2|FYN|AP1B1|AP2A1|VTA1|RAB13|MAP3K7|RAP1A|OPTN|SNX2|DNM2|PICALM|ITGB1|RAB1A|CORO1C|RHOA|TBC1D5|EPN1|AMOTL2|CLINT1|DENND2B|RAN|PRAF2|PIP5K1C|EHD1|ARL8B|WASF2|…
UniProt Keywords	Endosome	8.34e-07	3031	2.23e-08	0.607883	KW-0967	568	42	EHD4|SNX8|RAB35|SNX17|TSG101|WDR44|ANKRD13A|SNX1|PACSIN2|EHD2|EHBP1|RAPGEF2|RAB10|PDCD6|RAB7A|VPS37B|ARL8A|EGFR|VPS51|ARF6|VPS37A|RAP2B|LLGL1|HGS|RAB12|RAB11B|SNX18|VTA1|RAB13|RAP1A|OPTN|SNX2|ITGB1|RAB1A|CORO1C|TBC1D5|AMOTL2|DENND2B|PRAF2|EHD1|ARL8B|UBAP1
COMPARTMENTS	Endosome membrane	1.39e-08	3031	2.6e-10	0.785699	GOCC:0010008	330	34	EHD4|SNX8|RAB35|SNX17|TSG101|WDR44|SNX1|PACSIN2|EHD2|RAB7A|VPS37B|EGFR|ARF6|ARHGAP1|VPS37A|RAP2B|LLGL1|AP2A2|HGS|RAB12|RAB11B|SNX18|ANXA2|AP2A1|VTA1|MAP3K7|OPTN|SNX2|ITGB1|CORO1C|TBC1D5|PIP5K1C|EHD1|UBAP1
GO Cellular Component	Endosome membrane	2.08e-07	3031	5.79e-09	0.668194	GO:0010008	540	42	TAB1|EHD4|SNX8|RAB35|SNX17|TSG101|WDR44|SNX1|PACSIN2|EHD2|RAB10|RAB7A|VPS37B|ARL8A|EGFR|ARF6|ARHGAP1|VPS37A|RAP2B|LLGL1|AP2A2|HGS|RAB12|ATP11C|RAB11B|SNX18|ANXA2|AP2A1|VTA1|RAB13|MAP3K7|RAP1A|OPTN|SNX2|ITGB1|CORO1C|TBC1D5|PRAF2|PIP5K1C|EHD1|ARL8B|UBAP1
GO Biological Process	Endothelial cell development	0.001	3031	2.46e-05	0.3	GO:0001885	50	9	RAPGEF2|MET|EZR|MSN|AFDN|RAP1A|CLIC4|TJP2|RDX
GO Biological Process	Endothelial cell differentiation	0.0015	3031	3.72e-05	0.282391	GO:0045446	82	11	RAPGEF2|NRP1|NRG1|MET|EZR|MSN|AFDN|RAP1A|CLIC4|TJP2|RDX
GO Biological Process	Endothelial cell migration	0.0258	3031	0.001	0.158838	GO:0043542	69	8	NRP1|PXN|EPHB4|RAB13|AMOT|GIPC1|ITGB1|RHOA
GO Biological Process	Endothelium development	0.00038	3031	8.3e-06	0.342022	GO:0003158	98	13	RAPGEF2|NRP1|NRG1|MET|EZR|MSN|AFDN|RAP1A|CLIC4|RHOA|TJP2|CTNNB1|RDX
InterPro Domains	ENTH domain	0.0462	3031	0.00041	0.133536	IPR013809	10	4	HIP1R|PICALM|EPN1|CLINT1
GO Biological Process	Entry into host	6.19e-05	3031	1.12e-06	0.420831	GO:0044409	109	15	NECTIN2|ITGAV|CBL|NRP1|IDE|EGFR|ITGA5|ITGB5|ITGA2|AXL|CTSB|EPHA2|ITGB1|DAG1|SLC1A5
GO Molecular Function	Enzyme activator activity	2.64e-12	3031	1.34e-14	1.15784	GO:0008047	560	54	TAB1|RP2|TBC1D17|CCNB1|TAOK1|HACD3|MAP2K2|RAPGEF2|NRP1|IQGAP1|RASA1|EGFR|FLCN|GNAQ|NRG1|MAP2K1|BCR|ABR|SEC23A|ARHGAP1|PAK2|LLGL1|RASA3|ARHGEF1|PLCB1|PARK7|RAP1GDS1|MTSS2|ARHGAP12|RPLP1|FYN|SRGAP1|GMFB|IQGAP3|ARHGAP18|NCS1|STK4|PHACTR4|ABI1|GDI2|PSME1|XRCC5|ARAP1|AGFG1|GDI1|DDOST|TBC1D5|RAB3GAP1|PPP2R5D|TBC1D15|SIPA1L1|PDCD5|BCAS3|ARHGAP35
GO Molecular Function	Enzyme binding	3.08e-22	3031	8.11e-25	2.15114	GO:0019899	2084	144	RALA|DVL2|RANBP9|YTHDC2|TAB1|CSK|RIPK2|CDC37|SERPINE1|ACTA2|EXOC2|PLCG1|TRAP1|TSG101|EXOC4|LGALS3|CCNB1|NOTCH2|BCAR3|ITGAV|IPO5|PDGFRB|HACD3|COTL1|SLC12A2|PPP1R12C|SLC9A1|CBL|CUL3|RAB7A|NRP1|TNPO3|PRKAR2A|SRI|ACAT1|PXN|IQGAP1|CDH2|PFKL|RALB|RASA1|EGFR|DOCK11|FLCN|UBE2L6|NRG1|CSTB|ABI2|RAPGEF6|ARF6|STAT6|CRK|YWHAG|ARHGAP1|CSPG4|PAK2|ITGA3|MET|TCP1|LLGL1|AP2A2|XPOT|HGS|FMNL3|PLCB1|EZR|PARK7|MTSS2|P…
GO Molecular Function	Enzyme regulator activity	5.29e-14	3031	1.82e-16	1.32765	GO:0030234	1239	90	TAB1|RP2|TBC1D17|CDC37|SERPINE1|LGALS3|CCNB1|BCAR3|IPO5|TAOK1|HACD3|MAP2K2|PPP1R12C|FARP2|RAPGEF2|NRP1|PRKAR2A|IQGAP1|RASA1|EGFR|DOCK11|FLCN|GNAQ|NRG1|CSTB|ANXA5|RAPGEF6|CYTH3|MAP2K1|BCR|ABR|YWHAG|SEC23A|ARHGAP1|PAK2|DNMBP|LLGL1|PPP2R1A|RIC8A|RASA3|ARHGEF1|PLCB1|PARK7|RAP1GDS1|MTSS2|ARHGAP12|ANXA2|RPLP1|FYN|SRGAP1|ITSN2|ATP2B4|ANKLE2|GMFB|IQGAP3|ARHGAP18|RAP1A|NCS1|STK4|PHACTR4|FGD1|ABI1|GDI2|SBF…
Reactome Pathways	Fc epsilon receptor (FCERI) signaling	4.7e-05	3031	2.06e-06	0.43279	HSA-2454202	131	16	PSMC4|TAB1|PSMD10|PSMA2|PLCG1|PSMC1|PSMD11|PAK2|FYN|PSMD12|MAP3K7|NRAS|CHUK|PSME1|PPP3CB|SHC1
Reactome Pathways	EPH-ephrin mediated repulsion of cells	0.00043	3031	2.82e-05	0.336653	HSA-3928665	51	9	EFNB1|AP2A2|FYN|EPHB4|EPHA2|AP2A1|EPHB2|ACTG1|YES1
Reactome Pathways	EPH-Ephrin signaling	4.75e-08	3031	7.28e-10	0.732331	HSA-2682334	92	18	EFNB1|ARPC3|ACTR3|RASA1|PAK2|AP2A2|PTK2|FYN|EPHB4|EPHA2|AP2A1|EPHB2|ARPC1B|RHOA|CFL1|ACTG1|YES1|CDC42
Reactome Pathways	EPHB-mediated forward signaling	1.28e-08	3031	1.63e-10	0.789279	HSA-3928662	42	14	EFNB1|ARPC3|ACTR3|RASA1|PTK2|FYN|EPHB4|EPHB2|ARPC1B|RHOA|CFL1|ACTG1|YES1|CDC42
Reactome Pathways	C-type lectin receptors (CLRs)	0.00025	3031	1.54e-05	0.360206	HSA-5621481	138	15	PSMC4|TAB1|PSMD10|PSMA2|PSMC1|PSMD11|PAK2|FYN|PSMD12|CASP8|MAP3K7|NRAS|CHUK|PSME1|PPP3CB
KEGG Pathways	NOD-like receptor signaling pathway	0.0069	3031	0.0015	0.216115	hsa04621	173	13	TAB1|RIPK2|NAMPT|PLCB1|CTSB|CASP8|MAP3K7|CHUK|PKN2|RHOA|ERBIN|PLCB3|JAK1
Reactome Pathways	Ephrin signaling	0.0039	3031	0.00037	0.240894	HSA-3928664	19	5	EFNB1|PAK2|FYN|EPHB4|EPHB2
UniProt Keywords	Host cell receptor for virus entry	3.2e-05	3031	1.33e-06	0.449485	KW-1183	68	12	NECTIN2|ITGAV|IDE|EGFR|ITGA5|ITGB5|ITGA2|AXL|EPHA2|ITGB1|DAG1|SLC1A5
Monarch Phenotype	Epicanthus	0.0433	3031	0.00096	0.136351	HP:0000286	447	25	NOTCH2|MPP5|SLC12A2|MAP2K2|CBL|PIK3C2A|NONO|VPS51|MAP2K1|RPS15A|UGDH|TUBB3|PSMD12|LONP1|NRAS|NSDHL|FGD1|FAT4|PPP1R12A|RAB3GAP1|RPL10|ACTG1|CASK|RPS7|RPL11
GO Molecular Function	Epidermal growth factor binding	0.0289	3031	0.00061	0.15391	GO:0048408	4	3	SEC61B|EGFR|SHC1
GO Biological Process	Regulation of receptor-mediated endocytosis	0.0033	3031	9.63e-05	0.248149	GO:0048259	109	12	SERPINE1|HIP1R|ITGAV|ANKRD13A|CBL|NRG1|ARF6|ANXA2|SCRIB|DNM2|PICALM|TBC1D5
Monarch Phenotype	Epileptic spasm	0.0384	3031	0.00082	0.141567	HP:0011097	182	14	SLC1A4|PI4KA|TAOK1|SLC12A2|CDH2|FMN2|UGDH|EPB41L1|PLCB1|EZR|LONP1|STXBP1|PHGDH|CASK
GO Biological Process	Epithelial cell development	1.2e-06	3031	1.45e-08	0.592082	GO:0002064	190	23	ACTA2|NOTCH2|RAPGEF2|IQGAP1|CDH2|AKR1B1|MYO1E|ABI2|MET|EZR|FRMD6|EPHA2|MSN|AFDN|RAB13|RAP1A|CLIC4|SDC1|IL6ST|FLNB|TJP2|YAP1|RDX
GO Biological Process	Epithelial cell differentiation	4.97e-08	3031	4.44e-10	0.730364	GO:0030855	617	48	AIMP2|ACTA2|TSG101|LGALS3|NOTCH2|RAPGEF2|RAB10|NRP1|IQGAP1|CDH2|AKR1B1|NRG1|MYO1E|ABI2|ITGA2|MAP2K1|BCR|MET|BASP1|PLS1|EZR|FRMD6|CTSB|SCRIB|EPHA2|MSN|AFDN|TAGLN2|RAB13|RAP1A|CNN3|DLG5|STK4|ANXA7|CLIC4|SDC1|IL6ST|TAGLN|ANXA4|TPRN|SLC4A7|RHOA|FLNB|TJP2|YAP1|CTNNB1|RDX|CDC42
GO Biological Process	Epithelial cell migration	0.0487	3031	0.0023	0.131247	GO:0010631	98	9	NRP1|PXN|EPHB4|RAB13|PKN2|AMOT|GIPC1|ITGB1|RHOA
GO Biological Process	Epithelial cell proliferation	0.0125	3031	0.00044	0.190309	GO:0050673	170	14	NOTCH2|MAP2K2|EGFR|FLCN|BAX|STAT6|MAP2K1|MMP14|DLG1|EPHA2|IQGAP3|STK4|YAP1|CTNNB1
KEGG Pathways	Epithelial cell signaling in Helicobacter pylori infection	0.0122	3031	0.0031	0.191364	hsa05120	65	7	CSK|PLCG1|EGFR|MET|CHUK|ATP6V1C1|CDC42
GO Biological Process	Epithelial tube morphogenesis	0.00066	3031	1.54e-05	0.318046	GO:0060562	315	24	RALA|DVL2|VASP|NOTCH2|NRP1|MMP14|MET|DLG1|SCRIB|EPHA2|PLXNB2|DLG5|STK4|PHACTR4|CLIC4|ILK|NFATC4|RHOA|DAG1|YAP1|RPS7|CTNNB1|MTHFD1|ARHGAP35
GO Biological Process	Epithelium development	3.56e-11	3031	1.61e-13	1.04486	GO:0060429	1069	76	RALA|DVL2|AIMP2|ACTA2|VASP|TSG101|LGALS3|NOTCH2|MPP5|AJUBA|MAP2K2|RAPGEF2|RAB10|NRP1|ACAT1|IQGAP1|CDH2|EGFR|AKR1B1|NRG1|MYO1E|ITGA5|ABI2|ITGA2|STAT6|MAP2K1|BCR|MMP14|MET|BASP1|PLS1|EZR|FRMD6|CTSB|DLG1|ARHGAP12|SCRIB|EPHA2|PLXNB2|MSN|IQGAP3|AFDN|TAGLN2|RAB13|RAP1A|CNN3|NSDHL|DLG5|STK4|ANXA7|PHACTR4|CLIC4|ABI1|SDC1|IL6ST|TAGLN|PLXNA1|ANXA4|ITGB1|ILK|TPRN|NFATC4|SLC4A7|RHOA|FLNB|TJP2|DAG1|ACTG1|YAP1…
SMART Domains	Eps15 homology domain	0.0026	3031	3.19e-05	0.258503	SM00027	10	5	EHD4|EHD2|ITSN2|REPS1|EHD1
SMART Domains	Epsin N-terminal homology (ENTH) domain	0.0162	3031	0.0003	0.179048	SM00273	9	4	HIP1R|PICALM|EPN1|CLINT1
Reactome Pathways	ER to Golgi Anterograde Transport	2.22e-05	3031	8.55e-07	0.465365	HSA-199977	154	18	ARF5|YKT6|ARF3|NAPA|ARCN1|TUBB4A|ANK3|SEC23A|RAB1B|TUBB6|TUBB3|NAPG|COPG1|TUBB4B|SEC31A|RAB1A|TUBA1C|COPE
UniProt Keywords	ER-Golgi transport	4.47e-06	3031	1.42e-07	0.534969	KW-0931	91	15	ARF5|YKT6|ARF3|RAB2A|NAPA|ARCN1|CUL3|SCYL1|SEC23A|NAPG|COPG1|SEC31A|RAB2B|RAB1A|COPE
Reactome Pathways	ER-Phagosome pathway	0.0034	3031	0.00031	0.246852	HSA-1236974	89	10	PSMC4|PSMD10|PSMA2|SEC61B|SNAP23|PSMC1|PSMD11|PSMD12|CHUK|PSME1
GO Biological Process	ERBB signaling pathway	0.0038	3031	0.00011	0.242022	GO:0038127	62	9	PLCG1|CBL|PIK3C2A|IQGAP1|EGFR|NRG1|PTK2|SHC1|ERBIN
KEGG Pathways	ErbB signaling pathway	0.00031	3031	3.36e-05	0.350864	hsa04012	81	11	PLCG1|MAP2K2|CBL|EGFR|NRG1|CRK|MAP2K1|PAK2|PTK2|NRAS|SHC1
WikiPathways	ErbB signaling pathway	0.0013	3031	7.32e-05	0.288606	WP673	89	11	PLCG1|MAP2K2|CBL|EGFR|NRG1|CRK|MAP2K1|PAK2|PTK2|NRAS|SHC1
Reactome Pathways	Signaling by the B Cell Receptor (BCR)	0.0017	3031	0.00013	0.276955	HSA-983705	113	12	PSMC4|PSMD10|PSMA2|PSMC1|PSMD11|FYN|PSMD12|MAP3K7|NRAS|CHUK|PSME1|PPP3CB
COMPARTMENTS	ESCRT complex	0.0052	3031	0.00025	0.2284	GOCC:0036452	28	6	TSG101|VPS37B|VPS37A|HGS|VTA1|UBAP1
GO Cellular Component	ESCRT complex	0.0164	3031	0.0015	0.178516	GO:0036452	27	5	TSG101|VPS37B|VPS37A|HGS|UBAP1
COMPARTMENTS	ESCRT I complex	0.008	3031	0.00041	0.209691	GOCC:0000813	10	4	TSG101|VPS37B|VPS37A|UBAP1
GO Cellular Component	ESCRT I complex	0.0067	3031	0.00054	0.217393	GO:0000813	11	4	TSG101|VPS37B|VPS37A|UBAP1
STRING Clusters	ESCRT I complex	0.0386	3031	0.00096	0.141341	CL:14189	5	3	TSG101|VPS37A|UBAP1
COMPARTMENTS	ESCRT-0 complex	0.0236	3031	0.0014	0.162709	GOCC:0033565	6	3	TSG101|HGS|VTA1
GO Biological Process	Establishment of apical/basal cell polarity	0.0178	3031	0.00066	0.174958	GO:0035089	22	5	SCRIB|MSN|FSCN1|RHOA|CDC42
GO Biological Process	Establishment of cell polarity	4.64e-06	3031	6.43e-08	0.533348	GO:0030010	127	18	RAB10|CYTH3|ARF6|CRK|LLGL1|PTK2|SCRIB|MSN|AMOT|PARD3|MAPRE1|FSCN1|ITGB1|AMOTL1|RHOA|NSFL1C|AMOTL2|CDC42
GO Biological Process	Establishment of cell polarity involved in ameboidal cell migration	0.0106	3031	0.00036	0.197469	GO:0003365	3	3	AMOT|AMOTL1|AMOTL2
GO Biological Process	Establishment of endothelial barrier	0.0029	3031	8.04e-05	0.25376	GO:0061028	33	7	RAPGEF2|EZR|MSN|AFDN|RAP1A|TJP2|RDX
GO Biological Process	Establishment of epithelial cell polarity	0.0033	3031	9.47e-05	0.248149	GO:0090162	34	7	CYTH3|ARF6|MSN|AMOT|PARD3|RHOA|CDC42
GO Biological Process	Establishment of localization	3.95e-13	3031	1.13e-15	1.24034	GO:0051234	3946	189	ARF5|RALA|SNAP29|RP2|EHD4|TBC1D17|CDC37|SNX8|YKT6|SEC61B|SLC25A11|RAB35|EXOC2|SNX17|SLC1A4|DDX39A|CANX|PMPCB|SNAP23|TSG101|NECTIN2|HIP1R|EXOC4|CCNB1|ARF3|CCT7|ITGAV|IPO5|SNX1|SLC12A2|RAB2A|PACSIN2|EHD2|NAPA|SLC9A1|EHBP1|ARCN1|CBL|CUL3|RAB10|PDCD6|RAB7A|NRP1|TNPO3|SRI|PIK3C2A|VPS37B|SCYL1|ARL8A|EGFR|VPS51|CCT5|ANK3|ZDHHC5|MYO1E|IGF2BP1|ATP5MF|BAX|ITGA2|CYTH3|INPPL1|ARF6|AXL|BCR|DDX19A|YWHAG|SEC23A…
GO Biological Process	Establishment of localization in cell	1.56e-15	3031	2.84e-18	1.48069	GO:0051649	1756	116	ARF5|SNAP29|EHD4|TBC1D17|CDC37|SNX8|YKT6|SEC61B|RAB35|EXOC2|SNX17|DDX39A|CANX|PMPCB|SNAP23|TSG101|NECTIN2|HIP1R|EXOC4|CCNB1|ARF3|IPO5|SNX1|RAB2A|EHD2|NAPA|SLC9A1|ARCN1|CBL|CUL3|RAB10|PDCD6|RAB7A|TNPO3|VPS37B|ARL8A|VPS51|MYO1E|BAX|ARF6|AXL|BCR|DDX19A|YWHAG|SEC23A|RAB1B|ARHGAP1|SRP68|VPS37A|FMN2|NUDC|LLGL1|NAPG|COPG1|AP2A2|XPOT|HGS|RAB12|RAB11B|EXOC7|EZR|PARK7|SNX18|DLG1|ITSN2|SCRIB|AP1B1|COPS5|AP2…
GO Biological Process	Establishment of organelle localization	2.21e-08	3031	1.8e-10	0.765561	GO:0051656	380	37	SNAP29|YKT6|EXOC2|SNAP23|TSG101|NECTIN2|EXOC4|CCNB1|CBL|CUL3|PDCD6|RAB7A|MYO1E|FMN2|NUDC|LLGL1|COPG1|RAB11B|EXOC7|EZR|DLG1|SCRIB|COPS5|KIF14|PARD3|MAPRE1|DNM2|WASF1|PICALM|ITGB1|RAB1A|NSFL1C|CDK5|CFL1|RAN|CTNNB1|CDC42
GO Biological Process	Establishment of protein localization	8.55e-16	3031	1.36e-18	1.5068	GO:0045184	1272	96	ARF5|RALA|SNAP29|RP2|TBC1D17|CDC37|SNX8|YKT6|SEC61B|RAB35|EXOC2|SNX17|CANX|PMPCB|SNAP23|TSG101|EXOC4|ARF3|IPO5|SNX1|RAB2A|NAPA|EHBP1|ARCN1|RAB10|PDCD6|RAB7A|TNPO3|VPS37B|ARL8A|EGFR|VPS51|ANK3|BAX|ITGA2|ARF6|BCR|YWHAG|SEC23A|RAB1B|ARHGAP1|SRP68|TCP1|VPS37A|FMN2|NAPG|COPG1|AP2A2|XPOT|HGS|RAB12|RAB11B|EXOC7|PARK7|SNX18|ATG7|SCRIB|AP1B1|AP2A1|IPO9|AFDN|KIF14|VTA1|RAB13|STXBP3|STK4|STXBP1|PARD3|OPTN|S…
GO Biological Process	Establishment of protein localization to membrane	0.0164	3031	0.0006	0.178516	GO:0090150	219	16	SEC61B|RAB10|RAB7A|VPS37B|EGFR|ANK3|BAX|SRP68|VPS37A|RAB11B|SCRIB|AFDN|PARD3|OPTN|RAB3GAP1|RDX
GO Biological Process	Establishment of protein localization to organelle	0.0347	3031	0.0015	0.145967	GO:0072594	335	20	RALA|SEC61B|PMPCB|TSG101|IPO5|RAB10|RAB7A|TNPO3|VPS37B|BAX|SRP68|VPS37A|HGS|SCRIB|IPO9|STK4|RAB3GAP1|RAN|WBP2|UBAP1
GO Biological Process	Establishment of protein localization to plasma membrane	0.0186	3031	0.00069	0.173049	GO:0061951	49	7	RAB10|RAB7A|ANK3|SCRIB|AFDN|OPTN|RDX
GO Biological Process	Establishment of vesicle localization	4.2e-05	3031	7.29e-07	0.437675	GO:0051650	169	19	SNAP29|YKT6|EXOC2|SNAP23|TSG101|EXOC4|CUL3|PDCD6|RAB7A|MYO1E|RAB11B|EXOC7|SCRIB|COPS5|DNM2|PICALM|RAB1A|CDK5|CTNNB1
GO Biological Process	Establishment or maintenance of apical/basal cell polarity	3.65e-07	3031	3.84e-09	0.643771	GO:0035088	56	14	MPP5|LLGL1|EZR|DLG1|SCRIB|MSN|DLG5|CLIC4|PARD3|FSCN1|ILK|RHOA|ERBIN|CDC42
GO Biological Process	Establishment or maintenance of cell polarity	4.55e-10	3031	2.72e-12	0.934199	GO:0007163	212	30	MPP5|ACTR3|SLC9A1|RAB10|CYTH3|ARF6|CRK|CTNNA1|LLGL1|EZR|PTK2|DLG1|SCRIB|MSN|PDLIM1|AMOT|DLG5|CLIC4|PARD3|MAPRE1|FSCN1|ITGB1|ILK|AMOTL1|RHOA|NSFL1C|AMOTL2|ERBIN|CDC42|ARHGAP35
GO Biological Process	Establishment or maintenance of epithelial cell apical/basal polarity	3.8e-05	3031	6.54e-07	0.442022	GO:0045197	51	11	MPP5|LLGL1|DLG1|SCRIB|MSN|DLG5|PARD3|ILK|RHOA|ERBIN|CDC42
STRING Clusters	Establishment or maintenance of epithelial cell apical/basal polarity, and Partitioning defective protein 6, PB1 domain	0.0134	3031	0.00024	0.18729	CL:21807	17	5	MPP5|LLGL1|SCRIB|DLG5|PARD3
KEGG Pathways	Estrogen signaling pathway	0.0075	3031	0.0017	0.212494	hsa04915	133	11	MAP2K2|EGFR|GNAQ|MAP2K1|GNAI2|PLCB1|NRAS|GNAI3|HSPA1L|SHC1|PLCB3
Reactome Pathways	Eukaryotic Translation Termination	4.89e-06	3031	1.61e-07	0.531069	HSA-72764	92	15	RPL19|RPS15A|RPS2|RPLP1|RPS3A|RPL34|GSPT1|RPL6|RPL10|RPS13|RPS4Y2|RPL9|RPS7|RPL11|RPS27
TISSUES	Excretory gland	4.09e-10	3031	8.93e-12	0.938828	BTO:0000431	1385	85	TPD52L2|AHCY|SNX8|EXOC2|CDC42EP1|GRWD1|TBRG4|BCAR3|COTL1|SLC9A1|EHBP1|TUBB4A|RAB7A|CDH6|NRP1|PFKL|ARL8A|NONO|ANK3|AKR1B1|ATP5MF|ITGB5|CTNNA1|SRP68|GNAI2|ITGA3|TUBB6|NUDC|PKM|TUFM|PPP2R1A|EIF4A2|BGN|EXOC7|EZR|PARK7|RPS2|CTSB|ANXA2|RPS3A|ATG7|PDLIM7|PLS3|KIRREL1|PCBP2|NRAS|CNN3|NEK6|CLIC4|PARD3|GDI2|SDC1|SNX9|PFDN6|SLC4A7|TKT|RHOA|SHC1|RPL6|EPN1|AFAP1|MPST|RPL10|SEPTIN7|CUL2|GPHN|PPP2R5D|AMOTL2|CFL…
STRING Clusters	Exocyst, and Golgi vesicle fusion to target membrane	0.0106	3031	0.00018	0.197469	CL:13577	26	6	RALA|EXOC2|EXOC4|RAB10|EXOC7|RAB13
GO Biological Process	Exocytic process	2.07e-05	3031	3.33e-07	0.468403	GO:0140029	71	13	SNAP29|YKT6|EXOC2|SNAP23|EXOC4|NAPA|RAB10|RAB12|EXOC7|SCRIB|RAB13|STXBP3|STXBP1
GO Cellular Component	Exocytic vesicle	0.012	3031	0.001	0.192082	GO:0070382	231	16	RAB35|RAB10|RAB7A|RAB12|RAB11B|SEPTIN6|DPYSL3|COPS5|RAB13|SEPTIN8|GIPC1|PICALM|STON1|ATP2B1|ATP6V1C1|SEPTIN2
GO Biological Process	Exocytosis	6.85e-07	3031	7.73e-09	0.616431	GO:0006887	233	26	RALA|SNAP29|YKT6|EXOC2|SNAP23|TSG101|EXOC4|NAPA|CBL|RAB10|PIK3C2A|BCR|LLGL1|RAB12|RAB11B|EXOC7|SCRIB|COPS5|RAB13|RAP1A|STXBP3|STXBP1|PPP3CB|CDK5|PIP5K1C|ARL8B
UniProt Keywords	Exocytosis	0.0415	3031	0.0041	0.138195	KW-0268	69	7	RALA|EXOC2|EXOC4|PIK3C2A|LLGL1|EXOC7|PIP5K1C
GO Biological Process	Export from cell	2.44e-07	3031	2.41e-09	0.661261	GO:0140352	461	39	RALA|SNAP29|YKT6|EXOC2|CANX|SNAP23|TSG101|EXOC4|NAPA|SLC9A1|CBL|RAB10|PIK3C2A|AXL|BCR|LLGL1|COPG1|RAB12|RAB11B|EXOC7|PARK7|SCRIB|AP1B1|COPS5|RAB13|RAP1A|STXBP3|STXBP1|NIBAN2|GIPC1|PPP3CB|ABCC1|RAB1A|ATP2B1|CDK5|SLC1A5|ATP1A1|PIP5K1C|ARL8B
COMPARTMENTS	Extracellular exosome	9.26e-18	3031	7.65e-20	1.70334	GOCC:0070062	428	55	RALA|EFNB1|NAMPT|SERPINE1|CD82|RAB35|ADGRE5|CANX|SNAP23|TSG101|LGALS3|ITGAV|RAB2A|RAB10|PDCD6|RAB7A|SRI|CDH11|BAX|ANXA5|ARF6|AXL|CSPG4|ITGA3|RAP2B|PKM|BGN|HGS|EZR|PARK7|SNX18|CTSB|ANXA2|PCBP2|MSN|VTA1|TAGLN2|NRAS|AHNAK|SDC1|FSCN1|DNM2|ITGB1|RAB2B|ABCC1|RAB1A|RHOA|SLC2A1|CFL1|SLC1A5|ACTG1|SIRPA|CTNNB1|ENO1|CDC42
GO Cellular Component	Extracellular exosome	2.98e-68	3031	4.36e-71	6.75258	GO:0070062	2096	221	ARF5|RALA|BAIAP2L1|EFNB1|PYGB|AHCY|RP2|CSK|EHD4|CDC37|NAMPT|MPP6|SERPINE1|PSMA2|AK1|ACTA2|GALK1|CD82|ARPC3|RAB35|SLC1A4|ADGRE5|VASP|CANX|SNAP23|TSG101|NECTIN2|LGALS3|PI4KA|RRAS2|ARF3|PRPH|CCT7|ITGAV|MPP5|TAOK1|AARS1|COTL1|SLC12A2|RAB2A|ACTR3|PACSIN2|EHD2|NAPA|SLC9A1|TUBB4A|CUL3|RAB10|PDCD6|RAB7A|PRKAR2A|SRI|ACAT1|PIK3C2A|IDE|VPS37B|IQGAP1|CDH11|PFKL|PGD|ARL8A|RALB|CCT6A|CCT5|QDPR|AKR1B1|GNAQ|MYO1…
GO Molecular Function	Extracellular matrix binding	0.0152	3031	0.00029	0.181816	GO:0050840	56	8	LGALS3|ITGAV|ITGA2|ITGA3|BGN|ITGB1|DAG1|ITGA7
COMPARTMENTS	Extracellular membrane-bounded organelle	6.84e-18	3031	5.35e-20	1.71649	GOCC:0065010	473	58	RALA|NAMPT|SERPINE1|ACTA2|CD82|RAB35|ADGRE5|VASP|CANX|SNAP23|TSG101|LGALS3|ITGAV|RAB10|PDCD6|RAB7A|SRI|BAX|ANXA5|ARF6|HPRT1|AXL|CSPG4|ITGA3|RAP2B|PKM|BGN|HGS|EZR|ACSL4|PARK7|SNX18|CTSB|ANXA2|MSN|VTA1|TAGLN2|NRAS|ANXA7|AHNAK|SDC1|FSCN1|DNM2|ITGB1|RAB2B|ABCC1|RAB1A|RHOA|SLC2A1|CFL1|SLC1A5|ACTG1|SIRPA|PHGDH|CTNNB1|ENO1|RDX|CDC42
COMPARTMENTS	Extracellular organelle	4.21e-19	3031	2.93e-21	1.83757	GOCC:0043230	524	63	RALA|EFNB1|NAMPT|SERPINE1|ACTA2|CD82|RAB35|ADGRE5|VASP|CANX|SNAP23|TSG101|LGALS3|ITGAV|RAB2A|RAB10|PDCD6|RAB7A|SRI|CDH11|BAX|ANXA5|ARF6|HPRT1|AXL|CSPG4|ITGA3|RAP2B|PKM|BGN|HGS|EZR|ACSL4|PARK7|SNX18|CTSB|ANXA2|PCBP2|MSN|VTA1|TAGLN2|NRAS|ANXA7|AHNAK|SDC1|FSCN1|DNM2|ITGB1|RAB2B|ABCC1|RAB1A|RHOA|SLC2A1|CFL1|SLC1A5|ACTG1|SIRPA|SERPINB6|PHGDH|CTNNB1|ENO1|RDX|CDC42
COMPARTMENTS	Extracellular region	8.96e-06	3031	2.49e-07	0.504769	GOCC:0005576	2079	97	RALA|EFNB1|NAMPT|SERPINE1|ACTA2|CD82|RAB35|ADGRE5|VASP|CANX|SNAP23|TSG101|NECTIN2|LGALS3|NOTCH2|ITGAV|RAB2A|MAP2K2|EHD2|TUBB4A|RAB10|PDCD6|RAB7A|NRP1|SRI|PIK3C2A|IDE|CDH11|CDH2|EGFR|AKR1B1|GNAQ|NRG1|CSTB|BAX|ITGB5|ANXA5|ERAP1|ARF6|HPRT1|AXL|CSPG4|ITGA3|MET|TUBB6|RAP2B|PKM|TUBB3|HNRNPM|BGN|HGS|EZR|ACSL4|PARK7|TUBB4B|SNX18|CTSB|ANXA2|EPHB4|PCBP2|MSN|CYB5R3|PHLDB1|COMT|VTA1|TAGLN2|NRAS|ANXA7|HSPA1L|…
GO Cellular Component	Extracellular region	5.87e-31	3031	4.3e-33	3.02314	GO:0005576	4175	241	ARF5|RALA|BAIAP2L1|EFNB1|PYGB|AHCY|RP2|CSK|EHD4|CDC37|NAMPT|MPP6|SERPINE1|PSMA2|AK1|ACTA2|GALK1|CD82|ARPC3|RAB35|SLC1A4|ADGRE5|VASP|CANX|SNAP23|TSG101|NECTIN2|LGALS3|PI4KA|RRAS2|NOTCH2|ARF3|PRPH|CCT7|ITGAV|MPP5|PSMD11|TAOK1|AARS1|COTL1|SLC12A2|RAB2A|MAP2K2|ACTR3|PACSIN2|EHD2|NAPA|SLC9A1|TUBB4A|CUL3|RAB10|PDCD6|RAB7A|NRP1|PRKAR2A|SRI|ACAT1|PIK3C2A|IDE|VPS37B|IQGAP1|CDH11|PFKL|PGD|ARL8A|RALB|EGFR|C…
COMPARTMENTS	Extracellular space	1.54e-09	3031	2.69e-11	0.881248	GOCC:0005615	1027	69	RALA|EFNB1|NAMPT|SERPINE1|CD82|RAB35|ADGRE5|CANX|SNAP23|TSG101|LGALS3|ITGAV|RAB2A|RAB10|PDCD6|RAB7A|NRP1|SRI|PIK3C2A|IDE|CDH11|EGFR|AKR1B1|NRG1|CSTB|BAX|ANXA5|ERAP1|ARF6|HPRT1|AXL|CSPG4|ITGA3|RAP2B|PKM|BGN|HGS|EZR|PARK7|SNX18|CTSB|ANXA2|PCBP2|MSN|COMT|VTA1|TAGLN2|NRAS|HSPA1L|AHNAK|SDC1|IL6ST|FSCN1|DNM2|ITGB1|RAB2B|ABCC1|RAB1A|RHOA|SLC2A1|CDK5|CFL1|DAG1|SLC1A5|ACTG1|SIRPA|CTNNB1|ENO1|CDC42
GO Cellular Component	Extracellular space	4.43e-42	3031	2.59e-44	4.13536	GO:0005615	3247	229	ARF5|RALA|BAIAP2L1|EFNB1|PYGB|AHCY|RP2|CSK|EHD4|CDC37|NAMPT|MPP6|SERPINE1|PSMA2|AK1|ACTA2|GALK1|CD82|ARPC3|RAB35|SLC1A4|ADGRE5|VASP|CANX|SNAP23|TSG101|NECTIN2|LGALS3|PI4KA|RRAS2|ARF3|PRPH|CCT7|ITGAV|MPP5|TAOK1|AARS1|COTL1|SLC12A2|RAB2A|ACTR3|PACSIN2|EHD2|NAPA|SLC9A1|TUBB4A|CUL3|RAB10|PDCD6|RAB7A|NRP1|PRKAR2A|SRI|ACAT1|PIK3C2A|IDE|VPS37B|IQGAP1|CDH11|PFKL|PGD|ARL8A|RALB|EGFR|CCT6A|CCT5|QDPR|AKR1B1…
COMPARTMENTS	Extracellular vesicle	2.29e-19	3031	1.49e-21	1.86402	GOCC:1903561	500	62	RALA|EFNB1|NAMPT|SERPINE1|ACTA2|CD82|RAB35|ADGRE5|VASP|CANX|SNAP23|TSG101|LGALS3|ITGAV|RAB2A|RAB10|PDCD6|RAB7A|SRI|CDH11|BAX|ANXA5|ARF6|HPRT1|AXL|CSPG4|ITGA3|RAP2B|PKM|BGN|HGS|EZR|ACSL4|PARK7|SNX18|CTSB|ANXA2|PCBP2|MSN|VTA1|TAGLN2|NRAS|ANXA7|AHNAK|SDC1|FSCN1|DNM2|ITGB1|RAB2B|ABCC1|RAB1A|RHOA|SLC2A1|CFL1|SLC1A5|ACTG1|SIRPA|PHGDH|CTNNB1|ENO1|RDX|CDC42
COMPARTMENTS	Extrinsic component of cytoplasmic side of plasma membrane	0.0012	3031	5.19e-05	0.292082	GOCC:0031234	70	10	IQGAP1|GNAQ|CYTH3|GNAI2|SNX18|FERMT2|GNAI3|SNX9|RHOA|FARP1
GO Cellular Component	Extrinsic component of cytoplasmic side of plasma membrane	0.00021	3031	1.23e-05	0.367778	GO:0031234	102	13	IQGAP1|GNAQ|CYTH3|GNAI2|PTK2|SNX18|FERMT2|FYN|GNAI3|SNX9|RHOA|YES1|FARP1
COMPARTMENTS	Extrinsic component of membrane	2.99e-06	3031	7.41e-08	0.552433	GOCC:0019898	227	24	PACSIN2|EHD2|RAB7A|CDH6|PIK3C2A|IQGAP1|CDH11|CDH2|GNAQ|CYTH3|CTNNA1|SEC23A|GNAI2|EZR|PTK2|SNX18|FERMT2|GNAI3|SNX9|PICALM|CTNND1|RHOA|FARP1|CTNNB1
GO Cellular Component	Extrinsic component of membrane	6.37e-06	3031	2.86e-07	0.519586	GO:0019898	323	28	PACSIN2|EHD2|RAB7A|CDH6|PIK3C2A|IQGAP1|CDH11|CDH2|GNAQ|CYTH3|CTNNA1|SEC23A|GNAI2|EZR|PTK2|SNX18|FERMT2|ANXA2|FYN|SCRIB|GNAI3|SNX9|PICALM|CTNND1|RHOA|YES1|FARP1|CTNNB1
COMPARTMENTS	Extrinsic component of plasma membrane	4.63e-06	3031	1.21e-07	0.533442	GOCC:0019897	118	17	CDH6|IQGAP1|CDH11|CDH2|GNAQ|CYTH3|CTNNA1|GNAI2|SNX18|FERMT2|GNAI3|SNX9|PICALM|CTNND1|RHOA|FARP1|CTNNB1
GO Cellular Component	Extrinsic component of plasma membrane	5.4e-07	3031	1.77e-08	0.626761	GO:0019897	176	22	CDH6|IQGAP1|CDH11|CDH2|GNAQ|CYTH3|CTNNA1|GNAI2|PTK2|SNX18|FERMT2|ANXA2|FYN|SCRIB|GNAI3|SNX9|PICALM|CTNND1|RHOA|YES1|FARP1|CTNNB1
GO Cellular Component	Extrinsic component of synaptic membrane	0.0438	3031	0.0044	0.135853	GO:0099243	10	3	SCRIB|PICALM|FARP1
TISSUES	Eye	6.04e-07	3031	1.59e-08	0.621896	BTO:0000439	835	54	RALA|EFNB1|AK1|ACTA2|TRAP1|TSG101|NUMBL|EFR3A|CCT7|MPP5|PDGFRB|HACD3|SLC12A2|PACSIN2|TUBB4A|RALB|NONO|VPS51|AKR1B1|CRK|RPS15A|NUDC|PKM|EXOC7|ACSL4|RPS2|CTSB|ANXA2|RPLP1|RPS3A|COPS5|PCBP2|LONP1|EPB41L2|OPTN|SLC25A6|FSCN1|GARS1|ANXA4|RPL34|SLC4A7|TKT|GDI1|RHOA|RPL6|RPL10|DDX46|CFL1|ATP1A1|ACTG1|RPL9|ENO1|RDX|MTHFD1
Monarch Phenotype	Eye measurement	0.0314	3031	0.00064	0.150307	EFO:0004731	804	39	EXOC2|ACTR3|PIK3C2A|CDH11|CDH2|RALB|RASA1|ANK3|DNAAF5|CRK|PFAS|PRMT3|RASA3|FERMT2|FILIP1L|FYN|ATP2B4|MYPN|KIRREL1|CYB5R3|TSC22D2|CDC42BPA|ARHGAP18|PKN2|DLG5|BICC1|PALM2AKAP2|MAPRE1|FAT4|STON1|AFAP1|MPST|FLNB|AMOTL2|TJP2|SLC1A5|TLN2|BCAS3|HSPA12A
InterPro Domains	Ezrin/radixin/moesin-like	0.00047	3031	1.57e-06	0.33279	IPR000798	16	7	FARP2|EPB41L1|EZR|MSN|EPB41L2|FARP1|RDX
STRING Clusters	Ezrin/radixin/moesin, and EBP50, C-terminal	0.0499	3031	0.0014	0.13019	CL:12565	6	3	EZR|MSN|RDX
Reactome Pathways	Factors involved in megakaryocyte development and platelet production	0.0137	3031	0.0018	0.186328	HSA-983231	155	12	EHD2|TUBB4A|PRKAR2A|DOCK11|TUBB6|TUBB3|TUBB4B|CDK5|TUBA1C|EHD1|DOCK10|CDC42
WikiPathways	Fatty Acids and Lipoproteins Transport in Hepatocytes	1.54e-06	3031	2.37e-08	0.581248	WP5323	380	33	EHD4|HIP1R|PACSIN2|EHD2|EHBP1|RAB7A|ACAT1|PIK3C2A|MYO1E|INPPL1|AP2A2|SNX18|ITSN2|AP2A1|CYB5R3|NSDHL|SNX2|DNM2|SNX9|PICALM|STON1|SH3BP4|RAB1A|NECAP2|REPS1|FCHO2|EPN1|FNBP1|CLINT1|PIP5K1C|EHD1|WASF2|CDC42
Reactome Pathways	Fatty Acids bound to GPR40 (FFAR1) regulate insulin secretion	0.0189	3031	0.0027	0.172354	HSA-434316	8	3	GNAQ|PLCB1|PLCB3
Reactome Pathways	FBXL7 down-regulates AURKA during mitotic entry and in early mitosis	0.0095	3031	0.0012	0.202228	HSA-8854050	54	7	PSMC4|PSMD10|PSMA2|PSMC1|PSMD11|PSMD12|PSME1
KEGG Pathways	T cell receptor signaling pathway	0.00036	3031	4.51e-05	0.34437	hsa04660	100	12	PLCG1|MAP2K2|MAP2K1|PAK2|DLG1|FYN|MAP3K7|NRAS|CHUK|PPP3CB|RHOA|CDC42
KEGG Pathways	Fc gamma R-mediated phagocytosis	2.2e-06	3031	1.25e-07	0.565758	hsa04666	90	15	ARPC3|PLCG1|VASP|INPPL1|ARF6|CRK|MAP2K1|DNM2|WASF1|ARPC1B|MYO10|CFL1|PIP5K1C|WASF2|CDC42
Reactome Pathways	FCERI mediated NF-kB activation	0.0021	3031	0.00017	0.267778	HSA-2871837	82	10	PSMC4|TAB1|PSMD10|PSMA2|PSMC1|PSMD11|PSMD12|MAP3K7|CHUK|PSME1
GO Molecular Function	Virus receptor activity	0.00028	3031	3.74e-06	0.355284	GO:0001618	76	12	NECTIN2|ITGAV|IDE|EGFR|ITGA5|ITGB5|ITGA2|AXL|EPHA2|ITGB1|DAG1|SLC1A5
Reactome Pathways	FCGR3A-mediated phagocytosis	1.5e-08	3031	1.98e-10	0.782391	HSA-9664422	62	16	ARPC3|ACTR3|ABI2|CRK|PTK2|FYN|NCKAP1|ABI1|WASF1|ARPC1B|MYO10|ACTG1|YES1|CYFIP1|WASF2|CDC42
Monarch Phenotype	Feeding difficulties	0.008	3031	0.00011	0.209691	HP:0011968	947	47	AIMP2|GALK1|SLC1A4|PMPCB|PI4KA|RRAS2|MPP5|TAOK1|AARS1|SLC12A2|MAP2K2|ARCN1|CBL|NONO|VPS51|MAP2K1|YWHAG|FMN2|UGDH|TUBB3|PPP2R1A|RAB11B|EPB41L1|EZR|PSMD12|GMPPA|MYPN|LONP1|NHLRC2|MAP3K7|NRAS|RARS2|GNAI3|STXBP1|ITPA|WASF1|ASNS|FAT4|RAB3GAP1|EIF2B1|GPHN|ITGA7|ACTG1|PHGDH|CASK|TPM2|EIF4A3
TISSUES	Female reproductive gland	6.42e-16	3031	8.47e-18	1.51925	BTO:0000254	3017	163	RANBP9|PSMC4|TPD52L2|AHCY|RPL19|EXOC2|SNX17|DDX39A|PLCG1|TRAP1|CANX|CDC42EP1|SNAP23|CNN1|EXOC4|ARF3|CCT7|BCAR3|ITGAV|IPO5|ANKRD13A|HACD3|SNX1|COTL1|MAP2K2|NAPA|PPP1R12C|FARP2|TUBB4A|CUL3|PDCD6|RAB7A|NRP1|TNPO3|PRKAR2A|IDE|PXN|CDH2|SCYL1|RASA1|NONO|VPS51|CCT5|SH3RF1|RPN1|ANXA5|ERAP1|CTNNA1|SEC23A|SRP68|GNAI2|ITGA3|TCP1|TUBB6|PKM|PPP2R1A|RIC8A|EIF4A2|AP2A2|EXOC7|RASA3|ACSL4|SEPTIN6|RPS2|MAP4K4|CTSB…
TISSUES	Female reproductive system	2.11e-49	3031	3.47e-52	4.86757	BTO:0000083	6111	342	BAIAP2L1|RANBP9|PSMC4|EFNB1|TPD52L2|AHCY|PSMD10|CSK|TBC1D17|CDC37|AIMP2|SERPINE1|PSMA2|ACTA2|RPL19|SLC25A11|LRRC59|RAB35|EXOC2|SNX17|SLC1A4|DDX39A|ADGRE5|PLCG1|TRAP1|CANX|CDC42EP1|PMPCB|SNAP23|TSG101|CNN1|NECTIN2|EXOC4|WDR44|LGALS3|EFR3A|PI4KA|RRAS2|CCNB1|NOTCH2|ARF3|CCT7|TBRG4|BCAR3|ITGAV|IPO5|TAOK1|ANKRD13A|AARS1|HACD3|SNX1|COTL1|RAB2A|MAP2K2|ACTR3|PACSIN2|EHD2|NAPA|PPP1R12C|SLC9A1|EHBP1|ARCN1|…
SMART Domains	FERM adjacent (FA)	0.0338	3031	0.0009	0.147108	SM01195	13	4	FARP2|EPB41L1|EPB41L2|FARP1
SMART Domains	FERM C-terminal PH-like domain	5.21e-05	3031	3.17e-07	0.428316	SM01196	27	9	FARP2|EPB41L1|EZR|FRMD6|MSN|PTPN14|EPB41L2|FARP1|RDX
InterPro Domains	FERM central domain	1.06e-06	3031	8.82e-10	0.597469	IPR019748	49	14	FARP2|EPB41L1|EZR|PTK2|FERMT2|FRMD6|MSN|PTPN14|EPB41L2|MYO10|TLN2|FARP1|RDX|JAK1
InterPro Domains	FERM conserved site	6.69e-05	3031	1.4e-07	0.417457	IPR019747	24	9	FARP2|EPB41L1|EZR|MSN|PTPN14|EPB41L2|TLN2|FARP1|RDX
InterPro Domains	FERM domain	4e-06	3031	6.12e-09	0.539794	IPR000299	48	13	FARP2|EPB41L1|EZR|PTK2|FRMD6|MSN|PTPN14|EPB41L2|MYO10|TLN2|FARP1|RDX|JAK1
InterPro Domains	FERM superfamily, second domain	1.13e-06	3031	1.1e-09	0.594692	IPR035963	50	14	FARP2|EPB41L1|EZR|PTK2|FERMT2|FRMD6|MSN|PTPN14|EPB41L2|MYO10|TLN2|FARP1|RDX|JAK1
InterPro Domains	FERM, C-terminal PH-like domain	0.00012	3031	3.17e-07	0.392082	IPR018980	27	9	FARP2|EPB41L1|EZR|FRMD6|MSN|PTPN14|EPB41L2|FARP1|RDX
InterPro Domains	FERM, N-terminal	0.00012	3031	3.17e-07	0.392082	IPR018979	27	9	FARP2|EPB41L1|EZR|FRMD6|MSN|PTPN14|EPB41L2|FARP1|RDX
InterPro Domains	FERM/acyl-CoA-binding protein superfamily	4.08e-05	3031	7.39e-08	0.438934	IPR014352	50	12	FARP2|EPB41L1|EZR|PTK2|FRMD6|MSN|PTPN14|EPB41L2|MYO10|TLN2|FARP1|RDX
SMART Domains	Fes/CIP4 homology domain	0.0207	3031	0.00045	0.168403	SM00055	20	5	PACSIN2|SRGAP1|FCHO2|FNBP1|SRGAP2C
TISSUES	Fetus	2.42e-26	3031	2e-28	2.56162	BTO:0000449	1318	117	EFNB1|AHCY|PSMD10|CDC37|SERPINE1|ACTA2|SNX17|ADGRE5|CANX|SNAP23|TSG101|CNN1|CCNB1|ARF3|AARS1|COTL1|EHD2|NAPA|SLC9A1|TUBB4A|PDCD6|RAB7A|PXN|IQGAP1|RASA1|EGFR|NONO|AKR1B1|GNAQ|ITGA5|ANXA5|CYTH3|CRK|CTNNA1|MMP14|RAB1B|RPS15A|PKM|TUFM|PPP2R1A|HNRNPM|EIF4A2|BGN|EXOC7|EZR|ACSL4|PTK2|RPS2|FERMT2|CTSB|ANXA2|RPLP1|RPS3A|ATG7|FYN|PLS3|ATP5F1C|COPS5|MSN|MYLK|CYB5R3|COMT|TAGLN2|MPP1|RARS2|CNN3|PDLIM1|AMOT|EI…
TISSUES	Fibroblast	0.0188	3031	0.00076	0.172584	BTO:0000452	224	16	CANX|AXL|ABR|ITGA3|FERMT2|TPM1|CALD1|TIPRL|ANXA7|SDC1|PSME1|TAGLN|SH3BP4|SHC1|SERPINH1|TPM2
GO Cellular Component	ficolin-1-rich granule	0.0016	3031	0.0001	0.279588	GO:0101002	185	16	PSMA2|LGALS3|PSMD11|COTL1|PFKL|ARL8A|CSTB|PKM|AP2A2|CTSB|ATG7|PSMD12|RHOA|CAND1|SIRPA|SERPINB6
COMPARTMENTS	ficolin-1-rich granule lumen	0.0476	3031	0.0032	0.132239	GOCC:1904813	124	10	PSMA2|PSMD11|COTL1|PFKL|CSTB|PKM|CTSB|ATG7|PSMD12|CAND1
GO Cellular Component	ficolin-1-rich granule lumen	0.0335	3031	0.0032	0.147496	GO:1904813	124	10	PSMA2|PSMD11|COTL1|PFKL|CSTB|PKM|CTSB|ATG7|PSMD12|CAND1
COMPARTMENTS	Filamentous actin	0.0012	3031	5.13e-05	0.292082	GOCC:0031941	20	6	EHBP1|DPYSL3|NCKAP1|PDLIM1|CFL1|ACTG1
GO Cellular Component	Filamentous actin	0.004	3031	0.00029	0.239794	GO:0031941	29	6	EHBP1|DPYSL3|PDLIM7|NCKAP1|PDLIM1|ACTG1
COMPARTMENTS	Filopodium	1.16e-09	3031	1.91e-11	0.893554	GOCC:0030175	61	17	VASP|ITGAV|ABI2|ARF6|ITGA3|TUBB3|EZR|MSN|UTRN|ABI1|FSCN1|ITGB1|MYO10|DAG1|PPP1R9B|RDX|CDC42
GO Cellular Component	Filopodium	3.9e-12	3031	8e-14	1.14089	GO:0030175	107	24	ACTA2|VASP|ITGAV|IGF2BP1|ABI2|INPPL1|ARF6|ITGA3|TUBB3|EZR|AP2A1|MSN|UTRN|ABI1|FSCN1|ITGB1|CDK5|MYO10|DAG1|PPP1R9B|CYFIP1|FARP1|RDX|CDC42
TISSUES	Filopodium	0.0091	3031	0.00036	0.204096	BTO:0002612	3	3	FSCN1|RHOA|CDC42
COMPARTMENTS	Filopodium membrane	0.00038	3031	1.35e-05	0.342022	GOCC:0031527	15	6	VASP|ITGAV|ARF6|ITGA3|UTRN|MYO10
GO Cellular Component	Filopodium membrane	0.00051	3031	3.14e-05	0.329243	GO:0031527	18	6	VASP|ITGAV|ARF6|ITGA3|UTRN|MYO10
GO Cellular Component	Filopodium tip	0.0048	3031	0.00037	0.231876	GO:0032433	19	5	ABI2|AP2A1|ABI1|MYO10|CYFIP1
GO Cellular Component	Flemming body	0.0015	3031	9.47e-05	0.282391	GO:0090543	34	7	RALA|EXOC2|TSG101|EXOC4|ARF6|EXOC7|KIF14
GO Cellular Component	Flotillin complex	0.004	3031	0.0003	0.239794	GO:0016600	9	4	CBL|CTNNA1|CORO1C|CTNNB1
KEGG Pathways	Fluid shear stress and atherosclerosis	0.0361	3031	0.0118	0.144249	hsa05418	129	9	ITGAV|NQO1|PTK2|MAP3K7|CHUK|SDC1|RHOA|ACTG1|CTNNB1
COMPARTMENTS	Focal adhesion	2.3e-39	3031	6.74e-42	3.86383	GOCC:0005925	269	70	RALA|ARPC3|ADGRE5|VASP|CDC42EP1|SNAP23|CNN1|NECTIN2|RRAS2|BCAR3|ITGAV|PDGFRB|MAP2K2|ACTR3|PACSIN2|SLC9A1|RAB10|NRP1|PXN|IQGAP1|CDH2|EGFR|ITGA5|ITGB5|ANXA5|ITGA2|ARF6|MAP2K1|CTNNA1|YWHAG|MMP14|SRP68|CSPG4|ITGA3|LASP1|NEXN|EZR|PTK2|FERMT2|MAP4K4|PDLIM7|EPHA2|MSN|NCKAP1|CNN3|PDLIM1|MAPRE1|AHNAK|NHS|DNM2|ITGB1|ILK|AKAP12|PPP1R12A|ARPC1B|CORO1C|RHOA|AFAP1|FLNB|CFL1|DAG1|PEAK1|TLN2|CNN2|YES1|PIP5K1C|CT…
GO Cellular Component	Focal adhesion	9.27e-48	3031	4.98e-50	4.70329	GO:0005925	416	92	RALA|RPL19|ARPC3|ADGRE5|VASP|CDC42EP1|SNAP23|CNN1|NECTIN2|PI4KA|RRAS2|BCAR3|ITGAV|PDGFRB|HACD3|AJUBA|MAP2K2|ACTR3|PACSIN2|SLC9A1|CBL|RAB10|NRP1|PRKAR2A|PXN|IQGAP1|CDH2|EGFR|ITGA5|ITGB5|ANXA5|ITGA2|ARF6|MAP2K1|CTNNA1|YWHAG|MMP14|SRP68|CSPG4|ITGA3|LASP1|NEXN|EZR|PTK2|RPS2|FERMT2|MAP4K4|RPLP1|RPS3A|PDLIM7|EPHA2|PCBP2|MPZL1|MSN|NCKAP1|EPB41L2|CNN3|PDLIM1|MAPRE1|AHNAK|NHS|GDI2|DNM2|WASF1|ITGB1|ILK|AKA…
KEGG Pathways	Focal adhesion	2.16e-11	3031	4.02e-13	1.06655	hsa04510	195	30	VASP|ITGAV|PDGFRB|PPP1R12C|EGFR|ITGA5|ITGB5|ITGA2|CRK|MAP2K1|PAK2|ITGA3|MET|PTK2|FYN|MYLK|RAP1A|ITGB1|ILK|PPP1R12A|RHOA|SHC1|FLNB|ITGA7|TLN2|ACTG1|PIP5K1C|CTNNB1|CDC42|ARHGAP35
WikiPathways	Focal adhesion	1.93e-11	3031	7.42e-14	1.07144	WP306	195	31	VASP|ITGAV|PDGFRB|PPP1R12C|PXN|EGFR|ITGA5|ITGB5|ITGA2|CRK|MAP2K1|PAK2|ITGA3|MET|PTK2|FYN|MYLK|RAP1A|ITGB1|ILK|PPP1R12A|RHOA|SHC1|FLNB|ITGA7|TLN2|ACTG1|PIP5K1C|CTNNB1|CDC42|ARHGAP35
GO Biological Process	Focal adhesion assembly	0.0013	3031	3.25e-05	0.288606	GO:0048041	28	7	AJUBA|ITGA2|BCR|FERMT2|STON1|PTPRK|PEAK1
WikiPathways	Focal adhesion: PI3K-Akt-mTOR-signaling pathway	0.00019	3031	7.62e-06	0.372125	WP3932	301	24	CDC37|ITGAV|PDGFRB|RAB2A|MAP2K2|RAB10|PIK3C2A|EGFR|ITGA5|ITGB5|ITGA2|MAP2K1|ITGA3|MET|PPP2R1A|RAB11B|PTK2|EPHA2|NRAS|ITGB1|SLC2A1|PPP2R5D|ITGA7|JAK1
Reactome Pathways	Folding of actin by CCT/TriC	0.00046	3031	3.19e-05	0.333724	HSA-390450	10	5	CCT7|CCT6A|CCT5|TCP1|CCT4
TISSUES	Forebrain	0.007	3031	0.00026	0.21549	BTO:0000478	1534	66	PSMD10|RPL19|SLC1A4|VASP|LGALS3|RAB2A|SCYL1|ARL8A|RALB|ANK3|AKR1B1|GNAQ|NRG1|RPN1|INPPL1|ABR|CTNNA1|DNAJA2|BASP1|NQO1|MPDZ|EPB41L1|PARK7|TP53BP2|PLS3|GMFB|MYLK|COMT|IPO9|CALD1|AFDN|MPP1|STXBP3|CNN3|CMPK1|STXBP1|PIP4K2A|ACOT7|AHNAK|EIF1AX|GARS1|PKP4|TAGLN3|RAB2B|ATP2B1|NFIC|DDOST|GPHN|PPP2R5D|TXNRD1|RAN|PRAF2|RSL1D1|SIRPA|PPP1R9B|YAP1|ARL8B|SEPTIN2|CSDE1|UBAP1|CTNNB1|RDX|PCMT1|CAPN5|MTHFD1|AMPD2
GO Biological Process	Forebrain development	0.00041	3031	9.06e-06	0.338722	GO:0030900	391	28	NUMBL|MPP5|RAPGEF2|NRP1|CDH2|EGFR|NRG1|IGF2BP1|BAX|HPRT1|CRK|AXL|PLCB1|FYN|ATP2B4|KIF14|GART|PLXNA1|FAT4|EPHB2|RHOA|RAB3GAP1|SLC2A1|CDK5|SRGAP2C|PPP1R9B|CTNNB1|ARHGAP35
Reactome Pathways	Formation of a pool of free 40S subunits	1.15e-05	3031	4.2e-07	0.49393	HSA-72689	100	15	RPL19|RPS15A|RPS2|RPLP1|RPS3A|EIF1AX|RPL34|RPL6|RPL10|RPS13|RPS4Y2|RPL9|RPS7|RPL11|RPS27
GO Biological Process	Formation of primary germ layer	0.002	3031	5.36e-05	0.269897	GO:0001704	119	13	EXOC4|ITGAV|ITGA5|ITGB5|ITGA2|MAP2K1|MMP14|ITGA3|EPHA2|ITGB1|TXNRD1|ITGA7|CTNNB1
Reactome Pathways	Formation of the ternary complex, and subsequently, the 43S complex	0.00043	3031	2.82e-05	0.336653	HSA-72695	51	9	RPS15A|RPS2|RPS3A|EIF2S2|EIF1AX|RPS13|RPS4Y2|RPS7|RPS27
Reactome Pathways	Formation of tubulin folding intermediates by CCT/TriC	7.44e-07	3031	1.7e-08	0.612843	HSA-389960	25	10	CCT7|TUBB4A|CCT6A|CCT5|TCP1|TUBB6|TUBB3|TUBB4B|CCT4|TUBA1C
WikiPathways	Fragile X syndrome	0.009	3031	0.00083	0.204576	WP4549	121	11	PLCG1|MAP2K2|MAP2K1|PLCB1|FYN|AP2A1|DNM2|SHC1|GPHN|DAG1|CYFIP1
Reactome Pathways	Free fatty acids regulate insulin secretion	0.0053	3031	0.00054	0.227572	HSA-400451	11	4	GNAQ|PLCB1|ACSL4|PLCB3
Reactome Pathways	Frs2-mediated activation	0.0401	3031	0.0068	0.139686	HSA-170968	12	3	MAP2K2|MAP2K1|RAP1A
GO Molecular Function	G protein activity	1.15e-08	3031	9.55e-11	0.79393	GO:0003925	40	14	RALA|RAB10|RAB7A|RALB|ARF6|RAB1B|RAP2B|RAB11B|NRAS|RAP1A|RAB1A|RHOA|ARL8B|CDC42
WikiPathways	G protein signaling pathways	0.0047	3031	0.00037	0.23279	WP35	91	10	SLC9A1|PRKAR2A|GNAQ|GNAI2|ARHGEF1|NRAS|GNAI3|AKAP12|RHOA|PLCB3
Reactome Pathways	G-protein mediated events	0.0327	3031	0.0052	0.148545	HSA-112040	54	6	PRKAR2A|GNAQ|GNAI2|PLCB1|GNAI3|PLCB3
WikiPathways	G13 signaling pathway	0.00046	3031	2.2e-05	0.333724	WP524	37	8	IQGAP1|SH3RF1|ARHGEF1|PIP4K2A|RHOA|CFL1|CYFIP1|CDC42
Reactome Pathways	G2/M Transition	0.00011	3031	5.06e-06	0.395861	HSA-69275	195	19	PSMC4|PSMD10|PSMA2|CCNB1|PSMC1|PSMD11|AJUBA|TUBB4A|YWHAG|TUBB6|TUBB3|PPP2R1A|TUBB4B|PSMD12|MAPRE1|OPTN|PSME1|PPP1R12A|TUBA1C
KEGG Pathways	Gap junction	1.57e-06	3031	8.4e-08	0.58041	hsa04540	87	15	PDGFRB|MAP2K2|TUBB4A|EGFR|GNAQ|MAP2K1|GNAI2|TUBB6|TUBB3|PLCB1|TUBB4B|NRAS|GNAI3|TUBA1C|PLCB3
Reactome Pathways	Gap junction trafficking	0.0059	3031	0.00062	0.222915	HSA-190828	48	7	TUBB4A|TUBB6|TUBB3|TUBB4B|DNM2|TUBA1C|ACTG1
KEGG Pathways	Gastric acid secretion	0.00045	3031	5.78e-05	0.334679	hsa04971	71	10	SLC9A1|GNAQ|GNAI2|PLCB1|EZR|MYLK|GNAI3|PLCB3|ATP1A1|ACTG1
KEGG Pathways	Gastric cancer	0.0297	3031	0.0092	0.152724	hsa05226	146	10	DVL2|MAP2K2|EGFR|BAX|MAP2K1|CTNNA1|MET|NRAS|SHC1|CTNNB1
WikiPathways	Gastrin signaling pathway	1.01e-06	3031	1.29e-08	0.599568	WP4659	113	18	SERPINE1|PLCG1|SLC9A1|PXN|EGFR|GNAQ|CRK|MAP2K1|PTK2|ANXA2|FYN|CHUK|ITGB1|RHOA|SHC1|YES1|CTNNB1|CDC42
TISSUES	Gastrointestinal tract	7.68e-10	3031	1.74e-11	0.911464	BTO:0000511	1816	101	DVL2|PYGB|PSMA2|AK1|ACTA2|RPL19|CD82|CANX|CNN1|HIP1R|CCNB1|CCT7|HACD3|COTL1|SLC12A2|ACTR3|TUBB4A|PDCD6|TNPO3|SRI|CCT6A|NONO|CCT5|AKR1B1|NRG1|ANXA5|CTNNA1|DDX19A|YWHAG|TCP1|NQO1|PKM|TUBB3|CTNNAL1|TUFM|PPP2R1A|LASP1|EIF4A2|PLS1|EZR|ACSL4|PARK7|RPS2|DPYSL3|CTSB|ANXA2|RPLP1|RPS3A|TPM1|MYLK|CALD1|NHLRC2|CMPK1|ACOT7|AHNAK|SNX2|ITPA|GDI2|SLC25A6|FSCN1|TAGLN|TAGLN3|ITGB1|ILK|RAB1A|PPP1R12A|TKT|ATP2B1|GDI…
GO Biological Process	Gastrulation	0.00012	3031	2.46e-06	0.392082	GO:0007369	167	18	DVL2|EXOC4|ITGAV|CUL3|ITGA5|ITGB5|ITGA2|MAP2K1|MMP14|ITGA3|UGDH|RIC8A|EPHA2|AMOT|ITGB1|TXNRD1|ITGA7|CTNNB1
GO Molecular Function	GDP binding	2.02e-08	3031	1.76e-10	0.769465	GO:0019003	72	17	RALA|RAB35|RRAS2|RAB2A|RAB10|RAB7A|RALB|ARF6|RAP2B|RAB12|RAB11B|NRAS|RAP1A|GNAI3|RHOA|RAN|ARL8B
Reactome Pathways	Gene and protein expression by JAK-STAT signaling after Interleukin-12 stimulation	6.56e-05	3031	2.93e-06	0.41831	HSA-8950505	37	9	RALA|PAK2|TCP1|ANXA2|MSN|CFL1|CNN2|MTAP|CDC42
Monarch Phenotype	Generalized hypotonia	0.0037	3031	3.61e-05	0.24318	HP:0001290	956	49	EFNB1|SLC1A4|PMPCB|MPP5|AARS1|SLC12A2|CBL|NONO|VPS51|ANK3|INPPL1|HPRT1|YWHAG|ACAD9|FMN2|UGDH|PPP2R1A|RAB11B|EZR|PSMD12|AP1B1|GMPPA|MYPN|LONP1|KIF14|NRAS|RARS2|GNAI3|NSDHL|DPM1|STXBP1|DNM2|GARS1|WASF1|FAT4|TKT|GDI1|DDOST|RPL10|EIF2B1|GPHN|PPP2R5D|SERPINH1|DAG1|ADSL|CASK|CTNNB1|TPM2|CDC42
GO Biological Process	Generation of neurons	6.65e-11	3031	3.22e-13	1.01772	GO:0048699	1131	78	EFNB1|RAB35|VASP|NUMBL|NOTCH2|MPP5|TAOK1|NAPA|FARP2|RAPGEF2|RAB10|NRP1|IQGAP1|CDH11|SCYL1|ANK3|SH3RF1|NRG1|IGF2BP1|BAX|HPRT1|COPS2|CRK|AXL|MAP2K1|CTNNA1|PAK2|ITGA3|CPNE1|MET|UGDH|TUBB3|LLGL1|PRMT3|NEXN|PLS1|ACSL4|PTK2|MAP4K4|DPYSL3|FYN|MINK1|SCRIB|EPHB4|EPHA2|MYPN|PLXNB2|PTPRF|NCKAP1|RAB13|TPBG|STXBP1|NIBAN2|PARD3|ABI1|DNM2|WASF1|PICALM|PLXNA1|PPP3CB|ITGB1|EPHB2|TPRN|NFATC4|SLC4A7|RHOA|CDK5|TENM3…
WikiPathways	Genes controlling nephrogenesis	0.0045	3031	0.00034	0.234679	WP4823	43	7	NOTCH2|PDGFRB|ITGA3|KIRREL1|ITGB1|ILK|CTNNB1
TISSUES	Gland	1.39e-49	3031	1.72e-52	4.8857	BTO:0000522	7004	369	BAIAP2L1|DVL2|RANBP9|PSMC4|SNAP29|TAB1|PYGB|TPD52L2|AHCY|PSMD10|CDC37|NAMPT|SNX8|SERPINE1|PSMA2|YKT6|SEC61B|AK1|ACTA2|RPL19|GALK1|SLC25A11|LRRC59|CD82|ARPC3|EXOC2|SNX17|DDX39A|ADGRE5|PLCG1|VASP|TRAP1|CANX|CDC42EP1|PMPCB|SNAP23|CNN1|NECTIN2|HIP1R|GRWD1|EXOC4|PI4KA|ARF3|CCT7|TBRG4|BCAR3|ITGAV|PSMC1|IPO5|PSMD11|TAOK1|ANKRD13A|AARS1|HACD3|SNX1|COTL1|AJUBA|MAP2K2|ACTR3|PACSIN2|EHD2|NAPA|PPP1R12C|SLC9A…
GO Biological Process	Gland development	0.0426	3031	0.0019	0.137059	GO:0048732	419	23	NOTCH2|MAP2K2|CUL3|NRP1|ACAT1|EGFR|NRG1|BAX|ITGA2|ARF6|STAT6|MAP2K1|MET|SCRIB|EPHA2|MSN|IQGAP3|APRT|PLXNA1|MPST|DAG1|CTNNB1|ARHGAP35
GO Biological Process	Gland morphogenesis	0.008	3031	0.00026	0.209691	GO:0022612	104	11	NOTCH2|CUL3|NRP1|EGFR|BAX|STAT6|SCRIB|EPHA2|MSN|PLXNA1|DAG1
Reactome Pathways	GLI3 is processed to GLI3R by the proteasome	0.014	3031	0.0018	0.185387	HSA-5610785	59	7	PSMC4|PSMD10|PSMA2|PSMC1|PSMD11|PSMD12|PSME1
GO Biological Process	Glial cell migration	0.0138	3031	0.00049	0.186012	GO:0008347	46	7	RRAS2|MMP14|CSPG4|SCRIB|CDK5|SRGAP2C|CTNNB1
WikiPathways	Glioblastoma signaling pathways	0.008	3031	0.00072	0.209691	WP2261	82	9	PLCG1|PDGFRB|MAP2K2|CBL|PIK3C2A|EGFR|MAP2K1|MET|NRAS
GO Biological Process	Gliogenesis	0.0092	3031	0.0003	0.203621	GO:0042063	248	18	CSK|RRAS2|MPP5|CDH2|NRG1|MAP2K1|MMP14|CSPG4|SCRIB|PARD3|ILK|RHOA|EIF2B1|CDK5|DAG1|SRGAP2C|PHGDH|CTNNB1
KEGG Pathways	Glioma	0.0059	3031	0.0012	0.222915	hsa05214	71	8	PLCG1|PDGFRB|MAP2K2|EGFR|BAX|MAP2K1|NRAS|SHC1
Monarch Phenotype	Global developmental delay	0.0003	3031	1.33e-06	0.352288	HP:0001263	1559	76	EFNB1|SNAP29|AHCY|SLC1A4|PMPCB|PI4KA|RRAS2|MPP5|AARS1|SLC12A2|MAP2K2|CBL|PIK3C2A|CDH11|CDH2|SCYL1|NONO|VPS51|QDPR|RPIA|HPRT1|MAP2K1|YWHAG|VPS37A|FMN2|UGDH|TUBB3|PPP2R1A|FTSJ1|RAB11B|EXOC7|EZR|ACSL4|PSMD12|AP1B1|ANKLE2|GMPPA|LONP1|CYB5R3|KIF14|NHLRC2|NRAS|RARS2|GNAI3|NSDHL|DPM1|STXBP1|FGD1|ITPA|ASNS|FAT4|PPP1R12A|TKT|GDI1|DDOST|RAB3GAP1|RPL10|EIF2B1|SLC2A1|GPHN|PPP2R5D|FLNB|TENM3|DAG1|PLCB3|ATP1A1…
KEGG Pathways	Glucagon signaling pathway	0.0107	3031	0.0026	0.197062	hsa04922	100	9	PYGB|PFKL|GNAQ|PKM|PLCB1|PPP3CB|SLC2A1|PRKAB1|PLCB3
GO Cellular Component	Glutamatergic synapse	4.84e-07	3031	1.56e-08	0.631515	GO:0098978	334	31	CANX|PACSIN2|NAPA|NRP1|CDH11|NRG1|ARF6|BCR|ABR|PAK2|PPP2R1A|PLCB1|DLG1|SCRIB|ATP2B4|RAP1A|STXBP1|DNM2|GIPC1|PPP3CB|ITGB1|CTNND1|EPHB2|ATP2B1|RHOA|CDK5|ERBIN|DAG1|FARP1|EPS8|EIF4A3
UniProt Keywords	Glutamine amidotransferase	0.0359	3031	0.0035	0.144491	KW-0315	9	3	PFAS|ASNS|GMPS
GO Biological Process	Glycolytic process through glucose-6-phosphate	0.0092	3031	0.0003	0.203621	GO:0061620	18	5	GALK1|PFKL|PKM|ENO3|ENO1
GO Biological Process	GMP biosynthetic process	0.00044	3031	9.89e-06	0.335655	GO:0006177	14	6	HPRT1|PFAS|APRT|GART|GMPS|ADSL
GO Biological Process	GMP metabolic process	2.38e-06	3031	3.07e-08	0.562342	GO:0046037	27	10	HPRT1|PFAS|DLG1|MPP1|APRT|GART|GMPS|TJP2|ADSL|CASK
KEGG Pathways	GnRH secretion	0.032	3031	0.0102	0.149485	hsa04929	63	6	MAP2K2|GNAQ|MAP2K1|PLCB1|NRAS|PLCB3
KEGG Pathways	GnRH signaling pathway	0.0055	3031	0.0011	0.225964	hsa04912	87	9	MAP2K2|EGFR|GNAQ|MAP2K1|MMP14|PLCB1|NRAS|PLCB3|CDC42
COMPARTMENTS	Golgi apparatus	0.0158	3031	0.00088	0.180134	GOCC:0005794	931	43	SNAP29|YKT6|SNX17|WDR44|ARF3|MAP2K2|ARCN1|CBL|RAB10|PIK3C2A|SCYL1|VPS51|ANK3|CYTH3|INPPL1|MAP2K1|MMP14|RAB1B|CSPG4|LLGL1|COPG1|BGN|FMNL3|DLG1|MINK1|AP1B1|AP2A1|RAB13|NRAS|OPTN|SDC1|DNM2|SNX9|ARAP1|RAB2B|RAB1A|TBC1D5|CLINT1|PARP10|DAG1|YES1|COPE|CDC42
GO Cellular Component	Golgi apparatus	2.74e-06	3031	1.14e-07	0.556225	GO:0005794	1650	83	ARF5|SNAP29|RP2|YKT6|SNX17|WDR44|RRAS2|NOTCH2|ARF3|MPP5|PDGFRB|SNX1|RAB2A|AJUBA|MAP2K2|ARCN1|CBL|CUL3|RAB10|RAB7A|PIK3C2A|SCYL1|EGFR|VPS51|ANK3|SH3RF1|GNAQ|ITGA5|CYTH3|INPPL1|ARF6|MAP2K1|SEC23A|MMP14|RAB1B|CSPG4|DNMBP|TCP1|NUDC|LLGL1|NAPG|COPG1|BGN|RAB12|ATP11C|RAB11B|FMNL3|DLG1|MINK1|AP1B1|AP2A1|RAB13|NRAS|GNAI3|NCS1|FGD1|MAPRE1|OPTN|NHS|GDI2|SDC1|DNM2|SNX9|PICALM|ARAP1|RAB2B|EPHB2|RAB1A|GDI1|TB…
UniProt Keywords	Golgi apparatus	0.0315	3031	0.003	0.150169	KW-0333	879	39	ARF5|SNAP29|YKT6|WDR44|ARF3|MPP5|SNX1|RAB2A|ARCN1|CBL|CUL3|RAB10|PIK3C2A|SCYL1|EGFR|VPS51|ANK3|SH3RF1|ARF6|DNMBP|LLGL1|COPG1|RAB12|MINK1|AP1B1|RAB13|NRAS|NCS1|MAPRE1|OPTN|SNX9|PICALM|ARAP1|RAB2B|RAB1A|GDI1|NSFL1C|COPE|SH3GLB1
Reactome Pathways	Golgi Associated Vesicle Biogenesis	0.00074	3031	5.42e-05	0.313077	HSA-432722	56	9	HIP1R|NAPA|PIK3C2A|AP1B1|SNX2|DNM2|SNX9|PICALM|CLINT1
Reactome Pathways	Golgi Cisternae Pericentriolar Stack Reorganization	0.0095	3031	0.0011	0.202228	HSA-162658	14	4	CCNB1|RAB2A|RAB1B|RAB1A
GO Biological Process	Golgi to plasma membrane transport	0.0264	3031	0.0011	0.15784	GO:0006893	53	7	EXOC2|EXOC4|RAB10|ANK3|LLGL1|OPTN|DNM2
GO Biological Process	Golgi vesicle transport	2.57e-08	3031	2.15e-10	0.759007	GO:0048193	292	32	ARF5|RP2|SNX8|YKT6|EXOC2|SNAP23|EXOC4|ARF3|SNX1|RAB2A|NAPA|ARCN1|CUL3|RAB10|PDCD6|SCYL1|VPS51|ANK3|CYTH3|SEC23A|RAB1B|LLGL1|NAPG|COPG1|AP2A1|RAB13|OPTN|SNX2|DNM2|SEC31A|RAB1A|COPE
STRING Clusters	Golgi vesicle transport, and SNARE complex	0.0257	3031	0.00056	0.159007	CL:13130	154	13	SNAP29|YKT6|SNAP23|RAB2A|NAPA|ARCN1|VPS51|SEC23A|NAPG|COPG1|STXBP1|SEC31A|COPE
COMPARTMENTS	Golgi-associated vesicle membrane	0.0084	3031	0.00043	0.207572	GOCC:0030660	93	10	PI4KA|ARCN1|PDCD6|SCYL1|SEC23A|COPG1|AP1B1|AP2A1|SEC31A|COPE
GO Cellular Component	Golgi-associated vesicle membrane	0.017	3031	0.0015	0.176955	GO:0030660	57	7	PI4KA|ARCN1|SCYL1|COPG1|AP1B1|AP2A1|COPE
Reactome Pathways	Golgi-to-ER retrograde transport	0.00018	3031	1.03e-05	0.374473	HSA-8856688	133	15	ARF5|ARF3|NAPA|ARCN1|TUBB4A|RAB1B|TUBB6|TUBB3|NAPG|COPG1|TUBB4B|RAB1A|RAB3GAP1|TUBA1C|COPE
TISSUES	Gonad	1.81e-11	3031	3.05e-13	1.07423	BTO:0000534	1923	110	RANBP9|AHCY|SNX17|DDX39A|CANX|SNAP23|CNN1|EXOC4|ARF3|CCT7|ITGAV|IPO5|ANKRD13A|HACD3|SNX1|NAPA|FARP2|TUBB4A|CUL3|PRKAR2A|IDE|PXN|CDH2|SCYL1|RASA1|NONO|CCT5|RPN1|ERAP1|CTNNA1|SEC23A|GNAI2|TCP1|PKM|PPP2R1A|RIC8A|EIF4A2|AP2A2|ACSL4|SEPTIN6|RPS2|MAP4K4|ANXA2|ATG7|PLS3|PSMD12|ANKLE2|PCBP2|MYLK|CYB5R3|UTRN|RARS2|PHACTR4|HSPA1L|AHNAK|OPTN|SLC25A6|GART|FSCN1|GARS1|XRCC5|WASF1|ASNS|CCT4|PPP3CB|SEC31A|WDR6|…
Reactome Pathways	GPER1 signaling	0.0166	3031	0.0023	0.177989	HSA-9634597	45	6	PRKAR2A|ITGA5|GNAI2|GNAI3|ITGB1|SHC1
STRING Clusters	GPVI-mediated activation cascade, and SH2 domain superfamily	0.0257	3031	0.00054	0.159007	CL:17470	62	8	PLCG1|PDGFRB|CBL|CRK|BCR|PTK2|FYN|SHC1
InterPro Domains	GroEL-like apical domain superfamily	0.0204	3031	0.00015	0.169037	IPR027409	15	5	CCT7|CCT6A|CCT5|TCP1|CCT4
InterPro Domains	GroEL-like equatorial domain superfamily	0.0159	3031	0.00011	0.17986	IPR027413	14	5	CCT7|CCT6A|CCT5|TCP1|CCT4
Monarch Phenotype	Growth abnormality	0.0015	3031	1.03e-05	0.282391	HP:0001507	2182	94	EFNB1|SNAP29|AHCY|RP2|AIMP2|ACTA2|GALK1|SLC25A11|PMPCB|PI4KA|RRAS2|NOTCH2|MPP5|TAOK1|AARS1|PDGFRB|SLC12A2|MAP2K2|SLC9A1|ARCN1|CBL|TUBB4A|ACAT1|PIK3C2A|RASA1|NONO|VPS51|ANK3|GNAQ|INPPL1|HPRT1|MAP2K1|YWHAG|SEC23A|ACAD9|MET|VPS37A|RPS15A|TUBB3|TUFM|FTSJ1|BGN|EPB41L1|ACSL4|PSMD12|AP1B1|ANKLE2|GMPPA|CASP8|MYPN|MYLK|LONP1|CYB5R3|KIF14|NHLRC2|MAP3K7|NRAS|RARS2|NSDHL|DPM1|STXBP1|FGD1|ITPA|DNM2|GARS1|GIPC…
COMPARTMENTS	Growth cone	0.0127	3031	0.00067	0.18962	GOCC:0030426	81	9	EXOC4|IQGAP1|IGF2BP1|BASP1|TUBB3|DPYSL3|FSCN1|CDK5|CFL1
GO Cellular Component	Growth cone	6.17e-05	3031	3.34e-06	0.420971	GO:0030426	171	18	EXOC4|CBL|IQGAP1|IGF2BP1|ITGA3|BASP1|TUBB3|EXOC7|DPYSL3|ABI1|FSCN1|DNM2|CTNND1|CDK5|CFL1|PPP1R9B|CYFIP1|EPS8
Monarch Phenotype	Growth delay	0.021	3031	0.00037	0.167778	HP:0001510	1525	65	EFNB1|SNAP29|AHCY|AIMP2|PI4KA|RRAS2|NOTCH2|MPP5|TAOK1|AARS1|PDGFRB|SLC12A2|MAP2K2|SLC9A1|ARCN1|CBL|TUBB4A|PIK3C2A|NONO|INPPL1|HPRT1|MAP2K1|YWHAG|SEC23A|RPS15A|TUFM|BGN|EPB41L1|PSMD12|AP1B1|ANKLE2|GMPPA|CASP8|LONP1|CYB5R3|KIF14|MAP3K7|NRAS|NSDHL|STXBP1|FGD1|ITPA|GARS1|FAT4|TKT|DDOST|RAB3GAP1|RPL10|EIF2B1|SLC2A1|FLNB|SERPINH1|PLCB3|ACTG1|ADSL|PHGDH|CASK|RPS7|CTNNB1|RPL11|TPM2|EIF4A3|TTC37|AMPD2|JAK1
KEGG Pathways	Growth hormone synthesis, secretion and action	0.0012	3031	0.00018	0.292082	hsa04935	117	12	PLCG1|MAP2K2|GNAQ|CRK|MAP2K1|GNAI2|PLCB1|PTK2|NRAS|GNAI3|SHC1|PLCB3
Reactome Pathways	GSK3B and BTRC:CUL1-mediated-degradation of NFE2L2	0.0076	3031	0.00086	0.211919	HSA-9762114	51	7	PSMC4|PSMD10|PSMA2|PSMC1|PSMD11|PSMD12|PSME1
GO Molecular Function	GTP binding	7.39e-13	3031	3.45e-15	1.21314	GO:0005525	381	45	ARF5|RALA|RP2|EHD4|RAB35|RRAS2|ARF3|RAB2A|EHD2|TUBB4A|RAB10|RAB7A|ARL8A|RALB|GNAQ|ARF6|RAB1B|GNAI2|TUBB6|RAP2B|TUBB3|TUFM|RAB12|RAB11B|TUBB4B|SEPTIN6|RAB13|NRAS|RAP1A|GNAI3|SEPTIN8|DNM2|RAB2B|RAB1A|GSPT1|RHOA|SEPTIN7|ARL15|TUBA1C|RAN|EHD1|ARL8B|SEPTIN2|CDC42|ARHGAP35
Reactome Pathways	GTP hydrolysis and joining of the 60S ribosomal subunit	1.98e-06	3031	5.46e-08	0.570333	HSA-72706	111	17	RPL19|RPS15A|EIF4A2|RPS2|RPLP1|RPS3A|EIF2S2|EIF1AX|RPL34|RPL6|RPL10|RPS13|RPS4Y2|RPL9|RPS7|RPL11|RPS27
UniProt Keywords	GTP-binding	5.99e-13	3031	8.91e-15	1.22226	KW-0342	342	42	ARF5|RALA|RP2|RAB35|RRAS2|ARF3|RAB2A|TUBB4A|RAB10|RAB7A|ARL8A|RALB|GNAQ|ARF6|RAB1B|GNAI2|TUBB6|RAP2B|TUBB3|TUFM|RAB12|RAB11B|TUBB4B|SEPTIN6|RAB13|NRAS|RAP1A|GNAI3|SEPTIN8|DNM2|RAB2B|RAB1A|GSPT1|RHOA|SEPTIN7|ARL15|TUBA1C|RAN|ARL8B|SEPTIN2|CDC42|ARHGAP35
UniProt Keywords	GTPase activation	6.93e-06	3031	2.48e-07	0.515927	KW-0343	190	21	RP2|TBC1D17|RAPGEF2|RASA1|BCR|ABR|ARHGAP1|RASA3|ARHGEF1|RAP1GDS1|ARHGAP12|SRGAP1|ARHGAP18|GDI2|ARAP1|GDI1|TBC1D5|RAB3GAP1|TBC1D15|SIPA1L1|ARHGAP35
GO Molecular Function	GTPase activator activity	4.24e-09	3031	3.18e-11	0.837263	GO:0005096	269	32	RP2|TBC1D17|HACD3|RAPGEF2|NRP1|IQGAP1|RASA1|FLCN|GNAQ|BCR|ABR|SEC23A|ARHGAP1|LLGL1|RASA3|ARHGEF1|PLCB1|RAP1GDS1|MTSS2|ARHGAP12|SRGAP1|IQGAP3|ARHGAP18|GDI2|ARAP1|AGFG1|GDI1|TBC1D5|RAB3GAP1|TBC1D15|SIPA1L1|ARHGAP35
GO Molecular Function	GTPase activity	2.21e-10	3031	1.48e-12	0.965561	GO:0003924	317	37	ARF5|RALA|RAB35|RRAS2|ARF3|RAB2A|RAB10|RAB7A|ARL8A|RALB|RASA1|GNAQ|ARF6|RAB1B|GNAI2|RAP2B|TUFM|RAB12|RAB11B|SEPTIN6|RAB13|NRAS|RAP1A|GNAI3|SEPTIN8|DNM2|RAB2B|RAB1A|GSPT1|RHOA|SEPTIN7|ARL15|RAN|ARL8B|SEPTIN2|CDC42|ARHGAP35
GO Molecular Function	GTPase binding	4.56e-09	3031	3.51e-11	0.834104	GO:0051020	304	34	DVL2|RANBP9|EXOC2|EXOC4|IPO5|RAB7A|TNPO3|IQGAP1|RASA1|DOCK11|RAPGEF6|ARHGAP1|PAK2|XPOT|FMNL3|MTSS2|IQGAP3|IPO9|AFDN|RAP1A|PKN2|FGD1|OPTN|GDI2|PICALM|SH3BP4|GDI1|CORO1C|RAB3GAP1|EHD1|CYFIP1|FARP1|EPS8|ENO1
GO Molecular Function	GTPase regulator activity	4.13e-12	3031	2.18e-14	1.1384	GO:0030695	474	49	RP2|TBC1D17|BCAR3|IPO5|HACD3|FARP2|RAPGEF2|NRP1|IQGAP1|RASA1|DOCK11|FLCN|GNAQ|RAPGEF6|CYTH3|BCR|ABR|SEC23A|ARHGAP1|DNMBP|LLGL1|RIC8A|RASA3|ARHGEF1|PLCB1|RAP1GDS1|MTSS2|ARHGAP12|SRGAP1|ITSN2|IQGAP3|ARHGAP18|RAP1A|FGD1|GDI2|SBF1|ARAP1|SH3BP4|AGFG1|GDI1|TBC1D5|RAB3GAP1|DENND2B|TBC1D15|SIPA1L1|SIRPA|FARP1|DOCK10|ARHGAP35
SMART Domains	GTPase-activator protein for Rho-like GTPases	0.0338	3031	0.00094	0.147108	SM00324	68	8	BCR|ABR|ARHGAP1|ARHGAP12|SRGAP1|ARHGAP18|ARAP1|ARHGAP35
SMART Domains	Guanine nucleotide exchange factor for Rho/Rac/Cdc42-like GTPases	0.0322	3031	0.00078	0.149214	SM00325	66	8	FARP2|BCR|ABR|DNMBP|ARHGEF1|ITSN2|FGD1|FARP1
UniProt Keywords	Guanine-nucleotide releasing factor	0.00053	3031	2.75e-05	0.327572	KW-0344	164	16	BCAR3|FARP2|RAPGEF2|DOCK11|RAPGEF6|CYTH3|BCR|ABR|DNMBP|RIC8A|ARHGEF1|FGD1|SBF1|DENND2B|FARP1|DOCK10
GO Molecular Function	Guanyl-nucleotide exchange factor activity	0.00038	3031	5.46e-06	0.342022	GO:0005085	215	20	BCAR3|FARP2|RAPGEF2|DOCK11|RAPGEF6|CYTH3|BCR|ABR|DNMBP|RIC8A|ARHGEF1|RAP1GDS1|ITSN2|RAP1A|FGD1|SBF1|RAB3GAP1|DENND2B|FARP1|DOCK10
GO Molecular Function	Guanylate kinase activity	0.0152	3031	0.0003	0.181816	GO:0004385	9	4	DLG1|MPP1|TJP2|CASK
SMART Domains	Guanylate kinase homologues.	0.00036	3031	3.04e-06	0.34437	SM00072	27	8	MPP6|MPP5|DLG1|MPP1|DLG5|MAGI1|TJP2|CASK
InterPro Domains	Guanylate kinase-like domain	0.00035	3031	1.12e-06	0.345593	IPR008144	23	8	MPP6|MPP5|DLG1|MPP1|DLG5|MAGI1|TJP2|CASK
InterPro Domains	Guanylate kinase, conserved site	0.0035	3031	1.82e-05	0.245593	IPR020590	16	6	MPP6|MPP5|DLG1|MPP1|MAGI1|CASK
InterPro Domains	Guanylate kinase/L-type calcium channel beta subunit	0.00066	3031	2.4e-06	0.318046	IPR008145	26	8	MPP6|MPP5|DLG1|MPP1|DLG5|MAGI1|TJP2|CASK
Monarch Phenotype	Hair color	0.0142	3031	0.00022	0.184771	EFO:0003924	120	12	EXOC2|BCR|FMN2|TUBB3|EZR|EPHB4|PLXNB2|CDC42BPA|PTPN14|DNAJB4|AHNAK|AKAP12
Monarch Phenotype	Hair colour measurement	0.0185	3031	0.00032	0.173283	EFO:0007822	249	18	MPP6|EXOC2|BCAR3|NRG1|AXL|FMN2|RASA3|EPB41L1|EZR|PLXNB2|COMT|CDC42BPA|PTPN14|DNAJB4|AHNAK|AKAP12|ARL15|ACTG1
Monarch Phenotype	Hair morphology measurement	0.019	3031	0.00033	0.172125	EFO:0007821	513	29	MPP6|EXOC2|BCAR3|EHBP1|IQGAP1|NRG1|AXL|DIP2B|FMN2|MPDZ|BGN|RASA3|EPB41L1|EZR|FYN|PLXNB2|COMT|CDC42BPA|PTPN14|EPB41L2|DNAJB4|DLG5|AHNAK|AKAP12|NFIC|ARL15|ACTG1|SEPTIN2|CTNNB1
Reactome Pathways	HCMV Infection	0.0095	3031	0.0011	0.202228	HSA-9609646	126	11	TSG101|TUBB4A|VPS37B|EGFR|VPS37A|TUBB6|TUBB3|TUBB4B|ITGB1|TUBA1C|UBAP1
TISSUES	Head	2.78e-42	3031	1.49e-44	4.1556	BTO:0000282	6642	344	ARF5|RALA|MRI1|EFNB1|SNAP29|TAB1|PYGB|TPD52L2|AHCY|PSMD10|CSK|TBC1D17|PSMA2|YKT6|AK1|ACTA2|RPL19|GALK1|SLC25A11|LRRC59|ARPC3|RAB35|EXOC2|SNX17|SLC1A4|PLCG1|VASP|TRAP1|CANX|PMPCB|TSG101|NECTIN2|NUMBL|HIP1R|GRWD1|EXOC4|WDR44|LGALS3|EFR3A|PI4KA|NOTCH2|ARF3|PRPH|CCT7|TBRG4|PSMC1|IPO5|MPP5|TAOK1|PDGFRB|HACD3|COTL1|SLC12A2|RAB2A|ACTR3|PACSIN2|EHD2|NAPA|EHBP1|ARCN1|FARP2|TUBB4A|CUL3|RAB10|PDCD6|RAB7A|PR…
WikiPathways	Head and neck squamous cell carcinoma	0.0413	3031	0.0051	0.138405	WP4674	72	7	NOTCH2|AJUBA|CUL3|EGFR|CASP8|NRAS|CTNNB1
GO Biological Process	Head development	3.72e-07	3031	3.98e-09	0.642946	GO:0060322	823	55	CSK|NUMBL|MPP5|AARS1|MAP2K2|NAPA|ARCN1|RAPGEF2|NRP1|ACAT1|CDH2|EGFR|VPS51|NRG1|IGF2BP1|BAX|HPRT1|CRK|AXL|MAP2K1|BCR|CTNNA1|MMP14|PFAS|BASP1|ENO3|PLCB1|SRR|FYN|MINK1|SCRIB|ATP2B4|PLXNB2|KIF14|GNAI3|STXBP3|DLG5|GART|XRCC5|PLXNA1|FAT4|ITGB1|CTNND1|EPHB2|ATP2B1|RHOA|RAB3GAP1|SLC2A1|CDK5|SRGAP2C|PPP1R9B|PHGDH|CTNNB1|CDC42|ARHGAP35
Monarch Phenotype	Hearing abnormality	0.0158	3031	0.00026	0.180134	HP:0000364	1327	59	EFNB1|SNAP29|RP2|GALK1|SLC25A11|PMPCB|PI4KA|RRAS2|NOTCH2|MPP5|AARS1|PDGFRB|SLC12A2|CBL|TUBB4A|PIK3C2A|CDH11|GNAQ|DNAAF5|VPS37A|MPDZ|TUBB3|FTSJ1|NEXN|PLS1|ACSL4|PSMD12|AP1B1|GMPPA|TPM1|MYPN|LONP1|MAP3K7|NRAS|GNAI3|NSDHL|ADPRHL2|PIP4K2A|GIPC1|FAT4|CTNND1|MAGI1|TPRN|TKT|GDI1|RPL10|FLNB|TENM3|SERPINH1|ACTG1|WBP2|YAP1|CASK|CTNNB1|RPL11|RDX|TPM2|CDC42|MTHFD1
Monarch Phenotype	Hearing impairment	0.0459	3031	0.001	0.133819	HP:0000365	1288	55	EFNB1|SNAP29|RP2|GALK1|SLC25A11|PMPCB|PI4KA|RRAS2|NOTCH2|MPP5|AARS1|PDGFRB|SLC12A2|CBL|TUBB4A|PIK3C2A|CDH11|DNAAF5|VPS37A|MPDZ|TUBB3|FTSJ1|NEXN|PLS1|ACSL4|PSMD12|AP1B1|GMPPA|TPM1|MYPN|LONP1|MAP3K7|NRAS|GNAI3|NSDHL|ADPRHL2|GIPC1|FAT4|CTNND1|TPRN|TKT|GDI1|RPL10|FLNB|SERPINH1|ACTG1|WBP2|YAP1|CASK|CTNNB1|RPL11|RDX|TPM2|CDC42|MTHFD1
TISSUES	Heart	7.37e-06	3031	2.19e-07	0.513253	BTO:0000562	738	47	PYGB|RIPK2|AK1|RRAS2|CCT7|PSMD11|SLC9A1|ACAT1|PGD|ITGA2|NUDC|PKM|TUFM|ENO3|EIF4A2|ANXA2|RPLP1|PDLIM7|ATP5F1C|ATP2B4|EPHB4|TPM1|MYLK|PTPN14|UTRN|EPB41L2|NSDHL|CHUK|PDLIM1|ABI1|AHNAK|XRCC5|TAGLN|WDR6|ITGB1|AKAP12|SLC4A7|NFIC|PPP2R5D|FLNB|SERPINH1|ITGA7|CNN2|CDC42EP3|RPL9|EIF4A3|RPS27
GO Biological Process	Heart development	0.0125	3031	0.00044	0.190309	GO:0007507	548	30	DVL2|TAB1|SNX17|NOTCH2|PDGFRB|MAP2K2|SLC9A1|NRP1|SRI|NRG1|MAP2K1|ITGA3|PTK2|PDLIM7|AP1B1|EPHB4|TPM1|CASP8|PDLIM1|STK4|BICC1|PPP3CB|ITGB1|ILK|NFATC4|SHC1|YAP1|CTNNB1|CDC42|MTHFD1
Reactome Pathways	Hedgehog ligand biogenesis	0.0199	3031	0.0028	0.170115	HSA-5358346	64	7	PSMC4|PSMD10|PSMA2|PSMC1|PSMD11|PSMD12|PSME1
Reactome Pathways	Hedgehog off state	0.00042	3031	2.77e-05	0.337675	HSA-5610787	111	13	PSMC4|PSMD10|PSMA2|PSMC1|PSMD11|TUBB4A|PRKAR2A|TUBB6|TUBB3|TUBB4B|PSMD12|PSME1|TUBA1C
Reactome Pathways	Hedgehog on state	0.0076	3031	0.00084	0.211919	HSA-5632684	84	9	PSMC4|PSMD10|PSMA2|PSMC1|PSMD11|SMURF2|CUL3|PSMD12|PSME1
Monarch Phenotype	Heel bone mineral density	0.0037	3031	3.82e-05	0.24318	EFO:0009270	878	46	EHD4|SNX8|RAB35|ARF3|COTL1|SLC12A2|PRKAR2A|CDH11|FLCN|ABI2|ITGB5|AXL|ABR|MMP14|ARHGAP1|FMN2|MPDZ|CTSB|DLG1|ATG7|FILIP1L|AP1B1|MCMBP|PHLDB1|EPB41L2|ARHGAP18|PKN2|NIBAN2|NEK6|BICC1|PARD3|AHNAK|AKAP12|NFIC|FLNB|MYO10|DENND2B|TUBA1C|PEAK1|TLN2|RSL1D1|BCAS3|PPP1R9B|CYFIP1|CDC42|MTHFD1
Monarch Phenotype	Hemangioma	0.0499	3031	0.0011	0.13019	HP:0001028	126	11	SLC25A11|RRAS2|MAP2K2|RASA1|GNAQ|MAP2K1|SEC23A|EPHB4|NRAS|DPM1|DNM2
Monarch Phenotype	Hematological measurement	7.81e-12	3031	6.4e-16	1.11073	EFO:0004503	4592	211	BAIAP2L1|TAB1|PYGB|CSK|EHD4|CDC37|SNX8|AIMP2|SERPINE1|YKT6|AK1|ACTA2|GALK1|SLC25A11|CD82|EXOC2|SNX17|DDX39A|ADGRE5|PLCG1|TRAP1|CANX|NECTIN2|HIP1R|PI4KA|NOTCH2|TBRG4|BCAR3|TAOK1|PDGFRB|HACD3|SLC12A2|RAB2A|MAP2K2|PACSIN2|EHBP1|ARCN1|CBL|FARP2|CUL3|RAB10|RAB7A|NRP1|TNPO3|PIK3C2A|PXN|IQGAP1|CDH2|PFKL|RALB|EGFR|DOCK11|USP15|FLCN|ZDHHC5|NRG1|MYO1E|ATP5MF|BAX|ITGB5|RPN1|ITGA2|ERAP1|RAPGEF6|STAT6|CRK|AXL…
TISSUES	Hematopoietic cell	1.39e-10	3031	2.74e-12	0.985699	BTO:0000574	1019	71	TPD52L2|RPL19|CD82|PLCG1|SNAP23|NOTCH2|CCT7|IPO5|ACTR3|SLC9A1|TUBB4A|PRKAR2A|CCT5|GNAQ|ERAP1|ARF6|MAP2K1|YWHAG|TCP1|RPS15A|PKM|TUFM|HNRNPM|PTK2|TUBB4B|RPS2|ANXA2|RPS3A|FYN|PSMD12|ATP2B4|CASP8|KIRREL1|PCBP2|CYB5R3|NIBAN1|EPB41L2|MPP1|CHUK|MAPRE1|ABI1|PIP4K2A|AHNAK|SBF1|SLC25A6|GART|GARS1|ASNS|CCT4|NFATC4|PPP1R12A|ATP2B1|RPL6|RPL10|FNBP1|FLNB|CFL1|RAN|ACTG1|RSL1D1|SIRPA|HSPH1|PHGDH|RPL9|RPS7|ENO1|R…
TISSUES	Hematopoietic system	2.17e-23	3031	2.05e-25	2.26635	BTO:0000570	2755	172	RALA|PSMC4|PYGB|TPD52L2|AHCY|CDC37|NAMPT|RPL19|CD82|ARPC3|EXOC2|SNX17|DOK1|SLC1A4|ADGRE5|PLCG1|VASP|CANX|SNAP23|NOTCH2|CCT7|IPO5|PSMD11|TAOK1|ANKRD13A|COTL1|MAP2K2|ACTR3|NAPA|PPP1R12C|SLC9A1|TUBB4A|PRKAR2A|PFKL|PGD|RALB|CCT6A|NONO|CCT5|FLCN|GNAQ|UBE2L6|ATP5MF|ITGB5|ITGA2|ERAP1|ARF6|STAT6|MAP2K1|BCR|YWHAG|ARHGAP1|ACAD9|PAK2|TCP1|RPS15A|RAP2B|PKM|FARSA|TUFM|PPP2R1A|LASP1|HNRNPM|EIF4A2|BGN|RASA3|RAP…
Reactome Pathways	Hemostasis	3.24e-07	3031	6.38e-09	0.648945	HSA-109582	607	45	CSK|SERPINE1|PLCG1|ITGAV|EHD2|TUBB4A|PRKAR2A|SRI|DOCK11|GNAQ|ITGA5|ANXA5|ITGA2|CRK|GNAI2|ITGA3|TUBB6|TUBB3|PPP2R1A|PTK2|TUBB4B|ANXA2|FYN|ATP2B4|TAGLN2|NHLRC2|NRAS|RAP1A|GNAI3|STXBP3|SDC1|ITGB1|ATP2B1|RHOA|SHC1|PPP2R5D|CDK5|CFL1|TUBA1C|YES1|SIRPA|EHD1|SERPINB6|DOCK10|CDC42
KEGG Pathways	Hepatitis B	0.0203	3031	0.0058	0.16925	hsa05161	158	11	TAB1|MAP2K2|BAX|STAT6|MAP2K1|CASP8|MAP3K7|NRAS|CHUK|NFATC4|JAK1
WikiPathways	Hepatitis B infection	0.0357	3031	0.004	0.144733	WP4666	150	11	TAB1|MAP2K2|BAX|STAT6|MAP2K1|CASP8|MAP3K7|NRAS|CHUK|NFATC4|JAK1
KEGG Pathways	Hepatitis C	0.0196	3031	0.0055	0.170774	hsa05160	157	11	MAP2K2|EGFR|BAX|MAP2K1|YWHAG|PPP2R1A|CASP8|NRAS|CHUK|CTNNB1|JAK1
KEGG Pathways	Hepatocellular carcinoma	0.0045	3031	0.00082	0.234679	hsa05225	161	13	DVL2|PLCG1|MAP2K2|EGFR|BAX|MAP2K1|MET|NQO1|NRAS|SHC1|TXNRD1|ACTG1|CTNNB1
Reactome Pathways	Activation of NMDA receptors and postsynaptic events	0.0014	3031	0.0001	0.285387	HSA-442755	93	11	TUBB4A|PRKAR2A|NRG1|TUBB6|TUBB3|TUBB4B|DLG1|NRAS|PRKAB1|TUBA1C|CASK
GO Molecular Function	Heterocyclic compound binding	9.29e-09	3031	7.54e-11	0.803198	GO:1901363	5977	236	ARF5|RALA|PSMC4|YTHDC2|PYGB|TPD52L2|AHCY|RP2|CSK|EHD4|RIPK2|SEC61B|AK1|ACTA2|RPL19|GALK1|SLC25A11|LRRC59|RAB35|DDX39A|TRAP1|CANX|TSG101|GRWD1|LGALS3|PI4KA|RRAS2|ARF3|CCT7|TBRG4|PSMC1|IPO5|MPP5|TAOK1|AARS1|PDGFRB|RAB2A|MAP2K2|ACTR3|EHD2|ARCN1|TUBB4A|RAPGEF2|RAB10|RAB7A|PRKAR2A|ACAT1|PIK3C2A|IDE|CDH2|PFKL|SCYL1|PGD|ARL8A|RALB|EGFR|CCT6A|NONO|CCT5|QDPR|GNAQ|UBE2L6|MYO1E|IGF2BP1|CSTB|RPN1|ARF6|HPRT1|…
Reactome Pathways	Hh mutants are degraded by ERAD	0.0103	3031	0.0013	0.198716	HSA-5362768	55	7	PSMC4|PSMD10|PSMA2|PSMC1|PSMD11|PSMD12|PSME1
KEGG Pathways	HIF-1 signaling pathway	0.0045	3031	0.00083	0.234679	hsa04066	102	10	SERPINE1|PLCG1|MAP2K2|PFKL|EGFR|MAP2K1|ENO3|CUL2|SLC2A1|ENO1
Monarch Phenotype	High palate	0.0017	3031	1.26e-05	0.276955	HP:0000218	635	38	EFNB1|ACTA2|RRAS2|NOTCH2|MPP5|SLC12A2|MAP2K2|ARCN1|CBL|CDH11|CDH2|NONO|VPS51|MAP2K1|SEC23A|RPS15A|TUBB3|EXOC7|PSMD12|MYPN|MYLK|PTPN14|MAP3K7|NRAS|NSDHL|DPM1|GIPC1|FAT4|RAB3GAP1|PPP2R5D|FLNB|ITGA7|CASK|RPS7|CTNNB1|RPL11|TPM2|EIF4A3
KEGG Pathways	Hippo signaling pathway	1.25e-05	3031	8.55e-07	0.490309	hsa04390	154	18	DVL2|SERPINE1|MPP5|AJUBA|CTNNA1|YWHAG|LLGL1|PPP2R1A|TP53BP2|FRMD6|DLG1|SCRIB|AMOT|DLG5|PARD3|ACTG1|YAP1|CTNNB1
KEGG Pathways	Hippo signaling pathway - multiple species	0.0316	3031	0.01	0.150031	hsa04392	28	4	AJUBA|FRMD6|FAT4|YAP1
STRING Clusters	Hippo signaling pathway - multiple species, and Short repeats in human TONDU, fly vestigial and other proteins.	0.0012	3031	1.07e-05	0.292082	CL:21972	33	8	MPDZ|FRMD6|PTPN14|AMOT|STK4|AMOTL1|AMOTL2|YAP1
WikiPathways	Hippo signaling regulation pathways	9.26e-07	3031	1.07e-08	0.603339	WP4540	98	17	PDGFRB|CDH6|PRKAR2A|CDH11|CDH2|EGFR|GNAQ|GNAI2|MET|PLCB1|EPHA2|GNAI3|RHOA|PRKAB1|PLCB3|CTNNB1|CDC42
STRING Clusters	Hippo signaling, and Short repeats in human TONDU, fly vestigial and other proteins.	0.0106	3031	0.00018	0.197469	CL:21973	26	6	MPDZ|AMOT|STK4|AMOTL1|AMOTL2|YAP1
WikiPathways	Hippo-Merlin signaling dysregulation	6.1e-10	3031	3.9e-12	0.921467	WP4541	119	23	ITGAV|PDGFRB|AJUBA|CDH6|PRKAR2A|CDH11|CDH2|EGFR|ITGA5|ITGB5|ITGA2|CTNNA1|PAK2|ITGA3|MET|PTK2|EPHA2|NRAS|AMOT|ITGB1|PPP1R12A|ITGA7|CTNNB1
Reactome Pathways	HIV Infection	8.45e-05	3031	3.93e-06	0.407314	HSA-162906	229	21	PSMC4|PSMD10|PSMA2|TSG101|PSMC1|PSMD11|VPS37B|PAK2|VPS37A|AP2A2|FYN|PSMD12|AP1B1|AP2A1|VTA1|SLC25A6|PSME1|XRCC5|POLR2H|RAN|UBAP1
WikiPathways	B cell receptor signaling pathway	0.0022	3031	0.00015	0.265758	WP23	97	11	PLCG1|MAP2K2|CBL|CRK|MAP2K1|FYN|MAP3K7|CHUK|SHC1|PIP5K1C|CDC42
Reactome Pathways	Host Interactions of HIV factors	0.00044	3031	2.98e-05	0.335655	HSA-162909	129	14	PSMC4|PSMD10|PSMA2|PSMC1|PSMD11|PAK2|AP2A2|FYN|PSMD12|AP1B1|AP2A1|SLC25A6|PSME1|RAN
UniProt Keywords	Host-virus interaction	3.12e-11	3031	5.57e-13	1.05058	KW-0945	540	50	PLCG1|CANX|TSG101|NECTIN2|ITGAV|IPO5|RAB7A|IDE|IQGAP1|EGFR|USP15|SH3RF1|BAX|ITGA5|ABI2|ITGB5|ITGA2|AXL|PAK2|MPDZ|TUFM|EIF4A2|SEPTIN6|DLG1|ANXA2|FYN|ITSN2|SCRIB|EPHA2|CASP8|PCBP2|MSN|NCKAP1|MAP3K7|PKN2|ABI1|OPTN|TRIM5|IL6ST|SLC25A6|XRCC5|ITGB1|RHOA|SHC1|CUL2|DAG1|SLC1A5|RAN|WASF2|CTNNB1
STRING Clusters	HSP40/DnaJ peptide-binding, and Denatured protein binding	0.0257	3031	0.00054	0.159007	CL:1774	11	4	DNAJA2|DNAJB4|HSPA1L|HSPH1
Reactome Pathways	Downstream signaling events of B Cell Receptor (BCR)	0.00045	3031	3.03e-05	0.334679	HSA-1168372	80	11	PSMC4|PSMD10|PSMA2|PSMC1|PSMD11|PSMD12|MAP3K7|NRAS|CHUK|PSME1|PPP3CB
KEGG Pathways	Human cytomegalovirus infection	2.41e-05	3031	1.8e-06	0.461798	hsa05163	217	21	ITGAV|MAP2K2|EGFR|GNAQ|BAX|CRK|MAP2K1|GNAI2|ARHGEF1|PLCB1|PTK2|CASP8|NRAS|GNAI3|CHUK|PPP3CB|NFATC4|RHOA|PLCB3|CTNNB1|JAK1
KEGG Pathways	Human immunodeficiency virus 1 infection	1.02e-05	3031	6.7e-07	0.49914	hsa05170	203	21	TAB1|PLCG1|CCNB1|MAP2K2|GNAQ|BAX|CRK|MAP2K1|GNAI2|PAK2|PTK2|AP1B1|CASP8|MAP3K7|NRAS|GNAI3|CHUK|TRIM5|PPP3CB|NFATC4|CFL1
KEGG Pathways	Human papillomavirus infection	5.5e-08	3031	2.29e-09	0.725964	hsa05165	324	32	DVL2|NOTCH2|ITGAV|PSMC1|MPP5|PDGFRB|MAP2K2|EGFR|BAX|ITGA5|ITGB5|ITGA2|MAP2K1|ITGA3|PKM|LLGL1|PPP2R1A|PTK2|DLG1|SCRIB|CASP8|NRAS|CHUK|PARD3|ITGB1|MAGI1|PPP2R5D|ATP6V1C1|ITGA7|CTNNB1|CDC42|JAK1
KEGG Pathways	Human T-cell leukemia virus 1 infection	0.0055	3031	0.0011	0.225964	hsa05166	210	15	CANX|MAP2K2|NRP1|BAX|MAP2K1|DLG1|NRAS|CHUK|SLC25A6|PPP3CB|NFATC4|SLC2A1|RAN|TLN2|JAK1
KEGG Pathways	Huntington disease	0.0022	3031	0.00033	0.265758	hsa05016	295	20	PSMC4|PSMA2|PSMC1|PSMD11|TUBB4A|GNAQ|BAX|TUBB6|TUBB3|AP2A2|PLCB1|TUBB4B|PSMD12|ATP5F1C|CASP8|AP2A1|SLC25A6|POLR2H|TUBA1C|PLCB3
GO Molecular Function	Hydrolase activity	0.00021	3031	2.72e-06	0.367778	GO:0016787	2347	102	ARF5|RALA|PSMC4|YTHDC2|TAB1|AHCY|RAB35|DDX39A|PLCG1|TRAP1|PMPCB|RRAS2|ARF3|CCT7|PSMC1|AARS1|RAB2A|EHD2|RAB10|RAB7A|IDE|ARL8A|RALB|RASA1|CCT6A|CCT5|USP15|GNAQ|MYO1E|ERAP1|INPPL1|ARF6|DDX19A|MMP14|RAB1B|GNAI2|CPNE1|TCP1|RAP2B|NPEPPS|TUFM|PPP2R1A|EIF4A2|RAB12|ATP11C|RAB11B|PLCB1|PARK7|PTK2|SEPTIN6|DPYSL3|CTSB|DLG1|ATP2B4|COPS5|CASP8|PTPRF|LONP1|PTPN14|KIF14|RAB13|NRAS|RAP1A|GNAI3|LRRC40|ADPRHL2|HSPA…
Monarch Phenotype	Hyperactivity	0.0243	3031	0.00046	0.161439	HP:0000752	423	25	SLC1A4|MPP5|AARS1|SLC12A2|CDH2|ANK3|GNAQ|YWHAG|FMN2|PPP2R1A|FTSJ1|EZR|ACSL4|PSMD12|KIF14|NSDHL|STXBP1|FGD1|PPP1R12A|TKT|GDI1|SLC2A1|ATP1A1|ADSL|CASK
Monarch Phenotype	Hypertelorism	7.82e-05	3031	2.81e-07	0.410679	HP:0000316	650	43	EFNB1|SNAP29|ACTA2|SLC1A4|RRAS2|NOTCH2|MPP5|SLC12A2|MAP2K2|CBL|CDH11|CDH2|NONO|VPS51|INPPL1|MAP2K1|SEC23A|ITGA3|RPS15A|PPP2R1A|BGN|PSMD12|MYPN|MYLK|MAP3K7|NRAS|DPM1|FGD1|FAT4|CTNND1|PPP1R12A|PPP2R5D|FLNB|TENM3|PLCB3|ACTG1|PHGDH|CASK|RPS7|RPL11|TPM2|CDC42|TTC37
KEGG Pathways	Hypertrophic cardiomyopathy	0.00015	3031	1.43e-05	0.382391	hsa05410	88	12	ITGAV|ITGA5|ITGB5|ITGA2|ITGA3|TPM1|ITGB1|PRKAB1|DAG1|ITGA7|ACTG1|TPM2
Monarch Phenotype	Hypoplasia of the corpus callosum	0.01	3031	0.00014	0.2	HP:0002079	462	28	EFNB1|AHCY|AIMP2|SLC1A4|TAOK1|SLC12A2|MAP2K2|NONO|VPS51|FMN2|TUBB3|PPP2R1A|EXOC7|EPB41L1|EZR|LONP1|NHLRC2|STXBP1|ASNS|FAT4|RAB3GAP1|DAG1|COASY|PHGDH|CASK|CTNNB1|CDC42|AMPD2
GO Biological Process	Hypothalamus development	0.0272	3031	0.0011	0.156543	GO:0021854	25	5	NRP1|BAX|PLXNA1|RAB3GAP1|CTNNB1
Monarch Phenotype	Hypotonia	0.00055	3031	2.64e-06	0.325964	HP:0001252	1505	73	EFNB1|SNAP29|AHCY|SLC1A4|PMPCB|PI4KA|RRAS2|MPP5|TAOK1|AARS1|SLC12A2|MAP2K2|CBL|TUBB4A|ACAT1|CDH2|NONO|VPS51|ANK3|QDPR|INPPL1|HPRT1|MAP2K1|YWHAG|ACAD9|ITGA3|FMN2|UGDH|TUBB3|TUFM|PPP2R1A|RAB11B|EPB41L1|PLCB1|EZR|PSMD12|AP1B1|GMPPA|MYPN|LONP1|KIF14|NHLRC2|NRAS|RARS2|GNAI3|NSDHL|DPM1|STXBP1|ITPA|DNM2|GARS1|WASF1|ASNS|FAT4|TKT|GDI1|DDOST|RAB3GAP1|RPL10|EIF2B1|SLC2A1|GPHN|PPP2R5D|SERPINH1|DAG1|PLCB3|IT…
Monarch Phenotype	Hypsarrhythmia	0.0295	3031	0.00057	0.153018	HP:0002521	175	14	AIMP2|SLC1A4|AARS1|SLC12A2|YWHAG|FMN2|UGDH|PLCB1|EZR|LONP1|STXBP1|ASNS|PHGDH|CASK
GO Cellular Component	I band	0.0015	3031	0.0001	0.282391	GO:0031674	146	14	SRI|ANK3|NEXN|FERMT2|PDLIM7|ATP2B4|MYPN|GLRX3|PDLIM1|PPP3CB|PPP1R12A|SLC2A1|FLNB|CTNNB1
GO Molecular Function	Identical protein binding	1.44e-05	3031	1.57e-07	0.484164	GO:0042802	2144	100	DVL2|MRI1|TPD52L2|AHCY|CSK|RIPK2|NAMPT|SNX8|DDX39A|TSG101|NECTIN2|HIP1R|MPP5|SNX1|SMURF2|PACSIN2|EHD2|CUL3|PDCD6|TNPO3|SRI|ACAT1|IDE|CDH2|PFKL|EGFR|NONO|USP15|RPIA|BAX|ABI2|HPRT1|STAT6|CTNNA1|YWHAG|PAK2|CPNE1|MET|UGDH|NQO1|PKM|PLCB1|EZR|SRR|PARK7|TP53BP2|DPYSL3|ANXA2|ATG7|FYN|TPM1|CASP8|LONP1|CDC42BPA|GLRX3|MAP3K7|SLK|CHUK|STK4|STXBP1|MAPRE1|PIP4K2A|SRM|ACOT7|AHNAK|OPTN|SNX2|TRIM5|ITPA|SDC1|IL6ST…
WikiPathways	IL-1 signaling pathway	0.0435	3031	0.0056	0.136151	WP195	55	6	TAB1|PLCG1|MAP2K2|MAP2K1|MAP3K7|CHUK
WikiPathways	IL-18 signaling pathway	0.0381	3031	0.0046	0.141908	WP4754	271	16	PYGB|ACTA2|PLCG1|AARS1|BAX|ARF6|MMP14|RASA3|CASP8|MAP3K7|CHUK|NFATC4|SLC4A7|EPS8|CTNNB1|ENO1
WikiPathways	IL-2 signaling pathway	0.0167	3031	0.0017	0.177728	WP49	42	6	MAP2K2|CBL|MAP2K1|FYN|SHC1|JAK1
WikiPathways	IL6 signaling pathway	0.0183	3031	0.0019	0.173755	WP364	43	6	MAP2K2|MAP2K1|MAP3K7|IL6ST|SHC1|JAK1
Reactome Pathways	Immune System	4.1e-11	3031	3.42e-13	1.03872	HSA-168256	1979	112	RALA|PSMC4|SNAP29|TAB1|PYGB|PSMD10|CSK|RIPK2|PSMA2|SEC61B|ARPC3|ADGRE5|PLCG1|VASP|CANX|SNAP23|NECTIN2|LGALS3|ITGAV|PSMC1|PSMD11|COTL1|SMURF2|ACTR3|CBL|TUBB4A|CUL3|RAB10|RAB7A|IQGAP1|PFKL|ARL8A|SH3RF1|UBE2L6|CSTB|ABI2|ITGB5|ERAP1|INPPL1|STAT6|CRK|MAP2K1|SEC23A|PAK2|CPNE1|TCP1|TUBB6|RAP2B|PKM|TUBB3|NPEPPS|PPP2R1A|EIF4A2|AP2A2|PTK2|TUBB4B|CTSB|ANXA2|ATG7|FYN|PSMD12|AP1B1|CASP8|AP2A1|PCBP2|MSN|NCKAP1…
TISSUES	Immune system	3.14e-12	3031	4.91e-14	1.15031	BTO:0005810	1664	102	TPD52L2|RPL19|CD82|EXOC2|ADGRE5|PLCG1|VASP|NOTCH2|CCT7|IPO5|ACTR3|PPP1R12C|SLC9A1|TUBB4A|PRKAR2A|RALB|NONO|CCT5|FLCN|UBE2L6|ATP5MF|ITGB5|STAT6|MAP2K1|YWHAG|ARHGAP1|ACAD9|TCP1|RPS15A|UGDH|PKM|TUFM|PPP2R1A|HNRNPM|EIF4A2|BGN|PTK2|TUBB4B|SEPTIN6|RPS2|MAP4K4|ANXA2|RPS3A|FYN|PSMD12|CASP8|PCBP2|PTPRF|NIBAN1|EPB41L2|GLRX3|MPP1|CHUK|PKN2|CMPK1|MAPRE1|ABI1|AHNAK|GDI2|SBF1|SLC25A6|GART|PSME1|GARS1|ASNS|FAT4…
GO Biological Process	IMP biosynthetic process	0.00017	3031	3.38e-06	0.376955	GO:0006188	11	6	HPRT1|PFAS|APRT|GART|ADSL|AMPD2
GO Biological Process	IMP salvage	0.0244	3031	0.00096	0.161261	GO:0032264	5	3	HPRT1|APRT|AMPD2
Monarch Phenotype	Increased head circumference	0.004	3031	4.34e-05	0.239794	HP:0040194	429	28	NOTCH2|MPP5|SLC12A2|MAP2K2|CDH2|NONO|ANK3|GNAQ|INPPL1|MAP2K1|SEC23A|MPDZ|TUBB3|FTSJ1|BGN|ACSL4|PSMD12|NRAS|GNAI3|DNM2|PPP1R12A|GDI1|EIF2B1|SLC2A1|PPP2R5D|SERPINH1|DAG1|CTNNB1
Reactome Pathways	Infectious disease	1.91e-24	3031	7.52e-27	2.3719	HSA-5663205	917	94	DVL2|PSMC4|TAB1|PSMD10|RIPK2|PSMA2|RPL19|ARPC3|PLCG1|CANX|TSG101|PSMC1|IPO5|MPP5|PSMD11|MAP2K2|ACTR3|CBL|TUBB4A|CUL3|RAB7A|NRP1|PRKAR2A|VPS37B|EGFR|ZDHHC5|ABI2|RPN1|CRK|MAP2K1|YWHAG|SEC23A|GNAI2|PAK2|MET|VPS37A|RPS15A|TUBB6|TUBB3|TUFM|AP2A2|HGS|PTK2|TUBB4B|RPS2|RPLP1|RPS3A|FYN|PSMD12|AP1B1|AP2A1|PCBP2|NCKAP1|COMT|VTA1|MAP3K7|GNAI3|CHUK|ABI1|SDC1|SLC25A6|PSME1|XRCC5|WASF1|RPL34|ITGB1|CTNND1|ARPC1B…
Monarch Phenotype	Infectious disease biomarker	0.0033	3031	3.21e-05	0.248149	EFO:0006843	1087	54	BAIAP2L1|CSK|EHD4|ACTA2|CD82|ADGRE5|CANX|NECTIN2|NOTCH2|MAP2K2|CBL|ACAT1|PIK3C2A|IQGAP1|EGFR|ANK3|NRG1|MYO1E|ATP5MF|BAX|CRK|BCR|GNAI2|PAK2|CPNE1|PDIA5|RASA3|PLCB1|DLG1|MINK1|ATP2B4|ANKLE2|CASP8|MYPN|PLXNB2|RAP1A|PALM2AKAP2|HSPA1L|PIP4K2A|ABCC1|MAGI1|SLC4A7|TBC1D5|SLC2A1|FLNB|PRKAB1|TLN2|SH3GLB1|SPATS2L|COBLL1|PHGDH|DOCK10|MTHFD1|JAK1
Reactome Pathways	Influenza Infection	6.24e-06	3031	2.19e-07	0.520482	HSA-168255	155	19	RPL19|CANX|IPO5|RPS15A|RPS2|RPLP1|RPS3A|SLC25A6|RPL34|RPL6|RPL10|POLR2H|RPS13|RAN|RPS4Y2|RPL9|RPS7|RPL11|RPS27
Reactome Pathways	Influenza Viral RNA Transcription and Replication	6.56e-05	3031	2.93e-06	0.41831	HSA-168273	135	16	RPL19|IPO5|RPS15A|RPS2|RPLP1|RPS3A|RPL34|RPL6|RPL10|POLR2H|RPS13|RPS4Y2|RPL9|RPS7|RPL11|RPS27
Reactome Pathways	Innate Immune System	5.72e-12	3031	4.51e-14	1.12426	HSA-168249	1041	76	PSMC4|SNAP29|TAB1|PYGB|PSMD10|RIPK2|PSMA2|ARPC3|ADGRE5|PLCG1|SNAP23|LGALS3|ITGAV|PSMC1|PSMD11|COTL1|ACTR3|RAB10|RAB7A|IQGAP1|PFKL|ARL8A|UBE2L6|CSTB|ABI2|STAT6|CRK|MAP2K1|PAK2|CPNE1|RAP2B|PKM|PPP2R1A|AP2A2|PTK2|TUBB4B|CTSB|ANXA2|ATG7|FYN|PSMD12|CASP8|PCBP2|NCKAP1|CYB5R3|MAP3K7|NRAS|RAP1A|CHUK|ABI1|APRT|GDI2|PSME1|DNM2|XRCC5|WASF1|PPP3CB|ARPC1B|DDOST|RHOA|SHC1|POLR2H|PPP2R5D|MYO10|ATP6V1C1|CFL1|CAN…
KEGG Pathways	Inositol phosphate metabolism	0.0062	3031	0.0013	0.220761	hsa00562	72	8	PLCG1|PI4KA|PIK3C2A|INPPL1|PLCB1|PIP4K2A|PLCB3|PIP5K1C
WikiPathways	Insulin signaling	4e-06	3031	7.17e-08	0.539794	WP481	159	20	SNAP23|MAP2K2|EHD2|CBL|PIK3C2A|PFKL|CYTH3|INPPL1|ARF6|CRK|MAP2K1|MAP4K4|MINK1|PTPRF|MAP3K7|STXBP3|STXBP1|SHC1|SLC2A1|EHD1
KEGG Pathways	Insulin signaling pathway	0.003	3031	0.00049	0.252288	hsa04910	132	12	PYGB|MAP2K2|CBL|PRKAR2A|INPPL1|CRK|MAP2K1|EXOC7|PTPRF|NRAS|SHC1|PRKAB1
GO Cellular Component	Insulin-responsive compartment	0.0359	3031	0.0035	0.144491	GO:0032593	9	3	RAB10|RAB12|RAB13
GO Cellular Component	Integral component of presynaptic active zone membrane	0.0027	3031	0.00019	0.256864	GO:0099059	16	5	CANX|CDH2|NRG1|ATP2B4|ATP2B1
COMPARTMENTS	Integral component of presynaptic membrane	0.0315	3031	0.002	0.150169	GOCC:0099056	7	3	CDH2|NRG1|ATP2B1
Reactome Pathways	Integration of energy metabolism	0.00034	3031	2.13e-05	0.346852	HSA-163685	108	13	PRKAR2A|IQGAP1|GNAQ|GNAI2|PPP2R1A|PLCB1|ACSL4|RAP1A|STXBP1|TKT|SLC2A1|PPP2R5D|PLCB3
UniProt Keywords	Integrin	0.00043	3031	2.16e-05	0.336653	KW-0401	26	7	ITGAV|ITGA5|ITGB5|ITGA2|ITGA3|ITGB1|ITGA7
SMART Domains	Integrin alpha (beta-propellor repeats).	0.0179	3031	0.00037	0.174715	SM00191	19	5	ITGAV|ITGA5|ITGA2|ITGA3|ITGA7
InterPro Domains	Integrin alpha beta-propellor	0.0433	3031	0.00037	0.136351	IPR013519	19	5	ITGAV|ITGA5|ITGA2|ITGA3|ITGA7
InterPro Domains	Integrin alpha chain	0.0378	3031	0.0003	0.142251	IPR000413	18	5	ITGAV|ITGA5|ITGA2|ITGA3|ITGA7
InterPro Domains	Integrin alpha chain, C-terminal cytoplasmic region, conserved site	0.0243	3031	0.00019	0.161439	IPR018184	16	5	ITGAV|ITGA5|ITGA2|ITGA3|ITGA7
InterPro Domains	Integrin alpha-2	0.0378	3031	0.0003	0.142251	IPR013649	18	5	ITGAV|ITGA5|ITGA2|ITGA3|ITGA7
GO Cellular Component	Integrin alpha3-beta1 complex	0.0419	3031	0.0041	0.137779	GO:0034667	2	2	ITGA3|ITGB1
GO Cellular Component	Integrin alpha5-beta1 complex	0.0419	3031	0.0041	0.137779	GO:0034674	2	2	ITGA5|ITGB1
COMPARTMENTS	Integrin alpha7-beta1 complex	0.0071	3031	0.00036	0.214874	GOCC:0034677	3	3	ITGB1|DAG1|ITGA7
GO Cellular Component	Integrin alphav-beta5 complex	0.0419	3031	0.0041	0.137779	GO:0034684	2	2	ITGAV|ITGB5
GO Molecular Function	Integrin binding	0.0131	3031	0.00023	0.188273	GO:0005178	159	14	ITGAV|NRG1|ITGA5|ITGB5|ITGA2|MMP14|ITGA3|PTK2|FERMT2|UTRN|ANXA7|ITGB1|ITGA7|TLN2
COMPARTMENTS	Integrin complex	0.0032	3031	0.00014	0.249485	GOCC:0008305	50	8	ITGAV|ITGA5|ITGB5|ITGA2|ITGA3|ITGB1|DAG1|ITGA7
GO Cellular Component	Integrin complex	0.00075	3031	4.76e-05	0.312494	GO:0008305	30	7	ITGAV|ITGA5|ITGB5|ITGA2|ITGA3|ITGB1|ITGA7
InterPro Domains	Integrin domain superfamily	0.0035	3031	1.75e-05	0.245593	IPR032695	25	7	ITGAV|ITGA5|ITGB5|ITGA2|ITGA3|ITGB1|ITGA7
STRING Clusters	Integrin domain superfamily	0.00057	3031	3.38e-06	0.324413	CL:19594	11	6	ITGAV|ITGA5|ITGB5|ITGA2|ITGA3|ITGB1
Reactome Pathways	Integrin signaling	0.0117	3031	0.0015	0.193181	HSA-354192	27	5	CSK|CRK|PTK2|RAP1A|SHC1
WikiPathways	Integrin-mediated cell adhesion	2.02e-10	3031	1.03e-12	0.969465	WP185	99	22	CSK|VASP|ITGAV|MAP2K2|PXN|ITGA5|ITGB5|ITGA2|CRK|MAP2K1|PAK2|ITGA3|PTK2|FYN|MYPN|RAP1A|ITGB1|ILK|SHC1|ITGA7|CDC42|CAPN5
GO Biological Process	Integrin-mediated signaling pathway	2.59e-05	3031	4.2e-07	0.45867	GO:0007229	100	15	ITGAV|CUL3|NRP1|ITGA5|ITGB5|ITGA2|CTNNA1|ITGA3|PTK2|FERMT2|ITGB1|ILK|ERBIN|ITGA7|CDC42
TISSUES	Integument	1.73e-15	3031	2.42e-17	1.4762	BTO:0000634	2112	128	ARF5|RANBP9|PSMC4|EFNB1|PYGB|AHCY|RIPK2|TBC1D17|CDC37|NAMPT|SERPINE1|ARPC3|VASP|CANX|LGALS3|CCNB1|ARF3|CCT7|ITGAV|PSMC1|RAB2A|MAP2K2|PACSIN2|TUBB4A|CUL3|RAB7A|SRI|PXN|CCT6A|NONO|USP15|FLCN|GNAQ|BAX|ITGB5|RPN1|ANXA5|ITGA2|ARF6|CTNNA1|DDX19A|MMP14|SRP68|GNAI2|RPS15A|UGDH|NUDC|NQO1|PKM|CTNNAL1|DCBLD2|PPP2R1A|COPG1|LASP1|RIC8A|BGN|HGS|EZR|PTK2|TUBB4B|RPS2|FRMD6|CTSB|ANXA2|RPS3A|PDLIM7|PLS3|EPHB4|EPHA…
Monarch Phenotype	Intellectual disability	0.0035	3031	3.38e-05	0.245593	HP:0001249	1656	74	EFNB1|SNAP29|AHCY|RP2|AIMP2|GALK1|SLC1A4|PMPCB|PI4KA|MPP5|TAOK1|AARS1|SLC12A2|MAP2K2|ARCN1|TUBB4A|ACAT1|CDH11|CDH2|SCYL1|NONO|ANK3|QDPR|GNAQ|CSTB|HPRT1|DIP2B|MAP2K1|YWHAG|MMP14|FMN2|MPDZ|TUBB3|PPP2R1A|FTSJ1|EPB41L1|EZR|ACSL4|PSMD12|AP1B1|ANKLE2|GMPPA|LONP1|CYB5R3|KIF14|MAP3K7|NRAS|NSDHL|STXBP1|FGD1|NHS|SBF1|WASF1|FAT4|TKT|GDI1|RAB3GAP1|RPL10|SLC2A1|GPHN|PPP2R5D|FLNB|TENM3|DAG1|ITGA7|ACTG1|YAP1|AD…
Monarch Phenotype	Intellectual disability, mild	0.006	3031	7.73e-05	0.222185	HP:0001256	351	24	MPP5|TAOK1|SLC12A2|ACAT1|SCYL1|NONO|ANK3|CSTB|HPRT1|FMN2|FTSJ1|EPB41L1|EZR|PSMD12|MAP3K7|NSDHL|STXBP1|FGD1|FAT4|TKT|SLC2A1|DAG1|TTC37|MTHFD1
Monarch Phenotype	Intellectual disability, moderate	0.019	3031	0.00033	0.172125	HP:0002342	228	17	TAOK1|SLC12A2|CDH11|ANK3|HPRT1|FMN2|TUBB3|FTSJ1|EPB41L1|EZR|ACSL4|STXBP1|NHS|FAT4|GDI1|PPP2R5D|CASK
GO Cellular Component	Intercalated disc	0.0023	3031	0.00016	0.263827	GO:0014704	51	8	SLC9A1|CDH2|ANK3|CTNNA1|DLG1|ITGB1|SLC2A1|CTNNB1
COMPARTMENTS	Intercellular bridge	0.025	3031	0.0015	0.160206	GOCC:0045171	92	9	RAB35|EHD2|TUBB4A|TUBB6|TUBB3|TUBB4B|PHLDB1|SEPTIN8|SEPTIN2
GO Cellular Component	Intercellular bridge	0.048	3031	0.005	0.131876	GO:0045171	91	8	RAB35|EHD2|TUBB4A|TUBB6|TUBB3|TUBB4B|PHLDB1|SEPTIN2
Monarch Phenotype	Interictal EEG abnormality	0.0231	3031	0.00042	0.163639	HP:0025373	278	19	AIMP2|SLC1A4|PI4KA|AARS1|SLC12A2|CSTB|YWHAG|FMN2|UGDH|PLCB1|EZR|LONP1|STXBP1|ASNS|RPL10|SLC2A1|DAG1|PHGDH|CASK
Monarch Phenotype	Interictal epileptiform activity	0.0442	3031	0.00099	0.135458	HP:0011182	276	18	AIMP2|SLC1A4|PI4KA|AARS1|SLC12A2|CSTB|YWHAG|FMN2|UGDH|PLCB1|EZR|LONP1|STXBP1|ASNS|SLC2A1|DAG1|PHGDH|CASK
Reactome Pathways	Interleukin-1 family signaling	0.0016	3031	0.00012	0.279588	HSA-446652	149	14	PSMC4|TAB1|PSMD10|RIPK2|PSMA2|PSMC1|PSMD11|MAP2K1|PSMD12|CASP8|PTPN14|MAP3K7|CHUK|PSME1
Reactome Pathways	Interleukin-1 signaling	0.00042	3031	2.77e-05	0.337675	HSA-9020702	111	13	PSMC4|TAB1|PSMD10|RIPK2|PSMA2|PSMC1|PSMD11|MAP2K1|PSMD12|CASP8|MAP3K7|CHUK|PSME1
WikiPathways	Interleukin-11 signaling pathway	0.0012	3031	6.53e-05	0.292082	WP2332	44	8	MAP2K2|ITGA2|MAP2K1|FYN|CHUK|IL6ST|YES1|JAK1
Reactome Pathways	Interleukin-12 family signaling	6.23e-06	3031	2.15e-07	0.520551	HSA-447115	56	12	RALA|CANX|PAK2|TCP1|ANXA2|MSN|IL6ST|CFL1|CNN2|MTAP|CDC42|JAK1
Reactome Pathways	Interleukin-12 signaling	4.58e-05	3031	1.99e-06	0.433913	HSA-9020591	46	10	RALA|PAK2|TCP1|ANXA2|MSN|CFL1|CNN2|MTAP|CDC42|JAK1
Reactome Pathways	Interleukin-27 signaling	0.0342	3031	0.0055	0.146597	HSA-9020956	11	3	CANX|IL6ST|JAK1
Reactome Pathways	Interleukin-3, Interleukin-5 and GM-CSF signaling	0.0059	3031	0.00062	0.222915	HSA-512988	48	7	CBL|INPPL1|CRK|FYN|SHC1|YES1|JAK1
Reactome Pathways	Interleukin-35 Signalling	0.0401	3031	0.0068	0.139686	HSA-8984722	12	3	CANX|IL6ST|JAK1
Reactome Pathways	Interleukin-6 signaling	0.0342	3031	0.0055	0.146597	HSA-1059683	11	3	CBL|IL6ST|JAK1
TISSUES	Internal female genital organ	1.05e-39	3031	6.48e-42	3.89788	BTO:0003099	2804	207	TPD52L2|AHCY|PSMD10|CSK|CDC37|SERPINE1|PSMA2|ACTA2|SLC25A11|LRRC59|RAB35|EXOC2|SNX17|ADGRE5|CANX|SNAP23|TSG101|CNN1|PI4KA|CCNB1|ARF3|TAOK1|AARS1|SNX1|COTL1|EHD2|NAPA|SLC9A1|EHBP1|TUBB4A|CUL3|RAB10|PDCD6|RAB7A|TNPO3|PXN|IQGAP1|ARL8A|RASA1|EGFR|NONO|VPS51|CCT5|USP15|ANK3|SH3RF1|AKR1B1|GNAQ|ZDHHC5|CSTB|ITGA5|RPN1|ANXA5|CYTH3|ARF6|STAT6|CRK|CTNNA1|MMP14|RAB1B|ACAD9|GNAI2|DNAJA2|PAK2|ITGA3|RPS15A|TUBB…
TISSUES	Internal male genital organ	2.43e-12	3031	3.7e-14	1.16144	BTO:0003096	2388	130	RANBP9|AHCY|ACTA2|RPL19|SNX17|DDX39A|PLCG1|CANX|SNAP23|CNN1|ARF3|CCT7|ITGAV|PSMC1|IPO5|ANKRD13A|HACD3|NAPA|PPP1R12C|FARP2|TUBB4A|CUL3|PRKAR2A|IDE|PXN|CDH2|SCYL1|RASA1|NONO|CCT5|GNAQ|RPN1|ANXA5|ERAP1|CTNNA1|SEC23A|GNAI2|ITGA3|TCP1|VPS37A|PKM|PPP2R1A|RIC8A|EIF4A2|AP2A2|ACSL4|SEPTIN6|RPS2|MAP4K4|CTSB|ANXA2|RPLP1|RPS3A|ATG7|PLS3|PSMD12|ANKLE2|PCBP2|MYLK|CYB5R3|UTRN|TAGLN2|RARS2|NIBAN2|PHACTR4|HSPA1L|…
TISSUES	Interstitial cell of Cajal	8.87e-11	3031	1.68e-12	1.00521	BTO:0003914	193	29	PSMA2|CCT7|COTL1|ACTR3|CCT6A|CCT5|AKR1B1|YWHAG|TCP1|PKM|TUBB3|TUFM|PPP2R1A|PARK7|DPYSL3|ITPA|FSCN1|TAGLN3|GDI1|MPST|CFL1|TUBA1C|RAN|ACTG1|SEPTIN2|ENO1|PCMT1|EIF4A3|CDC42
TISSUES	Intestine	0.00035	3031	1.21e-05	0.345593	BTO:0000648	1349	65	DVL2|PYGB|AK1|ACTA2|RPL19|CD82|CNN1|HIP1R|CCNB1|CCT7|HACD3|SLC12A2|TUBB4A|PDCD6|TNPO3|SRI|NONO|NRG1|CTNNA1|TCP1|NQO1|PKM|PPP2R1A|EIF4A2|PLS1|EZR|RPS2|CTSB|ANXA2|RPS3A|TPM1|MYLK|CMPK1|ACOT7|AHNAK|SNX2|SLC25A6|TAGLN|ILK|RAB1A|PPP1R12A|TKT|ATP2B1|RHOA|RPL6|AFAP1|RPL10|PPP2R5D|FLNB|CLINT1|CFL1|TUBA1C|SLC1A5|ATP1A1|ACTG1|RSL1D1|COASY|SERPINB6|UBAP1|DOCK10|MTAP|RPL9|CTNNB1|ENO1|TPM2
Reactome Pathways	Intra-Golgi and retrograde Golgi-to-ER traffic	0.00014	3031	7.56e-06	0.385387	HSA-6811442	201	19	ARF5|SNAP29|YKT6|ARF3|NAPA|ARCN1|TUBB4A|VPS51|CYTH3|RAB1B|TUBB6|TUBB3|NAPG|COPG1|TUBB4B|RAB1A|RAB3GAP1|TUBA1C|COPE
Reactome Pathways	Intra-Golgi traffic	0.0498	3031	0.0088	0.130277	HSA-6811438	43	5	SNAP29|YKT6|NAPA|CYTH3|NAPG
COMPARTMENTS	Intracellular	7.14e-51	3031	9.31e-54	5.01463	GOCC:0005622	11512	480	RALA|BAIAP2L1|DVL2|RANBP9|MRI1|PSMC4|YTHDC2|SNAP29|TAB1|PYGB|TPD52L2|AHCY|PSMD10|RP2|CSK|EHD4|RIPK2|TBC1D17|CDC37|NAMPT|SNX8|AIMP2|SERPINE1|PSMA2|YKT6|SEC61B|AK1|ACTA2|RPL19|GALK1|SLC25A11|LRRC59|ARPC3|RAB35|EXOC2|SNX17|DOK1|SLC1A4|DDX39A|PLCG1|VASP|TRAP1|CANX|CDC42EP1|PMPCB|SNAP23|TSG101|CNN1|HIP1R|GRWD1|EXOC4|WDR44|LGALS3|EFR3A|PI4KA|RRAS2|CCNB1|NOTCH2|ARF3|PRPH|CCT7|TBRG4|ITGAV|PSMC1|IPO5|MPP5…
GO Cellular Component	Intracellular anatomical structure	4.79e-32	3031	3.27e-34	3.13197	GO:0005622	14891	514	ARF5|RALA|BAIAP2L1|DVL2|RANBP9|MRI1|PSMC4|YTHDC2|EFNB1|SNAP29|TAB1|PYGB|TPD52L2|AHCY|PSMD10|RP2|CSK|EHD4|RIPK2|TBC1D17|CDC37|NAMPT|SNX8|AIMP2|SERPINE1|PSMA2|YKT6|SEC61B|AK1|ACTA2|RPL19|GALK1|SLC25A11|LRRC59|ARPC3|RAB35|EXOC2|SNX17|DOK1|SLC1A4|DDX39A|ADGRE5|PLCG1|VASP|TRAP1|CANX|CDC42EP1|PMPCB|SNAP23|TSG101|CNN1|NUMBL|HIP1R|GRWD1|EXOC4|WDR44|LGALS3|EFR3A|PI4KA|RRAS2|CCNB1|NOTCH2|ARF3|PRPH|CCT7|TBR…
COMPARTMENTS	Intracellular membrane-bounded organelle	4.1e-06	3031	1.05e-07	0.538722	GOCC:0043231	8162	285	RALA|BAIAP2L1|DVL2|RANBP9|MRI1|PSMC4|YTHDC2|SNAP29|TAB1|PYGB|PSMD10|EHD4|NAMPT|SNX8|PSMA2|YKT6|SEC61B|RPL19|SLC25A11|LRRC59|ARPC3|RAB35|SNX17|DOK1|DDX39A|PLCG1|TRAP1|CANX|PMPCB|SNAP23|TSG101|HIP1R|GRWD1|WDR44|LGALS3|PI4KA|RRAS2|CCNB1|NOTCH2|ARF3|TBRG4|PSMC1|IPO5|ANKRD13A|PDGFRB|HACD3|SNX1|SMURF2|RAB2A|AJUBA|MAP2K2|ACTR3|PACSIN2|EHD2|ARCN1|CBL|CUL3|RAPGEF2|RAB10|PDCD6|RAB7A|NRP1|TNPO3|SRI|ACAT1|PI…
GO Cellular Component	Intracellular membrane-bounded organelle	9.11e-07	3031	3.21e-08	0.604048	GO:0043231	12149	394	ARF5|RALA|BAIAP2L1|DVL2|RANBP9|MRI1|PSMC4|YTHDC2|EFNB1|SNAP29|TAB1|PYGB|AHCY|PSMD10|RP2|EHD4|TBC1D17|NAMPT|SNX8|AIMP2|SERPINE1|PSMA2|YKT6|SEC61B|RPL19|SLC25A11|LRRC59|ARPC3|RAB35|SNX17|DOK1|SLC1A4|DDX39A|ADGRE5|PLCG1|TRAP1|CANX|PMPCB|SNAP23|TSG101|HIP1R|GRWD1|WDR44|LGALS3|PI4KA|RRAS2|CCNB1|NOTCH2|ARF3|TBRG4|ITGAV|PSMC1|IPO5|MPP5|PSMD11|ANKRD13A|AARS1|PDGFRB|HACD3|SNX1|COTL1|SMURF2|SLC12A2|RAB2A|A…
COMPARTMENTS	Intracellular non-membrane-bounded organelle	9.95e-16	3031	1.17e-17	1.50022	GOCC:0043232	3309	173	RANBP9|MRI1|YTHDC2|SNAP29|PSMD10|RP2|RIPK2|PSMA2|AK1|ACTA2|RPL19|LRRC59|ARPC3|SLC1A4|VASP|TSG101|CNN1|GRWD1|CCNB1|PRPH|CCT7|IPO5|AJUBA|MAP2K2|ACTR3|EHBP1|TUBB4A|CUL3|PRKAR2A|SRI|PXN|IQGAP1|CDH2|SCYL1|ARL8A|CCT6A|NONO|CCT5|ANK3|FLCN|MYO1E|IGF2BP1|CSTB|AXL|CTNNA1|MMP14|SRP68|GNAI2|TCP1|VPS37A|RPS15A|TUBB6|FMN2|NUDC|TUBB3|LLGL1|TUFM|PPP2R1A|LASP1|NEXN|EXOC7|PLS1|EPB41L1|BRIX1|EZR|ACSL4|PARK7|PTK2|TU…
GO Cellular Component	Intracellular non-membrane-bounded organelle	1.12e-15	3031	1.75e-17	1.49508	GO:0043232	5191	235	BAIAP2L1|RANBP9|MRI1|YTHDC2|SNAP29|PSMD10|RP2|RIPK2|PSMA2|AK1|ACTA2|RPL19|LRRC59|ARPC3|SLC1A4|VASP|CANX|CDC42EP1|TSG101|CNN1|HIP1R|GRWD1|CCNB1|PRPH|CCT7|TBRG4|IPO5|TAOK1|COTL1|AJUBA|MAP2K2|ACTR3|PACSIN2|EHD2|PPP1R12C|EHBP1|FARP2|TUBB4A|CUL3|RAB10|RAB7A|NRP1|PRKAR2A|SRI|PXN|IQGAP1|SCYL1|ARL8A|CCT6A|NONO|VPS51|CCT5|ANK3|FLCN|MYO1E|IGF2BP1|CSTB|ABI2|RAPGEF6|DNAAF5|INPPL1|STAT6|CRK|AXL|MAP2K1|CTNNA1|…
COMPARTMENTS	Intracellular organelle	1.67e-21	3031	8.72e-24	2.07773	GOCC:0043229	9609	380	RALA|BAIAP2L1|DVL2|RANBP9|MRI1|PSMC4|YTHDC2|SNAP29|TAB1|PYGB|PSMD10|RP2|EHD4|RIPK2|TBC1D17|NAMPT|SNX8|SERPINE1|PSMA2|YKT6|SEC61B|AK1|ACTA2|RPL19|SLC25A11|LRRC59|ARPC3|RAB35|SNX17|DOK1|SLC1A4|DDX39A|PLCG1|VASP|TRAP1|CANX|PMPCB|SNAP23|TSG101|CNN1|HIP1R|GRWD1|WDR44|LGALS3|PI4KA|RRAS2|CCNB1|NOTCH2|ARF3|PRPH|CCT7|TBRG4|ITGAV|PSMC1|IPO5|PSMD11|ANKRD13A|PDGFRB|HACD3|SNX1|COTL1|SMURF2|RAB2A|AJUBA|MAP2K2|…
GO Cellular Component	Intracellular organelle	2.93e-14	3031	5.44e-16	1.35331	GO:0043229	13231	447	ARF5|RALA|BAIAP2L1|DVL2|RANBP9|MRI1|PSMC4|YTHDC2|EFNB1|SNAP29|TAB1|PYGB|AHCY|PSMD10|RP2|EHD4|RIPK2|TBC1D17|NAMPT|SNX8|AIMP2|SERPINE1|PSMA2|YKT6|SEC61B|AK1|ACTA2|RPL19|SLC25A11|LRRC59|ARPC3|RAB35|SNX17|DOK1|SLC1A4|DDX39A|ADGRE5|PLCG1|VASP|TRAP1|CANX|CDC42EP1|PMPCB|SNAP23|TSG101|CNN1|HIP1R|GRWD1|WDR44|LGALS3|PI4KA|RRAS2|CCNB1|NOTCH2|ARF3|PRPH|CCT7|TBRG4|ITGAV|PSMC1|IPO5|MPP5|PSMD11|TAOK1|ANKRD13A|A…
GO Cellular Component	Intracellular organelle lumen	0.0022	3031	0.00015	0.265758	GO:0070013	5660	195	BAIAP2L1|DVL2|RANBP9|MRI1|PSMC4|SNAP29|TAB1|PYGB|PSMD10|RP2|NAMPT|SERPINE1|PSMA2|RPL19|LRRC59|DDX39A|TRAP1|CANX|PMPCB|SNAP23|TSG101|GRWD1|LGALS3|CCNB1|NOTCH2|TBRG4|PSMC1|IPO5|PSMD11|PDGFRB|COTL1|SMURF2|AJUBA|PACSIN2|SLC9A1|EHBP1|CUL3|PDCD6|CDH6|SRI|ACAT1|PIK3C2A|IDE|CDH2|PFKL|EGFR|NONO|VPS51|USP15|AKR1B1|UBE2L6|NRG1|IGF2BP1|CSTB|ABI2|ERAP1|CYTH3|INPPL1|COPS2|STAT6|DDX19A|MMP14|SRP68|CSPG4|GNAI2|C…
GO Biological Process	Intracellular protein transport	3.41e-07	3031	3.57e-09	0.646725	GO:0006886	683	49	ARF5|CDC37|SNX8|SEC61B|SNX17|PMPCB|TSG101|ARF3|IPO5|SNX1|NAPA|ARCN1|PDCD6|RAB7A|TNPO3|VPS37B|BAX|ARF6|BCR|YWHAG|SEC23A|RAB1B|SRP68|VPS37A|NAPG|COPG1|AP2A2|XPOT|HGS|SCRIB|AP1B1|AP2A1|IPO9|STXBP3|STK4|STXBP1|PARD3|SNX2|SNX9|GIPC1|SEC31A|RAB1A|CDK5|ERBIN|C2CD5|RAN|EHD1|UBAP1|RPL11
GO Biological Process	Intracellular signal transduction	1.31e-11	3031	5.52e-14	1.08827	GO:0035556	1518	96	RALA|DVL2|RIPK2|RAB35|DOK1|PLCG1|CDC42EP1|PI4KA|RRAS2|BCAR3|ITGAV|TAOK1|PDGFRB|HACD3|AJUBA|MAP2K2|SLC9A1|FARP2|CUL3|RAPGEF2|PRKAR2A|PIK3C2A|RALB|RASA1|EGFR|DOCK11|FLCN|NRG1|BAX|ABI2|RAPGEF6|AXL|MAP2K1|BCR|ABR|ARHGAP1|CSPG4|PAK2|ITGA3|DNMBP|FMN2|RAP2B|CTNNAL1|PPP2R1A|RAB12|RASA3|ARHGEF1|PLCB1|EZR|PARK7|TP53BP2|MAP4K4|DLG1|FYN|MINK1|EPHA2|NCKAP1|IQGAP3|TIPRL|ARHGAP18|RAB13|MAP3K7|NRAS|RAP1A|CHUK|PK…
Reactome Pathways	Intracellular signaling by second messengers	0.0101	3031	0.0012	0.199568	HSA-9006925	306	19	PSMC4|PSMD10|PSMA2|PLCG1|PSMC1|PSMD11|PDGFRB|PRKAR2A|EGFR|NRG1|MET|PPP2R1A|FYN|PSMD12|CHUK|PIP4K2A|PSME1|PPP2R5D|PIP5K1C
GO Biological Process	Intracellular transport	1.35e-10	3031	7.05e-13	0.986967	GO:0046907	1365	87	ARF5|EHD4|TBC1D17|CDC37|SNX8|YKT6|SEC61B|RAB35|SNX17|DDX39A|PMPCB|TSG101|HIP1R|ARF3|IPO5|SNX1|RAB2A|EHD2|NAPA|SLC9A1|ARCN1|CUL3|RAB10|PDCD6|RAB7A|TNPO3|VPS37B|ARL8A|VPS51|MYO1E|BAX|ARF6|BCR|DDX19A|YWHAG|SEC23A|RAB1B|ARHGAP1|SRP68|VPS37A|FMN2|NUDC|NAPG|COPG1|AP2A2|XPOT|HGS|RAB12|RAB11B|SNX18|ITSN2|SCRIB|AP1B1|AP2A1|IPO9|VTA1|RAB13|STXBP3|STK4|STXBP1|PARD3|PIP4K2A|SNX2|SLC25A6|SNX9|WASF1|GIPC1|PICA…
COMPARTMENTS	Intrinsic component of synaptic membrane	0.028	3031	0.0017	0.155284	GOCC:0099240	16	4	CDH2|NRG1|ATP2B1|GPHN
GO Molecular Function	Ion binding	1.79e-07	3031	1.71e-09	0.674715	GO:0043167	6033	232	ARF5|RALA|PSMC4|YTHDC2|PYGB|RP2|CSK|EHD4|RIPK2|AK1|ACTA2|GALK1|RAB35|DDX39A|ADGRE5|PLCG1|TRAP1|CANX|PMPCB|HIP1R|PI4KA|RRAS2|NOTCH2|ARF3|CCT7|ITGAV|PSMC1|MPP5|TAOK1|AARS1|PDGFRB|RAB2A|AJUBA|MAP2K2|ACTR3|PACSIN2|EHD2|SLC9A1|CBL|TUBB4A|RAPGEF2|RAB10|PDCD6|RAB7A|CDH6|NRP1|PRKAR2A|SRI|ACAT1|PIK3C2A|IDE|PXN|IQGAP1|CDH11|CDH2|PFKL|SCYL1|ARL8A|RALB|EGFR|CCT6A|CCT5|QDPR|SH3RF1|GNAQ|UBE2L6|MYO1E|ITGA5|ANXA…
UniProt Keywords	Isopeptide bond	8.02e-05	3031	3.58e-06	0.409583	KW-1017	1717	80	RIPK2|ACTA2|RPL19|ARPC3|DDX39A|CCT7|PSMC1|PSMD11|TUBB4A|CUL3|EGFR|CCT6A|NONO|CCT5|RPN1|ANXA5|HPRT1|CTNNA1|DDX19A|DNAJA2|TUBB6|BASP1|NQO1|PKM|TUBB3|HNRNPM|BRIX1|PARK7|PTK2|TUBB4B|RPS2|ANXA2|RPS3A|PSMD12|PCBP2|CALD1|TAGLN2|EPB41L2|MAP3K7|NRAS|NOC3L|CMPK1|AMOT|PALM2AKAP2|EIF2S2|AHNAK|MYBBP1A|FSCN1|XRCC5|LUC7L3|PICALM|RPL34|PFDN6|SEC31A|ITGB1|CTNND1|AKAP12|NFATC4|TKT|FCHO2|RPL6|RPL10|CUL2|DDX46|FLNB|…
Monarch Phenotype	Joint hypermobility	0.0491	3031	0.0011	0.130892	HP:0001382	279	18	EFNB1|RRAS2|NOTCH2|MPP5|SLC12A2|CBL|SEC23A|VPS37A|PPP2R1A|BGN|PSMD12|LONP1|NRAS|NSDHL|FGD1|WASF1|RAB3GAP1|FLNB
KEGG Pathways	Kaposi sarcoma-associated herpesvirus infection	0.024	3031	0.0073	0.161979	hsa05167	187	12	PLCG1|MAP2K2|BAX|MAP2K1|CASP8|NRAS|CHUK|IL6ST|PPP3CB|NFATC4|CTNNB1|JAK1
Reactome Pathways	KEAP1-NFE2L2 pathway	0.00093	3031	6.94e-05	0.303152	HSA-9755511	105	12	PSMC4|PSMD10|PSMA2|PSMC1|PSMD11|CUL3|PGD|NQO1|PSMD12|PSME1|TKT|TXNRD1
TISSUES	Kidney	3.03e-10	3031	6.41e-12	0.951856	BTO:0000671	1039	71	TPD52L2|AHCY|SNX8|GRWD1|TBRG4|COTL1|SLC9A1|EHBP1|TUBB4A|RAB7A|CDH6|NRP1|PFKL|NONO|ANK3|AKR1B1|ATP5MF|ITGB5|CTNNA1|GNAI2|ITGA3|NUDC|PKM|TUFM|PPP2R1A|EIF4A2|BGN|EZR|PARK7|RPS2|CTSB|ANXA2|RPS3A|ATG7|PDLIM7|PLS3|KIRREL1|NRAS|CNN3|NEK6|CLIC4|PARD3|GDI2|SDC1|SNX9|SLC4A7|TKT|RHOA|RPL6|MPST|SEPTIN7|CUL2|GPHN|PPP2R5D|AMOTL2|CFL1|SERPINH1|PARP10|TUBA1C|SLC1A5|ATP1A1|PEAK1|ACTG1|SIRPA|SH3GLB1|UBAP1|COBLL1|P…
GO Biological Process	Kidney development	0.0018	3031	4.89e-05	0.274473	GO:0001822	296	22	ACTA2|SNX17|NOTCH2|PDGFRB|NRP1|ACAT1|IQGAP1|FLCN|AKR1B1|MYO1E|BAX|ITGA3|BASP1|DLG1|AP1B1|DLG5|BICC1|SDC1|ILK|RHOA|MPST|CTNNB1
UniProt Keywords	Kinase	9.71e-06	3031	3.76e-07	0.501278	KW-0418	634	42	CSK|RIPK2|AK1|GALK1|PI4KA|TAOK1|PDGFRB|MAP2K2|PIK3C2A|PFKL|EGFR|AXL|MAP2K1|BCR|PAK2|MET|PKM|PTK2|MAP4K4|FYN|MINK1|EPHB4|EPHA2|MYLK|CDC42BPA|MAP3K7|SLK|CHUK|PKN2|CMPK1|STK4|NEK6|PIP4K2A|ILK|EPHB2|CDK5|PBK|YES1|COASY|PIP5K1C|CASK|JAK1
GO Molecular Function	Kinase activator activity	0.0131	3031	0.00024	0.188273	GO:0019209	121	12	TAB1|CCNB1|TAOK1|MAP2K2|IQGAP1|EGFR|NRG1|MAP2K1|PAK2|RPLP1|STK4|ABI1
GO Molecular Function	Kinase activity	2.53e-07	3031	2.46e-09	0.659688	GO:0016301	788	54	TAB1|CSK|RIPK2|AK1|GALK1|PI4KA|TAOK1|PDGFRB|MAP2K2|NRP1|PRKAR2A|PIK3C2A|PFKL|SCYL1|EGFR|AXL|MAP2K1|BCR|ABR|PAK2|MET|PKM|HGS|PTK2|MAP4K4|DLG1|FYN|MINK1|EPHB4|EPHA2|MYLK|CDC42BPA|MAP3K7|MPP1|SLK|CHUK|PKN2|CMPK1|STK4|NEK6|PIP4K2A|ILK|EPHB2|CDK5|PBK|TJP2|PRKAB1|PEAK1|YES1|COASY|PIP5K1C|PPP1R9B|CASK|JAK1
GO Molecular Function	Kinase binding	9.4e-12	3031	5.91e-14	1.10269	GO:0019900	785	64	DVL2|TAB1|CSK|CDC37|ACTA2|EXOC2|PLCG1|TRAP1|CCNB1|BCAR3|ITGAV|PDGFRB|SLC12A2|PPP1R12C|CBL|NRP1|PRKAR2A|IQGAP1|CDH2|PFKL|EGFR|NRG1|ABI2|CRK|YWHAG|CSPG4|PAK2|LLGL1|AP2A2|EZR|PARK7|PTK2|FERMT2|DLG1|AP1B1|ATP2B4|AP2A1|MSN|PTPN14|KIF14|UTRN|GLRX3|MAP3K7|STXBP1|NEK6|MAPRE1|TRIM5|DNM2|ITGB1|ILK|CTNND1|PPP1R12A|RHOA|SHC1|SLC2A1|CDK5|PTPRK|TJP2|PRKAB1|SIRPA|PPP1R9B|RPS7|CTNNB1|CDC42
WikiPathways	T-cell receptor signaling pathway	0.0013	3031	8.02e-05	0.288606	WP69	90	11	RIPK2|PLCG1|MAP2K2|CBL|CRK|MAP2K1|FYN|MAP3K7|CHUK|SHC1|CDC42
GO Biological Process	Ephrin receptor signaling pathway	0.00022	3031	4.47e-06	0.365758	GO:0048013	51	10	EFNB1|RASA1|CRK|PTK2|FYN|EPHB4|EPHA2|EPHB2|SIPA1L1|YES1
Reactome Pathways	L13a-mediated translational silencing of Ceruloplasmin expression	1.85e-06	3031	4.85e-08	0.573283	HSA-156827	110	17	RPL19|RPS15A|EIF4A2|RPS2|RPLP1|RPS3A|EIF2S2|EIF1AX|RPL34|RPL6|RPL10|RPS13|RPS4Y2|RPL9|RPS7|RPL11|RPS27
Reactome Pathways	L1CAM interactions	7.22e-11	3031	6.96e-13	1.01415	HSA-373760	120	24	RANBP9|ITGAV|MAP2K2|TUBB4A|NRP1|EGFR|ANK3|ITGA5|ITGA2|MAP2K1|TUBB6|TUBB3|AP2A2|EZR|TUBB4B|DLG1|AP2A1|MSN|DNM2|ITGB1|EPHB2|TUBA1C|ACTG1|RDX
InterPro Domains	L27 domain	0.0142	3031	8.53e-05	0.184771	IPR004172	13	5	MPP6|MPP5|MPDZ|DLG1|CASK
InterPro Domains	L27 domain superfamily	0.0142	3031	8.53e-05	0.184771	IPR036892	13	5	MPP6|MPP5|MPDZ|DLG1|CASK
STRING Clusters	L27 domain, and Establishment or maintenance of epithelial cell apical/basal polarity	0.023	3031	0.00047	0.163827	CL:21805	32	6	MPP5|LLGL1|SCRIB|DLG5|PARD3|CASK
COMPARTMENTS	Lamellipodium	2.49e-18	3031	1.84e-20	1.76038	GOCC:0030027	124	33	ARPC3|PLCG1|VASP|ITGAV|ACTR3|SLC9A1|PXN|CDH2|SH3RF1|ABI2|TUBB3|DPYSL3|EPHA2|MYLK|NCKAP1|CDC42BPA|RAB13|PKN2|AMOT|PHACTR4|FGD1|ABI1|NHS|FSCN1|WASF1|CORO1C|RHOA|CFL1|DAG1|PPP1R9B|CYFIP1|WASF2|RDX
GO Cellular Component	Lamellipodium	5.3e-28	3031	4.92e-30	2.72757	GO:0030027	203	51	ACTA2|ARPC3|PLCG1|VASP|ITGAV|SNX1|AJUBA|ACTR3|SLC9A1|PXN|CDH2|SH3RF1|IGF2BP1|ABI2|INPPL1|CTNNA1|CSPG4|TUBB3|MTSS2|FERMT2|DPYSL3|SCRIB|EPHA2|MYLK|NCKAP1|CDC42BPA|RAB13|PKN2|AMOT|PHACTR4|FGD1|ABI1|SNX2|NHS|FSCN1|DNM2|WASF1|ITGB1|ILK|CTNND1|CORO1C|RHOA|CDK5|MYO10|CFL1|DAG1|PPP1R9B|CYFIP1|WASF2|CTNNB1|RDX
GO Cellular Component	Lamellipodium membrane	0.00015	3031	8.67e-06	0.382391	GO:0031258	22	7	VASP|ITGAV|CSPG4|FERMT2|EPHA2|NCKAP1|CFL1
GO Biological Process	Lamellipodium morphogenesis	0.00041	3031	9e-06	0.338722	GO:0072673	7	5	SNX1|ABI1|SNX2|WASF1|WASF2
GO Biological Process	Lamellipodium organization	0.00059	3031	1.37e-05	0.322915	GO:0097581	46	9	SNX1|AJUBA|MTSS2|ABI1|SNX2|WASF1|ITGB1|CYFIP1|WASF2
GO Molecular Function	Laminin binding	0.0134	3031	0.00025	0.18729	GO:0043236	28	6	LGALS3|ITGA2|ITGA3|ITGB1|DAG1|ITGA7
Reactome Pathways	Laminin interactions	0.0163	3031	0.0022	0.178781	HSA-3000157	30	5	ITGAV|ITGA2|ITGA3|ITGB1|ITGA7
Monarch Phenotype	Language impairment	0.0212	3031	0.00038	0.167366	HP:0002463	809	40	AIMP2|SLC1A4|PMPCB|PI4KA|MPP5|AARS1|SLC12A2|MAP2K2|CBL|TUBB4A|NONO|ANK3|DNAAF5|YWHAG|SEC23A|VPS37A|FMN2|TUBB3|PPP2R1A|FTSJ1|RAB11B|EZR|ACSL4|PSMD12|NRAS|RARS2|NSDHL|STXBP1|WASF1|TPRN|TKT|GDI1|RPL10|SLC2A1|PPP2R5D|TENM3|DAG1|ADSL|CASK|CDC42
Reactome Pathways	Late endosomal microautophagy	0.0245	3031	0.0036	0.161083	HSA-9615710	34	5	TSG101|VPS37B|VPS37A|PARK7|UBAP1
GO Biological Process	Late endosome to vacuole transport via multivesicular body sorting pathway	0.0067	3031	0.00021	0.217393	GO:0032511	27	6	TSG101|VPS37B|VPS37A|HGS|VTA1|UBAP1
COMPARTMENTS	Lateral plasma membrane	0.00043	3031	1.55e-05	0.336653	GOCC:0016328	35	8	SLC12A2|ANK3|PPP2R1A|RAB13|ABCC1|CORO1C|ATP1A1|CTNNB1
GO Cellular Component	Lateral plasma membrane	4.95e-06	3031	2.15e-07	0.530539	GO:0016328	68	13	DVL2|SLC12A2|IQGAP1|ANK3|PPP2R1A|DLG1|IQGAP3|RAB13|ABCC1|ATP2B1|CORO1C|ATP1A1|CTNNB1
COMPARTMENTS	Leading edge membrane	2.34e-06	3031	5.39e-08	0.563078	GOCC:0031256	97	16	PLCG1|VASP|HIP1R|ITGAV|EGFR|EZR|MTSS2|TPM1|EPHA2|NCKAP1|ITGB1|CFL1|PTPRK|C2CD5|PPP1R9B|EPS8
GO Cellular Component	Leading edge membrane	5.05e-09	3031	1.23e-10	0.829671	GO:0031256	173	25	PLCG1|VASP|HIP1R|ITGAV|PACSIN2|EGFR|CSPG4|EZR|MTSS2|FERMT2|TPM1|EPHA2|NCKAP1|DNM2|ITGB1|ATP2B1|CORO1C|RHOA|CFL1|PTPRK|C2CD5|PIP5K1C|PPP1R9B|EPS8|CDC42
Reactome Pathways	Leishmania infection	1.14e-06	3031	2.82e-08	0.59431	HSA-9658195	165	21	DVL2|ARPC3|PLCG1|ACTR3|PRKAR2A|ABI2|CRK|GNAI2|PTK2|FYN|NCKAP1|GNAI3|ABI1|WASF1|ARPC1B|MYO10|ACTG1|YES1|CYFIP1|WASF2|CDC42
WikiPathways	Leptin signaling pathway	0.00044	3031	1.98e-05	0.335655	WP2034	76	11	PLCG1|MAP2K2|BAX|MAP2K1|PTK2|FYN|CHUK|RHOA|SHC1|CDC42|JAK1
TISSUES	Leukemia cell	6.47e-16	3031	8.8e-18	1.51891	BTO:0001271	1067	85	DVL2|AHCY|NAMPT|SEC61B|RPL19|CD82|DDX39A|PLCG1|VASP|CANX|TSG101|NUMBL|NOTCH2|ITGAV|AARS1|MAP2K2|PPP1R12C|SLC9A1|CBL|CUL3|TNPO3|PXN|RASA1|NONO|CCT5|ANK3|ITGA5|ANXA5|ITGA2|BCR|PKM|LASP1|HNRNPM|EIF4A2|RASA3|ARHGEF1|PTK2|RPS3A|ATG7|FYN|ATP2B4|PCBP2|MSN|LONP1|AFDN|MAP3K7|MPP1|NRAS|YARS1|EIF2S2|PIP4K2A|APRT|GDI2|SBF1|SLC25A6|DNM2|GARS1|XRCC5|ASNS|CCT4|ITGB1|ABCC1|TKT|NFIC|SHC1|SEPTIN7|FNBP1|SLC2A1|CDK5…
TISSUES	Leukocyte	3.03e-10	3031	6.37e-12	0.951856	BTO:0000751	924	66	TPD52L2|RPL19|CD82|PLCG1|SNAP23|NOTCH2|CCT7|IPO5|ACTR3|SLC9A1|TUBB4A|PRKAR2A|CCT5|ERAP1|ARF6|MAP2K1|YWHAG|TCP1|RPS15A|PKM|TUFM|HNRNPM|PTK2|TUBB4B|RPS2|ANXA2|RPS3A|FYN|PSMD12|CASP8|PCBP2|CYB5R3|NIBAN1|EPB41L2|CHUK|MAPRE1|ABI1|PIP4K2A|AHNAK|SBF1|SLC25A6|GART|GARS1|ASNS|CCT4|NFATC4|PPP1R12A|ATP2B1|RPL6|RPL10|FNBP1|FLNB|CFL1|RAN|ACTG1|RSL1D1|SIRPA|HSPH1|PHGDH|RPL9|RPS7|ENO1|RPL11|EIF4A3|CDC42|MTHFD1
Monarch Phenotype	Leukocyte count	0.002	3031	1.59e-05	0.269897	EFO:0004308	2057	89	BAIAP2L1|CSK|EHD4|CDC37|ACTA2|GALK1|CD82|EXOC2|ADGRE5|TRAP1|CANX|NECTIN2|PI4KA|NOTCH2|BCAR3|PDGFRB|SLC12A2|RAB2A|MAP2K2|ARCN1|CBL|FARP2|RAB7A|IQGAP1|EGFR|ATP5MF|BAX|RPN1|RAPGEF6|STAT6|CRK|BCR|ABR|GNAI2|PAK2|CPNE1|MET|RASA3|PLCB1|MAP4K4|CTSB|ITSN2|MINK1|ATP2B4|ANKLE2|CASP8|PLXNB2|CDC42BPA|RAP1A|PDLIM1|DLG5|NIBAN2|NEK6|PALM2AKAP2|PIP4K2A|AHNAK|SEPTIN8|SNX2|SEC31A|WDR6|ABCC1|AKAP12|PPP1R12A|SLC4A7|T…
KEGG Pathways	Leukocyte transendothelial migration	1.08e-06	3031	5.46e-08	0.596658	hsa04670	111	17	PLCG1|VASP|CTNNA1|GNAI2|EZR|PTK2|MSN|AFDN|RAP1A|GNAI3|ITGB1|CTNND1|RHOA|ACTG1|CTNNB1|CDC42|ARHGAP35
UniProt Keywords	Ligase	0.0178	3031	0.0015	0.174958	KW-0436	131	11	AARS1|PFAS|FARSA|ACSL4|RARS2|YARS1|GART|GARS1|ASNS|GMPS|MTHFD1
GO Molecular Function	Ligase activity	0.0197	3031	0.00039	0.170553	GO:0016874	168	14	AARS1|PFAS|FARSA|ACSL4|ATG7|ATP5F1C|RARS2|YARS1|GART|GARS1|ASNS|AARSD1|GMPS|MTHFD1
TISSUES	Limbic system	0.0101	3031	0.0004	0.199568	BTO:0000928	811	40	RPL19|SLC1A4|SCYL1|ANK3|NRG1|RPN1|INPPL1|ABR|CTNNA1|SEC23A|DNAJA2|NQO1|MPDZ|EPB41L1|TP53BP2|PLS3|GMFB|MYLK|CALD1|AFDN|MPP1|CNN3|CMPK1|PIP4K2A|ACOT7|EIF1AX|GARS1|TAGLN3|SEC31A|GPHN|RAN|PRAF2|PPP1R9B|ARL8B|SEPTIN2|UBAP1|CTNNB1|RDX|CAPN5|MTHFD1
GO Biological Process	Limbic system development	0.0394	3031	0.0017	0.14045	GO:0021761	113	10	NRP1|BAX|CRK|ATP2B4|KIF14|PLXNA1|RAB3GAP1|CDK5|PPP1R9B|CTNNB1
GO Molecular Function	Lipid binding	0.00055	3031	7.93e-06	0.325964	GO:0008289	796	45	SNX8|RAB35|SNX17|HIP1R|SNX1|PACSIN2|SLC9A1|RAPGEF2|PIK3C2A|IQGAP1|MYO1E|BAX|ANXA5|RAPGEF6|CYTH3|AXL|CPNE1|AP2A2|HGS|EXOC7|PLCB1|MTSS2|SNX18|FERMT2|ANXA2|ANXA7|PARD3|SNX2|SNX9|PICALM|ARAP1|ANXA4|FCHO2|ANXA11|SHC1|EPN1|FNBP1|NSFL1C|MYO10|CLINT1|C2CD5|ATP1A1|BCAS3|SH3GLB1|ARHGAP35
Monarch Phenotype	Lipid measurement	0.00072	3031	4.12e-06	0.314267	EFO:0004529	2400	103	BAIAP2L1|CSK|CDC37|SNX8|SNX17|PLCG1|PMPCB|NECTIN2|HIP1R|EXOC4|RRAS2|RAB2A|EHBP1|ARCN1|FARP2|RAPGEF2|CDH6|IDE|IQGAP1|CDH2|MYO1E|IGF2BP1|ABI2|AXL|DIP2B|ABR|SEC23A|PFAS|DNMBP|MET|FMN2|BASP1|NUDC|NQO1|MPDZ|NPEPPS|HNRNPM|RAB11B|PLCB1|EZR|RAP1GDS1|PTK2|CTSB|ATG7|ITSN2|MINK1|EPHB4|TPM1|CASP8|PHLDB1|COMT|TSC22D2|CDC42BPA|PTPN14|UTRN|EPB41L2|GNAI3|STXBP3|CNN3|NIBAN2|BICC1|PALM2AKAP2|FGD1|NAA40|AHNAK|EIF1A…
Monarch Phenotype	Lipid or lipoprotein measurement	0.0012	3031	7.55e-06	0.292082	EFO:0005105	2526	106	BAIAP2L1|CSK|CDC37|SNX8|SNX17|PLCG1|PMPCB|NECTIN2|HIP1R|EXOC4|RRAS2|RAB2A|EHBP1|ARCN1|FARP2|RAPGEF2|RAB10|CDH6|IDE|IQGAP1|CDH2|MYO1E|IGF2BP1|ABI2|AXL|DIP2B|ABR|SEC23A|PFAS|DNMBP|MET|TCP1|FMN2|BASP1|NUDC|NQO1|MPDZ|NPEPPS|HNRNPM|RAB11B|PLCB1|EZR|RAP1GDS1|PTK2|CTSB|ATG7|ITSN2|MINK1|EPHB4|TPM1|CASP8|PHLDB1|COMT|TSC22D2|CDC42BPA|PTPN14|UTRN|EPB41L2|GNAI3|STXBP3|CNN3|NIBAN2|BICC1|PALM2AKAP2|FGD1|NAA40|…
UniProt Keywords	Lipid-binding	0.0019	3031	0.00013	0.272125	KW-0446	251	19	SNX8|SNX17|SNX1|PACSIN2|MYO1E|CYTH3|AP2A2|SNX18|FERMT2|PARD3|SNX2|SNX9|EPN1|FNBP1|NSFL1C|CLINT1|C2CD5|SH3GLB1|ARHGAP35
UniProt Keywords	Lipoprotein	1.69e-06	3031	5.04e-08	0.577211	KW-0449	818	52	ARF5|RALA|RP2|YKT6|SEC61B|RAB35|CANX|SNAP23|EFR3A|RRAS2|ARF3|PSMC1|RAB2A|EHBP1|RAB10|RAB7A|RALB|EGFR|GNAQ|ZDHHC5|ARF6|RAB1B|GNAI2|DNAJA2|PAK2|ITGA3|RAP2B|BASP1|RAB12|RAB11B|FMNL3|PARK7|FYN|CYB5R3|NIBAN1|RAB13|MPP1|NRAS|RAP1A|GNAI3|NCS1|NIBAN2|NAA40|RAB2B|KIAA1522|AKAP12|RAB1A|RHOA|DDX46|PRKAB1|YES1|CDC42
Monarch Phenotype	Lipoprotein measurement	0.008	3031	0.00011	0.209691	EFO:0004732	1426	64	BAIAP2L1|CSK|CDC37|SNX8|SNX17|PLCG1|NECTIN2|HIP1R|RAB2A|EHBP1|ARCN1|FARP2|RAB10|IGF2BP1|ABI2|AXL|DIP2B|ABR|PFAS|TCP1|FMN2|NUDC|NPEPPS|HNRNPM|RAB11B|PTK2|ATG7|ITSN2|EPHB4|TPM1|PHLDB1|COMT|TSC22D2|CDC42BPA|EPB41L2|GNAI3|STXBP3|BICC1|PALM2AKAP2|NAA40|AHNAK|EIF1AX|TRIM5|ITPA|DNM2|SNX9|TAGLN|ATP2B1|REPS1|FCHO2|CORO1C|NFIC|AFAP1|RAB3GAP1|FNBP1|GPHN|ARL15|PARP10|PLCB3|SIPA1L1|COBLL1|PHGDH|RDX|AMPD2
Monarch Phenotype	Lissencephaly	0.0135	3031	0.00021	0.186967	HP:0001339	157	14	SNAP29|PI4KA|MPDZ|TUBB3|ANKLE2|KIF14|NSDHL|STXBP1|FAT4|RAB3GAP1|DAG1|ACTG1|PHGDH|CASK
Reactome Pathways	Listeria monocytogenes entry into host cells	0.0045	3031	0.00045	0.234679	HSA-8876384	20	5	CBL|MET|HGS|CTNND1|CTNNB1
TISSUES	Liver	2.03e-48	3031	5.03e-51	4.76925	BTO:0000759	2125	193	PSMC4|PYGB|TPD52L2|AHCY|PSMD10|CDC37|NAMPT|PSMA2|SEC61B|RPL19|GALK1|SLC25A11|LRRC59|CD82|ARPC3|SNX17|VASP|TRAP1|CANX|NECTIN2|PI4KA|CCT7|ITGAV|PSMC1|PSMD11|AARS1|HACD3|AJUBA|MAP2K2|ACTR3|NAPA|ARCN1|RAB7A|NRP1|ACAT1|PIK3C2A|PXN|IQGAP1|CDH2|PFKL|PGD|EGFR|CCT6A|NONO|CCT5|ANK3|QDPR|GNAQ|UBE2L6|CSTB|ITGA5|RPN1|ANXA5|ITGA2|ARF6|HPRT1|CRK|MAP2K1|CTNNA1|YWHAG|SEC23A|ACAD9|GNAI2|DNAJA2|MET|TCP1|UGDH|NUDC|N…
Monarch Phenotype	Liver enzyme measurement	0.00089	3031	5.53e-06	0.305061	EFO:0004582	1124	58	BAIAP2L1|DVL2|TAB1|PYGB|YKT6|SNX17|NECTIN2|NUMBL|NOTCH2|RAB2A|FARP2|ABI2|RAPGEF6|AXL|DIP2B|DNMBP|MET|FMN2|NUDC|PKM|DCBLD2|RASA3|CTSB|ATG7|AP1B1|EPHA2|CASP8|MCMBP|PHLDB1|CALD1|CDC42BPA|CHUK|PKN2|DNAJB4|NOC3L|DLG5|BICC1|PARD3|SRM|AHNAK|TRIM5|ARAP1|STON1|MAGI1|FCHO2|TBC1D5|AFAP1|FNBP1|ARL15|DENND2B|ACTG1|YES1|SEPTIN2|COBLL1|PHGDH|CDC42|JAK1|ARHGAP35
GO Biological Process	Localization	1.41e-16	3031	1.79e-19	1.58508	GO:0051179	4512	219	ARF5|RALA|DVL2|SNAP29|PSMD10|RP2|EHD4|TBC1D17|CDC37|SNX8|YKT6|SEC61B|SLC25A11|RAB35|EXOC2|SNX17|SLC1A4|DDX39A|CANX|PMPCB|SNAP23|TSG101|NECTIN2|HIP1R|EXOC4|EFR3A|CCNB1|ARF3|CCT7|ITGAV|IPO5|MPP5|SNX1|SLC12A2|RAB2A|AJUBA|ACTR3|PACSIN2|EHD2|NAPA|SLC9A1|EHBP1|ARCN1|CBL|CUL3|RAPGEF2|RAB10|PDCD6|RAB7A|NRP1|TNPO3|SRI|PIK3C2A|VPS37B|CDH2|SCYL1|ARL8A|EGFR|VPS51|CCT5|ANK3|FLCN|ZDHHC5|MYO1E|IGF2BP1|ATP5MF|BA…
Reactome Pathways	Localization of the PINCH-ILK-PARVIN complex to focal adhesions	0.0058	3031	0.00061	0.223657	HSA-446343	4	3	PXN|ITGB1|ILK
GO Biological Process	Localization within membrane	8.22e-11	3031	4.04e-13	1.00851	GO:0051668	535	50	RALA|EHD4|SEC61B|RAB35|EXOC2|SNX17|EXOC4|EFR3A|MPP5|EHD2|RAPGEF2|RAB10|RAB7A|VPS37B|CDH2|EGFR|VPS51|ANK3|BAX|RAPGEF6|ARF6|CRK|SEC23A|SRP68|VPS37A|LLGL1|HGS|RAB12|RAB11B|EZR|FERMT2|DLG1|SCRIB|EPHA2|AFDN|RAB13|RAP1A|TPBG|STXBP1|PARD3|OPTN|DNM2|FCHO2|RAB3GAP1|GPHN|CDK5|C2CD5|EHD1|SH3GLB1|RDX
GO Biological Process	Locomotion	0.0001	3031	2.02e-06	0.4	GO:0040011	537	36	RALA|EFNB1|VASP|LGALS3|NOTCH2|ITGAV|PDGFRB|SLC12A2|NRP1|NRG1|CRK|MAP2K1|MET|TUBB3|NEXN|PTK2|FYN|SCRIB|EPHB4|EPHA2|MYPN|PLXNB2|RAB13|TPBG|AMOT|NIBAN2|PLXNA1|PPP3CB|ABCC1|EPHB2|RHOA|CDK5|DAG1|PIP5K1C|CYFIP1|ARHGAP35
Monarch Phenotype	Long philtrum	2.53e-05	3031	4.35e-08	0.459688	HP:0000343	331	30	NOTCH2|MPP5|SLC12A2|MAP2K2|CBL|CDH11|CDH2|INPPL1|MAP2K1|SEC23A|FTSJ1|EXOC7|ACSL4|PSMD12|LONP1|MAP3K7|NRAS|FGD1|PPP1R12A|GDI1|RPL10|SLC2A1|PPP2R5D|TENM3|ACTG1|ADSL|CASK|CTNNB1|CDC42|TTC37
KEGG Pathways	Long-term depression	0.00058	3031	7.79e-05	0.323657	hsa04730	59	9	MAP2K2|GNAQ|MAP2K1|GNAI2|PPP2R1A|PLCB1|NRAS|GNAI3|PLCB3
KEGG Pathways	Long-term potentiation	0.0034	3031	0.00059	0.246852	hsa04720	63	8	MAP2K2|GNAQ|MAP2K1|PLCB1|NRAS|RAP1A|PPP3CB|PLCB3
Monarch Phenotype	Low density lipoprotein cholesterol measurement	0.0225	3031	0.00041	0.164782	EFO:0004611	624	33	BAIAP2L1|CDC37|SNX8|SNX17|PLCG1|NECTIN2|RAB2A|EHBP1|FARP2|DIP2B|PFAS|NPEPPS|PTK2|ITSN2|EPHB4|COMT|CDC42BPA|EPB41L2|GNAI3|STXBP3|BICC1|NAA40|EIF1AX|TRIM5|DNM2|TAGLN|CORO1C|RAB3GAP1|ARL15|PARP10|COBLL1|RDX|AMPD2
Monarch Phenotype	Low posterior hairline	0.0039	3031	4.12e-05	0.240894	HP:0002162	83	11	EFNB1|RRAS2|MAP2K2|CBL|PIK3C2A|CDH2|VPS51|MAP2K1|NRAS|RAB3GAP1|ACTG1
Monarch Phenotype	Low-set ears	0.0373	3031	0.00078	0.142829	HP:0000369	649	33	SLC1A4|RRAS2|NOTCH2|SLC12A2|MAP2K2|CBL|CDH11|CDH2|MAP2K1|RPS15A|TUBB3|EXOC7|PSMD12|KIF14|MAP3K7|NRAS|GNAI3|FGD1|FAT4|PPP1R12A|RAB3GAP1|RPL10|PPP2R5D|FLNB|TENM3|DAG1|ADSL|RPS7|RPL11|TPM2|EIF4A3|CDC42|TTC37
TISSUES	Lung	5.81e-17	3031	7.43e-19	1.62358	BTO:0000763	1395	102	ARF5|RALA|BAIAP2L1|PSMC4|PYGB|PSMD10|CSK|NAMPT|SERPINE1|PSMA2|ACTA2|RPL19|DDX39A|VASP|HIP1R|LGALS3|ARF3|CCT7|TBRG4|PSMC1|IPO5|PSMD11|COTL1|EHD2|NAPA|TUBB4A|RAB7A|PIK3C2A|PFKL|PGD|RALB|NONO|VPS51|CCT5|USP15|FLCN|ANXA5|CRK|CTNNA1|MMP14|ACAD9|RPS15A|BASP1|NUDC|NQO1|PKM|FARSA|NPEPPS|TUFM|EIF4A2|BGN|EZR|PARK7|TUBB4B|RPS2|FERMT2|DPYSL3|CTSB|ANXA2|RPS3A|PCBP2|MYLK|CALD1|PTPN14|TIPRL|MAP3K7|YARS1|EIF2S2|…
TISSUES	Lung cancer cell	0.0035	3031	0.00013	0.245593	BTO:0000551	131	13	RPL19|EGFR|CCT6A|CCT5|PKM|FERMT2|SCRIB|MPP1|NRAS|SLK|ITPA|C2CD5|TTC37
GO Biological Process	Lung morphogenesis	0.0488	3031	0.0023	0.131158	GO:0060425	45	6	MAP2K2|MAP2K1|DLG5|DAG1|YAP1|CTNNB1
TISSUES	Lymph	0.00017	3031	5.2e-06	0.376955	BTO:0000855	177	18	SLC1A4|CANX|PKM|RPS2|RPS3A|TAGLN2|TKT|ANXA11|RPL10|CFL1|TUBA1C|RAN|ACTG1|COPE|WASF2|PHGDH|ENO1|EIF4A3
Monarch Phenotype	Lymphedema	0.00055	3031	2.65e-06	0.325964	HP:0001004	60	11	RRAS2|MAP2K2|CBL|RASA1|INPPL1|MAP2K1|EPHB4|PTPN14|NRAS|FAT4|CDC42
TISSUES	Lymphoblast	1.86e-09	3031	4.44e-11	0.873049	BTO:0000772	240	30	RPL19|CCT7|CCT5|TCP1|RPS15A|PKM|TUFM|HNRNPM|ANXA2|RPS3A|PSMD12|PCBP2|MAPRE1|SLC25A6|GART|GARS1|ASNS|CCT4|RPL6|RPL10|FLNB|CFL1|RAN|ACTG1|HSPH1|PHGDH|RPL9|RPS7|RPL11|MTHFD1
TISSUES	Lymphocyte	8.39e-11	3031	1.49e-12	1.00762	BTO:0000775	698	57	TPD52L2|RPL19|CD82|PLCG1|NOTCH2|CCT7|IPO5|ACTR3|SLC9A1|TUBB4A|PRKAR2A|CCT5|MAP2K1|YWHAG|TCP1|RPS15A|PKM|TUFM|HNRNPM|PTK2|TUBB4B|RPS2|ANXA2|RPS3A|FYN|PSMD12|CASP8|PCBP2|EPB41L2|CHUK|MAPRE1|ABI1|AHNAK|SBF1|SLC25A6|GART|GARS1|ASNS|CCT4|NFATC4|PPP1R12A|RPL6|RPL10|FNBP1|FLNB|CFL1|RAN|ACTG1|RSL1D1|HSPH1|PHGDH|RPL9|RPS7|ENO1|RPL11|EIF4A3|MTHFD1
Monarch Phenotype	Lymphocyte count	0.0037	3031	3.66e-05	0.24318	EFO:0004587	694	39	BAIAP2L1|CSK|EHD4|ACTA2|CD82|ADGRE5|CANX|NECTIN2|NOTCH2|MAP2K2|CBL|IQGAP1|EGFR|ATP5MF|BAX|CRK|BCR|GNAI2|PAK2|CPNE1|RASA3|PLCB1|MINK1|ATP2B4|ANKLE2|CASP8|PLXNB2|RAP1A|PALM2AKAP2|PIP4K2A|ABCC1|SLC4A7|SLC2A1|FLNB|PRKAB1|COBLL1|DOCK10|MTHFD1|JAK1
TISSUES	Lymphocytic leukemia cell	8.61e-08	3031	2.16e-09	0.7065	BTO:0000744	419	37	DVL2|CD82|PLCG1|CANX|NOTCH2|ITGAV|MAP2K2|PPP1R12C|SLC9A1|CBL|PXN|ITGA5|ANXA5|ITGA2|BCR|PKM|ARHGEF1|ATG7|MSN|AFDN|MAP3K7|SBF1|DNM2|XRCC5|ITGB1|ABCC1|NFIC|SHC1|SLC2A1|FLNB|CFL1|TXNRD1|SLC1A5|YAP1|DOCK10|CTNNB1|ENO1
TISSUES	Lymphoid tissue	4.56e-12	3031	7.33e-14	1.1341	BTO:0000753	1600	99	TPD52L2|RPL19|CD82|EXOC2|ADGRE5|PLCG1|VASP|NOTCH2|CCT7|IPO5|ACTR3|PPP1R12C|SLC9A1|TUBB4A|PRKAR2A|RALB|NONO|CCT5|FLCN|UBE2L6|ATP5MF|ITGB5|STAT6|MAP2K1|YWHAG|ARHGAP1|ACAD9|TCP1|RPS15A|PKM|TUFM|PPP2R1A|HNRNPM|EIF4A2|BGN|PTK2|TUBB4B|SEPTIN6|RPS2|ANXA2|RPS3A|FYN|PSMD12|CASP8|PCBP2|PTPRF|NIBAN1|EPB41L2|GLRX3|MPP1|CHUK|PKN2|MAPRE1|ABI1|AHNAK|GDI2|SBF1|SLC25A6|GART|PSME1|GARS1|ASNS|FAT4|CCT4|SEC31A|NFATC…
TISSUES	Lymphoma cell	7.19e-07	3031	1.93e-08	0.614327	BTO:0000785	210	24	SLC25A11|CANX|PSMD11|AKR1B1|DNAAF5|RAB1B|PKM|FARSA|XPOT|RAB11B|IPO9|GLRX3|YARS1|MAPRE1|SLC25A6|CCT4|POLR2H|CFL1|ACTG1|ARL8B|CYFIP1|WASF2|PHGDH|ENO1
COMPARTMENTS	Lysosome	0.0135	3031	0.00072	0.186967	GOCC:0005764	566	30	SNAP29|PYGB|SNAP23|PDGFRB|SNX1|RAB2A|RAB7A|ARL8A|FLCN|GNAQ|CSPG4|CPNE1|BGN|AP2A2|HGS|RAB12|TUBB4B|CTSB|ANXA2|ATG7|AP2A1|CYB5R3|SNX2|GDI2|SDC1|ANXA11|DDOST|FNBP1|ATP6V1C1|ARL8B
GO Cellular Component	Lysosome	0.0128	3031	0.0011	0.189279	GO:0005764	746	36	SNAP29|PYGB|SNAP23|PDGFRB|SNX1|RAB2A|RAB7A|ARL8A|ANK3|FLCN|GNAQ|CSPG4|CPNE1|NAPG|BGN|AP2A2|HGS|RAB12|ATP11C|TUBB4B|CTSB|ANXA2|AP1B1|AP2A1|CYB5R3|GNAI3|PIP4K2A|AHNAK|SNX2|GDI2|SDC1|ANXA11|DDOST|FNBP1|ATP6V1C1|ARL8B
Reactome Pathways	M Phase	0.00058	3031	4.22e-05	0.323657	HSA-68886	382	26	PSMC4|PSMD10|PSMA2|CCNB1|PSMC1|PSMD11|TAOK1|RAB2A|TUBB4A|YWHAG|RAB1B|TUBB6|NUDC|TUBB3|PPP2R1A|TUBB4B|PSMD12|ANKLE2|NEK6|MAPRE1|PSME1|RAB1A|PPP2R5D|TUBA1C|RAN|RPS27
GO Biological Process	Macroautophagy	0.0041	3031	0.00012	0.238722	GO:0016236	188	16	SNAP29|RIPK2|TSG101|RAB7A|VPS37B|RAB1B|VPS37A|HGS|ATG7|VTA1|PIP4K2A|ATG4B|RAB1A|TBC1D5|NSFL1C|ARL8B
Monarch Phenotype	Macrocephaly	0.003	3031	2.82e-05	0.252288	HP:0000256	418	28	NOTCH2|MPP5|SLC12A2|MAP2K2|CDH2|NONO|ANK3|GNAQ|INPPL1|MAP2K1|SEC23A|MPDZ|TUBB3|FTSJ1|BGN|ACSL4|PSMD12|NRAS|GNAI3|DNM2|PPP1R12A|GDI1|EIF2B1|SLC2A1|PPP2R5D|SERPINH1|DAG1|CTNNB1
GO Biological Process	Macromolecule localization	2.51e-20	3031	1.92e-23	1.96003	GO:0033036	2356	152	ARF5|RALA|DVL2|SNAP29|PSMD10|RP2|EHD4|TBC1D17|CDC37|SNX8|YKT6|SEC61B|RAB35|EXOC2|SNX17|DDX39A|CANX|PMPCB|SNAP23|TSG101|EXOC4|EFR3A|ARF3|IPO5|MPP5|SNX1|RAB2A|AJUBA|PACSIN2|EHD2|NAPA|EHBP1|ARCN1|RAPGEF2|RAB10|PDCD6|RAB7A|NRP1|TNPO3|SRI|VPS37B|CDH2|SCYL1|ARL8A|EGFR|VPS51|ANK3|ZDHHC5|IGF2BP1|BAX|ITGA2|RAPGEF6|ARF6|CRK|BCR|CTNNA1|DDX19A|YWHAG|SEC23A|RAB1B|ARHGAP1|SRP68|PAK2|TCP1|VPS37A|FMN2|NAPG|COPG1…
Monarch Phenotype	Macrotia	0.016	3031	0.00026	0.179588	HP:0000400	223	17	SNAP29|MPP5|SLC12A2|MAP2K2|CBL|MAP2K1|ITGA3|FTSJ1|PSMD12|NHS|ASNS|RAB3GAP1|RPL10|SLC2A1|TENM3|PHGDH|CASK
UniProt Keywords	Magnesium	0.0018	3031	0.00011	0.274473	KW-0460	578	33	CSK|MAP2K2|PDCD6|PFKL|GNAQ|ITGA2|HPRT1|GNAI2|PFAS|PKM|ENO3|ATP11C|SRR|ACSL4|ATP2B4|MYLK|COMT|CDC42BPA|MAP3K7|GNAI3|STK4|ADPRHL2|NEK6|ITPA|ITGB1|TKT|ATP2B1|RHOA|GPHN|ATP1A1|RAN|ENO1|JAK1
GO Molecular Function	Magnesium ion binding	0.0138	3031	0.00026	0.186012	GO:0000287	223	17	RP2|PDCD6|HPRT1|PKM|FARSA|ENO3|ATP11C|SRR|COMT|CDC42BPA|MAP3K7|STK4|ADPRHL2|NEK6|TKT|RAN|ENO1
Reactome Pathways	Major pathway of rRNA processing in the nucleolus and cytosol	0.007	3031	0.00078	0.21549	HSA-6791226	181	14	RPL19|RPS15A|RPS2|RPLP1|RPS3A|RPL34|RPL6|RPL10|RPS13|RPS4Y2|RPL9|RPS7|RPL11|RPS27
TISSUES	Male reproductive gland	2.86e-18	3031	3.42e-20	1.75436	BTO:0000080	2658	156	RANBP9|AHCY|ACTA2|RPL19|SNX17|DDX39A|PLCG1|TRAP1|CANX|SNAP23|CNN1|EXOC4|ARF3|CCT7|ITGAV|PSMC1|IPO5|ANKRD13A|HACD3|SNX1|COTL1|MAP2K2|PACSIN2|NAPA|PPP1R12C|FARP2|TUBB4A|CUL3|RAB10|RAB7A|PRKAR2A|IDE|PXN|CDH2|SCYL1|RASA1|CCT6A|NONO|VPS51|CCT5|GNAQ|RPN1|ANXA5|ERAP1|CTNNA1|SEC23A|GNAI2|ITGA3|TCP1|VPS37A|RPS15A|PKM|FARSA|PPP2R1A|RIC8A|EIF4A2|AP2A2|RASA3|ACSL4|SEPTIN6|RPS2|MAP4K4|CTSB|ANXA2|RPLP1|RPS3A|A…
TISSUES	Male reproductive system	2.29e-18	3031	2.65e-20	1.76402	BTO:0000082	2838	163	RANBP9|AHCY|ACTA2|RPL19|SNX17|DDX39A|ADGRE5|PLCG1|TRAP1|CANX|SNAP23|CNN1|EXOC4|ARF3|CCT7|ITGAV|PSMC1|IPO5|ANKRD13A|HACD3|SNX1|COTL1|RAB2A|MAP2K2|PACSIN2|NAPA|PPP1R12C|FARP2|TUBB4A|CUL3|RAB10|RAB7A|PRKAR2A|IDE|PXN|CDH2|SCYL1|RASA1|CCT6A|NONO|VPS51|CCT5|GNAQ|RPN1|ANXA5|ERAP1|CTNNA1|SEC23A|GNAI2|ITGA3|TCP1|VPS37A|RPS15A|PKM|FARSA|PPP2R1A|RIC8A|EIF4A2|AP2A2|RASA3|ACSL4|SEPTIN6|RPS2|MAP4K4|CTSB|ANXA2|…
WikiPathways	Malignant pleural mesothelioma	9.5e-05	3031	3.16e-06	0.402228	WP5087	434	31	DVL2|ACTA2|ITGAV|PDGFRB|AJUBA|MAP2K2|CDH6|CDH11|CDH2|EGFR|BAX|ITGA2|MAP2K1|CTNNA1|MMP14|PAK2|ITGA3|MET|PTK2|MAP4K4|MINK1|EPHA2|AMOT|ITGB1|SHC1|SLC2A1|PRKAB1|ACTG1|YAP1|CTNNB1|JAK1
Reactome Pathways	MAP kinase activation	0.0162	3031	0.0022	0.179048	HSA-450294	61	7	TAB1|RIPK2|MAP2K1|PPP2R1A|MAP3K7|CHUK|PPP2R5D
GO Molecular Function	MAP-kinase scaffold activity	0.0262	3031	0.00054	0.15817	GO:0005078	11	4	MAP2K2|IQGAP1|SH3RF1|MAP2K1
Reactome Pathways	MAP2K and MAPK activation	0.0026	3031	0.00023	0.258503	HSA-5674135	40	7	CSK|MAP2K2|IQGAP1|MAP2K1|NRAS|RAP1A|ACTG1
GO Biological Process	MAPK cascade	0.0067	3031	0.00021	0.217393	GO:0000165	219	17	RIPK2|ITGAV|TAOK1|HACD3|MAP2K2|RAPGEF2|EGFR|FLCN|NRG1|MAP2K1|MAP4K4|MINK1|IQGAP3|MAP3K7|NRAS|PBK|CTNNB1
WikiPathways	MAPK cascade	0.0262	3031	0.0029	0.15817	WP422	32	5	MAP2K2|MAP2K1|RASA3|NRAS|PLCB3
Reactome Pathways	MAPK family signaling cascades	8.79e-10	3031	9.24e-12	0.905601	HSA-5683057	322	36	RANBP9|PSMC4|PSMD10|CSK|PSMA2|PSMC1|PSMD11|PDGFRB|MAP2K2|CUL3|RAPGEF2|IQGAP1|RASA1|EGFR|NRG1|IGF2BP1|MAP2K1|PAK2|MET|PPP2R1A|RASA3|PTK2|DLG1|FYN|PSMD12|NRAS|RAP1A|IL6ST|PSME1|SHC1|SEPTIN7|PPP2R5D|ACTG1|CDC42EP3|CDC42|JAK1
KEGG Pathways	MAPK signaling pathway	0.00028	3031	3.02e-05	0.355284	hsa04010	286	22	TAB1|RRAS2|TAOK1|PDGFRB|MAP2K2|RAPGEF2|RASA1|EGFR|CRK|MAP2K1|PAK2|MET|EPHA2|MAP3K7|NRAS|RAP1A|CHUK|STK4|HSPA1L|PPP3CB|FLNB|CDC42
WikiPathways	MAPK signaling pathway	0.00024	3031	1.03e-05	0.361979	WP382	245	21	TAB1|RRAS2|TAOK1|PDGFRB|MAP2K2|RAPGEF2|RASA1|EGFR|CRK|MAP2K1|PAK2|MAP4K4|MAP3K7|NRAS|RAP1A|CHUK|STK4|HSPA1L|PPP3CB|FLNB|CDC42
Reactome Pathways	MAPK1 (ERK2) activation	0.0239	3031	0.0035	0.16216	HSA-112411	9	3	MAP2K2|IL6ST|JAK1
Reactome Pathways	MAPK1/MAPK3 signaling	2.89e-08	3031	4.18e-10	0.75391	HSA-5684996	283	31	RANBP9|PSMC4|PSMD10|CSK|PSMA2|PSMC1|PSMD11|PDGFRB|MAP2K2|CUL3|RAPGEF2|IQGAP1|RASA1|EGFR|NRG1|MAP2K1|MET|PPP2R1A|RASA3|PTK2|DLG1|FYN|PSMD12|NRAS|RAP1A|IL6ST|PSME1|SHC1|PPP2R5D|ACTG1|JAK1
Reactome Pathways	MAPK3 (ERK1) activation	0.0288	3031	0.0044	0.154061	HSA-110056	10	3	MAP2K1|IL6ST|JAK1
Reactome Pathways	MAPK6/MAPK4 signaling	0.00024	3031	1.43e-05	0.361979	HSA-5687128	88	12	PSMC4|PSMD10|PSMA2|PSMC1|PSMD11|IGF2BP1|PAK2|PSMD12|PSME1|SEPTIN7|CDC42EP3|CDC42
WikiPathways	mBDNF and proBDNF regulation of GABA neurotransmission	0.0432	3031	0.0055	0.136452	WP4829	38	5	PLCG1|AP2A2|AP2A1|RHOA|SHC1
Monarch Phenotype	Mean platelet volume	7.57e-05	3031	2.48e-07	0.41209	EFO:0004584	555	39	SNX8|ADGRE5|NECTIN2|PI4KA|TAOK1|PACSIN2|RALB|DOCK11|ITGA2|ERAP1|MAP2K1|PCDHGC3|NQO1|NPEPPS|PDIA5|PLCB1|ACSL4|SEPTIN6|PLS3|TPM1|TSC22D2|NIBAN1|TAGLN2|ARHGAP18|STK4|MAPRE1|SNX2|TRIM5|PICALM|ARAP1|FCHO2|TBC1D5|AFAP1|DENND2B|TUBA1C|CNN2|PDCD5|PCDHGB5|DOCK10
WikiPathways	Mechanoregulation and pathology of YAP/TAZ via Hippo and non-Hippo mechanisms	0.0013	3031	7.51e-05	0.288606	WP4534	45	8	ACTA2|ITGB5|CTNNA1|PAK2|MAP4K4|ITGB1|ACTG1|CTNNB1
STRING Clusters	Megacystis-microcolon-intestinal hypoperistalsis syndrome, and Calponin repeat	0.0386	3031	0.00096	0.141341	CL:22672	5	3	ACTA2|CNN1|TAGLN
KEGG Pathways	Melanogenesis	0.003	3031	0.0005	0.252288	hsa04916	95	10	DVL2|MAP2K2|GNAQ|MAP2K1|GNAI2|PLCB1|NRAS|GNAI3|PLCB3|CTNNB1
KEGG Pathways	Melanoma	0.0183	3031	0.0051	0.173755	hsa05218	72	7	PDGFRB|MAP2K2|EGFR|BAX|MAP2K1|MET|NRAS
TISSUES	Melanoma cell line	9.37e-07	3031	2.55e-08	0.602826	BTO:0000849	180	22	AHCY|RAB35|SLC1A4|CANX|RAB2A|SLC9A1|RAB7A|ITGA5|ANXA5|MMP14|CSPG4|EZR|CTSB|ANXA2|NRAS|SDC1|ITGB1|SLC2A1|ATP6V1C1|SLC1A5|ATP1A1|RAN
GO Cellular Component	Melanosome	2.67e-07	3031	7.82e-09	0.657349	GO:0042470	109	18	AHCY|RAB35|SLC1A4|CANX|RAB2A|RAB7A|RPN1|MMP14|CTSB|ANXA2|CCT4|ITGB1|RAB1A|ANXA11|SLC2A1|SLC1A5|ATP1A1|RAN
COMPARTMENTS	Membrane	3.72e-15	3031	4.69e-17	1.44295	GOCC:0016020	5715	250	RALA|BAIAP2L1|EFNB1|SNAP29|PYGB|RP2|EHD4|MPP6|SNX8|YKT6|SEC61B|SLC25A11|LRRC59|CD82|RAB35|SNX17|SLC1A4|ADGRE5|PLCG1|VASP|TRAP1|CANX|PMPCB|SNAP23|TSG101|NECTIN2|HIP1R|EXOC4|WDR44|LGALS3|EFR3A|PI4KA|NOTCH2|ARF3|ITGAV|TAOK1|ANKRD13A|PDGFRB|SNX1|SLC12A2|RAB2A|AJUBA|MAP2K2|PACSIN2|EHD2|NAPA|SLC9A1|ARCN1|CBL|CUL3|RAPGEF2|RAB10|PDCD6|RAB7A|CDH6|NRP1|TNPO3|PRKAR2A|SRI|PIK3C2A|IDE|VPS37B|PXN|IQGAP1|CDH11|…
GO Cellular Component	Membrane	2.19e-22	3031	2.88e-24	2.16596	GO:0016020	9523	379	ARF5|RALA|BAIAP2L1|DVL2|RANBP9|PSMC4|EFNB1|SNAP29|TAB1|PYGB|RP2|CSK|EHD4|MPP6|SNX8|AIMP2|SERPINE1|YKT6|SEC61B|RPL19|GALK1|SLC25A11|LRRC59|CD82|ARPC3|RAB35|EXOC2|SNX17|SLC1A4|DDX39A|ADGRE5|PLCG1|VASP|TRAP1|CANX|CDC42EP1|PMPCB|SNAP23|TSG101|NECTIN2|HIP1R|EXOC4|WDR44|LGALS3|EFR3A|PI4KA|RRAS2|CCNB1|NOTCH2|ARF3|PRPH|BCAR3|ITGAV|PSMC1|IPO5|MPP5|PSMD11|ANKRD13A|AARS1|PDGFRB|HACD3|SNX1|COTL1|SMURF2|SLC12…
UniProt Keywords	Membrane	6.93e-06	3031	2.53e-07	0.515927	KW-0472	7068	252	ARF5|RALA|DVL2|RANBP9|EFNB1|SNAP29|RP2|CSK|EHD4|MPP6|SNX8|YKT6|SEC61B|SLC25A11|LRRC59|CD82|RAB35|SNX17|SLC1A4|ADGRE5|VASP|TRAP1|CANX|CDC42EP1|SNAP23|TSG101|NECTIN2|HIP1R|WDR44|EFR3A|PI4KA|RRAS2|NOTCH2|ITGAV|PSMC1|MPP5|ANKRD13A|PDGFRB|HACD3|SNX1|SMURF2|SLC12A2|RAB2A|AJUBA|MAP2K2|PACSIN2|EHD2|NAPA|SLC9A1|EHBP1|ARCN1|CBL|RAPGEF2|RAB10|PDCD6|RAB7A|CDH6|NRP1|PRKAR2A|SRI|PIK3C2A|IDE|VPS37B|IQGAP1|CDH11…
GO Biological Process	Membrane assembly	0.0116	3031	0.0004	0.193554	GO:0071709	59	8	PACSIN2|CDH2|ANK3|ANXA2|ANKLE2|PICALM|EPHB2|NSFL1C
Reactome Pathways	Membrane binding and targetting of GAG proteins	0.0095	3031	0.0011	0.202228	HSA-174490	14	4	TSG101|VPS37B|VPS37A|UBAP1
COMPARTMENTS	Membrane coat	2.34e-06	3031	5.58e-08	0.563078	GOCC:0030117	84	15	ARCN1|PDCD6|SCYL1|SEC23A|COPG1|AP2A2|AP1B1|AP2A1|DNM2|PICALM|SEC31A|NECAP2|EPN1|CLINT1|COPE
GO Cellular Component	Membrane coat	1.62e-05	3031	7.76e-07	0.479048	GO:0030117	91	14	ARCN1|PDCD6|SCYL1|SEC23A|COPG1|AP2A2|AP1B1|AP2A1|PICALM|SEC31A|NECAP2|EPN1|CLINT1|COPE
GO Biological Process	Membrane docking	0.00024	3031	4.97e-06	0.361979	GO:0022406	93	13	SNAP29|YKT6|EXOC2|EXOC4|RAB10|RAB7A|RAB12|EXOC7|EZR|MSN|RAB13|STXBP3|STXBP1
GO Biological Process	Membrane fission	7.53e-05	3031	1.4e-06	0.412321	GO:0090148	44	10	EXOC2|TSG101|EXOC4|VPS37B|VPS37A|HGS|EXOC7|CORO1C|SH3GLB1|UBAP1
GO Biological Process	Membrane fusion	0.0187	3031	0.0007	0.172816	GO:0061025	158	13	SNAP29|YKT6|SNAP23|NECTIN2|NAPA|RAB7A|NAPG|RAB13|GNAI3|STXBP1|PIP4K2A|NSFL1C|ARL8B
GO Biological Process	Membrane organization	3.09e-09	3031	2.26e-11	0.851004	GO:0061024	773	58	BAIAP2L1|SNAP29|YKT6|EXOC2|SNAP23|TSG101|NECTIN2|HIP1R|EXOC4|MPP5|PACSIN2|EHD2|NAPA|SLC9A1|CUL3|PDCD6|RAB7A|PIK3C2A|VPS37B|CDH2|EGFR|ANK3|BAX|SEC23A|VPS37A|NAPG|HGS|ATP11C|EXOC7|MTSS2|SNX18|DLG1|ARHGAP12|ANXA2|ANKLE2|RAB13|GNAI3|STXBP1|NEK6|PIP4K2A|SLC25A6|DNM2|SNX9|PICALM|SEC31A|ABCC1|EPHB2|RAB1A|FCHO2|CORO1C|RHOA|GPHN|NSFL1C|PIP5K1C|ARL8B|SH3GLB1|UBAP1|CDC42
COMPARTMENTS	Membrane protein complex	8.81e-06	3031	2.41e-07	0.505502	GOCC:0098796	1353	71	SNAP29|YKT6|SEC61B|SNAP23|TSG101|ITGAV|SNX1|NAPA|SLC9A1|ARCN1|CBL|PDCD6|CDH6|PIK3C2A|VPS37B|CDH11|CDH2|SCYL1|EGFR|GNAQ|ATP5MF|BAX|ITGA5|ITGB5|RPN1|ITGA2|STAT6|CTNNA1|SEC23A|GNAI2|ITGA3|VPS37A|NAPG|COPG1|AP2A2|DLG1|ATP5F1C|AP1B1|CASP8|AP2A1|AFDN|UTRN|VTA1|GNAI3|CHUK|CLIC4|SNX2|IL6ST|SLC25A6|DNM2|GARS1|PICALM|SEC31A|ITGB1|CTNND1|ABCC1|NECAP2|CORO1C|DDOST|SHC1|TBC1D5|EPN1|CLINT1|ATP6V1C1|DAG1|ATP1A1…
GO Cellular Component	Membrane protein complex	1.39e-06	3031	5.01e-08	0.585699	GO:0098796	1218	68	SNAP29|YKT6|SEC61B|SNAP23|TSG101|ITGAV|SNX1|NAPA|SLC9A1|ARCN1|CBL|PDCD6|CDH6|PIK3C2A|VPS37B|CDH11|CDH2|SCYL1|EGFR|GNAQ|ATP5MF|BAX|ITGA5|ITGB5|RPN1|ITGA2|CTNNA1|SEC23A|GNAI2|ITGA3|VPS37A|NAPG|COPG1|AP2A2|DLG1|ANXA2|ATP5F1C|AP1B1|CASP8|AP2A1|AFDN|UTRN|GNAI3|CHUK|CLIC4|AHNAK|SNX2|IL6ST|SLC25A6|PICALM|SEC31A|ITGB1|CTNND1|NECAP2|CORO1C|DDOST|SHC1|TBC1D5|EPN1|CLINT1|ATP6V1C1|DAG1|ATP1A1|ITGA7|COPE|UBAP…
COMPARTMENTS	Membrane raft	0.0145	3031	0.00078	0.183863	GOCC:0045121	181	14	PACSIN2|EHD2|SLC9A1|CBL|PRKAR2A|EGFR|RAP2B|EZR|FYN|ATP2B4|IL6ST|ITGB1|CORO1C|SERPINH1
GO Cellular Component	Membrane raft	2.2e-07	3031	6.23e-09	0.665758	GO:0045121	320	31	EFNB1|CSK|SMURF2|PACSIN2|EHD2|SLC9A1|CBL|PRKAR2A|CDH2|EGFR|STAT6|CRK|CTNNA1|GNAI2|RAP2B|EZR|PARK7|DLG1|FYN|ATP2B4|CASP8|GNAI3|IL6ST|ITGB1|ATP2B1|CORO1C|SLC2A1|SERPINH1|DAG1|ATP1A1|CTNNB1
Reactome Pathways	Membrane Trafficking	5.53e-26	3031	1.7e-28	2.52573	HSA-199991	626	80	ARF5|RALA|DVL2|SNAP29|TBC1D17|YKT6|ARPC3|RAB35|EXOC2|SNAP23|TSG101|HIP1R|EXOC4|ARF3|ACTR3|PACSIN2|NAPA|ARCN1|CBL|TUBB4A|RAB10|RAB7A|PIK3C2A|VPS37B|EGFR|VPS51|ANK3|CYTH3|ARF6|COPS2|YWHAG|SEC23A|RAB1B|VPS37A|TUBB6|TUBB3|NAPG|COPG1|AP2A2|HGS|RAB12|RAB11B|EXOC7|TUBB4B|SNX18|ITSN2|AP1B1|COPS5|AP2A1|VTA1|RAB13|STXBP3|OPTN|SNX2|GDI2|SBF1|DNM2|SNX9|PICALM|SEC31A|STON1|AGFG1|RAB1A|NECAP2|REPS1|FCHO2|GDI1|…
COMPARTMENTS	Membrane-bounded organelle	1.78e-15	3031	2.16e-17	1.47496	GOCC:0043227	9083	348	RALA|BAIAP2L1|DVL2|RANBP9|MRI1|PSMC4|YTHDC2|EFNB1|SNAP29|TAB1|PYGB|PSMD10|RP2|CSK|EHD4|RIPK2|TBC1D17|NAMPT|SNX8|SERPINE1|PSMA2|YKT6|SEC61B|ACTA2|RPL19|GALK1|SLC25A11|LRRC59|CD82|ARPC3|RAB35|SNX17|DOK1|DDX39A|ADGRE5|PLCG1|VASP|TRAP1|CANX|PMPCB|SNAP23|TSG101|HIP1R|GRWD1|WDR44|LGALS3|PI4KA|RRAS2|CCNB1|NOTCH2|ARF3|TBRG4|ITGAV|PSMC1|IPO5|MPP5|PSMD11|TAOK1|ANKRD13A|PDGFRB|HACD3|SNX1|COTL1|SMURF2|RAB2A|…
GO Cellular Component	Membrane-bounded organelle	5.59e-15	3031	1.01e-16	1.42526	GO:0043227	13188	448	ARF5|RALA|BAIAP2L1|DVL2|RANBP9|MRI1|PSMC4|YTHDC2|EFNB1|SNAP29|TAB1|PYGB|AHCY|PSMD10|RP2|CSK|EHD4|RIPK2|TBC1D17|CDC37|NAMPT|MPP6|SNX8|AIMP2|SERPINE1|PSMA2|YKT6|SEC61B|AK1|ACTA2|RPL19|GALK1|SLC25A11|LRRC59|CD82|ARPC3|RAB35|SNX17|DOK1|SLC1A4|DDX39A|ADGRE5|PLCG1|VASP|TRAP1|CANX|PMPCB|SNAP23|TSG101|NECTIN2|HIP1R|GRWD1|WDR44|LGALS3|PI4KA|RRAS2|CCNB1|NOTCH2|ARF3|PRPH|CCT7|TBRG4|ITGAV|PSMC1|IPO5|MPP5|PSM…
GO Biological Process	Mesenchymal cell migration	0.0417	3031	0.0018	0.137986	GO:0090497	59	7	EFNB1|NRP1|CDH2|TPBG|PHACTR4|CORO1C|CDC42
GO Biological Process	Mesenchyme development	0.0331	3031	0.0014	0.148017	GO:0060485	238	16	EFNB1|ACTA2|EXOC4|PDGFRB|PDCD6|NRP1|CDH2|NRG1|BASP1|DLG5|PHACTR4|CORO1C|YAP1|RPS7|CTNNB1|CDC42
Reactome Pathways	MET activates PTK2 signaling	0.0163	3031	0.0022	0.178781	HSA-8874081	30	5	ITGA2|ITGA3|MET|PTK2|ITGB1
Reactome Pathways	MET activates RAP1 and RAC1	0.0342	3031	0.0055	0.146597	HSA-8875555	11	3	CRK|MET|RAP1A
Reactome Pathways	MET activates RAS signaling	0.0053	3031	0.00054	0.227572	HSA-8851805	11	4	RANBP9|MET|NRAS|SHC1
WikiPathways	MET in type 1 papillary renal cell carcinoma	1.46e-05	3031	3e-07	0.483565	WP4205	58	12	PLCG1|MAP2K2|CBL|CRK|MAP2K1|PAK2|MET|PTK2|NRAS|RAP1A|RPL11|CDC42
Reactome Pathways	MET promotes cell motility	0.003	3031	0.00026	0.252288	HSA-8875878	41	7	ITGA2|CRK|ITGA3|MET|PTK2|RAP1A|ITGB1
Reactome Pathways	Post NMDA receptor activation events	0.0018	3031	0.00014	0.274473	HSA-438064	80	10	TUBB4A|PRKAR2A|NRG1|TUBB6|TUBB3|TUBB4B|DLG1|NRAS|PRKAB1|TUBA1C
KEGG Pathways	Metabolic pathways	0.0396	3031	0.0133	0.14023	hsa01100	1435	54	MRI1|PYGB|AHCY|NAMPT|AK1|GALK1|PLCG1|PI4KA|HACD3|ACAT1|PIK3C2A|PFKL|PGD|QDPR|RPIA|AKR1B1|ATP5MF|RPN1|INPPL1|HPRT1|PFAS|UGDH|NQO1|PKM|ENO3|PLCB1|SRR|ACSL4|ATP5F1C|GMPPA|COMT|NSDHL|PIP4K2A|SRM|APRT|ITPA|GART|ASNS|BLVRA|TKT|DDOST|MPST|GMPS|ATP6V1C1|NNMT|PLCB3|COASY|PIP5K1C|ADSL|PHGDH|MTAP|ENO1|MTHFD1|AMPD2
WikiPathways	Metabolic pathways of fibroblasts	0.0012	3031	6.79e-05	0.292082	WP5312	32	7	PLCG1|UGDH|RHOA|SLC2A1|SERPINH1|SLC1A5|PHGDH
GO Biological Process	Metabolic process	0.0104	3031	0.00035	0.198297	GO:0008152	7988	259	MRI1|PSMC4|SNAP29|TAB1|PYGB|TPD52L2|AHCY|CSK|RIPK2|TBC1D17|NAMPT|AIMP2|SERPINE1|PSMA2|SEC61B|AK1|RPL19|GALK1|SNX17|DDX39A|PLCG1|CANX|PMPCB|TSG101|NUMBL|GRWD1|LGALS3|EFR3A|PI4KA|CCNB1|TBRG4|ITGAV|PSMC1|MPP5|PSMD11|TAOK1|AARS1|PDGFRB|HACD3|SMURF2|AJUBA|MAP2K2|CBL|CUL3|RAB7A|NRP1|PRKAR2A|ACAT1|PIK3C2A|IDE|VPS37B|PFKL|SCYL1|PGD|EGFR|NONO|VPS51|USP15|QDPR|RPIA|SH3RF1|AKR1B1|UBE2L6|ZDHHC5|NRG1|MYO1E|AT…
WikiPathways	Metabolic reprogramming in colon cancer	0.00019	3031	7.19e-06	0.372125	WP4290	42	9	PFKL|PGD|RPIA|PKM|GART|TKT|SLC2A1|SLC1A5|ENO1
Reactome Pathways	Metabolism	3.45e-07	3031	6.95e-09	0.646218	HSA-1430728	2092	103	MRI1|PSMC4|PYGB|AHCY|PSMD10|NAMPT|AIMP2|PSMA2|AK1|RPL19|GALK1|SLC25A11|PLCG1|TRAP1|PI4KA|ARF3|PSMC1|PSMD11|HACD3|SLC9A1|PRKAR2A|ACAT1|PIK3C2A|IQGAP1|PFKL|PGD|QDPR|RPIA|AKR1B1|GNAQ|ATP5MF|INPPL1|HPRT1|SEC23A|CSPG4|ACAD9|GNAI2|PFAS|CPNE1|RPS15A|UGDH|NQO1|PKM|ENO3|PPP2R1A|BGN|PLCB1|SRR|ACSL4|RPS2|RPLP1|RPS3A|PSMD12|ATP5F1C|CYB5R3|COMT|RAP1A|NSDHL|CMPK1|STXBP1|PIP4K2A|SRM|ACOT7|APRT|ITPA|SBF1|SDC1|GA…
Reactome Pathways	Metabolism of amino acids and derivatives	6.2e-08	3031	1e-09	0.720761	HSA-71291	368	35	MRI1|PSMC4|AHCY|PSMD10|AIMP2|PSMA2|RPL19|PSMC1|PSMD11|ACAT1|QDPR|RPS15A|NQO1|SRR|RPS2|RPLP1|RPS3A|PSMD12|SRM|PSME1|ASNS|RPL34|RPL6|MPST|RPL10|TXNRD1|RPS13|NNMT|RPS4Y2|PHGDH|MTAP|RPL9|RPS7|RPL11|RPS27
Reactome Pathways	Metabolism of carbohydrates	0.0136	3031	0.0018	0.186646	HSA-71387	292	18	PYGB|GALK1|SLC25A11|SLC9A1|PFKL|PGD|RPIA|AKR1B1|CSPG4|PKM|ENO3|PPP2R1A|BGN|SDC1|TKT|SLC2A1|PPP2R5D|ENO1
Reactome Pathways	Metabolism of nucleotides	0.0018	3031	0.00015	0.274473	HSA-15869	97	11	AK1|HPRT1|PFAS|CMPK1|APRT|ITPA|GART|GMPS|TXNRD1|ADSL|AMPD2
Reactome Pathways	Metabolism of polyamines	0.00082	3031	6.13e-05	0.308619	HSA-351202	57	9	PSMC4|PSMD10|PSMA2|PSMC1|PSMD11|NQO1|PSMD12|SRM|PSME1
Reactome Pathways	Metabolism of proteins	5.36e-07	3031	1.15e-08	0.627084	HSA-392499	1917	96	ARF5|PSMC4|TAB1|PSMD10|RIPK2|AIMP2|PSMA2|YKT6|SEC61B|RPL19|RAB35|EXOC2|CANX|EXOC4|ARF3|CCT7|PSMC1|PSMD11|AARS1|SMURF2|RAB2A|NAPA|ARCN1|TUBB4A|CUL3|RAB10|RAB7A|IDE|CDH2|CCT6A|CCT5|USP15|ANK3|GNAQ|UBE2L6|RPN1|COPS2|SEC23A|RAB1B|SRP68|TCP1|RPS15A|TUBB6|TUBB3|FARSA|TUFM|NAPG|COPG1|EIF4A2|HGS|RAB12|PRMT3|RAB11B|EXOC7|PARK7|TUBB4B|RPS2|RPLP1|RPS3A|PSMD12|COPS5|GMPPA|RAB13|MAP3K7|RARS2|DPM1|YARS1|EIF2S2…
Reactome Pathways	Metabolism of RNA	0.0043	3031	0.00042	0.236653	HSA-8953854	705	36	PSMC4|PSMD10|PSMA2|RPL19|DDX39A|PSMC1|PSMD11|IGF2BP1|RPS15A|PPP2R1A|HNRNPM|EIF4A2|FTSJ1|XPOT|RPS2|RPLP1|RPS3A|PSMD12|PCBP2|PSME1|LUC7L3|RPL34|GSPT1|RPL6|RPL10|POLR2H|DDX46|RPS13|RAN|RPS4Y2|RPL9|RPS7|RPL11|EIF4A3|TTC37|RPS27
Reactome Pathways	Metabolism of water-soluble vitamins and cofactors	0.0211	3031	0.003	0.167572	HSA-196849	123	10	NAMPT|CYB5R3|ABCC1|SLC2A1|GPHN|PARP14|PARP10|NNMT|COASY|MTHFD1
WikiPathways	Methionine de novo and salvage pathway	0.0357	3031	0.0041	0.144733	WP3580	21	4	MRI1|AHCY|SRM|MTAP
UniProt Keywords	Methylation	0.0018	3031	0.00011	0.274473	KW-0488	973	48	RALA|YKT6|ACTA2|CDC42EP1|RRAS2|CCT7|BCAR3|RAB7A|VPS37B|RALB|EGFR|NONO|RPIA|ZDHHC5|BCR|RAB1B|DNAJA2|RAP2B|MPDZ|PKM|LASP1|HNRNPM|RAB11B|MINK1|PDLIM7|PHLDB1|TAGLN2|RAB13|NRAS|RAP1A|CNN3|AHNAK|SBF1|SLC25A6|PKP4|WASF1|TAGLN|CCT4|KIAA1522|NFIC|RHOA|EPN1|TUBA1C|SIPA1L1|ACTG1|PIP5K1C|CDC42|AMPD2
WikiPathways	MFAP5 effect on permeability and motility of endothelial cells via cytoskeleton rearrangement	0.0041	3031	0.0003	0.238722	WP4560	18	5	PLCG1|ITGAV|PXN|PTK2|MYLK
Reactome Pathways	MHC class II antigen presentation	0.00028	3031	1.69e-05	0.355284	HSA-2132295	122	14	CANX|TUBB4A|RAB7A|SEC23A|TUBB6|TUBB3|AP2A2|TUBB4B|CTSB|AP1B1|AP2A1|DNM2|SEC31A|TUBA1C
Monarch Phenotype	Microcephaly	2.36e-05	3031	3.68e-08	0.462709	HP:0000252	1080	63	EFNB1|SNAP29|AHCY|AIMP2|GALK1|SLC1A4|PMPCB|PI4KA|MPP5|TAOK1|AARS1|PDGFRB|SLC12A2|ARCN1|TUBB4A|CDH11|VPS51|QDPR|YWHAG|ITGA3|VPS37A|RPS15A|FMN2|UGDH|TUBB3|TUFM|PPP2R1A|RAB11B|EXOC7|EPB41L1|EZR|ACSL4|PSMD12|ANKLE2|GMPPA|LONP1|CYB5R3|KIF14|RARS2|NSDHL|CHUK|DPM1|STXBP1|ITPA|SBF1|ASNS|FAT4|PPP1R12A|RAB3GAP1|RPL10|EIF2B1|SLC2A1|DAG1|ACTG1|COASY|ADSL|PHGDH|CASK|RPS7|CTNNB1|RPL11|CDC42|AMPD2
Monarch Phenotype	Micrognathia	0.0158	3031	0.00026	0.180134	HP:0000347	659	35	PI4KA|RRAS2|NOTCH2|MPP5|PDGFRB|SLC12A2|ARCN1|CBL|RPS15A|TUBB3|PSMD12|ANKLE2|MYPN|KIF14|MAP3K7|NRAS|GNAI3|NSDHL|DPM1|ASNS|FAT4|PPP1R12A|RAB3GAP1|RPL10|FLNB|SERPINH1|ITGA7|ACTG1|COASY|PHGDH|CASK|RPS7|RPL11|TPM2|EIF4A3
KEGG Pathways	MicroRNAs in cancer	1.82e-05	3031	1.3e-06	0.473993	hsa05206	159	18	PLCG1|NOTCH2|PDGFRB|MAP2K2|EGFR|IGF2BP1|ITGA5|CRK|MAP2K1|MET|EZR|TPM1|NRAS|FSCN1|ABCC1|RHOA|SHC1|RDX
WikiPathways	MicroRNAs in cardiomyocyte hypertrophy	0.00078	3031	4.12e-05	0.310791	WP1544	83	11	TAB1|MAP2K2|NRG1|MAP2K1|MYLK|CHUK|IL6ST|PPP3CB|NFATC4|RHOA|CTNNB1
COMPARTMENTS	Microtubule	0.0033	3031	0.00015	0.248149	GOCC:0005874	233	18	CCT7|MAP2K2|TUBB4A|CUL3|IQGAP1|CCT6A|CCT5|TCP1|TUBB6|TUBB3|TUBB4B|DLG1|KIF14|ARHGAP18|MAPRE1|DNM2|CCT4|BCAS3
GO Cellular Component	Microtubule	0.0461	3031	0.0047	0.13363	GO:0005874	453	23	CCT7|MAP2K2|TUBB4A|CUL3|IQGAP1|CCT6A|CCT5|TCP1|TUBB6|NUDC|TUBB3|TUBB4B|DLG1|KIF14|ARHGAP18|NEK6|MAPRE1|DNM2|CCT4|CDK5|TUBA1C|BCAS3|HSPH1
COMPARTMENTS	Microtubule cytoskeleton	0.0001	3031	3.37e-06	0.4	GOCC:0015630	973	53	RANBP9|SNAP29|RP2|SLC1A4|CCNB1|CCT7|AJUBA|MAP2K2|TUBB4A|CUL3|PRKAR2A|PXN|IQGAP1|SCYL1|ARL8A|CCT6A|CCT5|FLCN|GNAI2|TCP1|VPS37A|TUBB6|NUDC|TUBB3|PPP2R1A|EXOC7|PTK2|TUBB4B|DLG1|KIF14|ARHGAP18|MPP1|GNAI3|PKN2|DLG5|NEK6|CLIC4|MAPRE1|NAA40|DNM2|PKP4|CCT4|PPP1R12A|ANXA11|C2CD5|TUBA1C|RAN|YES1|BCAS3|ARL8B|CTNNB1|CDC42|ARHGAP35
GO Cellular Component	Microtubule cytoskeleton	2.95e-06	3031	1.24e-07	0.553018	GO:0015630	1355	72	RANBP9|SNAP29|RP2|ACTA2|SLC1A4|TSG101|CCNB1|CCT7|TAOK1|AJUBA|MAP2K2|EHD2|EHBP1|TUBB4A|CUL3|PRKAR2A|PXN|IQGAP1|SCYL1|ARL8A|CCT6A|CCT5|FLCN|RAPGEF6|MAP2K1|GNAI2|TCP1|VPS37A|TUBB6|FMN2|NUDC|TUBB3|PPP2R1A|EXOC7|EZR|PTK2|TUBB4B|SEPTIN6|DLG1|ITSN2|KIF14|ARHGAP18|MPP1|GNAI3|PKN2|DLG5|NEK6|CLIC4|MAPRE1|NAA40|SEPTIN8|DNM2|PKP4|CCT4|PPP1R12A|ANXA11|SEPTIN7|NSFL1C|CDK5|C2CD5|TUBA1C|RAN|YES1|BCAS3|CCDC124|AR…
GO Biological Process	Microtubule cytoskeleton organization	0.0055	3031	0.00017	0.225964	GO:0000226	542	31	RANBP9|CCNB1|TAOK1|TUBB4A|DNAAF5|TUBB6|FMN2|NUDC|TUBB3|LLGL1|PPP2R1A|EZR|TUBB4B|DLG1|SLK|NEK6|PARD3|MAPRE1|ITGB1|PPP1R12A|RHOA|PHLDB2|NSFL1C|CDK5|CFL1|DAG1|TUBA1C|RAN|BCAS3|SRGAP2C|CTNNB1
WikiPathways	Microtubule cytoskeleton regulation	0.024	3031	0.0025	0.161979	WP2038	46	6	TAOK1|GNAQ|MAPRE1|EPHB2|PHLDB2|CDC42
COMPARTMENTS	Microtubule organizing center	0.0316	3031	0.002	0.150031	GOCC:0005815	607	30	SNAP29|RP2|SLC1A4|CCNB1|AJUBA|CUL3|PRKAR2A|SCYL1|CCT5|FLCN|GNAI2|TCP1|VPS37A|EXOC7|PTK2|MPP1|GNAI3|PKN2|DLG5|NEK6|CLIC4|MAPRE1|NAA40|CCT4|PPP1R12A|C2CD5|RAN|YES1|CTNNB1|ARHGAP35
GO Cellular Component	Microtubule organizing center	0.004	3031	0.00029	0.239794	GO:0005815	825	41	SNAP29|RP2|SLC1A4|TSG101|CCNB1|AJUBA|EHBP1|CUL3|PRKAR2A|SCYL1|CCT5|FLCN|RAPGEF6|MAP2K1|GNAI2|TCP1|VPS37A|EXOC7|EZR|PTK2|ITSN2|MPP1|GNAI3|PKN2|DLG5|NEK6|CLIC4|MAPRE1|NAA40|DNM2|CCT4|PPP1R12A|NSFL1C|C2CD5|RAN|YES1|CCDC124|RPS7|CTNNB1|CDC42|ARHGAP35
GO Biological Process	Microtubule-based process	0.0099	3031	0.00033	0.200436	GO:0007017	803	40	RANBP9|CCNB1|TAOK1|ACTR3|TUBB4A|ARL8A|DNAAF5|TUBB6|FMN2|NUDC|TUBB3|LLGL1|PPP2R1A|COPG1|EZR|TUBB4B|DLG1|ATP2B4|KIF14|SLK|NEK6|PARD3|MAPRE1|WASF1|ITGB1|RAB1A|PPP1R12A|RHOA|PHLDB2|NSFL1C|CDK5|CFL1|DAG1|TUBA1C|RAN|BCAS3|SRGAP2C|ARL8B|CTNNB1|CDC42
Reactome Pathways	Microtubule-dependent trafficking of connexons from Golgi to the plasma membrane	0.0039	3031	0.00037	0.240894	HSA-190840	19	5	TUBB4A|TUBB6|TUBB3|TUBB4B|TUBA1C
GO Cellular Component	Microvillus	0.0048	3031	0.00037	0.231876	GO:0005902	91	10	EXOC4|ITGAV|MYO1E|FMN2|EZR|MSN|CLIC4|FSCN1|CTNNB1|RDX
COMPARTMENTS	Midbody	2.56e-08	3031	5e-10	0.759176	GOCC:0030496	142	22	TSG101|VPS37B|IQGAP1|ARL8A|RALB|ARF6|GNAI2|NUDC|ANXA2|KIF14|GNAI3|PKN2|CLIC4|PKP4|CTNND1|GDI1|ANXA11|SLC2A1|RAN|ARL8B|SH3GLB1|CDC42
GO Cellular Component	Midbody	2.64e-13	3031	5.03e-15	1.25784	GO:0030496	201	33	RALA|EXOC2|TSG101|EXOC4|VPS37B|IQGAP1|ARL8A|RALB|ARF6|GNAI2|NUDC|EXOC7|SEPTIN6|ANXA2|KIF14|GNAI3|PKN2|CLIC4|DNM2|PKP4|CTNND1|GDI1|ANXA11|RHOA|SEPTIN7|SLC2A1|RAN|CCDC124|ARL8B|SEPTIN2|SH3GLB1|RDX|CDC42
Monarch Phenotype	Midface retrusion	0.0065	3031	8.49e-05	0.218709	HP:0011800	243	19	RRAS2|PDGFRB|MAP2K2|CBL|CDH11|INPPL1|SEC23A|FTSJ1|ACSL4|NRAS|WASF1|FAT4|GDI1|RAB3GAP1|PPP2R5D|FLNB|SERPINH1|CDC42|AMPD2
KEGG Pathways	Mitophagy - animal	0.0114	3031	0.0028	0.19431	hsa04137	64	7	TBC1D17|RRAS2|RAB7A|USP15|NRAS|OPTN|TBC1D15
Reactome Pathways	Mitotic Anaphase	0.0001	3031	4.73e-06	0.4	HSA-68882	232	21	PSMC4|PSMD10|PSMA2|CCNB1|PSMC1|PSMD11|TAOK1|TUBB4A|TUBB6|NUDC|TUBB3|PPP2R1A|TUBB4B|PSMD12|ANKLE2|MAPRE1|PSME1|PPP2R5D|TUBA1C|RAN|RPS27
GO Biological Process	Mitotic cell cycle	0.001	3031	2.48e-05	0.3	GO:0000278	631	37	RAB35|EXOC2|EXOC4|CCNB1|TAOK1|TUBB4A|CUL3|RASA1|ANK3|TUBB6|NUDC|TUBB3|PPP2R1A|EXOC7|PLCB1|TUBB4B|SEPTIN6|SNX18|ANKLE2|IQGAP3|KIF14|NEK6|MAPRE1|DNM2|SNX9|ITGB1|PPP1R12A|GSPT1|RHOA|CUL2|NSFL1C|CDK5|PBK|CFL1|TUBA1C|RAN|EPS8
GO Biological Process	Mitotic cell cycle process	0.0095	3031	0.00032	0.202228	GO:1903047	537	30	RAB35|EXOC2|EXOC4|CCNB1|TAOK1|CUL3|RASA1|ANK3|NUDC|PPP2R1A|EXOC7|PLCB1|SEPTIN6|SNX18|ANKLE2|IQGAP3|KIF14|NEK6|MAPRE1|DNM2|SNX9|ITGB1|GSPT1|RHOA|CUL2|NSFL1C|CDK5|CFL1|RAN|EPS8
GO Biological Process	Mitotic cytokinesis	0.0017	3031	4.55e-05	0.276955	GO:0000281	84	11	RAB35|EXOC2|EXOC4|RASA1|ANK3|EXOC7|SEPTIN6|SNX18|SNX9|RHOA|CFL1
Reactome Pathways	Mitotic Prometaphase	0.0147	3031	0.002	0.183268	HSA-68877	201	14	CCNB1|TAOK1|TUBB4A|YWHAG|TUBB6|NUDC|TUBB3|PPP2R1A|TUBB4B|NEK6|MAPRE1|PPP2R5D|TUBA1C|RPS27
STRING Clusters	Mixed, incl. Actin filament organization, and CDC42 GTPase cycle	1.33e-12	3031	3e-16	1.18761	CL:17810	193	34	ARPC3|VASP|COTL1|ACTR3|PXN|IQGAP1|DOCK11|ABI2|PAK2|FMN2|FMNL3|ARHGEF1|PLS3|GMFB|NCKAP1|IQGAP3|CDC42BPA|ABI1|FSCN1|WASF1|ILK|ARPC1B|CORO1C|RHOA|FNBP1|FLNB|CFL1|TLN2|ACTG1|WASF2|DOCK10|EPS8|CDC42|ARHGAP35
STRING Clusters	Mixed, incl. Apical junction complex, and Hippo signaling pathway - multiple species	1.12e-07	3031	7.32e-11	0.695078	CL:21713	183	26	MPP5|TAOK1|CDH6|CDH11|CDH2|CTNNA1|MPDZ|LLGL1|TP53BP2|FRMD6|SCRIB|PTPN14|AMOT|DLG5|STK4|PARD3|PKP4|FAT4|CTNND1|MAGI1|AMOTL1|AMOTL2|TJP2|YAP1|CASK|CTNNB1
STRING Clusters	Mixed, incl. Cell-cell junction organization, and Bicellular tight junction	0.0003	3031	1.18e-06	0.352288	CL:21715	125	16	MPP5|CDH6|CDH11|CDH2|CTNNA1|LLGL1|SCRIB|DLG5|PARD3|PKP4|FAT4|CTNND1|MAGI1|TJP2|CASK|CTNNB1
STRING Clusters	Mixed, incl. Constitutive Signaling by Aberrant PI3K in Cancer, and SH2 domain superfamily	0.0091	3031	0.00015	0.204096	CL:17325	171	15	CSK|DOK1|PLCG1|PDGFRB|CBL|EGFR|NRG1|CRK|BCR|MET|PTK2|FYN|SHC1|YES1|SH3GLB1
STRING Clusters	Mixed, incl. Constitutive Signaling by Aberrant PI3K in Cancer, and SH2 domain superfamily	0.0386	3031	0.00096	0.141341	CL:17326	164	13	CSK|DOK1|PLCG1|PDGFRB|CBL|EGFR|NRG1|CRK|BCR|MET|PTK2|FYN|SHC1
STRING Clusters	Mixed, incl. Contractile fiber, and Microfilament motor activity	0.0386	3031	0.00095	0.141341	CL:22563	185	14	ACTA2|CNN1|MYO1E|PDLIM7|TPM1|MYPN|KIRREL1|MYLK|CALD1|PDLIM1|TAGLN|GIPC1|SH3BP4|TPM2
STRING Clusters	Mixed, incl. De novo protein folding, and DnaJ domain, conserved site	0.0074	3031	0.00011	0.213077	CL:1765	48	8	TRAP1|DNAJA2|LONP1|DNAJB4|HSPA1L|AKAP12|HSPH1|HSPA12A
STRING Clusters	Mixed, incl. Domain of unknown function DUF5600, and Protein cordon-bleu-like	0.00069	3031	4.96e-06	0.316115	CL:14983	12	6	EHD4|PACSIN2|EHD2|EHBP1|EHD1|COBLL1
STRING Clusters	Mixed, incl. Exocyst, and FIP domain	0.0021	3031	2.2e-05	0.267778	CL:13575	37	8	RALA|EXOC2|EXOC4|RAB10|RAB11B|EXOC7|RAB13|STXBP3
WikiPathways	Androgen receptor network in prostate cancer	0.0376	3031	0.0044	0.142481	WP2263	109	9	MAP2K2|PXN|RASA1|BAX|CRK|MAP2K1|CASP8|RAP1A|JAK1
STRING Clusters	Mixed, incl. Hippo signaling pathway - multiple species, and Short repeats in human TONDU, fly vestigial and other proteins.	0.00095	3031	8.06e-06	0.302228	CL:21969	55	10	TAOK1|MPDZ|TP53BP2|FRMD6|PTPN14|AMOT|STK4|AMOTL1|AMOTL2|YAP1
STRING Clusters	Mixed, incl. Hippo signaling pathway - multiple species, and Short repeats in human TONDU, fly vestigial and other proteins.	0.0017	3031	1.59e-05	0.276955	CL:21970	47	9	MPDZ|TP53BP2|FRMD6|PTPN14|AMOT|STK4|AMOTL1|AMOTL2|YAP1
STRING Clusters	Mixed, incl. Inhibition of exosome biogenesis and secretion by Manumycin A in CRPC cells, and Cardiofaciocutaneous syndrome	0.0021	3031	2.16e-05	0.267778	CL:17673	26	7	RRAS2|MAP2K2|RALB|RASA1|MAP2K1|NRAS|RAP1A
STRING Clusters	Mixed, incl. Inhibition of exosome biogenesis and secretion by Manumycin A in CRPC cells, and Ras GTPase-activating protein	0.0018	3031	1.85e-05	0.274473	CL:17670	36	8	RRAS2|MAP2K2|RALB|RASA1|MAP2K1|RASA3|NRAS|RAP1A
STRING Clusters	Mixed, incl. Inositol phosphate metabolism, and Charcot-Marie-Tooth disease type 4	0.0499	3031	0.0014	0.13019	CL:15078	110	10	EFR3A|PI4KA|PIK3C2A|INPPL1|MPZL1|PIP4K2A|SBF1|PLCB3|PIP5K1C|PCMT1
STRING Clusters	Mixed, incl. Lead ion binding, and SOUL haem-binding protein	0.0499	3031	0.0014	0.13019	CL:30304	6	3	PDCD6|SRI|ANXA7
STRING Clusters	Mixed, incl. Membrane coat, and Sec7, C-terminal domain superfamily	7.89e-05	3031	1.21e-07	0.410292	CL:13766	118	17	ARF5|TPD52L2|HIP1R|ARF3|CYTH3|ARF6|AP2A2|ITSN2|AP1B1|AP2A1|DNM2|PICALM|NECAP2|REPS1|FCHO2|EPN1|CLINT1
STRING Clusters	Mixed, incl. p21 activated kinase binding domain, and RasGAP C-terminus	0.016	3031	0.0003	0.179588	CL:18036	18	5	PXN|IQGAP1|PAK2|IQGAP3|CDC42
STRING Clusters	Mixed, incl. Plasma membrane tubulation, and RHOB GTPase cycle	5.64e-05	3031	7.39e-08	0.424872	CL:14979	50	12	EHD4|PACSIN2|EHD2|EHBP1|ARHGAP1|DNMBP|MTSS2|SLK|PKN2|EHD1|PPP1R18|COBLL1
STRING Clusters	Mixed, incl. Plasma membrane tubulation, and RHOB GTPase cycle	8.09e-05	3031	1.49e-07	0.409205	CL:14980	43	11	EHD4|PACSIN2|EHD2|EHBP1|DNMBP|MTSS2|SLK|PKN2|EHD1|PPP1R18|COBLL1
STRING Clusters	Mixed, incl. Plasma membrane tubulation, and RHOB GTPase cycle	0.00087	3031	7.24e-06	0.306048	CL:14981	31	8	EHD4|PACSIN2|EHD2|EHBP1|SLK|PKN2|EHD1|COBLL1
STRING Clusters	Mixed, incl. Post-chaperonin tubulin folding pathway, and Microtubule end	0.0018	3031	1.77e-05	0.274473	CL:26373	75	11	TUBB4A|TUBB6|TUBB3|TUBB4B|TAGLN2|CNN3|MAPRE1|TAGLN3|PHLDB2|TUBA1C|CNN2
STRING Clusters	Mixed, incl. Profilin binding, and Sequestering of actin monomers	0.0402	3031	0.0011	0.139577	CL:17882	25	5	VASP|COTL1|PLS3|FSCN1|ACTG1
STRING Clusters	Mixed, incl. Protein serine/threonine phosphatase complex, and Phosphatase regulator activity	0.0282	3031	0.00064	0.154975	CL:8023	177	14	PPP1R12C|ANKRD52|PPP2R1A|NEXN|ARHGAP12|MINK1|PPP3CB|KIAA1522|NFATC4|PPP1R12A|PPP2R5D|CDK5|C2CD5|PPP1R9B
STRING Clusters	Mixed, incl. Rab GDI protein, and Warburg micro syndrome 4	0.00072	3031	5.37e-06	0.314267	CL:13543	6	5	RAB1B|GDI2|AGFG1|RAB1A|GDI1
STRING Clusters	Mixed, incl. RAB geranylgeranylation, and Regulation of SNARE complex assembly	0.0386	3031	0.00094	0.141341	CL:13439	68	8	RAB7A|RAB1B|GDI2|AGFG1|RAB1A|GDI1|RAB3GAP1|ARL8B
STRING Clusters	Mixed, incl. RAB geranylgeranylation, and Vesicle tethering complex	8.09e-05	3031	1.6e-07	0.409205	CL:13438	106	16	RALA|EXOC2|EXOC4|RAB10|RAB7A|RAB1B|RAB11B|EXOC7|RAB13|STXBP3|GDI2|AGFG1|RAB1A|GDI1|RAB3GAP1|ARL8B
STRING Clusters	Mixed, incl. Regulation of actin dynamics for phagocytic cup formation, and CDC42 GTPase cycle	1.33e-12	3031	2.92e-16	1.18761	CL:17811	155	31	ARPC3|VASP|COTL1|ACTR3|PXN|IQGAP1|DOCK11|ABI2|PAK2|FMN2|FMNL3|ARHGEF1|PLS3|GMFB|NCKAP1|IQGAP3|CDC42BPA|ABI1|FSCN1|WASF1|ARPC1B|CORO1C|RHOA|FNBP1|CFL1|ACTG1|WASF2|DOCK10|EPS8|CDC42|ARHGAP35
STRING Clusters	Mixed, incl. RHO GTPases Activate WASPs and WAVEs, and Actin nucleation	3.47e-07	3031	3.04e-10	0.645967	CL:17813	75	17	ARPC3|VASP|COTL1|ACTR3|ABI2|FMN2|FMNL3|PLS3|NCKAP1|ABI1|FSCN1|WASF1|ARPC1B|FNBP1|ACTG1|WASF2|EPS8
STRING Clusters	Mixed, incl. RHO GTPases Activate WASPs and WAVEs, and ADF-H/Gelsolin-like domain superfamily	6.25e-06	3031	6.83e-09	0.520412	CL:17814	59	14	ARPC3|VASP|COTL1|ACTR3|ABI2|PLS3|NCKAP1|ABI1|FSCN1|WASF1|ARPC1B|ACTG1|WASF2|EPS8
STRING Clusters	Mixed, incl. Rho protein signal transduction, and p21 activated kinase binding domain	0.0031	3031	3.69e-05	0.250864	CL:17972	53	9	PXN|IQGAP1|PAK2|ARHGEF1|IQGAP3|RHOA|CFL1|CDC42|ARHGAP35
STRING Clusters	Mixed, incl. Rho protein signal transduction, and P21-Rho-binding domain	0.00017	3031	4.82e-07	0.376955	CL:17971	61	12	PXN|IQGAP1|DOCK11|PAK2|ARHGEF1|IQGAP3|CDC42BPA|RHOA|CFL1|DOCK10|CDC42|ARHGAP35
STRING Clusters	Mixed, incl. Septin ring, and Cdc42 effector	0.0142	3031	0.00026	0.184771	CL:30780	41	7	CDC42EP1|SEPTIN6|SEPTIN8|NHS|SEPTIN7|SEPTIN2|CDC42EP3
STRING Clusters	Mixed, incl. Small GTPase, Ras-type, and Ras-like guanine nucleotide exchange factor, N-terminal	0.00034	3031	1.47e-06	0.346852	CL:17667	56	11	RRAS2|MAP2K2|RAPGEF2|RALB|RASA1|RAPGEF6|MAP2K1|RASA3|MAP4K4|NRAS|RAP1A
GO Biological Process	Modulation of chemical synaptic transmission	0.0094	3031	0.00031	0.202687	GO:0050804	436	26	SLC12A2|PACSIN2|RAPGEF2|CDH11|CDH2|BCR|ABR|YWHAG|GNAI2|PLCB1|FYN|RAP1A|STXBP1|GIPC1|PPP3CB|ITGB1|EPHB2|AKAP12|NFATC4|RAB3GAP1|CDK5|SIPA1L1|PPP1R9B|CYFIP1|CASK|EIF4A3
GO Molecular Function	Molecular adaptor activity	9.42e-08	3031	8.79e-10	0.702595	GO:0060090	385	36	DVL2|SNAP29|AIMP2|YKT6|SNAP23|HIP1R|MAP2K2|NAPA|SLC9A1|PDCD6|IQGAP1|ANK3|SH3RF1|ABI2|CRK|MAP2K1|NAPG|AP2A2|SEPTIN6|DLG1|ITSN2|AP2A1|DLG5|ABI1|SEPTIN8|OPTN|TRIM5|FSCN1|STON1|MAGI1|SHC1|SEPTIN7|CUL2|TJP2|SEPTIN2|EPS8
GO Molecular Function	Molecular function regulator activity	1.51e-10	3031	9.82e-13	0.982102	GO:0098772	1960	110	RALA|TAB1|RP2|TBC1D17|CDC37|NAMPT|SERPINE1|LGALS3|CCNB1|BCAR3|IPO5|TAOK1|HACD3|MAP2K2|PPP1R12C|FARP2|RAPGEF2|RAB10|RAB7A|NRP1|PRKAR2A|SRI|IQGAP1|RALB|RASA1|EGFR|DOCK11|FLCN|GNAQ|NRG1|CSTB|ANXA5|RAPGEF6|CYTH3|ARF6|MAP2K1|BCR|ABR|YWHAG|SEC23A|RAB1B|ARHGAP1|DNAJA2|PAK2|DNMBP|RAP2B|LLGL1|PPP2R1A|RIC8A|RAB11B|RASA3|ARHGEF1|PLCB1|PARK7|RAP1GDS1|MTSS2|DLG1|ARHGAP12|ANXA2|RPLP1|FYN|SRGAP1|ITSN2|ATP2B4|AN…
GO Biological Process	Morphogenesis of a branching epithelium	0.0086	3031	0.00028	0.20655	GO:0061138	162	14	NRP1|MMP14|MET|DLG1|EPHA2|DLG5|STK4|CLIC4|PLXNA1|ILK|NFATC4|DAG1|YAP1|CTNNB1
GO Biological Process	Morphogenesis of a polarized epithelium	0.0204	3031	0.00077	0.169037	GO:0001738	50	7	RAB10|SCRIB|MSN|DLG5|RHOA|ACTG1|CDC42
GO Biological Process	Morphogenesis of an epithelial sheet	3.8e-05	3031	6.54e-07	0.442022	GO:0002011	51	11	DVL2|NOTCH2|MPP5|AJUBA|ITGA5|ARHGAP12|PHACTR4|ITGB1|RHOA|DAG1|ARHGAP35
GO Biological Process	Morphogenesis of an epithelium	1.05e-05	3031	1.58e-07	0.497881	GO:0002009	457	35	RALA|DVL2|VASP|NOTCH2|MPP5|AJUBA|RAB10|NRP1|EGFR|ITGA5|MMP14|MET|DLG1|ARHGAP12|SCRIB|EPHA2|PLXNB2|MSN|DLG5|STK4|PHACTR4|CLIC4|PLXNA1|ITGB1|ILK|NFATC4|RHOA|DAG1|ACTG1|YAP1|RPS7|CTNNB1|CDC42|MTHFD1|ARHGAP35
GO Biological Process	Morphogenesis of embryonic epithelium	0.0319	3031	0.0013	0.149621	GO:0016331	149	12	RALA|DVL2|VASP|MPP5|SCRIB|PLXNB2|STK4|PHACTR4|RPS7|CTNNB1|MTHFD1|ARHGAP35
Monarch Phenotype	Morphological central nervous system abnormality	6.52e-05	3031	1.92e-07	0.418575	HP:0002011	2416	109	EFNB1|SNAP29|AHCY|AIMP2|SERPINE1|ACTA2|GALK1|SLC25A11|SLC1A4|PMPCB|PI4KA|RRAS2|NOTCH2|MPP5|TAOK1|AARS1|PDGFRB|SLC12A2|MAP2K2|SLC9A1|ARCN1|TUBB4A|PIK3C2A|CDH11|CDH2|SCYL1|RASA1|NONO|VPS51|CCT5|QDPR|RPIA|GNAQ|NRG1|DNAAF5|MAP2K1|YWHAG|ACAD9|ITGA3|VPS37A|RPS15A|FMN2|UGDH|MPDZ|TUBB3|TUFM|PPP2R1A|EIF4A2|FTSJ1|BGN|RAB11B|EXOC7|EPB41L1|EZR|ACSL4|SRGAP1|PSMD12|ANKLE2|EPHB4|GMPPA|MYPN|MYLK|LONP1|CYB5R3|KIF…
Monarch Phenotype	Motor delay	0.00068	3031	3.78e-06	0.316749	HP:0001270	673	41	AHCY|GALK1|SLC1A4|RRAS2|MPP5|SLC12A2|SLC9A1|ARCN1|TUBB4A|TNPO3|ACAT1|CDH2|SCYL1|NONO|VPS51|HPRT1|FMN2|UGDH|MPDZ|TUBB3|PPP2R1A|FTSJ1|RAB11B|EZR|PSMD12|MYPN|LONP1|KIF14|NRAS|STXBP1|DNM2|GARS1|WASF1|RAB3GAP1|EIF2B1|PPP2R5D|DAG1|ITGA7|CTNNB1|TPM2|AMPD2
GO Biological Process	Movement in host	3.48e-06	3031	4.66e-08	0.545842	GO:0044000	139	19	TSG101|NECTIN2|ITGAV|CBL|RAB7A|NRP1|IDE|VPS37B|EGFR|ITGA5|ITGB5|ITGA2|AXL|CTSB|EPHA2|ITGB1|DAG1|SLC1A5|ARL8B
GO Molecular Function	mRNA 5-UTR binding	0.0103	3031	0.00018	0.198716	GO:0048027	26	6	CCT5|IGF2BP1|RPS3A|RPS13|RSL1D1|RPS7
GO Biological Process	Multicellular organism development	1.23e-12	3031	4e-15	1.19101	GO:0007275	4209	196	RALA|DVL2|PSMC4|EFNB1|TAB1|CSK|RIPK2|AIMP2|SERPINE1|ACTA2|RAB35|SNX17|VASP|NUMBL|HIP1R|EXOC4|RRAS2|CCNB1|NOTCH2|BCAR3|ITGAV|MPP5|TAOK1|AARS1|PDGFRB|MAP2K2|NAPA|SLC9A1|ARCN1|CBL|FARP2|CUL3|RAPGEF2|RAB10|PDCD6|NRP1|SRI|ACAT1|IQGAP1|CDH11|CDH2|SCYL1|RASA1|EGFR|DOCK11|VPS51|ANK3|SH3RF1|FLCN|AKR1B1|NRG1|MYO1E|IGF2BP1|BAX|ITGA5|ABI2|ITGB5|ITGA2|ERAP1|INPPL1|ARF6|HPRT1|COPS2|STAT6|CRK|AXL|DIP2B|MAP2K1|B…
GO Biological Process	Multicellular organismal process	5.62e-07	3031	6.23e-09	0.625026	GO:0032501	6490	243	RALA|DVL2|PSMC4|YTHDC2|EFNB1|TAB1|AHCY|RP2|CSK|RIPK2|NAMPT|AIMP2|SERPINE1|ACTA2|RAB35|SNX17|SLC1A4|VASP|SNAP23|NECTIN2|NUMBL|HIP1R|EXOC4|RRAS2|CCNB1|NOTCH2|BCAR3|ITGAV|MPP5|TAOK1|AARS1|PDGFRB|SLC12A2|MAP2K2|NAPA|SLC9A1|ARCN1|CBL|FARP2|CUL3|RAPGEF2|RAB10|PDCD6|RAB7A|NRP1|SRI|ACAT1|PIK3C2A|IDE|PXN|IQGAP1|CDH11|CDH2|SCYL1|RASA1|EGFR|DOCK11|VPS51|ANK3|SH3RF1|FLCN|AKR1B1|GNAQ|NRG1|MYO1E|IGF2BP1|CSTB|B…
GO Biological Process	Multivesicular body assembly	0.0132	3031	0.00047	0.187943	GO:0036258	32	6	TSG101|VPS37B|VPS37A|HGS|VTA1|UBAP1
STRING Clusters	Multivesicular body assembly	0.0136	3031	0.00025	0.186646	CL:14183	28	6	TSG101|VPS37B|VPS37A|HGS|VTA1|UBAP1
TISSUES	Muscle	2.67e-11	3031	4.63e-13	1.05735	BTO:0000887	1070	75	AK1|ACTA2|RPL19|SLC25A11|RAB35|SNX17|CNN1|EXOC4|MPP5|SNX1|MAP2K2|NRP1|PFKL|NONO|VPS51|AKR1B1|ANXA5|COPS2|YWHAG|PKM|NPEPPS|ENO3|EIF4A2|RAB11B|ARHGEF1|TUBB4B|RPS2|RPLP1|RPS3A|FILIP1L|PSMD12|ATP5F1C|ATP2B4|COPS5|MYPN|AP2A1|COMT|CALD1|UTRN|CMPK1|SBF1|SLC25A6|FSCN1|PSME1|GARS1|TAGLN|GIPC1|PLXNA1|ASNS|ITGB1|BLVRA|AMOTL1|SLC4A7|ATP2B1|MPST|RPL10|FLNB|MYO10|RPS13|TJP2|PRKAB1|DAG1|ITGA7|PEAK1|TLN2|ACTG1|C…
Reactome Pathways	Muscle contraction	0.0342	3031	0.0055	0.146597	HSA-397014	203	13	ACTA2|SRI|PXN|ITGB5|PAK2|ANXA2|ATP2B4|TPM1|MYLK|CALD1|ATP2B1|ATP1A1|TPM2
STRING Clusters	Muscle protein, and Sarcomere organization	0.0499	3031	0.0014	0.13019	CL:22573	73	8	ACTA2|CNN1|TPM1|MYPN|MYLK|CALD1|TAGLN|TPM2
TISSUES	Muscular system	9.15e-13	3031	1.36e-14	1.20386	BTO:0001485	1220	85	RIPK2|AK1|ACTA2|RPL19|SLC25A11|RAB35|SNX17|ADGRE5|CNN1|EXOC4|MPP5|SNX1|MAP2K2|NRP1|PFKL|NONO|VPS51|AKR1B1|ANXA5|COPS2|YWHAG|RAB1B|VPS37A|PKM|NPEPPS|ENO3|EIF4A2|RAB11B|ARHGEF1|TUBB4B|RPS2|RPLP1|RPS3A|FILIP1L|PSMD12|ATP5F1C|ATP2B4|COPS5|MYPN|AP2A1|PCBP2|COMT|CALD1|UTRN|VTA1|CMPK1|SBF1|IL6ST|SLC25A6|FSCN1|PSME1|GARS1|TAGLN|GIPC1|PLXNA1|ASNS|ITGB1|BLVRA|AMOTL1|SLC4A7|ATP2B1|DDOST|SHC1|MPST|RPL10|FLNB…
Reactome Pathways	MyD88 cascade initiated on plasma membrane	0.0344	3031	0.0056	0.146344	HSA-975871	93	8	TAB1|RIPK2|MAP2K1|PPP2R1A|CASP8|MAP3K7|CHUK|PPP2R5D
GO Cellular Component	Myelin sheath	0.0012	3031	7.51e-05	0.292082	GO:0043209	45	8	EXOC4|MPP5|TUBB4A|DLG1|ANXA2|SCRIB|ITGB1|GDI1
GO Cellular Component	Myelin sheath abaxonal region	0.0014	3031	9.26e-05	0.285387	GO:0035748	6	4	EXOC4|DLG1|SCRIB|ITGB1
Monarch Phenotype	Myeloid white cell count	0.011	3031	0.00016	0.195861	EFO:0007988	1390	62	BAIAP2L1|EHD4|EXOC2|ADGRE5|TRAP1|CANX|NECTIN2|NOTCH2|BCAR3|PDGFRB|SLC12A2|RAB2A|FARP2|RAB7A|IQGAP1|ATP5MF|BAX|RPN1|RAPGEF6|STAT6|ABR|PAK2|MET|PLCB1|MAP4K4|CTSB|MINK1|ATP2B4|ANKLE2|CASP8|CDC42BPA|RAP1A|PDLIM1|DLG5|NEK6|PALM2AKAP2|SEPTIN8|SNX2|SEC31A|WDR6|ABCC1|AKAP12|NFIC|SHC1|TBC1D5|CUL2|SLC2A1|FLNB|CFL1|DENND2B|PRKAB1|PLCB3|ATP1A1|PEAK1|TLN2|CNN2|SIRPA|PPP1R18|COBLL1|DOCK10|TPM2|JAK1
COMPARTMENTS	Myofibril	0.0201	3031	0.0012	0.16968	GOCC:0030016	147	12	SRI|ANK3|NEXN|ATP2B4|TPM1|MYPN|PDLIM1|AHNAK|PPP1R12A|FLNB|DAG1|TPM2
GO Cellular Component	Myofibril	1.18e-05	3031	5.57e-07	0.492812	GO:0030016	237	23	SRI|ANK3|NEXN|FERMT2|PDLIM7|ATP2B4|TPM1|MYPN|CALD1|GLRX3|PDLIM1|AHNAK|PPP3CB|ILK|PPP1R12A|CORO1C|SLC2A1|FLNB|DAG1|ACTG1|CTNNB1|ENO1|TPM2
GO Molecular Function	Myosin binding	0.0045	3031	7.13e-05	0.234679	GO:0017022	73	10	RALA|RAB10|AXL|LLGL1|RAB11B|KIRREL1|IQGAP3|CALD1|GIPC1|RHOA
UniProt Keywords	Myristate	4.47e-06	3031	1.4e-07	0.534969	KW-0519	183	21	ARF5|RP2|ARF3|PSMC1|ARF6|GNAI2|PAK2|BASP1|FMNL3|FYN|CYB5R3|NIBAN1|GNAI3|NCS1|NIBAN2|NAA40|KIAA1522|AKAP12|DDX46|PRKAB1|YES1
KEGG Pathways	ECM-receptor interaction	0.0056	3031	0.0011	0.225181	hsa04512	88	9	ITGAV|ITGA5|ITGB5|ITGA2|ITGA3|SDC1|ITGB1|DAG1|ITGA7
Monarch Phenotype	Narrow face	0.0458	3031	0.001	0.133913	HP:0000275	105	10	MPP5|SLC12A2|MAP2K2|TUBB4A|PSMD12|MYPN|NSDHL|NHS|ITGA7|TPM2
STRING Clusters	Negative feedback regulation of MAPK pathway, and RAS GTPase cycle mutants	0.0074	3031	0.00011	0.213077	CL:17676	14	5	MAP2K2|RASA1|MAP2K1|NRAS|RAP1A
GO Biological Process	Negative regulation of angiogenesis	0.0233	3031	0.00089	0.163264	GO:0016525	103	10	SERPINE1|SLC12A2|HGS|ATP2B4|EPHA2|AMOT|NIBAN2|SHC1|EPN1|CTNNB1
GO Biological Process	Negative regulation of apoptotic process	7.4e-05	3031	1.37e-06	0.413077	GO:0043066	891	51	PSMD10|SERPINE1|TRAP1|HIP1R|LGALS3|NOTCH2|ITGAV|AARS1|PDGFRB|SLC9A1|CBL|NRP1|RASA1|EGFR|NONO|SH3RF1|AKR1B1|NRG1|BAX|ITGA5|ANXA5|AXL|CTNNA1|PCDHGC3|GNAI2|PAK2|FMN2|NQO1|PARK7|PTK2|MAP4K4|RPS3A|COPS5|ANKLE2|KIF14|GNAI3|STXBP1|NIBAN2|IL6ST|SLC25A6|ANXA4|ASNS|ITGB1|NFATC4|RHOA|SHC1|RPL10|CFL1|YAP1|CTNNB1|ENO1
GO Biological Process	Negative regulation of apoptotic signaling pathway	0.0043	3031	0.00013	0.236653	GO:2001234	230	18	PSMD10|SERPINE1|TRAP1|LGALS3|ITGAV|NRP1|NONO|SH3RF1|NRG1|BAX|CTNNA1|GNAI2|PARK7|GNAI3|SLC25A6|YAP1|CTNNB1|ENO1
GO Biological Process	Negative regulation of biological process	1.35e-06	3031	1.65e-08	0.586967	GO:0048519	5313	206	RANBP9|YTHDC2|PSMD10|CSK|AIMP2|SERPINE1|PLCG1|TRAP1|TSG101|CNN1|HIP1R|LGALS3|NOTCH2|ITGAV|PSMC1|IPO5|TAOK1|ANKRD13A|AARS1|PDGFRB|SMURF2|SLC12A2|AJUBA|PACSIN2|SLC9A1|CBL|TUBB4A|CUL3|RAPGEF2|PDCD6|RAB7A|NRP1|PRKAR2A|SRI|IQGAP1|CDH2|PFKL|RASA1|EGFR|NONO|USP15|ANK3|SH3RF1|FLCN|AKR1B1|GNAQ|NRG1|IGF2BP1|CSTB|BAX|ITGA5|ANXA5|INPPL1|ARF6|COPS2|STAT6|CRK|AXL|DIP2B|MAP2K1|BCR|CTNNA1|YWHAG|MMP14|ARHGAP1|PCD…
GO Biological Process	Negative regulation of catalytic activity	0.00037	3031	8.03e-06	0.34318	GO:0043086	771	44	CSK|SERPINE1|TSG101|LGALS3|IPO5|AJUBA|PPP1R12C|CBL|PRKAR2A|IQGAP1|SH3RF1|FLCN|GNAQ|CSTB|ANXA5|YWHAG|GNAI2|PAK2|NQO1|EIF4A2|PARK7|RAP1GDS1|CTSB|ANXA2|ATP2B4|GMFB|TIPRL|GNAI3|AMOT|PIP4K2A|PICALM|ANXA4|EPHB2|SH3BP4|PPP1R12A|CORO1C|SERPINH1|CAND1|BCAS3|PPP1R9B|SERPINB6|RPS7|RPL11|RDX
GO Biological Process	Negative regulation of cell adhesion	0.0375	3031	0.0016	0.142597	GO:0007162	289	18	SERPINE1|LGALS3|RASA1|MMP14|PTK2|MAP4K4|DLG1|SCRIB|PLXNB2|DLG5|PLXNA1|EPHB2|CORO1C|RHOA|PHLDB2|BCAS3|CASK|RDX
GO Biological Process	Negative regulation of cell communication	1.36e-05	3031	2.11e-07	0.486646	GO:0010648	1348	71	RANBP9|PSMD10|CSK|SERPINE1|TRAP1|TSG101|LGALS3|ITGAV|SMURF2|AJUBA|CBL|CUL3|PDCD6|RAB7A|NRP1|CDH2|PFKL|RASA1|EGFR|NONO|SH3RF1|FLCN|NRG1|BAX|INPPL1|CTNNA1|MMP14|GNAI2|ITGA3|CPNE1|MET|PPP2R1A|HGS|RASA3|EZR|PARK7|DLG1|ARHGAP12|ATP2B4|EPHA2|CASP8|RAP1A|TPBG|GNAI3|DLG5|STK4|STXBP1|NIBAN2|PHACTR4|BICC1|PIP4K2A|OPTN|IL6ST|SLC25A6|DNM2|ITGB1|CTNND1|EPHB2|SH3BP4|NFATC4|RHOA|PARP14|ERBIN|PBK|DAG1|SIRPA|YAP1…
GO Biological Process	Negative regulation of cell death	1.7e-05	3031	2.66e-07	0.476955	GO:0060548	1016	58	PSMD10|SERPINE1|TRAP1|HIP1R|LGALS3|NOTCH2|ITGAV|PSMC1|AARS1|PDGFRB|SLC9A1|CBL|NRP1|RASA1|EGFR|NONO|SH3RF1|AKR1B1|NRG1|BAX|ITGA5|ANXA5|AXL|CTNNA1|PCDHGC3|GNAI2|PAK2|MET|FMN2|NQO1|PARK7|PTK2|FERMT2|MAP4K4|RPS3A|FYN|COPS5|ANKLE2|CASP8|KIF14|GNAI3|ADPRHL2|STXBP1|NIBAN2|IL6ST|SLC25A6|ANXA4|ASNS|ITGB1|NFATC4|RHOA|SHC1|RPL10|CDK5|CFL1|YAP1|CTNNB1|ENO1
GO Biological Process	Negative regulation of cell migration	0.0077	3031	0.00025	0.211351	GO:0030336	288	20	SERPINE1|FLCN|NRG1|BCR|RAP2B|PLCB1|DPYSL3|SRGAP1|ATP2B4|TPM1|AFDN|DLG5|CLIC4|CORO1C|RHOA|PHLDB2|PTPRK|DAG1|CNN2|SRGAP2C
GO Biological Process	Negative regulation of cell motility	0.0025	3031	7.06e-05	0.260206	GO:2000146	304	22	SERPINE1|FLCN|NRG1|CRK|BCR|CTNNA1|RAP2B|PLCB1|DPYSL3|SRGAP1|ATP2B4|TPM1|AFDN|DLG5|CLIC4|CORO1C|RHOA|PHLDB2|PTPRK|DAG1|CNN2|SRGAP2C
GO Biological Process	Negative regulation of cell projection organization	0.0046	3031	0.00014	0.233724	GO:0031345	190	16	RAPGEF2|NRP1|ARF6|DIP2B|ITGA3|DPYSL3|FYN|GDI2|DNM2|EPHB2|NFATC4|GDI1|RHOA|CDK5|SRGAP2C|YAP1
GO Biological Process	Negative regulation of cell-matrix adhesion	0.00078	3031	1.85e-05	0.310791	GO:0001953	36	8	SERPINE1|RASA1|MMP14|MAP4K4|CORO1C|PHLDB2|BCAS3|CASK
GO Biological Process	Negative regulation of cell-substrate adhesion	0.0031	3031	8.75e-05	0.250864	GO:0010812	60	9	SERPINE1|RASA1|MMP14|MAP4K4|CORO1C|RHOA|PHLDB2|BCAS3|CASK
GO Biological Process	Negative regulation of cellular component organization	2.69e-06	3031	3.51e-08	0.557025	GO:0051129	691	47	PSMD10|HIP1R|LGALS3|ITGAV|TAOK1|ANKRD13A|PACSIN2|TUBB4A|RAPGEF2|RAB7A|NRP1|FLCN|ARF6|DIP2B|MMP14|PAK2|ITGA3|MET|PARK7|DPYSL3|ANXA2|FYN|GMFB|KIF14|STXBP1|MAPRE1|GDI2|SLC25A6|DNM2|XRCC5|PICALM|ARAP1|PFDN6|EPHB2|NFATC4|GDI1|CORO1C|RHOA|PHLDB2|CDK5|BCAS3|SRGAP2C|YAP1|WASF2|EPS8|RDX|CDC42
GO Biological Process	Negative regulation of cellular process	9.97e-06	3031	1.48e-07	0.50013	GO:0048523	4736	184	RANBP9|YTHDC2|PSMD10|CSK|AIMP2|SERPINE1|TRAP1|TSG101|CNN1|HIP1R|LGALS3|NOTCH2|ITGAV|PSMC1|IPO5|TAOK1|ANKRD13A|AARS1|PDGFRB|SMURF2|AJUBA|PACSIN2|SLC9A1|CBL|TUBB4A|CUL3|RAPGEF2|PDCD6|RAB7A|NRP1|PRKAR2A|SRI|IQGAP1|CDH2|PFKL|RASA1|EGFR|NONO|ANK3|SH3RF1|FLCN|AKR1B1|GNAQ|NRG1|IGF2BP1|BAX|ITGA5|ANXA5|INPPL1|ARF6|COPS2|STAT6|CRK|AXL|DIP2B|MAP2K1|BCR|CTNNA1|YWHAG|MMP14|ARHGAP1|PCDHGC3|GNAI2|PAK2|ITGA3|CPN…
GO Biological Process	Negative regulation of endocytosis	0.0204	3031	0.00077	0.169037	GO:0045806	50	7	LGALS3|ITGAV|ANKRD13A|PACSIN2|ARF6|ANXA2|PICALM
GO Biological Process	Negative regulation of extrinsic apoptotic signaling pathway	0.0459	3031	0.0021	0.133819	GO:2001237	97	9	SERPINE1|LGALS3|ITGAV|NRP1|SH3RF1|NRG1|CTNNA1|PARK7|YAP1
GO Biological Process	Negative regulation of focal adhesion assembly	0.0454	3031	0.0021	0.134294	GO:0051895	17	4	MMP14|CORO1C|PHLDB2|BCAS3
GO Biological Process	Negative regulation of hydrogen peroxide-mediated programmed cell death	0.0337	3031	0.0014	0.147237	GO:1901299	6	3	TRAP1|MET|PARK7
GO Biological Process	Negative regulation of intracellular signal transduction	0.00029	3031	6.21e-06	0.35376	GO:1902532	519	34	RANBP9|PSMD10|CSK|TRAP1|AJUBA|CUL3|PDCD6|RASA1|NONO|FLCN|ITGA3|CPNE1|MET|PPP2R1A|RASA3|EZR|PARK7|DLG1|ARHGAP12|ATP2B4|EPHA2|CASP8|DLG5|OPTN|ITGB1|EPHB2|SH3BP4|RHOA|ERBIN|PBK|DAG1|SIRPA|ENO1|ARHGAP35
GO Biological Process	Negative regulation of locomotion	0.0042	3031	0.00013	0.237675	GO:0040013	340	23	SERPINE1|NRP1|FLCN|NRG1|CRK|BCR|CTNNA1|RAP2B|PLCB1|DPYSL3|SRGAP1|ATP2B4|TPM1|AFDN|DLG5|CLIC4|CORO1C|RHOA|PHLDB2|PTPRK|DAG1|CNN2|SRGAP2C
Reactome Pathways	Negative regulation of MAPK pathway	0.0498	3031	0.0088	0.130277	HSA-5675221	43	5	MAP2K2|MAP2K1|PPP2R1A|NRAS|PPP2R5D
GO Biological Process	Negative regulation of molecular function	0.00022	3031	4.51e-06	0.365758	GO:0044092	1143	59	PSMD10|CSK|SERPINE1|TSG101|LGALS3|ITGAV|IPO5|AJUBA|PPP1R12C|CBL|PRKAR2A|SRI|IQGAP1|RALB|ANK3|SH3RF1|FLCN|GNAQ|CSTB|BAX|ANXA5|YWHAG|GNAI2|PAK2|CPNE1|MET|NQO1|EIF4A2|PARK7|RAP1GDS1|CTSB|ANXA2|ATP2B4|GMFB|PTPRF|TIPRL|GNAI3|CHUK|AMOT|PIP4K2A|PICALM|ANXA4|PPP3CB|EPHB2|SH3BP4|NFATC4|PPP1R12A|CORO1C|ERBIN|SERPINH1|PARP10|CAND1|BCAS3|PPP1R9B|SERPINB6|RPS7|RPL11|RDX|EIF4A3
GO Biological Process	Negative regulation of neuron apoptotic process	0.0146	3031	0.00053	0.183565	GO:0043524	153	13	AARS1|NRP1|RASA1|NONO|BAX|AXL|PCDHGC3|PARK7|KIF14|STXBP1|IL6ST|NFATC4|RHOA
GO Biological Process	Negative regulation of neuron death	0.0067	3031	0.00021	0.217393	GO:1901215	219	17	PSMC1|AARS1|CBL|NRP1|RASA1|NONO|BAX|AXL|PCDHGC3|PARK7|KIF14|STXBP1|IL6ST|NFATC4|RHOA|CDK5|CTNNB1
Reactome Pathways	Negative regulation of NOTCH4 signaling	0.009	3031	0.0011	0.204576	HSA-9604323	53	7	PSMC4|PSMD10|PSMA2|PSMC1|PSMD11|PSMD12|PSME1
GO Biological Process	Negative regulation of phosphate metabolic process	0.0014	3031	3.58e-05	0.285387	GO:0045936	424	28	CSK|TSG101|LGALS3|IPO5|AJUBA|CBL|PRKAR2A|IQGAP1|FLCN|GNAQ|BAX|YWHAG|GNAI2|PAK2|PPP2R1A|PARK7|ANKLE2|KIRREL1|NIBAN1|TIPRL|PARD3|PIP4K2A|EPHB2|CORO1C|PARP14|PBK|SIRPA|PPP1R9B
GO Biological Process	Negative regulation of phosphorylation	0.0108	3031	0.00037	0.196658	GO:0042326	368	23	CSK|TSG101|IPO5|AJUBA|CBL|PRKAR2A|FLCN|GNAQ|BAX|YWHAG|PAK2|PPP2R1A|PARK7|ANKLE2|KIRREL1|NIBAN1|PARD3|PIP4K2A|EPHB2|CORO1C|PARP14|PBK|SIRPA
GO Biological Process	Negative regulation of programmed cell death	1.5e-05	3031	2.34e-07	0.482391	GO:0043069	911	54	PSMD10|SERPINE1|TRAP1|HIP1R|LGALS3|NOTCH2|ITGAV|AARS1|PDGFRB|SLC9A1|CBL|NRP1|RASA1|EGFR|NONO|SH3RF1|AKR1B1|NRG1|BAX|ITGA5|ANXA5|AXL|CTNNA1|PCDHGC3|GNAI2|PAK2|MET|FMN2|NQO1|PARK7|PTK2|MAP4K4|RPS3A|COPS5|ANKLE2|CASP8|KIF14|GNAI3|ADPRHL2|STXBP1|NIBAN2|IL6ST|SLC25A6|ANXA4|ASNS|ITGB1|NFATC4|RHOA|SHC1|RPL10|CFL1|YAP1|CTNNB1|ENO1
GO Biological Process	Negative regulation of protein catabolic process	0.0375	3031	0.0016	0.142597	GO:0042177	112	10	EGFR|NRG1|FMN2|NQO1|PARK7|ANXA2|FYN|GIPC1|PBK|RPL11
GO Biological Process	Negative regulation of protein metabolic process	0.0124	3031	0.00043	0.190658	GO:0051248	1038	48	SERPINE1|TSG101|LGALS3|ITGAV|IPO5|CBL|PRKAR2A|EGFR|SH3RF1|FLCN|GNAQ|NRG1|IGF2BP1|CSTB|BAX|YWHAG|GNAI2|PAK2|FMN2|NQO1|PPP2R1A|PRMT3|PARK7|CTSB|ANXA2|FYN|ATP2B4|KIRREL1|NIBAN1|TIPRL|PARD3|GIPC1|PICALM|PFDN6|EPHB2|CORO1C|PARP14|CDK5|PBK|SERPINH1|PARP10|SIRPA|PPP1R9B|SERPINB6|RPS7|CTNNB1|RPL11|EIF4A3
GO Biological Process	Negative regulation of protein modification process	0.002	3031	5.28e-05	0.269897	GO:0031400	506	31	TSG101|LGALS3|IPO5|CBL|PRKAR2A|FLCN|GNAQ|BAX|YWHAG|GNAI2|PAK2|PPP2R1A|PRMT3|PARK7|FYN|ATP2B4|KIRREL1|NIBAN1|TIPRL|PARD3|EPHB2|CORO1C|PARP14|CDK5|PBK|PARP10|SIRPA|PPP1R9B|RPS7|CTNNB1|RPL11
GO Biological Process	Negative regulation of Ras protein signal transduction	0.0013	3031	3.23e-05	0.288606	GO:0046580	52	9	CUL3|RASA1|FLCN|ITGA3|MET|RASA3|ITGB1|EPHB2|ARHGAP35
GO Biological Process	Negative regulation of reactive oxygen species biosynthetic process	0.0454	3031	0.0021	0.134294	GO:1903427	17	4	TRAP1|PARK7|FYN|RHOA
WikiPathways	Hepatocyte growth factor receptor signaling	6.6e-05	3031	1.61e-06	0.418046	WP313	34	9	MAP2K2|PXN|RASA1|CRK|MAP2K1|MET|PTK2|RAP1A|ITGB1
GO Biological Process	Negative regulation of response to stimulus	1.14e-05	3031	1.74e-07	0.49431	GO:0048585	1612	81	RANBP9|PSMD10|CSK|SERPINE1|PLCG1|TRAP1|TSG101|LGALS3|ITGAV|SMURF2|SLC12A2|AJUBA|CBL|CUL3|PDCD6|RAB7A|NRP1|CDH2|RASA1|EGFR|NONO|USP15|SH3RF1|FLCN|NRG1|BAX|INPPL1|STAT6|CRK|BCR|CTNNA1|MMP14|GNAI2|ITGA3|CPNE1|MET|PPP2R1A|HGS|RASA3|EZR|PARK7|DLG1|ARHGAP12|ANXA2|FYN|ATP2B4|EPHA2|CASP8|PCBP2|TPBG|GNAI3|DLG5|STK4|NIBAN2|PHACTR4|BICC1|PIP4K2A|OPTN|IL6ST|SLC25A6|DNM2|PPP3CB|ITGB1|CTNND1|EPHB2|SH3BP4|NFATC…
GO Biological Process	Negative regulation of Rho protein signal transduction	0.0041	3031	0.00012	0.238722	GO:0035024	24	6	CUL3|FLCN|ITGA3|MET|ITGB1|ARHGAP35
GO Biological Process	Negative regulation of signal transduction	9.13e-06	3031	1.34e-07	0.503953	GO:0009968	1252	68	RANBP9|PSMD10|CSK|SERPINE1|TRAP1|TSG101|LGALS3|ITGAV|SMURF2|AJUBA|CBL|CUL3|PDCD6|RAB7A|NRP1|CDH2|RASA1|EGFR|NONO|SH3RF1|FLCN|NRG1|BAX|INPPL1|CTNNA1|MMP14|GNAI2|ITGA3|CPNE1|MET|PPP2R1A|HGS|RASA3|EZR|PARK7|DLG1|ARHGAP12|ATP2B4|EPHA2|CASP8|TPBG|GNAI3|DLG5|STK4|NIBAN2|PHACTR4|BICC1|PIP4K2A|OPTN|IL6ST|SLC25A6|DNM2|ITGB1|CTNND1|EPHB2|SH3BP4|NFATC4|RHOA|PARP14|ERBIN|PBK|DAG1|SIRPA|YAP1|CTNNB1|ENO1|EIF4A…
GO Biological Process	Negative regulation of signaling	8.23e-06	3031	1.21e-07	0.50846	GO:0023057	1354	72	RANBP9|PSMD10|CSK|SERPINE1|TRAP1|TSG101|LGALS3|ITGAV|SMURF2|AJUBA|CBL|CUL3|PDCD6|RAB7A|NRP1|CDH2|PFKL|RASA1|EGFR|NONO|SH3RF1|FLCN|NRG1|BAX|INPPL1|CTNNA1|MMP14|GNAI2|ITGA3|CPNE1|MET|PPP2R1A|HGS|RASA3|EZR|PARK7|DLG1|ARHGAP12|ATP2B4|EPHA2|CASP8|RAP1A|TPBG|GNAI3|DLG5|STK4|STXBP1|NIBAN2|PHACTR4|BICC1|PIP4K2A|OPTN|IL6ST|SLC25A6|DNM2|PPP3CB|ITGB1|CTNND1|EPHB2|SH3BP4|NFATC4|RHOA|PARP14|ERBIN|PBK|DAG1|SIR…
GO Biological Process	Negative regulation of small GTPase mediated signal transduction	0.00068	3031	1.59e-05	0.316749	GO:0051058	60	10	CUL3|RASA1|FLCN|ITGA3|MET|RASA3|ARHGAP12|ITGB1|EPHB2|ARHGAP35
GO Biological Process	Negative regulation of stress fiber assembly	0.0435	3031	0.0019	0.136151	GO:0051497	29	5	PAK2|MET|ARAP1|PHLDB2|WASF2
GO Biological Process	Negative regulation of supramolecular fiber organization	0.0244	3031	0.00096	0.161261	GO:1902904	164	13	HIP1R|TAOK1|TUBB4A|PAK2|MET|GMFB|MAPRE1|ARAP1|PFDN6|PHLDB2|WASF2|EPS8|RDX
GO Biological Process	Negative regulation of transport	0.0039	3031	0.00012	0.240894	GO:0051051	432	27	CSK|LGALS3|ITGAV|ANKRD13A|PACSIN2|RAB7A|SRI|PFKL|ANK3|NRG1|ARF6|BCR|ARHGAP1|GNAI2|ACSL4|PARK7|ANXA2|RAP1A|STXBP3|PICALM|PPP3CB|EPHB2|GDI1|CDK5|CNN2|SIRPA|CYFIP1
Reactome Pathways	Nephrin family interactions	0.034	3031	0.0054	0.146852	HSA-373753	23	4	IQGAP1|FYN|KIRREL1|CASK
GO Biological Process	Nephron development	0.0406	3031	0.0018	0.139147	GO:0072006	134	11	ACTA2|NOTCH2|PDGFRB|ACAT1|IQGAP1|MYO1E|ITGA3|BASP1|DLG1|ILK|CTNNB1
TISSUES	Nervous system	2.88e-43	3031	1.42e-45	4.25406	BTO:0001484	6016	327	ARF5|RANBP9|MRI1|EFNB1|SNAP29|TAB1|PYGB|TPD52L2|AHCY|PSMD10|CSK|TBC1D17|PSMA2|YKT6|ACTA2|RPL19|GALK1|SLC25A11|LRRC59|ARPC3|RAB35|EXOC2|SNX17|SLC1A4|PLCG1|VASP|TRAP1|CANX|PMPCB|NECTIN2|HIP1R|GRWD1|EXOC4|WDR44|LGALS3|PI4KA|NOTCH2|ARF3|PRPH|CCT7|TBRG4|PSMC1|IPO5|MPP5|TAOK1|PDGFRB|HACD3|SNX1|COTL1|RAB2A|ACTR3|PACSIN2|EHD2|NAPA|EHBP1|ARCN1|FARP2|TUBB4A|CUL3|RAB10|PDCD6|RAB7A|PRKAR2A|SRI|PXN|CDH11|CDH2…
GO Biological Process	Nervous system development	1.42e-12	3031	4.71e-15	1.18477	GO:0007399	2188	125	RALA|DVL2|EFNB1|CSK|RAB35|VASP|NUMBL|RRAS2|NOTCH2|MPP5|TAOK1|AARS1|NAPA|ARCN1|FARP2|RAPGEF2|RAB10|NRP1|ACAT1|IQGAP1|CDH11|CDH2|SCYL1|EGFR|VPS51|ANK3|SH3RF1|NRG1|IGF2BP1|BAX|ABI2|ARF6|HPRT1|COPS2|CRK|AXL|DIP2B|MAP2K1|BCR|CTNNA1|MMP14|PCDHGC3|CSPG4|PAK2|ITGA3|CPNE1|MET|BASP1|UGDH|TUBB3|LLGL1|ENO3|PRMT3|NEXN|PLS1|PLCB1|SRR|ACSL4|PTK2|MAP4K4|DPYSL3|FYN|MINK1|SCRIB|ATP2B4|ANKLE2|GMFB|EPHB4|EPHA2|MYPN|…
Reactome Pathways	Nervous system development	2.58e-29	3031	3.39e-32	2.85884	HSA-9675108	575	82	RANBP9|PSMC4|EFNB1|PSMD10|PSMA2|RPL19|ARPC3|DOK1|PLCG1|VASP|ITGAV|PSMC1|PSMD11|MAP2K2|ACTR3|FARP2|TUBB4A|NRP1|PRKAR2A|RASA1|EGFR|ANK3|ITGA5|ITGA2|MAP2K1|PAK2|MET|RPS15A|TUBB6|TUBB3|AP2A2|EZR|PTK2|TUBB4B|RPS2|DPYSL3|DLG1|RPLP1|RPS3A|FYN|SRGAP1|PDLIM7|PSMD12|EPHB4|EPHA2|AP2A1|MSN|UTRN|NRAS|PSME1|DNM2|PLXNA1|RPL34|PPP3CB|ITGB1|EPHB2|ARPC1B|GSPT1|RHOA|SHC1|RPL6|RPL10|CUL2|CDK5|MYO10|CFL1|RPS13|DAG1|T…
DISEASES	Nervous system disease	4.32e-05	3031	9.39e-09	0.436452	DOID:863	2275	109	SNAP29|RP2|AIMP2|ACTA2|GALK1|SLC25A11|EXOC2|SLC1A4|PMPCB|PI4KA|PRPH|AARS1|SLC12A2|SLC9A1|ARCN1|FARP2|TUBB4A|CUL3|RAPGEF2|RAB10|RAB7A|NRP1|PIK3C2A|IDE|SCYL1|RASA1|EGFR|CCT5|USP15|QDPR|RPIA|AKR1B1|GNAQ|CSTB|ERAP1|STAT6|CTNNA1|YWHAG|DNMBP|MET|VPS37A|UGDH|TUBB3|BGN|EXOC7|RASA3|PLS1|PLCB1|PARK7|TUBB4B|FERMT2|CTSB|ATG7|FILIP1L|MINK1|ANKLE2|EPHA2|MPZL1|LONP1|KIF14|NRAS|RARS2|ADPRHL2|STXBP1|YARS1|FGD1|AC…
Reactome Pathways	Netrin-1 signaling	0.0248	3031	0.0037	0.160555	HSA-373752	50	6	PLCG1|EZR|PTK2|FYN|MYO10|CDC42
WikiPathways	Netrin-UNC5B signaling pathway	0.0376	3031	0.0044	0.142481	WP4747	52	6	MAP2K2|MAP2K1|PTK2|FYN|RHOA|YAP1
GO Biological Process	Neural crest cell differentiation	0.0398	3031	0.0017	0.140012	GO:0014033	94	9	EFNB1|PDCD6|NRP1|CDH2|NRG1|PHACTR4|CORO1C|RPS7|CDC42
WikiPathways	Neural crest cell migration during development	0.0468	3031	0.0061	0.132975	WP4564	39	5	CDH11|PAK2|EPHB4|EPHB2|RHOA
GO Biological Process	Neural precursor cell proliferation	0.0487	3031	0.0023	0.131247	GO:0061351	98	9	NUMBL|RAB10|IGF2BP1|CTNNA1|PLXNB2|KIF14|ITGB1|ILK|CTNNB1
GO Biological Process	Neural tube closure	0.038	3031	0.0016	0.142022	GO:0001843	93	9	RALA|DVL2|VASP|SCRIB|PLXNB2|PHACTR4|RPS7|MTHFD1|ARHGAP35
GO Biological Process	Neural tube formation	0.0288	3031	0.0012	0.154061	GO:0001841	107	10	RALA|DVL2|VASP|SCRIB|PLXNB2|STK4|PHACTR4|RPS7|MTHFD1|ARHGAP35
UniProt Keywords	Neurodegeneration	0.0026	3031	0.00018	0.258503	KW-0523	349	23	PMPCB|AARS1|SLC9A1|RAB10|RAB7A|SCYL1|VPS37A|PARK7|NHLRC2|RARS2|ADPRHL2|YARS1|OPTN|SBF1|DNM2|GARS1|REPS1|ANXA11|CDK5|ATP1A1|COASY|UBAP1|AMPD2
Monarch Phenotype	Neurodevelopmental abnormality	4.11e-06	3031	2.02e-09	0.538616	HP:0012759	2323	113	EFNB1|SNAP29|AHCY|RP2|AIMP2|GALK1|SLC1A4|PMPCB|PI4KA|RRAS2|MPP5|TAOK1|AARS1|SLC12A2|MAP2K2|SLC9A1|ARCN1|CBL|TUBB4A|TNPO3|ACAT1|PIK3C2A|CDH11|CDH2|SCYL1|NONO|VPS51|ANK3|QDPR|RPIA|GNAQ|CSTB|DNAAF5|HPRT1|DIP2B|MAP2K1|YWHAG|SEC23A|MMP14|VPS37A|RPS15A|FMN2|UGDH|MPDZ|TUBB3|TUFM|PPP2R1A|FTSJ1|RAB11B|EXOC7|EPB41L1|PLCB1|EZR|ACSL4|PSMD12|AP1B1|ANKLE2|GMPPA|MYPN|LONP1|CYB5R3|KIF14|NHLRC2|MAP3K7|NRAS|RARS2|…
Monarch Phenotype	Neurodevelopmental delay	5.47e-06	3031	3.59e-09	0.526201	HP:0012758	1926	98	EFNB1|SNAP29|AHCY|AIMP2|GALK1|SLC1A4|PMPCB|PI4KA|RRAS2|MPP5|AARS1|SLC12A2|MAP2K2|SLC9A1|ARCN1|CBL|TUBB4A|TNPO3|ACAT1|PIK3C2A|CDH11|CDH2|SCYL1|NONO|VPS51|ANK3|QDPR|RPIA|DNAAF5|HPRT1|MAP2K1|YWHAG|SEC23A|VPS37A|RPS15A|FMN2|UGDH|MPDZ|TUBB3|PPP2R1A|FTSJ1|RAB11B|EXOC7|EZR|ACSL4|PSMD12|AP1B1|ANKLE2|GMPPA|MYPN|LONP1|CYB5R3|KIF14|NHLRC2|NRAS|RARS2|GNAI3|NSDHL|DPM1|STXBP1|FGD1|ITPA|IL6ST|DNM2|GARS1|WASF1|A…
GO Biological Process	Neurogenesis	3.66e-12	3031	1.35e-14	1.14365	GO:0022008	1290	88	EFNB1|CSK|RAB35|VASP|NUMBL|RRAS2|NOTCH2|MPP5|TAOK1|NAPA|FARP2|RAPGEF2|RAB10|NRP1|IQGAP1|CDH11|CDH2|SCYL1|ANK3|SH3RF1|NRG1|IGF2BP1|BAX|HPRT1|COPS2|CRK|AXL|MAP2K1|CTNNA1|MMP14|CSPG4|PAK2|ITGA3|CPNE1|MET|UGDH|TUBB3|LLGL1|PRMT3|NEXN|PLS1|ACSL4|PTK2|MAP4K4|DPYSL3|FYN|MINK1|SCRIB|EPHB4|EPHA2|MYPN|PLXNB2|PTPRF|NCKAP1|RAB13|TPBG|STXBP1|NIBAN2|PARD3|ABI1|DNM2|XRCC5|WASF1|PICALM|PLXNA1|FAT4|PPP3CB|ITGB1|IL…
Monarch Phenotype	Neurological speech impairment	0.0063	3031	8.09e-05	0.220066	HP:0002167	1354	62	AIMP2|SLC25A11|SLC1A4|PMPCB|PI4KA|RRAS2|MPP5|TAOK1|AARS1|SLC12A2|MAP2K2|SLC9A1|CBL|TUBB4A|PIK3C2A|SCYL1|NONO|ANK3|RPIA|GNAQ|CSTB|DNAAF5|HPRT1|MAP2K1|YWHAG|SEC23A|VPS37A|FMN2|TUBB3|PPP2R1A|FTSJ1|RAB11B|EPB41L1|EZR|ACSL4|PSMD12|GMPPA|KIF14|NRAS|RARS2|NSDHL|ADPRHL2|STXBP1|OPTN|WASF1|GIPC1|TPRN|TKT|GDI1|DDOST|RPL10|EIF2B1|SLC2A1|PPP2R5D|TENM3|DAG1|ACTG1|COASY|ADSL|CASK|CTNNB1|CDC42
COMPARTMENTS	Neuromuscular junction	0.0135	3031	0.00071	0.186967	GOCC:0031594	35	6	ANK3|DLG1|UTRN|ITGB1|CDK5|FARP1
GO Biological Process	Neuron development	3.36e-12	3031	1.22e-14	1.14737	GO:0048666	840	68	EFNB1|RAB35|VASP|NUMBL|NOTCH2|MPP5|TAOK1|FARP2|RAPGEF2|RAB10|NRP1|IQGAP1|CDH11|SCYL1|ANK3|IGF2BP1|HPRT1|CRK|CTNNA1|PAK2|CPNE1|UGDH|TUBB3|LLGL1|PRMT3|NEXN|PLS1|PTK2|MAP4K4|DPYSL3|FYN|MINK1|SCRIB|EPHB4|EPHA2|MYPN|PLXNB2|PTPRF|NCKAP1|RAB13|TPBG|STXBP1|NIBAN2|PARD3|ABI1|DNM2|WASF1|PICALM|PLXNA1|PPP3CB|ITGB1|EPHB2|TPRN|NFATC4|SLC4A7|RHOA|CDK5|TENM3|DAG1|PPP1R9B|EHD1|CYFIP1|FARP1|PHGDH|DOCK10|CTNNB1|CD…
GO Biological Process	Neuron differentiation	1.6e-10	3031	8.88e-13	0.979588	GO:0030182	1062	74	EFNB1|RAB35|VASP|NUMBL|NOTCH2|MPP5|TAOK1|NAPA|FARP2|RAPGEF2|RAB10|NRP1|IQGAP1|CDH11|SCYL1|ANK3|NRG1|IGF2BP1|HPRT1|COPS2|CRK|MAP2K1|CTNNA1|PAK2|CPNE1|MET|UGDH|TUBB3|LLGL1|PRMT3|NEXN|PLS1|ACSL4|PTK2|MAP4K4|DPYSL3|FYN|MINK1|SCRIB|EPHB4|EPHA2|MYPN|PLXNB2|PTPRF|NCKAP1|RAB13|TPBG|STXBP1|NIBAN2|PARD3|ABI1|DNM2|WASF1|PICALM|PLXNA1|PPP3CB|ITGB1|EPHB2|TPRN|NFATC4|SLC4A7|RHOA|CDK5|TENM3|DAG1|PPP1R9B|EHD1|CY…
GO Biological Process	Neuron migration	0.0067	3031	0.00021	0.217393	GO:0001764	138	13	RAPGEF2|NRP1|SH3RF1|NRG1|BAX|CRK|AXL|ITGA3|FYN|PLXNA1|RHOA|CDK5|CTNNB1
COMPARTMENTS	Neuron projection	0.0012	3031	5.15e-05	0.292082	GOCC:0043005	579	34	EXOC4|SLC12A2|RAPGEF2|IQGAP1|ANK3|IGF2BP1|ABI2|DIP2B|ACAD9|BASP1|MPDZ|TUBB3|PPP2R1A|PLS1|DPYSL3|RAB13|PARD3|FSCN1|GARS1|GIPC1|EPHB2|TPRN|RHOA|GPHN|CDK5|CFL1|SIPA1L1|PPP1R9B|SEPTIN2|CYFIP1|FARP1|DOCK10|EPS8|CDC42
GO Cellular Component	Neuron projection	2.42e-15	3031	4.25e-17	1.46162	GO:0043005	1391	98	AHCY|YKT6|SLC1A4|CANX|SNAP23|HIP1R|EXOC4|PRPH|MPP5|SLC12A2|CBL|TUBB4A|RAPGEF2|NRP1|IQGAP1|CDH2|ARL8A|ANK3|GNAQ|ZDHHC5|NRG1|IGF2BP1|ABI2|ITGA2|DIP2B|BCR|ABR|ACAD9|GNAI2|ITGA3|BASP1|NQO1|MPDZ|TUBB3|LLGL1|PPP2R1A|NEXN|EXOC7|PLS1|PARK7|PTK2|SEPTIN6|DPYSL3|DLG1|FYN|MINK1|ATP2B4|EPHB4|EPHA2|CASP8|MYPN|KIRREL1|PTPRF|COMT|RAB13|GLRX3|MPP1|RAP1A|TPBG|NCS1|STXBP1|PARD3|ABI1|PIP4K2A|SEPTIN8|IL6ST|FSCN1|DNM2…
GO Biological Process	Neuron projection development	1.03e-12	3031	3.29e-15	1.19872	GO:0031175	674	61	EFNB1|RAB35|VASP|NUMBL|NOTCH2|TAOK1|RAPGEF2|RAB10|NRP1|IQGAP1|CDH11|ANK3|IGF2BP1|HPRT1|CRK|CTNNA1|PAK2|CPNE1|TUBB3|LLGL1|PRMT3|NEXN|PLS1|PTK2|MAP4K4|FYN|MINK1|SCRIB|EPHB4|EPHA2|MYPN|PLXNB2|PTPRF|NCKAP1|RAB13|TPBG|STXBP1|NIBAN2|PARD3|ABI1|DNM2|WASF1|PICALM|PLXNA1|PPP3CB|ITGB1|EPHB2|TPRN|NFATC4|RHOA|CDK5|DAG1|PPP1R9B|EHD1|CYFIP1|FARP1|PHGDH|DOCK10|CTNNB1|CDC42|ARHGAP35
GO Biological Process	Neuron projection extension	0.0037	3031	0.00011	0.24318	GO:1990138	77	10	NRP1|IQGAP1|CPNE1|WASF1|PLXNA1|PPP3CB|ITGB1|CDK5|CYFIP1|CTNNB1
GO Biological Process	Neuron projection morphogenesis	2.32e-11	3031	1.02e-13	1.06345	GO:0048812	477	48	EFNB1|VASP|NUMBL|NOTCH2|TAOK1|RAB10|NRP1|IQGAP1|CDH11|ANK3|IGF2BP1|HPRT1|CPNE1|TUBB3|LLGL1|PRMT3|NEXN|PTK2|MAP4K4|FYN|MINK1|EPHB4|EPHA2|MYPN|PLXNB2|NCKAP1|TPBG|STXBP1|NIBAN2|PARD3|ABI1|DNM2|WASF1|PICALM|PLXNA1|PPP3CB|ITGB1|EPHB2|NFATC4|RHOA|CDK5|DAG1|CYFIP1|FARP1|DOCK10|CTNNB1|CDC42|ARHGAP35
GO Biological Process	Neuron projection organization	0.0113	3031	0.00039	0.194692	GO:0106027	44	7	ITGA3|PRMT3|PLS1|FYN|EPHB2|DOCK10|CDC42
GO Cellular Component	Neuronal cell body	0.0063	3031	0.00051	0.220066	GO:0043025	502	28	YKT6|SLC1A4|CANX|HIP1R|PRPH|MPP5|SLC12A2|TUBB4A|RAPGEF2|IGF2BP1|DIP2B|NQO1|TUBB3|PPP2R1A|SRR|PTPRF|IL6ST|PICALM|EPHB2|AKAP12|ATP2B1|GDI1|CDK5|MYO10|PPP1R9B|CYFIP1|EIF4A3|CDC42
Reactome Pathways	Neuronal System	0.0113	3031	0.0014	0.194692	HSA-112316	409	23	TUBB4A|PRKAR2A|NRG1|GNAI2|TUBB6|TUBB3|AP2A2|EPB41L1|PLCB1|TUBB4B|DLG1|AP2A1|PTPRF|COMT|EPB41L2|NRAS|GNAI3|STXBP1|PRKAB1|TUBA1C|PLCB3|SIPA1L1|CASK
UniProt Keywords	Neuropathy	0.0415	3031	0.0041	0.138195	KW-0622	108	9	SNAP29|AARS1|RAB7A|CCT5|YARS1|SBF1|DNM2|GARS1|ATP1A1
Reactome Pathways	Signaling by TGF-beta Receptor Complex	0.012	3031	0.0015	0.192082	HSA-170834	92	9	SERPINE1|ITGAV|SMURF2|CBL|USP15|ITGB5|PARD3|ITGB1|RHOA
GO Biological Process	Neurotransmitter secretion	0.0236	3031	0.00091	0.162709	GO:0007269	85	9	SNAP29|SNAP23|NAPA|SCRIB|RAP1A|STXBP3|STXBP1|CDK5|PIP5K1C
KEGG Pathways	Neurotrophin signaling pathway	0.0029	3031	0.00046	0.25376	hsa04722	112	11	RIPK2|PLCG1|MAP2K2|BAX|CRK|MAP2K1|NRAS|RAP1A|RHOA|SHC1|CDC42
Reactome Pathways	Neutrophil degranulation	1.85e-06	3031	4.87e-08	0.573283	HSA-6798695	476	37	SNAP29|PYGB|PSMA2|ADGRE5|SNAP23|LGALS3|ITGAV|PSMD11|COTL1|RAB10|RAB7A|IQGAP1|PFKL|ARL8A|CSTB|CPNE1|RAP2B|PKM|AP2A2|TUBB4B|CTSB|ANXA2|ATG7|PSMD12|CYB5R3|NRAS|RAP1A|APRT|GDI2|XRCC5|DDOST|RHOA|CAND1|CNN2|SIRPA|CYFIP1|SERPINB6
Reactome Pathways	Nicotinamide salvaging	0.0206	3031	0.003	0.168613	HSA-197264	19	4	NAMPT|PARP14|PARP10|NNMT
Reactome Pathways	NIK-->noncanonical NF-kB signaling	0.0038	3031	0.00036	0.242022	HSA-5676590	58	8	PSMC4|PSMD10|PSMA2|PSMC1|PSMD11|PSMD12|CHUK|PSME1
GO Biological Process	Nitrogen compound metabolic process	0.0361	3031	0.0015	0.144249	GO:0006807	6643	216	MRI1|PSMC4|TAB1|AHCY|CSK|RIPK2|NAMPT|AIMP2|PSMA2|SEC61B|AK1|RPL19|GALK1|DDX39A|CANX|PMPCB|TSG101|NUMBL|GRWD1|LGALS3|CCNB1|TBRG4|PSMC1|PSMD11|TAOK1|AARS1|PDGFRB|HACD3|SMURF2|MAP2K2|CBL|CUL3|RAB7A|NRP1|ACAT1|IDE|VPS37B|PFKL|SCYL1|EGFR|NONO|USP15|QDPR|SH3RF1|AKR1B1|UBE2L6|ZDHHC5|NRG1|MYO1E|ATP5MF|BAX|ABI2|RPN1|ERAP1|HPRT1|COPS2|STAT6|AXL|MAP2K1|BCR|ABR|MMP14|PFAS|PAK2|CPNE1|MET|VPS37A|RPS15A|UGDH|NQ…
GO Biological Process	Nitrogen compound transport	4.58e-11	3031	2.16e-13	1.03391	GO:0071705	1580	97	ARF5|SNAP29|RP2|TBC1D17|CDC37|SNX8|YKT6|SEC61B|RAB35|EXOC2|SNX17|SLC1A4|DDX39A|CANX|PMPCB|SNAP23|TSG101|EXOC4|ARF3|IPO5|SNX1|SLC12A2|RAB2A|NAPA|EHBP1|ARCN1|RAB10|PDCD6|RAB7A|TNPO3|VPS37B|ARL8A|VPS51|ANK3|IGF2BP1|BAX|ARF6|BCR|DDX19A|YWHAG|SEC23A|RAB1B|ARHGAP1|SRP68|TCP1|VPS37A|FMN2|NAPG|COPG1|AP2A2|XPOT|HGS|RAB12|ATP11C|RAB11B|EXOC7|PARK7|SNX18|ATG7|SCRIB|AP1B1|AP2A1|IPO9|VTA1|RAB13|STXBP3|STK4|ST…
WikiPathways	T-cell antigen receptor (TCR) pathway during Staphylococcus aureus infection	0.0016	3031	0.00011	0.279588	WP3863	62	9	PLCG1|MAP2K2|CBL|MAP2K1|DLG1|FYN|MAP3K7|CHUK|DAG1
GO Biological Process	Transforming growth factor beta receptor signaling pathway	0.0438	3031	0.002	0.135853	GO:0007179	96	9	TAB1|PXN|USP15|FLCN|ITGB5|PTK2|FERMT2|MAP3K7|PTPRK
Reactome Pathways	NOD1/2 Signaling Pathway	0.0267	3031	0.004	0.157349	HSA-168638	35	5	TAB1|RIPK2|CASP8|MAP3K7|CHUK
Reactome Pathways	Non-integrin membrane-ECM interactions	0.014	3031	0.0018	0.185387	HSA-3000171	59	7	ITGAV|ITGB5|ITGA2|SDC1|ITGB1|DAG1|CASK
GO Molecular Function	Non-membrane spanning protein tyrosine kinase activity	0.0214	3031	0.00044	0.166959	GO:0004715	45	7	CSK|RIPK2|PTK2|FYN|PEAK1|YES1|JAK1
COMPARTMENTS	Non-membrane-bounded organelle	2.78e-16	3031	3.14e-18	1.5556	GOCC:0043228	3321	175	RANBP9|MRI1|YTHDC2|SNAP29|PSMD10|RP2|RIPK2|PSMA2|AK1|ACTA2|RPL19|LRRC59|ARPC3|SLC1A4|VASP|TSG101|CNN1|GRWD1|CCNB1|PRPH|CCT7|IPO5|AJUBA|MAP2K2|ACTR3|EHBP1|TUBB4A|CUL3|PRKAR2A|SRI|PXN|IQGAP1|CDH2|SCYL1|ARL8A|CCT6A|NONO|CCT5|ANK3|FLCN|MYO1E|IGF2BP1|CSTB|AXL|CTNNA1|MMP14|SRP68|GNAI2|TCP1|VPS37A|RPS15A|TUBB6|FMN2|NUDC|TUBB3|LLGL1|TUFM|PPP2R1A|LASP1|NEXN|EXOC7|PLS1|EPB41L1|BRIX1|EZR|ACSL4|PARK7|PTK2|TU…
KEGG Pathways	Non-small cell lung cancer	0.005	3031	0.00094	0.230103	hsa05223	68	8	PLCG1|MAP2K2|EGFR|BAX|MAP2K1|MET|NRAS|STK4
WikiPathways	Non-small cell lung cancer	0.0135	3031	0.0013	0.186967	WP4255	72	8	PLCG1|MAP2K2|EGFR|BAX|MAP2K1|CASP8|NRAS|STK4
Reactome Pathways	Nonsense Mediated Decay (NMD) enhanced by the Exon Junction Complex (EJC)	2.71e-06	3031	7.72e-08	0.556703	HSA-975957	114	17	RPL19|RPS15A|PPP2R1A|RPS2|RPLP1|RPS3A|RPL34|GSPT1|RPL6|RPL10|RPS13|RPS4Y2|RPL9|RPS7|RPL11|EIF4A3|RPS27
Reactome Pathways	Nonsense Mediated Decay (NMD) independent of the Exon Junction Complex (EJC)	6.03e-06	3031	2.06e-07	0.521968	HSA-975956	94	15	RPL19|RPS15A|RPS2|RPLP1|RPS3A|RPL34|GSPT1|RPL6|RPL10|RPS13|RPS4Y2|RPL9|RPS7|RPL11|RPS27
WikiPathways	NRF2-ARE regulation	0.0015	3031	9.88e-05	0.282391	WP4357	23	6	AIMP2|CUL3|NQO1|FYN|EPHB2|YES1
WikiPathways	NRP1-triggered signaling pathways in pancreatic cancer	0.01	3031	0.00095	0.2	WP5144	52	7	MAP2K2|NRP1|EGFR|MAP2K1|MET|PTK2|PLXNA1
Reactome Pathways	Nuclear Envelope (NE) Reassembly	0.0039	3031	0.00037	0.240894	HSA-2995410	74	9	CCNB1|TUBB4A|TUBB6|TUBB3|PPP2R1A|TUBB4B|ANKLE2|TUBA1C|RAN
Reactome Pathways	Nuclear events mediated by NFE2L2	0.00034	3031	2.2e-05	0.346852	HSA-9759194	77	11	PSMC4|PSMD10|PSMA2|PSMC1|PSMD11|PGD|NQO1|PSMD12|PSME1|TKT|TXNRD1
GO Cellular Component	Nuclear lumen	0.0048	3031	0.00036	0.231876	GO:0031981	4526	159	BAIAP2L1|DVL2|RANBP9|MRI1|PSMC4|SNAP29|TAB1|PSMD10|RP2|NAMPT|PSMA2|RPL19|DDX39A|TRAP1|SNAP23|TSG101|GRWD1|LGALS3|CCNB1|NOTCH2|PSMC1|IPO5|PSMD11|SMURF2|AJUBA|PACSIN2|SLC9A1|EHBP1|CUL3|PDCD6|CDH6|SRI|PIK3C2A|NONO|VPS51|USP15|AKR1B1|UBE2L6|NRG1|IGF2BP1|CSTB|ABI2|CYTH3|INPPL1|COPS2|STAT6|DDX19A|SRP68|CSPG4|GNAI2|CPNE1|VPS37A|RPS15A|FMN2|BASP1|UGDH|NUDC|HNRNPM|XPOT|PLCB1|BRIX1|EZR|PARK7|RPS2|TP53BP2|F…
GO Biological Process	Nucleobase biosynthetic process	0.0092	3031	0.0003	0.203621	GO:0046112	18	5	HPRT1|CMPK1|APRT|GART|GMPS
GO Biological Process	Nucleobase-containing small molecule metabolic process	1.05e-05	3031	1.57e-07	0.497881	GO:0055086	567	40	AHCY|NAMPT|AK1|GALK1|ACAT1|PFKL|ATP5MF|HPRT1|PFAS|UGDH|PKM|ENO3|ACSL4|PARK7|DLG1|ATP5F1C|EPHA2|MPP1|GNAI3|DPM1|CMPK1|ACOT7|APRT|ITPA|ASMTL|GART|GARS1|RHOA|GMPS|PARP10|TJP2|NNMT|RAN|COASY|ADSL|MTAP|CASK|ENO1|MTHFD1|AMPD2
GO Cellular Component	Nucleoplasm	0.0229	3031	0.0021	0.164016	GO:0005654	4169	143	BAIAP2L1|DVL2|RANBP9|MRI1|PSMC4|SNAP29|TAB1|PSMD10|RP2|NAMPT|PSMA2|DDX39A|TRAP1|SNAP23|GRWD1|LGALS3|CCNB1|NOTCH2|PSMC1|PSMD11|SMURF2|AJUBA|PACSIN2|SLC9A1|EHBP1|CUL3|PDCD6|CDH6|SRI|PIK3C2A|NONO|USP15|AKR1B1|UBE2L6|NRG1|IGF2BP1|ABI2|CYTH3|INPPL1|COPS2|STAT6|DDX19A|CSPG4|GNAI2|CPNE1|VPS37A|RPS15A|BASP1|UGDH|NUDC|HNRNPM|XPOT|PLCB1|PARK7|RPS2|TP53BP2|FERMT2|RPS3A|PDLIM7|PSMD12|SCRIB|COPS5|CASP8|PCBP2|…
GO Molecular Function	Nucleoside monophosphate kinase activity	0.0034	3031	5.13e-05	0.246852	GO:0050145	20	6	AK1|DLG1|MPP1|CMPK1|TJP2|CASK
GO Molecular Function	Nucleoside-triphosphatase activity	1.78e-12	3031	8.64e-15	1.17496	GO:0017111	650	59	ARF5|RALA|PSMC4|YTHDC2|RAB35|DDX39A|TRAP1|RRAS2|ARF3|CCT7|PSMC1|RAB2A|RAB10|RAB7A|ARL8A|RALB|RASA1|CCT6A|CCT5|GNAQ|MYO1E|ARF6|DDX19A|RAB1B|GNAI2|TCP1|RAP2B|TUFM|EIF4A2|RAB12|ATP11C|RAB11B|SEPTIN6|ATP2B4|LONP1|KIF14|RAB13|NRAS|RAP1A|GNAI3|HSPA1L|SEPTIN8|DNM2|CCT4|RAB2B|RAB1A|ATP2B1|GSPT1|RHOA|SEPTIN7|DDX46|ARL15|ATP1A1|RAN|ARL8B|SEPTIN2|EIF4A3|CDC42|ARHGAP35
GO Molecular Function	Nucleotide binding	3.67e-25	3031	5.95e-28	2.44353	GO:0000166	2168	154	ARF5|RALA|PSMC4|YTHDC2|AHCY|RP2|CSK|EHD4|RIPK2|AK1|ACTA2|GALK1|RAB35|DDX39A|TRAP1|PI4KA|RRAS2|ARF3|CCT7|PSMC1|MPP5|TAOK1|AARS1|PDGFRB|RAB2A|MAP2K2|ACTR3|EHD2|TUBB4A|RAPGEF2|RAB10|RAB7A|PRKAR2A|ACAT1|PIK3C2A|IDE|PFKL|SCYL1|PGD|ARL8A|RALB|EGFR|CCT6A|CCT5|QDPR|GNAQ|UBE2L6|MYO1E|ARF6|HPRT1|AXL|MAP2K1|BCR|DDX19A|RAB1B|ACAD9|GNAI2|PFAS|DNAJA2|PAK2|MET|TCP1|TUBB6|RAP2B|UGDH|PKM|TUBB3|FARSA|TUFM|EIF4A2|R…
GO Biological Process	Nucleotide biosynthetic process	9.99e-05	3031	1.92e-06	0.400043	GO:0009165	276	24	NAMPT|AK1|ACAT1|ATP5MF|HPRT1|PFAS|ACSL4|DLG1|ATP5F1C|MPP1|CMPK1|ACOT7|APRT|GART|GARS1|GMPS|PARP10|TJP2|NNMT|COASY|ADSL|CASK|MTHFD1|AMPD2
GO Biological Process	Nucleotide metabolic process	1.94e-05	3031	3.09e-07	0.47122	GO:0009117	493	36	NAMPT|AK1|GALK1|ACAT1|PFKL|ATP5MF|HPRT1|PFAS|PKM|ENO3|ACSL4|PARK7|DLG1|ATP5F1C|EPHA2|MPP1|GNAI3|CMPK1|ACOT7|APRT|ITPA|ASMTL|GART|GARS1|RHOA|GMPS|PARP10|TJP2|NNMT|RAN|COASY|ADSL|CASK|ENO1|MTHFD1|AMPD2
Reactome Pathways	Nucleotide salvage defects	0.0401	3031	0.0067	0.139686	HSA-9734207	3	2	HPRT1|APRT
UniProt Keywords	Nucleotide-binding	4.22e-25	3031	2.51e-27	2.43747	KW-0547	1776	136	ARF5|RALA|PSMC4|YTHDC2|RP2|CSK|EHD4|RIPK2|AK1|ACTA2|GALK1|RAB35|DDX39A|TRAP1|PI4KA|RRAS2|ARF3|CCT7|PSMC1|MPP5|TAOK1|AARS1|PDGFRB|RAB2A|MAP2K2|ACTR3|EHD2|TUBB4A|RAB10|RAB7A|PRKAR2A|PIK3C2A|IDE|PFKL|ARL8A|RALB|EGFR|CCT6A|CCT5|GNAQ|MYO1E|ARF6|HPRT1|AXL|MAP2K1|BCR|DDX19A|RAB1B|GNAI2|PFAS|PAK2|MET|TCP1|TUBB6|RAP2B|PKM|TUBB3|FARSA|TUFM|EIF4A2|RAB12|ATP11C|RAB11B|SRR|ACSL4|PTK2|TUBB4B|SEPTIN6|MAP4K4|FYN…
GO Cellular Component	Nucleus	0.0082	3031	0.00066	0.208619	GO:0005634	7672	248	BAIAP2L1|DVL2|RANBP9|MRI1|PSMC4|YTHDC2|EFNB1|SNAP29|TAB1|AHCY|PSMD10|RP2|EHD4|NAMPT|AIMP2|PSMA2|RPL19|SLC25A11|LRRC59|ARPC3|DOK1|DDX39A|PLCG1|TRAP1|SNAP23|TSG101|GRWD1|LGALS3|CCNB1|NOTCH2|PSMC1|IPO5|PSMD11|PDGFRB|HACD3|COTL1|SMURF2|RAB2A|AJUBA|MAP2K2|ACTR3|PACSIN2|EHD2|SLC9A1|EHBP1|TUBB4A|CUL3|PDCD6|CDH6|TNPO3|SRI|PIK3C2A|IDE|IQGAP1|SCYL1|PGD|EGFR|NONO|VPS51|USP15|FLCN|AKR1B1|GNAQ|UBE2L6|NRG1|IGF…
WikiPathways	Oncostatin M signaling pathway	0.0262	3031	0.0028	0.15817	WP2374	64	7	SERPINE1|MAP2K2|PXN|MAP2K1|IL6ST|SHC1|JAK1
Reactome Pathways	Opioid Signalling	0.0037	3031	0.00034	0.24318	HSA-111885	90	10	PRKAR2A|GNAQ|GNAI2|PPP2R1A|PLCB1|GNAI3|PPP3CB|PPP2R5D|CDK5|PLCB3
Monarch Phenotype	Opisthotonus	0.0161	3031	0.00026	0.179317	HP:0002179	41	7	HPRT1|UGDH|TUFM|CYB5R3|GPHN|ADSL|PHGDH
Monarch Phenotype	Optic disc measurement	0.0312	3031	0.00063	0.150585	EFO:0006936	136	12	EXOC2|CDH2|FILIP1L|MYPN|CDC42BPA|PKN2|MAPRE1|FAT4|FLNB|AMOTL2|BCAS3|HSPA12A
Monarch Phenotype	Oral cleft	0.0301	3031	0.00059	0.152143	HP:0000202	665	34	EFNB1|NOTCH2|MAP2K2|ARCN1|CDH11|NONO|ANK3|NRG1|INPPL1|MAP2K1|SEC23A|RPS15A|BGN|DLG1|FILIP1L|KIF14|MAP3K7|GNAI3|NSDHL|STXBP1|FGD1|CTNND1|PHLDB2|PPP2R5D|FLNB|DAG1|ACTG1|YAP1|PHGDH|CASK|RPS7|RPL11|EIF4A3|TTC37
Reactome Pathways	Orc1 removal from chromatin	0.0288	3031	0.0044	0.154061	HSA-68949	70	7	PSMC4|PSMD10|PSMA2|PSMC1|PSMD11|PSMD12|PSME1
COMPARTMENTS	Organelle	3.48e-30	3031	1.51e-32	2.94584	GOCC:0043226	10113	413	RALA|BAIAP2L1|DVL2|RANBP9|MRI1|PSMC4|YTHDC2|EFNB1|SNAP29|TAB1|PYGB|PSMD10|RP2|CSK|EHD4|RIPK2|TBC1D17|NAMPT|SNX8|SERPINE1|PSMA2|YKT6|SEC61B|AK1|ACTA2|RPL19|GALK1|SLC25A11|LRRC59|CD82|ARPC3|RAB35|SNX17|DOK1|SLC1A4|DDX39A|ADGRE5|PLCG1|VASP|TRAP1|CANX|PMPCB|SNAP23|TSG101|CNN1|HIP1R|GRWD1|WDR44|LGALS3|PI4KA|RRAS2|CCNB1|NOTCH2|ARF3|PRPH|CCT7|TBRG4|ITGAV|PSMC1|IPO5|MPP5|PSMD11|TAOK1|ANKRD13A|PDGFRB|HACD…
GO Cellular Component	Organelle	4.24e-24	3031	4.98e-26	2.33726	GO:0043226	14017	486	ARF5|RALA|BAIAP2L1|DVL2|RANBP9|MRI1|PSMC4|YTHDC2|EFNB1|SNAP29|TAB1|PYGB|AHCY|PSMD10|RP2|CSK|EHD4|RIPK2|TBC1D17|CDC37|NAMPT|MPP6|SNX8|AIMP2|SERPINE1|PSMA2|YKT6|SEC61B|AK1|ACTA2|RPL19|GALK1|SLC25A11|LRRC59|CD82|ARPC3|RAB35|SNX17|DOK1|SLC1A4|DDX39A|ADGRE5|PLCG1|VASP|TRAP1|CANX|CDC42EP1|PMPCB|SNAP23|TSG101|CNN1|NECTIN2|HIP1R|GRWD1|WDR44|LGALS3|PI4KA|RRAS2|CCNB1|NOTCH2|ARF3|PRPH|CCT7|TBRG4|ITGAV|PSMC1…
GO Biological Process	Organelle assembly	0.00078	3031	1.84e-05	0.310791	GO:0070925	799	44	SNAP29|RP2|EHD4|TSG101|NECTIN2|PDGFRB|ACTR3|EHD2|FARP2|RAB7A|VPS37B|DNAAF5|RAB1B|VPS37A|HGS|PLS1|BRIX1|EZR|SEPTIN6|ATG7|AP1B1|TPM1|MYPN|VTA1|NEK6|MAPRE1|XRCC5|ITGB1|ATG4B|AGFG1|RAB1A|RHOA|RPL6|RPL10|SEPTIN7|NSFL1C|ACTG1|EHD1|ARL8B|SEPTIN2|CSDE1|UBAP1|RPL11|RPS27
Reactome Pathways	Organelle biogenesis and maintenance	0.007	3031	0.00077	0.21549	HSA-1852241	293	19	RP2|EXOC2|EXOC4|TUBB4A|CCT5|ATP5MF|YWHAG|TCP1|TUBB6|TUBB3|PPP2R1A|EXOC7|TUBB4B|ATP5F1C|MAPRE1|CCT4|PRKAB1|TUBA1C|SEPTIN2
GO Biological Process	Organelle localization	2.09e-09	3031	1.45e-11	0.867985	GO:0051640	514	46	SNAP29|YKT6|EXOC2|SNAP23|TSG101|NECTIN2|EXOC4|CCNB1|ACTR3|ARCN1|CBL|CUL3|RAB10|PDCD6|RAB7A|FLCN|MYO1E|FMN2|NUDC|LLGL1|COPG1|RAB12|RAB11B|EXOC7|EZR|DLG1|SCRIB|COPS5|KIF14|RAB13|STXBP3|STXBP1|PARD3|MAPRE1|DNM2|WASF1|PICALM|ITGB1|RAB1A|NSFL1C|CDK5|CFL1|RAN|ARL8B|CTNNB1|CDC42
GO Biological Process	Organelle localization by membrane tethering	0.0065	3031	0.0002	0.218709	GO:0140056	84	10	SNAP29|YKT6|EXOC2|EXOC4|RAB10|RAB12|EXOC7|RAB13|STXBP3|STXBP1
COMPARTMENTS	Organelle membrane	1.02e-05	3031	2.92e-07	0.49914	GOCC:0031090	2290	104	RALA|SNAP29|EHD4|SNX8|YKT6|SEC61B|SLC25A11|LRRC59|RAB35|SNX17|TRAP1|CANX|PMPCB|SNAP23|TSG101|HIP1R|WDR44|LGALS3|PI4KA|ARF3|ITGAV|SNX1|RAB2A|MAP2K2|PACSIN2|EHD2|ARCN1|RAB10|PDCD6|RAB7A|SRI|VPS37B|SCYL1|ARL8A|EGFR|VPS51|FLCN|ATP5MF|BAX|RPN1|CYTH3|ARF6|SEC23A|RAB1B|ARHGAP1|ACAD9|CPNE1|VPS37A|RAP2B|LLGL1|PDIA5|COPG1|AP2A2|HGS|RAB12|RAB11B|ACSL4|SNX18|ANXA2|ATP5F1C|AP1B1|ANKLE2|CASP8|AP2A1|CYB5R3|VTA1…
GO Cellular Component	Organelle membrane	0.0019	3031	0.00013	0.272125	GO:0031090	3673	136	RALA|SNAP29|TAB1|EHD4|SNX8|YKT6|SEC61B|SLC25A11|LRRC59|RAB35|SNX17|ADGRE5|TRAP1|CANX|PMPCB|SNAP23|TSG101|HIP1R|WDR44|LGALS3|PI4KA|RRAS2|NOTCH2|ARF3|ITGAV|HACD3|SNX1|SLC12A2|RAB2A|MAP2K2|PACSIN2|EHD2|SLC9A1|ARCN1|RAB10|PDCD6|RAB7A|NRP1|SRI|VPS37B|IQGAP1|SCYL1|ARL8A|EGFR|VPS51|FLCN|GNAQ|ATP5MF|BAX|RPN1|ERAP1|CYTH3|ARF6|SEC23A|RAB1B|ARHGAP1|ACAD9|CPNE1|VPS37A|FMN2|RAP2B|LLGL1|PDIA5|NAPG|COPG1|AP2A2|…
GO Biological Process	Organelle organization	9.61e-10	3031	6.07e-12	0.901728	GO:0006996	3470	161	RALA|BAIAP2L1|RANBP9|SNAP29|RP2|EHD4|ARPC3|VASP|PMPCB|SNAP23|TSG101|CNN1|NECTIN2|HIP1R|GRWD1|CCNB1|PRPH|TAOK1|PDGFRB|RAB2A|AJUBA|ACTR3|PACSIN2|EHD2|SLC9A1|EHBP1|FARP2|TUBB4A|CUL3|RAB10|PDCD6|RAB7A|NRP1|VPS37B|VPS51|ANK3|MYO1E|BAX|ABI2|ITGB5|DNAAF5|INPPL1|ARF6|CRK|BCR|CTNNA1|SEC23A|RAB1B|ACAD9|VPS37A|TUBB6|FMN2|NUDC|TUBB3|LLGL1|PPP2R1A|HGS|FMNL3|PLS1|EPB41L1|BRIX1|EZR|PARK7|RAP1GDS1|TUBB4B|SEPTIN6…
GO Molecular Function	Organic cyclic compound binding	2.88e-08	3031	2.57e-10	0.754061	GO:0097159	6050	236	ARF5|RALA|PSMC4|YTHDC2|PYGB|TPD52L2|AHCY|RP2|CSK|EHD4|RIPK2|SEC61B|AK1|ACTA2|RPL19|GALK1|SLC25A11|LRRC59|RAB35|DDX39A|TRAP1|CANX|TSG101|GRWD1|LGALS3|PI4KA|RRAS2|ARF3|CCT7|TBRG4|PSMC1|IPO5|MPP5|TAOK1|AARS1|PDGFRB|RAB2A|MAP2K2|ACTR3|EHD2|ARCN1|TUBB4A|RAPGEF2|RAB10|RAB7A|PRKAR2A|ACAT1|PIK3C2A|IDE|CDH2|PFKL|SCYL1|PGD|ARL8A|RALB|EGFR|CCT6A|NONO|CCT5|QDPR|GNAQ|UBE2L6|MYO1E|IGF2BP1|CSTB|RPN1|ARF6|HPRT1|…
GO Biological Process	Organic substance metabolic process	0.0277	3031	0.0011	0.155752	GO:0071704	7522	242	MRI1|PSMC4|TAB1|PYGB|TPD52L2|AHCY|CSK|RIPK2|NAMPT|AIMP2|PSMA2|SEC61B|AK1|RPL19|GALK1|SNX17|DDX39A|PLCG1|CANX|PMPCB|TSG101|NUMBL|GRWD1|LGALS3|EFR3A|PI4KA|CCNB1|TBRG4|ITGAV|PSMC1|MPP5|PSMD11|TAOK1|AARS1|PDGFRB|HACD3|SMURF2|AJUBA|MAP2K2|CBL|CUL3|RAB7A|NRP1|ACAT1|PIK3C2A|IDE|VPS37B|PFKL|SCYL1|PGD|EGFR|NONO|USP15|QDPR|RPIA|SH3RF1|AKR1B1|UBE2L6|ZDHHC5|NRG1|ATP5MF|BAX|ABI2|RPN1|ERAP1|INPPL1|HPRT1|COPS2|…
GO Biological Process	Organic substance transport	2.57e-08	3031	2.16e-10	0.759007	GO:0071702	1957	103	ARF5|SNAP29|RP2|TBC1D17|CDC37|SNX8|YKT6|SEC61B|SLC25A11|RAB35|EXOC2|SNX17|SLC1A4|DDX39A|CANX|PMPCB|SNAP23|TSG101|EXOC4|ARF3|IPO5|SNX1|RAB2A|NAPA|EHBP1|ARCN1|RAB10|PDCD6|RAB7A|TNPO3|VPS37B|ARL8A|VPS51|ANK3|ZDHHC5|IGF2BP1|BAX|ARF6|BCR|DDX19A|YWHAG|SEC23A|RAB1B|ARHGAP1|SRP68|TCP1|VPS37A|FMN2|NAPG|COPG1|AP2A2|XPOT|HGS|RAB12|ATP11C|RAB11B|EXOC7|PLS1|EZR|PARK7|SNX18|ATG7|SCRIB|AP1B1|AP2A1|IPO9|VTA1|RAB…
TISSUES	Organism form	3.09e-34	3031	2.29e-36	3.351	BTO:0000284	2542	186	RANBP9|PSMC4|EFNB1|TPD52L2|AHCY|PSMD10|EHD4|CDC37|SERPINE1|PSMA2|SEC61B|ACTA2|EXOC2|SNX17|ADGRE5|CANX|SNAP23|TSG101|CNN1|CCNB1|ARF3|PRPH|CCT7|PSMC1|PSMD11|AARS1|SNX1|COTL1|EHD2|NAPA|PPP1R12C|SLC9A1|TUBB4A|RAPGEF2|PDCD6|RAB7A|PXN|IQGAP1|CDH2|RASA1|EGFR|NONO|CCT5|USP15|ANK3|AKR1B1|GNAQ|CSTB|ITGA5|ANXA5|CYTH3|CRK|CTNNA1|MMP14|RAB1B|DNAJA2|PAK2|RPS15A|RAP2B|UGDH|PKM|TUFM|PPP2R1A|COPG1|HNRNPM|RIC8A|EI…
GO Biological Process	Organonitrogen compound biosynthetic process	0.00075	3031	1.76e-05	0.312494	GO:1901566	1338	64	MRI1|NAMPT|AIMP2|AK1|RPL19|AARS1|PDGFRB|HACD3|ACAT1|QDPR|ZDHHC5|ATP5MF|RPN1|HPRT1|PFAS|RPS15A|UGDH|FARSA|TUFM|EIF4A2|FTSJ1|SRR|ACSL4|RPS2|RPLP1|RPS3A|ATG7|ATP5F1C|COPS5|RARS2|DPM1|CMPK1|YARS1|EIF2S2|SRM|ACOT7|APRT|EIF1AX|GART|GARS1|ASNS|RPL34|GSPT1|DDOST|AARSD1|RPL6|RPL10|EIF2B1|GPHN|GMPS|PARP10|RPS13|NNMT|COASY|ADSL|RPS4Y2|PHGDH|MTAP|RPL9|RPS7|RPL11|MTHFD1|RPS27|AMPD2
GO Biological Process	Organonitrogen compound metabolic process	9.8e-05	3031	1.88e-06	0.400877	GO:1901564	4981	186	MRI1|PSMC4|TAB1|AHCY|CSK|RIPK2|NAMPT|AIMP2|PSMA2|SEC61B|AK1|RPL19|GALK1|CANX|PMPCB|TSG101|NUMBL|CCNB1|PSMC1|PSMD11|TAOK1|AARS1|PDGFRB|HACD3|SMURF2|MAP2K2|CBL|CUL3|RAB7A|NRP1|ACAT1|IDE|VPS37B|PFKL|SCYL1|EGFR|USP15|QDPR|SH3RF1|UBE2L6|ZDHHC5|NRG1|ATP5MF|BAX|ABI2|RPN1|ERAP1|HPRT1|COPS2|AXL|MAP2K1|BCR|ABR|MMP14|PFAS|PAK2|CPNE1|MET|VPS37A|RPS15A|UGDH|PKM|FARSA|NPEPPS|TUFM|ENO3|PPP2R1A|EIF4A2|FTSJ1|BGN|…
GO Biological Process	Organophosphate biosynthetic process	0.00084	3031	2.01e-05	0.307572	GO:0090407	551	34	NAMPT|AK1|EFR3A|PI4KA|AJUBA|ACAT1|PIK3C2A|ATP5MF|INPPL1|HPRT1|PFAS|ACSL4|DLG1|ATP5F1C|MPP1|DPM1|CMPK1|PIP4K2A|ACOT7|APRT|GART|GARS1|TKT|GPHN|GMPS|PARP10|TJP2|NNMT|COASY|PIP5K1C|ADSL|CASK|MTHFD1|AMPD2
GO Biological Process	Organophosphate metabolic process	6.91e-05	3031	1.27e-06	0.416052	GO:0019637	914	52	NAMPT|AK1|GALK1|PLCG1|EFR3A|PI4KA|PDGFRB|AJUBA|ACAT1|PIK3C2A|PFKL|PGD|RPIA|ATP5MF|INPPL1|HPRT1|PFAS|PKM|ENO3|PLCB1|ACSL4|PARK7|DLG1|ATP5F1C|EPHA2|MPP1|GNAI3|DPM1|CMPK1|PIP4K2A|ACOT7|APRT|ITPA|ASMTL|GART|GARS1|TKT|RHOA|GPHN|GMPS|PARP10|TJP2|NNMT|PLCB3|RAN|COASY|PIP5K1C|ADSL|CASK|ENO1|MTHFD1|AMPD2
TISSUES	Osteosarcoma cell	0.0494	3031	0.0023	0.130627	BTO:0000970	45	6	CCT7|AARS1|CDH11|PTK2|ANXA2|ATP5F1C
TISSUES	Ovary	0.00026	3031	8.75e-06	0.358503	BTO:0000975	528	34	TUBB4A|CUL3|PDCD6|TNPO3|SH3RF1|ANXA5|PKM|RPS2|ANXA2|RPS3A|EPHB4|PLXNB2|MPZL1|UTRN|RAB13|CLIC4|AHNAK|SBF1|DNM2|RPL34|NFATC4|RPL6|PARP14|FLNB|CFL1|SERPINH1|TXNRD1|ATP1A1|RAN|ACTG1|COASY|COBLL1|RPL9|ENO1
Reactome Pathways	Oxygen-dependent proline hydroxylation of Hypoxia-inducible Factor Alpha	0.0017	3031	0.00014	0.276955	HSA-1234176	64	9	PSMC4|PSMD10|PSMA2|PSMC1|PSMD11|AJUBA|PSMD12|PSME1|CUL2
STRING Clusters	Oxygen-dependent proline hydroxylation of Hypoxia-inducible Factor Alpha, and Proteasome assembly	0.029	3031	0.00067	0.15376	CL:3696	81	9	PSMC4|PSMD10|PSMA2|PSMC1|PSMD11|AJUBA|PSMD12|PSME1|CUL2
KEGG Pathways	Oxytocin signaling pathway	2.53e-05	3031	1.96e-06	0.459688	hsa04921	147	17	MAP2K2|PPP1R12C|EGFR|GNAQ|MAP2K1|GNAI2|PLCB1|MYLK|NRAS|GNAI3|PPP3CB|NFATC4|PPP1R12A|RHOA|PRKAB1|PLCB3|ACTG1
InterPro Domains	P-loop containing nucleoside triphosphate hydrolase	5.85e-09	3031	1.63e-12	0.823284	IPR027417	872	65	ARF5|RALA|PSMC4|YTHDC2|EHD4|MPP6|AK1|RAB35|DDX39A|RRAS2|ARF3|PSMC1|MPP5|RAB2A|EHD2|RAB10|RAB7A|IQGAP1|ARL8A|RALB|GNAQ|MYO1E|ARF6|DDX19A|RAB1B|GNAI2|RAP2B|TUFM|EIF4A2|RAB12|RAB11B|SEPTIN6|DLG1|LONP1|KIF14|RAB13|MPP1|NRAS|RAP1A|GNAI3|CMPK1|DLG5|SEPTIN8|DNM2|RAB2B|ABCC1|MAGI1|RAB1A|GSPT1|RHOA|SEPTIN7|DDX46|MYO10|ARL15|TJP2|RAN|COASY|EHD1|ARL8B|SEPTIN2|CASK|EIF4A3|CDC42|MTHFD1|ARHGAP35
SMART Domains	P21-Rho-binding domain	0.0374	3031	0.0011	0.142713	SM00285	14	4	CDC42EP1|PAK2|CDC42BPA|CDC42EP3
Reactome Pathways	p38MAPK events	0.0468	3031	0.0082	0.132975	HSA-171007	13	3	RALA|RALB|NRAS
Monarch Phenotype	Pachygyria	0.0388	3031	0.00084	0.141117	HP:0001302	141	12	SNAP29|PI4KA|ANKLE2|KIF14|NSDHL|STXBP1|FAT4|RAB3GAP1|DAG1|ACTG1|PHGDH|CASK
GO Biological Process	Pallium development	0.00089	3031	2.14e-05	0.305061	GO:0021543	179	17	MPP5|CDH2|EGFR|IGF2BP1|BAX|CRK|PLCB1|ATP2B4|KIF14|GART|FAT4|RHOA|SLC2A1|CDK5|SRGAP2C|PPP1R9B|CTNNB1
UniProt Keywords	Palmitate	0.0374	3031	0.0037	0.142713	KW-0564	339	19	RP2|YKT6|SEC61B|CANX|SNAP23|EFR3A|RRAS2|EGFR|GNAQ|ZDHHC5|GNAI2|ITGA3|RAP2B|PARK7|FYN|MPP1|NRAS|GNAI3|YES1
TISSUES	Pancreas	3.7e-06	3031	1.07e-07	0.54318	BTO:0000988	626	43	PSMC4|SNAP29|YKT6|ACTA2|HIP1R|CCT7|PSMD11|EHD2|RAB1B|ARHGAP1|PKM|EIF4A2|EPB41L1|RPS2|CTSB|ANXA2|RPLP1|RPS3A|FILIP1L|EPHB4|EPHA2|MSN|PDLIM1|ANXA7|NEK6|AHNAK|GDI2|ARAP1|SEC31A|RPL6|MPST|RPL10|CFL1|RPS13|TJP2|ATP1A1|ACTG1|YAP1|RPL9|RPS7|ENO1|RPL11|TPM2
WikiPathways	Pancreatic adenocarcinoma pathway	0.001	3031	5.52e-05	0.3	WP4263	86	11	RALA|MAP2K2|RALB|EGFR|BAX|MAP2K1|PAK2|CHUK|RHOA|CDC42|JAK1
KEGG Pathways	Pancreatic cancer	0.0059	3031	0.0012	0.222915	hsa05212	71	8	RALA|RALB|EGFR|BAX|MAP2K1|CHUK|CDC42|JAK1
KEGG Pathways	Pancreatic secretion	0.0034	3031	0.00058	0.246852	hsa04972	97	10	SLC12A2|SLC9A1|GNAQ|PLCB1|ATP2B4|RAP1A|ATP2B1|RHOA|PLCB3|ATP1A1
COMPARTMENTS	PAR polarity complex	0.0236	3031	0.0014	0.162709	GOCC:0120157	6	3	MPP5|SCRIB|PARD3
Reactome Pathways	Paradoxical activation of RAF signaling by kinase inactive BRAF	0.0044	3031	0.00044	0.235655	HSA-6802955	45	7	CSK|MAP2K2|IQGAP1|MAP2K1|NRAS|RAP1A|ACTG1
KEGG Pathways	Parathyroid hormone synthesis, secretion and action	0.005	3031	0.00096	0.230103	hsa04928	104	10	EGFR|GNAQ|MAP2K1|MMP14|GNAI2|ARHGEF1|PLCB1|GNAI3|RHOA|PLCB3
WikiPathways	Parkin-ubiquitin proteasomal system pathway	3.15e-06	3031	5.24e-08	0.550169	WP2359	71	14	PSMC4|PSMD10|PSMC1|PSMD11|TUBB4A|UBE2L6|TUBB6|TUBB3|TUBB4B|PSMD12|CASP8|HSPA1L|TUBA1C|CASK
KEGG Pathways	Parkinson disease	0.00045	3031	5.92e-05	0.334679	hsa05012	236	19	PSMC4|PSMA2|PLCG1|TRAP1|PSMC1|PSMD11|TUBB4A|UBE2L6|BAX|GNAI2|TUBB6|TUBB3|PARK7|TUBB4B|PSMD12|ATP5F1C|GNAI3|SLC25A6|TUBA1C
KEGG Pathways	Pathogenic Escherichia coli infection	3.97e-12	3031	2.72e-14	1.14012	hsa05130	187	31	BAIAP2L1|TAB1|ARPC3|TUBB4A|MYO1E|BAX|CYTH3|ARF6|PAK2|TUBB6|TUBB3|ARHGEF1|EZR|TUBB4B|FYN|CASP8|NCKAP1|MAP3K7|CHUK|ABI1|WASF1|ITGB1|RAB1A|ARPC1B|RHOA|MYO10|TUBA1C|ACTG1|CYFIP1|WASF2|CDC42
WikiPathways	Pathogenic Escherichia coli infection	3.52e-07	3031	3.15e-09	0.645346	WP2272	55	14	ARPC3|TUBB4A|TUBB6|TUBB3|EZR|TUBB4B|FYN|ITGB1|ARPC1B|RHOA|TUBA1C|ACTG1|CTNNB1|CDC42
KEGG Pathways	Pathways in cancer	3.14e-07	3031	1.4e-08	0.650307	hsa05200	515	40	RALA|DVL2|PLCG1|NOTCH2|ITGAV|PDGFRB|MAP2K2|CBL|RALB|EGFR|GNAQ|BAX|ITGA2|STAT6|CRK|MAP2K1|BCR|CTNNA1|GNAI2|ITGA3|MET|NQO1|ARHGEF1|PLCB1|PTK2|CASP8|NRAS|GNAI3|CHUK|STK4|IL6ST|ITGB1|RHOA|CUL2|SLC2A1|TXNRD1|PLCB3|CTNNB1|CDC42|JAK1
Reactome Pathways	PCP/CE pathway	8.55e-05	3031	4.01e-06	0.406803	HSA-4086400	91	13	DVL2|PSMC4|PSMD10|PSMA2|PSMC1|PSMD11|SMURF2|AP2A2|PSMD12|SCRIB|AP2A1|PSME1|RHOA
KEGG Pathways	PD-L1 expression and PD-1 checkpoint pathway in cancer	0.0145	3031	0.0039	0.183863	hsa05235	87	8	PLCG1|MAP2K2|EGFR|MAP2K1|NRAS|CHUK|PPP3CB|JAK1
WikiPathways	PDGF pathway	0.00015	3031	5.09e-06	0.382391	WP2526	40	9	PLCG1|PDGFRB|RASA1|MAP2K1|CHUK|RHOA|SHC1|CDC42|JAK1
WikiPathways	PDGFR-beta pathway	0.00077	3031	3.95e-05	0.311351	WP3972	29	7	PLCG1|PDGFRB|RASA1|STAT6|MAP2K1|SHC1|JAK1
InterPro Domains	PDZ domain	1.23e-06	3031	1.4e-09	0.591009	IPR001478	151	22	DVL2|MPP6|MPP5|RAPGEF2|RAPGEF6|MPDZ|DLG1|PDLIM7|SCRIB|AFDN|MPP1|PDLIM1|DLG5|PARD3|AHNAK|GIPC1|MAGI1|ERBIN|TJP2|SIPA1L1|PPP1R9B|CASK
InterPro Domains	PDZ superfamily	1.56e-06	3031	2.17e-09	0.580688	IPR036034	155	22	DVL2|MPP6|MPP5|RAPGEF2|RAPGEF6|MPDZ|DLG1|PDLIM7|SCRIB|AFDN|MPP1|PDLIM1|DLG5|PARD3|AHNAK|GIPC1|MAGI1|ERBIN|TJP2|SIPA1L1|PPP1R9B|CASK
Reactome Pathways	PECAM1 interactions	0.0065	3031	0.00071	0.218709	HSA-210990	12	4	PLCG1|ITGAV|FYN|YES1
Monarch Phenotype	Pectus excavatum	0.0142	3031	0.00022	0.184771	HP:0000767	241	18	EFNB1|PI4KA|RRAS2|MAP2K2|CBL|CDH11|INPPL1|MAP2K1|MET|PPP2R1A|MYPN|MAP3K7|NRAS|FGD1|RAB3GAP1|FLNB|ITGA7|TPM2
WikiPathways	Pentose phosphate metabolism	0.0192	3031	0.002	0.17167	WP134	7	3	PGD|RPIA|TKT
KEGG Pathways	Pentose phosphate pathway	0.0342	3031	0.0111	0.146597	hsa00030	29	4	PFKL|PGD|RPIA|TKT
Reactome Pathways	Peptide chain elongation	1.45e-05	3031	5.41e-07	0.483863	HSA-156902	88	14	RPL19|RPS15A|RPS2|RPLP1|RPS3A|RPL34|RPL6|RPL10|RPS13|RPS4Y2|RPL9|RPS7|RPL11|RPS27
GO Biological Process	Peptide metabolic process	0.0016	3031	4.05e-05	0.279588	GO:0006518	547	33	AIMP2|RPL19|AARS1|IDE|ERAP1|RPS15A|FARSA|NPEPPS|TUFM|EIF4A2|FTSJ1|PARK7|RPS2|RPLP1|RPS3A|COPS5|RARS2|YARS1|EIF2S2|EIF1AX|GARS1|RPL34|GSPT1|AARSD1|RPL6|RPL10|EIF2B1|RPS13|RPS4Y2|RPL9|RPS7|RPL11|RPS27
GO Biological Process	Peptidyl-tyrosine phosphorylation	3.67e-07	3031	3.91e-09	0.643533	GO:0018108	176	23	CSK|RIPK2|PDGFRB|MAP2K2|NRP1|SCYL1|EGFR|ABI2|AXL|MAP2K1|BCR|MET|PKM|PTK2|FYN|EPHB4|EPHA2|ABI1|EPHB2|PBK|PEAK1|YES1|JAK1
COMPARTMENTS	Perinuclear region of cytoplasm	0.00077	3031	3.02e-05	0.311351	GOCC:0048471	286	22	TPD52L2|DOK1|HIP1R|WDR44|ANKRD13A|MAP2K2|RAPGEF2|PAK2|EZR|TP53BP2|CTSB|DLG1|COPS5|KIRREL1|MSN|RAP1A|SLK|CLIC4|PKP4|SEC31A|CLINT1|CTNNB1
GO Cellular Component	Perinuclear region of cytoplasm	6.64e-09	3031	1.66e-10	0.817783	GO:0048471	727	54	ARF5|YTHDC2|TPD52L2|EHD4|DOK1|HIP1R|WDR44|ARF3|TAOK1|ANKRD13A|MAP2K2|EHD2|SLC9A1|CBL|RAPGEF2|RAB10|EGFR|SH3RF1|IGF2BP1|ITGA2|SEC23A|RAB1B|ARHGAP1|PAK2|ITGA3|FMN2|EIF4A2|EZR|PARK7|TP53BP2|CTSB|DLG1|FYN|COPS5|KIRREL1|MSN|RAP1A|SLK|PKN2|NCS1|STXBP1|CLIC4|OPTN|SBF1|DNM2|PKP4|PICALM|ANXA4|SEC31A|ITGB1|CLINT1|EHD1|CYFIP1|CTNNB1
Monarch Phenotype	Pes planus	0.0142	3031	0.00022	0.184771	HP:0001763	308	21	AHCY|ACTA2|MPP5|SLC12A2|RAB7A|NONO|SEC23A|FTSJ1|BGN|ACSL4|PSMD12|MYPN|MYLK|STXBP1|FGD1|SBF1|GARS1|WASF1|GDI1|FLNB|TPM2
InterPro Domains	PH-like domain superfamily	2.81e-07	3031	1.57e-10	0.655129	IPR011993	435	40	SNX17|DOK1|PLCG1|VASP|NUMBL|FARP2|RASA1|DOCK11|CYTH3|BCR|ABR|RASA3|EPB41L1|ARHGEF1|EZR|PTK2|FERMT2|FRMD6|ARHGAP12|ITSN2|MSN|PHLDB1|CDC42BPA|PTPN14|EPB41L2|NIBAN2|FGD1|SBF1|DNM2|ARAP1|NECAP2|SHC1|PHLDB2|AFAP1|MYO10|TLN2|FARP1|DOCK10|EPS8|RDX
GO Cellular Component	Phagocytic vesicle	0.00028	3031	1.66e-05	0.355284	GO:0045335	139	15	SNAP23|ITGAV|RAB10|RAB7A|ZDHHC5|ITGB5|HGS|RAB11B|STXBP3|STXBP1|DNM2|ANXA11|FLNB|ACTG1|CDC42
GO Biological Process	Phagocytosis	0.00062	3031	1.43e-05	0.320761	GO:0006909	173	17	ITGAV|RAB7A|AXL|BCR|MET|PTK2|ARHGAP12|FYN|DNM2|ITGB1|CORO1C|ANXA11|CNN2|YES1|PIP5K1C|ARL8B|CDC42
KEGG Pathways	Phagosome	5.66e-05	3031	4.88e-06	0.424718	hsa04145	141	16	SEC61B|CANX|ITGAV|TUBB4A|RAB7A|ITGA5|ITGB5|ITGA2|TUBB6|TUBB3|HGS|TUBB4B|ITGB1|ATP6V1C1|TUBA1C|ACTG1
Monarch Phenotype	Phenotypic abnormality	3.71e-07	3031	1.52e-10	0.643063	HP:0000118	5129	209	EFNB1|SNAP29|AHCY|RP2|AIMP2|SERPINE1|AK1|ACTA2|GALK1|SLC25A11|SNX17|SLC1A4|PMPCB|NECTIN2|PI4KA|RRAS2|NOTCH2|ITGAV|MPP5|TAOK1|AARS1|PDGFRB|SLC12A2|MAP2K2|SLC9A1|ARCN1|CBL|TUBB4A|CUL3|RAB7A|NRP1|TNPO3|ACAT1|PIK3C2A|IQGAP1|CDH11|CDH2|SCYL1|RASA1|EGFR|NONO|VPS51|CCT5|ANK3|QDPR|RPIA|FLCN|GNAQ|NRG1|MYO1E|CSTB|BAX|DNAAF5|INPPL1|HPRT1|STAT6|DIP2B|MAP2K1|BCR|CTNNA1|YWHAG|SEC23A|MMP14|ACAD9|GNAI2|ITGA3|DNM…
GO Molecular Function	Phosphatase binding	3.86e-05	3031	4.62e-07	0.441341	GO:0019902	198	21	CSK|LGALS3|SLC9A1|PXN|IQGAP1|CDH2|EGFR|STAT6|MET|PTK2|DLG1|ATP2B4|ANKLE2|PHACTR4|PPP3CB|TPRN|SIRPA|PPP1R9B|PPP1R18|CTNNB1|JAK1
GO Biological Process	Phosphate-containing compound metabolic process	3.4e-10	3031	1.97e-12	0.946852	GO:0006796	1877	106	TAB1|CSK|RIPK2|NAMPT|AK1|GALK1|PLCG1|EFR3A|PI4KA|CCNB1|TAOK1|PDGFRB|AJUBA|MAP2K2|NRP1|PRKAR2A|ACAT1|PIK3C2A|PFKL|SCYL1|PGD|EGFR|USP15|RPIA|ATP5MF|BAX|ABI2|INPPL1|HPRT1|COPS2|AXL|MAP2K1|BCR|ABR|PFAS|PAK2|MET|PKM|ENO3|PPP2R1A|HGS|PLCB1|ACSL4|PARK7|PTK2|MAP4K4|DLG1|FYN|MINK1|ATP5F1C|GMFB|EPHB4|EPHA2|PTPRF|MYLK|IQGAP3|CDC42BPA|PTPN14|MAP3K7|MPP1|SLK|GNAI3|CHUK|PKN2|DPM1|CMPK1|STK4|NEK6|ABI1|PIP4K2A|A…
GO Molecular Function	Phosphatidylinositol binding	3.51e-05	3031	4.05e-07	0.445469	GO:0035091	270	25	SNX8|RAB35|SNX17|HIP1R|SNX1|SLC9A1|PIK3C2A|IQGAP1|MYO1E|CYTH3|HGS|EXOC7|PLCB1|MTSS2|SNX18|FERMT2|ANXA2|PARD3|SNX2|SNX9|PICALM|ARAP1|FCHO2|MYO10|BCAS3
GO Molecular Function	Phosphatidylinositol phosphate binding	0.0043	3031	6.82e-05	0.236653	GO:1901981	178	16	RAB35|HIP1R|SLC9A1|IQGAP1|CYTH3|EXOC7|PLCB1|MTSS2|SNX18|FERMT2|ANXA2|PARD3|PICALM|ARAP1|FCHO2|MYO10
STRING Clusters	Phosphatidylinositol phosphate kinase activity, and Phosphatidylinositol phosphate phosphatase activity	0.0402	3031	0.0011	0.139577	CL:15087	25	5	PI4KA|PIK3C2A|INPPL1|PIP4K2A|PIP5K1C
KEGG Pathways	Phosphatidylinositol signaling system	0.0207	3031	0.006	0.168403	hsa04070	94	8	PLCG1|PI4KA|PIK3C2A|INPPL1|PLCB1|PIP4K2A|PLCB3|PIP5K1C
GO Molecular Function	phosphatidylinositol-3,4,5-trisphosphate binding	0.0131	3031	0.00023	0.188273	GO:0005547	40	7	HIP1R|IQGAP1|CYTH3|FERMT2|PARD3|ARAP1|MYO10
GO Molecular Function	phosphatidylinositol-4,5-bisphosphate binding	0.0033	3031	5.01e-05	0.248149	GO:0005546	85	11	RAB35|HIP1R|SLC9A1|EXOC7|PLCB1|MTSS2|SNX18|ANXA2|PARD3|PICALM|FCHO2
WikiPathways	Phosphoinositides metabolism	0.0073	3031	0.00062	0.213668	WP4971	48	7	PLCG1|PIK3C2A|PLCB1|PIP4K2A|SBF1|PLCB3|PIP5K1C
KEGG Pathways	Phospholipase D signaling pathway	7.38e-06	3031	4.62e-07	0.513194	hsa04072	147	18	RALA|PLCG1|RRAS2|PDGFRB|MAP2K2|RALB|EGFR|CYTH3|ARF6|MAP2K1|PLCB1|FYN|NRAS|DNM2|RHOA|SHC1|PLCB3|PIP5K1C
GO Molecular Function	Phospholipid binding	2.87e-07	3031	2.85e-09	0.654212	GO:0005543	464	39	SNX8|RAB35|SNX17|HIP1R|SNX1|PACSIN2|SLC9A1|RAPGEF2|PIK3C2A|IQGAP1|MYO1E|ANXA5|RAPGEF6|CYTH3|AXL|CPNE1|HGS|EXOC7|PLCB1|MTSS2|SNX18|FERMT2|ANXA2|ANXA7|PARD3|SNX2|SNX9|PICALM|ARAP1|ANXA4|FCHO2|ANXA11|SHC1|EPN1|MYO10|CLINT1|C2CD5|BCAS3|ARHGAP35
UniProt Keywords	Phosphoprotein	8.78e-72	3031	1.31e-74	7.10565	KW-0597	8122	433	BAIAP2L1|DVL2|RANBP9|PSMC4|YTHDC2|EFNB1|SNAP29|TAB1|PYGB|TPD52L2|AHCY|CSK|EHD4|RIPK2|TBC1D17|CDC37|NAMPT|MPP6|SNX8|AIMP2|PSMA2|YKT6|SEC61B|AK1|RPL19|GALK1|SLC25A11|LRRC59|ARPC3|RAB35|EXOC2|SNX17|DOK1|SLC1A4|DDX39A|ADGRE5|PLCG1|VASP|TRAP1|CANX|CDC42EP1|SNAP23|TSG101|CNN1|NECTIN2|NUMBL|HIP1R|GRWD1|EXOC4|WDR44|LGALS3|EFR3A|PI4KA|RRAS2|CCNB1|NOTCH2|PRPH|TBRG4|BCAR3|PSMC1|IPO5|MPP5|PSMD11|TAOK1|ANKRD1…
GO Biological Process	Phosphorus metabolic process	3.34e-10	3031	1.89e-12	0.947625	GO:0006793	1902	107	TAB1|CSK|RIPK2|NAMPT|AK1|GALK1|PLCG1|EFR3A|PI4KA|CCNB1|TAOK1|PDGFRB|AJUBA|MAP2K2|NRP1|PRKAR2A|ACAT1|PIK3C2A|PFKL|SCYL1|PGD|EGFR|USP15|RPIA|ATP5MF|BAX|ABI2|INPPL1|HPRT1|COPS2|AXL|MAP2K1|BCR|ABR|PFAS|PAK2|MET|UGDH|PKM|ENO3|PPP2R1A|HGS|PLCB1|ACSL4|PARK7|PTK2|MAP4K4|DLG1|FYN|MINK1|ATP5F1C|GMFB|EPHB4|EPHA2|PTPRF|MYLK|IQGAP3|CDC42BPA|PTPN14|MAP3K7|MPP1|SLK|GNAI3|CHUK|PKN2|DPM1|CMPK1|STK4|NEK6|ABI1|PIP4…
GO Biological Process	Phosphorylation	1.73e-07	3031	1.64e-09	0.676195	GO:0016310	966	62	TAB1|CSK|RIPK2|AK1|GALK1|PI4KA|CCNB1|TAOK1|PDGFRB|MAP2K2|NRP1|PRKAR2A|PIK3C2A|PFKL|SCYL1|EGFR|USP15|BAX|ABI2|COPS2|AXL|MAP2K1|BCR|ABR|PAK2|MET|PKM|ENO3|HGS|PTK2|MAP4K4|FYN|MINK1|GMFB|EPHB4|EPHA2|MYLK|IQGAP3|CDC42BPA|MAP3K7|SLK|CHUK|PKN2|CMPK1|STK4|NEK6|ABI1|PIP4K2A|PPP3CB|ILK|EPHB2|CDK5|PBK|PRKAB1|PEAK1|YES1|COASY|PIP5K1C|CASK|ENO1|CDC42|JAK1
GO Molecular Function	Phosphotransferase activity, alcohol group as acceptor	8.66e-06	3031	9.31e-08	0.506248	GO:0016773	692	46	CSK|RIPK2|GALK1|PI4KA|TAOK1|PDGFRB|MAP2K2|NRP1|PIK3C2A|PFKL|SCYL1|EGFR|AXL|MAP2K1|BCR|ABR|PAK2|MET|PKM|PTK2|MAP4K4|FYN|MINK1|EPHB4|EPHA2|MYLK|CDC42BPA|MAP3K7|SLK|CHUK|PKN2|STK4|NEK6|PIP4K2A|ILK|EPHB2|CDK5|PBK|PRKAB1|PEAK1|YES1|COASY|PIP5K1C|PPP1R9B|CASK|JAK1
WikiPathways	Photodynamic therapy-induced HIF-1 survival signaling	0.0376	3031	0.0045	0.142481	WP3614	36	5	SERPINE1|PFKL|BAX|PKM|SLC2A1
SMART Domains	PhoX homologous domain, present in p47phox and p40phox.	0.0162	3031	0.0003	0.179048	SM00312	42	7	SNX8|SNX17|SNX1|PIK3C2A|SNX18|SNX2|SNX9
WikiPathways	Physico-chemical features and toxicity-associated pathways	0.00059	3031	2.94e-05	0.322915	WP3680	65	10	PLCG1|ACTR3|CBL|EGFR|MAP2K1|PTK2|MYLK|RHOA|SHC1|CTNNB1
WikiPathways	Physiological and pathological hypertrophy of the heart	0.0468	3031	0.0062	0.132975	WP1528	24	4	IL6ST|PPP3CB|NFATC4|RHOA
KEGG Pathways	PI3K-Akt signaling pathway	0.0012	3031	0.00018	0.292082	hsa04151	349	23	CDC37|ITGAV|PDGFRB|MAP2K2|EGFR|ITGA5|ITGB5|ITGA2|MAP2K1|YWHAG|ITGA3|MET|PPP2R1A|PTK2|EPHA2|NRAS|CHUK|PKN2|ITGB1|MAGI1|PPP2R5D|ITGA7|JAK1
WikiPathways	PI3K-Akt signaling pathway	0.0076	3031	0.00065	0.211919	WP4172	336	21	CDC37|ITGAV|PDGFRB|MAP2K2|EGFR|ITGA5|ITGB5|ITGA2|MAP2K1|ITGA3|MET|PPP2R1A|PTK2|EPHA2|NRAS|CHUK|PKN2|ITGB1|PPP2R5D|ITGA7|JAK1
Reactome Pathways	PI5P, PP2A and IER3 Regulate PI3K/AKT Signaling	0.0248	3031	0.0037	0.160555	HSA-6811558	106	9	PDGFRB|EGFR|NRG1|MET|PPP2R1A|FYN|PIP4K2A|PPP2R5D|PIP5K1C
Reactome Pathways	PIP3 activates AKT signaling	0.013	3031	0.0017	0.188606	HSA-1257604	266	17	PSMC4|PSMD10|PSMA2|PSMC1|PSMD11|PDGFRB|EGFR|NRG1|MET|PPP2R1A|FYN|PSMD12|CHUK|PIP4K2A|PSME1|PPP2R5D|PIP5K1C
TISSUES	Placenta	1.15e-26	3031	8.98e-29	2.59393	BTO:0001078	1244	114	AHCY|PSMD10|CDC37|SERPINE1|ACTA2|SNX17|ADGRE5|CANX|SNAP23|TSG101|CNN1|CCNB1|ARF3|AARS1|COTL1|EHD2|NAPA|SLC9A1|TUBB4A|PDCD6|RAB7A|PXN|IQGAP1|RASA1|EGFR|NONO|AKR1B1|GNAQ|ITGA5|ANXA5|CYTH3|CRK|CTNNA1|MMP14|RAB1B|PKM|TUFM|PPP2R1A|HNRNPM|EIF4A2|BGN|EXOC7|EZR|ACSL4|PTK2|RPS2|FERMT2|CTSB|ANXA2|RPLP1|RPS3A|ATG7|FYN|PLS3|ATP5F1C|COPS5|MSN|MYLK|CYB5R3|COMT|TAGLN2|MPP1|CNN3|PDLIM1|AMOT|EIF2S2|ABI1|ACOT7|AHN…
COMPARTMENTS	Plasma membrane	4.15e-13	3031	5.59e-15	1.2382	GOCC:0005886	3535	173	RALA|BAIAP2L1|EFNB1|SNAP29|RP2|CD82|RAB35|SLC1A4|ADGRE5|PLCG1|VASP|SNAP23|TSG101|NECTIN2|HIP1R|EXOC4|LGALS3|EFR3A|PI4KA|NOTCH2|ITGAV|ANKRD13A|PDGFRB|SLC12A2|AJUBA|MAP2K2|PACSIN2|EHD2|SLC9A1|CBL|CUL3|RAPGEF2|CDH6|NRP1|PRKAR2A|SRI|PIK3C2A|IDE|VPS37B|PXN|IQGAP1|CDH11|CDH2|RALB|EGFR|ANK3|GNAQ|ZDHHC5|NRG1|ITGA5|ITGB5|ITGA2|RAPGEF6|CYTH3|ARF6|STAT6|AXL|MAP2K1|CTNNA1|MMP14|CSPG4|GNAI2|ITGA3|MET|RAP2B|BA…
GO Cellular Component	Plasma membrane	5.21e-23	3031	6.37e-25	2.22832	GO:0005886	5544	267	ARF5|RALA|BAIAP2L1|DVL2|RANBP9|EFNB1|SNAP29|RP2|CSK|EHD4|MPP6|SERPINE1|YKT6|SLC25A11|CD82|RAB35|EXOC2|SLC1A4|ADGRE5|PLCG1|VASP|CANX|CDC42EP1|SNAP23|TSG101|NECTIN2|HIP1R|EXOC4|LGALS3|EFR3A|PI4KA|RRAS2|NOTCH2|ARF3|PRPH|ITGAV|MPP5|ANKRD13A|PDGFRB|COTL1|SMURF2|SLC12A2|AJUBA|MAP2K2|PACSIN2|EHD2|NAPA|SLC9A1|EHBP1|CBL|CUL3|RAPGEF2|RAB10|RAB7A|CDH6|NRP1|PRKAR2A|SRI|PIK3C2A|IDE|VPS37B|PXN|IQGAP1|CDH11|CDH…
COMPARTMENTS	Plasma membrane bounded cell projection	8.59e-17	3031	8.59e-19	1.6066	GOCC:0120025	1285	97	SNAP29|RP2|AK1|ARPC3|RAB35|PLCG1|VASP|HIP1R|EXOC4|ITGAV|SLC12A2|ACTR3|SLC9A1|CBL|TUBB4A|CUL3|RAPGEF2|RAB10|PRKAR2A|PXN|IQGAP1|CDH2|EGFR|ANK3|SH3RF1|FLCN|IGF2BP1|ITGA5|ABI2|ARF6|DIP2B|ACAD9|ITGA3|BASP1|MPDZ|TUBB3|PPP2R1A|EXOC7|PLS1|EZR|MTSS2|PTK2|SEPTIN6|DPYSL3|ATG7|FYN|ATP2B4|TPM1|EPHA2|MSN|MYLK|NCKAP1|CDC42BPA|UTRN|ARHGAP18|RAB13|RAP1A|PKN2|AMOT|DLG5|PHACTR4|CLIC4|PARD3|FGD1|ABI1|NHS|FSCN1|GARS1…
GO Cellular Component	Plasma membrane bounded cell projection	8.46e-30	3031	7.02e-32	2.90726	GO:0120025	2268	166	SNAP29|AHCY|RP2|YKT6|AK1|ACTA2|ARPC3|RAB35|SLC1A4|PLCG1|VASP|CANX|SNAP23|HIP1R|EXOC4|NOTCH2|PRPH|ITGAV|MPP5|SNX1|SLC12A2|AJUBA|ACTR3|PACSIN2|SLC9A1|CBL|TUBB4A|CUL3|RAPGEF2|RAB10|NRP1|PRKAR2A|PXN|IQGAP1|CDH2|ARL8A|RASA1|EGFR|ANK3|SH3RF1|FLCN|GNAQ|ZDHHC5|NRG1|MYO1E|IGF2BP1|ITGA5|ABI2|ITGA2|CYTH3|INPPL1|ARF6|DIP2B|BCR|ABR|CTNNA1|CSPG4|ACAD9|GNAI2|ITGA3|FMN2|BASP1|NQO1|MPDZ|PKM|TUBB3|LLGL1|PPP2R1A|NE…
[truncated: 808 more rows]
